# Supplementary material for: Comparative analysis of simulated in-situ colonization and degradation by Lentinula edodes on oak wafer and corn stalk
Source: Front Microbiol. 2023 Nov 23;14:1286064. doi: 10.3389/fmicb.2023.1286064 (PMC10701760; doi:10.3389/fmicb.2023.1286064)
Supplement: Supplementary file 1 [file Data_Sheet_1.XLSX]

## Sheet: total gene_norm_expression
gene_ID	cs_1_a	cs_1_b	cs_1_c	cs_2_a	cs_2_b	cs_2_c	cs_3_a	cs_3_b	cs_3_c	ow_1_a	ow_1_b	ow_1_c	ow_2_a	ow_2_b	ow_2_c	ow_3_a	ow_3_b	ow_3_c
LE01Gene00001	0	0	2.47229	0	0	0	0	2.63244	3.32157	0	0	0	0	0	0	0	2.67174	2.57719
LE01Gene00002	8.58293	9.49479	9.30892	9.5433	9.6786	9.52799	10.3766	10.0553	9.48669	10.6028	9.89498	10.3668	10.0616	10.4316	10.2994	8.90688	10.6436	10.0848
LE01Gene00003	11.5715	11.1844	11.3445	10.8867	10.9833	10.7824	10.8051	10.8577	10.6319	11.5974	11.7077	11.9255	11.1797	11.0742	11.3448	11.5063	10.9677	10.7092
LE01Gene00004	11.0695	10.7375	10.3416	10.3409	10.0704	10.3467	10.4868	10.288	10.1666	10.9788	11.3859	11.2202	10.8865	10.7757	10.4379	10.6247	10.4936	10.2231
LE01Gene00005	8.42191	8.26931	8.02911	8.29053	8.67872	8.59536	9.14245	8.8082	8.83447	8.23806	7.81098	8.62357	8.63232	8.43471	8.4346	8.29774	8.46078	8.82358
LE01Gene00006	11.5805	11.445	11.4473	9.93773	10.2503	9.74371	9.55684	10.5018	9.58292	11.6172	11.6061	11.2141	9.29448	9.14066	9.0773	9.39645	9.00419	8.68766
LE01Gene00007	12.306	12.1814	12.3516	10.7711	10.8163	10.8899	10.0843	10.2686	9.82038	11.9916	11.8873	11.6153	9.80966	9.61615	9.37981	9.93848	9.55253	9.54335
LE01Gene00008	10.9079	10.6168	10.9552	10.9767	11.0853	11.0436	11.2502	11.482	11.1932	10.8686	10.6357	10.7095	10.6774	10.8509	11.0146	11.0659	10.6856	10.61
LE01Gene00009	12.3542	12.8634	12.881	12.9002	12.9842	12.8709	12.794	12.8595	12.5366	12.523	12.0668	12.291	12.2631	11.9928	12.1592	12.0477	12.2812	12.5061
LE01Gene00010	11.9327	11.5717	11.876	11.7531	11.8481	11.7283	11.8842	11.8916	11.8936	11.7054	11.6847	11.7816	11.5244	11.5348	11.5025	11.8704	11.4577	11.2374
LE01Gene00011	11.6828	12.3508	12.0236	11.6296	11.8407	11.5656	11.7045	12.2254	11.7657	12.2083	11.7156	11.7	11.4525	11.4097	11.6345	11.1954	11.6969	11.5667
LE01Gene00012	7.95695	8.36884	8.35995	8.78887	9.23372	9.10739	9.79809	10.0666	9.6511	8.49255	8.41432	8.59375	8.62891	8.68896	9.12879	8.29774	9.1257	9.283
LE01Gene00013	11.3297	11.3519	11.4126	11.4105	11.8741	11.4593	11.6532	12.0157	11.6812	11.1727	11.0995	10.966	11.4496	11.0781	11.53	11.3239	11.2921	11.49
LE01Gene00014	10.8998	10.7743	11.0418	11.3801	11.3998	11.4777	11.2321	11.3011	11.1439	10.4105	10.7197	10.6708	11.2306	11.2671	11.2549	11.2315	11.3912	11.4825
LE01Gene00015	6.96794	6.88123	7.26543	8.29529	9.0978	8.6477	8.16648	7.87032	7.88987	6.6158	7.20431	6.35228	8.43971	8.76785	7.56217	8.02588	9.4697	10.6613
LE01Gene00016	4.9817	5.10988	4.26281	6.8926	7.03043	6.60298	7.45696	6.65612	7.14554	3.28342	3.41093	3.91864	5.49119	5.62416	3.21153	5.96496	5.49347	5.89771
LE01Gene00017	8.87329	8.9355	9.21927	10.0891	11.2274	10.3924	10.2063	11.2735	10.4502	7.43313	8.26866	7.83907	10.1769	10.3495	10.0439	10.2623	9.94262	10.6859
LE01Gene00018	13.6091	13.4274	14.6001	15.1125	15.9941	15.3519	14.8883	15.8396	14.9865	12.7625	12.9629	13.5795	14.7595	14.8778	15.4153	14.7335	15.0424	15.7616
LE01Gene00019	11.1955	11.3225	11.1393	10.2099	10.2168	10.1061	9.72138	9.77097	9.87669	11.5847	11.4539	11.3379	10.574	10.7702	10.3954	10.1974	10.87	10.1718
LE01Gene00020	7.11567	7.26951	7.65225	7.26637	7.47838	7.04931	7.343	7.45734	7.3779	7.6227	7.90678	7.50436	6.91616	7.26395	6.73278	6.98991	7.03345	5.96809
LE01Gene00021	8.54172	8.26033	8.6969	7.96618	8.46673	8.14926	8.09786	8.56046	8.59533	7.55729	7.76698	7.44714	7.88755	7.72577	8.06892	7.90352	7.72507	8.3873
LE01Gene00022	9.15188	9.49862	9.58326	9.9438	9.70304	9.85325	9.84452	9.41205	9.76551	8.7933	8.89504	8.29331	9.19434	9.14559	9.09103	9.30515	9.1257	9.58313
LE01Gene00023	17.3211	17.1783	17.0667	17.0334	17.1945	17.0697	16.8979	16.9724	17.4151	16.8562	16.9576	17.0282	16.7481	16.5213	16.7502	16.9024	16.5151	17.0304
LE01Gene00024	12.9441	12.6797	12.6469	13.0149	13.0376	13.0866	13.0118	12.8106	13.4391	12.5428	12.7135	12.8078	12.8703	12.7729	12.8575	12.8884	12.6731	13.0308
LE01Gene00025	13.3637	13.3172	13.6926	13.9802	13.7459	13.9365	13.5461	13.3491	13.5148	14.2568	14.3595	14.696	14.8399	14.8269	15.3807	15.1447	15.0062	15.0109
LE01Gene00026	11.3377	11.6208	11.3385	10.9827	11.0872	10.8877	11.0117	11.0624	10.9888	12.3166	12.3432	12.3982	12.2496	12.5437	12.609	12.3624	12.6424	12.09
LE01Gene00027	11.6011	11.6602	11.4155	10.6613	10.731	10.7746	10.8532	10.896	10.6165	12.1684	11.9662	12.2027	10.8815	10.8119	11.1474	11.2104	10.5464	10.7687
LE01Gene00028	11.2038	11.2282	10.8252	10.6211	10.9173	10.7088	10.6073	10.8225	10.7478	11.0145	11.1904	11.078	10.6716	10.4899	10.3618	10.3339	10.2067	10.5943
LE01Gene00029	8.72777	8.6999	9.10473	9.68951	9.8149	9.86214	10.1504	9.65849	9.98633	8.20522	8.44656	8.38758	9.21266	9.61793	9.19639	9.20249	9.60523	10.02
LE01Gene00031	5.40584	5.49413	4.7266	5.0002	4.90363	4.10376	6.10724	5.22516	5.52317	3.28342	3.41093	4.81949	0	5.08147	3.95055	2.38927	0	0
LE01Gene00032	9.70444	10.1586	9.82385	10.3535	10.0829	10.1503	9.90602	10.0567	9.91921	8.57565	8.34333	8.27463	9.27064	8.38969	8.77454	8.6722	8.31751	9.0047
LE01Gene00033	9.60625	10.0429	9.98017	10.169	10.2179	10.1635	10.3175	10.1429	10.0927	9.29038	8.92966	9.21223	9.38004	9.25004	9.4454	8.94461	9.08347	9.83145
LE01Gene00034	11.6697	11.5548	11.101	10.3501	10.1755	10.2337	9.43064	9.48087	9.97831	11.1624	11.221	10.6903	9.36987	9.25461	9.36858	9.29788	9.09769	8.58315
LE01Gene00035	10.8937	10.298	10.4646	10.4398	10.3414	10.2439	10.3366	10.1666	10.4891	10.2518	10.506	10.2426	10.192	10.098	10.1939	10.7029	10.0178	9.82357
LE01Gene00036	13.3307	13.4565	12.898	11.9563	12.2283	11.9404	11.5796	12.228	11.8047	13.3579	13.3855	13.1645	12.0853	11.901	11.9362	12.2713	11.8407	11.7342
LE01Gene00037	9.92481	9.91554	9.87227	8.94526	9.28643	9.29409	9.04971	9.82325	9.21907	10.147	10.3927	10.104	9.55892	9.86519	9.76263	9.69092	9.54425	9.25278
LE01Gene00038	11.9632	12.266	12.0747	11.2576	11.6296	11.1363	11.0788	11.5526	11.1251	12.162	12.0403	11.9366	11.2154	11.4346	11.4995	11.2251	11.6285	11.307
LE01Gene00039	10.7044	10.4725	11.1387	11.9008	11.4708	11.9512	11.4979	11.1235	11.3198	10.6688	10.2492	10.5352	11.2874	11.6542	10.9685	12.2049	12.7887	11.8579
LE01Gene00040	12.8977	13.4475	13.3592	13.0454	12.7582	13.1721	12.7741	12.6427	12.8295	13.0226	12.6132	12.8201	12.7797	12.5588	12.5156	12.4952	12.8601	12.9541
LE01Gene00041	11.218	11.2952	11.2164	11.6235	11.3288	11.4112	11.5796	11.2638	11.6788	11.0387	10.5859	10.8667	11.3425	11.2379	11.455	11.2888	11.4649	11.4403
LE01Gene00042	10.1989	10.2062	10.2048	10.2261	10.0841	10.2786	10.2828	10.061	10.3849	10.4309	10.1922	10.3546	10.4929	10.5507	10.7306	10.6111	10.5608	10.4378
LE01Gene00043	10.5186	10.6282	10.1573	9.89138	10.1172	10.0054	10.0549	10.0326	9.87669	10.8413	10.7507	10.7191	9.83056	10.3291	10.6013	10.2283	10.319	10.2231
LE01Gene00045	0	0	0	3.74435	2.72242	3.63581	4.35128	2.36753	3.96541	0	0	0	2.9165	2.76525	2.624	3.88523	3.26231	2.57719
LE01Gene00046	10.6169	10.0177	10.5362	11.2733	10.8539	10.6848	10.3366	10.341	10.1089	10.2701	10.34	10.4378	10.3575	10.8072	10.4336	10.954	11.4389	11.9568
LE01Gene00047	11.7294	11.7762	12.3234	12.4059	13.495	12.6974	12.5956	13.7351	12.6913	11.6042	11.7862	11.6636	12.6538	12.4936	13.1729	12.4714	12.368	13.5647
LE01Gene00048	11.2391	10.9105	11.5454	13.6989	14.4999	13.623	14.0998	14.8228	14.267	10.9402	11.5796	11.5405	13.3936	14.0466	14.8877	13.8187	14.4223	15.2923
LE01Gene00049	12.9181	12.7045	13.2416	11.8629	12.1382	11.9028	11.549	12.0638	11.6733	13.241	13.26	12.9838	12.2407	12.2875	11.8521	12.411	12.5293	11.678
LE01Gene00050	11.0574	11.4524	11.2019	11.0053	10.8983	11.0973	10.6795	10.5891	10.882	11.1018	10.7206	10.6982	10.8671	10.2895	10.6099	10.5328	10.7608	11.2374
LE01Gene00051	11.0683	10.8822	10.8267	10.6126	10.7397	10.8141	10.7884	10.7915	11.0574	11.1183	10.7779	11.0692	10.4958	10.4526	10.6678	10.3702	10.1749	10.2887
LE01Gene00052	11.5501	12.1643	11.6783	10.7643	10.9359	10.9838	10.9528	10.7991	11.1659	11.6795	11.4647	11.3232	10.6666	10.8165	11.019	11.145	11.4461	11.1793
LE01Gene00053	9.82957	9.7147	9.23024	9.23973	9.17437	9.05151	8.88178	8.83474	9.16639	9.77898	9.73941	9.7857	9.09663	8.26832	9.45817	9.37589	8.63853	8.80126
LE01Gene00054	12.8136	13.2894	12.9117	12.0201	12.169	12.0806	11.7825	11.8108	11.8872	12.8989	12.6804	12.5652	11.5771	11.7305	11.455	11.8188	12.3013	12.1493
LE01Gene00055	12.003	11.4952	11.8542	11.7449	11.5742	11.8338	11.664	11.5355	11.876	11.278	11.7386	11.2275	12.3286	12.4087	12.1507	12.0893	12.0145	12.1057
LE01Gene00056	9.47558	9.46381	9.71248	9.78724	9.94627	9.90863	9.73992	9.82821	9.69874	9.2859	8.96348	8.96966	9.55713	9.44468	9.12078	9.5894	9.73276	9.6631
LE01Gene00057	9.14042	9.38123	9.52566	9.81895	10.0349	10.0266	10.3284	10.3352	10.0942	8.85509	8.78273	8.99269	8.97581	9.41843	9.67602	9.09477	9.8782	9.42322
LE01Gene00058	11.7171	11.4657	11.2175	11.2527	11.674	11.4132	11.3535	11.9497	11.4198	11.571	11.6766	11.7021	11.5828	11.502	12.3949	11.8377	11.5573	11.6091
LE01Gene00059	9.27434	9.67805	9.58668	9.23231	9.09041	9.27647	9.80202	9.25636	9.68106	10.0287	9.96898	9.95801	9.4121	9.44867	9.69772	9.90697	9.53801	9.47651
LE01Gene00060	11.8772	11.3889	11.3103	9.82225	10.3465	10.1023	9.98586	10.4935	9.71428	11.9106	12.0453	11.9307	10.5526	10.2223	10.8756	10.8234	9.85496	9.97652
LE01Gene00061	12.288	12.2038	12.3578	12.155	12.4038	12.3008	12.2271	12.5818	12.1589	12.2289	12.0515	12.1093	12.1387	11.9952	12.2836	12.2391	11.947	12.3603
LE01Gene00062	12.0991	12.007	12.2758	12.1102	12.3865	12.0919	12.283	12.5067	12.2077	11.8367	11.8576	11.7849	11.8441	12.0016	11.5859	12.1349	12.3603	11.9009
LE01Gene00063	14.2185	14.0927	13.925	12.7213	12.8541	12.7009	12.3669	12.9965	12.5391	14.0362	14.0966	13.9361	12.4866	12.5223	12.9031	13.0194	12.6081	12.5646
LE01Gene00064	13.4529	13.3471	13.2583	12.3037	12.5298	12.2444	12.1724	12.5666	12.2972	13.3728	13.4776	13.466	12.368	12.0964	12.7865	12.7374	12.1224	12.2827
LE01Gene00065	10.3033	10.2386	10.7533	9.93316	9.58353	10.1148	9.92234	9.59587	9.96051	10.459	11.0214	10.4974	10.5041	10.6478	9.89842	9.79096	9.9204	10.4644
LE01Gene00066	10.7926	11.0257	10.5067	9.63242	10.3496	9.93975	9.71306	10.2735	9.96701	10.8798	10.611	10.251	9.65582	10.582	9.72791	9.41	9.40943	9.93465
LE01Gene00067	11.5711	11.1525	11.6236	13.7152	13.1352	13.6712	13.9531	12.9506	13.4919	12.0919	12.1314	12.1325	13.4049	13.1636	12.5416	12.8026	12.8513	12.545
LE01Gene00068	9.45538	9.52324	9.37565	12.7873	11.1323	11.3852	12.9307	11.1382	13.0615	9.07358	9.17066	9.51241	10.192	10.117	10.704	11.258	10.4599	12.8589
LE01Gene00069	10.8737	10.7908	10.5564	10.7873	10.7326	10.6638	10.8051	10.8967	10.6969	10.6654	10.6745	10.5815	10.7614	10.8815	11.0283	10.8402	10.4904	10.781
LE01Gene00070	9.18348	9.13798	9.24762	8.08626	7.39283	7.73107	7.28806	6.70009	6.93624	8.54972	8.64018	8.12106	8.17127	8.31723	6.02327	6.89032	7.5208	8.4419
LE01Gene00071	9.87036	9.49095	9.92183	10.3294	10.1673	10.2417	9.95621	10.061	9.85408	9.02332	8.90087	8.11582	9.30945	9.20113	8.23639	9.31478	8.69198	9.57376
LE01Gene00072	11.724	11.6426	11.7337	11.6159	11.5649	11.5773	11.7929	11.8426	11.8842	11.8644	11.981	11.9262	11.4375	11.547	11.9148	12.0386	11.3129	11.5133
LE01Gene00073	13.262	13.2207	13.0674	13.2649	12.8832	13.2903	13.545	13.0614	13.621	13.1939	13.1314	13.0446	12.3948	12.4588	12.7049	12.6538	12.1662	12.1468
LE01Gene00074	11.4589	11.4933	11.5546	11.1664	11.4018	11.4382	11.3688	11.4038	11.4227	11.1617	10.9903	11.3083	11.4001	11.4122	11.2833	11.4291	11.3673	11.5794
LE01Gene00075	11.0537	10.8224	10.9723	10.7965	10.9665	10.8315	11.2057	11.0624	10.9695	15.5402	15.7029	16.4538	15.5026	15.7691	16.0604	16.5257	15.8572	14.5831
LE01Gene00076	7.45599	8.26483	7.7285	7.80219	7.71465	7.56684	7.41656	7.33255	7.62805	8.1957	8.2182	8.40486	7.03416	7.75188	8.15508	7.23287	8.3272	8.00751
LE01Gene00077	11.8678	11.5812	11.7049	11.2709	11.2552	10.9919	11.0518	11.3764	11.1856	11.9366	12.1392	12.0904	11.7734	11.9945	12.1162	11.9713	11.8052	11.6205
LE01Gene00078	11.3231	11.1772	11.075	9.81067	10.2734	9.88557	9.44075	10.5506	9.83822	11.6868	11.5631	11.3519	10.1391	9.80879	10.6815	10.5512	9.97379	9.65956
LE01Gene00079	6.03986	5.49413	6.18741	6.85445	6.64284	6.50046	6.99063	4.14097	7.15695	4.81663	6.33953	6.75393	6.68643	6.82155	6.80119	6.75532	6.68745	7.0782
LE01Gene00080	13.8761	13.8008	13.2069	12.394	12.8067	12.0998	11.6102	12.6534	11.9397	13.8703	13.7274	13.4386	11.4429	11.6859	11.6978	12.4965	12.1686	12.0001
LE01Gene00081	11.5034	11.552	11.2339	10.8223	10.8576	10.7493	10.9555	10.9379	10.8888	12.1126	12.0697	11.9856	10.3441	10.5073	10.4422	10.5604	10.2146	10.7867
LE01Gene00082	10.5362	10.2003	10.4136	9.61731	9.51893	9.31582	9.25558	9.29749	8.89025	10.6028	10.7337	10.5104	9.53365	9.21058	9.39317	9.47589	9.47188	8.72201
LE01Gene00083	8.20588	8.36884	8.15878	7.98984	7.95065	8.51124	8.69591	8.29978	8.76903	9.3581	10.7156	10.3368	10.9376	12.6414	11.4087	10.8902	12.6366	11.8393
LE01Gene00084	6.91513	7.17702	6.6594	7.3046	7.42453	7.57407	8.39683	7.5159	8.16325	6.86441	8.54662	7.2509	8.68902	10.1844	8.41727	8.50131	9.86994	8.98786
LE01Gene00085	6.22481	6.34833	5.79678	7.49019	6.36101	7.25223	7.90688	7.05635	7.19066	6.49678	6.28708	5.84525	6.65997	6.69269	6.11213	7.7698	6.92282	6.93326
LE01Gene00086	10.1148	9.82701	10.03	10.7982	10.8884	11.0566	11.2329	10.9101	11.2449	9.437	9.44049	9.29796	10.3657	10.5111	10.0815	10.6179	10.679	11.013
LE01Gene00087	14.6588	14.6806	14.1754	12.9771	13.0511	13.1363	12.7032	13.1109	12.4153	14.7956	14.5651	14.5859	13.1	13.0707	12.8555	12.4568	12.9398	13.1937
LE01Gene00088	10.078	9.39977	10.1165	10.0573	10.6258	10.3147	10.224	10.6464	10.3343	9.32354	9.2865	9.7972	10.9804	10.9173	10.8573	10.3196	10.5495	10.5943
LE01Gene00089	10.5177	10.3057	9.99954	8.9513	8.86062	9.06183	8.45784	8.79136	8.71599	10.2859	10.5741	10.5928	9.18277	9.18924	9.22157	9.35035	9.49998	9.23623
LE01Gene00090	11.5079	11.6256	11.2301	9.92091	9.88208	9.92002	9.37374	9.87531	9.42901	11.6064	11.5976	11.5034	10.2793	10.3686	10.6512	9.86496	10.1188	10.0282
LE01Gene00091	10.8661	10.9326	10.7472	9.78217	10.0012	9.40163	9.7683	9.71493	9.31135	10.9968	10.6643	10.8062	9.68071	9.03565	9.81651	9.04353	9.08347	9.54718
LE01Gene00092	8.05784	8.34778	7.94638	8.19201	8.69506	8.252	8.08503	8.97255	8.4728	8.14713	7.72817	7.58237	8.29248	8.38553	8.50603	8.46716	8.62289	8.36138
LE01Gene00093	11.5796	11.3935	11.2705	10.3683	10.6785	10.612	9.79021	10.327	10.3788	11.5426	11.6388	11.2641	10.4798	10.2772	10.5345	10.4983	10.1313	10.2887
LE01Gene00094	0	2.75455	0	4.13222	0	3.52079	0	3.75294	4.55421	2.96258	0	3.91864	1.92873	2.957	3.36405	2.38927	2.40534	4.31306
LE01Gene00095	8.57273	8.78069	8.17703	7.98396	8.04543	8.21085	8.20257	8.32807	7.90349	8.29268	8.52035	8.54393	7.98135	8.44274	8.47286	8.11681	8.95506	8.62005
LE01Gene00096	8.92762	9.6107	9.76018	9.55524	10.0641	9.96609	10.4929	10.4176	10.358	10.3387	10.5278	10.9856	10.8707	11.159	11.5361	10.926	11.2803	11.1116
LE01Gene00097	11.9929	12.217	12.8053	14.8411	14.2896	14.4628	14.9202	14.6021	14.3276	9.48273	9.21811	9.34572	12.5184	12.7019	11.5189	12.7889	13.1325	12.1452
LE01Gene00098	13.8399	13.1882	13.8039	12.659	12.5941	12.9838	12.4627	12.4534	13.0207	12.7577	12.7695	12.2791	12.0571	11.1796	10.7789	11.5416	12.0032	11.3344
LE01Gene00099	13.2736	13.1017	13.0891	11.9738	12.1973	11.94	11.8096	12.2401	11.7731	13.2695	13.2818	13.3111	12.2868	12.1678	12.6651	12.575	12.0635	11.8556
LE01Gene00100	11.5146	11.5816	11.7703	12.3686	12.1326	12.1873	12.2028	12.0725	11.9582	11.8183	11.6702	11.934	12.262	11.9483	12.2455	12.1154	11.891	12.3213
LE01Gene00101	11.7152	11.422	11.3661	11.4653	11.3609	11.5021	11.5507	11.6161	11.8052	11.9607	12.0544	11.9617	12.3289	12.3736	12.0147	12.3411	12.0929	12.3018
LE01Gene00102	9.83099	10.1562	10.4107	11.5681	11.14	11.4598	11.4028	11.1208	11.2077	9.49443	9.13648	9.19743	11.045	11.1742	10.5761	10.4357	11.0929	11.2445
LE01Gene00103	9.665	9.84516	9.82095	10.8748	10.0401	10.2619	10.0351	9.03967	9.46389	10.1408	10.3988	9.82314	11.2103	11.0449	9.65953	11.662	11.3773	10.917
LE01Gene00104	11.3032	11.5566	11.0014	10.357	10.1778	10.335	10.0533	9.70237	9.93089	11.5829	11.6531	11.6907	11.0147	10.3906	10.4497	10.5974	10.4643	10.61
LE01Gene00105	15.1869	15.6607	15.0465	15.0711	14.8248	14.6981	14.2553	13.9961	14.3658	15.1471	15.3569	15.0178	15.12	14.6891	14.6945	14.0734	14.719	15.0996
LE01Gene00106	7.15264	6.26092	6.11351	8.35115	7.76504	8.48079	8.37591	8.01656	8.45442	7.88215	7.715	7.39621	9.18973	9.64952	9.80822	11.4285	10.9387	9.6273
LE01Gene00107	8.0283	7.61093	8.27775	9.56709	9.30783	9.49219	10.0384	9.67694	9.86804	7.54234	7.91256	6.95499	9.13555	9.52447	9.23647	9.14424	9.66945	9.76875
LE01Gene00108	8.95142	9.48325	9.42231	9.7003	9.51893	9.73889	9.76428	9.63791	9.30367	9.06837	8.62618	9.07055	9.35552	9.38754	9.43252	8.48433	9.48708	8.97937
LE01Gene00109	10.7794	10.4119	10.5485	11.6126	11.3822	11.6646	11.6537	11.3793	11.6901	10.457	10.5896	10.6618	11.3461	11.6059	11.4097	11.0745	11.6771	11.7169
LE01Gene00110	10.1148	9.7147	9.92992	9.84836	9.82384	9.80337	9.65346	9.95457	9.74107	10.2859	10.4464	10.5662	10.0754	9.88597	10.25	10.0934	9.44767	9.44189
LE01Gene00111	11.1681	11.063	10.6848	10.6723	10.7126	10.5765	10.4721	11.1841	10.8348	11.4232	11.3544	11.5253	10.8504	10.3591	11.1467	11.1863	10.659	10.4032
LE01Gene00112	10.8486	11.0164	11.13	10.9856	11.1864	11.176	11.3813	11.0319	11.0778	10.6145	10.4454	10.3535	10.8707	10.9395	10.7367	10.6724	11.0149	10.9028
LE01Gene00113	14.535	14.4186	14.4589	13.4668	13.3993	13.5332	12.9049	13.1277	13.1863	13.9497	13.5984	13.1917	12.7635	12.4303	11.687	12.2126	12.8068	12.0665
LE01Gene00114	10.8195	10.6071	10.5849	10.1068	10.3538	10.2918	9.8987	10.2204	10.3293	10.9795	11.1796	11.3339	10.9716	10.5254	10.9774	10.9346	10.325	10.3883
LE01Gene00115	10.7503	10.7456	10.617	10.8313	10.6908	10.7372	10.9511	10.9425	10.9663	10.7426	10.6651	10.9668	10.6649	10.5273	10.9848	10.8158	10.4265	10.8541
LE01Gene00116	8.21027	8.4814	8.4225	9.63617	9.32892	9.64074	9.54986	9.15997	9.51136	7.95732	7.81098	7.61243	8.85856	8.64436	8.34579	8.72735	8.84476	9.01027
LE01Gene00117	11.6484	11.6168	11.5655	11.1402	11.3817	11.0007	10.9252	11.3005	11.1396	11.1562	11.1603	11.046	10.6716	10.5348	10.5829	11.0773	10.4027	10.6435
LE01Gene00118	10.9133	10.8078	10.4393	9.15072	10.0298	9.25189	8.59994	10.0929	8.90724	10.442	10.0167	9.55366	7.54852	7.25485	7.71892	7.79067	7.28275	7.92144
LE01Gene00119	12.2644	12.6826	12.1039	10.4279	10.6487	10.1135	9.92415	10.7415	10.0986	12.5689	12.2755	12.0997	10.4288	10.4763	10.7856	10.5584	10.7292	10.2433
LE01Gene00120	11.5522	11.3418	11.3526	11.065	11.2787	11.0891	10.9608	11.1255	11.3255	12.7037	13.4447	13.6658	14.1931	14.3405	13.223	13.1332	13.6731	12.9343
LE01Gene00121	9.11956	9.39362	9.40886	11.3341	10.9082	11.3697	11.5165	10.665	11.4055	7.98523	7.64726	8.53611	9.78538	9.4306	9.05786	8.91324	9.4957	9.78021
LE01Gene00122	12.0836	12.0717	11.9804	11.685	11.8612	11.58	11.8125	11.7123	11.7984	12.38	12.3493	12.4501	12.3043	12.4303	12.6051	11.9834	12.2012	12.174
LE01Gene00123	6.86031	8.47365	8.46026	7.25665	7.71465	6.65845	7.70359	6.57974	7.20173	7.0555	7.53181	8.01816	8.51913	10.4296	8.43029	8.23823	10.461	7.1506
LE01Gene00124	10.7853	10.4589	10.8288	11.0133	11.0252	11.0469	11.3121	11.2279	11.1772	10.4729	10.4906	10.4262	11.2754	11.4255	11.2235	11.4829	11.4572	11.3193
LE01Gene00125	12.133	11.9816	11.6939	11.1389	11.4821	11.2388	11.202	11.6233	11.2569	11.7629	12.013	12.2132	11.5972	11.2995	11.8444	11.4973	11.2734	11.0894
LE01Gene00126	15.6486	15.5307	15.2899	14.2177	14.5064	14.2855	14.2814	14.5255	14.3434	16.0857	16.0477	16.2194	14.9961	15.188	15.8313	15.9827	15.0662	14.8626
LE01Gene00127	8.13837	8.64225	8.24351	9.20225	7.96149	8.96341	9.54048	6.98707	8.75783	9.20515	9.14633	9.44301	8.18525	8.41442	7.28482	7.3778	7.49525	8.41696
LE01Gene00128	13.1606	12.9852	13.1907	13.9488	13.7653	14.3431	14.2128	13.9059	14.2726	12.5482	12.8412	12.9719	14.3894	14.5765	14.4478	14.2111	14.3526	14.7734
LE01Gene00129	8.87605	9.73269	9.4841	10.2691	9.64368	10.0227	10.9189	9.68242	10.3077	11.2695	12.3281	12.363	11.8714	13.3365	12.6241	11.6488	13.343	12.5901
LE01Gene00130	10.7191	10.8895	11.815	13.9567	13.3542	13.6983	14.2636	13.428	13.6381	8.42895	9.14633	9.55172	12.2571	12.179	10.7856	10.69	11.6018	11.5766
LE01Gene00131	12.3236	12.1296	12.1042	11.1383	11.4999	11.0312	10.9234	11.3821	11.0141	12.5254	12.5677	12.656	11.7668	11.6329	12.1104	12.2514	11.4056	11.1731
LE01Gene00132	10.1077	10.6439	10.6187	11.2642	11.4245	11.3739	11.216	11.1835	11.1967	10.3333	9.91096	9.89674	10.7723	10.8562	10.914	11.083	11.1279	11.5681
LE01Gene00133	9.69664	9.56399	9.66152	10.1243	10.2213	10.086	10.1209	10.3999	10.0837	9.75162	9.70651	9.6779	10.0438	10.0276	10.0663	9.92124	9.9236	10.4326
LE01Gene00134	8.3159	8.77439	8.59875	9.65848	9.38437	9.90863	9.73992	9.47033	9.34916	8.13223	8.28658	8.00122	8.97044	9.46849	8.91081	9.16835	9.41625	9.77695
LE01Gene00135	10.5106	10.035	10.6735	11.4425	11.3726	11.5275	11.3761	11.1848	11.2429	10.2948	11.6544	11.3446	11.9238	12.6648	12.2537	11.5835	12.4252	12.0557
LE01Gene00136	11.0476	11.1188	11.0769	10.6787	10.5587	10.1967	10.3202	10.6659	10.3179	10.5079	10.3031	9.98267	9.43568	9.0436	8.90149	9.44332	8.69198	9.30583
LE01Gene00137	14.0127	13.9253	13.8285	13.9599	13.8133	13.9631	14.1685	13.9995	14.2597	13.5984	13.4039	13.5987	13.6378	13.5769	13.733	13.745	13.5191	13.7397
LE01Gene00138	10.88	11.0036	11.1964	10.9362	10.6216	11.0127	10.8504	10.3537	10.7412	10.2216	10.7048	10.0773	10.3891	10.4724	10.2646	10.2397	10.7697	10.6045
LE01Gene00139	10.7683	10.5947	10.6623	12.1664	12.0807	12.0263	12.2216	12.4326	11.9467	10.1359	9.8979	9.58432	11.6777	11.8467	11.1926	11.9047	11.9846	11.8672
LE01Gene00140	13.7144	13.247	13.5974	13.1593	12.7609	12.9334	12.4946	11.3966	12.7964	12.006	12.4429	12.3429	12.3585	11.6009	9.80156	11.2479	11.5208	11.5515
LE01Gene00141	10.5177	10.7023	11.315	12.6956	12.4082	12.5501	12.7367	12.272	12.8656	9.73692	9.71315	10.2629	11.9551	11.8284	11.6724	11.7936	11.816	11.9021
LE01Gene00142	10.8528	10.752	10.5371	11.1369	11.3008	11.111	11.5171	11.7257	11.1431	10.8337	10.9717	11.374	11.529	10.7994	11.4207	10.6315	10.5065	11.346
LE01Gene00143	12.8669	13.2716	12.8618	12.3932	12.8815	12.4069	12.5172	12.9779	12.4999	13.106	13.0513	12.8806	12.5766	12.7633	12.7063	12.3985	12.8154	12.4313
LE01Gene00144	11.9616	11.8664	11.7878	11.125	11.2651	11.0134	10.7554	11.6285	10.692	11.6476	11.6212	11.4576	11.1282	11.271	11.0146	11.141	10.7209	10.8687
LE01Gene00145	12.509	12.8457	12.6801	11.6292	11.7408	11.6914	11.4449	11.5188	11.6366	12.707	12.6366	12.358	11.6398	12.0609	12.0103	11.9675	12.2494	11.8463
LE01Gene00146	11.4566	11.2409	11.3486	10.9431	10.6753	10.7707	10.6482	10.5233	10.6134	11.6982	11.7747	11.7675	11.3539	11.2017	10.9899	11.4257	11.0628	10.8764
LE01Gene00147	12.307	12.6918	12.3752	11.2563	11.4343	11.0891	11.2248	11.4867	11.1381	12.6187	12.2256	11.9507	10.9763	11.0632	11.1702	11.2007	11.3347	11.1867
LE01Gene00148	10.7389	10.5575	10.4497	9.62865	9.92841	9.77542	9.55684	10.0553	9.52684	10.6842	10.2618	10.1999	9.80514	9.01424	9.36407	9.02897	9.01321	8.99631
LE01Gene00149	11.0141	10.9557	11.075	10.7462	10.9332	10.7316	10.6417	11.008	10.6792	11.0539	10.7238	10.4156	10.5933	10.5035	10.4476	10.9354	10.6241	10.7489
LE01Gene00150	8.54172	9.25571	8.81819	8.01887	8.47433	8.47307	7.23095	7.33255	7.989	8.32797	7.82331	7.48824	7.94346	7.57306	7.14442	8.17086	7.97347	7.92734
LE01Gene00151	13.8411	14.019	13.7998	13.0721	13.5197	13.141	12.9881	13.4984	13.0624	13.8478	13.8488	13.6821	13.1429	13.301	13.6571	13.2743	13.297	13.2294
LE01Gene00152	11.8269	11.6155	11.4936	10.772	11.0952	11.0456	10.8217	11.3282	10.9343	11.683	11.8456	11.7683	11.0463	11.0593	11.4819	11.5036	10.9244	10.7288
LE01Gene00153	11.8366	12.0077	11.7725	10.8969	11.365	11.1004	10.9404	10.9599	10.9143	11.0327	10.6906	10.9711	10.5162	9.99792	9.48129	10.2422	10.5033	10.3013
LE01Gene00154	12.9069	12.8619	12.4555	11.9419	12.2689	11.8573	11.8328	12.3118	11.7431	12.7229	13.0914	13.0902	12.5845	12.825	12.6827	12.115	12.4958	12.1873
LE01Gene00155	8.14756	7.90999	8.67137	7.82866	6.94558	8.35212	6.65078	7.36021	7.30794	8.60831	8.82626	8.36127	8.58389	8.40211	8.05777	7.50107	8.42514	8.39583
LE01Gene00156	11.7167	11.6797	11.8655	12.1316	12.0419	12.1154	12.0531	12.0401	11.9105	11.5094	11.3501	11.3124	12.1057	11.4768	11.6906	11.8431	11.3437	11.9125
LE01Gene00157	9.13119	9.72617	9.60702	9.87401	9.77704	9.82626	9.92415	9.93937	10.1352	9.96422	9.57599	9.69556	9.58377	9.95362	10.1006	9.96472	10.0415	10.0662
LE01Gene00158	11.883	12.0675	11.3646	9.28106	9.78163	9.39959	9.02976	9.64543	8.9733	11.7516	11.404	11.3441	9.05409	9.22463	9.53851	9.73285	9.34654	8.68069
LE01Gene00159	9.20784	8.70983	8.90289	8.64731	8.11508	8.33945	8.67893	8.11727	9.05793	9.75648	9.83079	9.91645	9.64743	9.2223	8.40414	9.48018	9.19874	8.91846
LE01Gene00160	11.3773	11.377	11.2086	11.1183	10.9523	11.1345	11.7118	11.016	12.3259	11.6974	11.5174	11.7405	11.0672	11.3431	11.4651	11.5436	11.7843	11.3995
LE01Gene00161	11.0707	10.9062	10.6887	9.28106	9.71591	9.45155	8.37063	9.39877	8.94724	11.4743	11.9511	12.0914	10.6219	10.5451	10.8851	10.8764	10.1133	9.21468
LE01Gene00162	12.2164	11.7339	12.3349	11.2342	11.6578	11.534	11.4035	11.9023	11.4829	12.8687	13.3882	13.3992	13.0928	13.6864	13.1123	12.9114	13.4719	12.2755
LE01Gene00163	12.3155	12.0399	12.1629	11.491	11.5497	11.551	11.7499	11.8536	11.695	12.5273	12.6461	12.4888	12.1686	12.1135	12.0404	12.3932	12.2567	11.5581
LE01Gene00164	12.1813	11.9198	12.1087	11.7894	11.796	11.7738	11.6445	11.7172	11.7043	11.8237	11.7373	11.6828	11.7979	11.4675	11.724	11.4877	11.2507	11.6828
LE01Gene00165	2.86776	0	1.899	3.50269	4.15375	3.52079	3.715	3.37314	4.06572	3.1319	4.03722	2.332	4.55198	4.41246	3.74362	3.53572	3.55385	2.99184
LE01Gene00166	11.1287	10.452	11.1879	12.5095	12.2025	12.5473	12.2161	11.9868	12.1846	10.559	10.5259	10.9941	12.6143	11.9742	12.4638	12.1531	11.5345	12.5169
LE01Gene00167	3.32179	3.52841	3.33607	5.1336	5.11265	5.25357	4.91248	5.5474	5.62532	3.28342	1.96011	0	4.23104	4.65312	5.25493	5.12562	3.90373	5.66327
LE01Gene00168	15.8093	15.6038	15.5924	15.7553	15.5974	15.8419	15.1531	15.647	15.2549	15.5884	15.8317	15.9498	16.0479	15.2174	15.8748	15.5155	15.0708	15.4511
LE01Gene00169	12.4811	12.6168	12.4944	12.847	12.9655	13.1226	13.3221	13.1168	13.3427	12.6269	12.6075	12.6088	13.0901	13.622	13.3753	13.2054	13.7301	13.5885
LE01Gene00170	0	3.11512	2.69133	1.61681	0	3.84152	3.24676	3.22051	0	0	3.27392	0	3.37258	0	2.35943	0	0	4.23909
LE01Gene00171	3.03549	4.4645	4.86816	3.36476	4.36452	3.3958	2.54912	3.04981	3.85761	3.1319	3.7578	5.68476	4.23104	5.12207	4.62977	3.24456	4.00374	3.99125
LE01Gene00172	13.9048	13.553	13.5648	13.8173	13.4096	13.8489	13.5764	13.2162	13.5532	13.2611	13.3412	13.2839	13.6167	13.2709	13.3104	13.0617	12.9555	13.5697
LE01Gene00173	10.5062	10.756	10.9163	11.6069	11.3812	11.7428	11.4617	11.0777	11.5847	10.3322	9.8625	10.185	11.1094	11.1699	11.1604	11.2654	11.6098	11.3327
LE01Gene00174	11.7008	11.3697	11.3334	11.2386	10.9291	10.8643	10.4194	10.7693	10.4066	11.283	11.2589	11.0515	10.5899	10.2443	10.9498	10.7002	10.7464	10.261
LE01Gene00175	10.0015	10.3708	10.3436	10.2149	10.6104	10.54	10.6427	10.7167	10.7478	9.04735	8.51276	8.85804	9.47605	9.49192	9.05506	9.5674	9.8749	9.57939
LE01Gene00176	9.68879	9.97581	9.86102	10.2435	10.3903	10.4446	10.1474	10.5881	9.96539	9.90994	9.59768	9.80047	9.62196	9.44268	10.1355	9.70747	10.0576	9.61456
LE01Gene00177	7.15264	7.60385	7.58548	9.61731	9.42411	9.74691	9.67931	9.15997	8.29824	9.34524	8.41024	8.67433	9.94729	8.8243	9.16558	8.70554	9.04877	8.69113
LE01Gene00178	9.4937	9.28259	8.6778	8.53924	8.24945	8.2788	8.31126	8.35582	8.75031	9.71209	9.64012	9.84546	8.1991	9.05937	7.76075	8.00222	8.39783	8.2761
LE01Gene00179	7.17077	6.52382	7.12202	8.29053	7.77121	8.46143	8.36533	7.91453	7.81258	6.79043	7.18533	6.67067	8.05933	10.1381	9.25366	8.57131	10.2933	9.53564
LE01Gene00180	9.3677	9.45792	8.92736	8.82219	8.5043	8.83388	8.84037	8.38304	8.36866	9.238	9.03413	8.77077	8.15716	8.71242	7.8603	8.71649	8.49555	7.91552
LE01Gene00181	8.69368	8.75532	8.82109	9.06423	9.03758	8.82785	8.85178	8.56046	8.88682	8.39191	8.05528	8.08935	8.91838	8.65478	8.88897	9.01722	8.84813	9.44806
LE01Gene00182	9.38139	9.58753	9.92992	10.7686	10.456	10.8239	10.8246	10.2638	10.6532	9.44103	9.03413	9.20978	10.7164	10.2105	10.1721	10.3539	10.2759	11.0213
LE01Gene00183	12.594	12.5274	12.3737	11.3711	11.7723	11.4322	10.9721	11.8398	11.3236	12.8434	13.1019	12.9972	11.9119	11.8539	12.3082	12.1615	11.5963	11.491
LE01Gene00184	14.7485	14.2376	14.3888	13.9441	14.1133	14.0328	14.0418	14.0644	14.0511	13.9932	14.3945	14.1401	14.2949	13.991	14.0973	13.9142	13.6134	13.6568
LE01Gene00185	12.0955	11.8402	11.7532	12.3341	12.2868	12.5281	12.8863	12.6809	12.972	12.0826	12.371	12.3345	12.9217	13.2785	13.0592	13.6961	13.6325	13.261
LE01Gene00186	11.7457	11.4647	11.1879	10.2124	10.2514	10.1814	9.85022	10.254	10.0273	11.7278	11.9721	12.0844	10.921	10.8704	11.2166	11.2716	10.8424	10.0378
LE01Gene00187	11.9571	11.8866	11.3435	12.2772	12.0884	12.3934	12.4145	12.2392	12.5364	11.7377	11.8747	11.7095	11.7587	11.6943	11.9611	12.1112	11.8918	12.4697
LE01Gene00188	10.8868	10.7656	10.7886	9.77027	9.88493	9.95782	9.8728	9.74846	9.82396	10.8113	10.5914	10.5084	9.65415	9.37919	9.86685	9.50354	9.30548	9.38942
LE01Gene00189	11.6399	11.8043	11.5251	11.1729	11.4684	11.4237	11.4667	11.9576	11.0913	11.9437	11.5348	11.6806	11.3477	11.8414	11.4598	11.7167	12.1996	11.5648
LE01Gene00190	11.8259	11.7122	11.6823	11.8669	11.8503	11.8322	12.002	12.1832	11.8833	11.1476	11.1585	11.2611	11.6872	11.7637	11.6545	11.8331	11.6266	11.9843
LE01Gene00191	8.05784	8.14787	7.83006	7.87386	7.11056	7.52268	6.20538	6.68558	6.23323	8.41261	7.94113	8.46376	7.7994	6.53624	6.58539	6.29205	6.56182	7.05682
LE01Gene00192	8.44817	8.13809	8.65193	8.46523	7.79566	8.0334	8.44283	8.29022	8.54843	9.7581	10.6813	10.8829	10.2717	11.3133	11.0453	10.2384	10.8766	10.3765
LE01Gene00193	12.5775	12.6192	12.5498	11.9059	11.8831	11.7675	11.8111	11.653	11.6713	12.8775	12.7164	12.8157	12.0283	11.9248	11.9589	11.7996	11.6538	11.6693
LE01Gene00194	8.76106	8.75212	9.0513	9.24219	9.17902	9.39552	9.35515	9.08735	9.36155	8.73204	9.0604	8.52825	9.36579	9.37919	8.99792	9.19468	9.43876	8.74557
LE01Gene00195	6.88249	6.00523	6.80738	4.95285	5.68364	6.72491	4.91248	6.51558	5.55803	5.00287	4.40847	0	5.95006	5.08147	5.71825	5.91516	4.95806	5.63471
LE01Gene00196	11.7024	11.7097	11.8066	11.6668	11.8997	11.8048	11.5531	11.9325	11.591	11.9526	11.9961	11.9157	11.939	12.0222	11.8792	12.1461	11.882	11.8401
LE01Gene00197	10.3813	10.6473	10.4922	10.7923	10.9892	10.8768	11.121	11.0736	11.0987	10.6533	10.5659	10.631	11.1575	11.0639	10.9965	11.0203	10.8004	11.2386
LE01Gene00198	12.0899	12.1763	12.2069	12.5353	11.8066	11.9862	12.5467	11.297	12.4295	9.93305	10.2412	9.59753	10.178	10.3885	9.45392	9.40098	10.1147	10.8764
LE01Gene00199	10.7846	10.3708	11.3631	11.5764	11.2212	11.4878	12.0531	11.0124	12.041	10.8482	11.4692	11.7595	12.7815	13.3135	12.5406	11.863	12.9714	12.7667
LE01Gene00200	10.6375	10.9212	10.4241	10.5632	10.5782	10.494	10.5336	10.0915	10.3293	10.928	10.4183	10.4482	10.7172	10.7007	10.704	10.732	10.8458	10.9266
LE01Gene00201	10.569	11.0559	10.6517	9.97228	9.86485	9.77855	9.98586	9.50172	9.92423	10.6287	10.5932	10.2805	9.59254	9.77577	9.50199	9.82844	10.1922	9.79319
LE01Gene00202	11.2929	11.2607	11.0374	10.6116	10.5022	10.3842	10.5313	10.5596	10.6299	11.3015	11.1904	11.1399	10.4684	10.4655	10.6779	10.4652	10.5412	10.447
LE01Gene00203	10.1218	10.3466	10.3304	11.41	11.484	11.8098	11.5995	11.7132	11.4903	10.2518	9.69314	9.72681	10.8628	10.8211	10.5555	10.4983	10.6771	11.431
LE01Gene00204	9.82098	9.92695	10.2367	11.0291	10.5667	10.8102	11.2531	10.7881	11.2701	10.1593	9.88178	9.79556	10.3073	10.56	10.4336	10.5944	10.4231	10.639
LE01Gene00205	12.6664	12.7419	12.1692	10.7453	11.0394	10.6041	10.0827	11.1848	10.5841	12.7319	12.4586	12.4246	10.9028	10.6796	11.2041	10.9958	10.4904	10.6444
LE01Gene00206	9.46091	9.63002	10.3212	11.6773	11.0259	11.4647	11.8086	11.1796	11.5709	7.27935	6.09708	6.5516	9.27935	9.60007	9.81816	10.2283	9.98454	9.85795
LE01Gene00207	12.6718	12.1431	12.6075	13.025	12.8515	13.0148	12.663	12.692	12.5979	12.2339	12.1829	12.1869	12.7115	11.7169	12.1305	12.2379	11.2532	12.652
LE01Gene00208	9.87313	9.78062	9.99954	10.1256	9.70627	9.79256	10.2981	10.0354	10.3025	9.44505	9.45839	9.20238	8.64249	8.34322	7.94135	9.06653	8.30776	8.84555
LE01Gene00209	10.138	9.94669	10.1165	11.8601	11.1026	11.2077	11.471	10.4066	11.1581	9.57926	10.8077	10.8914	11.0335	10.9835	9.67238	10.7658	10.6348	10.9449
LE01Gene00210	6.84909	7.17702	7.11257	5.85403	5.18845	5.99701	6.02899	5.48176	6.52513	6.90002	7.2137	6.93134	6.09535	6.7194	6.78776	6.21182	6.83051	6.52992
LE01Gene00211	11.4432	11.2454	11.3283	11.2416	11.089	11.3276	11.6817	10.9447	11.7652	11.1433	11.1083	11.9085	11.2485	11.43	11.7983	11.4368	11.379	11.3366
LE01Gene00212	11.4192	11.5377	11.4623	11.442	11.6977	11.4797	11.7034	11.7753	11.5602	11.2051	11.167	11.0342	11.3749	11.2884	11.3932	11.4196	11.5721	11.5695
LE01Gene00213	9.89648	10.0124	10.2486	10.9263	10.6687	10.887	10.9955	10.5793	10.5799	10.4217	9.96759	10.5909	10.8779	10.8711	11.1135	10.6761	10.9108	11.3857
LE01Gene00214	9.12887	9.29805	9.09035	7.60951	7.67567	7.39786	6.84599	7.08978	6.76779	9.38558	9.44249	9.67968	6.57756	6.39427	6.40372	6.6527	6.33101	5.34845
LE01Gene00215	10.8737	10.623	10.4618	10.4105	10.2437	10.4525	10.1884	10.5315	10.2151	11.0333	11.0267	11.3049	10.8201	10.6214	11.1114	11.0077	10.4477	10.4825
LE01Gene00216	12.1793	12.4723	12.4897	10.2883	10.2392	10.1755	9.29512	9.56252	9.31645	11.6402	11.5864	11.5337	10.0654	9.35597	9.3251	10.5745	9.1748	8.78835
LE01Gene00217	14.7825	14.1659	14.8614	15.2899	14.9646	15.262	15.0167	14.8123	14.887	14.1027	14.3014	14.7407	15.5856	15.019	15.3277	15.319	14.7894	15.2232
LE01Gene00218	10.1253	10.1647	10.2529	11.4377	11.076	11.2669	11.0083	10.7838	11.0071	9.61899	9.15123	9.33899	10.6749	10.294	10.2353	10.6392	10.6033	10.8346
LE01Gene00219	12.8957	12.7568	12.4741	11.9221	12.3088	12.012	12.1583	12.4778	12.1392	12.911	12.8703	12.7247	12.0012	12.1748	12.2719	12.1521	12.2668	12.0933
LE01Gene00220	11.7548	12.1458	12.3713	12.8867	13.0032	13.0935	13.1091	12.8237	13.4131	13.7365	12.7537	14.7113	15.7562	16.2287	16.7984	17.0299	17.0707	16.1891
LE01Gene00221	12.3778	12.2288	12.2651	12.0688	12.1457	12.1035	12.0286	12.0233	12.0259	12.4704	12.6383	13.0809	13.0372	12.7403	13.063	12.6936	12.5673	12.5768
LE01Gene00222	10.1077	9.75045	9.71091	9.47371	9.56942	9.46522	9.87839	9.6806	9.67114	9.89089	9.61019	9.92396	9.86861	9.33453	10.0801	9.86332	9.22229	9.70148
LE01Gene00223	10.551	10.3413	10.3191	10.4516	9.99722	10.179	10.517	10.0694	10.635	10.1519	10.1585	10.1762	10.5263	10.489	10.2695	10.7075	10.3726	10.0364
LE01Gene00224	8.86774	9.0071	8.7251	8.66578	8.24502	8.4219	7.94999	8.18071	8.13467	8.14218	8.13657	7.68494	8.88735	8.8727	8.5142	9.05795	8.66168	8.39157
LE01Gene00225	8.94617	8.86907	8.69374	10.366	9.94763	10.3404	10.6395	9.78464	10.5714	8.62615	8.49745	7.98981	9.95547	10.0541	9.27065	10.7587	10.537	10.2303
LE01Gene00226	11.1505	11.6805	11.2019	10.8945	10.8245	10.562	10.0098	9.95608	10.287	10.9143	10.7842	10.7675	9.734	9.49192	9.79989	10.085	9.93947	10.2469
LE01Gene00227	6.40414	6.24278	3.19985	6.94194	9.42998	5.01942	6.76784	7.07873	4.91848	5.65843	4.64909	4.767	6.22733	3.41473	5.56929	8.10575	3.90373	10.5327
LE01Gene00228	8.63284	8.86611	10.2236	14.4581	13.5844	13.912	12.1663	11.0095	13.5555	7.67846	6.99137	7.692	8.67918	8.89043	8.33198	11.9142	10.2557	14.5042
LE01Gene00229	10.4927	10.7351	9.78271	9.8435	10.7428	10.0923	9.8215	11.6488	10.1119	10.8081	10.5832	10.5652	10.2825	10.5015	10.7932	10.0638	10.4828	10.7203
LE01Gene00230	13.4292	14.3111	13.1865	11.2829	11.1561	11.3893	11.2013	11.3525	11.5629	14.2492	14.7032	14.3345	12.8349	13.2027	13.2751	12.199	12.9698	12.6507
LE01Gene00231	11.609	11.6378	11.3283	10.7566	10.4675	10.6407	10.1551	10.6065	10.3543	11.582	11.852	11.4571	10.7567	10.7107	10.3742	10.6325	10.6003	10.1743
LE01Gene00232	9.0889	9.19805	9.42422	10.2691	9.7207	9.98249	10.1974	9.64917	9.95725	9.12715	9.18027	9.21468	9.48738	9.81963	9.57804	9.68722	10.1519	9.82357
LE01Gene00233	6.01999	6.08884	5.95326	5.85403	5.80902	6.50046	6.89092	6.22594	6.88225	5.24367	5.47131	5.14151	5.90571	6.83382	6.04601	7.02555	6.76075	6.34833
LE01Gene00234	12.5946	12.4586	12.3723	11.2545	11.551	11.0752	10.7715	11.2497	10.6871	12.812	12.8414	12.7968	11.4287	10.733	11.533	11.573	10.9036	10.5113
LE01Gene00235	9.3988	9.76323	9.99182	10.4138	10.2525	10.4505	10.5858	10.008	10.9426	10.3918	10.4848	10.4188	11.1504	12.1254	11.3448	11.5655	12.5472	11.9295
LE01Gene00236	10.3939	10.416	10.1058	9.45684	9.27125	8.92717	9.15478	9.42739	9.29336	10.1458	10.042	10.8045	9.50421	9.25461	9.83131	9.55119	9.21709	9.42113
LE01Gene00237	14.7417	14.9245	14.8537	14.8721	14.3641	14.6833	13.8096	13.6156	14.032	14.9963	14.6901	14.5922	14.362	13.5518	13.8265	14.251	13.9214	14.0103
LE01Gene00238	12.0074	11.8308	12.255	11.8285	12.1382	11.9536	12.1522	12.1049	12.0571	11.8592	11.8699	12.1492	12.1091	12.3768	12.1679	12.2673	12.3145	12.1376
LE01Gene00239	10.2295	10.0415	10.4794	9.9841	10.2258	10.1148	9.8215	10.0095	10.3293	10.3538	10.3443	10.2887	9.86861	10.0422	9.58776	9.989	9.8782	9.80766
LE01Gene00240	10.3518	10.0905	10.2159	8.89604	8.82246	8.58466	8.06556	8.2365	7.84823	10.5701	10.4672	10.0529	8.99974	8.11583	8.66866	8.96617	8.38861	8.32161
LE01Gene00241	12.3233	12.4779	12.4592	11.4977	11.69	11.5916	11.3728	11.6118	11.5193	14.93	14.9405	16.509	15.8291	15.9163	17.5197	16.8409	16.0561	15.575
LE01Gene00242	11.7082	12.1709	11.7368	10.6567	10.8539	10.4397	10.2371	10.4955	10.6329	12.0683	11.5451	11.5762	10.381	10.4306	10.4824	10.5553	10.8117	10.148
LE01Gene00243	10.5605	10.1057	10.2475	9.8756	9.97865	9.99601	10.1854	10.4307	10.0304	10.2484	10.3206	10.3049	10.0866	9.68043	10.25	10.2308	9.57912	9.585
LE01Gene00244	10.0066	9.90549	9.9513	10.6548	10.4142	10.5186	10.7745	10.6548	10.8594	11.5496	11.3926	13.3476	12.0062	11.6825	14.0989	13.2162	12.3464	11.7908
LE01Gene00245	10.0744	10.2271	9.89588	9.82225	9.70466	9.02009	9.45828	9.68789	8.91399	8.95159	9.27083	8.74387	7.6794	8.12585	6.74672	7.89069	8.3416	7.33057
LE01Gene00246	8.834	8.54939	8.58172	9.95436	9.84449	10.1635	10.2898	9.91159	10.517	9.19802	9.3666	9.73195	10.8489	11.2437	10.6345	11.202	11.3449	11.2457
LE01Gene00247	10.0574	10.0598	10.5166	10.8427	10.5207	10.91	11.1705	10.7494	11.2261	10.2598	10.4395	10.6208	11.6645	12.0729	11.696	12.0699	12.2731	11.5303
LE01Gene00248	11.8017	11.6644	11.6203	11.2715	11.4087	11.2989	11.6135	11.5784	11.4583	11.9851	11.9188	12.2711	11.5837	11.5111	12.0904	11.7071	11.549	11.5892
LE01Gene00249	11.0525	11.4569	10.7225	10.0276	9.72389	9.91576	10.2981	9.53244	9.92757	12.0005	11.7656	11.5782	9.78997	10.1132	9.86845	9.69277	10.2821	10.1018
LE01Gene00250	12.2101	11.8398	12.0844	11.4398	11.6022	11.2907	11.1651	11.5606	11.3734	12.2689	12.3715	12.4068	11.8725	11.9437	12.2399	12.0473	11.8857	11.2255
LE01Gene00251	8.77891	9.66619	8.86679	6.97787	6.86702	7.44594	7.37498	6.53189	7.70783	9.12465	9.03677	9.30488	7.1622	6.69269	7.0576	7.15991	7.33168	6.51433
LE01Gene00252	10.8394	10.6473	10.6808	11.1028	10.9339	10.9886	11.1366	11.3194	10.6552	10.3516	9.98553	10.2159	10.7371	10.6761	11.0382	10.723	10.6714	10.9028
LE01Gene00253	6.01999	6.73318	7.08383	8.3961	8.3395	8.75656	8.01232	7.38736	8.36866	6.6158	6.40661	6.52024	8.58036	8.68896	8.19631	7.95987	9.27077	10.3701
LE01Gene00254	14.7381	14.4272	14.3428	13.3704	13.9608	13.2557	13.3239	14.2498	13.1669	15.0487	15.5799	15.4896	13.8945	14.1248	13.8292	13.0515	13.5974	12.8176
LE01Gene00255	7.38009	8.37717	8.14029	9.62865	9.4723	9.48069	9.25844	8.70411	9.05489	7.40861	6.64753	7.01248	8.16188	7.54347	7.98905	7.85151	8.14207	8.38301
LE01Gene00256	11.709	11.6404	12.3973	13.4483	13.2419	13.4752	13.4717	13.2437	13.3722	11.6154	11.3634	11.7939	13.324	12.9747	12.9326	12.7419	12.7136	13.5044
LE01Gene00257	11.5016	11.4205	11.27	11.0205	10.7584	11.1073	10.8532	10.9779	10.8214	11.6296	11.7247	11.9823	11.4859	11.1468	11.5893	11.4196	11.1989	10.9843
LE01Gene00258	10.6848	10.9026	10.6253	11.0524	11.1806	11.1873	11.7696	11.4608	11.8295	11.2684	10.9971	11.1309	11.4957	11.9223	11.532	11.3522	11.9646	11.7384
LE01Gene00259	10.5536	10.3122	10.495	11.2763	11.1154	11.0841	11.3279	11.1725	11.3179	9.90264	9.7652	9.73024	10.5705	10.8771	10.4582	10.6677	10.6847	10.7835
LE01Gene00260	13.4072	13.3533	13.5295	13.0828	13.0682	13.2449	13.3056	13.1518	13.0487	13.7217	13.8049	13.9852	13.6997	13.7236	13.5898	13.8108	13.8123	13.2205
LE01Gene00261	5.91632	5.39907	6.4044	7.98984	6.39341	8.35212	8.90021	6.92667	9.28037	4.60275	5.0774	4.09931	8.62891	9.50157	7.43015	9.61497	9.75446	8.14045
LE01Gene00262	10.775	10.8078	10.6044	9.94984	10.194	9.93835	10.152	10.3294	10.1876	10.6731	10.2538	10.2196	9.76536	9.74197	9.84271	10.1511	10.0401	9.54527
LE01Gene00263	10.7106	10.4549	10.8588	10.6145	10.6612	10.5289	10.8645	10.7424	10.8374	11.0722	11.7648	11.8478	11.8186	12.0842	11.8953	11.5497	11.7688	11.2427
LE01Gene00264	12.6855	12.6117	12.8496	13.0048	12.9015	13.0025	13.1266	12.7611	13.0719	12.5096	12.2917	12.3968	12.7238	12.6935	12.6015	12.5858	12.5986	12.9073
LE01Gene00265	9.60625	10.1574	9.62874	10.3626	10.3762	10.4357	9.89687	10.0426	10.1352	9.87457	9.56134	9.52234	9.95818	9.5692	9.81486	9.85013	9.9172	10.3819
LE01Gene00266	12.2237	11.7872	12.043	10.9551	11.4722	11.0469	10.9695	11.3776	11.0352	12.1736	12.4289	12.4908	11.6786	11.8782	11.9689	12.0502	11.7483	11.2327
LE01Gene00267	11.9577	11.3755	11.3344	11.1014	11.3051	10.9777	10.857	11.4193	10.9492	11.4958	11.6181	11.078	11.014	10.8569	10.6307	11.1342	10.7829	10.5709
LE01Gene00268	7.60347	8.32641	7.93032	8.25681	8.55172	8.7015	8.66175	8.85108	9.14362	7.44121	7.50144	7.26043	7.33101	8.2952	8.10183	8.22296	7.65759	8.51425
LE01Gene00269	11.9639	11.7407	11.6373	10.8977	11.0565	10.9879	11.0193	11.3375	10.9235	12.1192	12.0334	11.7418	11.2601	11.4846	11.3465	11.4202	11.3123	11.2309
LE01Gene00270	10.7298	10.9417	11.2528	11.2355	11.9138	11.5344	11.9454	12.1121	11.8738	13.084	13.6454	13.5773	13.6304	14.7003	14.1519	12.8039	14.2397	13.8162
LE01Gene00271	11.9193	11.7363	11.7654	10.5333	10.6637	10.5501	10.24	10.0721	10.2935	12.4729	12.7442	12.7952	11.4516	11.2135	11.3976	10.9447	11.0978	10.3383
LE01Gene00272	10.2805	9.84516	10.4674	11.5548	11.3563	11.6701	11.6865	11.5571	11.5165	9.85656	9.91672	10.0787	11.8338	11.5025	11.5082	11.6464	11.2608	11.8556
LE01Gene00273	10.458	10.7237	10.53	10.0418	10.1532	10.335	10.0384	10.2963	10.0289	10.5664	10.3357	9.97835	9.9609	9.59106	10.0339	9.99949	9.87325	10.2504
LE01Gene00274	9.82957	9.54746	9.91504	10.6343	10.6453	10.7316	10.6162	10.448	10.5671	9.59564	9.05519	8.74387	9.74819	9.24085	8.97737	9.86332	9.25564	9.38085
LE01Gene00275	10.635	10.4261	10.5049	10.5592	10.8583	10.639	10.5744	10.4799	10.5181	10.3125	10.0564	10.014	10.216	9.68721	10.0225	9.96166	9.54425	10.0608
LE01Gene00276	12.7134	12.5566	12.0208	10.9016	11.5416	10.8709	10.944	12.0362	11.0823	12.9141	12.6809	12.4516	11.1155	11.0074	10.9016	10.9747	10.9268	10.8809
LE01Gene00277	16.143	15.9382	15.5588	16.1213	16.0123	16.0277	16.1046	15.8611	16.3145	15.88	15.8711	15.9939	15.7236	15.5602	15.808	16.1256	15.5001	15.7067
LE01Gene00278	11.6227	11.3024	11.2042	13.096	12.5586	12.6608	12.9195	12.3739	12.4142	10.5242	9.72634	9.98555	11.3315	10.9501	10.7618	10.4532	11.054	11.8718
LE01Gene00279	10.4216	10.5529	10.8151	10.8867	11.0989	11.0312	11.1651	11.3427	11.1911	10.5838	10.3325	10.6519	11.1179	11.1106	11.6401	11.0595	11.075	11.0847
LE01Gene00280	10.1241	10.3635	10.2679	10.0319	9.95171	10.0986	10.2167	10.4714	10.3293	10.1605	9.99101	9.61989	9.94043	9.88006	9.64844	9.70564	10.0807	10.1556
LE01Gene00281	12.7257	12.9415	12.8528	11.9446	12.1442	12.0315	11.8721	12.1646	11.8165	12.65	12.4083	12.2175	11.9088	11.8064	11.6865	11.8572	11.9773	11.9769
LE01Gene00282	11.7194	11.417	11.4426	11.1062	11.2475	11.2841	11.3701	11.638	11.2193	11.6314	11.8725	11.6573	11.5458	11.7709	11.6113	11.4808	11.6809	11.4434
LE01Gene00283	11.3448	11.0224	11.489	11.4966	11.8976	11.7469	11.3428	12.0557	11.8712	11.2175	11.1165	11.0467	11.5148	11.5488	11.5624	11.7388	11.0743	11.0854
LE01Gene00284	11.3924	10.973	10.9068	11.1495	11.3792	11.0417	11.2481	11.7923	11.1939	10.8329	10.7716	11.0342	11.0476	10.9515	11.3006	11.4728	10.7062	10.9043
LE01Gene00285	10.0647	10.2958	10.3016	10.4695	10.4191	10.3656	10.6162	10.511	10.3727	9.9041	9.54282	9.85177	9.68071	10.0115	9.94149	9.64009	10.0401	10.0075
LE01Gene00286	7.92525	8.43423	7.39585	8.53924	8.08067	8.58108	8.92563	8.3187	8.76157	9.8505	9.66602	9.93292	9.38206	9.16758	9.00663	8.55107	8.87479	9.13279
LE01Gene00287	10.5733	10.4716	10.2911	9.68045	10.0928	9.51866	9.59808	10.2001	9.21907	10.453	10.7443	10.0196	9.3861	10.1069	9.25854	9.06938	10.0533	9.24807
LE01Gene00288	11.0549	11.2062	10.7677	9.94077	10.2701	10.0835	10.1318	10.6247	9.97992	11.3473	11.3681	11.0827	9.71485	9.8365	10.3005	10.1307	9.63477	9.78834
LE01Gene00289	10.7638	10.7908	10.6069	9.39617	9.62675	9.44762	9.11114	9.96362	9.39808	11.0273	11.2372	10.9573	10.0348	10.6495	10.5295	10.0261	9.85997	9.78834
LE01Gene00290	9.33389	9.40793	9.48959	11.2317	10.6653	11.1345	11.0485	10.7078	10.9434	9.04735	8.58332	8.87364	10.688	10.5451	10.6354	10.2498	10.5822	10.868
LE01Gene00291	11.1833	11.1256	10.7495	11.384	11.2207	11.2233	10.8636	11.0575	11.1017	9.32354	9.25271	8.96966	9.79453	10.4536	9.95357	10.5634	10.8407	10.6604
LE01Gene00292	5.85035	5.96154	5.48133	12.1323	9.11733	8.67148	12.4151	11.4683	12.4162	5.16778	5.85436	5.65619	6.47506	7.2272	9.82146	7.60682	6.94815	12.6366
LE01Gene00293	12.1514	11.5911	12.0738	12.299	12.1722	12.1875	12.0625	12.2653	12.0673	11.928	11.9852	12.083	12.3875	12.2853	12.3706	12.4307	12.0078	12.2816
LE01Gene00294	9.00041	8.48526	8.88634	9.98998	9.58703	10.0771	9.90236	9.95003	9.87324	8.73533	8.84149	8.56329	10.0904	9.55444	9.60508	9.90378	9.19081	9.68416
LE01Gene00295	9.32582	9.00441	9.27965	9.75309	9.4704	9.93835	9.37374	9.65849	9.66915	8.41671	8.18036	8.38323	9.36579	9.29513	9.07178	9.35035	9.08061	9.67893
LE01Gene00296	12.1777	11.9627	11.7878	10.9966	11.1525	10.9221	11.0526	11.3843	10.8612	12.2746	12.5493	12.3115	11.6393	11.4461	11.4798	11.5497	11.2347	10.7908
LE01Gene00297	10.6545	11.1891	10.7594	9.30247	9.80138	9.18263	8.93281	9.24652	8.91062	10.8066	10.326	9.91494	8.79312	8.59473	8.4978	8.51391	8.7106	8.33054
LE01Gene00298	11.3778	11.0771	10.9769	10.0404	10.3309	10.1333	9.91692	10.2892	10.0763	11.067	11.3602	10.9507	10.1522	9.77577	10.4042	10.6695	9.81422	9.47449
LE01Gene00299	11.0384	10.76	11.0001	10.5403	10.7608	10.7785	10.8915	10.9186	10.8939	10.6723	10.5146	10.7043	10.4798	10.5728	10.882	10.6733	10.5339	10.3603
LE01Gene00300	13.4131	13.6655	13.6675	11.8981	12.2022	12.2294	11.7815	12.0511	11.797	13.7437	13.6286	13.2739	12.1488	12.2393	11.6274	11.587	12.1335	12.3717
LE01Gene00301	12.3996	12.341	12.3046	11.2817	11.6155	11.2456	11.2737	11.5803	11.3892	12.4104	12.5055	12.3172	11.5898	11.9455	11.8649	11.7767	11.7071	11.2416
LE01Gene00302	7.5833	7.52349	8.12626	11.1527	10.7491	10.4623	11.8295	10.435	10.4006	9.96563	8.70491	8.51239	10.1246	10.8494	9.09921	9.48446	10.6484	10.9801
LE01Gene00303	12.6488	12.7105	12.7283	13.0239	12.5768	12.8083	12.8216	12.5599	12.7909	12.397	12.3541	12.3876	12.5392	12.6344	12.4231	12.3624	12.795	12.7605
LE01Gene00304	10.8479	10.8171	11.2241	10.3829	10.4675	10.2199	9.83113	10.3456	10.397	10.9795	10.8146	10.4524	10.1873	10.2727	10.1473	10.0129	10.3478	9.81881
LE01Gene00305	6.5359	7.35642	5.67361	5.71902	4.22748	4.63305	5.35879	5.57914	5.07108	8.02341	7.786	7.36123	5.99308	6.95114	6.74672	6.62198	6.16813	6.20025
LE01Gene00306	9.67139	10.3284	9.83969	7.89906	8.76791	8.82178	7.72856	8.82815	8.26698	10.8626	10.3453	10.9134	9.16407	9.05151	9.41298	8.84506	9.17748	8.87027
LE01Gene00307	8.56932	9.08042	8.81527	7.67663	7.90643	7.9854	7.56258	7.35105	7.80535	9.14705	9.20875	8.82312	8.22189	8.47445	7.71183	7.7415	8.28806	8.37871
LE01Gene00308	9.24254	9.46772	9.34772	9.94531	9.43971	9.19441	10.1114	9.38313	9.01153	9.0287	9.13648	9.61062	9.48361	8.30405	9.01242	8.81482	8.46517	11.477
LE01Gene00309	11.4818	11.7241	11.1624	9.08634	9.93668	8.63738	8.87434	9.89278	8.46823	11.9458	11.4794	11.2104	8.3349	7.9453	8.66132	8.6982	8.08613	8.12513
LE01Gene00310	9.7817	9.891	9.4638	8.64358	9.50045	9.1779	8.86311	9.85114	9.05183	10.1221	9.97728	9.88908	8.86437	8.92527	9.51834	9.51403	8.51263	9.2243
LE01Gene00311	11.0141	10.8953	10.4403	9.44832	9.39241	9.51303	9.34979	9.6529	9.73917	11.3328	11.6587	11.5109	10.7998	11.2884	10.9415	10.9556	10.7697	9.97652
LE01Gene00312	10.5978	10.4341	10.4107	9.74094	9.78316	9.78946	10.135	9.71314	9.85933	10.1788	10.0127	10.2474	9.58024	9.32587	9.54252	9.84515	9.06622	9.05408
LE01Gene00313	12.4099	12.6712	12.3802	10.9294	11.3194	11.0351	10.6218	11.1938	10.8716	12.9434	12.7137	12.7572	11.5129	11.5101	11.9841	11.5375	11.1723	11.2129
LE01Gene00314	10.4469	10.5947	10.5677	10.7199	10.7054	10.6234	10.7884	10.6705	10.888	10.1507	9.95504	9.97257	9.85555	9.98009	10.2116	10.0934	10.0663	9.85331
LE01Gene00315	10.3408	10.0442	10.0926	9.65293	9.7585	9.75489	9.52631	9.7744	9.3139	10.2063	10.314	10.2293	10.0692	9.59647	10.3505	10.0892	9.72179	9.56811
LE01Gene00316	10.6301	10.4549	10.3617	10.1189	10.2917	10.1247	10.4181	10.3977	10.3305	10.6774	10.6392	10.6447	9.9784	9.91514	10.5174	10.4157	9.99064	9.69804
LE01Gene00317	9.92881	10.4251	10.2432	10.384	10.4967	10.2995	10.5675	10.4469	10.6732	10.1208	9.89206	9.84546	9.86427	10.3356	9.99942	10.1307	10.66	10.2656
LE01Gene00318	11.5296	11.2747	11.0573	9.94228	10.5344	9.88702	9.6857	10.6724	10.1623	11.5213	11.5026	11.2611	10.417	10.3247	10.3436	10.3232	10.0992	9.75056
LE01Gene00319	8.10575	8.29154	7.69088	6.31369	6.44068	5.97533	6.40446	5.8887	5.65782	7.28834	7.20431	6.16215	6.79982	6.82155	5.3675	5.66696	5.80205	6.01318
LE01Gene00320	8.85378	9.28702	8.29038	8.68764	8.37643	8.63738	8.4874	8.43166	8.82018	8.54223	7.97468	8.4304	8.58389	9.78686	9.04099	8.3549	9.31525	8.25279
LE01Gene00321	12.0432	12.5495	12.452	12.1845	12.2637	11.947	12.112	12.0315	12.1087	11.7455	11.3459	11.2498	11.4233	11.3922	11.1572	11.6262	12.1307	11.5605
LE01Gene00322	9.72759	9.527	10.1981	14.7917	13.7762	14.5364	15.5671	13.5511	15.1663	9.24494	8.68478	8.443	13.2939	12.519	11.5194	12.0973	12.2065	13.6193
LE01Gene00323	12.6841	12.4586	11.9509	11.9105	11.5479	11.8573	12.0374	11.5516	12.0869	12.8291	12.9966	12.8165	12.2917	11.8693	11.8529	12.2605	11.7465	11.8745
LE01Gene00324	13.7023	13.6958	13.8631	14.71	14.4496	14.6563	14.4327	14.1563	14.2261	13.4067	13.1875	13.3654	14.5558	14.088	14.2232	14.1293	14.016	14.7749
LE01Gene00325	10.4225	10.1586	10.3516	9.24711	9.68025	9.23374	8.45784	9.7362	8.93403	10.1848	10.2169	10.0377	9.46272	8.80884	9.47711	9.74893	8.4161	8.92438
LE01Gene00326	9.35586	9.3349	9.26052	8.76165	9.17902	9.01213	9.11745	9.40321	9.21362	10.038	10.0114	10.6428	9.74662	9.65472	10.1074	9.80982	9.24801	9.50045
LE01Gene00327	10.4927	10.5147	11.0714	10.6306	12.1968	10.7517	11.0427	12.5594	11.0141	9.85353	8.87741	9.20732	9.43763	9.63556	9.14204	9.56538	10.0148	9.19525
LE01Gene00328	10.4206	10.4657	10.641	10.6353	12.4736	11.2484	11.7605	13.1723	12.0939	9.974	8.46241	9.16484	10.9804	11.2005	10.9573	10.5482	11.3935	10.0966
LE01Gene00329	11.4658	11.5726	11.7631	12.0566	13.0803	12.5565	13.0116	13.7603	13.3613	11.4017	10.0591	10.8431	12.1551	12.4576	12.3653	12.1571	12.566	12.0601
LE01Gene00330	9.14272	9.54376	9.3855	10.1149	10.0439	10.091	10.9528	10.9934	10.9293	9.56823	9.61729	9.60689	9.45504	9.60545	9.60891	9.9291	9.61909	10.4795
LE01Gene00331	11.6423	11.6948	11.1846	10.5553	10.6156	10.5326	10.3106	10.4661	10.3493	11.8535	11.9797	12.1903	11.1838	11.0781	11.5148	10.8167	10.8667	10.8641
LE01Gene00332	10.4073	10.0323	10.5686	13.8358	13.1479	13.6388	14.4654	13.5541	14.5114	10.443	10.7434	11.3129	13.8656	13.9544	14.0029	14.1405	14.05	14.9659
LE01Gene00333	9.99646	10.54	10.3191	10.4258	10.1124	10.1944	10.446	10.1134	10.5607	10.4729	10.2251	10.3712	9.87293	9.84411	10.0282	10.0652	9.97994	10.8463
LE01Gene00334	12.8106	12.4061	12.7399	12.2679	12.3021	12.1802	12.6108	12.5335	12.475	12.6699	12.851	12.703	12.3832	12.1282	12.1993	12.3645	12.0986	11.8255
LE01Gene00335	10.4617	10.031	10.1891	10.4611	10.21	10.6595	9.88581	10.1242	9.98633	10.3376	10.6931	11.0112	11.3845	10.5526	11.1728	10.8452	10.0474	10.9963
LE01Gene00336	11.4063	11.1391	10.8588	10.3131	10.2008	10.2428	9.43823	10.0553	10.0289	11.0942	11.2075	11.2776	10.5942	10.2705	10.8541	10.8862	9.89295	10.6045
LE01Gene00337	10.5707	10.3263	10.6856	10.7982	10.8201	10.8473	10.8071	10.7923	10.8699	10.3191	10.1302	10.2329	10.2114	10.4783	10.2634	10.2759	10.0103	10.2147
LE01Gene00338	9.43864	9.14776	9.55037	10.3784	10.2863	10.4436	10.6558	10.594	10.6092	9.23567	9.54655	9.31634	10.4051	10.7057	10.5761	10.5685	10.3478	10.5897
LE01Gene00339	10.6997	11.0336	10.9808	11.169	10.7238	10.5242	11.1068	10.6104	10.7693	10.9186	10.9044	10.9668	10.9189	11.322	10.8452	11.0581	10.9364	11.7228
LE01Gene00340	9.55194	9.24436	9.33354	10.1229	9.84449	10.1061	10.2501	10.1626	10.2395	10.1703	10.9131	10.9036	11.8137	12.5579	11.1663	10.9142	11.9036	11.127
LE01Gene00341	9.78022	10.1044	9.49324	8.83857	9.10026	8.63046	8.09146	8.41856	7.70004	9.50218	9.62259	9.45758	9.49488	9.47634	8.72609	7.94753	8.75074	8.23387
LE01Gene00342	10.7956	10.6071	10.2859	10.3398	10.4589	10.2405	10.2828	10.687	10.2542	10.8968	11.1621	10.8534	10.9077	10.8188	10.9332	10.5141	10.5203	10.3592
LE01Gene00343	6.54982	5.93919	6.80738	5.6315	5.98939	6.17872	7.343	6.12204	7.11074	6.20565	6.81739	6.09986	9.22173	10.5498	8.50192	8.96617	10.9052	10.2207
LE01Gene00344	10.9113	11.1891	11.3706	10.9278	10.7785	11.0973	10.7309	10.6724	10.7628	10.5232	10.3927	10.0934	10.7355	10.6512	10.2934	10.5904	10.9529	10.8733
LE01Gene00345	8.69681	8.98817	9.3457	9.08634	9.42998	9.26981	8.92203	8.88955	8.71985	8.59751	8.52413	8.25094	9.09909	8.5396	8.02954	8.18669	8.46517	8.58315
LE01Gene00346	10.3557	10.0057	10.0549	10.1494	10.0816	10.2257	10.1193	10.0525	10.0882	10.2553	10.2016	10.7498	10.7324	10.0903	10.5071	10.4834	9.86663	10.3635
LE01Gene00347	11.4244	11.1748	11.0129	11.7003	11.1945	11.5943	11.5003	11.1134	11.418	11.2304	11.5183	11.5919	12.0968	11.404	11.7785	11.6752	11.0786	11.8764
LE01Gene00348	10.6521	10.5213	10.3626	10.3478	10.0792	10.2025	10.2196	9.92709	10.2714	9.80269	9.96898	9.47199	9.55534	9.50924	8.84104	9.49509	8.92667	9.38514
LE01Gene00349	10.1552	10.1755	10.4683	11.3392	11.1075	11.4763	11.6085	11.2662	11.6309	10.0539	9.92961	10.4156	11.5955	11.7098	11.6476	11.1618	11.4107	11.5019
LE01Gene00350	7.5421	7.99913	7.52262	6.6909	6.78393	6.84931	8.09786	7.38736	8.02682	7.77113	7.10681	6.96668	5.81271	5.92883	5.56929	5.86358	6.12436	6.48262
LE01Gene00351	10.459	10.6177	10.2114	9.98263	10.2031	10.1098	9.92415	10.3011	9.81858	10.4217	10.3292	10.0679	9.60646	9.63205	9.57414	9.39418	9.67325	10.0061
LE01Gene00352	9.00294	9.25345	9.14933	11.2137	10.7569	10.9271	10.7112	10.2527	10.6522	9.26784	9.29094	9.28169	10.8305	10.6804	10.6779	10.2561	10.6705	11.2469
LE01Gene00353	11.8444	12.08	12.4858	13.1583	13.1448	13.1013	12.9941	12.8813	12.7918	11.6296	11.5212	11.6797	13.0949	12.849	12.7358	12.3242	12.981	13.3653
LE01Gene00354	10.0671	10.0231	10.7533	12.8301	12.2034	12.7271	12.7199	11.9352	12.6847	9.55526	9.34752	9.80047	11.9713	12.0491	11.5717	11.9296	12.1469	12.3814
LE01Gene00355	10.3686	10.2132	10.4525	10.1806	10.0903	10.0358	10.1596	10.2515	10.3191	10.253	10.2052	9.95655	10.1557	10.328	10.3251	10.1961	10.1077	10.0282
LE01Gene00356	7.14348	6.74612	7.16839	8.31415	7.90081	8.52249	8.46281	8.3187	8.34888	7.40861	7.1661	7.2979	7.85293	8.38969	8.19631	7.52617	7.52921	8.6164
LE01Gene00357	12.3096	12.4271	11.436	9.93925	10.2492	9.52799	9.28112	10.6046	8.8765	13.1462	12.8942	12.7212	10.7968	10.1419	10.7949	9.7184	10.2172	10.3493
LE01Gene00358	12.1199	12.0154	11.6186	10.6922	10.7968	10.7421	10.4194	10.9371	10.1792	12.147	12.0704	12.139	11.2976	10.9585	11.3943	11.5614	10.9076	10.8338
LE01Gene00359	10.4376	10.9453	10.1733	9.16637	9.3497	9.08226	9.16701	9.19879	9.23801	10.3793	10.1315	10.104	8.93226	9.16516	9.42169	9.4323	9.89295	9.51228
LE01Gene00360	9.1473	9.50814	9.41656	10.8272	10.7608	11.0246	11.471	10.4935	12.1116	8.96567	9.4916	9.36791	11.8268	12.5583	11.6128	12.4307	12.726	11.9467
LE01Gene00361	10.5944	10.3843	10.316	10.2496	10.2054	10.3404	10.4622	10.3753	10.4397	10.3355	10.6608	10.8062	10.5995	10.2269	10.8248	10.5523	10.6532	10.6109
LE01Gene00362	12.1591	12.2769	11.9102	10.9378	11.3522	10.9207	10.9225	11.0131	11.1352	12.576	12.3493	12.3558	11.3394	11.4015	11.4635	11.2315	11.3947	11.0913
LE01Gene00363	12.1284	12.6428	12.4473	12.2832	12.3042	12.2717	12.2763	12.4906	12.2862	12.4684	12.4367	12.4443	12.4645	12.3337	12.5717	12.7966	12.7792	12.5431
LE01Gene00364	10.5248	10.4803	10.188	9.09182	9.56765	9.20376	9.06939	9.48925	8.6326	10.3887	10.3676	10.1027	9.38408	8.56191	8.78133	8.99342	8.4161	8.3873
LE01Gene00365	11.464	11.474	11.0835	9.75999	10.1882	9.80029	9.60708	10.3514	9.70069	11.5017	11.5967	11.5667	9.84971	9.8577	9.83946	10.0609	9.29811	9.40853
LE01Gene00366	11.3317	11.2132	10.7101	9.72165	10.1051	9.85028	9.965	10.3594	9.75052	11.4958	11.7398	11.6088	10.7236	10.5082	10.7763	10.2685	10.4621	10.4367
LE01Gene00367	12.7736	12.4808	12.3038	11.4144	11.5618	11.3883	11.2969	11.6802	11.4647	12.8488	13.1237	13.4598	12.8178	12.2862	13.3624	13.0442	12.1853	12.403
LE01Gene00368	11.0857	10.9148	11.1129	11.1055	11.3278	11.1029	11.1139	11.5764	11.3045	11.2292	10.9008	11.1919	10.8223	11.1169	11.2179	11.582	11.3461	11.3036
LE01Gene00369	6.66944	7.39799	6.13234	5.09049	7.26736	5.60368	6.18146	9.10925	4.40901	8.42895	7.63333	10.08	9.23299	8.40622	10.6851	9.52652	8.38861	7.2099
LE01Gene00370	7.14348	7.58957	7.80092	6.6764	7.20484	6.77596	7.28806	7.47431	7.03852	11.7373	14.0976	13.883	13.3903	15.5466	14.8079	13.1107	15.3592	14.1966
LE01Gene00371	9.19238	8.94395	9.40886	9.83699	9.68843	10.1369	9.84452	10.0254	9.72582	9.20989	9.0656	9.91192	10.1403	10.0501	10.3344	9.89899	9.64836	10.1187
LE01Gene00372	3.32179	3.84929	4.39346	3.95129	0	2.26608	0	0	2.45911	4.91275	4.03722	5.05659	3.61221	3.86098	3.50197	3.53572	0	4.38343
LE01Gene00373	7.83716	7.43839	7.50827	7.48187	6.96727	6.76337	6.42498	7.07873	6.52513	7.89985	7.87752	8.12106	7.10451	7.33476	7.5059	6.76941	7.12513	7.0782
LE01Gene00374	8.85097	9.02843	8.84412	10.0905	9.56231	10.0489	10.2898	9.97857	10.0566	8.88206	9.0656	9.14955	9.43957	9.35809	9.49787	9.19989	9.1257	9.55292
LE01Gene00375	11.0457	11.0937	11.1509	10.828	10.7654	10.964	10.81	10.8175	10.8169	11.5137	11.5562	11.6287	11.3147	11.2135	11.2887	11.1869	11.0201	11.5591
LE01Gene00376	6.4933	7.00476	6.92006	8.34199	8.49686	8.55574	9.18817	8.5802	9.02405	10.0852	7.96914	8.94329	8.75925	8.89043	9.09103	9.47589	9.31281	9.01859
LE01Gene00377	7.02886	7.4621	5.93192	7.351	7.03043	7.43009	6.68521	6.75669	7.03852	11.0125	12.9347	12.3297	6.63302	9.34957	5.95285	5.21065	7.10275	7.01311
LE01Gene00378	12.3663	12.5453	13.254	14.4485	14.2385	14.3225	14.3179	13.7967	14.0422	12.5999	12.2233	12.7645	14.1988	14.0581	13.7385	13.7925	14.0674	14.4816
LE01Gene00379	9.98113	10.1743	10.1129	10.8945	11.0445	10.9362	11.2885	11.1731	11.3716	9.86108	9.71646	10.339	10.384	10.5937	11.0509	10.7427	10.4882	10.0795
LE01Gene00380	2.86776	3.64349	3.68123	3.95129	3.60876	3.3958	3.84248	3.75294	2.45911	4.28126	0	3.47087	2.24578	2.28267	3.74362	2.06322	2.40534	2.99184
LE01Gene00381	9.64892	9.45792	8.9803	8.71628	8.81052	8.84588	8.60893	8.83474	8.66893	9.30373	9.60484	9.68676	9.49862	9.13075	9.65953	8.93527	8.76862	8.98504
LE01Gene00382	11.5052	10.8822	10.9572	10.2954	10.2314	10.3329	10.1146	10.1692	10.3641	11.4425	11.9616	11.915	10.8893	10.7622	11.1958	11.0408	10.5649	10.0662
LE01Gene00383	10.1171	10.0043	10.04	9.2666	9.23596	9.01213	9.0563	9.0482	9.49795	10.2903	10.478	10.7683	9.76846	9.39997	9.64286	10.0276	9.64061	8.87943
LE01Gene00384	10.251	10.5147	10.7856	10.623	10.3067	10.2753	10.0582	9.49133	9.71621	10.7987	10.4741	12.0854	11.4826	10.7908	12.6272	10.6845	10.4533	10.9786
LE01Gene00385	4.4981	3.26643	3.78009	4.04459	2.50245	5.17967	3.42028	3.51115	4.06572	4.48261	3.27392	6.16215	4.60841	4.04116	6.92898	4.16637	4.00374	4.51463
LE01Gene00386	7.98796	8.45407	7.52974	7.314	6.86702	6.96382	7.1346	6.98707	6.6596	8.48475	7.92406	8.00688	8.22189	8.14568	8.77113	8.87141	8.48261	8.19037
LE01Gene00387	9.92481	9.9949	9.96186	9.89765	9.54979	9.89859	9.68144	9.62277	9.83111	10.1208	10.2786	10.2723	9.95411	9.92522	9.95206	10.4179	10.0878	10.3679
LE01Gene00388	6.24207	4.79836	5.88827	6.02405	6.34454	5.93097	6.18146	6.30398	6.35716	5.98019	5.19592	5.74026	6.09535	6.56597	5.21537	6.2323	5.88307	6.82364
LE01Gene00389	6.60421	6.20581	6.29163	6.27571	6.57384	6.10077	7.03134	6.75669	5.65782	6.04526	7.00225	6.94321	7.6728	7.60921	7.97727	7.68319	7.78954	7.52987
LE01Gene00390	11.4791	11.6089	11.3995	10.4727	10.7938	10.2371	10.5206	10.7248	10.5248	11.6194	11.8422	11.6013	10.697	10.8845	10.8549	10.5785	10.5454	10.2749
LE01Gene00391	10.6641	11.6704	10.5229	8.28576	8.28442	8.45752	7.97106	8.86402	8.59952	10.9642	9.99374	10.4346	8.82025	9.00613	9.51223	8.59917	9.40029	8.89155
LE01Gene00392	6.34148	6.82138	6.79561	7.03583	6.70868	7.41407	7.51553	6.64117	7.23442	6.10751	6.01346	6.18233	6.34825	6.89367	6.36808	6.72674	6.51174	6.23872
LE01Gene00393	9.85081	9.98538	9.77823	9.4653	9.26689	9.1779	9.41278	9.39655	9.21635	10.3495	9.98279	10.0679	9.54453	9.47242	9.43897	9.4323	9.31281	9.18051
LE01Gene00394	10.5699	10.5316	11.2502	12.636	12.3447	12.5914	12.6842	12.3494	12.404	10.3355	10.3475	10.1987	12.1209	12.4758	11.8165	11.9296	12.4758	12.5864
LE01Gene00395	8.21465	8.13809	9.05624	10.1055	10.0181	10.2118	10.5313	10.5496	10.2502	8.6577	8.75726	8.88292	10.6889	11.3204	10.3652	10.8065	11.0836	10.7355
LE01Gene00396	12.737	12.5818	12.6385	11.9175	12.0546	11.8262	11.6119	12.0405	11.5842	12.601	12.815	12.9208	12.1852	12.1823	12.4732	12.4429	12.0227	11.9499
LE01Gene00397	11.5843	11.4241	11.2317	10.9596	11.0419	11.1098	11.196	11.279	11.2616	11.5464	11.6225	11.767	11.0251	11.0409	11.2988	11.4968	10.9482	10.7135
LE01Gene00398	11.7012	11.7134	11.7822	11.7261	11.6254	11.6251	11.783	11.6257	11.7241	11.9795	11.8632	12.195	11.5881	11.7202	11.846	11.7401	11.6624	11.5817
LE01Gene00399	8.58293	8.87791	9.04882	9.94228	9.75539	10.236	9.95797	9.88009	9.60601	8.59751	8.17556	8.51637	9.39013	9.51306	9.00373	9.34801	9.65029	9.79481
LE01Gene00400	6.29263	6.18696	6.59297	7.92996	7.05088	8.03863	6.59756	6.20575	7.24516	5.60188	4.59259	3.33326	6.22733	5.56648	2.35943	5.03527	4.62274	4.79835
LE01Gene00401	8.74602	9.25571	8.78881	8.96031	8.71121	9.09488	9.32817	9.50585	9.46848	9.05527	8.24136	8.01816	7.38853	6.96237	7.27524	7.32156	6.71722	7.70496
LE01Gene00402	9.69037	9.10322	9.70935	9.5433	9.42998	9.92144	9.7026	9.27586	9.52463	9.02601	9.09641	9.07595	9.67081	9.24315	8.67232	9.17101	9.0072	9.1581
LE01Gene00403	4.60866	5.5542	5.03759	6.81527	6.40934	6.9077	7.90688	7.55632	7.61155	3.66094	4.34147	4.65594	5.66089	6.01759	5.04529	6.14857	7.02157	5.92156
LE01Gene00404	10.8779	10.3739	11.289	11.2527	11.4122	11.4337	11.6886	11.3922	11.5065	11.1365	12.499	12.1152	12.389	13.8717	12.8533	12.5984	13.8331	12.5076
LE01Gene00406	10.8647	10.4331	10.6311	9.88981	9.91034	10.0371	9.98413	9.91315	10.2219	10.9287	11.3968	11.6259	10.4061	10.5273	10.7695	10.9416	10.5339	9.87637
LE01Gene00407	7.36442	7.76503	8.44904	8.45677	8.67213	8.30075	8.28905	8.7005	8.50442	7.91733	7.99662	8.09468	9.00501	8.63387	8.54245	8.59917	8.36999	9.01305
LE01Gene00408	12.3783	12.6415	12.6077	12.7077	12.094	12.5503	12.2851	11.4877	12.3372	11.9816	11.9124	12.1834	12.4664	11.5847	11.1388	12.3926	11.3496	12.2959
LE01Gene00409	8.78775	9.2237	8.95672	9.37612	9.39641	9.56656	9.54283	9.28551	9.45929	9.24263	8.84452	8.90737	9.14512	9.08783	9.48545	9.11696	9.53593	9.6109
LE01Gene00410	7.48527	6.88123	7.06435	8.69486	7.14901	8.98798	7.12209	6.44844	7.32828	4.28126	2.76167	2.332	4.1573	3.95388	4.13148	2.38927	3.55385	5.89771
LE01Gene00411	10.3666	10.1477	10.3304	10.357	10.4132	10.2552	10.4917	10.509	10.3666	10.3918	10.3771	10.1999	10.6533	10.2176	10.4042	10.4434	10.0503	10.4825
LE01Gene00412	10.3074	10.2202	10.2922	10.3096	10.4845	10.0527	10.1734	10.4533	10.2165	10.7597	10.6252	10.7641	10.4995	10.1712	10.455	10.3598	9.7634	10.3036
LE01Gene00413	9.35387	10.0164	9.63205	11.4611	11.1418	11.7034	11.1659	11.1931	11.3728	8.66806	8.97733	8.81668	8.60484	9.29734	8.43029	10.3064	9.66564	10.5462
LE01Gene00414	5.95869	5.93919	5.8202	4.90388	3.99392	4.02153	3.24676	3.86016	3.96541	6.22451	6.82967	6.12092	5.29884	5.99591	5.08972	6.0131	6.05611	6.05689
LE01Gene00415	11.1094	11.3127	10.9975	10.1363	10.1766	10.0707	10.0599	10.3106	10.2042	11.44	11.3254	11.1674	10.3189	10.4596	10.5515	10.3828	10.6475	10.4022
LE01Gene00416	12.8367	12.6271	12.7219	12.074	12.1619	12.0177	11.8472	12.0168	11.7624	12.9731	13.0051	13.0296	12.4504	12.3817	12.3963	12.3019	12.0883	11.8972
LE01Gene00417	11.7686	11.4145	10.9988	10.6116	10.78	10.7477	10.7904	11.3364	10.9832	11.5529	12.089	11.8814	11.5485	11.6851	11.6797	11.7632	11.401	11.3058
LE01Gene00418	11.3443	11.5621	11.3814	12.6395	11.9503	12.4916	12.9118	11.7371	12.5637	11.7369	11.9497	12.1791	12.7428	13.1204	12.3439	12.4327	12.9451	13.2113
LE01Gene00419	11.7995	12.2213	11.6875	10.9324	11.1882	11.1955	10.9378	11.1535	11.0421	11.9125	11.8242	11.5772	11.1509	11.2187	11.1715	10.8918	11.4693	11.0473
LE01Gene00420	10.9519	11.0356	11.1158	10.306	10.4845	10.1838	10.4347	10.5018	10.3934	11.5431	11.3786	11.3854	10.6423	10.6417	10.8549	10.9632	10.5234	10.3614
LE01Gene00421	10.4045	10.866	10.5004	11.4387	11.3988	11.3985	11.7211	11.1409	11.6253	10.6619	10.3833	10.2257	11.0088	11.2017	11.0354	11.2078	11.4577	11.866
LE01Gene00422	6.15365	5.7722	6.59297	7.2271	6.01043	6.97479	6.42498	6.49909	6.7377	5.28017	4.99261	5.14151	5.97173	4.70749	4.43685	4.83557	4.49108	3.69183
LE01Gene00423	10.389	9.80245	10.3181	10.4706	10.8955	10.3873	10.6471	11.0131	10.1524	9.71709	10.2953	10.1598	10.7276	10.4704	10.6222	10.3863	10.1272	10.0581
LE01Gene00424	12.1091	12.048	11.9023	11.5378	11.4574	11.4959	11.0924	11.1269	10.7906	10.6851	10.8154	10.2747	11.0501	10.2591	9.81154	9.86332	9.84488	10.3851
LE01Gene00425	9.40647	8.86017	9.37565	10.8867	10.6096	10.9516	10.8998	10.5456	10.8232	8.44109	8.67461	8.40056	10.6507	9.6599	9.93542	9.9291	9.70145	10.4735
LE01Gene00426	8.88432	8.66627	8.13563	8.40492	8.34779	8.50747	8.03919	8.22652	8.22962	8.82453	9.14141	8.1	8.31808	7.69245	7.65382	8.04915	7.5787	8.33499
LE01Gene00427	5.34326	4.52579	5.6991	5.40393	5.96804	5.32388	6.10724	6.57974	6.25464	4.91275	5.67551	5.33419	5.42988	5.99591	6.00018	5.94027	6.27207	5.41715
LE01Gene00428	0	1.54406	2.47229	0	2.72242	0	0	0	0	0	0	0	0	0	0	0	0	0
LE01Gene00429	11.6484	11.8946	11.741	11.9217	12.0086	11.8292	12.0695	12.0469	12.0809	11.2426	11.0512	10.869	11.0628	11.2956	11.3938	11.573	11.5521	11.5605
LE01Gene00430	10.6537	10.9425	10.7525	9.58273	9.63693	9.82777	9.26983	9.70777	9.19989	11.1183	10.8384	10.754	9.2172	8.56559	9.0153	8.96922	8.85149	8.45422
LE01Gene00431	11.3001	11.419	10.9292	9.27385	9.81639	9.2919	9.37637	9.88961	9.62873	11.528	11.2859	11.2957	9.29233	8.5396	9.63163	9.66667	8.77217	8.29448
LE01Gene00432	10.5017	10.4957	10.831	11.4328	11.3843	11.3806	11.6527	11.7145	11.4007	10.4043	10.4009	10.3723	11.4878	11.4431	11.6824	11.4101	11.316	11.5667
LE01Gene00433	9.89784	9.38331	9.4526	8.81228	8.78021	8.84886	8.97168	9.06791	8.54408	9.97679	10.5278	10.4555	9.16407	9.20822	9.02105	8.77	8.9488	8.95647
LE01Gene00434	2.67794	1.9539	2.21394	3.50269	3.23261	2.74744	4.96946	3.86016	0	3.28342	2.95335	3.71206	1.52179	4.34545	0	1.6413	4.34619	3.31353
LE01Gene00435	0	1.54406	2.47229	0	2.72242	0	0	0	0	0	0	0	0	0	0	0	0	0
LE01Gene00436	9.76836	9.28259	9.4204	9.58855	8.95045	9.19441	9.2208	8.71128	9.23262	8.59389	8.70158	8.34793	8.9542	8.71574	8.32735	8.70554	8.43861	8.08346
LE01Gene00437	10.1403	10.3089	10.2464	10.1985	10.1075	10.2908	10.2357	10.1134	10.0837	10.2391	10.0681	10.3198	10.0297	10.0409	10.317	10.2735	9.83303	10.1731
LE01Gene00438	10.9733	10.9432	10.9969	11.2563	11.1299	11.2967	11.0884	10.9317	11.0786	11.1654	10.8913	11.0041	11.2374	10.9821	10.94	10.8039	10.93	11.431
LE01Gene00439	13.0538	13.3439	12.9553	13.5612	13.0262	13.1696	13.9152	13.0629	13.6691	13.1882	12.8799	12.8812	12.7127	12.6096	12.422	12.3991	12.5815	12.8314
LE01Gene00440	11.6851	12.2082	11.8913	11.065	11.6682	11.2422	11.2183	11.894	11.2077	12.1002	11.7036	11.6424	10.7395	10.7986	11.3275	10.6325	10.7328	10.4715
LE01Gene00441	11.8636	11.3982	11.2614	11.1774	12.1864	11.1569	10.966	12.507	11.3506	12.4125	12.5299	11.974	11.5018	11.2811	11.1208	12.1294	11.1776	11.143
LE01Gene00442	11.2504	10.8741	10.9224	10.7261	10.899	10.527	10.5881	10.9279	10.7749	11.0903	11.3644	11.2116	11.0225	10.9972	11.0537	11.2511	10.6724	10.551
LE01Gene00443	4.85285	4.79836	5.15276	7.03583	6.94558	7.25223	7.80881	7.08978	7.989	4.76606	2.27934	2.00945	6.29766	6.78408	6.60082	7.12747	7.43382	6.99074
LE01Gene00444	10.648	10.5446	10.5883	10.9086	10.8393	10.92	10.346	10.6304	10.552	10.4349	10.191	10.3513	10.8915	10.3028	10.6457	10.6937	9.72728	10.8307
LE01Gene00445	11.6756	12.5314	11.3268	9.40719	9.13659	9.26535	8.87806	8.84782	8.22962	12.1781	11.6914	11.443	9.05154	9.85016	9.54451	10.1088	9.95048	10.6146
LE01Gene00446	9.90598	9.8009	9.92183	10.0418	10.1567	10.1671	10.4498	10.2001	10.4834	9.68342	9.22974	9.56139	9.80966	9.74197	9.87163	10.0422	10.0088	10.0019
LE01Gene00447	8.9196	8.36045	8.81819	10.652	9.97197	10.4377	11.0142	10.2128	10.6217	8.21468	8.38551	8.33447	10.4473	10.6821	10.1669	10.8175	10.9922	11.1786
LE01Gene00448	10.8373	10.6906	10.9651	10.8589	11.0741	10.7564	10.9808	11.3364	10.9976	10.707	10.5146	10.8215	10.8584	10.9697	11.2574	11.3149	11.1554	11.2933
LE01Gene00449	10.3378	10.5288	10.5067	10.2174	10.4985	10.3739	10.2078	10.3177	10.4663	10.3918	10.611	10.1862	10.2955	10.677	10.7244	10.6043	10.6523	10.3765
LE01Gene00450	11.3695	11.5311	11.3521	10.7119	11.2459	10.8239	11.0226	11.3491	10.9848	11.8275	11.7292	11.473	10.7505	11.6059	11.4503	11.4307	11.9016	11.3193
LE01Gene00451	9.79198	10.161	9.9513	10.0517	10.1413	10.0041	9.75418	10.1886	9.82754	9.974	9.56868	9.31862	9.56785	9.70068	9.18619	9.37589	9.56691	9.63092
LE01Gene00452	12.6175	12.4715	11.9664	10.7881	11.071	10.6722	10.5721	11.0991	10.5925	12.2196	12.167	11.9809	11.1366	11.0169	11.407	11.2679	10.7043	10.6833
LE01Gene00453	9.71529	9.19805	9.61875	11.0162	10.4425	10.9825	11.0576	10.5486	10.9467	9.50218	9.82773	9.71474	11.2429	10.5102	11.1269	11.2264	10.2353	11.2486
LE01Gene00454	12.8216	12.6038	12.1803	11.451	11.2347	11.4816	11.4272	11.3474	11.4316	12.8631	13.1102	13.0301	12.2295	12.0603	12.3191	12.2772	11.9257	11.7143
LE01Gene00455	10.8916	11.0572	11.5344	13.9265	13.2407	13.9246	14.8135	13.3145	14.6055	11.2842	11.5002	11.4006	14.0227	13.8483	13.5905	13.5598	13.6567	13.8922
LE01Gene00456	13.6231	13.6941	13.908	13.9222	13.7503	14.225	13.3956	12.9838	13.4815	13.4277	13.551	13.5201	14.3344	13.9859	13.8224	13.2244	13.9647	14.2702
LE01Gene00457	12.2229	12.2117	11.9372	11.1819	11.3506	11.2512	11.1179	11.2179	11.222	12.1827	12.2233	12.2676	11.2922	10.9849	11.1888	11.4808	10.6847	11.1005
LE01Gene00458	9.95259	9.67129	10.2984	12.2709	11.3843	12.1119	12.1332	10.8865	12.1371	9.51372	9.71315	9.96822	11.7834	11.7888	10.9723	12.057	12.2697	11.9572
LE01Gene00459	10.6649	10.9867	10.9299	10.8182	10.7647	10.6906	10.6106	10.4788	10.6237	10.6001	10.5127	10.4893	10.2273	10.5149	10.2316	10.2685	10.6667	10.6462
LE01Gene00460	10.7137	10.8331	10.8736	10.6437	10.6876	10.6416	10.2814	10.3921	10.3543	10.5308	10.4354	10.222	10.3242	10.0903	9.89998	10.3375	10.3819	10.2933
LE01Gene00461	12.0652	12.4771	11.9362	10.7305	10.9047	10.5881	10.3147	10.8769	10.6732	12.5872	12.4539	12.2002	10.8073	10.7165	11.2322	10.8797	10.9692	10.6282
LE01Gene00462	11.9603	12.0911	12.3262	12.3248	12.3343	12.3885	11.9325	12.3502	12.0383	12.2027	11.9903	12.0512	12.0872	11.54	11.5609	11.678	11.3287	12.1512
LE01Gene00463	9.14959	8.97449	8.78584	8.32349	8.33534	8.49989	7.33218	7.88309	7.88301	9.02332	8.91821	8.80697	7.512	7.60205	7.0798	7.04883	7.5208	7.33945
LE01Gene00464	12.253	12.2343	11.8467	10.3224	10.6728	10.6155	9.95621	10.3468	10.1089	12.2196	12.6567	12.2997	11.1832	11.9061	11.4959	11.2232	11.5598	11.1109
LE01Gene00465	8.94617	8.77123	8.81527	10.4643	9.98664	10.673	11.5664	10.5526	11.1251	8.5003	8.48974	8.43881	10.1498	11.2494	10.4855	10.6363	11.4254	11.2237
LE01Gene00466	11.6629	11.4701	11.7029	12.0301	11.9638	12.0979	12.5479	11.8773	12.596	11.2581	11.3351	11.543	12.5896	12.3466	12.1219	12.3149	11.8983	12.2216
LE01Gene00467	12.7043	12.6225	12.229	11.5568	11.9689	11.5912	11.8222	11.9448	11.9105	12.7278	12.9686	13.0306	12.4132	12.2505	12.4881	12.5843	12.1776	11.7765
LE01Gene00468	11.7578	11.6062	11.3661	10.8685	10.9311	10.6931	10.4696	11.0922	10.566	11.5529	11.6732	11.6546	10.9784	10.9288	11.0801	11.45	10.93	10.8809
LE01Gene00469	11.5449	12.1075	11.8234	11.6986	11.7154	11.6437	11.4636	11.5228	11.471	11.7183	11.3384	11.2688	11.304	11.1778	11.3023	11.4246	11.6354	11.2807
LE01Gene00470	12.2251	12.1474	11.8313	11.1972	11.1801	11.2176	11.0956	11.1181	11.0483	12.3732	12.4324	12.4571	11.8096	11.4967	11.7831	11.5964	11.2939	11.3444
LE01Gene00471	10.6277	10.8047	10.4637	10.2086	10.3782	10.4642	10.422	10.6104	10.4006	10.7229	10.5031	10.4607	10.0219	10.4346	10.2166	10.2193	10.4299	10.3537
LE01Gene00472	11.4589	11.1873	11.1105	10.9863	11.0233	10.9341	10.8485	10.8841	10.7915	11.4734	11.4833	11.6819	11.161	11.11	11.2731	11.3334	10.9892	10.794
LE01Gene00473	10.19	10.2015	10.2572	9.16377	9.25592	9.33935	9.46076	9.41425	9.47534	9.67831	9.87736	9.54589	9.33267	8.97599	9.15255	9.23837	9.26322	9.07815
LE01Gene00474	11.4492	11.1336	11.5955	11.7406	11.8282	11.9467	11.5502	11.7159	11.6792	11.283	11.214	11.4304	11.895	11.5595	11.8415	11.7477	11.1896	11.7749
LE01Gene00475	6.27597	6.44669	6.01546	6.47324	6.7215	5.93097	5.82799	6.01008	6.89594	6.20565	6.92427	6.84536	7.76878	7.31738	8.07997	7.89069	7.50382	7.75226
LE01Gene00476	10.5079	10.7196	11.415	13.1227	12.8073	12.9744	13.1616	12.7976	12.9246	10.1605	10.134	10.4357	12.5523	12.6208	12.3607	12.5052	12.783	13.0318
LE01Gene00477	10.5852	10.8132	10.6983	11.1495	10.8216	10.9064	11.0657	10.619	10.8348	10.3559	10.3687	10.2147	10.7236	10.6451	10.5153	10.3256	10.6781	10.955
LE01Gene00478	12.1399	11.8686	11.841	11.0326	11.2246	11.0521	10.8711	11.1809	10.8312	12.2587	12.4925	12.099	11.4525	11.1826	10.7129	11.304	11.0649	10.7355
LE01Gene00479	11.4561	11.6542	11.7306	11.7514	11.6793	11.6722	11.8632	11.7006	11.8669	11.0781	10.9059	11.098	11.0903	11.4214	11.4004	11.4095	11.5968	11.7088
LE01Gene00480	11.371	11.2719	11.3031	10.7652	10.8013	10.6277	10.5801	10.9531	10.5499	11.7204	11.8084	12.3138	11.1954	11.2654	11.3199	11.6416	11.2353	10.6524
LE01Gene00481	10.4479	10.5437	10.4544	10.9078	10.9866	10.8255	10.8739	10.9734	11.0274	9.78692	9.80305	10.1406	10.6398	10.6616	10.6897	10.9463	10.4197	10.9949
LE01Gene00482	10.6383	9.74563	10.6671	10.2323	10.5773	9.98113	10.4117	10.6389	10.3179	10.2982	10.5585	10.6199	10.4731	10.3463	10.391	10.8625	10.4817	9.78672
LE01Gene00483	13.0697	13.5986	13.1186	13.0282	13.0993	12.9731	13.5163	13.4701	13.483	13.6295	13.29	13.518	12.7069	13.2731	13.2508	13.1965	13.6778	13.5261
LE01Gene00484	11.1006	10.9069	11.0756	11.2187	11.1555	11.2153	11.4073	11.5116	11.0658	11.0605	11.3384	11.443	11.6154	11.5874	11.5864	11.2778	11.4294	11.5225
LE01Gene00485	13.1228	13.244	13.318	13.171	13.1106	13.2002	13.2449	13.052	13.3569	12.2552	11.9127	11.9392	12.3945	12.4802	12.243	12.4741	12.9652	12.7942
LE01Gene00486	11.7004	12.1069	11.4963	10.0891	10.3024	10.0605	9.65997	10.3329	9.95562	12.374	12.1597	12.1076	10.6253	10.3697	10.3675	10.5614	10.3287	10.2231
LE01Gene00487	5.2093	5.96154	6.32476	5.57006	5.98939	5.65913	5.88833	6.01008	6.12114	4.35154	5.03563	5.43855	5.11629	5.03969	6.6161	5.83708	4.55841	5.74573
LE01Gene00488	9.21003	9.52136	9.53276	9.83699	9.89769	9.496	9.34172	9.19879	9.80776	8.83376	8.91246	9.31177	9.27064	8.67879	8.8668	8.73813	8.838	8.9935
LE01Gene00489	14.4327	14.6233	14.1855	13.9875	13.8868	13.9192	14.0526	13.9047	14.3286	14.5642	14.5521	14.5621	13.9481	13.8931	14.094	14.0366	14.0129	14.251
LE01Gene00490	10.2826	10.2903	10.0781	9.22236	9.51341	9.56112	9.47559	9.83644	9.49346	10.0592	10.014	10.4853	9.09416	9.0007	9.72966	9.6723	8.95506	9.05946
LE01Gene00491	9.36376	9.51948	9.32743	7.89906	8.45527	8.11001	7.96407	8.6491	7.97617	9.27464	8.91246	8.9104	7.47454	7.34337	7.85387	8.07773	7.65759	7.35704
LE01Gene00492	11.3567	11.009	11.7025	12.6197	12.8304	13.0295	13.2004	13.2356	13.516	10.3037	10.5031	10.4934	12.1765	12.7313	12.3907	13.3733	12.9512	13.2586
LE01Gene00493	10.5397	9.68311	10.011	10.2533	10.2939	10.2257	10.5407	10.6398	10.3629	10.2518	10.6855	10.6227	10.32	10.1554	10.4603	10.6013	9.88968	10.4429
LE01Gene00513	6.7072	5.74668	7.14075	6.48992	5.80902	5.93097	5.73246	6.28486	6.45288	7.57943	7.43068	8.23654	6.34825	6.56597	7.74694	7.25306	7.67286	6.14054
LE01Gene00514	3.56057	0	0	3.50269	3.08175	2.74744	3.95961	0	4.06572	3.66094	4.80642	5.36983	0	3.12623	4.13148	4.0786	0	4.38343
LE01Gene00515	0	0	1.899	0	2.50245	0	0	2.85616	0	2.77071	2.95335	0	2.9165	0	0	0	0	0
LE01Gene00526	11.6989	11.5446	11.2577	10.5393	10.269	10.2037	9.47804	10.6152	9.48443	11.1063	11.2997	11.6185	11.2091	10.9266	12.2761	12.1161	10.8889	10.335
LE01Gene00527	13.311	13.2781	12.795	11.5543	12.6095	11.8258	11.6483	13.029	11.745	13.0043	12.8401	12.5698	12.2546	12.3152	12.9345	12.2026	11.9861	12.1546
LE01Gene00528	8.3913	8.38959	8.18156	10.1176	9.24264	10.1173	10.4746	9.59781	10.5104	9.16912	9.36238	9.85806	10.5409	11.0289	10.5565	12.0185	11.6899	10.9347
LE01Gene00529	10.6649	10.7616	10.6525	11.1383	11.1649	11.245	11.2013	11.2052	10.984	10.882	11.1327	10.8744	11.124	11.5856	11.4336	11.3107	11.5097	11.7626
LE01Gene00530	12.0365	12.0053	11.9538	11.0162	11.2563	11.1338	11.0723	11.2097	10.984	12.3939	12.179	12.3541	11.0121	11.214	11.1926	10.7011	11.3323	10.8641
LE01Gene00531	9.55021	9.65252	9.80929	10.7119	10.333	10.8292	11.2955	10.7167	11.1258	9.08394	9.04469	8.77742	10.2137	10.5928	10.0125	10.5369	10.5893	10.5221
LE01Gene00532	10.2424	9.69816	10.4748	11.3923	11.1007	11.2337	11.6923	11.3548	11.6628	9.84137	9.56502	9.81347	11.4863	11.6316	11.3866	12.0251	11.7834	11.483
LE01Gene00533	9.79929	10.1244	9.09035	7.3046	7.45555	6.93041	6.76784	7.80472	7.4814	9.49249	9.25499	9.05148	7.61888	6.58061	6.66097	7.56706	6.8708	6.93326
LE01Gene00534	8.91423	8.58941	9.34772	10.096	9.59924	10.4979	11.0828	9.88803	11.151	8.66806	8.53916	8.42617	10.4892	10.8904	9.01818	9.85509	10.3958	10.3394
LE01Gene00535	10.2208	9.93262	10.3903	11.1041	10.6892	10.9425	11.2183	10.7589	11.0665	10.261	10.1981	10.5928	11.404	11.3001	10.9841	10.856	10.8458	10.5615
LE01Gene00536	12.4651	12.2377	12.4002	11.7021	11.7541	11.7828	11.5876	11.4182	11.7057	12.527	12.6126	12.8908	12.4915	12.1226	12.4795	12.6469	11.8588	11.7342
LE01Gene00537	11.0677	10.6898	10.6606	10.349	10.424	10.4117	10.2357	10.6046	10.2055	10.6454	10.7023	10.899	10.4939	10.2995	10.7463	10.3667	10.0371	10.1693
LE01Gene00538	8.13376	8.61431	8.58172	9.48416	8.90342	9.2383	9.30622	8.91775	9.16073	8.0606	7.90098	7.74723	8.88164	9.09805	8.73661	9.06367	9.15591	9.51031
LE01Gene00539	12.4187	13.3432	12.6877	12.5005	12.1809	12.2585	12.1199	11.9421	12.1772	13.1053	13.0069	12.9609	12.2393	12.271	12.4556	12.2245	12.6145	12.5354
LE01Gene00540	11.7875	12.1455	11.9027	12.3587	12.1519	12.2512	11.8948	11.8536	11.8529	12.2661	11.741	11.9285	11.9276	11.7239	12.1821	11.633	11.8951	12.2572
LE01Gene00541	11.2082	11.2897	10.8532	10.3524	10.4873	10.1061	9.73992	10.2329	9.62463	10.4146	10.3378	10.2688	9.20582	9.06719	9.36632	9.16835	9.46751	9.33941
LE01Gene00542	8.73388	8.96069	8.91925	9.30953	9.01954	9.42979	9.59582	9.53851	9.92089	8.31043	8.24136	8.37449	8.90154	9.53013	9.48129	8.93527	9.80731	9.63814
LE01Gene00543	11.7582	12.0704	11.967	11.8202	12.0233	12.1925	12.0617	12.1502	12.2426	12.1177	12.1243	12.3704	11.862	12.5685	12.1302	11.8535	12.9706	13.148
LE01Gene00544	4.89709	5.58332	6.01546	7.18673	6.79609	7.13001	8.36533	7.03362	7.53488	3.1319	4.34147	4.09931	5.5209	7.05964	7.26558	6.42254	7.33168	7.26685
LE01Gene00545	9.1102	9.59827	9.98536	9.43761	8.27576	10.2417	10.354	8.27092	10.9384	7.01276	7.60504	7.20232	8.2532	9.75171	6.87921	8.99342	11.1362	9.59986
LE01Gene00546	11.3114	11.4716	11.3232	11.0733	11.3151	11.1635	11.3774	11.3944	11.2436	11.1482	11.3629	11.2474	11.1983	11.1276	11.3129	11.2753	11.1042	11.3635
LE01Gene00547	7.71272	8.17203	8.37979	8.50271	9.00126	8.6849	8.82116	8.96055	9.27515	7.94032	8.0965	8.5044	8.94601	9.9856	10.0282	10.0143	10.3865	9.63814
LE01Gene00548	6.40414	6.59704	6.55159	12.493	11.8356	13.9256	12.9527	9.98747	13.4265	6.00221	11.2864	11.7637	14.0388	13.3175	11.3748	13.273	13.4356	11.8236
LE01Gene00549	9.38139	9.26473	9.45634	9.03894	9.27125	9.04112	9.10797	9.28791	9.41719	9.84137	9.60127	9.71474	9.3861	9.4225	9.41298	9.1252	9.134	9.17803
LE01Gene00550	12.0212	11.8132	11.6954	11.135	11.061	11.1406	11.0892	11.0204	11.1178	11.9276	11.9504	11.6792	11.4826	11.1201	11.0261	11.1705	11.0657	10.8771
LE01Gene00551	11.5531	11.72	11.7878	11.0622	10.9759	11.1551	11.149	10.8007	11.3262	12.2333	12.1894	12.2162	11.4802	12.1498	11.8313	11.8898	12.0335	11.5279
LE01Gene00552	11.7645	11.7072	11.5831	11.1794	11.233	11.2946	11.156	11.2435	10.9134	11.7673	11.9821	12.0505	11.3482	11.3307	11.6443	11.2548	11.3305	11.4562
LE01Gene00553	12.4531	12.1385	12.139	10.3694	10.1591	10.2786	9.93849	9.98894	10.0133	12.0229	11.9872	11.443	10.1605	10.3968	9.57218	10.2052	10.0605	9.75721
LE01Gene00554	5.91632	6.49346	6.53753	8.02461	7.3019	7.59554	8.17861	7.64895	8.41693	7.57209	7.56155	7.72677	7.38853	7.63048	8.54245	8.20234	7.50382	7.81089
LE01Gene00555	10.5776	10.0994	10.0136	9.93011	9.88208	9.66971	9.30622	9.80827	9.5002	10.6919	10.666	10.9906	9.61853	9.31058	10.317	9.49932	9.32736	9.24807
LE01Gene00556	15.1436	15.1945	14.7401	12.6456	12.966	12.6682	12.3364	12.9925	12.4398	16.0321	15.9784	16.1632	14.5338	14.0297	15.437	14.8132	13.877	13.6516
LE01Gene00557	11.3933	11.1519	12.0976	14.4726	13.8119	14.6001	14.9777	13.8421	14.9957	9.53464	9.85351	10.5853	13.673	15.0585	14.072	15.1138	15.8131	14.4698
LE01Gene00558	8.85378	8.55675	9.39722	10.2508	10.2514	10.2563	10.5146	10.4143	10.8507	7.42501	7.7216	7.41339	9.98241	10.6813	10.1033	11.1039	11.4282	10.2111
LE01Gene00559	5.52341	4.89443	5.74876	6.3507	5.32907	6.50046	6.54229	5.81064	5.11855	5.20623	4.75586	4.4043	5.11629	5.37818	6.23592	6.0131	5.45864	5.89771
LE01Gene00560	10.8423	10.4241	10.6377	10.8411	10.6826	10.905	10.6634	10.6361	10.8024	10.5552	10.404	10.7311	11.2318	10.8235	10.9286	10.7622	10.1816	10.99
LE01Gene00561	10.0768	9.76799	9.98407	11.0775	10.927	11.0866	11.3721	11.3317	11.3605	9.93161	10.404	10.6726	11.5535	12.1325	12.0705	11.58	12.2211	11.8089
LE01Gene00562	12.6857	13.0798	12.8598	13.0505	12.855	12.9748	13.3476	12.9663	13.2888	13.109	13.039	13.1154	13.0317	13.6307	13.4698	13.0881	13.785	13.5674
LE01Gene00563	7.48527	7.04718	7.50827	8.29053	7.87236	8.42989	7.94289	8.14404	7.9826	6.97986	7.61217	7.66357	8.11882	7.78386	8.04655	8.21269	8.13105	7.9737
LE01Gene00564	15.0911	15.084	14.7537	13.6961	14.1248	13.7664	13.6294	14.1794	14.0669	15.1591	15.13	15.1774	13.8341	14.248	14.0771	13.9621	14.4915	14.2917
LE01Gene00565	11.7267	11.6447	11.969	12.4317	12.1622	12.3551	12.166	12.0631	12.0255	11.68	11.3713	11.849	12.3484	11.7959	12.2794	12.5115	11.6757	12.243
LE01Gene00570	9.38333	9.73755	9.40305	7.76839	8.80149	8.59891	7.74498	8.38304	8.11725	9.83831	10.1646	9.61248	8.72775	9.88597	9.72439	9.20508	9.81077	9.12254
LE01Gene00585	11.5522	11.3045	11.4729	11.2255	11.2965	11.2808	10.8627	11.2279	10.7336	11.3824	11.0772	10.8674	10.9716	10.3634	10.7549	10.6325	10.085	10.5152
LE01Gene00586	14.5795	14.7624	14.5781	13.9844	14.2888	13.9829	14.1747	14.4514	14.2965	15.048	14.9661	14.8351	14.238	14.6637	14.5032	14.1242	14.8311	14.2719
LE01Gene00587	13.724	14.076	13.8306	13.8423	13.943	14.0157	13.8893	14.01	13.8334	14.1038	13.9766	14.1813	14.1772	14.6873	14.6536	13.6721	14.7006	14.9061
LE01Gene00588	12.4489	12.2672	12.7706	13.0041	12.8773	13.0451	12.586	12.7496	12.6328	12.7685	12.4635	13.2861	12.8088	12.2123	12.9594	11.7871	12.0797	12.4315
LE01Gene00589	12.1605	12.0829	12.044	11.2936	11.7865	11.8152	11.4367	12.1432	11.7924	12.6791	13.5094	13.1129	13.0732	13.6	13.4341	12.7599	13.3151	12.3711
LE01Gene00590	12.3442	12.144	12.4674	13.5103	13.7091	13.6577	14.1469	14.1267	14.3575	12.0942	11.6948	12.1415	13.6164	13.9519	13.8477	14.0591	13.9467	13.94
LE01Gene00591	5.63212	5.06929	5.93192	8.28098	7.58039	8.05939	8.04582	7.85095	8.20234	4.35154	3.7578	4.09931	7.03416	6.80917	6.73278	7.00189	6.78906	7.95071
LE01Gene00592	10.0671	9.83913	10.2048	10.8329	10.3913	10.9179	10.6537	10.4088	10.6124	10.0407	10.3411	9.95068	11.1456	10.9266	10.5761	10.791	10.3749	11.0601
LE01Gene00593	8.59976	8.71313	8.75275	7.71262	8.25387	8.01226	7.67818	8.00493	8.22962	7.84608	7.59788	7.03485	7.56999	6.75855	6.94116	7.3593	6.05611	7.1904
LE01Gene00594	12.5455	12.148	12.4026	11.6714	11.9179	11.5854	11.7402	12.2478	11.8043	11.8652	11.9178	11.9348	11.6202	11.3155	11.8553	11.8348	11.4616	11.0702
LE01Gene00595	6.89345	6.66672	7.26543	7.51486	7.53755	7.22493	8.33855	7.82471	8.07575	6.80302	7.23231	6.72671	7.63934	7.63048	7.57004	7.18113	7.44276	7.17064
LE01Gene00596	9.02554	9.1306	8.7251	9.50277	9.21345	9.17314	9.24984	9.40321	9.49346	8.78062	8.52035	8.5243	7.976	7.82133	8.01809	8.6722	8.12551	9.02411
LE01Gene00600	8.92495	9.44806	9.0137	9.28106	9.03758	8.87836	9.47559	9.37863	9.41005	9.04735	8.62618	9.04873	8.72775	9.12076	8.67597	8.48006	9.27578	9.30356
LE01Gene00601	10.8744	10.9134	10.9359	11.1573	11.2949	11.263	11.4163	11.4502	11.4767	10.7426	10.895	10.9595	11.1815	11.1338	11.0481	11.1205	11.0569	11.2445
LE01Gene00602	11.707	12.1116	11.5746	10.8395	11.0603	10.7948	10.9116	10.9447	10.9434	11.8644	11.6944	11.5556	11.2798	11.4831	11.2653	11.0487	11.4877	10.8998
LE01Gene00603	11.124	10.8285	10.9937	11.8211	11.5411	11.5354	11.3285	11.4587	11.2793	10.8753	10.9324	10.7816	12.0091	11.4015	11.3927	11.6248	11.3981	11.6173
LE01Gene00604	6.63066	5.7722	6.47987	12.2509	10.5152	12.1931	13.4686	11.0197	13.5798	6.14757	5.67551	7.03485	11.0367	12.6225	11.1715	13.1565	13.7577	12.4875
LE01Gene00605	11.047	10.8727	10.6864	10.9423	11.066	10.7121	11.0996	11.209	11.0235	10.6893	10.8942	10.7939	11.3769	11.0717	11.4943	11.7719	11.1635	11.2171
LE01Gene00606	8.5452	8.4814	8.14956	8.74784	8.32697	8.28762	8.94351	8.46601	8.37356	8.32797	8.10662	8.18246	8.22189	8.00622	7.74694	8.18143	7.89098	8.41696
LE01Gene00607	10.4809	10.3078	10.4241	10.8717	10.4656	10.8761	10.4168	10.3059	10.6861	10.1764	9.91816	10.0624	10.5106	9.74847	10.0677	10.0723	9.53384	10.8968
LE01Gene00608	11.7321	11.4515	11.6911	11.2521	11.4063	11.0916	10.9886	11.3821	10.9888	11.9219	11.8751	11.9466	11.6064	11.5474	11.5786	11.5989	11.2596	11.2575
LE01Gene00609	9.0984	9.2121	9.29436	10.8329	10.5234	10.7243	10.5732	10.3188	10.391	9.13714	8.44257	9.02098	10.5153	10.2828	10.1695	10.1817	10.2746	11.0541
LE01Gene00610	9.95259	9.87048	10.0437	10.4138	10.476	10.5872	10.5698	10.5436	10.5081	9.18123	9.38958	9.04873	10.2901	9.79158	9.94905	10.0808	10.1628	10.4583
LE01Gene00611	11.0015	10.9543	11.0052	11.1183	11.1087	11.2479	11.0435	11.0247	11.0536	10.438	10.5696	10.2875	10.3981	10.3182	10.6623	10.5755	10.8416	10.7924
LE01Gene00612	11.6508	11.6734	11.4383	10.4904	10.6181	10.5035	10.4941	10.4778	10.3874	11.9377	12.1566	12.0931	11.2418	11.2269	11.3361	11.7454	11.2347	10.7622
LE01Gene00613	10.6633	11.0297	10.5004	9.31188	9.53716	9.38528	9.34711	9.44041	9.386	10.8923	10.641	10.5104	9.22399	9.42046	9.22406	9.06653	9.60523	9.07017
LE01Gene00614	7.17077	7.17702	6.6065	6.21679	6.77165	6.72491	5.97436	6.43115	5.97402	7.35829	7.23231	7.32538	5.63395	6.29122	6.11213	6.76941	6.64161	6.0352
LE01Gene00615	10.432	10.5062	10.2984	9.92858	10.1317	10.0618	9.78823	10.0915	9.81499	10.4094	10.2227	10.3311	9.92107	10.098	10.3205	10.1032	10.1762	10.1341
LE01Gene00616	9.73523	9.6335	9.80048	9.67681	9.53172	9.53912	9.35515	9.74322	9.45236	10.1739	9.59049	9.90738	9.29233	9.12076	9.60125	9.61497	8.7399	9.37222
LE01Gene00617	12.4335	12.4713	12.6018	12.4735	12.611	12.5082	12.0365	12.6827	12.0801	12.6145	12.3289	12.2581	12.0897	11.3067	11.7027	11.5094	11.1588	11.6323
LE01Gene00618	6.43447	7.196	5.79678	5.53833	5.36218	5.71252	6.54229	6.1645	5.81018	6.20565	6.53209	6.33435	5.78849	2.76525	5.71825	5.78257	6.2106	5.27631
LE01Gene00619	7.00883	7.15779	7.25687	9.07809	8.97206	9.35831	9.73582	9.09285	9.51358	6.73891	6.79253	6.26034	8.10907	8.86375	7.8014	8.35022	9.12848	8.79482
LE01Gene00620	11.0241	11.1385	11.072	11.7075	11.568	11.8121	11.4517	11.3787	11.4251	10.992	10.7081	10.8486	11.5911	11.0283	11.2574	11.4022	11.0786	11.376
LE01Gene00621	8.81395	9.527	9.25193	9.54929	9.49487	9.64418	9.26983	9.27828	9.18044	8.90561	8.46635	8.5786	8.98116	8.44274	8.51012	8.42329	8.9362	8.98504
LE01Gene00622	8.24492	8.13809	8.43772	10.0262	9.43582	9.64418	9.83689	9.60168	9.70847	8.07105	8.20413	8.18246	9.5714	9.10059	9.87163	9.26843	9.20401	9.87942
LE01Gene00623	9.15416	9.17192	9.42613	13.1699	12.8909	12.8748	12.9919	12.6295	12.6904	8.34099	8.05005	8.52034	12.8873	11.8588	12.9998	12.0473	11.3068	13.3199
LE01Gene00624	12.8967	13.0152	12.9414	12.8344	12.5425	12.7059	11.9613	12.0795	11.9936	12.8835	12.6726	12.4893	12.484	11.6998	12.1	12.339	11.9423	12.1002
LE01Gene00625	10.99	10.7616	10.8121	10.4127	10.5948	10.7785	10.5395	11.0539	10.5946	11.163	11.1456	11.4262	11.3215	11.224	11.6166	11.3399	10.8356	11.1083
LE01Gene00626	15.0972	14.7867	15.0606	15.2956	15.1153	15.395	15.1844	14.9755	14.9838	17.946	18.129	18.5262	18.1328	18.1055	18.8973	18.7312	18.1627	17.7542
LE01Gene00627	11.5282	11.4769	11.3283	11.9937	12.0562	11.9862	12.2293	12.0826	11.9541	10.6028	10.5905	10.3345	11.382	11.1651	10.8024	10.4379	11.1007	11.6031
LE01Gene00628	11.2768	11.2483	11.8346	12.786	12.4161	12.7814	12.678	12.2435	12.5736	11.0145	10.6548	10.6528	12.2957	11.799	11.6378	12.072	11.7379	12.4694
LE01Gene00629	11.5021	11.414	11.3036	11.1196	11.071	11.1326	11.5502	11.1925	11.1294	11.7625	11.8311	11.8967	11.5004	11.522	11.7393	11.7889	11.515	11.2165
LE01Gene00630	11.0476	11.442	11.0224	10.4387	10.5878	10.2291	10.0284	10.665	10.1917	11.439	11.4213	11.0377	10.1307	10.0929	10.2278	10.4324	10.5171	10.3327
LE01Gene00631	10.5035	10.8293	10.3646	9.06979	9.57825	9.0385	9.02976	9.67326	8.85564	10.5299	10.232	9.51041	8.5874	8.37296	8.73661	9.14424	8.50411	8.51033
LE01Gene00632	11.3596	11.9658	11.6771	11.7822	11.8159	11.7304	12.1518	12.0419	11.7336	11.8489	11.6998	11.6171	11.3019	11.3655	11.5941	11.2784	11.7301	11.8057
LE01Gene00633	14.9246	15.3859	15.1916	15.3602	15.1984	15.283	15.4384	15.0531	15.1042	15.0941	14.8669	14.9523	15.1217	15.2587	15.2171	14.9016	15.6658	15.5213
LE01Gene00634	11.2705	11.1944	11.3314	11.2533	11.2065	11.2118	11.0964	11.1429	11.0816	11.1302	10.9613	10.6938	10.9042	11.3372	11.15	10.8593	11.2815	11.2738
LE01Gene00635	9.87175	9.71306	9.83682	9.79061	9.97865	9.64761	10.0746	9.67877	10.018	9.44706	8.83237	8.74387	9.05154	8.63387	9.09649	8.91324	8.85484	9.40431
LE01Gene00636	10.5767	10.7751	10.9006	12.7464	12.1379	12.5764	13.3514	12.3944	13.0656	10.2937	9.96759	9.98123	11.2284	11.7044	11.2341	11.4078	11.884	12.1593
LE01Gene00637	10.8724	10.8519	10.9565	11.2582	11.4255	11.3806	11.8547	11.8556	11.7966	11.3387	11.4959	11.6474	11.7497	11.5357	11.6331	11.9766	11.547	11.3366
LE01Gene00638	14.256	13.8724	14.922	15.2764	15.6513	15.3287	15.1578	15.9052	15.116	13.3172	13.5191	13.419	15.0713	15.0557	14.7591	14.7386	14.7659	14.9405
LE01Gene00639	10.6153	10.8459	10.5327	10.5463	11.1684	10.8308	10.6699	11.0398	10.8374	10.6663	10.699	10.6125	10.6491	10.6821	10.4989	10.7463	10.7715	10.8564
LE01Gene00640	12.5383	12.1218	11.9071	10.8362	11.0578	10.7855	10.5709	10.9101	10.7202	12.5753	12.763	12.7673	11.5221	11.0435	11.9012	11.9424	11.0693	10.9456
LE01Gene00641	3.18573	0	0	2.62467	0	2.52674	0	0	0	0	0	0	3.61221	0	0	3.77787	2.67174	0
LE01Gene00642	6.97827	6.04764	6.13234	8.83204	8.18151	8.83087	8.89287	8.31399	9.03027	6.46543	6.40661	6.56704	8.37612	8.25469	8.67597	7.79067	7.48663	8.05679
LE01Gene00643	10.551	10.4608	10.5616	10.9286	10.8906	10.8072	12.3609	10.9463	11.6999	10.7179	10.6805	10.4586	10.0792	10.6512	10.2803	10.6677	10.8246	10.2807
LE01Gene00644	12.0296	12.4928	12.3626	13.2762	12.4483	12.364	14.5463	12.8895	13.662	12.4485	12.1077	12.0957	12.3008	13.5413	12.7163	12.104	14.4585	14.3655
LE01Gene00645	7.68775	8.82098	8.36394	11.0782	9.90192	10.2608	12.7878	10.706	12.0898	8.57565	8.37299	8.80371	9.81416	11.7476	10.5123	10.1511	12.4564	12.4292
LE01Gene00646	12.1771	12.3626	12.2723	11.88	11.8546	11.8022	11.6543	11.8146	11.6406	12.4314	12.1832	12.2205	11.699	11.7657	12.1255	11.8031	12.1067	11.4679
LE01Gene00647	8.34813	8.01525	8.16336	10.6145	10.2134	8.57027	9.0163	8.83145	7.93698	6.65801	7.41448	7.64187	9.43373	8.61976	8.84104	9.30273	9.84993	10.1251
LE01Gene00648	12.5879	12.3481	12.3725	11.2472	11.5578	11.2697	10.811	11.5049	11.0536	12.5684	12.559	12.219	11.839	12.2685	11.3993	11.8695	12.0047	11.2761
LE01Gene00649	5.82767	6.16786	7.00427	7.96021	7.40082	7.55227	8.06556	7.76388	7.79077	6.43338	6.17611	5.26018	8.31385	7.88759	7.4894	8.06637	7.57057	8.16062
LE01Gene00650	10.223	10.3967	10.9898	13.084	12.4938	12.9	12.9644	12.0704	12.9127	10.0683	9.20639	10.1585	12.3461	12.0229	11.7143	12.0364	11.9704	12.488
LE01Gene00651	10.4025	10.1293	10.4868	10.375	10.3236	10.4525	10.6005	10.3932	10.48	10.6243	10.7402	11.2468	10.7521	10.5244	10.94	10.6817	10.2276	10.3272
LE01Gene00652	9.7817	9.73269	9.64358	8.90228	8.88645	9.11485	8.78986	9.11738	9.29852	11.4851	11.9156	11.2061	10.8119	11.2315	10.8969	10.903	11.0678	10.3493
LE01Gene00653	5.43614	4.89443	5.25942	5.66127	5.73511	6.15963	6.27484	6.03318	6.23323	5.24367	5.67551	5.5669	6.01412	6.36073	6.19582	5.8896	6.27207	6.31271
LE01Gene00654	10.3064	10.0905	10.1981	9.20982	9.43193	9.47104	9.30346	9.6113	9.09401	10.5911	10.6093	10.5585	9.88297	9.02766	9.24877	9.76308	9.18549	8.68069
LE01Gene00655	8.06755	7.63199	8.02911	8.9085	8.48564	8.18275	8.56801	8.09549	7.66049	7.99624	7.81098	8.25094	8.17127	8.18454	7.44733	7.2926	7.83777	8.59802
LE01Gene00656	11.6685	11.3439	11.9234	12.2077	12.0142	12.1775	12.2061	11.8781	12.1866	11.7402	11.9167	12.1454	12.2275	11.9627	12.0551	12.0638	11.87	11.8514
LE01Gene00657	10.1218	10.6923	10.2037	8.50271	10.7405	8.82785	8.28344	11.8146	8.92404	10.9712	10.8979	10.1875	9.13795	9.44867	10.1328	9.25348	9.41852	9.43569
LE01Gene00658	10.2154	10.0804	10.2421	10.4852	10.5069	10.9571	10.6005	10.2342	10.4675	10.0761	10.5362	9.97257	10.9452	10.7892	10.4412	9.98448	10.6053	10.7737
LE01Gene00659	12.2139	12.7431	12.0192	10.8709	11.1196	10.8239	10.5949	11.2001	10.7478	12.2981	11.9599	11.966	10.6683	10.8494	10.4031	10.4434	11.1729	11.0262
LE01Gene00660	11.8799	11.8413	11.578	10.7746	11.066	10.7691	10.5675	11.2717	10.602	11.3279	11.3586	11.4633	10.854	10.801	10.8827	10.5654	10.4915	10.6345
LE01Gene00661	12.5243	12.4529	12.4899	12.3398	12.3519	12.4272	12.2582	12.1721	12.1446	12.5949	12.5987	12.6431	12.52	12.3061	12.3943	12.3408	12.07	12.56
LE01Gene00662	10.2732	10.6848	10.3436	9.17929	9.48738	9.35202	9.36314	9.30225	9.25935	10.6437	10.5117	10.1737	9.49301	9.39791	9.4064	9.57544	9.80385	9.20013
LE01Gene00663	11.8209	11.7958	11.71	11.4648	11.7459	11.3862	10.9963	11.5749	10.9201	11.3031	11.59	10.9689	11.1094	11.2304	11.1101	10.9823	11.3837	11.1232
LE01Gene00664	11.1783	11.4817	11.1147	10.7703	10.7467	10.7722	10.7584	10.6585	10.5777	11.3991	11.2057	11.2658	10.7003	10.5301	10.7652	10.6267	10.8659	10.692
LE01Gene00665	9.6634	9.84966	9.7465	10.1985	9.81041	9.96059	9.9456	9.38313	9.99272	10.2004	9.95224	10.0773	10.0829	9.62677	10.0168	9.64583	9.02219	10.0158
LE01Gene00666	10.5008	10.5703	10.9723	12.0657	11.6486	11.9585	11.5589	10.9897	11.4647	10.2356	10.2274	10.3379	11.5304	10.8852	10.7271	10.6354	10.6407	11.4403
LE01Gene00667	13.7903	13.439	13.0171	11.6442	11.5234	11.8018	11.09	11.1541	11.2469	13.7519	14.0013	13.59	12.1777	11.7841	11.6628	11.9984	11.7679	11.3137
LE01Gene00668	8.63284	8.36884	9.09756	10.0531	10.0641	10.1778	10.081	10.2735	10.1452	7.94601	8.55773	8.69203	10.2793	10.0632	10.106	9.93692	9.59924	10.4684
LE01Gene00669	11.1362	12.775	11.8506	8.58266	9.46469	8.80652	8.47761	8.44032	9.03337	12.3732	12.1691	12.3393	9.91968	11.0108	10.6586	10.117	11.413	8.51817
LE01Gene00670	6.0788	6.18696	4.91242	6.80197	6.48644	6.34009	6.65078	6.57974	6.04946	4.86549	5.15749	2.59545	5.71329	4.47649	4.62977	5.54128	4.34619	5.34845
LE01Gene00671	9.84235	9.66619	9.86243	9.73045	9.57119	10.0041	9.66644	9.8912	9.54215	9.51563	9.35603	8.86742	9.49675	8.69906	8.88897	9.75071	9.29811	9.12767
LE01Gene00672	12.3562	11.9826	12.458	12.9675	12.7208	12.8866	12.4332	12.5461	12.3707	11.7765	11.8208	11.7637	12.425	11.6855	11.8066	12.0875	11.4572	12.499
LE01Gene00673	10.2669	10.0688	10.5309	10.2739	10.5225	10.4854	10.5994	10.1336	11.1215	10.1532	9.70818	10.2664	10.4376	10.7098	10.3275	10.6003	10.8416	10.291
LE01Gene00674	11.5728	11.4386	11.6602	10.6511	10.9124	10.6321	9.52631	10.3106	10.0823	11.7544	11.8081	11.9726	10.8822	10.4446	11.4735	11.5548	10.5022	9.67367
LE01Gene00675	10.055	9.69316	9.6599	9.53529	9.59402	9.59527	9.65346	9.67694	9.54433	9.437	9.74266	9.91645	9.32216	9.28622	10.1408	9.85839	9.09485	9.52011
LE01Gene00676	10.997	10.9543	11.2874	11.1858	11.4127	11.2786	11.5093	11.5157	11.4721	11.1992	11.1706	11.4853	11.4934	11.5951	11.8087	11.4877	11.5958	11.5836
LE01Gene00677	12.4475	12.1455	12.6785	12.5085	12.7098	12.5811	12.5845	12.614	12.4219	12.5992	12.58	12.908	12.7501	12.715	12.6978	12.7282	12.5524	12.725
LE01Gene00678	10.1287	10.6421	10.8121	12.0147	11.952	12.018	12.3183	12.0998	12.0138	9.78851	9.33251	9.40058	11.2086	11.0128	10.7209	10.9189	10.9869	11.6688
LE01Gene00679	12.9802	13.2028	12.8971	12.3043	13.6369	12.7616	12.463	14.546	12.3547	12.9301	12.76	12.3138	12.7465	12.179	12.6154	11.3387	11.3443	11.6776
LE01Gene00680	11.3027	11.1094	11.0805	9.87719	10.0629	9.94115	9.87839	10.6152	10.0382	11.2604	11.3459	11.1172	10.2194	9.72889	9.94603	10.085	9.66373	9.87485
LE01Gene00681	11.1454	10.6071	11.1584	11.5268	11.3933	11.5247	11.4906	11.6017	11.6222	10.6885	10.5259	10.9769	11.3263	10.9216	11.3182	11.0262	10.6705	11.1531
LE01Gene00682	8.82257	8.60369	8.35995	8.74784	9.05541	9.27426	9.49512	10.2001	9.54215	8.6715	8.27316	8.54002	9.02069	9.93807	10.0635	10.6354	10.5547	10.0541
LE01Gene00683	10.0167	10.1647	10.7186	11.4165	10.9325	11.3006	11.764	11.1025	11.4998	9.76617	9.66087	9.86432	11.1396	11.6272	10.6335	11.8086	11.7856	11.4644
LE01Gene00684	11.0334	11.2265	11.263	12.2784	12.0862	12.1981	12.1987	11.8762	12.116	10.7829	10.5859	11.1457	12.0348	11.88	11.731	11.6497	11.8613	12.513
LE01Gene00685	10.6472	10.5213	10.5985	10.0864	10.5022	10.0618	10.1412	10.4231	10.1031	10.8221	10.8015	10.7104	10.3041	10.1517	10.4217	10.3292	10.0133	10.2563
LE01Gene00686	7.95695	8.60724	7.71607	7.73379	7.65577	7.87266	8.16648	7.86389	8.11725	7.58673	8.10157	7.24132	7.66617	8.1506	7.74694	8.089	7.57057	7.20018
LE01Gene00687	16.5806	16.3672	16.1995	16.8442	16.8332	16.8893	16.7995	16.719	17.1228	16.2422	16.3322	16.3731	16.7587	16.7217	16.6267	17.0255	16.8829	17.0923
LE01Gene00688	13.1774	13.1906	13.0433	13.1995	13.2144	13.2822	13.322	13.1173	13.4815	13.1286	13.2354	13.1964	13.2792	13.1809	13.2598	13.0863	13.1255	13.3065
LE01Gene00689	12.2076	12.2068	12.1595	12.0411	12.2071	12.0729	12.1005	12.1008	11.8079	12.2686	12.3504	12.1043	11.971	11.905	11.8411	11.7316	11.9941	11.985
LE01Gene00690	11.6078	11.5902	11.2147	10.0671	10.5852	10.3006	10.1489	10.6492	10.1581	11.8394	11.9095	11.9378	10.9063	10.2929	10.8685	10.6487	10.2784	9.95212
LE01Gene00691	10.6415	11.1446	10.9419	11.8697	11.7349	11.9736	11.8232	11.6347	11.7689	10.5965	10.5409	10.5633	11.4726	11.502	11.1067	11.2692	11.5345	12.1047
LE01Gene00692	12.2289	11.904	12.0517	11.4193	11.6078	11.4724	11.3528	11.7476	11.4874	12.4329	13.0159	12.9776	12.1884	12.7425	12.6359	12.1565	12.4327	11.656
LE01Gene00693	7.90373	8.10834	7.47914	8.20722	8.65887	8.78799	9.10479	9.07349	9.35165	7.57209	8.00205	8.09468	8.76856	9.27501	8.60119	8.51809	8.9042	8.29903
LE01Gene00694	5.40584	5.66731	5.84325	5.60111	5.73511	3.84152	3.84248	2.85616	5.02198	5.31577	4.75586	5.18216	6.09535	4.34545	2.35943	4.2491	5.85656	4.94516
LE01Gene00695	11.5003	11.0428	10.9995	10.6343	10.7907	10.7348	10.7391	10.8705	10.7336	11.2931	11.5548	11.5179	11.1474	10.9918	11.4032	11.3874	10.5993	10.7075
LE01Gene00696	9.55367	9.61776	9.67122	10.1041	9.96255	9.99061	10.3393	9.86247	10.0837	9.55898	9.10905	9.07595	9.61853	9.46257	9.82311	9.50774	9.44545	9.81245
LE01Gene00697	11.79	11.2357	11.5818	11.2311	11.0534	11.2072	11.1521	11.1235	11.0313	12.206	12.2455	12.6362	12.0045	11.8785	12.0269	12.4481	12.1074	11.4511
LE01Gene00698	12.3969	12.2371	12.3329	11.0892	11.4731	11.2847	11.2517	11.7283	11.4744	12.8938	13.0185	12.8461	11.98	12.4171	12.1779	12.0085	12.2545	11.6072
LE01Gene00699	12.0178	12.0379	11.856	11.5503	11.5452	11.3867	11.1613	11.687	11.3007	11.7729	11.7426	11.4294	11.408	10.978	11.4518	11.0196	10.7464	11.485
LE01Gene00700	9.55884	9.16231	8.39547	8.19201	0	8.2247	8.03919	7.50768	8.01432	10.038	9.80616	8.85804	8.16188	7.8817	7.63145	8.30743	7.94858	8.56434
LE01Gene00701	10.6569	10.7584	11.0268	12.1573	12.021	12.2187	12.1328	12.2472	11.9647	10.6489	10.404	10.6273	12.2317	11.8387	12.0639	11.956	11.8762	12.7677
LE01Gene00702	6.65663	6.3652	6.71043	8.43969	8.0249	8.20621	8.07857	7.90203	7.99537	5.20623	6.15675	6.2792	9.77771	8.33461	8.35492	8.98439	8.5295	9.35262
LE01Gene00703	10.4404	10.5298	10.3191	10.4516	10.2712	10.5139	10.4271	10.2963	10.5214	10.1776	9.85951	9.76912	10.3126	10.5811	9.83946	10.4324	10.5629	10.5915
LE01Gene00704	10.7578	10.9354	10.9245	11.3207	11.0578	10.994	11.2035	10.9194	11.0506	10.0852	10.654	10.6365	11.1575	11.3193	11.2097	11.1383	11.6344	11.5049
LE01Gene00705	12.2498	12.7006	12.4604	11.2193	11.2246	11.2153	10.5847	10.8389	11.1631	12.4866	12.1594	12.2229	11.39	11.2321	11.551	11.574	11.5308	11.2001
LE01Gene00706	9.3499	9.17671	9.51314	10.7788	10.5013	10.8072	10.8071	10.5264	10.7134	8.87312	8.82012	9.01818	10.4511	10.1257	10.0382	10.0393	10.1451	11.0466
LE01Gene00707	8.9488	8.87791	9.35575	9.4653	9.37223	9.31366	9.42301	9.57635	9.13787	8.36242	8.56141	7.18242	8.9542	9.00341	8.6796	8.97227	8.69946	9.07815
LE01Gene00708	11.7457	11.3412	11.1294	10.4977	10.7198	10.2842	10.2093	10.7309	10.3229	11.645	11.8792	11.8375	10.9369	10.6998	11.1734	11.0581	10.3889	10.3548
LE01Gene00709	11.3948	11.1416	11.0781	10.7881	10.6139	10.8636	10.7604	10.6669	10.5237	11.7377	11.9762	12.1168	11.4674	11.3307	11.7907	11.4824	10.9677	10.8587
LE01Gene00710	10.4837	10.6848	11.1004	12.1323	11.7565	11.976	12.2391	11.825	11.9732	10.5838	10.5428	10.8447	11.9355	11.8999	11.9221	12.199	12.1916	12.4775
LE01Gene00711	7.72504	7.89846	7.78315	9.84998	9.41033	9.80337	9.62714	9.19879	9.68106	6.81551	6.37346	6.93134	8.86726	8.50163	8.50192	8.53467	8.07467	9.12511
LE01Gene00712	11.6597	11.6421	11.4674	11.3857	11.3542	11.4387	11.5537	11.5177	11.737	11.9483	11.8193	11.8925	11.2954	11.5442	11.3771	11.579	11.4522	11.3937
LE01Gene00713	8.2277	8.57135	8.25644	8.59428	7.99882	8.09501	8.65308	8.53641	8.89366	9.20989	9.18267	9.25573	9.17345	9.17965	8.96847	8.23316	8.92029	8.76876
LE01Gene00714	10.8409	11.4524	10.9975	9.94531	10.1365	10.0411	9.94027	9.93937	9.97025	11.3026	11.0603	10.8415	9.95683	10.2929	10.2427	10.2397	10.5516	10.2853
LE01Gene00715	10.3043	10.2329	10.3395	9.43761	9.77088	9.24285	9.25844	9.73444	9.48669	10.8633	10.7312	10.7783	9.49488	9.77099	10.2779	10.032	9.78113	9.30129
LE01Gene00716	10.5177	10.2375	10.5076	10.1068	10.1209	9.99735	9.69206	9.88009	9.82575	10.3246	10.1621	10.4628	10.4366	9.83803	10.1862	10.401	9.55253	10.0487
LE01Gene00717	9.25747	9.60893	9.57123	9.86924	9.82977	9.82928	9.91148	9.88009	10.0227	9.19802	8.99379	9.60315	10.3051	9.5563	9.93998	10.1698	9.96451	10.2621
LE01Gene00718	12.0689	12.1706	12.1658	11.1671	11.6074	11.2792	11.2716	11.7208	11.3673	12.3668	12.1168	12.1279	11.3093	11.4107	11.553	11.4824	11.4632	11.2807
LE01Gene00719	10.4727	10.3057	10.5857	10.8338	10.9605	10.9481	10.8617	11.1957	10.602	10.3279	10.1165	10.0624	10.8943	10.7509	10.8764	10.5441	10.6818	11.0296
LE01Gene00720	13.8348	13.7112	13.504	13.3697	13.2195	13.318	13.4095	13.3057	13.3289	14.1151	14.2172	14.1801	13.6545	13.7193	13.403	13.895	13.8781	13.2759
LE01Gene00721	9.56399	9.85115	9.69358	8.63611	8.91742	8.54842	8.33855	8.48708	8.61615	9.31257	9.21109	9.10002	8.10907	8.1358	7.49767	8.46283	8.4161	8.09399
LE01Gene00722	10.2805	10.5251	10.4656	9.84188	10.0142	9.90003	9.74605	10.3364	9.88014	10.7129	10.8884	10.5488	10.1534	10.9273	10.4465	9.79613	10.8533	10.3711
LE01Gene00723	10.7427	10.9446	10.7624	9.46951	9.91732	9.42979	9.58902	9.68607	9.45236	12.0683	12.2853	11.8082	9.89295	10.0541	10.0339	9.97539	9.63867	9.98644
LE01Gene00724	12.0374	11.9925	12.238	11.7843	11.8806	11.9592	11.9985	12.0022	12.0869	11.9444	12.1162	12.2528	12.1896	12.3508	12.0687	12.083	12.2609	11.9715
LE01Gene00725	6.89345	6.75894	6.75972	5.04605	6.57384	6.12066	6.3411	6.51558	6.47128	7.88807	7.75416	6.91937	7.11429	8.07505	7.63145	6.5422	8.40699	6.64897
LE01Gene00726	13.8271	13.8753	13.9083	13.6891	14.1743	13.961	14.1063	14.1607	14.2424	14.1039	14.2154	13.947	13.5276	13.7706	13.3056	13.6588	13.5658	13.5049
LE01Gene00727	9.14959	9.29144	9.04882	7.44812	7.86082	8.13466	7.42676	8.16511	7.34833	9.02332	8.66437	8.73365	7.37233	7.36044	5.92859	7.12747	7.21133	5.89771
LE01Gene00728	11.1933	11.3295	11.3824	10.8476	10.8969	10.6433	10.579	11.0197	10.7364	10.826	10.723	10.4315	10.3441	10.4576	9.96703	10.3817	10.297	10.1404
LE01Gene00729	10.8359	11.2471	11.4632	10.8788	9.93668	10.5719	10.3243	9.34672	10.1509	9.85353	9.98004	9.83115	9.91549	10.3958	8.05777	8.91007	10.8783	10.2772
LE01Gene00730	13.3824	13.2305	13.0512	11.8957	11.9176	11.8476	11.6494	12.1409	11.852	13.3762	13.5732	13.3901	12.076	12.1547	12.1027	12.334	12.0423	12.0765
LE01Gene00731	10.072	9.87637	10.3567	10.5533	10.152	10.3308	10.6084	10.3865	10.4777	10.278	10.2685	9.71992	10.41	10.5774	10.1328	10.5151	10.8799	10.6109
LE01Gene00732	9.94602	10.0663	10.0338	10.4333	10.1602	10.4218	10.4334	10.0943	10.2083	10.0631	9.99101	9.90131	10.0591	10.4822	10.1708	9.84349	10.4118	9.97794
LE01Gene00733	10.7405	10.5251	11.29	13.082	12.6123	13.1399	12.9291	12.2717	12.8599	10.754	10.9599	11.8131	13.3223	13.2572	12.8955	13.4534	13.2569	13.2691
LE01Gene00734	11.176	11.013	10.9472	10.789	10.918	10.8899	10.9826	10.9569	11.0196	11.2649	11.5112	11.6591	11.2017	11.3301	11.55	11.1464	10.9953	10.8525
LE01Gene00735	11.0634	11.2947	11.0462	11.2268	11.4206	11.3898	11.5984	11.5259	11.3556	11.4006	11.1718	11.4151	11.2733	11.4331	11.5097	11.106	11.3638	11.671
LE01Gene00736	11.0506	11.2114	10.7834	11.9279	11.4971	11.6931	11.8642	11.3479	11.7135	11.1439	10.6872	11.0624	11.6055	11.3947	11.2303	11.3874	11.316	11.8081
LE01Gene00737	9.31974	9.10322	9.41464	11.9893	11.4512	11.8844	12.1788	11.3017	12.2366	8.60112	8.61558	8.97256	11.1051	11.3301	10.6878	11.4257	11.6903	11.9914
LE01Gene00738	8.30363	8.2005	8.47878	11.4579	10.0285	11.9327	13.7733	11.2497	13.7557	8.32361	7.9524	7.90127	10.6649	11.8543	10.372	14.0802	13.9637	13.5405
LE01Gene00739	9.18348	8.70653	9.07826	12.0956	10.9304	12.2954	12.2278	10.82	12.6353	7.54234	8.67801	8.76074	10.6296	11.2912	10.4582	12.2123	11.7401	12.1439
LE01Gene00740	13.4036	13.2278	12.841	12.304	12.2229	12.2294	11.9648	12.1165	11.7355	12.66	13.0073	12.7752	12.8212	12.3369	12.1255	13.2758	13.1262	11.7871
LE01Gene00741	12.2267	12.8632	11.8655	10.299	10.851	10.1944	10.224	10.8975	10.3886	12.7912	12.5004	12.3677	10.5749	10.632	10.9332	10.5492	10.803	10.3722
LE01Gene00742	11.2208	11.345	11.0567	10.4894	10.3382	10.4816	10.4585	10.2317	10.5455	11.1057	10.9059	10.8447	10.0219	9.87264	10.0197	10.1157	10.1546	10.1556
LE01Gene00743	15.4916	15.3169	14.7409	13.1776	13.3741	13.2282	12.3602	12.9938	12.5046	15.3802	15.3389	15.18	13.0689	12.3431	12.9857	12.4663	12.4036	12.2138
LE01Gene00744	11.3135	11.6062	11.2442	10.1176	10.3204	10.2842	9.91511	10.3798	9.68304	11.8352	11.6353	11.4214	9.9609	9.77417	10.2116	9.68722	9.73094	9.9977
LE01Gene00745	6.60421	6.78424	7.34832	7.29513	8.09552	7.76937	7.58098	7.69313	7.96322	6.75196	6.57647	7.01248	7.48211	7.23648	7.03505	7.92254	7.74688	7.63457
LE01Gene00746	10.3939	10.6755	10.5797	11.2435	10.8349	11.1629	11.0023	10.3153	11.1863	10.7483	11.34	10.8914	11.4438	12.0455	11.6037	11.6131	11.9261	11.5039
LE01Gene00747	13.7876	14.0537	13.5322	11.7877	12.2283	11.7005	11.4623	12.2192	11.7154	13.9656	13.7314	13.6021	11.6982	11.6956	11.8537	11.8056	11.6576	11.552
LE01Gene00748	11.4863	11.5335	11.7517	12.8995	12.2602	12.478	12.9111	12.1419	12.6248	10.7287	10.8046	10.7034	11.5207	11.7841	11.1689	11.1981	11.5958	11.2627
LE01Gene00749	12.463	12.7435	12.4999	12.4387	12.3338	12.4051	12.7774	12.4375	12.6571	12.7753	12.5428	12.4151	11.9666	12.0903	12.0318	12.1257	12.2427	12.1709
LE01Gene00750	11.2752	11.0184	10.9749	10.3224	10.6818	10.6023	10.543	11.0015	10.3418	11.3934	11.5235	11.656	11.2171	10.897	11.2797	11.3393	10.8533	10.4985
LE01Gene00751	11.0464	10.8881	10.8595	10.4526	10.6777	10.3749	10.3487	10.9325	10.725	11.1189	11.4726	11.5396	10.7884	10.9409	11.1734	11.2673	11.0186	10.6045
LE01Gene00752	12.662	12.6389	12.5181	11.8194	11.9577	11.8379	11.9409	12.0788	12.108	13.2086	13.1135	13.1841	12.1887	12.4899	12.7549	12.8067	12.5742	12.2927
LE01Gene00753	12.6867	12.5481	12.4708	11.3277	11.796	11.3842	11.1583	11.832	11.2496	13.1433	13.3996	13.2623	12.3703	12.6889	12.9468	12.9781	12.834	11.8259
LE01Gene00754	12.4879	12.7294	11.9342	9.40279	10.4493	9.86361	9.46076	10.2128	9.69874	13.0586	13.393	13.1245	11.1994	11.3612	11.2279	10.8005	10.6417	10.4623
LE01Gene00755	12.9378	12.7482	12.8027	12.1816	12.2882	12.2602	12.0482	12.2552	11.8419	13.19	13.222	13.2261	12.6501	12.431	12.4756	12.2306	11.8704	12.3219
LE01Gene00756	11.6996	12.1915	11.8125	11.0496	11.0122	10.9249	10.6709	11.0784	10.5799	11.8618	11.5334	11.3968	11.0735	10.6796	10.7957	10.4145	10.8004	11.0775
LE01Gene00757	11.4935	11.2974	11.2114	10.2581	10.1997	10.1381	9.93133	10.3329	9.81499	11.4089	11.494	11.287	9.90426	9.66849	9.55644	9.43892	9.37249	9.37438
LE01Gene00758	10.3968	10.2271	10.2356	9.52521	9.54439	9.53912	9.7005	9.36504	9.45467	10.6091	10.5146	10.4903	9.8006	9.20822	9.81981	10.1856	9.67325	9.64352
LE01Gene00759	9.7594	8.94675	9.44509	8.63235	8.7555	8.8157	8.64872	8.56443	8.54408	9.93018	10.2786	10.5681	9.49862	9.15785	8.53444	9.77185	8.86485	8.26216
LE01Gene00760	8.23203	8.64225	7.87548	8.04168	7.77736	7.94694	7.92859	8.14934	7.84117	8.49255	8.56875	8.34793	8.83806	8.05422	8.1655	7.86469	7.62655	8.33942
LE01Gene00761	11.5826	11.7829	11.7471	11.8744	11.707	11.7703	12.1671	11.53	12.0987	11.836	11.6084	11.5184	11.454	11.6568	11.4406	11.4978	12.0566	11.7199
LE01Gene00762	10.7794	10.2892	10.2203	10.2161	10.6292	10.4347	10.0549	11.3628	9.65312	9.58292	10.0874	9.47813	8.73727	9.24315	9.31811	8.87468	8.76862	9.44806
LE01Gene00763	11.0549	11.7723	11.712	10.9024	11.2933	10.8892	10.8589	11.3685	10.8586	11.6314	11.273	11.2018	11.0685	10.7206	10.2066	10.7463	11.0179	10.7271
LE01Gene00764	11.5212	11.7423	11.8637	11.2877	11.2569	11.3398	11.2688	11.177	11.3331	11.683	11.6787	11.6636	11.4901	11.6174	11.4032	11.2174	11.6003	11.1817
LE01Gene00765	10.0266	9.54376	10.3232	9.64364	9.58878	9.47104	9.75215	9.44687	9.64706	9.65938	9.41831	9.12369	9.33685	9.28845	9.00663	9.32197	9.05169	8.56812
LE01Gene00766	9.97727	10.1268	10.3263	10.3951	10.715	10.6931	10.5971	10.9302	10.693	10.7797	10.785	10.7234	10.5589	10.6117	10.3064	11.1012	10.993	10.5869
LE01Gene00767	10.1956	10.8376	9.99182	9.67316	10.269	9.74371	9.84452	10.0109	9.83467	10.8641	10.5941	10.5498	9.94043	10.8111	11.0204	11.1491	11.3755	10.4835
LE01Gene00768	10.9154	10.6274	10.1527	10.1651	10.1789	10.0986	10.3962	10.2747	10.374	10.9157	11.3586	11.5149	11.3136	11.2005	11.1565	10.9838	10.8575	11.0344
LE01Gene00769	12.9031	13.5097	13.5091	13.6907	13.5506	13.4914	13.8364	13.2833	13.5276	13.0365	12.5002	12.8637	13.0328	13.4979	13.0347	13.0601	14.1625	13.9721
LE01Gene00770	11.5745	11.533	11.2003	10.4997	10.9235	10.6441	10.809	11.2198	10.833	11.5232	11.5488	11.4669	10.5651	10.3802	10.5965	10.429	10.2146	10.5491
LE01Gene00771	11.0929	10.7448	10.7811	10.3896	10.4191	10.3965	9.95445	10.8175	10.3089	10.6842	10.627	10.6645	10.2955	9.75171	10.4834	10.1856	9.44545	10.2807
LE01Gene00772	12.161	11.6898	11.6711	11.2527	11.5452	11.4097	11.1901	11.6655	11.4037	12.4268	12.5416	12.6761	11.8518	11.7496	12.0085	11.905	11.6053	11.2183
LE01Gene00773	11.6235	11.7423	11.5758	11.0719	10.8856	10.9129	10.9098	10.3921	11.2241	11.7058	11.2691	11.3558	10.6457	10.9842	10.6897	11.1437	11.3958	10.2374
LE01Gene00774	13.2978	13.5706	13.4185	13.0108	12.9613	12.9708	12.7292	12.7813	12.6785	13.5158	13.4513	13.5268	13.2447	13.2419	13.081	13.1511	13.4545	13.3074
LE01Gene00775	10.5995	10.5667	10.6295	9.907	9.93117	9.76598	9.94027	9.96512	9.89385	11.0637	10.7771	10.7566	10.0854	10.1119	10.5	10.2206	9.98301	10.268
LE01Gene00776	12.3705	11.9853	12.4367	12.0301	11.928	12.1653	11.9516	11.9975	12.1853	12.6252	12.6243	12.5931	12.3766	12.0376	11.8468	12.5475	12.368	11.7806
LE01Gene00777	12.3193	12.08	12.1543	10.8573	11.0872	10.8569	10.8042	11.1541	10.7563	12.3546	12.0613	11.7401	10.6533	10.4938	10.1721	10.7084	10.628	10.3526
LE01Gene00778	12.587	12.8379	12.328	10.8321	11.1448	10.7178	10.0351	10.2698	9.84176	12.4568	12.1829	11.8435	9.49862	9.04624	9.48337	9.50564	9.93789	8.78835
LE01Gene00779	10.5008	11.1933	10.9075	10.0573	10.0233	9.92569	9.94915	10.1692	9.83999	10.8167	10.5905	10.4006	9.86427	9.5414	9.81486	9.6208	10.2146	10.0554
LE01Gene00780	12.0649	12.0253	11.6569	10.9686	11.0239	10.9777	10.6482	10.8967	10.6603	11.8671	11.9497	11.8478	11.1414	10.5178	10.7882	11.0393	10.2067	10.5181
LE01Gene00781	10.4755	10.7496	10.4628	10.0754	10.3393	10.2653	9.93312	9.93324	9.84176	10.7278	10.1933	10.4462	9.87005	10.0182	9.95957	9.79956	9.99824	10.3416
LE01Gene00782	11.6451	11.9501	11.5564	10.6832	10.9692	10.7596	10.4001	11.2223	10.2542	11.9656	11.6539	11.5657	10.8134	10.3686	10.8297	10.5573	10.6619	10.9864
LE01Gene00783	12.8307	12.6249	12.9281	13.2064	13.0872	13.3114	13.1309	12.9674	13.2	12.4099	12.587	12.4209	13.4353	13.0603	12.75	12.6313	12.8981	13.6123
LE01Gene00784	6.0788	6.20581	5.86593	7.32334	7.40082	7.53013	6.89092	7.25608	7.59486	4.54393	5.34018	4.25985	6.61935	6.7194	6.7187	7.01377	6.57814	6.78517
LE01Gene00785	8.55213	8.51579	8.47878	9.01032	8.95317	9.0068	9.41021	8.79136	8.61615	8.2565	8.41432	8.32542	9.35346	8.61621	9.10192	9.01427	8.97368	9.41904
LE01Gene00789	8.34014	8.50822	8.34792	8.51906	8.58365	8.60245	8.79775	8.63407	8.6529	8.58297	8.43857	8.5824	8.64586	8.56559	8.73311	8.70554	8.82439	8.45012
LE01Gene00792	7.29997	8.05217	7.69722	8.16629	7.67567	7.09022	6.71883	6.7705	7.07508	7.82153	7.58346	7.16224	7.04442	5.8096	6.87921	6.47505	7.13619	6.33063
LE01Gene00793	12.2739	12.3428	12.139	10.6613	11.0578	10.6989	10.342	11.2185	10.6186	12.4927	12.4382	12.2867	11.0068	11.1772	11.4304	11.2397	11.2022	10.6182
LE01Gene00794	9.5116	10.0867	9.71872	9.13489	9.06801	9.1024	8.54007	8.99036	9.05183	9.72208	9.27532	9.40702	8.66262	8.74853	9.08556	8.39632	9.06622	9.11997
LE01Gene00795	11.3611	11.9938	11.8037	11.4307	11.6173	11.4529	11.6057	11.373	11.6638	11.5691	11.0499	10.9631	11.204	11.1018	11.0863	11.5508	11.7644	11.498
LE01Gene00796	11.2142	11.1391	11.1879	10.8231	10.9455	11.0134	10.7091	10.9264	10.725	10.582	10.4425	10.5777	10.5696	10.207	10.4603	10.1631	9.94262	10.4127
LE01Gene00797	10.2446	10.7286	10.5832	10.5303	10.2982	10.5593	10.8934	10.5705	10.8187	10.9437	10.6754	10.4576	10.5696	10.6897	10.4401	10.3445	10.5454	10.758
LE01Gene00798	14.0994	13.8674	13.7242	13.5364	13.487	13.6581	13.5304	13.7898	13.7016	13.741	13.7927	13.8255	13.5852	13.4697	13.7939	13.6047	13.1678	13.0786
LE01Gene00799	8.21901	8.10333	8.27775	7.87386	8.20452	8.17326	7.48654	8.33273	7.66049	8.09686	8.37299	7.15204	6.88223	5.50641	6.17535	6.8244	5.38637	6.43372
LE01Gene00800	9.91811	9.83913	10.2753	11.3621	11.1232	11.1725	11.1598	10.9689	10.9318	9.96001	9.6643	9.64738	10.5837	10.3999	10.4614	10.3492	10.4118	11.0775
LE01Gene00801	12.7468	13.0513	12.6346	11.8252	11.9383	11.7356	11.5443	12.043	11.5093	13.0466	12.7934	12.9042	11.5521	11.8395	11.6406	11.5141	11.7944	11.5869
LE01Gene00802	9.89648	9.88955	9.89036	10.3728	10.3671	10.1123	10.1365	10.2844	10.2382	9.52707	9.52028	9.64738	10.5642	10.1554	10.6118	10.5214	10.319	10.5347
LE01Gene00803	10.942	11.0435	11.2103	10.8247	10.8074	10.7754	10.7164	10.9046	10.744	10.8452	10.7288	10.5872	10.621	10.841	10.7314	10.6421	10.7644	10.7203
LE01Gene00804	11.4804	11.7339	11.5184	10.8346	11.2347	10.8812	10.5938	11.1802	10.6451	11.5482	10.9855	10.9668	9.47035	10.0276	9.91395	9.61497	10.1355	10.02
LE01Gene00805	16.7029	16.6517	16.3516	16.2826	16.6541	16.2441	15.9411	16.5521	15.9964	16.3789	16.4671	16.4059	15.5516	15.3197	15.7025	15.3965	15.4641	15.3184
LE01Gene00806	11.401	11.33	11.3676	11.0898	11.2782	11.1259	11.3741	11.4383	11.4801	11.6576	11.5737	11.5488	11.0068	11.0846	11.2845	11.325	11.4588	11.0775
LE01Gene00807	12.6728	12.5884	12.6389	12.0097	12.514	11.9488	11.9951	12.5277	11.9385	12.8556	12.9925	12.7723	12.3687	13.1106	12.2776	12.2052	12.8731	12.012
LE01Gene00808	15.8056	15.4017	15.2167	14.7139	14.6051	14.6767	14.3506	14.5125	14.6745	15.6574	16.0581	16.0674	15.5054	15.0436	15.459	15.3692	14.7609	14.9433
LE01Gene00809	8.0283	8.58221	8.6289	8.54723	8.566	8.08997	9.03644	8.45323	8.49096	8.64025	8.88036	8.43881	8.37205	8.93669	8.42163	9.03773	8.52109	7.96225
LE01Gene00810	8.3913	8.12329	8.38373	10.878	10.7538	10.7227	10.5134	10.9584	10.1764	7.40035	7.56155	7.62723	9.9636	10.148	10.4719	9.54711	10.0208	10.7049
LE01Gene00811	11.3109	11.0835	10.8574	10.3604	10.76	10.5529	10.6827	10.8991	10.6552	11.2644	11.6163	11.6374	10.9608	11.3393	11.4497	11.2226	11.3609	11.261
LE01Gene00812	7.64946	7.83328	7.86988	8.987	8.8402	9.1779	9.95797	9.48925	9.96051	7.67161	7.7216	7.96673	8.37205	9.18924	9.1181	9.10868	9.35603	8.99631
LE01Gene00821	10.1311	10.1169	10.1034	10.2811	10.3372	10.206	10.1688	10.511	10.2935	10.1196	10.3475	10.3602	10.5942	10.402	10.6447	10.4792	10.1574	10.2013
LE01Gene00822	10.7214	10.5409	10.5857	10.0305	9.87206	10.0279	10.1082	10.0138	10.1001	11.1697	11.0675	11.08	10.6658	10.4586	10.501	10.6325	10.6003	10.4419
LE01Gene00823	8.19706	8.37717	8.80651	9.79733	9.48363	9.63038	9.49997	9.27586	9.42901	8.5347	8.89212	8.46376	9.37395	9.13819	9.32277	8.93214	9.51277	9.91252
LE01Gene00824	8.89527	9.22832	9.17227	9.06144	8.77715	9.02801	9.64911	8.95149	9.47534	9.96703	9.64707	9.01537	9.45312	10.1369	9.54252	9.87802	10.3969	9.98361
LE01Gene00825	11.3186	11.3545	11.2853	11.2093	10.9228	11.0745	11.3073	10.8833	11.2125	11.2403	11.0413	10.8891	11.1628	10.8471	10.9566	11.3691	11.1091	11.1219
LE01Gene00826	12.3606	12.2697	12.6541	12.2521	12.3998	12.1662	12.3536	12.444	12.4304	12.3363	12.2509	12.2138	12.3339	12.2707	12.3419	12.4811	12.189	12.1925
LE01Gene00827	8.16576	8.45013	8.36792	8.91469	8.86928	9.14914	9.29512	8.90215	9.45929	8.08659	8.20883	7.71296	8.96505	9.37079	8.40414	8.8216	9.441	9.20743
LE01Gene00828	12.8371	12.56	12.7135	12.17	12.286	12.2653	12.0825	12.2027	12.0954	12.9703	13.176	13.3707	12.8859	12.5662	12.9324	13.1047	12.6241	12.3665
LE01Gene00829	10.9919	11.5658	11.4738	10.8272	10.6044	10.673	10.7765	10.7468	10.7572	11.3949	11.1645	11.2986	10.6708	11.0402	10.7704	10.7011	11.3609	10.9921
LE01Gene00830	11.3073	11.6256	11.5017	11.573	11.3547	11.4041	11.0151	11.4088	11.0398	11.2187	10.9738	10.8207	11.0127	10.9108	10.8099	11.1239	11.2722	11.5004
LE01Gene00831	10.8359	10.9091	10.68	11.37	11.2054	11.3136	11.2976	11.1032	11.2132	10.6808	10.3314	10.7147	11.5517	11.3442	11.3344	11.145	11.1486	11.5873
LE01Gene00832	11.0574	10.1623	11.0001	10.772	10.3035	10.6772	10.8207	10.6427	10.6072	11.1806	11.1008	11.414	11.3093	11.3431	10.5693	11.301	11.355	10.6754
LE01Gene00833	9.44982	9.88955	9.5591	10.1122	10.0285	10.47	10.135	10.2254	9.84705	10.0327	9.64533	9.30948	9.99172	9.30618	9.234	9.15232	8.92986	10.2575
LE01Gene00834	9.02554	8.77754	8.76487	10.1283	9.61306	9.8473	10.0729	9.65663	10.0566	8.66806	8.04479	8.54002	9.66417	9.07755	9.62031	9.36201	8.9644	9.62367
LE01Gene00835	13.4234	13.2732	12.975	11.4722	11.6657	11.5228	10.98	11.5111	11.2903	13.4693	13.4102	13.101	11.6176	11.3575	11.2537	11.7248	11.177	11.0541
LE01Gene00836	9.10077	9.56764	9.45634	10.1972	10.0528	10.2984	9.95445	9.48297	9.94248	9.27011	8.6506	8.82633	9.26187	9.21058	9.0153	9.40775	9.2429	9.73719
LE01Gene00837	11.1373	11.1138	10.9664	10.5503	10.6453	10.4016	10.499	10.7787	10.4925	10.9775	11.1383	11.4984	10.7692	10.825	11.192	11.1497	10.5711	10.6789
LE01Gene00838	11.8079	11.9312	11.7597	11.249	10.9892	11.1259	10.9413	11.1815	10.8965	11.6821	11.405	11.5273	10.8851	10.7837	10.8524	10.7525	10.6959	10.798
LE01Gene00839	12.7504	12.3571	12.6443	13.6133	12.8045	12.7094	13.1622	12.7915	12.477	11.7793	12.8304	12.9363	13.5124	12.3315	12.8393	13.503	12.8126	13.9596
LE01Gene00840	12.7995	12.5182	12.7104	12.6739	12.4384	12.5115	12.3892	12.0055	12.4506	12.7968	12.8219	12.9452	12.2532	11.6482	12.035	12.3122	11.3062	11.9233
LE01Gene00841	12.0059	12.2786	11.7248	11.2557	11.348	11.272	11.3461	11.1738	11.6176	12.8881	13.1582	12.9963	12.0549	12.7962	12.4471	12.0448	12.6757	12.3534
LE01Gene00842	5.52341	5.72071	5.15276	6.15536	5.83284	6.23454	6.96284	6.0783	6.18943	5.31577	5.47131	5.68476	6.17224	7.31738	6.70448	6.55852	8.14207	6.40017
LE01Gene00843	11.5177	11.1507	11.1004	10.7771	10.8561	10.7493	10.2814	10.7336	10.3752	11.6602	11.9529	11.63	11.3425	10.5946	10.8953	11.354	10.4555	10.7313
LE01Gene00844	9.16324	9.42009	9.78866	9.5592	9.08546	9.61293	10.3161	10.0095	9.77665	8.18612	8.64713	8.77742	9.51162	9.97039	9.91395	10.1856	10.6023	9.71348
LE01Gene00845	7.74333	7.83328	8.41098	7.48187	7.99882	7.60263	8.8706	8.11727	8.52218	7.23356	7.06589	7.31628	8.29678	8.74853	8.64652	9.19989	9.43429	7.97939
LE01Gene00846	5.95869	6.12889	5.6991	6.11291	5.85627	6.17872	7.26549	6.10034	6.39621	5.65843	5.15749	5.59728	6.19084	6.55118	6.42121	6.25249	7.21133	5.94501
LE01Gene00847	10.3318	10.4755	10.6606	10.9194	10.8186	11.0027	11.9049	11.1242	11.7412	10.4739	10.6668	10.7641	11.3205	12.3006	12.3367	12.1625	13.4123	12.0551
LE01Gene00848	10.4244	10.6343	11.0343	10.4182	9.58177	9.77071	10.5419	9.64917	9.80414	9.37928	10.0564	10.2758	9.71645	11.0061	10.2982	9.61692	12.3353	9.2807
LE01Gene00849	6.75607	6.78424	7.69088	9.84025	9.87922	9.61469	9.94738	9.63791	9.90574	6.4006	7.30445	8.29331	9.78385	11.1412	10.8725	10.4157	12.5954	10.4975
LE01Gene00850	8.23203	8.24218	8.19506	8.38276	8.13437	7.99081	8.51158	8.79475	8.71985	8.59026	8.72147	9.00973	8.3096	8.76144	8.84752	8.67968	9.62695	8.75224
LE01Gene00851	6.5359	7.29614	7.46435	6.81527	7.21394	6.67199	6.29727	6.20575	6.02475	6.1672	7.07623	7.63457	7.612	9.64081	9.16818	8.66091	10.8441	8.13025
LE01Gene00852	11.0297	10.9949	10.5917	9.5982	9.9959	9.64761	9.16701	10.0777	9.12631	11.2638	10.9752	11.1585	9.88297	9.35597	9.97	9.66667	8.9829	9.18544
LE01Gene00853	9.70755	9.60539	9.48043	8.38722	8.88361	8.43784	8.65742	8.93931	8.4074	9.77259	9.69146	9.69907	8.53741	8.68558	8.57016	8.67968	7.63437	8.24336
LE01Gene00854	8.08678	7.70004	7.90864	7.36915	8.05559	7.80052	8.26649	7.80472	7.73854	8.10705	7.67474	8.20729	7.22671	6.84599	7.34105	7.243	6.92282	7.03513
LE01Gene00855	11.2284	11.2155	10.9723	11.3031	11.2122	11.4588	11.734	11.8689	11.4959	11.3761	11.3485	11.7729	11.6769	11.7086	12.1064	11.3737	11.7122	11.6113
LE01Gene00856	10.9983	10.6045	10.7457	10.2847	10.4892	10.2176	10.2856	10.4394	10.3604	11.0677	10.9431	10.8604	10.6321	10.5082	10.7454	10.5109	10.3667	10.2876
LE01Gene00857	10.6871	10.4441	10.4289	9.17413	8.8893	8.71791	7.89957	8.54045	8.07575	10.5884	10.6066	10.2147	8.8902	7.79646	8.13931	7.99625	8.35113	6.94494
LE01Gene00858	12.7606	12.5884	11.3566	12.3885	11.6284	11.9602	11.7024	10.7736	11.7675	13.9744	13.6757	13.6227	11.404	11.5201	11.3854	11.7662	11.6576	11.9492
LE01Gene00859	10.5587	10.4007	10.7556	11.1169	11.2711	11.1216	10.9765	12.1692	11.189	10.437	10.5493	10.2887	11.265	11.596	11.4598	11.1638	11.2009	11.4346
LE01Gene00860	13.8197	13.763	13.9661	12.0294	11.105	11.7186	10.927	10.2191	10.6103	13.7468	14.005	13.9057	12.3024	11.8021	10.087	11.4494	11.2231	11.6091
LE01Gene00861	6.71958	7.27844	6.77178	6.78854	6.53081	6.45419	6.56095	6.99885	7.05081	6.22451	6.28708	6.16215	6.33158	6.25517	6.11213	6.29205	6.47736	6.62012
LE01Gene00862	11.1799	11.2758	11.5044	11.2739	11.0135	11.2462	11.1953	11.1255	11.1323	11.3355	11.326	11.3663	11.4683	11.6258	11.2815	11.392	11.72	11.3261
LE01Gene00863	11.3754	11.7735	11.5861	10.8007	11.3204	10.8056	11.0641	11.1235	11.1553	11.7183	11.6591	11.6528	11.0134	11.2146	11.0739	10.7347	11.3287	11.1799
LE01Gene00864	6.98853	7.17702	6.83063	7.63973	7.3686	7.22493	7.7612	6.74275	7.4539	6.52747	6.35659	7.26989	6.77538	7.04915	6.67562	7.15991	7.14717	7.71181
LE01Gene00865	13.0338	13.3645	12.8812	11.4579	11.6237	11.3424	11.2588	11.4555	11.3807	13.3232	13.1788	13.0369	11.3205	11.4822	11.704	11.5416	11.6157	11.1625
LE01Gene00866	10.3002	10.4647	10.0123	9.63804	9.82829	9.75489	9.57761	9.89908	9.5069	10.2621	10.1065	10.277	9.5391	9.49771	9.75575	9.96319	9.33458	9.7186
LE01Gene00867	12.0546	12.3337	11.7725	11.1851	11.466	11.3949	11.0526	11.3479	11.412	11.9978	11.8891	11.5604	11.0697	11.5348	11.1249	11.1771	11.5402	11.1385
LE01Gene00868	12.7132	12.5052	12.9259	13.2907	13.0125	13.2322	12.9316	12.8239	12.8762	12.4377	12.2236	12.3643	12.953	12.3578	12.5788	12.4478	11.9482	13.0294
LE01Gene00869	11.2851	11.3455	11.6352	11.8057	11.8215	11.9619	11.718	11.9982	11.581	11.4615	11.3576	12.0394	11.6503	11.489	12.1647	11.4352	10.9808	11.8416
LE01Gene00870	10.7167	10.5213	10.9585	11.6855	11.5096	11.6164	11.4182	11.6802	11.3636	10.8671	11.0688	11.1781	11.8822	12.2295	11.9995	11.5005	11.9016	11.8752
LE01Gene00871	3.94471	3.52841	4.7266	6.43928	6.61564	7.4221	6.05555	7.66383	6.39621	4.41856	6.91278	5.01219	7.93245	9.63029	7.74694	7.01377	9.51489	9.07549
LE01Gene00872	10.2263	10.6107	8.71263	7.38708	6.51617	7.17825	6.73535	7.04503	7.26639	11.18	11.8677	11.2646	8.3349	8.59834	8.2945	7.5751	8.76506	8.09922
LE01Gene00873	8.04315	7.78396	7.33211	7.43955	7.95608	7.73753	7.20746	7.80472	7.57798	6.82789	7.20431	7.14177	7.3226	6.95114	7.54632	7.62242	6.84406	6.48262
LE01Gene00874	9.76985	9.58394	9.50774	8.01311	8.40849	8.01758	7.00433	8.53236	7.79077	9.17881	9.20168	8.76409	7.49714	7.11097	7.23623	7.68319	6.94815	7.1506
LE01Gene00875	9.04779	9.00171	9.09756	9.49453	9.50417	9.49028	9.71931	9.61895	9.80414	8.84294	9.12408	9.24857	9.61509	10.2023	9.67055	9.47159	9.95985	9.46032
LE01Gene00876	12.2815	12.3078	12.5702	12.4669	12.3101	12.4537	12.3801	12.3139	12.2576	12.2379	12.1909	12.3089	12.4847	12.3277	12.1172	12.2072	12.178	12.5125
LE01Gene00877	7.69403	7.33945	7.31573	9.19972	8.78327	9.02274	8.56339	8.83145	8.21877	6.81551	7.43872	7.0893	8.76547	8.65131	9.05786	8.6982	8.40242	8.67368
LE01Gene00878	4.4981	4.84719	5.39037	6.84151	6.85544	7.20644	6.38365	6.39595	0	4.71365	4.59259	5.22169	7.01341	7.01722	6.48914	6.96565	6.68745	0
LE01Gene00879	7.64298	6.92738	7.84726	8.64358	8.28873	8.51124	8.22029	8.01076	8.36866	6.9117	7.4226	7.35235	8.14767	7.70587	8.05217	7.95987	7.72507	8.51817
LE01Gene00880	6.22481	5.72071	5.42133	7.5471	6.92357	7.23409	7.09674	6.86364	7.32828	5.98019	5.03563	6.01238	6.72522	6.30892	7.13385	6.75532	7.03345	7.1506
LE01Gene00881	10.4216	10.6856	10.5468	10.2299	10.4845	10.3147	10.3487	10.5436	10.1917	10.2287	10.1128	10.1925	9.93217	9.74522	10.0325	10.3828	10.2353	10.5859
LE01Gene00882	9.63919	9.75525	10.0672	8.72336	8.945	8.76606	8.79381	8.95754	8.56993	9.6172	9.67284	9.47609	8.60484	8.83655	8.995	9.44112	9.06043	8.65957
LE01Gene00883	11.9626	12.4089	12.3298	11.8867	12.0675	11.9043	12.0711	12.2687	12.0352	12.2598	11.9249	12.1834	11.652	11.7317	11.9374	11.823	11.8967	11.6824
LE01Gene00884	9.30955	9.54191	9.30062	7.57082	8.58365	8.06966	7.86244	8.69689	7.63623	9.60646	9.3042	9.61989	8.08938	8.56927	8.54644	7.88423	8.23245	7.71181
LE01Gene00885	10.4413	10.6071	11.1941	11.2661	11.3903	11.1955	11.4405	11.5116	11.189	10.7054	10.7556	10.4771	11.2782	11.3474	11.0467	11.4728	11.2989	11.2297
LE01Gene00886	12.1653	12.1974	12.2643	12.5523	12.5653	12.5847	12.8896	12.5991	12.8673	12.4397	12.3189	12.4674	12.4624	12.7848	12.5924	12.571	12.9125	12.8451
LE01Gene00887	6.03986	6.44669	5.29329	7.94819	8.06064	7.65129	7.09674	8.59191	7.76116	5.7393	6.33953	6.42182	7.27109	7.30861	8.05777	7.44953	7.21133	7.85489
LE01Gene00888	11.1316	10.4579	11.0561	11.2624	11.4584	11.3837	11.5629	11.6408	11.5629	11.2903	11.5886	11.4807	11.8768	11.8562	11.5376	12.1202	11.6748	11.448
LE01Gene00889	12.407	12.5787	12.4643	12.2463	12.3779	12.3611	12.2311	12.3416	12.4517	12.3742	12.3755	12.5174	12.3551	12.0084	12.432	12.0942	12.113	12.314
LE01Gene00890	9.70132	9.45399	9.59519	10.6576	10.4231	10.6561	10.4941	10.745	10.724	9.16912	8.9579	9.02658	10.0928	9.98697	9.91704	10.723	10.319	10.2062
LE01Gene00891	11.757	11.7668	11.5507	11.1599	11.5676	11.2664	11.4623	11.6469	11.6098	11.8797	11.6172	11.7169	11.145	11.0222	11.4964	11.2925	11.2437	11.0985
LE01Gene00892	7.38009	7.22401	8.27775	9.8206	9.33935	10.1418	10.6185	9.68242	10.2542	7.53481	6.39013	7.22195	9.6356	9.55444	9.19639	9.01131	9.35839	9.8393
LE01Gene00893	12.7749	12.5474	12.3043	12.9764	12.5495	12.3559	12.4707	12.3103	12.1295	12.3975	12.2253	12.3046	12.722	12.932	12.4247	12.964	12.8861	12.6883
LE01Gene00894	13.7507	13.6858	13.9989	15.2241	14.9218	15.2722	14.9393	14.6984	14.8477	13.303	13.2091	13.464	14.9815	14.5075	14.6924	14.341	14.486	15.5461
LE01Gene00895	4.17777	5.06929	5.62123	5.21614	5.26047	5.35778	6.25205	4.80961	6.18943	5.08768	5.67551	4.65594	4.76556	4.85931	4.90312	5.83708	5.82956	2.57719
LE01Gene00896	7.36442	7.60385	6.93086	8.04733	7.65577	7.95803	8.23198	8.60738	8.52218	6.96872	7.35627	7.14177	8.31808	8.1506	8.09094	8.13324	8.36059	8.68418
LE01Gene00897	11.1023	11.2505	11.1806	10.8468	11.0816	10.6981	10.9528	11.0991	10.9351	11.4135	11.2521	11.1919	10.9493	10.8741	11.15	11.1961	11.1258	11.0675
LE01Gene00898	11.3715	11.3987	11.4738	11.7379	11.5729	11.6527	11.7427	11.495	11.6688	10.9444	10.8208	10.8596	11.3278	11.2414	11.2641	11.5047	11.4731	11.494
LE01Gene00899	10.3277	10.6221	10.1117	9.47999	9.83125	9.59705	9.78427	9.90378	9.37383	10.462	10.1826	9.95801	9.16171	8.70576	8.98032	8.90688	8.72533	8.89155
LE01Gene00900	8.80236	10.0829	8.41867	7.52298	7.45555	7.27014	8.01908	7.78444	7.64436	11.4334	10.8979	10.6501	9.70032	9.01154	8.7155	7.81123	7.98575	8.15561
LE01Gene00901	12.2297	12.2227	11.92	10.7856	11.0698	10.6277	10.3161	10.8552	10.472	11.9572	11.8836	11.572	10.454	9.94374	10.3275	9.91333	10.0386	9.97224
LE01Gene00902	10.9446	11.2351	11.0243	10.1742	10.1496	10.1707	10.2313	10.3094	10.3077	11.1031	10.8729	11.0556	10.4327	10.0115	10.0282	10.1239	10.1869	10.3316
LE01Gene00903	10.4636	10.2958	10.2279	9.09727	9.62504	9.12964	8.67893	9.43391	9.17484	10.455	10.3634	10.4842	9.35963	9.38337	9.71732	9.63048	9.64061	9.13023
LE01Gene00904	11.3924	11.2259	11.1846	11.1143	11.0394	10.9784	10.9207	11.2564	11.112	10.9558	11.0393	10.9359	10.416	10.6693	10.7523	10.9594	10.8297	10.6657
LE01Gene00905	12.1591	11.838	11.9214	12.0967	11.7716	12.1347	12.3592	11.8865	12.1024	11.6701	11.9242	12.0709	12.1014	11.9876	11.9324	11.8601	12.0427	12.4933
LE01Gene00906	12.3294	12.4455	12.425	11.8317	12.1151	11.8345	11.9925	12.1712	11.8223	12.6537	12.5525	12.3895	11.7633	11.7082	11.9027	12.2097	12.0383	11.9203
LE01Gene00907	9.50804	9.38537	9.50412	8.05296	8.53003	7.99081	7.64359	8.66397	8.08175	10.6541	10.5446	10.3701	9.16407	8.92527	8.98915	8.03173	8.36059	8.31712
LE01Gene00908	10.8862	11.0546	10.4959	9.88824	9.97999	10.054	10.1082	9.83316	9.87151	10.7718	10.7148	10.2061	9.65247	9.96761	9.73667	10.2967	10.3105	9.84086
LE01Gene00909	10.4999	10.5363	10.7388	11.2948	11.0903	11.2529	11.3468	11.1802	11.2871	10.4125	10.2527	10.3232	10.8671	10.7646	10.9648	10.8419	10.7545	11.1417
LE01Gene00910	10.0028	10.3391	10.2312	10.7974	10.767	10.6989	10.6901	10.5284	10.4583	10.1145	9.8505	10.1014	10.4807	10.1295	10.3367	10.3387	10.3105	10.8756
LE01Gene00911	10.9938	11.1622	10.8951	9.80901	10.1847	9.71293	9.67503	10.2771	9.74863	11.1271	11.0314	10.6447	9.82164	9.55815	10.2015	9.88127	10.1286	9.2668
LE01Gene00912	10.5902	10.5548	10.7989	9.83699	10.1353	9.85325	9.90602	10.3559	9.97025	11.3365	11.357	11.3882	10.3911	10.5928	11.0197	10.911	10.8659	10.1817
LE01Gene00913	11.3175	11.4962	11.517	10.8645	11.1939	11.018	10.9537	11.164	10.841	11.3975	11.1573	11.2717	10.846	10.5367	11.3448	11.1074	10.767	10.9456
LE01Gene00914	14.8545	14.9902	14.9088	14.8863	14.3421	14.5955	13.7492	13.4216	13.9633	14.8579	14.7359	14.5152	14.3334	13.3002	13.8013	14.0557	13.7418	13.8517
LE01Gene00915	0	3.64349	3.87261	2.03578	0	0	2.21399	0	0	0	0	6.36998	0	0	0	0	0	5.51443
LE01Gene00916	4.24778	5.36593	5.22474	4.6895	4.65911	5.54603	5.40082	5.78366	6.43423	5.51267	6.40661	5.87035	7.80545	7.71253	5.6605	7.67573	6.52863	5.63471
LE01Gene00919	5.09999	5.10988	5.91026	6.57057	6.94558	7.24318	6.4452	7.16491	7.12243	5.63043	5.70246	5.22169	7.15274	7.35193	6.94116	7.32156	7.06851	7.49851
LE01Gene00920	11.1159	10.6772	10.8834	11.6483	11.2906	11.5957	11.695	11.3375	11.4936	10.7573	10.8758	10.9891	11.7284	11.4763	11.5752	11.7266	11.1417	11.5477
LE01Gene00921	10.0935	10.0559	10.4279	12.158	11.9068	12.2213	12.3692	11.7194	12.221	9.85656	9.22974	9.91795	11.8024	11.4856	11.2316	11.2486	11.5772	12.5046
LE01Gene00922	8.54172	8.21917	9.10473	9.89765	8.96938	9.9186	9.39209	8.26117	9.47077	7.69207	8.0965	7.43036	10.0271	9.60724	8.91699	8.5873	8.91066	9.8779
LE01Gene00923	9.64568	9.43614	9.4432	11.0898	10.6052	10.9571	10.8012	10.6445	10.9928	9.04735	9.19695	9.277	10.4376	10.2246	10.0125	10.6228	10.3454	11.0722
LE01Gene00924	9.88279	10.1526	10.545	11.5444	11.1567	11.2473	11.4827	11.0812	11.4629	9.99885	10.1377	9.99271	11.1426	11.2682	11.0836	11.2429	11.4478	11.6413
LE01Gene00925	11.3357	11.12	11.148	10.2236	10.0816	9.99061	9.7005	9.72383	9.71428	11.5575	11.6088	11.5662	10.4826	9.97732	10.4645	10.429	10.0864	9.76051
LE01Gene00926	10.6358	10.5071	10.728	11.357	11.3475	11.5293	11.67	11.4715	11.428	10.0179	10.1609	9.93441	11.1809	10.7908	10.502	11.0559	10.8424	11.0426
LE01Gene00927	11.6119	11.6661	11.8007	11.1055	11.3681	11.1466	11.2263	11.2515	11.3456	12.151	11.993	11.9675	11.3326	11.0429	11.2173	11.0666	10.5933	10.6524
LE01Gene00928	12.341	12.4366	12.3054	12.2162	11.6394	11.5979	11.9591	11.2416	11.8432	12.29	12.4238	12.4331	11.407	11.2076	11.4943	11.3857	10.9427	11.4064
LE01Gene00929	12.1656	12.2225	11.7275	11.6155	11.3517	11.4117	11.6748	11.2674	11.5815	12.1436	12.4281	12.0217	11.2562	11.2211	10.8804	11.2239	11.1547	11.7194
LE01Gene00930	10.4737	10.5279	10.8951	10.3739	10.556	10.5177	10.7038	10.8455	10.4857	10.8283	10.8162	11.0315	10.6055	10.6547	10.9263	10.4078	10.7732	10.8832
LE01Gene00931	8.55558	8.39781	7.63914	7.09155	7.4632	7.59554	7.04466	7.58787	6.7826	8.66116	8.38966	8.32088	7.54852	6.25517	7.18595	7.17056	7.06851	6.25757
LE01Gene00932	9.95651	9.86159	10.0806	10.5973	9.9585	10.589	10.8139	10.2698	10.694	9.2814	9.09386	8.97256	9.66084	9.90354	8.99208	9.6208	9.60523	9.50045
LE01Gene00933	9.81523	10.0994	10.2689	9.97524	10.0502	9.74371	10.3366	10.5315	10.4374	10.528	10.8116	10.6041	10.6107	10.6556	10.8116	10.5695	10.7328	10.6035
LE01Gene00934	12.8082	12.7796	12.1483	10.2727	10.6528	10.6076	9.33902	9.99924	9.79503	12.4498	12.5374	12.0587	9.86571	9.17484	9.48129	9.60911	9.49355	8.62731
LE01Gene00935	12.8732	12.7747	13.0393	11.4982	11.8564	11.3567	11.5785	12.4378	11.7699	13.4813	13.2239	13.2987	12.0441	12.1832	12.6149	12.1608	11.9796	11.756
LE01Gene00936	11.7221	11.5626	11.6207	11.0475	11.1406	11.1442	11.1878	11.2472	11.0475	11.5146	11.6278	11.2729	11.4322	11.3028	11.1901	11.0284	11.0786	11.2433
LE01Gene00937	12.5018	12.8503	12.3007	10.8032	11.162	10.8087	10.4672	11.2097	10.6309	12.3774	12.1515	11.9776	10.6913	10.6676	10.5395	10.5015	10.6912	10.4481
LE01Gene00938	12.2991	12.0649	11.9696	11.8705	11.7389	11.9411	11.9674	11.9077	12.0943	12.1414	12.0049	12.1073	11.6603	11.75	12.04	12.0207	11.7406	11.9203
LE01Gene00939	7.68143	7.4777	7.89215	6.5548	7.85502	6.86118	7.20746	7.33255	7.01363	6.38392	6.71525	6.20223	5.68733	7.29091	6.15458	5.83708	5.45864	6.12008
LE01Gene00940	13.7834	13.6888	13.2471	12.8387	12.9699	12.7935	12.8761	12.9821	12.8968	13.5877	13.6876	13.7328	13.0911	13.0072	13.3412	13.2256	12.9431	12.961
LE01Gene00941	11.8581	11.5789	11.0738	10.9124	10.6309	10.8942	10.7933	10.6825	10.7298	12.0373	12.129	12.3238	11.6431	11.2111	11.655	11.4728	10.996	10.9192
LE01Gene00942	10.4755	10.2602	10.6328	10.9893	10.8096	11.0566	11.4246	10.852	11.511	10.147	10.0964	10.1534	10.8736	11.1176	10.7402	11.2753	11.4522	11.109
LE01Gene00943	13.392	12.9585	13.1442	11.7792	11.8709	11.7584	12.0058	12.0964	11.9434	14.0814	13.8857	14.1899	12.6545	12.2365	13.2359	12.4332	11.9113	12.0926
LE01Gene00944	11.4422	11.2908	11.562	11.4468	11.829	11.4978	11.4348	11.8653	11.3826	11.7536	12.0046	11.8756	11.8305	11.9731	11.8621	12.0907	11.7205	11.5709
LE01Gene00945	9.18571	10.2523	9.65013	10.3398	10.8749	10.5195	10.1884	11.0539	11.0475	9.47291	9.72634	9.38107	11.7272	12.1128	11.6928	11.0702	11.8816	11.4253
LE01Gene00946	7.59678	7.18654	8.45653	9.70209	8.73984	9.35202	9.51918	8.09549	10.0942	7.44925	8.27316	8.32088	10.7481	10.0749	10.2946	11.9074	10.095	10.7655
LE01Gene00947	12.6117	12.1953	12.5991	13.038	12.7003	12.8946	12.4673	12.4413	12.4736	12.3341	12.0788	11.9606	12.5317	11.6654	11.5722	12.0893	11.2722	11.9779
LE01Gene00948	5.97941	5.66731	3.46053	6.57057	4.54838	5.78907	4.35128	2.63244	3.14939	7.57209	6.63359	7.50436	4.95156	5.73302	3.21153	4.0786	4.68432	4.51463
LE01Gene00949	11.5889	11.6644	11.3858	11.4045	11.3848	11.3924	11.3522	11.1066	11.2463	11.3114	11.0772	11.1661	10.9084	10.9828	10.9055	10.7979	11.2475	11.592
LE01Gene00950	9.85081	8.81792	9.51134	11.3219	10.8193	11.2428	11.0125	10.5244	10.8785	8.97405	9.08365	9.81023	11.4243	10.4743	11.0474	10.6863	10.3287	11.2836
LE01Gene00951	8.52066	8.63879	8.56101	8.59814	8.82246	8.65112	9.13	8.92085	8.82018	7.81532	7.3392	7.88904	8.2309	7.93394	6.94116	7.33109	7.31231	7.72542
LE01Gene00952	9.96563	9.8009	10.6253	12.0702	11.3304	11.9899	12.3197	11.6669	12.4118	9.974	9.65571	9.89826	12.0186	12.4916	12.1605	12.99	12.8769	13.0364
LE01Gene00953	12.2289	12.0943	11.7437	10.3918	10.5605	10.0771	10.2357	11.2254	9.85933	12.0286	11.9879	11.9322	10.0829	10.0723	10.4969	10.4641	10.1668	10.0005
LE01Gene00954	9.94996	10.052	9.70463	9.33284	9.73973	9.43576	9.36314	9.61705	9.62668	10.5847	10.0976	10.4628	9.80211	9.61081	10.1875	9.80299	9.25817	9.62911
LE01Gene00955	10.3784	10.8323	10.6369	9.82225	9.85761	9.75965	9.58674	9.65477	9.34667	10.3257	10.1573	10.0894	9.2172	10.2918	8.5623	9.31238	10.499	9.50243
LE01Gene00956	8.08678	8.37717	8.46398	12.6308	12.684	12.5307	13.4421	12.948	13.4225	7.25205	8.11668	7.75399	10.9784	11.6302	11.2365	12.28	12.4378	12.6857
LE01Gene00957	3.03549	2.75455	3.95955	5.85403	3.49394	5.90827	4.72666	2.36753	6.5074	2.96258	3.12252	2.332	4.90726	4.81046	3.21153	6.29205	5.74539	6.16072
LE01Gene00958	12.5101	12.3124	12.4034	12.732	12.467	12.6862	12.4735	12.5376	12.3929	12.1327	11.8736	11.9816	12.1167	11.5851	11.8367	11.8922	11.5102	12.2717
LE01Gene00959	11.7109	11.518	11.7856	11.1501	11.1389	10.8562	10.5869	10.8233	10.7553	11.844	11.7648	11.6064	10.5345	10.1675	10.1875	10.7094	9.80904	10.2231
LE01Gene00960	12.6969	12.6991	12.3382	10.9155	11.228	11.024	10.5915	11.2856	10.8232	13.0761	12.9039	12.8332	11.0903	10.7589	11.3882	11.2586	11.0119	10.7271
LE01Gene00961	12.8628	13.113	13.0082	12.3172	12.2968	12.1978	12.3902	12.2037	12.4073	13.4157	13.0915	13.0982	12.5269	12.7208	12.7717	12.8235	13.0313	12.5931
LE01Gene00962	10.2971	9.84966	9.91912	9.96035	9.69006	9.41578	9.35247	9.38537	9.07006	9.96282	10.2719	10.306	9.76225	9.26371	10.1181	9.70198	9.18549	8.95935
LE01Gene00963	12.5526	12.5753	12.5053	12.8061	12.5553	12.7422	12.5962	12.3531	12.4595	12.6721	12.5446	12.6654	12.6724	12.1868	12.2902	12.1376	11.8934	12.5723
LE01Gene00964	11.4552	11.1125	11.0696	10.5171	10.6579	10.4436	10.6699	10.5496	10.7115	11.2092	11.4983	11.4352	10.7196	10.8327	10.6298	11.0458	10.4893	10.6118
LE01Gene00968	0	0	0	1.02395	0	0	0	0	0	1.55654	1.96011	0	0	0	0	0	0	0
LE01Gene00971	9.87036	9.83762	9.85253	9.80402	10.1425	9.76124	10.1272	10.2686	10.2805	9.60826	9.74104	9.81185	9.7419	9.77417	9.94905	9.98599	10.0312	10.0144
LE01Gene00972	8.57273	8.55675	8.63552	7.81548	8.30585	7.87266	8.35468	8.59191	7.73092	8.54223	8.64713	8.74387	8.10417	8.66512	8.5142	7.90352	8.57898	8.2899
LE01Gene00973	8.18819	8.32209	7.69088	8.09173	8.11021	8.12485	7.70359	8.36039	7.73854	8.34099	8.57606	7.89517	7.70551	9.49771	9.07454	7.92883	9.32495	8.60907
LE01Gene00974	5.52341	6.29652	6.05548	6.66175	7.3019	7.0801	6.25205	8.88955	7.79808	7.58673	9.33681	9.18998	11.7719	14.6552	13.9346	12.1085	14.8741	13.8229
LE01Gene00975	11.9234	11.1404	11.741	13.4304	13.5496	13.8036	14.5357	14.2954	14.905	10.6637	11.366	10.5966	14.0829	15.1913	13.4155	14.1385	15.479	14.4661
LE01Gene00976	11.9836	11.2317	11.5904	12.8737	12.7603	13.0511	13.406	13.2506	13.7245	11.6006	11.8975	11.3009	13.7601	14.4057	12.7063	13.8183	14.0837	13.4578
LE01Gene00977	10.3508	10.7171	10.6419	11.366	11.1672	11.2228	10.9765	10.5734	10.7731	10.2495	10.2274	9.90131	10.7092	10.6214	10.0924	10.128	10.6686	10.9701
LE01Gene00978	11.2976	11.5062	10.7563	10.2136	9.90332	10.1695	10.2357	10.2576	9.98953	11.3059	11.4024	10.8175	9.67081	9.57287	9.4896	9.19207	9.77583	9.86104
LE01Gene00979	10.5115	10.413	10.0684	10.0781	10.1555	9.78791	10.1734	10.8225	10.2555	10.1221	10.4799	10.5643	10.1282	10.0736	10.6288	10.3736	9.96915	10.2374
LE01Gene00980	7.21514	7.90999	7.37228	7.351	7.02009	7.35653	7.51553	7.04503	7.65245	7.85215	7.27782	7.43877	6.94931	7.88759	7.37736	7.46691	7.3508	7.51428
LE01Gene00981	10.6399	10.6186	10.8389	11.4231	11.0284	11.2541	11.2857	11.0826	11.5121	9.12465	9.32168	9.26049	9.1235	9.65644	9.50814	9.63433	9.95985	10.2691
LE01Gene00982	9.81379	9.63176	9.67924	9.46107	9.62504	9.72435	9.74809	9.82656	9.94906	9.40843	9.36449	9.49638	9.60472	9.32587	9.68872	9.66667	9.38646	9.9977
LE01Gene00983	10.748	10.5326	10.8708	11.4889	11.3998	11.4292	11.6412	11.7257	11.7544	10.4798	10.3645	10.8713	11.8482	11.5987	11.7018	11.7517	11.6226	11.6627
LE01Gene00984	12.4222	12.1763	11.9105	11.7102	12.053	11.8513	11.4679	12.0529	11.7052	12.1088	12.3475	12.4294	12.4174	12.0356	12.3993	12.3119	11.7755	11.9575
LE01Gene00985	7.39559	7.41429	7.4267	10.0781	10.6402	10.8217	11.4936	11.6788	11.4263	6.65801	6.95821	6.5823	9.16171	10.4082	9.37981	10.8293	10.8237	11.369
LE01Gene00986	8.89799	9.02047	9.10234	9.84674	9.36408	10.1944	10.3284	9.72383	10.4409	8.96847	8.60847	9.26049	9.23299	9.75655	9.38873	10.0537	10.1396	9.68764
LE01Gene00987	9.9539	10.376	9.91504	10.7703	10.1341	10.8804	10.8934	10.1188	10.9549	10.2075	10.0208	10.2593	10.5678	11.4836	10.7419	11.5584	11.4969	10.6833
LE01Gene00988	11.8079	12.2672	11.9469	11.1845	11.667	11.3759	11.4623	11.5476	11.4658	12.0212	11.796	11.9823	11.1908	11.2511	11.5659	11.2766	11.5495	11.4885
LE01Gene00989	9.29722	9.60361	9.12838	9.36937	9.33101	9.15156	9.00613	9.18339	9.19159	9.25643	9.27532	9.10531	9.19894	8.71242	9.29931	9.11145	8.98901	8.80767
LE01Gene00990	5.2093	5.63985	6.52333	7.36915	7.1772	7.1971	8.03919	6.49909	7.33834	5.12829	5.118	5.91926	6.87074	7.01722	6.21601	6.6527	6.90999	7.01311
LE01Gene00991	6.89345	7.09851	6.994	8.59428	8.26267	8.62351	8.8095	8.7005	9.43371	8.40436	8.91534	7.75399	8.78702	9.74847	8.43891	9.41	9.50852	9.24335
LE01Gene00992	12.2254	11.8589	11.7041	10.0418	9.76316	9.96884	9.38687	9.69153	9.32912	11.3175	11.5741	11.5278	9.73716	9.02499	9.4282	9.72925	8.61896	8.45422
LE01Gene00993	11.9817	11.6089	11.6763	11.158	11.1876	11.2359	10.7584	11.188	11.2793	11.3771	11.4944	11.4209	11.0444	11.2437	11.0418	11.3143	10.8013	10.8045
LE01Gene00994	11.5016	11.3198	11.9405	13.0073	11.9404	12.7925	11.919	10.6075	13.2808	10.4299	10.704	10.5243	11.8493	11.7379	10.6194	12.0022	11.2803	11.3846
LE01Gene00995	11.3562	11.5644	11.8937	11.6553	11.7573	11.5177	11.5337	11.8817	12.3562	10.443	10.8942	10.3843	10.539	11.2772	11.1081	10.8902	11.524	11.3915
LE01Gene00996	10.3368	10.6965	10.7563	11.1095	11.169	11.2836	11.3475	11.2928	11.2773	10.545	10.5877	11.0391	11.4501	11.8958	12.052	11.2511	12.0017	11.5672
LE01Gene00997	11.2857	10.8474	10.8368	10.7677	11.1643	11.1345	10.9198	11.2668	11.2001	12.0748	12.8555	13.3614	12.6878	12.7838	13.3051	12.4978	12.4864	11.9151
LE01Gene00998	10.5106	10.7923	10.5424	11.044	10.8742	10.9072	11.0184	11.0433	10.5904	10.5318	10.4564	10.4984	10.5731	10.3718	10.6724	9.75955	10.2054	10.8983
LE01Gene00999	12.1886	10.7939	10.9788	16.0204	13.5195	13.8284	15.6658	14.5384	14.5782	7.88215	9.18983	10.2617	9.86427	9.24545	9.37757	8.73455	8.82097	8.2899
LE01Gene01000	7.26663	6.94992	7.52262	8.26168	7.40082	7.67838	7.87741	7.84444	8.38331	6.82789	5.47131	5.84525	6.34825	6.91694	8.01233	7.25306	6.99751	6.93326
LE01Gene01001	11.3846	12.2314	11.8288	11.5242	14.7878	11.7441	11.8116	16.1359	11.5521	11.3371	11.5873	11.5508	15.25	16.1487	18.0965	14.4819	15.911	14.4426
LE01Gene01002	11.4436	11.7849	11.0956	10.1959	10.7869	10.4426	10.1824	10.8745	10.1031	11.5617	11.6647	11.7882	10.4031	10.677	10.7471	10.4145	10.6221	10.2761
LE01Gene01003	12.5276	12.1965	12.3506	12.6544	12.471	12.6085	12.2952	12.4215	12.2156	12.4711	12.6183	12.5498	12.8033	12.3718	12.4193	12.5277	12.1314	12.6189
LE01Gene01004	9.22529	9.42412	9.04386	10.7164	10.2536	11.1719	10.9669	10.2856	11.4316	9.18123	9.08365	9.1699	10.8401	12.0593	10.5425	13.3483	12.8511	12.0432
LE01Gene01005	11.4049	11.3143	10.9472	11.3201	11.3246	11.3893	11.2574	11.7362	11.4738	11.911	12.418	12.6569	12.2387	12.1877	12.6168	12.2806	12.259	11.8968
LE01Gene01006	9.82528	10.1933	10.0524	10.3694	10.0426	10.5437	10.4053	9.98747	10.6155	9.79798	9.78583	9.78075	10.2563	10.4496	10.2887	10.3363	10.4599	10.3851
LE01Gene01007	8.75507	8.43423	8.94611	11.123	10.2853	10.8118	11.0796	9.60938	10.7544	8.68518	9.75237	9.89062	11.3077	11.122	10.3005	11.1585	11.4428	10.6173
LE01Gene01008	9.59622	9.39156	9.90823	10.8378	10.4618	10.9107	10.8475	10.434	10.9848	9.71543	9.68641	10.3243	11.0374	10.808	11.1067	10.7002	10.5547	11.0419
LE01Gene01009	10.0242	9.97718	10.1527	10.3806	10.4864	10.5638	10.8561	10.5315	11.0696	9.83525	10.0577	9.56715	10.73	11.0429	10.5224	11.4374	11.2379	10.4634
LE01Gene01010	11.0141	11.2725	11.1744	10.252	10.7892	10.4749	10.2771	10.6247	10.2014	11.1992	10.9253	10.2593	10.234	11.0999	10.4656	10.4608	10.1641	10.241
LE01Gene01011	11.8334	12.3721	12.1738	12.5192	12.4264	12.4488	12.1472	12.0226	12.1028	12.0053	11.532	11.6744	12.1384	12.0897	11.9581	11.839	12.1349	12.474
LE01Gene01012	6.79166	7.29614	7.56483	8.49446	8.40849	8.63393	8.94351	8.05092	8.56993	6.95749	5.83013	6.59741	7.59813	6.7194	7.25587	8.19714	7.10275	8.64532
LE01Gene01013	10.1867	9.98129	9.97366	9.95436	9.91592	9.89137	9.79809	9.88486	9.85933	9.8835	9.75559	9.61804	9.29018	8.79635	9.33205	9.56941	9.0311	9.1977
LE01Gene01014	12.7217	12.9237	12.5696	10.5038	10.7326	10.3975	10.0664	10.8075	9.99907	12.9568	12.7304	12.4127	10.1234	9.77736	9.89998	10.1375	10.0118	9.13279
LE01Gene01015	12.7986	12.5222	12.894	12.0692	12.2801	12.101	12.2113	12.2577	11.8196	13.3346	13.7829	13.7136	13.3336	14.0129	13.3834	13.1385	13.6995	13.7924
LE01Gene01016	7.29171	7.16744	6.4945	8.1869	8.01452	7.83102	8.31126	8.5283	8.26698	7.15712	8.25507	7.31628	8.25761	10.0827	8.60502	8.3549	10.0327	9.61273
LE01Gene01017	13.1834	13.0117	12.9487	11.8601	12.2022	11.8647	11.5207	12.0843	11.6417	13.7541	14.2865	14.1536	13.2112	13.9553	13.46	12.9078	13.4319	12.7704
LE01Gene01018	14.613	14.6228	14.5468	13.5612	13.9602	13.4986	13.3644	13.8923	13.4681	14.445	14.2719	14.0808	13.0799	13.1579	13.2105	13.2196	13.2312	13.2064
LE01Gene01020	4.37836	4.02937	3.95955	2.84818	1.51934	4.32559	2.82088	3.04981	3.14939	3.86694	5.59151	3.91864	4.66272	3.65504	2.8475	3.53572	4.55841	2.57719
LE01Gene01022	4.71135	4.79836	4.7266	4.4376	3.49394	4.88636	4.06793	4.22361	4.68612	5.44997	6.50173	5.36983	5.33273	4.70749	3.74362	4.7243	5.42296	2.57719
LE01Gene01027	7.46337	7.12846	6.71043	6.29483	5.87932	6.64478	7.0179	6.0783	7.03852	6.49678	7.12685	6.75393	6.31472	5.97389	7.1232	7.20205	6.25187	6.56062
LE01Gene01028	10.2774	10.5223	10.0598	10.1998	10.4387	10.2664	10.0599	10.5028	10.1862	10.7426	10.6226	10.7311	10.1002	10.7541	10.3309	9.9935	10.5308	10.6649
LE01Gene01029	8.01331	7.68669	8.0785	12.4638	10.4985	10.2153	14.0345	11.7671	12.7405	6.93478	6.50173	7.0893	8.9542	8.45868	8.90771	8.7735	8.40699	12.1755
LE01Gene01030	12.438	12.3021	12.3551	12.8651	13.0031	12.7032	13.5175	13.1604	13.1378	11.9712	11.8654	11.9028	11.8346	12.1431	12.0179	12.0502	12.3889	12.5754
LE01Gene01031	12.5647	12.4856	12.3826	11.26	11.5133	11.4748	11.0706	11.5935	11.1883	12.2015	12.3265	11.9708	11.6478	11.5824	11.7428	11.9755	11.4872	11.4122
LE01Gene01032	11.1414	10.727	11.1492	11.1508	11.2156	11.2984	11.5431	11.4242	11.746	11.2345	11.7143	11.4735	11.8667	12.0296	11.8617	12.1494	12.0993	11.5123
LE01Gene01033	11.2757	11.1604	10.714	10.4737	10.3589	10.2886	10.4647	10.3398	10.4629	11.2501	10.8898	11.0069	10.5244	10.3182	10.6924	10.5328	10.2263	10.3305
LE01Gene01034	11.2742	11.3822	11.2614	11.0587	10.953	11.0292	11.1226	10.7744	11.2234	11.3792	11.1784	11.0658	10.8865	10.6685	10.8362	10.8821	10.6523	10.5083
LE01Gene01035	11.9813	11.809	11.2816	10.2311	10.4387	10.2742	9.84262	10.3525	10.1666	11.7585	11.9113	12.0729	11.0977	10.6152	11.1454	10.9693	10.1935	10.6684
LE01Gene01036	12.0958	12.2062	12.2921	12.117	12.4045	12.1748	12.2539	12.5088	12.221	12.2371	12.1376	12.2369	12.0501	12.1501	12.1108	12.1064	12.2289	12.1643
LE01Gene01037	10.769	10.8047	10.59	10.6362	10.5738	10.5483	10.7288	10.4608	10.8276	11.2455	11.405	11.5401	11.2949	11.4846	11.6928	12.0656	11.6053	11.1867
LE01Gene01038	10.3094	10.1182	9.91912	11.1122	11.1864	11.319	10.6912	11.0189	11.2994	12.0029	13.2255	13.4884	13.4607	14.5134	14.8425	14.4908	14.2142	13.4014
LE01Gene01039	12.3831	12.3566	12.329	11.6571	11.8462	11.642	11.4973	11.6975	11.3691	11.8592	11.7471	11.3424	10.8043	10.8948	10.7831	11.1233	11.3105	11.127
LE01Gene01040	11.5431	11.9155	11.5099	11.0002	11.2048	11.0891	10.6449	11.024	10.6431	11.6349	11.3791	11.4076	10.9007	10.7452	10.9109	10.7239	10.8263	10.868
LE01Gene01041	12.1861	11.9201	11.9248	11.4039	11.4043	11.3308	11.5808	11.5651	11.4727	12.5026	12.6247	12.7065	11.8167	11.9126	11.7708	12.4546	12.0036	11.3154
LE01Gene01042	11.961	11.3629	11.3765	12.7053	11.484	11.5638	12.432	10.8689	11.8829	9.08394	10.3031	9.65462	10.2836	10.8319	10.0096	11.2473	11.4829	11.3614
LE01Gene01043	9.69976	9.43414	9.45634	10.8677	10.4211	10.8768	10.8275	10.1079	10.9268	8.89682	8.7411	8.54782	9.519	9.53953	9.57609	9.57142	9.75625	10.0834
LE01Gene01044	12.4422	12.0643	12.6039	13.2396	12.9172	13.1793	13.1868	12.8659	13.0628	12.2808	12.348	12.4467	13.1165	13.0334	12.908	13.2391	13.0149	12.9097
LE01Gene01045	13.4495	13.1766	13.0916	11.8561	11.952	11.8356	11.3135	12.1131	11.4438	13.4381	13.3205	13.1931	11.889	11.7809	11.9415	12.1938	11.7347	11.5864
LE01Gene01046	11.1362	11.6404	11.2147	11.0212	11.1572	11.02	10.9207	11.2454	10.7609	10.9373	10.647	10.6041	10.7116	11.0762	11.2166	10.9617	11.4277	11.3728
LE01Gene01047	12.1913	12.0914	12.4202	12.2892	12.1277	12.3219	12.6393	12.2273	12.4945	12.1454	11.9575	12.1502	12.3024	12.3749	12.2116	12.4806	12.7528	12.3843
LE01Gene01048	12.3312	12.1769	12.0192	11.646	11.9158	11.601	11.8145	11.8769	11.8794	12.4014	12.8154	12.7206	12.1069	12.3749	12.4508	12.331	12.1469	11.9295
LE01Gene01049	9.73371	9.4967	10.0388	9.90233	9.8342	9.96059	10.1035	10.1228	10.0596	9.80112	10.4593	9.62174	10.1815	10.2716	9.93846	10.6315	10.3691	9.68764
LE01Gene01050	15.7068	15.5959	15.5754	15.8091	15.6679	15.788	15.6581	15.6264	15.6284	15.6902	15.5571	15.6719	15.9151	15.4926	15.8272	15.4771	15.307	16.007
LE01Gene01052	14.3525	15.1028	14.4903	14.6401	14.4319	14.4594	14.3735	14.1527	14.3784	14.4466	13.6953	13.9898	14.034	13.6651	14.1986	13.9391	14.2075	14.6887
LE01Gene01053	10.7956	10.9557	10.9013	9.8435	10.1317	9.63902	9.58446	10.0581	9.45236	11.0179	11.0505	10.6779	10.0425	10.1712	10.041	9.83179	10.3454	9.71178
LE01Gene01054	10.0204	9.54561	10.3526	12.4593	12.0791	12.685	12.9558	12.4091	12.8492	9.18123	9.72634	9.89368	12.3484	13.0153	12.661	13.3633	13.4205	13.1865
LE01Gene01055	10.3257	10.3476	10.2583	9.15072	9.25371	9.27426	8.78193	9.23162	8.8765	10.5599	10.6357	10.3289	8.74987	8.57659	9.15778	9.13611	9.01321	8.83304
LE01Gene01056	10.0562	9.97855	10.0287	10.0545	9.89769	9.88121	10.2269	9.87051	10.3267	10.3949	10.1957	10.3909	10.2662	10.3367	10.5829	10.266	10.2237	10.1493
LE01Gene01057	10.92	10.9881	11.1028	11.1263	11.1359	10.83	10.9135	10.9386	10.8507	11.2134	10.6479	10.8288	10.9049	10.8288	11.1591	10.9393	10.8288	10.5462
LE01Gene01058	12.4068	12.6494	12.4043	11.9922	12.0031	12.1472	11.8828	11.9356	12.145	12.4329	12.1763	12.1731	11.6313	11.7982	11.6166	11.6724	12.0427	11.678
LE01Gene01059	6.88249	7.16744	8.06876	6.38679	7.96149	6.9077	6.65078	7.36932	7.51727	7.22422	6.80501	7.07858	6.93834	7.55834	6.11213	6.2323	7.58679	5.74573
LE01Gene01060	10.8647	10.5138	10.3078	10.2236	10.0336	9.98926	9.87653	10.2662	9.75803	10.7565	10.9424	11.1165	10.539	10.235	10.8581	10.8846	10.1147	10.722
LE01Gene01061	11.5034	11.1628	11.2811	10.7864	10.4172	10.4544	10.1884	9.94547	10.3654	11.3409	11.3916	11.4934	10.763	9.96622	10.0297	9.9447	9.46313	9.95934
LE01Gene01062	13.7748	13.4805	13.3964	12.6395	12.8673	12.6766	12.6046	12.976	12.5618	13.5068	13.7476	13.5563	13.0479	12.7838	13.0354	13.0923	12.647	12.3024
LE01Gene01063	10.3881	10.3864	10.3365	10.6049	10.5702	10.2314	10.8447	10.4307	10.4732	10.3876	10.4945	10.7766	10.3606	10.258	10.7103	10.5964	10.1776	10.283
LE01Gene01064	10.0053	10.1428	10.1767	13.9445	12.7827	13.6146	15.378	13.2922	14.7464	10.466	10.1754	10.5662	12.9535	13.4355	12.7225	12.588	13.0493	12.8373
LE01Gene01065	7.92525	8.49296	8.63221	8.29529	8.51906	8.23386	8.83655	8.6416	8.55275	9.27011	8.63669	9.14184	8.58036	8.38969	8.39973	7.83151	8.47827	7.82991
LE01Gene01066	6.34148	7.52349	7.11257	6.2367	6.87851	5.63167	5.88833	6.24585	6.2115	6.88825	5.47131	5.74026	6.1343	6.60946	5.17469	5.94027	5.7162	6.59067
LE01Gene01067	14.4418	14.4216	14.4601	14.4766	13.9413	14.3009	13.5681	13.3019	13.7391	14.497	14.3787	14.1935	14.0054	13.1708	13.3775	13.7779	13.2775	13.5556
LE01Gene01068	12.9059	12.9444	13.0414	11.1998	11.347	11.1381	11.1249	11.2771	11.2994	13.1822	12.9966	13.0558	11.5046	11.5058	11.6697	11.6426	11.6624	11.1693
LE01Gene01069	7.8983	7.93845	8.18608	9.00162	8.79241	9.04892	9.16701	9.37411	8.82018	8.04478	8.23214	7.88904	9.29878	8.73877	8.80484	8.45849	8.13657	8.55674
LE01Gene01070	11.2038	11.0323	11.5085	11.7898	11.597	11.7588	11.764	11.6046	11.6558	11.3009	11.1927	11.6474	11.9564	11.7011	11.9969	11.4614	11.4084	11.9629
LE01Gene01071	10.6832	10.6054	10.8588	10.6315	10.9952	10.9543	10.7185	10.9919	10.7402	10.3908	10.7882	10.886	11.342	12.0071	11.5381	10.8535	11.7265	11.5766
LE01Gene01072	10.4216	10.3656	10.6394	10.9922	11.0194	11.1503	11.2205	11.0276	11.0913	10.2181	10.0248	10.4251	10.8779	10.7654	11.0502	11.0055	10.8186	11.3979
LE01Gene01073	11.2224	11.6212	11.414	12.3862	11.9896	12.1141	12.2945	11.5867	12.1374	11.3251	11.1364	11.1412	11.4641	11.7649	11.9282	11.9902	12.2475	11.9924
LE01Gene01074	17.1591	16.9777	16.2019	16.1106	14.941	15.3852	14.3369	13.5434	13.8853	17.0267	17.1613	16.9315	14.1675	13.6143	13.6863	14.382	13.8625	14.5364
LE01Gene01075	0	2.2727	2.88146	0	3.23261	0	0	0	0	0	0	0	2.50555	2.76525	0	0	2.07833	3.99125
LE01Gene01076	14.3153	14.7881	14.2824	13.095	13.0592	12.9175	12.79	12.6909	13.0529	14.3686	14.0585	14.0576	12.9842	12.7957	13.1252	12.9751	13.2777	13.0599
LE01Gene01077	11.544	11.8924	11.2069	7.63973	8.90061	8.7048	7.58098	8.2806	8.00803	11.7613	11.6724	11.5059	9.82313	10.2188	8.5142	7.34995	8.54618	8.36138
LE01Gene01078	9.52752	9.63524	9.90686	11.3846	10.938	11.3929	11.1803	10.9069	11.1309	8.66462	8.46635	8.62726	10.5023	9.98285	10.3053	9.92124	9.66564	10.569
LE01Gene01079	9.72146	9.30243	9.70149	10.0017	9.9612	10.1247	10.1224	10.1809	10.1651	9.72042	9.4702	10.2957	10.3626	10.0865	10.6797	9.96472	9.80385	10.2645
LE01Gene01080	8.36791	8.33927	8.82109	10.3929	10.1905	10.1048	10.6427	10.3188	10.3	8.37513	7.5393	8.50039	9.92663	9.8592	9.65769	9.40775	9.31281	10.0446
LE01Gene01081	11.0046	10.8844	10.8482	10.0219	10.1917	10.2842	10.1504	10.2503	10.1708	11.1389	11.0274	11.0787	10.3667	9.97178	10.3742	10.0962	9.82622	10.2243
LE01Gene01082	10.7868	11.0097	10.993	10.5612	11.1341	10.8577	11.0828	11.0269	11.0149	11.2495	11.2555	11.4919	11.4511	11.7765	11.7323	10.8201	11.6653	11.3808
LE01Gene01083	12.4492	12.4517	12.5642	12.0967	12.3868	12.0878	12.2084	12.6387	12.2008	12.555	12.4081	12.5767	12.0816	12.0849	12.1378	12.0411	11.938	12.0755
LE01Gene01084	8.03327	7.8751	8.37585	9.65848	9.06046	9.33935	10.1019	9.24898	10.1764	9.13216	9.23205	9.41983	10.5687	12.3428	11.9559	12.7128	13.1537	13.119
LE01Gene01085	11.8387	11.6352	11.6274	10.9255	10.7922	10.8292	10.4819	10.4882	10.6103	11.7617	11.8505	11.5464	11.2585	10.8962	11.15	11.3604	10.9815	10.4127
LE01Gene01086	10.2857	10.1838	10.2901	9.77027	9.58177	9.90434	9.37637	9.61513	9.52022	9.68172	9.52972	9.27935	8.79919	8.79321	9.32277	9.41	8.838	9.3216
LE01Gene01087	12.2519	12.298	12.5419	14.1383	13.6676	14.1571	14.0932	13.075	13.7257	11.6671	11.3791	11.5273	13.5983	13.1105	12.5786	11.9054	12.8076	14.1069
LE01Gene01088	10.2252	10.0097	10.1177	10.6483	10.5551	10.5083	11.0444	10.4976	10.7997	10.0683	10.2764	10.5957	10.7653	10.488	10.6466	10.7979	10.6162	10.1805
LE01Gene01089	11.2055	11.1006	10.9479	10.6759	10.8186	10.7104	10.6848	11.1018	10.6258	11.0598	11.1401	11.3585	10.9294	10.7354	11.3047	10.9054	10.3819	10.4674
LE01Gene01090	11.8994	11.3739	11.827	11.4946	11.5055	11.7009	11.5111	11.3029	11.5143	11.8448	11.9734	12.0481	12.3075	12.3963	12.0815	12.1015	12.0346	11.6127
LE01Gene01091	10.5852	10.6054	10.4785	10.623	10.5782	10.5629	10.6005	10.4746	10.5477	10.6842	10.4514	10.6832	10.5354	10.3356	10.3954	10.5441	10.1006	10.1916
LE01Gene01092	3.76539	5.36593	3.19985	0	2.72242	3.10774	2.54912	0	0	4.54393	4.11951	4.59702	0	0	0	2.87939	2.67174	2.57719
LE01Gene01093	10.0611	10.3729	10.1619	10.2099	10.0194	10.0631	10.2137	10.3094	10.3481	10.8198	10.7771	10.5662	10.1282	10.294	10.3675	10.1416	10.0764	10.1442
LE01Gene01094	7.14348	8.30908	7.86988	7.8928	7.3848	7.65811	7.93576	7.97542	7.68435	8.04478	7.90678	7.73362	6.99236	7.69245	7.8667	6.79717	7.61868	7.77861
LE01Gene01095	11.805	11.9508	11.6144	11.158	11.4971	11.2187	11.2466	11.6238	11.1331	12.5227	12.3504	12.6241	11.7703	11.8819	12.3321	11.9248	11.5171	11.4532
LE01Gene01096	6.93648	6.69367	7.0545	11.7248	8.6149	7.10027	13.2002	11.8092	11.7657	7.14728	6.45496	6.98976	7.63255	7.81515	8.19122	8.37346	7.45164	12.9499
LE01Gene01097	11.3114	11.0956	10.9251	11.8186	11.7286	11.6591	12.4106	11.6417	12.132	10.882	11.0174	11.4607	11.9386	11.7387	11.3017	11.4473	11.816	12.0982
LE01Gene01098	6.83779	7.15779	6.80738	7.66199	6.87851	6.97479	7.67818	6.97519	7.43527	5.84053	6.17611	5.94311	6.41305	5.88231	6.58539	7.01377	6.90999	6.01318
LE01Gene01099	9.80656	10.3316	10.1318	9.36485	9.75071	9.38938	9.08559	9.59393	9.07006	10.2802	9.98964	9.62543	9.17111	9.17725	9.16299	8.59917	9.32736	9.40219
LE01Gene01100	10.2392	10.2455	10.4374	9.79061	9.85616	9.81715	9.98586	10.024	9.94413	10.7394	10.7692	11.0076	10.2607	10.7947	10.9663	10.5993	10.7803	10.1161
LE01Gene01101	5.70859	6.38187	6.07508	7.48187	8.62175	8.0334	8.75787	8.00493	8.32884	6.38392	6.13713	7.26989	8.01305	7.96217	7.0798	7.85151	8.22211	7.47453
LE01Gene01102	11.0513	11.7134	11.2208	10.5886	10.8684	10.6989	10.7805	10.7957	10.6061	11.2604	10.9431	10.7972	10.383	10.2094	10.6118	10.3976	10.8592	10.9317
LE01Gene01103	8.54867	8.94955	8.52583	10.1349	9.65375	10.0948	9.7068	9.63225	9.61224	7.88807	7.1661	7.9609	8.96775	8.58387	8.80817	8.5873	9.11736	9.63993
LE01Gene01104	12.334	12.031	12.5859	13.6778	13.1111	13.5036	13.3324	12.6212	13.2863	11.8214	12.0052	12.0662	13.5271	13.2379	13.0774	13.1809	12.9976	13.0938
LE01Gene01105	11.3972	11.005	10.8092	10.2299	10.3162	10.3583	9.95445	10.2783	10.1133	11.0433	11.0154	11.0384	10.4521	10.0903	10.5133	10.5472	9.66945	9.89305
LE01Gene01106	12.2975	12.5857	12.3578	11.4779	11.6048	11.4505	11.4221	11.5116	11.2903	12.5134	12.0603	12.2384	11.4501	11.401	11.7231	11.4291	11.7223	11.5486
LE01Gene01107	14.1587	13.9648	13.6454	12.3971	12.7313	12.3451	12.3705	12.7747	12.4031	14.3482	14.4192	14.253	12.6139	12.5199	13.0726	13.4374	12.5999	12.5643
LE01Gene01108	11.2594	11.1119	10.9879	10.4925	10.5344	10.5538	10.4104	10.5516	10.3641	11.1562	11.2747	11.2694	10.6954	10.6581	10.5712	11.0429	10.5213	10.283
LE01Gene01109	6.6175	7.18654	6.64636	7.6247	6.92357	7.72459	7.29922	7.08978	7.19066	6.12768	6.25103	5.47173	6.38101	6.06	6.77421	6.57465	6.07922	6.95652
LE01Gene01110	0	0	3.19985	0	2.24281	0	3.95961	3.51115	2.45911	4.04717	4.34147	0	4.43203	4.12346	5.43795	4.47214	2.40534	2.79936
LE01Gene01111	10.3156	10.8001	10.8861	11.6045	11.2031	11.6952	11.6285	11.2323	11.4292	10.4146	10.4122	10.2402	10.8504	10.8577	10.2353	10.0878	10.5464	11.1283
LE01Gene01112	7.79686	8.13317	7.79502	7.97806	7.66907	7.97997	7.66961	7.32321	7.55227	8.17162	8.69152	8.30716	8.0338	7.56572	7.5059	7.53444	7.32203	8.22432
LE01Gene01113	7.17077	7.34796	7.37228	7.1557	6.82012	6.61705	6.59756	6.05592	6.59393	8.27922	8.3261	8.38323	8.46667	8.41033	8.0964	7.45825	7.74688	8.0351
LE01Gene01114	4.89709	5.29729	4.77535	6.78854	6.20549	6.89621	5.88833	6.44844	6.39621	4.35154	3.94996	4.59702	5.92806	6.60946	5.08972	6.92848	6.12436	6.84873
LE01Gene01115	7.5421	7.44634	7.39585	9.29536	8.81949	9.3791	9.31449	8.99331	9.57017	7.37526	7.66792	7.48011	9.14273	9.39169	9.03532	10.4845	9.47406	9.19035
LE01Gene01116	7.95171	8.7457	8.51869	10.6548	10.2613	10.4107	10.0746	9.99924	10.0382	7.20537	6.95821	7.5671	9.50792	9.01694	8.81149	9.06367	8.61501	9.82673
LE01Gene01117	10.4348	10.298	10.3775	9.38283	9.90473	9.69977	9.78823	10.1847	9.8853	10.5654	10.6021	10.7716	9.81716	9.93094	10.5673	10.5855	10.0297	9.8393
LE01Gene01118	9.73065	9.5176	9.55562	8.97816	9.20207	9.03064	8.89287	8.53641	8.49096	9.73034	9.72962	9.27935	8.62208	8.24093	8.00654	8.11129	8.53369	8.08346
LE01Gene01119	11.515	11.195	11.1387	10.2679	10.5207	10.3488	10.5652	10.7087	10.3518	11.7274	11.6513	11.7134	10.8815	10.728	11.165	10.9377	10.4915	10.4825
LE01Gene01120	11.2208	11.8697	11.218	10.5632	10.7238	10.377	10.2515	10.4841	10.4126	11.7504	11.3644	11.0692	10.3378	10.4899	10.2707	10.2623	10.7644	10.6998
LE01Gene01121	9.11723	9.9184	9.45073	8.70918	8.44372	9.13942	8.51158	8.59967	8.61201	9.1618	8.76046	8.86118	8.55546	8.63387	8.70125	8.57131	8.73627	8.27147
LE01Gene01122	10.4025	10.2523	10.025	9.91783	9.83568	10.045	9.68144	9.57241	9.19436	10.4915	10.2909	10.4482	9.79453	9.00613	9.88745	9.49297	9.17212	9.59986
LE01Gene01123	13.2435	13.292	13.0566	12.3055	12.443	12.1302	12.2639	12.4437	12.1866	13.4385	13.3951	13.1691	11.8478	12.1185	11.6448	12.3452	11.9979	11.5327
LE01Gene01124	9.17227	9.94669	9.99825	9.5393	9.83715	9.70472	9.63156	10.5998	9.62873	10.1133	9.84749	9.77079	9.50977	9.50541	9.49167	8.8583	9.66755	9.76051
LE01Gene01125	7.66873	7.71328	7.59908	10.1651	9.70142	10.0489	10.3202	9.12546	10.0957	6.22451	6.39013	6.7129	9.28369	9.21058	8.6796	9.4323	9.54633	9.7203
LE01Gene01126	11.5724	12.1489	11.1919	9.4653	9.87779	9.80798	9.20606	9.94851	9.55083	11.9026	11.5823	11.1464	9.10646	9.01694	8.98327	9.31958	8.83121	9.39369
LE01Gene01127	8.06755	8.14298	8.06876	8.16109	8.24502	8.36469	8.41233	8.16511	8.59952	7.44121	7.96914	7.98407	8.2264	8.32594	8.80484	8.38265	8.53369	8.80767
LE01Gene01128	9.88554	9.81632	10.1607	10.3189	10.2088	10.527	10.6185	10.3662	10.2368	9.63493	9.62962	9.71647	10.2684	10.2176	10.363	10.1294	10.1272	9.94632
LE01Gene01129	10.8144	11.1814	10.6361	10.0671	10.0362	9.62342	9.77231	10.0525	9.80957	10.6358	10.1414	10.2414	9.80664	9.62677	9.81651	9.72203	10.0193	9.97652
LE01Gene01130	12.8417	12.3348	12.6565	11.9679	11.6773	11.9228	11.4771	11.406	11.5499	12.7461	13.0834	12.8653	13.1241	12.5948	12.4231	12.2602	12.1255	11.9284
LE01Gene01131	11.5269	11.3708	11.7449	11.1896	11.0729	11.2439	10.9475	10.8299	10.7345	11.8413	11.7418	11.8589	12.1423	11.75	11.9155	11.2492	11.2418	11.499
LE01Gene01132	10.7458	10.7751	10.0721	12.0946	11.3511	11.4763	11.9813	11.0305	11.6171	9.71543	8.86852	9.20238	10.5535	10.4446	9.35043	9.51612	10.0445	10.6372
LE01Gene01133	13.0195	12.9806	13.196	12.9217	13.1199	12.9943	12.7214	13.1276	12.5799	13.1145	12.8171	13.0527	12.7701	12.3028	12.7766	12.3516	12.0093	12.4962
LE01Gene01134	11.3768	11.6348	11.2453	10.6922	10.9159	10.8375	10.5675	11.0211	10.7336	11.9146	11.5768	11.6881	10.8497	10.8134	11.3737	11.143	10.9692	10.7908
LE01Gene01135	11.897	11.3608	11.6994	10.2727	10.6335	10.3718	10.3216	11.0819	10.5988	12.3684	12.1224	12.2444	10.8972	10.8433	11.4724	10.6658	10.6809	10.4542
LE01Gene01136	14.996	14.9305	14.6343	13.9879	14.0773	14.0155	13.5161	13.8077	13.7435	14.7161	14.6933	14.4756	13.7961	13.763	13.9917	13.6893	14.0131	13.7843
LE01Gene01137	8.3913	8.67306	9.05377	10.2161	9.77088	10.0695	9.83689	9.68242	10.0489	9.49443	9.29316	9.75403	10.0089	10.1808	10.3482	10.1551	10.2314	10.3427
LE01Gene01138	10.3666	10.3144	10.288	10.0404	10.3382	10.3687	10.24	10.6228	10.4268	9.96842	10.2052	10.4751	10.5088	10.2489	10.7772	10.541	9.98147	10.4725
LE01Gene01139	11.4159	11.6994	11.4169	10.1547	10.3568	10.2268	9.75215	10.1988	9.69287	12.4817	12.4738	12.3482	11.512	11.6927	11.1454	11.2149	11.409	10.9815
LE01Gene01140	12.2511	12.1351	11.8982	10.1494	9.548	9.66464	9.31449	9.31879	9.2699	13.0121	13.1665	12.8916	11.5557	11.7301	11.165	12.2426	11.947	11.2691
LE01Gene01141	9.09603	9.48325	9.24546	10.2569	9.91034	10.0054	10.2004	9.42521	10.2069	9.17155	8.91821	9.29796	8.73411	9.26598	9.4518	8.50131	9.50639	9.72539
LE01Gene01142	9.91139	9.35825	10.083	11.5453	10.4608	11.5674	10.7755	9.50998	10.9711	8.16675	8.23214	8.21221	10.3347	9.64952	8.87635	9.83849	9.63672	9.92878
LE01Gene01143	11.1281	11.029	11.1698	11.963	11.8238	12.0982	12.0625	11.9971	12.0371	11.2437	11.2853	11.454	12.027	12.381	12.525	12.3363	12.3181	12.106
LE01Gene01144	6.54982	7.99372	6.96278	6.61688	6.68271	6.55993	6.50424	7.91453	7.14554	8.98514	9.21109	8.84544	8.42407	9.56553	11.1182	8.69082	10.2658	8.90656
LE01Gene01145	8.55903	8.65945	8.22608	9.3001	8.945	9.23146	9.34172	8.98445	9.20814	7.63685	7.61925	7.85173	9.06673	9.18685	8.88897	8.8046	8.45637	9.79964
LE01Gene01146	12.6632	12.4887	12.7047	13.1496	12.9008	13.2096	13.3371	12.9457	13.1106	12.3087	12.295	12.5403	13.1084	12.8095	12.9468	12.6857	12.6962	13.3746
LE01Gene01147	12.5942	12.3162	12.6037	12.719	12.5151	12.6264	12.4266	12.4016	12.2476	12.1914	12.0304	12.1276	12.297	11.377	11.6861	11.8942	11.21	12.289
LE01Gene01148	14.5542	14.7877	14.6537	14.7123	14.1875	14.4941	13.7181	13.4611	14.0109	14.5802	14.3997	14.1801	14.1723	13.5873	13.7653	14.3395	14.0906	13.9302
LE01Gene01149	9.31567	9.38744	9.87227	10.5808	10.366	11.0067	10.5336	10.4523	10.6217	10.3387	10.921	11.0529	11.5955	13.0279	12.836	12.1817	13.2187	12.666
LE01Gene01150	10.0066	9.62127	10.1914	12.0158	11.3325	11.6956	12.2297	11.2886	11.7341	9.84746	10.5259	11.0439	12.517	12.389	12.4519	12.9934	12.9283	13.4896
LE01Gene01151	10.9766	11.0727	11.0511	11.8165	11.7186	11.8713	11.8086	11.834	11.4744	10.3059	10.3249	10.4166	10.983	10.7916	11.1249	10.5369	10.7089	11.0241
LE01Gene01152	12.7144	12.6776	12.2921	11.6268	11.8407	11.6667	11.8448	12.0369	11.5325	12.9264	13.1458	13.0076	11.9632	12.2962	12.0801	12.236	12.0653	11.251
LE01Gene01153	12.1605	11.9764	12.0677	10.6859	10.7907	10.738	10.3949	10.3294	10.5226	12.08	12.3906	12.2732	10.7567	10.7305	10.3899	10.9663	10.9076	10.4583
LE01Gene01154	8.99023	8.91274	10.1619	10.8898	10.9806	11.1129	11.2278	11.1362	11.497	12.5568	13.9494	13.7327	13.7347	15.4785	14.8153	13.9948	15.9098	14.552
LE01Gene01155	6.73184	6.72013	6.77178	8.21728	8.18151	8.40983	9.44829	9.82491	8.70826	5.79081	5.37409	7.12101	7.42041	7.12103	8.54644	6.72674	7.36967	7.33057
LE01Gene01156	6.69473	6.14851	6.96278	7.73379	7.59439	7.77565	8.13569	7.92073	8.10551	7.34973	7.53181	7.77407	8.24877	9.01694	8.58188	8.51391	7.95484	8.05679
LE01Gene01157	3.76539	4.89443	4.8225	5.17546	5.7848	5.35778	3.57515	5.64059	5.81018	5.08768	4.85527	5.05659	4.81435	5.08147	4.74539	4.66527	4.55841	4.7459
LE01Gene01158	11.4211	11.7468	11.7225	10.4398	10.9483	10.3934	9.9824	11.8613	10.2727	12.1544	11.9377	11.9744	10.4473	10.0801	10.7182	10.1375	10.2709	10.0768
LE01Gene01159	11.4813	11.0649	11.2869	10.8132	10.8297	10.7832	10.8608	10.6332	11.0165	11.7287	11.7177	12.0016	11.4341	11.0613	11.2982	11.1711	11.09	10.6209
LE01Gene01160	10.972	10.7884	10.6574	9.38283	9.60097	9.55199	8.59542	9.16521	9.0178	11.2478	11.308	11.098	9.17812	8.45472	8.71195	8.7874	8.79677	8.30358
LE01Gene01161	10.3646	9.9184	10.4553	11.014	10.6892	11.1387	11.2263	10.0525	11.3832	8.92591	9.17066	9.25811	10.8089	11.294	10.8066	12.1571	11.6359	11.6003
LE01Gene01162	11.4347	11.3987	11.3005	11.4537	11.3822	11.5172	11.5337	11.5798	11.5799	11.0986	11.1718	11.2846	11.3056	11.5258	11.4969	11.3673	11.3556	11.3416
LE01Gene01163	11.0328	10.5721	11.4212	11.8541	11.6224	11.8584	11.9569	11.871	12.1417	11.2746	11.5188	11.2474	12.1651	12.6283	12.0129	12.4056	12.6298	11.5662
LE01Gene01164	11.1827	10.9758	11.0853	11.9202	11.5874	11.7332	12.2956	11.5906	12.173	10.466	10.5604	11.0467	12.1474	12.1169	11.8468	11.9162	11.8441	11.9539
LE01Gene01165	14.2483	14.1794	14.2502	13.805	14.392	13.8018	13.9909	14.5696	13.762	13.6908	13.9669	13.9185	14.5549	14.5101	14.8891	14.4131	14.4161	13.5279
LE01Gene01166	2.4593	4.52579	3.19985	3.21224	3.90684	3.84152	3.04948	3.22051	0	2.28775	3.7578	4.33388	3.49736	2.28267	0	2.38927	2.67174	0
LE01Gene01167	13.0368	13.2504	13.4735	13.3919	13.5889	13.5582	13.5682	13.958	13.2356	13.2963	12.9786	13.1993	13.789	14.1463	13.7543	14.0074	14.66	14.0071
LE01Gene01168	6.92585	6.50872	7.23089	6.76131	7.80171	6.73785	6.46515	6.75669	6.67556	6.44949	6.68854	6.56704	6.01412	6.29122	5.71825	6.45776	5.74539	6.25757
LE01Gene01169	5.57879	4.79836	5.53893	5.47269	5.0732	5.39091	4.659	6.22594	5.52317	5.98019	6.37346	5.53587	5.11629	4.04116	5.71825	5.43926	4.74338	5.31283
LE01Gene01170	4.76007	2.75455	4.67615	4.90388	3.81416	4.45653	4.35128	4.44645	3.61434	6.1672	4.59259	4.91905	3.99745	3.65504	3.36405	4.47214	3.68014	2.79936
LE01Gene01171	10.4873	10.8459	11.5035	12.1326	11.94	12.0793	12.1506	11.51	12.4334	10.505	9.8625	10.5194	11.549	11.4128	11.0467	11.6087	11.6614	11.7728
LE01Gene01172	10.5767	10.7383	10.9366	11.7699	11.929	11.872	11.8116	11.8054	11.774	10.9121	11.0433	10.9299	11.901	11.8704	11.9693	11.856	12.0628	12.4565
LE01Gene01173	11.3798	12.2006	11.7822	11.6097	11.5211	11.3826	11.1413	11.1587	11.2056	11.462	11.2898	11.3249	10.6566	10.4486	10.6915	10.6401	11.0843	10.8012
LE01Gene01174	13.6052	13.2431	13.3025	13.1381	13.2925	13.1573	12.7704	13.2423	12.7556	13.123	13.3582	13.4296	13.1623	13.0635	13.0278	12.7893	12.4988	12.8164
LE01Gene01175	6.80333	7.63894	7.40363	7.71971	8.10533	7.29661	7.12209	7.49941	7.49046	6.51221	6.76722	5.74026	7.09467	6.80917	6.56979	6.12686	6.94815	7.33057
LE01Gene01176	9.98369	10.448	9.58497	7.12398	6.27669	6.58877	6.3411	6.37802	6.7826	12.0974	12.058	11.9726	9.14988	10.0684	8.96549	7.03724	9.68648	8.66665
LE01Gene01177	10.3388	10.5694	10.3446	9.94531	10.2437	9.88702	9.98413	10.4253	9.78587	10.601	10.5585	10.4679	10.2407	10.3968	10.1888	9.86332	10.4197	10.1468
LE01Gene01178	11.3362	11.6217	11.4762	11.0953	11.1323	11.0273	11.0268	11.3106	11.3287	11.6314	11.3491	11.3811	10.8555	11.2292	11.4108	11.0538	11.5229	11.1768
LE01Gene01179	8.70927	8.30908	8.71576	12.5506	11.5008	12.8379	13.4225	11.5002	13.8741	7.17661	8.22751	8.56714	12.1014	13.3303	11.8512	13.8521	14.3093	13.1689
LE01Gene01180	11.2246	10.869	11.1578	11.2293	11.1148	11.1808	11.2588	11.236	11.1716	11.105	11.236	11.4341	11.6038	11.5928	11.597	11.3405	11.316	11.1989
LE01Gene01181	14.1263	13.9853	14.2449	13.244	12.8942	12.8902	12.431	12.7533	12.1288	13.4464	13.4513	13.8548	13.5479	13.0604	13.9546	14.1125	12.9195	12.8523
LE01Gene01182	8.61639	8.56407	8.681	8.22228	8.19076	7.83704	7.52506	7.72894	8.09368	8.21468	8.0965	7.48011	7.70551	7.91674	7.78798	6.71223	7.1796	7.33057
LE01Gene01183	6.81491	7.49312	6.35714	6.8926	6.53081	7.17825	6.38365	5.98661	6.7826	7.30615	7.12685	6.53601	4.66272	6.1012	5.33095	6.03658	6.03263	4.23909
LE01Gene01184	8.58968	8.7197	8.40712	6.0912	6.50138	7.03889	6.8761	6.59535	6.45288	9.20515	9.27756	8.63826	6.83571	6.98456	6.15458	6.5257	6.81682	5.41715
LE01Gene01185	12.6975	12.23	12.6434	12.095	11.8223	12.096	12.0849	11.8805	12.1364	12.6821	12.8869	12.5817	12.3492	12.6105	12.0597	12.4036	12.5465	12.3698
LE01Gene01186	7.52105	7.46992	7.02457	7.16612	7.061	7.50765	7.56258	7.75696	6.86843	7.67161	6.87775	6.88284	6.87074	7.00641	7.27524	7.10544	7.13619	7.02416
LE01Gene01187	12.0365	11.8167	12.3038	11.8041	12.1329	11.9086	12.044	12.4675	12.0639	11.5445	11.4208	11.5662	11.7971	11.7127	11.9213	11.4706	11.5893	11.5181
LE01Gene01188	9.43113	9.30024	10.4222	14.9175	13.9493	14.7995	15.4789	13.4476	15.1889	7.99074	7.63333	7.87671	13.9055	13.798	12.2647	13.4583	13.6399	13.7871
LE01Gene01189	5.06163	6.39835	5.8202	11.9105	11.0451	11.6527	12.5693	10.6492	12.0201	6.18655	6.35659	6.36998	11.2227	11.0954	9.38204	9.67605	10.4588	11.4367
LE01Gene01190	9.46826	9.70976	9.37169	9.86124	9.50045	9.83381	10.4435	9.31408	9.99431	9.66284	9.68809	9.82955	9.96225	10.1736	9.42603	9.86332	10.0605	10.2433
LE01Gene01191	8.32403	7.7329	7.96225	13.7818	12.4451	13.6019	15.0104	12.5368	14.8777	8.35389	7.82944	8.97256	13.1393	13.3339	12.2641	13.2461	13.1865	13.2433
LE01Gene01192	9.1102	8.62485	9.637	10.2299	10.6843	10.4077	11.2124	11.3393	10.7288	8.62615	8.19941	8.66718	10.7236	10.5507	10.7941	10.5654	10.1533	10.9822
LE01Gene01193	11.8851	12.072	11.8382	11.3935	11.2842	11.1484	11.0739	10.9786	10.7814	11.7012	11.2215	11.2061	10.1722	9.80256	9.68691	10.5224	10.13	9.99208
LE01Gene01194	9.20123	9.10823	9.40499	8.70203	8.78937	8.59536	8.59089	9.05668	8.1689	8.02341	8.05005	7.77407	6.51989	6.80917	7.02364	7.77679	6.94815	7.37443
LE01Gene01195	13.7457	13.4624	13.4359	12.8049	13.1504	12.815	12.8484	13.2189	13.0253	13.9354	14.0782	14.0891	13.2188	13.1854	13.3068	13.3953	13.3915	12.6859
LE01Gene01196	5.97941	5.10988	6.92006	5.87958	8.12476	6.17872	4.85316	3.75294	5.92145	5.44997	7.57619	5.33419	7.72478	5.759	7.69035	7.01377	5.45864	8.63093
LE01Gene01197	8.94617	8.6526	8.78881	10.6173	9.0978	10.7925	10.5881	10.1809	10.6623	7.43313	7.12685	7.67785	8.49314	9.54887	8.18099	8.66091	9.28078	8.81723
LE01Gene01198	11.3724	10.5884	11.3671	10.357	10.0903	10.6251	10.3078	10.0957	10.3229	11.5746	11.8546	11.2018	10.9459	11.1621	10.2719	10.5865	10.6504	10.5172
LE01Gene01199	9.95782	9.60006	10.1778	11.9047	11.1596	11.7552	12.2724	11.0261	12.2298	9.35168	9.8262	9.71647	11.6645	11.9126	11.2147	12.2033	12.259	12.0155
LE01Gene01200	11.507	11.9212	11.2884	8.95731	9.47608	9.40771	9.35515	9.37863	9.65312	12.5206	12.2438	12.5179	9.81416	10.1031	9.78476	9.64009	10.1105	10.0158
LE01Gene01201	16.1932	15.8584	15.6654	15.2424	14.9035	15.196	14.8236	15.0209	14.6582	15.1617	15.272	15.1281	14.8946	14.1277	14.1534	14.9059	14.0594	14.383
LE01Gene01202	12.844	12.3897	13.1015	12.6336	12.8506	12.9395	12.2546	12.9017	12.4753	12.7865	13.0219	12.7772	13.4085	13.7552	12.7731	12.8882	13.5041	12.6275
LE01Gene01203	10.1654	10.0323	10.738	11.0933	10.9414	11.012	10.7634	10.32	10.7534	9.84898	10.0486	9.89215	11.2034	11.0684	10.6986	10.6401	10.9181	11.2933
LE01Gene01204	7.22385	7.68669	8.22608	7.59416	7.69529	7.35653	8.42766	7.75696	8.30851	7.44121	7.4063	7.22195	7.24463	7.69918	7.84742	7.93509	7.79653	7.9737
LE01Gene01205	10.2121	10.4657	10.3078	10.5242	10.3711	10.5818	10.6922	10.4242	10.5692	10.5185	10.302	10.7087	10.6202	10.7206	10.7349	10.2435	10.8108	10.8432
LE01Gene01206	8.53823	7.61799	8.20399	9.97968	9.70304	9.79721	10.1779	9.51614	10.1031	7.51197	8.02358	8.14696	9.89295	8.98427	9.87481	9.45208	9.30057	9.8471
LE01Gene01207	11.9852	12.5437	12.1267	13.8864	13.653	13.5995	13.8744	13.352	13.6553	11.968	11.7699	11.7729	12.7238	13.0212	12.8026	12.8197	13.4754	13.5351
LE01Gene01208	11.881	11.5335	11.8125	12.2265	12.0856	12.1387	12.114	12.2426	11.8906	11.8989	11.9745	12.5062	12.6657	12.4726	12.7158	12.2998	12.1318	12.7652
LE01Gene01209	12.2952	12.377	11.9836	10.8313	11.1772	10.6989	10.4117	11.1249	10.5488	12.3718	12.5682	12.4669	11.5494	12.1359	11.7953	11.4989	11.9121	11.539
LE01Gene01212	13.474	13.6652	13.2917	13.4855	13.4764	13.3633	13.5527	13.3653	13.622	13.6076	13.5896	13.6529	13.334	13.3388	13.4503	13.3142	13.4133	13.6572
LE01Gene01213	11.3675	11.4129	11.1538	10.131	10.3486	10.1955	9.7783	10.5028	9.88701	11.1464	11.0254	11.0746	10.2092	10.1748	10.6232	10.7221	10.0591	10.0581
LE01Gene01214	11.4361	11.4341	11.3951	11.8338	11.5216	11.8476	11.6296	11.3041	11.4162	11.4079	11.2532	11.4994	12.2857	12.1328	12.1747	12.3892	12.3075	11.9557
LE01Gene01215	10.551	10.9778	10.8666	10.5612	10.476	10.5674	10.811	10.7176	10.9467	10.9395	10.5344	10.63	10.6047	10.5865	10.7592	10.6863	10.6752	10.5681
LE01Gene01216	7.08731	7.6596	8.05401	8.24703	8.24058	8.36885	9.41534	8.2806	9.29595	7.48095	6.39013	6.53601	7.33937	7.6857	6.56979	7.49261	7.5459	7.65605
LE01Gene01217	12.8552	12.5386	12.9313	12.0919	11.9325	11.8364	12.0881	11.3804	12.2315	12.5445	12.3924	12.4193	11.9777	11.7342	11.2501	12.6289	11.8018	11.1718
LE01Gene01218	8.96447	9.35192	9.81949	10.4664	10.5298	10.4691	10.2601	10.4088	10.3318	8.40022	7.99116	7.66357	9.86861	9.15051	8.93232	9.69646	9.33218	9.9579
LE01Gene01219	11.8713	11.6477	12.0985	12.8256	12.9221	12.826	13.663	13.0725	14.0048	12.159	12.8638	12.7917	13.3291	13.8776	13.6224	13.8584	14.1602	13.5535
LE01Gene01220	9.72453	9.60716	10.0287	10.3189	9.82681	9.88121	10.0132	9.67326	9.62051	9.437	9.18267	9.14955	9.53365	9.43464	9.03816	8.51809	9.37716	9.87942
LE01Gene01221	11.2472	11.1342	11.2753	11.0097	11.0284	11.1222	11.3149	11.1005	11.3469	11.4585	11.5193	11.4545	11.1462	11.3786	11.2707	10.9432	11.3668	10.9095
LE01Gene01222	11.3342	11.1507	11.2853	11.2174	11.0252	11.2479	11.6107	10.9007	11.4987	10.9628	11.0963	11.4267	11.5462	11.6081	11.2022	11.9003	11.5696	11.0953
LE01Gene01223	11.009	10.9717	11.1658	10.0973	10.2381	10.4258	10.152	10.1429	10.0211	11.1986	11.3194	11.3914	10.6757	9.93094	10.6724	10.246	10.2301	10.0392
LE01Gene01224	13.1094	13.0374	12.9286	11.1877	11.4712	11.1036	10.6996	11.5416	10.9614	13.4085	13.239	13.1356	11.5548	11.3067	11.7742	11.4118	11.1431	10.716
LE01Gene01225	10.586	10.8209	11.2103	11.8264	11.5152	11.6856	11.8242	11.2856	11.6207	10.4319	10.1597	10.2147	11.2949	10.7468	10.6099	11.0681	11.0757	11.2824
LE01Gene01226	8.4776	8.67981	9.43185	9.14809	9.59228	9.35831	9.04641	8.69689	9.72582	8.51951	7.97468	8.18746	8.74673	8.75176	8.55042	9.87477	9.22229	9.0675
LE01Gene01227	8.90343	8.70322	8.60887	9.18186	9.24264	9.27869	9.70889	9.37637	9.78587	9.43295	9.07336	8.95507	10.38	10.9959	10.402	10.463	10.97	10.3205
LE01Gene01228	13.2509	13.4206	13.0255	11.3312	11.9948	11.4935	11.2343	12.0909	11.2342	13.9393	13.7276	13.5235	12.173	12.2046	12.0781	11.8821	11.882	11.3564
LE01Gene01230	10.895	11.1974	11.4706	9.08085	10.7693	9.40163	8.97168	10.5345	9.78403	9.54217	10.0248	9.51241	8.52647	11.3911	9.15517	7.25306	11.1594	8.81087
LE01Gene01231	11.5304	11.6321	11.4388	11.379	11.3309	11.2199	11.3714	11.472	11.3122	11.7897	11.9044	12.0009	11.9324	12.2283	11.9962	11.4787	11.9004	11.8614
LE01Gene01232	10.5767	10.6395	10.7365	10.2763	10.6512	10.3233	10.2211	10.7589	10.3025	10.3803	9.99782	9.85806	10.1307	10.5178	10.1302	10.2586	10.45	10.2956
LE01Gene01233	7.5697	8.83012	8.49342	9.65848	10.0541	9.83982	10.2995	10.7024	10.6391	7.6227	7.9524	6.91937	9.7607	10.8204	10.2982	9.87477	10.3262	9.88094
LE01Gene01234	14.7798	14.5134	14.6825	14.7159	14.6934	14.5882	13.9376	14.2828	14.6621	13.2754	13.401	13.3903	13.9454	13.6604	14.1258	14.8107	14.344	14.2496
LE01Gene01235	10.1276	9.59827	9.56778	11.1541	10.517	11.4613	11.2042	10.4512	12.0605	10.0657	10.0407	9.75572	11.139	11.2199	11.1996	12.1728	11.8938	12.0193
LE01Gene01236	8.32403	7.56057	8.43393	9.31657	9.02213	9.45938	9.81956	9.27101	9.73727	8.59389	8.88036	9.15976	9.6339	9.44867	9.62031	9.18684	9.50852	9.5395
LE01Gene01237	11.7664	12.0497	11.7777	10.429	10.6087	10.2918	10.6017	11.1475	10.472	12.3813	11.9995	12.2156	10.6591	10.5386	10.8573	10.2992	10.5772	10.4552
LE01Gene01238	11.872	11.8844	11.9657	11.171	11.444	11.0579	11.1848	11.3854	11.168	11.7813	11.803	11.6578	10.979	10.8041	11.0649	10.9995	10.7337	10.6954
LE01Gene01239	10.3557	9.94108	10.2572	10.4611	10.362	10.5298	11.308	11.3276	11.2342	9.53086	9.04469	9.32997	10.5881	10.9821	11.324	11.1116	11.2939	10.9843
LE01Gene01240	11.4782	11.0124	10.9163	10.7634	10.6612	10.9193	10.8188	10.8713	10.8205	10.8003	10.8913	11.1534	11.142	11.1182	11.1222	11.2778	11.0836	10.8564
LE01Gene01241	11.9065	11.5996	11.3701	11.2841	11.122	11.1961	11.082	11.257	11.2629	12.1047	12.2936	12.4809	12.1794	12.1062	12.631	11.9086	11.8567	11.908
LE01Gene01242	9.39302	8.94675	9.79606	8.88346	9.51893	9.33297	8.95061	9.36731	9.33416	9.39601	9.68809	9.94921	9.27282	9.38962	9.32277	9.37358	9.11736	8.7152
LE01Gene01243	10.1276	10.2511	10.4441	11.0768	10.4694	11.0815	11.1131	10.3305	10.8454	9.41049	9.50314	9.35907	9.95275	10.913	10.2402	10.2536	11.0943	11.3798
LE01Gene01244	5.91632	6.85758	6.29163	5.90469	6.05161	6.67199	6.40446	5.78366	6.39621	5.16778	6.03483	4.65594	6.2092	6.75855	6.84073	5.75453	7.06851	7.45015
LE01Gene01245	6.69473	6.78424	6.24046	4.6895	3.36918	5.4233	3.715	3.22051	5.29423	5.86477	6.37346	4.81949	5.83653	6.39427	3.50197	5.8896	6.18952	5.51443
LE01Gene01246	7.62993	8.56041	7.48648	5.53833	5.76017	5.10177	5.94625	5.86315	5.59207	8.17162	7.48601	7.43036	7.11429	6.55118	6.63121	6.71223	7.24237	6.63462
LE01Gene01247	12.1819	11.8281	12.1436	11.4398	11.5537	11.5144	11.2248	11.4924	11.2111	11.2432	11.7889	11.0631	11.986	12.9318	11.9086	12.28	12.7608	12.363
LE01Gene01248	13.2465	13.3707	14.2727	16.3584	15.9173	16.0588	16.0914	16.014	15.7356	9.65765	8.00205	9.72681	13.0474	12.9142	12.9039	14.1788	13.6586	12.524
LE01Gene01249	8.66198	8.88377	10.4184	11.591	11.1466	11.5284	12.0037	11.1931	11.9772	6.65801	5.83013	5.36983	9.049	9.98009	10.0746	10.3052	10.7732	8.89155
LE01Gene01250	8.743	8.94114	9.04386	9.82882	9.81789	9.80183	9.86906	10.3141	10.2595	8.7088	8.28212	8.64554	9.32216	9.79001	9.51223	9.65154	9.87325	9.8204
LE01Gene01251	10.0116	9.9026	10.1527	9.69311	10.1401	10.1023	10.323	10.2832	9.94248	9.81674	9.7684	9.84546	9.50606	9.9079	9.8764	9.97994	9.55871	9.86873
LE01Gene01252	9.43113	9.88078	9.43185	9.83699	10.0413	9.97294	10.0648	10.0369	10.0038	9.93161	9.84749	9.97835	9.95818	10.0276	10.1939	9.67418	10.2211	10.1817
LE01Gene01253	10.9938	10.9765	10.6419	9.98263	10.2701	9.94254	10.0149	10.619	10.1764	11.3098	11.7632	11.9503	11.0514	11.0135	11.6919	11.0232	10.8254	10.9829
LE01Gene01254	11.5074	11.1287	11.1376	10.2149	10.6	10.2575	10.1596	10.5213	10.3715	11.0696	10.9944	10.918	10.3157	9.42453	10.2427	10.3886	9.76874	9.56999
LE01Gene01255	11.0353	10.9654	11.1692	10.9086	10.8583	10.9348	11.09	11.075	11.0928	11.0219	11.0649	10.9134	10.7707	10.2292	10.789	10.4467	10.4785	10.3787
LE01Gene01256	8.98512	8.66627	7.57863	7.83521	7.99354	8.33094	7.3644	8.51195	7.81978	8.22876	8.99106	8.05145	7.88184	7.69918	8.18611	8.16554	6.92282	7.35704
LE01Gene01257	8.69994	8.96899	8.60213	10.772	10.7467	10.7429	11.156	10.7327	11.1302	9.49054	9.81081	9.76243	10.8126	11.5838	11.1381	10.6808	11.6866	11.5376
LE01Gene01258	7.38786	7.15779	7.28239	8.19201	7.70822	8.18275	7.92859	5.18448	7.93034	8.09174	8.60133	8.6419	8.15242	8.59112	8.31804	8.11129	8.38398	8.55293
LE01Gene01259	12.1333	12.0933	11.9975	10.7119	11.5644	10.9341	10.4868	11.6752	10.5894	12.9141	13.4475	13.5649	11.8126	12.0209	12.3182	11.3817	11.6634	11.8085
LE01Gene01260	11.8387	12.0389	11.6582	11.399	11.6532	11.3847	10.8447	11.6314	11.1265	11.5983	11.4034	11.4388	10.8051	10.719	10.627	10.5825	11.1175	11.4117
LE01Gene01261	12.5688	12.8569	12.5259	12.0082	12.0803	12.0413	12.283	12.2564	12.4477	12.8402	12.7501	12.782	12.0199	12.5206	12.1309	12.3384	12.821	12.4292
LE01Gene01262	9.78317	10.3572	9.75412	9.09999	9.1294	8.44575	8.8706	8.99919	8.76903	10.046	9.66602	9.97402	9.24639	9.49964	8.74705	8.60704	9.28078	9.09397
LE01Gene01263	11.1035	11.2225	11.0847	10.2895	10.6579	10.4564	10.1209	10.6925	10.3166	10.9733	10.6296	10.4934	9.62709	9.55444	9.42603	9.57744	9.55871	9.3216
LE01Gene01264	9.00547	9.31767	9.25838	9.50893	8.87216	9.21768	8.90387	9.34902	9.07006	8.73533	9.19932	8.75064	8.96234	9.37499	9.43252	9.02897	9.56691	8.81087
LE01Gene01265	7.47801	7.33089	5.99502	7.3601	6.85544	7.23409	7.35374	7.05635	7.12243	5.86477	5.34018	3.71206	5.92806	5.62416	5.43795	5.66696	5.49347	5.69129
LE01Gene01266	9.8759	9.89971	10.045	11.1774	11.0239	11.072	11.3149	11.039	11.1581	9.27915	9.21109	8.97256	10.4071	10.148	9.69772	10.4101	10.2896	10.6885
LE01Gene01267	11.1738	10.9141	10.8453	12.0605	11.5087	11.7592	12.1648	11.2729	12.0425	11.0735	10.9662	11.5069	12.1227	11.605	12.0516	11.7837	11.4147	11.8303
LE01Gene01268	9.56913	9.4967	9.87087	10.384	10.0829	10.4417	10.6129	10.3832	10.796	9.12214	9.48191	9.73537	10.589	10.4446	10.5265	11.3563	10.5993	11.1879
LE01Gene01269	12.7202	13.1815	13.1343	12.6204	12.6995	12.4969	12.6828	13.0893	12.5391	13.179	12.8067	12.7407	12.5498	12.8323	12.6382	12.891	13.2047	12.9729
LE01Gene01270	11.423	11.0822	11.1457	11.2218	11.187	11.2636	11.0836	11.1705	11.1098	11.5289	11.599	11.5895	11.1118	11.1468	11.3053	10.9807	11.0707	10.9949
LE01Gene01271	10.8896	11.3181	11.242	11.4717	11.2464	11.2164	11.3059	11.1449	11.3494	10.7987	10.3947	10.1623	10.5793	10.4446	10.1421	10.6882	10.8108	10.6824
LE01Gene01272	12.2158	12.8675	12.5306	11.5944	11.8444	11.5701	11.4227	12.2264	11.3917	13.1648	12.5597	12.918	11.7749	11.8353	12.2282	11.0415	11.731	12.2947
LE01Gene01273	12.0649	12.2088	12.2568	11.5954	11.9459	11.7493	11.8159	12.1426	11.7202	16.1755	16.1614	16.7886	16.0992	16.3557	17.1161	16.9227	16.3527	15.2774
LE01Gene01274	11.0482	11.7636	11.3314	10.4935	10.6377	10.4979	10.3871	10.5813	10.2475	11.0657	10.8497	10.6003	9.76536	9.53953	9.17593	9.59336	9.90108	9.47046
LE01Gene01275	12.2838	12.5776	12.7532	13.3177	13.1079	13.3189	13.2586	13.079	12.8652	12.0512	11.8788	11.7808	12.6812	12.209	12.0265	12.0433	12.245	13.1409
LE01Gene01276	12.7742	13.1537	13.1598	13.5188	13.2934	13.506	13.4301	13.0585	13.3698	12.6596	12.3129	12.3982	12.9843	12.9662	12.7439	12.667	13.019	13.4854
LE01Gene01277	8.6197	8.26033	7.49378	10.0573	9.57649	9.79411	10.7122	9.70956	9.96051	11.1525	9.53909	9.45135	10.4807	10.7646	9.57609	10.6238	10.5536	10.6754
LE01Gene01278	11.7933	11.8548	11.7937	11.3818	11.61	11.3837	11.3575	11.7015	11.497	11.9614	12.258	12.0924	12.0283	12.659	12.3896	11.6942	12.4339	12.0801
LE01Gene01287	12.2594	12.079	12.0393	10.2666	10.6728	10.3233	9.49997	9.89278	9.56375	11.8148	11.8902	10.9172	9.59079	8.93954	8.75397	9.26595	8.92349	8.31712
LE01Gene01288	15.1425	15.0921	15.436	13.5965	14.1556	13.6673	12.7636	14.5896	13.0453	15.389	15.1594	15.3013	13.5624	13.4337	13.2677	13.6091	13.4829	12.9028
LE01Gene01289	11.0653	10.5465	10.6533	10.7686	10.7724	10.9592	11.1788	11.1469	11.0733	11.3881	11.7846	11.7528	11.7465	11.7023	12.0938	11.9537	11.5001	11.2362
LE01Gene01290	10.9274	11.2831	11.8694	13.4665	13.2297	13.2026	12.7	12.4749	12.7636	11.1806	10.5814	10.947	12.8575	12.5969	12.3888	12.3378	13.0438	13.1336
LE01Gene01291	11.7615	11.6339	11.5331	11.2636	11.4845	11.3867	11.3387	11.8117	11.5121	11.8982	11.9434	12.2492	11.8747	11.7321	12.3065	11.9842	11.5386	11.5813
LE01Gene01292	12.8242	12.7695	12.8157	12.4985	13.0382	12.7067	12.7269	13.2916	13.0298	13.1985	13.3347	13.3134	13.2237	13.3251	13.5621	13.4683	13.0733	12.9963
LE01Gene01293	12.0355	11.9965	11.9502	10.9745	11.851	11.5312	11.3394	12.0774	11.8691	12.3034	12.6474	12.6137	12.5424	12.8733	12.502	12.8233	11.98	11.7972
LE01Gene01294	11.6681	11.5363	11.7639	11.459	11.8905	11.4382	11.1901	11.8924	11.2767	11.8689	11.8425	11.9529	10.8313	10.7082	11.2761	11.3754	10.9669	10.9744
LE01Gene01295	11.8619	11.4667	12.1352	12.2733	12.2212	12.1808	12.1621	11.9081	12.1769	11.3081	11.5074	11.0474	12.4828	12.0336	11.3176	12.6435	11.6767	11.9188
LE01Gene01296	7.64298	7.58237	7.60584	7.1557	7.31886	6.82527	7.62598	7.52408	7.14554	8.10197	7.47824	8.15209	7.10451	6.95114	7.24608	6.86432	7.15806	6.97942
LE01Gene01297	5.09999	5.52448	5.95326	6.31369	6.65625	6.6854	6.3411	6.65612	6.48945	5.35051	5.80548	5.76724	6.36472	6.92843	6.64616	5.57374	5.56069	6.12008
LE01Gene01303	5.82767	5.14936	6.01546	6.2367	6.60184	6.88463	7.54394	6.75669	6.98829	5.24367	4.47249	4.87013	6.77538	5.03969	6.45557	5.69675	5.31028	6.40017
LE01Gene01304	10.5716	10.1006	10.6394	12.4215	12.0281	12.5326	12.2667	11.5345	11.894	9.26556	9.33681	9.80861	12.142	11.1651	11.5683	11.2623	10.6561	12.3474
LE01Gene01305	10.3217	9.8749	9.85678	9.19718	9.70466	9.13942	9.27831	9.95306	9.51358	10.5506	10.8085	10.7328	9.89153	9.84259	10.1939	10.0025	9.61514	9.357
LE01Gene01306	11.5626	11.3503	12.1512	12.5441	12.4104	12.6273	12.3886	12.315	12.4156	11.4156	11.3437	11.5609	12.5834	12.0983	12.2122	12.0448	11.6489	12.5503
LE01Gene01307	7.72504	7.77137	7.80092	8.1401	8.25387	8.15891	8.41746	8.90841	8.59533	7.594	8.25507	7.14177	8.61176	8.93954	8.67232	8.82834	8.55445	8.33054
LE01Gene01308	7.93058	8.10333	7.83581	7.33262	7.78959	7.21571	7.48654	8.25135	7.39728	7.594	8.12168	7.66357	7.71196	7.80895	7.65382	7.41411	7.63437	7.48257
LE01Gene01309	13.8599	13.8753	13.225	12.5291	12.8925	12.297	11.8072	12.7417	11.9865	13.5428	13.2315	12.831	11.2374	11.425	11.4201	11.9717	11.5161	11.3081
LE01Gene01310	5.31092	4.4645	0	0	0	3.10774	0	0	0	2.28775	2.27934	2.332	0	0	3.21153	0	0	0
LE01Gene01311	6.89345	7.2054	6.09442	6.1966	6.31101	6.17872	5.76501	6.97519	5.02198	7.09701	7.61925	6.5823	6.36472	6.74562	6.89181	5.66696	6.77497	6.33063
LE01Gene01312	8.53123	8.43023	8.31944	9.18442	9.50602	9.38938	9.56148	9.6113	9.44073	8.74842	9.11908	8.64554	9.82759	9.77577	10.261	9.33149	9.69024	9.73551
LE01Gene01313	7.22385	7.09851	7.06435	7.98396	7.94519	7.99081	8.22614	7.96944	8.03303	7.17661	7.38982	8.46376	7.80545	8.2863	8.36851	7.89712	7.99185	7.80449
LE01Gene01314	8.96187	8.65945	9.00095	10.2787	9.97732	10.2199	10.5971	10.2078	10.4432	8.83069	9.05519	9.36571	10.5354	10.3875	10.5405	10.0069	10.4243	10.8053
LE01Gene01315	10.6301	10.003	10.1767	8.86119	9.43388	8.74699	8.7127	9.11196	9.03337	10.9933	11.0784	10.7507	9.21493	9.00884	9.50199	9.67978	9.30057	8.16562
LE01Gene01316	5.37489	4.94017	4.99706	5.57006	5.36218	6.25268	5.63016	5.69953	6.52513	4.04717	4.34147	4.65594	4.30119	5.59561	5.25493	4.40155	5.62492	5.38321
LE01Gene01317	9.03547	9.23062	9.41656	9.25932	9.7111	9.39959	10.003	10.5018	9.85233	9.22167	9.15611	9.26049	10.3981	10.6478	10.5829	10.316	10.5629	10.4775
LE01Gene01318	8.23203	8.96069	8.52227	8.7374	8.20907	8.54106	8.26079	7.96344	8.13467	8.97126	8.63319	8.76074	8.11882	8.39798	7.95342	7.83151	7.90398	8.34825
LE01Gene01319	7.82002	7.40616	7.77718	9.99875	9.66208	9.90434	10.646	9.85276	10.2621	7.40035	7.84161	7.2509	9.38812	9.26144	9.57609	9.26346	9.5401	9.61273
LE01Gene01320	10.6227	10.3561	10.3656	10.1703	10.2992	10.1707	10.4245	10.0109	10.4513	10.3136	10.3885	10.5263	10.6541	10.2591	10.5133	10.2821	10.343	10.6604
LE01Gene01321	4.71135	5.43146	4.56963	4.04459	4.90363	5.17967	5.55769	3.75294	4.55421	3.86694	3.65118	5.18216	4.07958	4.70749	4.50406	5.21065	4.34619	3.99125
LE01Gene01322	6.32538	6.12889	5.93192	5.47269	6.60184	6.08061	6.20538	6.46552	6.79727	5.54302	6.63359	6.79383	5.71329	5.67962	7.01214	5.43926	5.7162	5.45031
LE01Gene01323	6.18967	6.34833	5.51041	4.21484	4.65911	5.54603	4.91248	5.83713	5.45082	5.60188	6.40661	6.18233	5.19211	5.37818	5.08972	3.0735	3.79626	4.23909
LE01Gene01324	11.5172	11.9812	11.7729	11.2913	11.3898	11.5939	11.7299	11.7663	11.9541	11.6723	12.0069	11.5796	11.4238	11.696	11.163	11.8485	11.3007	11.2159
LE01Gene01325	5.82767	6.12889	5.64766	5.09049	5.76017	4.63305	4.43457	3.04981	5.62532	5.51267	5.43962	5.94311	5.11629	4.47649	3.21153	0	3.55385	3.69183
LE01Gene01326	9.00799	9.22832	8.85267	8.88346	9.06801	8.99068	8.88548	9.13082	8.79848	8.7933	8.75726	8.56329	8.30534	7.96217	8.58188	8.51391	7.99793	7.97939
LE01Gene01327	11.1147	10.6889	11.1129	11.5069	11.422	11.5144	11.5248	11.594	11.4444	10.4022	10.4983	10.5862	11.4985	11.1424	11.4304	11.5344	10.9427	11.1811
LE01Gene01331	11.9383	11.4914	11.6618	11.7423	11.5045	11.7465	11.2212	11.2179	11.316	11.2257	11.7897	10.9998	10.9824	11.8774	11.0877	10.8065	12.4158	11.0047
LE01Gene01332	12.0589	12.004	11.7911	11.5607	11.4512	11.399	11.2652	11.3282	11.6077	12.3169	12.3952	11.9657	11.4621	11.8103	11.4185	11.4527	11.9141	11.5878
LE01Gene01333	6.54982	6.62531	6.24046	12.6511	11.8615	12.8698	15.3906	13.8981	14.2131	7.03429	6.37346	6.56704	8.20826	7.83361	6.40372	7.79067	8.67691	14.8954
LE01Gene01334	10.8633	10.5557	10.4913	10.5779	10.7118	10.6881	11.2307	10.8332	10.7647	10.459	10.5877	10.7948	10.342	10.488	10.3596	10.8107	10.1244	10.6327
LE01Gene01335	8.67792	9.01513	8.9829	9.26902	9.05287	9.31797	8.93281	8.51606	9.26199	9.0098	8.77957	8.73365	8.60137	8.91085	8.88267	8.52641	8.69946	9.14043
LE01Gene01336	10.4216	10.4069	10.4941	10.8677	10.719	10.8064	10.7257	10.6075	10.5607	10.4053	10.2181	10.5575	10.8599	10.9331	10.9354	10.5885	10.4422	10.8314
LE01Gene01337	12.4319	12.0927	12.0349	11.6599	11.6164	11.4685	11.0892	11.4323	11.0846	12.4768	12.67	12.6614	12.0306	11.5627	12.0914	12.3528	11.7182	11.5859
LE01Gene01338	11.0334	11.1063	10.6027	9.59627	9.51341	9.4278	8.58634	8.95451	8.72369	11.491	11.5174	11.1819	9.10401	8.57659	9.29931	9.24595	9.03701	8.32161
LE01Gene01339	15.8896	15.9319	15.7099	15.7584	15.5263	15.7188	15.3286	14.6436	15.4826	15.0984	15.0703	15.232	15.9067	15.0531	14.914	15.1151	15.0986	15.1582
LE01Gene01340	9.72606	9.84816	10.1756	13.2058	11.6793	13.0977	14.0597	11.0589	13.5405	8.33232	8.82626	9.64192	12.821	13.8035	11.3899	14.1679	14.5174	12.9767
LE01Gene01341	13.02	13.4371	13.2465	12.6911	12.8211	12.5342	11.9753	12.3843	12.2067	12.6844	12.3623	12.1195	12.2131	11.7061	11.3709	12.0302	12.2133	11.5924
LE01Gene01342	13.1671	13.3516	13.3226	12.4261	12.8003	12.4431	12.2249	12.7387	12.3001	13.2234	13.1746	12.9738	12.5795	12.6573	12.6082	12.4819	12.6774	12.3985
LE01Gene01343	11.9153	11.6559	11.8015	10.9893	11.0934	10.9516	10.9144	11.044	11.128	11.8801	11.844	11.775	11.1076	11.2199	11.3737	11.3101	11.236	11.0507
LE01Gene01344	10.6942	10.4947	10.7464	10.8256	10.767	10.7762	10.6838	11.0182	10.8339	10.506	10.3281	10.5094	10.7513	10.3215	10.6475	10.6789	10.0735	10.7704
LE01Gene01345	7.26663	7.58237	7.70353	10.7982	9.71911	9.77071	10.4783	9.57241	9.98793	6.55752	8.01285	7.52031	9.18045	9.42046	7.98317	10.3064	9.34654	8.81723
LE01Gene01346	10.9926	9.9949	8.9803	11.1243	9.77704	10.1838	11.004	9.86569	10.9483	7.99624	8.4265	8.20236	9.88011	9.31496	8.98327	11.1477	10.0663	9.95357
LE01Gene01347	10.2456	9.81632	10.6711	11.2913	11.6168	11.3888	11.7979	11.774	11.8902	9.17155	9.51078	9.16484	10.9743	11.3984	10.9588	11.8785	11.5161	11.3781
LE01Gene01348	11.4548	11.3208	11.0198	10.6958	10.9839	10.7722	10.6351	10.7761	10.6165	11.4739	11.5732	11.6846	11.2689	10.7702	11.3023	11.2679	10.5761	10.8649
LE01Gene01349	11.3312	11.8364	11.9798	11.8744	12.1062	11.8435	11.8646	11.9248	11.8673	11.5146	11.4213	11.2962	11.5642	11.5353	11.4603	11.6013	11.9564	11.6173
LE01Gene01350	11.317	11.5571	11.2164	10.7164	10.9138	10.6243	10.9216	11.0066	10.7869	11.4022	11.1444	11.2208	10.343	10.4416	10.7147	10.6257	10.6023	10.5672
LE01Gene01351	10.4737	10.3884	10.4813	9.04178	9.5299	9.0385	8.40718	9.19111	8.92404	11.5351	12.1478	11.646	10.1557	11.9787	10.3877	9.36897	11.5772	9.93758
LE01Gene01352	10.4571	10.322	9.59349	11.0678	10.8356	11.0074	11.1938	10.8912	11.2001	9.91285	9.85351	9.5556	10.7164	10.7702	10.185	10.643	11.0275	11.1499
LE01Gene01353	11.1059	10.5585	13.0492	17.1674	15.5462	16.3869	16.674	13.7605	17.1626	8.6715	8.94102	8.24616	13.1497	13.8196	10.6878	16.504	15.8517	15.4096
LE01Gene01354	8.78186	9.02047	9.88898	11.3008	10.4033	11.0998	11.4691	10.4088	10.959	9.22167	9.77951	8.98984	9.21493	10.4456	8.18611	9.40098	10.1506	9.76217
LE01Gene01355	10.2878	10.3561	10.513	10.8007	10.7823	11.0733	10.9843	10.6228	10.8033	12.3866	14.199	12.9392	12.6949	14.8217	12.4503	12.0375	14.4082	13.8523
LE01Gene01356	7.33255	7.56057	7.50827	8.31883	7.84919	8.33945	8.6832	8.42294	8.37844	7.7647	8.59775	8.53611	8.92949	10.6973	9.93694	9.16303	10.7491	9.63993
LE01Gene01357	14.2443	14.5693	14.9179	14.2193	13.5991	14.2696	13.5507	12.5571	14.1746	14.4158	14.4142	15.1932	14.8924	14.653	15.6358	15.1009	14.7349	14.0804
LE01Gene01358	9.69507	10.3306	9.92453	7.79549	8.51538	8.00158	8.04582	9.90378	7.82695	10.6437	10.6075	10.3535	8.90998	9.22696	8.79145	8.21269	8.94251	7.71181
LE01Gene01359	12.3317	12.132	11.9749	12.3407	12.1385	12.101	12.0477	11.9949	12.1998	12.1571	12.1502	12.1505	12.052	12.4217	12.5864	12.9304	12.6889	12.701
LE01Gene01360	10.7904	11.3466	11.4063	12.2023	11.9615	11.8224	12.1506	11.6604	12.3033	12.0303	12.1193	12.2366	12.304	12.8389	12.4029	12.6231	13.3376	12.8876
LE01Gene01361	8.11982	8.31343	8.52939	8.89604	9.1697	9.22688	8.72102	8.86079	9.20814	7.31497	6.53209	6.61236	8.45132	8.48616	7.60872	7.78374	8.66551	8.10444
LE01Gene01362	0	3.75006	3.57509	4.04459	4.29763	2.93881	3.24676	2.63244	3.85761	3.86694	3.12252	0	7.39657	3.27768	3.04097	2.87939	3.26231	2.79936
LE01Gene01363	5.31092	4.58458	5.22474	6.6764	6.90121	7.73753	6.75169	6.51558	7.23442	4.20737	6.53209	7.00117	9.98107	5.37818	4.74539	5.03527	5.45864	6.71867
LE01Gene01364	11.7343	11.4846	11.8417	13.0912	12.9924	12.9756	13.0063	13.0734	12.8923	11.2954	11.2549	11.849	13.3519	12.431	12.5174	12.2732	12.5588	12.6336
LE01Gene01365	11.5741	10.8924	10.9821	12.7881	11.3067	11.1742	14.3369	13.0472	13.0649	10.0125	11.1814	10.7515	10.4317	10.4812	10.4635	10.4663	10.5629	14.5694
LE01Gene01366	9.85222	9.52512	10.1992	12.0963	11.7522	12.0511	12.4367	11.9077	12.2894	9.3581	9.39991	9.31406	11.5262	11.625	11.582	11.8568	11.4687	12.0778
LE01Gene01367	14.2946	14.2753	13.2833	12.7605	12.742	11.6989	13.6072	12.7483	11.1849	14.7651	13.5132	11.6305	7.95982	7.67891	6.77421	6.66781	7.87125	10.3916
LE01Gene01368	10.6729	10.616	10.6287	10.1243	10.4083	10.5647	10.4027	10.652	10.4663	10.727	10.5567	10.8565	10.6193	10.4466	10.7695	10.6826	10.0821	10.1531
LE01Gene01369	10.5605	10.1659	10.5085	10.3037	10.8104	10.6208	10.354	11.0631	10.8524	10.0865	10.6444	10.4893	10.5445	11.1394	10.874	11.0907	10.8246	11.0378
LE01Gene01370	10.2317	10.0389	10.0098	9.93773	9.96525	9.9271	10.0648	9.78804	9.89556	9.87755	9.83688	9.5881	9.65247	9.07238	9.69233	9.86004	9.35839	9.54335
LE01Gene01371	9.91811	8.72951	9.82529	12.096	11.3288	11.8602	11.7855	11.0603	11.5488	8.74516	8.66094	9.15211	11.4135	10.6855	9.96256	11.1046	10.7741	11.5024
LE01Gene01372	13.582	12.9783	11.8736	12.8297	12.5015	11.5205	13.9102	12.7166	11.0015	14.3435	12.8621	11.0329	8.94327	9.28399	7.84093	9.21798	8.95818	9.4542
LE01Gene01373	9.37944	10.2936	9.68084	9.93925	9.65708	9.44958	9.7683	10.0109	9.96214	9.78692	9.51269	9.31406	9.51347	9.16029	9.68148	9.66479	9.74184	9.89907
LE01Gene01374	11.8458	11.7715	11.65	11.997	12.0949	12.1411	12.9705	12.438	12.6351	12.4011	12.6747	12.5592	13.3065	13.5562	12.8749	13.081	13.0272	12.7539
LE01Gene01375	2.4593	2.53365	1.899	4.3671	5.15105	7.26121	5.63016	5.61019	3.7411	1.55654	2.54057	1.59336	7.38046	2.957	3.21153	2.38927	3.09099	4.45052
LE01Gene01376	9.05268	9.58933	9.46566	9.74963	9.50787	9.70307	9.76428	9.79481	9.87842	9.27237	9.01006	8.9104	9.03363	9.16273	8.99792	8.8216	9.38414	9.45625
LE01Gene01377	10.7237	11.3035	11.1387	10.3213	10.3162	10.2563	10.5146	10.4997	10.2083	11.1562	10.5832	10.6319	9.99304	10.2828	9.87163	9.84183	10.343	10.2703
LE01Gene01378	10.0816	10.6186	10.3253	10.7401	10.538	10.6199	10.6017	10.6161	10.6812	10.0852	9.65399	9.77909	9.96765	10.1663	10.1408	9.89739	10.5065	10.598
LE01Gene01379	9.20564	9.42613	9.65503	10.799	10.6604	10.7429	10.8655	10.5152	10.9227	10.067	11.5254	11.6397	12.6974	14.5275	14.8106	12.3286	14.6593	13.7573
LE01Gene01380	11.9387	11.8372	12.2259	10.5963	10.8111	11.004	10.2587	10.4841	10.6482	12.1599	12.3491	11.9859	11.8893	11.5502	11.4004	11.2673	11.2146	10.4623
LE01Gene01381	13.9924	13.8809	14.3569	12.813	13.5883	13.2571	13.2509	13.8027	13.4125	13.12	12.7176	12.4597	12.1264	13.5252	13.2058	13.5509	14.0708	13.1551
LE01Gene01382	9.48104	9.5176	9.50412	9.62488	9.493	9.70307	10.0047	9.55855	9.99112	9.64546	9.93955	9.77578	9.99039	10.0541	9.4518	9.48018	9.46751	9.7186
LE01Gene01383	9.48648	9.73593	9.65503	9.98998	9.79382	9.80798	9.79218	9.58223	9.62873	9.238	9.11658	9.31177	9.91409	9.57835	9.33897	9.21798	9.36546	9.77858
LE01Gene01384	10.236	9.90837	10.1699	10.711	9.95579	10.6243	11.2278	9.73091	11.1863	7.91153	9.43649	9.04322	10.1885	10.9072	9.2561	10.2845	11.5313	11.3288
LE01Gene01385	10.3237	10.1683	10.0549	9.87719	9.63355	9.97977	9.74605	10.034	9.5158	9.26556	9.55581	9.34795	9.06673	8.39384	9.02391	8.59523	8.3653	9.68067
LE01Gene01386	10.0154	10.4271	10.6509	10.7217	10.7444	10.2142	10.4905	11.0276	10.3025	6.99091	6.48631	6.20223	7.10451	7.46673	5.17469	6.08242	7.1796	7.1506
LE01Gene01387	11.6914	11.4225	11.6974	11.2978	11.5119	11.249	11.1498	11.6427	11.0015	11.7508	11.7695	12.1185	11.6368	11.5819	11.6438	11.5685	11.6441	11.5206
LE01Gene01388	11.6358	11.3143	11.8985	13.1302	12.6307	13.0686	12.9894	12.4643	12.8359	11.1532	11.1027	11.7384	13.0178	12.4909	12.8114	12.4031	12.0844	13.1529
LE01Gene01389	9.82957	9.6508	9.72494	10.2385	10.0553	9.99735	10.2658	10.448	10.3102	9.24494	9.48385	9.33223	10.3073	10.2199	10.1394	10.1737	10.2846	10.0432
LE01Gene01390	13.2769	13.5896	13.4037	12.0909	12.8069	12.173	11.7139	13.1718	12.1475	13.8915	13.1318	13.1669	11.7796	12.0252	12.1984	11.7307	11.8725	11.765
LE01Gene01391	10.7427	10.7853	11.2241	10.9186	10.6343	11.2285	10.9834	10.892	11.9813	11.1333	11.1426	11.3925	11.1977	12.4255	11.8049	12.1216	12.4804	11.5648
LE01Gene01392	11.648	11.6568	11.587	11.5151	11.476	11.5219	11.5437	11.5279	11.538	11.4278	11.5083	11.4086	11.2776	11.2506	11.0966	11.376	11.4265	11.6963
LE01Gene01393	10.6713	10.7221	10.4534	10.1055	10.5326	10.3435	9.92595	10.7932	10.0289	10.5506	10.54	10.406	9.96765	9.66849	9.94452	9.86168	9.7634	10.7023
LE01Gene01394	9.62938	9.26473	9.25838	9.90544	9.73499	9.80029	9.85022	9.71671	10.0258	8.93738	9.58326	10.2342	9.4855	9.49192	9.82146	9.48872	9.33218	9.96365
LE01Gene01395	11.1866	11.7954	11.5026	13.4374	12.7492	13.1974	13.9537	12.7307	13.9133	11.1599	10.6973	11.0048	12.234	12.856	12.1013	12.4917	13.3532	12.8387
LE01Gene01396	9.21877	8.86907	9.62209	11.7647	12.0556	11.932	12.3279	12.3041	12.576	8.73204	9.02615	9.17998	11.4929	11.714	11.3675	12.3215	11.9012	12.1064
LE01Gene01397	9.12655	8.99631	9.1166	10.1959	10.4722	10.5501	11.1068	10.5852	11.6866	8.57198	8.38135	9.0867	10.1234	10.1712	9.87322	10.7719	10.9181	10.7753
LE01Gene01398	9.61455	9.20274	9.206	10.0698	10.0194	10.2764	10.3687	10.2014	10.2831	9.71042	9.84899	10.3767	10.5615	10.3958	10.7941	10.4824	10.4588	10.4654
LE01Gene01399	11.9294	11.4574	11.399	11.1671	10.9366	11.1466	11.3615	10.9516	11.2396	11.7262	12.0049	12.1677	11.9349	11.4699	11.6797	11.6714	11.139	11.4715
LE01Gene01400	8.43322	8.79632	8.93275	9.89921	9.7111	9.49409	10.3325	9.81328	10.0867	9.11205	8.62265	8.31175	9.64237	9.41843	9.14993	9.78923	10.3877	9.89305
LE01Gene01401	8.36791	8.27379	8.02407	9.16377	9.22924	9.3457	9.18517	8.76746	9.19436	7.46519	7.27782	7.77407	8.74359	8.63035	8.57016	8.66845	8.9488	8.82358
LE01Gene01402	9.6473	9.48518	9.92183	11.3195	11.2679	11.503	12.2267	11.3311	12.2029	9.60287	9.09386	9.36129	11.1954	11.6009	11.1101	11.6502	11.8445	11.7006
LE01Gene01403	9.10785	9.21675	9.33151	10.6126	10.2734	10.4835	10.5206	10.1228	10.397	8.77743	8.93819	9.16231	10.5615	10.2011	10.0952	10.0766	10.1424	11.0913
LE01Gene01404	10.1403	9.70976	9.98924	12.0291	11.2447	11.8277	11.9244	11.2423	11.8029	10.2075	10.0288	10.605	11.6436	11.5414	11.6075	11.4357	11.5506	11.8494
LE01Gene01405	8.11515	7.97736	7.63914	9.27144	8.37237	9.32227	10.5582	8.90215	10.1904	7.25205	7.94677	7.06777	8.67258	9.35384	8.82798	9.76484	9.54218	12.5108
LE01Gene01406	8.57614	8.51957	8.58514	10.603	10.3162	10.6103	11.2941	10.5556	11.291	7.92887	7.30445	8.69554	10.1246	10.8433	10.163	11.1571	11.6354	10.8116
LE01Gene01407	4.66092	3.64349	4.26281	6.78854	6.84376	8.23386	9.10161	6.7705	8.76157	3.95987	3.7578	3.5965	9.35139	11.7293	8.02954	10.7374	10.9945	8.13536
LE01Gene01408	11.9052	11.8024	11.7414	11.5115	11.8389	11.6181	11.8763	12.2068	11.9294	11.8486	11.9026	12.0753	11.7347	12.0478	12.1212	12.241	12.1119	12.1521
LE01Gene01409	9.13812	9.29585	9.48593	9.664	8.95859	9.45938	9.17914	8.83802	9.05183	9.58839	9.4993	9.49638	9.41803	8.76464	9.21406	9.43451	8.90744	9.40431
LE01Gene01410	11.3462	11.5218	11.4976	11.349	11.1905	11.1539	10.8776	11.0603	10.7487	11.4958	11.3047	11.3418	11.5018	11.2546	11.0495	10.6023	10.884	11.1245
LE01Gene01411	8.34813	8.75212	8.76788	11.5876	8.62175	7.96355	13.2224	11.3153	11.1723	7.75825	8.38551	8.32542	6.92729	6.92843	7.01214	6.31143	6.626	12.9945
LE01Gene01412	9.53629	9.92978	9.67924	9.79733	9.70304	9.62168	9.94915	9.9741	10.1581	10.1642	9.71646	9.59188	8.90436	9.33669	9.35727	9.52445	10.0208	9.67543
LE01Gene01413	6.94704	6.85758	7.89215	9.53328	8.30159	8.95513	8.51158	7.38736	8.96358	6.52747	7.24153	6.48817	8.91279	8.79635	8.3412	10.1212	8.87479	9.01582
LE01Gene01414	11.5079	10.8844	11.2152	11.2155	11.5777	11.2302	11.102	11.9588	11.5182	10.8081	10.9724	11.0377	11.6287	11.4331	11.7648	12.0025	11.5386	11.1903
LE01Gene01415	11.5754	11.5171	11.8018	11.2293	11.9561	11.448	12.0382	12.2148	11.8599	10.0631	10.1838	10.6032	12.0757	12.4824	11.7319	12.2558	12.8748	11.9601
LE01Gene01416	11.117	10.6168	10.8854	10.5602	10.7254	10.7292	11.202	11.0469	10.7144	11.1685	10.9381	11.1812	11.8736	12.0342	11.6085	11.328	11.6614	11.4211
LE01Gene01417	9.96693	9.88517	9.40305	9.38952	9.35794	9.32656	9.08237	9.70956	9.1579	9.38976	9.54096	9.77245	9.6575	9.36445	9.39095	9.62662	9.60523	9.6109
LE01Gene01418	10.7904	10.5147	10.836	10.9415	10.8641	10.9523	11.0159	11.2336	10.9302	10.885	10.9102	11.0287	11.1462	11.06	11.3292	11.143	10.759	10.911
LE01Gene01419	11.146	11.3127	11.3405	11.1819	11.2002	11.0733	11.5141	11.4088	11.2845	11.2954	11.0623	11.1373	11.1722	11.1681	11.5082	11.5344	11.455	11.3564
LE01Gene01420	9.75038	9.7978	9.79163	9.66951	9.93805	10.0631	10.2573	9.97708	10.1778	9.87904	9.72798	10.2366	10.0904	10.3171	10.4927	10.5614	10.0058	9.97224
LE01Gene01421	10.9836	11.0124	11.2721	10.8346	10.8806	10.6705	10.952	10.6724	10.8106	10.9892	10.7015	10.9134	10.7853	10.8242	10.6213	10.7499	10.8889	10.4825
LE01Gene01422	8.80527	7.97736	8.43393	11.1068	10.6377	11.0796	11.0444	10.5536	10.8991	8.05007	7.9524	8.79391	10.6381	10.5006	10.6797	10.419	10.4163	10.9266
LE01Gene01423	10.0744	10.0981	9.95659	11.014	10.6216	10.9257	10.6933	10.0397	10.3825	9.16424	8.82626	9.35464	10.2035	9.9856	10.1913	9.97387	9.8516	10.4501
LE01Gene01424	15.6494	15.8522	15.4323	14.769	15.0993	14.879	15.1106	15.266	15.2597	15.8264	15.5646	15.5375	14.2577	14.5652	14.2322	14.4611	15.0946	14.7553
LE01Gene01425	9.71375	9.98265	10.0072	10.4462	10.187	10.353	10.0875	10.2783	9.99272	9.95296	9.82926	10.0069	9.85701	9.69059	9.96554	9.65344	9.8782	10.0874
LE01Gene01426	9.52046	10.0402	9.77224	8.92086	8.96938	9.1049	8.57262	9.21908	9.02716	9.98786	9.65915	9.61804	9.05916	8.96766	9.18363	9.21798	9.02516	8.83304
LE01Gene01427	7.22385	7.70004	8.04907	9.07809	8.45143	8.90441	9.57072	9.03109	8.97974	9.64895	9.65399	9.15976	8.93502	9.37919	8.4978	9.08635	9.35603	9.70664
LE01Gene01428	12.9954	13.6881	13.4523	14.002	13.68	13.7512	14.3216	13.6968	13.9308	13.6323	13.4556	13.2325	13.4353	13.7175	13.1126	12.6058	13.4719	13.0304
LE01Gene01429	15.3257	15.8122	15.22	14.4512	14.584	14.3553	14.2281	14.4159	14.2515	15.5642	15.3909	15.2463	14.153	14.1453	14.191	14.326	14.553	14.5186
LE01Gene01430	10.9073	10.5758	11.1778	11.1794	11.3439	11.2984	11.2473	11.4225	11.0015	10.5318	10.4867	10.3778	11.3667	11.135	11.0333	11.0773	10.6162	11.0966
LE01Gene01431	10.8387	10.8946	10.9339	12.4436	12.2271	12.3697	12.2738	12.044	12.011	10.4992	9.83384	9.93292	11.499	11.2414	10.5761	10.6919	10.8938	11.8764
LE01Gene01432	11.7221	11.346	11.3839	10.8788	10.9332	11	10.6901	10.8825	10.7951	11.8046	12.149	12.2027	11.5203	11.4822	11.9633	11.9563	11.3532	10.9521
LE01Gene01433	10.2317	10.2213	9.9353	9.7617	10.194	10.1197	9.91692	10.2904	10.2896	10.7426	11.3216	11.1296	11.454	11.8892	11.7661	11.858	11.9297	11.2427
LE01Gene01434	16.0556	16.0631	15.879	15.4152	15.3489	15.4237	15.0518	15.1944	15.0816	16.3175	16.1826	16.0896	15.4172	14.9521	15.0828	14.9056	14.762	15.3132
LE01Gene01435	15.1529	15.291	14.9233	13.69	13.9249	13.7461	13.4804	13.6102	13.5319	15.4499	15.342	15.2877	13.8111	13.7715	13.8161	13.904	13.8576	13.5119
LE01Gene01436	9.25322	9.50053	9.64522	10.1041	9.89345	9.89715	9.60933	9.81661	9.93753	9.24031	9.17547	8.42617	9.50606	9.90354	9.61842	9.96472	10.212	9.81722
LE01Gene01437	12.681	12.6835	12.9719	11.6576	12.0135	11.6654	11.5922	12.0139	11.6788	13.4288	13.3674	13.3637	12.1491	12.3883	12.222	12.2651	12.2756	11.6218
LE01Gene01438	10.6848	10.2814	10.7533	12.2268	12.0323	12.2279	12.1108	11.7637	11.9496	10.3602	10.6788	10.7783	12.4189	11.8076	11.7785	11.7975	11.4073	12.1341
LE01Gene01439	13.1552	13.0316	13.0157	11.99	12.422	12.1548	12.335	12.3127	12.2503	12.6887	12.7743	12.5134	12.2626	12.1889	11.9178	12.0126	12.0242	12.0814
LE01Gene01440	9.60124	9.02843	9.12132	10.0176	9.91732	10.0797	9.82536	9.70956	9.78771	9.12966	8.7764	8.66001	10.0916	9.70068	9.50404	9.64009	9.04584	10.2135
LE01Gene01441	10.6989	10.4628	10.5247	10.8256	10.9839	10.8906	10.9756	10.9163	10.7008	10.2146	10.2389	10.6419	11.0206	10.8211	11.2229	10.7876	10.7173	11.265
LE01Gene01442	11.2224	12.2193	11.9258	11.6126	11.9945	11.5381	11.2969	11.7864	11.3431	11.7629	11.0066	11.2852	10.5254	10.671	10.5594	10.7962	11.4254	11.6846
LE01Gene01443	12.3407	12.708	12.5408	12.7366	12.5059	12.6469	13.2431	12.6046	13.3471	12.4895	12.2589	12.4503	12.5534	12.7575	12.7541	12.8726	13.0785	12.9302
LE01Gene01444	11.1732	11.7343	11.4092	11.9495	11.5865	11.6433	11.8897	11.3759	11.8223	11.1513	10.6453	10.6227	11.0374	10.8342	10.7941	11.0137	11.0943	11.7135
LE01Gene01445	9.62281	10.234	10.315	10.1	9.73815	9.89571	9.379	9.38762	9.36647	9.79483	9.65399	9.63095	9.33267	9.46652	9.14204	8.8317	9.77229	9.85176
LE01Gene01446	11.9577	11.6447	11.9739	11.479	11.4863	11.4327	11.4278	11.3399	11.4438	11.6637	11.9335	11.6951	12.1142	11.9377	11.597	11.615	11.4389	11.6435
LE01Gene01447	5.43614	5.58332	5.25942	6.11291	5.32907	5.73849	6.05555	5.91381	6.2115	4.04717	5.94741	4.91905	5.88302	4.70749	6.09042	4.83557	5.80205	5.27631
LE01Gene01448	8.53473	8.22842	8.98549	10.5232	10.0155	10.2188	10.605	10.4044	10.5988	8.17647	8.23676	7.39621	10.1076	9.76779	9.78476	10.1856	9.86496	10.0019
LE01Gene01449	11.3037	11.5019	11.587	10.7915	10.8444	10.8702	11.0294	11.162	10.8777	11.527	11.3047	11.1585	10.9126	11.2408	10.9031	11.4494	11.4572	10.9463
LE01Gene01450	9.00799	9.50434	9.5764	7.88651	8.01452	8.13466	6.68521	7.07873	6.23323	9.10952	9.13401	8.5824	7.86456	7.95095	7.62391	7.30232	7.53758	7.75226
LE01Gene01451	10.3842	10.298	9.82385	9.06144	9.0805	9.29409	9.06939	9.28791	9.06401	10.465	10.5474	10.4198	9.33057	9.11826	9.80656	9.6208	9.18815	9.42739
LE01Gene01452	9.01303	9.48325	9.71872	9.81895	9.7127	9.97977	10.0939	9.8785	9.93587	9.53841	9.42237	9.13668	9.82908	10.1081	9.79486	9.72925	10.2041	9.86873
LE01Gene01453	11.5194	11.2021	11.302	11.0298	10.8948	10.8473	10.7805	10.852	10.8115	11.8505	11.8909	12.1531	11.4948	11.3953	12.0705	11.7198	11.2353	11.4295
LE01Gene01454	8.48849	8.66967	8.83553	9.36032	9.33101	9.40366	9.52869	9.39655	9.31645	8.69535	8.26866	7.93139	8.47428	8.60193	8.2945	8.21269	8.87479	8.63093
LE01Gene01455	13.4299	13.0968	13.0925	13.7559	13.4427	13.6755	13.9961	13.0122	14.0783	13.1493	13.4727	13.4693	14.1624	13.9434	13.6422	13.7396	13.6897	13.9272
LE01Gene01456	10.0935	9.92978	9.86666	10.8859	10.5861	10.7453	10.9306	10.8873	11.0808	9.65417	9.79681	10.2245	10.8379	10.8126	11.0856	11.1618	10.8382	10.9893
LE01Gene01457	11.7438	11.7076	11.6739	11.3834	11.3923	11.5418	11.1398	11.2286	11.1994	11.3871	11.5235	11.5302	11.5929	11.2528	11.1533	11.0865	10.9252	11.1891
LE01Gene01458	11.2789	11.1459	11.4116	11.6409	12.0342	11.7055	11.4176	12.2024	11.5682	11.2397	11.6252	11.9481	11.7477	11.5942	11.6303	11.4609	11.3609	11.2604
LE01Gene01459	9.79491	9.72127	9.72649	10.0754	9.89769	9.91006	10.025	9.96512	10.018	9.67831	9.53722	9.85334	10.0978	10.0115	10.3482	10.3748	10.1341	10.241
LE01Gene01460	11.2757	11.2736	11.1687	9.89295	10.2971	10.0424	9.87093	9.95608	9.83289	10.9607	11.038	10.7156	10.2103	10.4204	10.4709	10.0291	10.325	9.73887
LE01Gene01461	6.89345	6.88123	6.4945	5.36827	5.26047	5.48597	3.42028	4.44645	0	7.33246	7.0865	6.3162	4.23104	3.65504	5.47192	3.24456	0	0
LE01Gene01462	11.0433	11.011	10.8588	8.83857	9.07302	8.43784	7.32128	7.90829	8.12889	11.1519	11.1184	10.6627	8.15716	6.55118	7.10166	7.56706	6.67233	6.05689
LE01Gene01463	10.7152	11.027	10.659	9.42465	9.63693	9.66634	9.25844	9.69334	9.24605	10.5636	10.4019	10.2012	9.4121	9.00613	9.24877	9.34566	9.18549	8.9332
LE01Gene01464	10.1449	10.2925	10.1259	9.5453	9.67367	9.3729	9.2208	9.85276	9.41956	10.5384	10.3227	10.0907	9.53182	9.73544	10.069	10.0069	9.92679	9.59245
LE01Gene01465	10.8591	10.4842	10.6623	10.7574	10.4684	10.7162	10.6129	10.511	10.7288	10.8268	10.7402	11.046	11.2097	10.6939	11.3843	10.7979	10.4731	10.8362
LE01Gene01466	13.0091	12.9117	12.7943	12.0977	12.2372	12.3054	12.1739	12.0366	12.3642	13.3392	13.4338	13.6491	13.0663	13.4227	13.629	13.3325	13.6243	12.7586
LE01Gene01467	11.2763	11.7134	11.0835	10.0932	9.85616	9.82928	10.2093	9.97111	10.2014	11.5603	11.3895	11.3756	10.2318	10.3896	11.0389	10.261	10.8708	10.1543
LE01Gene01468	11.9363	12.1246	12.4267	12.3384	12.5393	12.3535	12.2143	12.5262	12.1769	12.0813	11.7164	11.5705	11.6925	11.2945	11.7301	11.5188	11.5028	11.8483
LE01Gene01469	9.09603	9.51382	9.43374	8.87713	8.65887	8.53736	8.78193	8.86402	8.13467	9.59202	9.22045	9.15722	8.79919	8.10068	8.4346	8.68711	8.06313	7.78512
LE01Gene01470	10.9926	11.1784	10.9638	10.4028	10.6292	10.4816	10.4447	10.8373	10.5093	11.0029	10.9445	10.9021	10.3626	10.4476	10.6373	10.7401	10.3923	10.3614
LE01Gene01471	12.0318	11.9004	11.7601	11.1922	11.346	11.014	11.3879	11.4143	11.2936	11.9175	12.0383	12.0515	11.3104	11.1325	11.6554	11.358	11.2048	10.8275
LE01Gene01472	8.65877	8.62135	9.04137	9.03042	8.93678	9.05926	9.21492	9.0482	8.8765	9.22635	9.32819	9.39627	9.29233	9.28175	9.72086	9.46295	9.39339	9.65956
LE01Gene01473	10.6665	10.9169	10.8673	11.135	11.3225	11.0998	10.98	11.4603	10.8471	10.4268	10.5686	10.4367	11.0257	10.5479	10.8008	10.7011	10.6628	11.0206
LE01Gene01474	9.63593	9.28481	9.17681	8.49859	8.60456	8.65794	8.11058	8.90841	8.37844	9.28814	9.17307	9.32317	8.13331	7.65835	8.3366	8.40085	7.37901	7.67019
LE01Gene01475	11.131	10.9219	11.2152	11.7358	11.4736	11.8182	11.6219	11.3241	11.3679	10.9515	10.8942	10.3833	11.6823	11.1461	10.9347	11.3627	10.566	11.5486
LE01Gene01476	9.93147	10.2283	10.2475	9.67316	9.60789	9.73406	9.64255	9.88168	9.7748	10.1968	9.9869	10.0624	9.70679	9.55259	9.8953	9.61886	9.5546	9.64889
LE01Gene01477	11.4361	10.9396	11.3888	12.2829	12.0499	12.159	12.0278	11.8889	11.9368	10.5992	10.6864	10.6291	12.1399	11.4481	11.4245	11.4603	11.0186	11.9343
LE01Gene01478	12.604	12.2641	13.3328	12.7079	12.1584	13.2804	12.3018	11.5441	12.1748	11.8489	12.4096	11.4204	13.1531	13.3349	11.6991	11.5204	12.4753	13.1109
LE01Gene01479	11.5919	11.5911	11.8299	12.0795	11.475	11.5841	12.432	11.1666	12.3875	11.6243	11.6783	12.2504	11.9386	11.9057	12.8393	12.548	12.2574	12.338
LE01Gene01480	13.5056	13.7978	14.0078	13.0794	12.5167	13.372	11.9861	10.9022	12.3192	13.3688	13.7036	12.8242	12.9469	13.5044	11.1	11.1362	12.7516	13.0984
LE01Gene01481	5.06163	4.94017	5.11539	6.78854	6.22363	6.86118	7.33218	6.22594	6.89594	5.31577	4.59259	6.22186	6.4288	6.4591	7.25587	5.96496	6.36902	7.32164
LE01Gene01482	7.88188	8.36884	8.58855	10.4811	10.1063	10.3082	10.477	9.96211	10.0672	8.68858	8.07604	8.48015	10.2825	10.0329	9.83946	9.28323	9.77583	10.6876
LE01Gene01483	12.1301	12.0822	12.1641	12.1011	12.1044	12.1408	12.4909	12.1302	12.6333	12.2475	12.2063	12.4349	12.1571	12.235	12.2091	12.2171	12.0876	12.0785
LE01Gene01484	10.857	11.1956	10.9795	11.0892	11.1196	11.0948	10.7854	10.8833	11.1171	10.8074	10.991	10.7882	10.6474	11.0229	10.7541	10.6601	10.9884	10.8085
LE01Gene01485	6.24207	5.86997	6.07508	6.29483	6.7215	7.23409	6.96284	5.81064	6.25464	4.71365	5.19592	5.89501	6.01412	6.62367	6.38601	5.8896	6.52863	6.36582
LE01Gene01486	10.9446	11.2613	10.9129	9.81067	9.98132	9.81257	9.97198	10.0624	9.64908	11.1145	10.8108	10.5919	9.30306	9.86967	9.91858	9.72565	10.1369	9.76875
LE01Gene01487	6.93648	7.00476	6.6332	8.3738	8.05052	8.10502	8.1419	8.18071	8.25109	7.10721	7.18533	7.50436	8.33908	8.0384	8.66132	7.91623	8.02198	8.72201
LE01Gene01488	10.4945	10.1019	10.2817	10.8115	10.6703	10.73	10.6986	10.8504	10.6206	10.1057	9.99101	9.99983	10.32	10.2152	10.0551	10.2346	10.1091	10.3947
LE01Gene01489	7.74333	8.02058	7.86988	9.43976	8.93952	9.22458	10.2181	9.51819	10.2489	8.1957	7.715	8.06238	8.82323	9.57104	9.06066	9.64964	9.35366	9.1455
LE01Gene01490	8.83684	8.71313	8.70636	9.25201	9.28643	9.10988	9.55917	9.19368	9.31645	8.6119	8.51276	8.82633	9.64743	9.21762	9.35043	9.08916	9.24801	9.44189
LE01Gene01491	12.8808	13.4845	12.9215	11.6497	11.5105	11.6484	11.4112	11.4746	11.5287	13.4268	13.5293	13.0413	11.6381	11.4836	11.4566	11.2091	11.0985	11.2545
LE01Gene01492	9.37749	9.891	9.11186	8.1869	8.566	8.78175	8.03919	8.71486	8.57845	10.5012	10.8497	10.08	9.32637	10.1195	9.39095	8.72374	9.74726	9.09397
LE01Gene01493	0	0	0.933459	3.85153	0	2.93881	0	0	2.12898	0	2.76167	2.332	2.50555	0	0	0	0	0
LE01Gene01494	10.0489	9.64736	10.3636	13.3378	11.7727	12.0305	11.7756	10.1242	12.9325	9.9586	10.3009	10.2782	9.38206	8.82738	9.60891	10.004	9.03406	9.71007
LE01Gene01495	11.7066	11.809	12.1249	12.9032	12.5658	12.9062	12.0548	11.9054	12.0786	10.7885	10.8223	10.6859	11.3554	10.8017	11.0972	10.7002	11.1649	11.2386
LE01Gene01496	9.75189	9.73106	9.98017	10.8215	10.8223	10.7675	10.8149	10.6861	10.7317	10.0942	10.0798	10.6859	10.9404	10.6829	10.8764	10.2346	10.3549	10.911
LE01Gene01497	8.37575	8.83012	8.55753	7.78876	7.54478	7.95803	7.71197	8.03384	7.92367	10.2146	9.38751	8.70952	8.84981	9.08527	9.38873	8.65713	8.71798	9.29446
LE01Gene01498	10.146	10.0778	9.69675	9.71988	9.85761	9.92851	9.64036	10.0943	9.77295	9.86409	9.92818	10.0827	9.75446	9.53953	10.4185	9.79956	9.40715	10.2598
LE01Gene01499	5.37489	7.10856	6.32476	9.35805	7.53755	9.27426	8.25508	5.91381	9.91921	5.35051	4.70346	4.87013	6.49016	6.74562	6.27493	9.11421	7.06851	6.82364
LE01Gene01500	9.18348	9.89682	9.17681	11.2036	9.83273	10.9179	9.60933	8.2806	11.0711	7.92887	4.99261	5.89501	7.60508	6.8819	7.71183	10.0892	8.29301	9.46438
LE01Gene01501	8.45188	8.12824	7.75912	7.14521	7.40877	6.27059	6.86112	6.70009	6.43423	9.88053	9.67795	9.94183	6.84748	6.60946	6.58539	7.04883	5.0545	6.51433
LE01Gene01502	4.02665	0	3.46053	2.62467	3.36918	4.57658	3.95961	0	3.32157	2.54935	3.85708	3.33326	4.60841	3.76168	3.95055	3.53572	0	3.31353
LE01Gene01503	7.74938	8.31777	8.20399	9.14546	8.66552	9.0068	8.95766	8.40534	8.29308	8.22876	8.31741	8.54002	8.84688	8.25012	8.47704	8.19714	8.16924	8.77859
LE01Gene01504	10.4469	9.8749	9.95923	10.9362	10.5143	10.7722	10.735	10.2975	10.5767	9.27464	9.24357	9.76912	9.77155	9.25461	9.87322	10.1088	9.39569	9.87942
LE01Gene01505	12.426	12.4549	12.1448	12.8583	12.2519	12.8403	13.4564	12.2931	13.3113	12.403	12.2157	12.1699	12.3616	13.0853	12.0969	13.096	13.2585	12.3578
LE01Gene01506	12.4363	12.402	11.9512	12.1139	11.9786	12.0077	12.2202	12.2233	12.2632	12.5536	12.6335	12.868	12.9999	12.912	13.1358	12.9486	12.6468	12.8908
LE01Gene01507	9.29928	9.12318	10.0974	9.13754	10.4122	10.2518	9.7783	10.9225	9.75991	8.94876	10.0087	9.76243	10.5372	10.808	10.7898	9.87802	9.92838	10.6237
LE01Gene01508	10.8259	10.3802	10.9319	11.0298	11.0915	11.1023	11.2744	11.406	11.2449	10.928	11.0367	11.2835	11.7176	11.5446	11.6656	11.3022	11.5983	11.56
LE01Gene01509	10.7646	10.7703	10.1992	10.3558	10.1209	10.1197	10.1381	10.5049	10.3393	10.4074	9.67455	9.72337	10.387	10.1712	10.5194	10.1803	9.95048	10.0702
LE01Gene01510	11.2354	11.4909	11.5286	12.9647	12.7166	12.9614	13.0831	12.6513	13.1596	11.0865	11.3351	11.3778	12.5367	12.828	12.6478	12.6745	13.013	13.2966
LE01Gene01511	9.52046	9.43214	9.83395	9.89138	9.54979	9.96609	9.8895	9.20644	9.89385	9.40016	9.61905	9.87985	9.87437	10.1844	9.61652	9.9447	10.102	9.75223
LE01Gene01512	9.74737	9.65937	9.54511	9.71457	9.47986	9.74371	9.7783	9.78123	9.75991	9.62254	9.29758	9.83911	9.80211	9.79001	10.1773	10.099	9.51701	9.66663
LE01Gene01513	2.86776	2.2727	3.33607	4.04459	4.07605	4.73977	4.659	4.80961	4.80697	2.96258	0	0	4.55198	4.34545	4.74539	4.32734	4.1851	4.6349
LE01Gene01514	11.4324	11.7786	11.6274	11.7449	11.7337	11.6531	11.5583	11.483	11.532	11.2251	10.921	10.9624	10.7528	10.6027	10.4645	10.6344	11.0678	11.0887
LE01Gene01515	12.2649	12.148	12.0759	11.48	11.6624	11.4988	11.2913	11.7546	11.4215	11.5603	11.327	11.651	11.3764	11.159	11.5776	11.1974	10.9165	11.4211
LE01Gene01516	12.5832	12.4935	12.6269	11.9801	12.0853	12.2456	12.2773	12.1479	12.0921	12.0903	12.2994	12.0807	11.8879	11.5892	11.4037	11.328	11.3389	11.7439
LE01Gene01517	12.7318	13.0083	12.5982	12.2127	12.6015	12.343	11.8796	12.5993	11.8919	13.1567	12.9379	12.9015	12.148	11.7939	12.1071	11.9245	11.7702	12.3275
LE01Gene01518	11.4168	11.67	11.2958	10.8313	11.033	10.9334	10.7049	10.8825	10.9784	11.7028	11.5502	11.4994	10.9561	11.2665	11.5713	11.1471	11.2797	11.3824
LE01Gene01519	9.07693	8.68318	9.08311	9.50483	9.4123	9.43576	9.7005	9.95306	9.63487	9.43295	9.52783	9.30027	10.1295	10.0034	10.2303	10.5725	10.0735	9.47449
LE01Gene01520	11.8194	11.0539	11.7337	12.5806	12.2059	12.5574	12.1541	12.1242	11.8625	10.7212	10.7353	10.5862	12.3299	11.677	11.6104	11.5574	11.0431	12.4697
LE01Gene01521	5.89466	5.10988	5.67361	7.76154	7.57334	8.21548	6.20538	6.05592	7.08707	5.6859	4.64909	5.05659	6.96019	6.1012	6.92898	6.63742	6.57814	7.61276
LE01Gene01522	10.729	10.9126	10.3726	10.0559	10.4377	10.1683	10.2181	10.2391	10.4066	10.5783	10.723	10.7915	10.5226	10.2105	10.6363	10.6199	9.86663	10.4552
LE01Gene01523	10.8202	11.0636	10.646	9.96931	10.152	10.2118	10.2842	10.164	10.3356	11.0433	10.98	10.7972	9.58903	9.99792	9.98626	10.0508	10.225	9.93612
LE01Gene01524	15.2355	15.3349	15.3027	15.4415	14.8162	15.2091	14.5432	13.8941	14.5538	15.0994	15.0893	14.8035	14.6943	13.8233	14.0341	14.7565	14.1882	14.449
LE01Gene01525	12.2655	12.1091	12.2061	12.803	12.6396	12.7631	13.244	13.0444	13.1166	12.2083	12.4442	11.862	12.8791	13.3576	13.0474	13.0527	13.408	13.4079
LE01Gene01526	9.40456	8.5786	9.23896	11.6126	10.8962	11.1766	11.3989	10.6417	11.0204	9.7581	10.2063	10.5834	11.8167	11.3781	11.3999	11.8289	11.3679	12.685
LE01Gene01527	4.10419	4.58458	5.29329	4.6895	5.15105	4.18156	4.659	0	5.52317	4.81663	5.15749	5.43855	2.24578	5.03969	5.25493	5.16877	5.31028	5.03534
LE01Gene01528	9.87175	10.2511	9.91096	9.80901	10.0792	9.68315	10.0484	10.2242	10.3089	9.88794	10.5069	10.38	9.79149	10.3204	10.3539	9.90219	10.2532	10.1083
LE01Gene01529	13.4178	13.1092	13.2977	12.9292	12.9682	12.9274	12.9403	13.2615	13.1273	13.6521	13.5867	13.4741	13.3342	13.3975	13.2706	13.7998	13.6845	12.8494
LE01Gene01530	9.53278	9.32416	10.1129	10.6976	10.4483	10.8315	10.9678	10.594	10.9418	8.76461	8.53542	8.86742	10.2944	10.235	10.2303	10.1724	10.2224	10.7228
LE01Gene01531	10.389	10.5241	11.2119	14.1921	13.0459	13.9997	14.6939	12.6793	14.4087	10.3949	10.0964	9.96531	13.0312	12.6143	11.3965	12.2401	12.3419	12.8275
LE01Gene01532	10.9564	11.5594	10.9325	10.6493	10.4779	10.5382	10.2019	9.97708	10.5248	10.9961	10.7156	10.5253	9.73874	9.25461	9.4624	9.32911	9.51489	8.96796
LE01Gene01533	10.7608	10.9599	10.572	9.43761	9.51709	9.25864	9.27831	9.47456	9.2567	10.8596	10.4896	10.3379	8.74359	8.36453	9.02963	9.4055	9.09769	8.94197
LE01Gene01534	15.2328	15.2359	15.3411	15.1878	14.6864	15.0038	14.3884	14.0167	14.4969	15.1963	15.134	14.9493	14.8299	13.8633	14.2098	14.6661	14.0867	14.219
LE01Gene01535	10.446	10.7719	11.4341	12.2904	12.2436	12.2299	11.453	11.8299	10.9936	10.7589	10.4593	10.3401	11.4621	11.0871	10.6184	10.7463	11.2469	12.2454
LE01Gene01536	12.4239	12.5142	12.1302	11.1998	11.5542	11.3049	11.0302	11.5769	11.4427	12.3177	12.225	11.851	11.1663	11.1504	11.5678	11.6416	11.3214	11.0344
LE01Gene01537	11.3793	11.8028	11.7213	10.8362	11.1979	10.9348	11.1004	11.3548	11.1171	12.1571	12.0887	12.1693	11.5933	11.7251	11.6218	11.6194	11.565	11.0998
LE01Gene01538	10.871	10.7892	10.4693	9.85964	10.1778	9.79101	9.95269	10.3491	10.0022	10.7204	10.6677	10.5034	9.72126	9.44468	10.076	9.89257	9.56895	9.84554
LE01Gene01539	10.1159	10.4007	10.0745	9.15334	9.18829	9.18971	9.41534	9.25391	9.57656	10.1788	10.0446	10.0308	9.17345	9.15785	9.1785	9.37128	8.92667	8.73215
LE01Gene01540	13.1195	12.994	12.741	12.3547	12.5631	12.3666	12.3374	12.8911	12.2836	13.1181	13.4089	13.3756	12.772	12.6785	13.0022	12.7627	12.5222	12.6177
LE01Gene01541	12.532	12.9016	12.4077	11.6886	11.8118	11.6501	11.5961	11.6571	11.4953	12.9364	12.722	12.5002	11.3784	11.489	11.5441	11.5297	11.6231	11.3488
LE01Gene01542	11.3592	11.8833	11.6755	12.0464	11.8178	11.9616	12.0269	11.7132	12.0928	11.5478	11.1639	11.3334	11.2874	11.2665	11.2223	11.1909	11.7043	11.6453
LE01Gene01543	10.8682	10.5803	10.7834	11.0939	11.061	11.0475	10.9998	11.3147	11.2981	10.7434	10.7834	11.0105	11.0641	10.7916	11.2421	11.4039	10.7374	10.8061
LE01Gene01544	12.6512	12.6086	12.0557	11.4193	11.719	11.5045	11.4679	11.947	11.7284	12.9115	13.1031	13.2185	12.0856	11.8748	12.513	12.0882	11.7478	11.5211
LE01Gene01545	11.828	11.7269	11.9224	10.9499	11.4289	11.0822	11.1513	11.6609	11.2063	11.9691	11.9203	11.7675	11.1014	11.06	11.6293	11.3679	10.9148	10.7696
LE01Gene01546	14.5203	14.5728	14.6157	14.5411	15.0567	14.7878	14.4847	15.4366	14.5116	14.7226	14.6565	14.8714	15.1684	14.8185	15.6113	14.8784	14.745	15.2404
LE01Gene01547	9.21659	9.02047	9.24978	8.9752	9.10271	9.19206	9.60484	9.34441	8.77274	8.65075	8.66094	8.22686	8.60137	8.5875	8.35036	8.07773	8.16385	8.63455
LE01Gene01548	8.84533	9.07274	9.32947	9.42899	9.54439	9.44762	9.84833	9.68971	9.64504	8.97683	8.41432	9.25811	9.57317	9.40204	10.0211	9.30997	9.441	9.45625
LE01Gene01549	13.5576	13.6949	13.3224	11.6357	11.9702	11.6054	11.3562	12.2002	11.2536	13.7542	13.4205	13.4292	11.8416	11.5409	11.8665	11.643	11.3431	11.475
LE01Gene01550	12.509	12.702	12.0976	10.7418	11.1643	10.8709	10.6173	11.1905	10.5649	12.8417	12.7279	12.7849	11.2573	10.8494	11.4026	10.995	10.9692	11.0061
LE01Gene01551	9.71529	9.42613	10.3775	10.8007	10.607	10.8102	10.6417	10.3305	10.6673	7.34973	7.18533	7.16224	9.25305	8.61976	8.34579	9.88935	9.31281	9.36572
LE01Gene01552	10.6301	10.8556	11.3369	12.739	12.4215	12.6591	12.7415	12.0251	12.6276	10.8275	10.3676	10.732	12.1876	12.1477	12.0687	12.2937	12.3275	12.4677
LE01Gene01553	14.1272	14.531	13.9887	12.2742	12.9919	12.2924	12.1234	13.1351	12.0783	14.5751	14.2555	14.172	12.2697	12.1748	12.5288	12.2726	12.3612	12.1423
LE01Gene01554	11.6613	11.3863	11.4627	11.158	11.2442	11.1092	10.918	10.9233	10.9516	11.2695	11.6405	11.5139	11.7164	11.3415	11.2863	11.5675	11.0489	10.9935
LE01Gene01555	8.67156	8.92701	8.68738	8.98111	8.53003	8.74379	8.91479	8.30453	8.53536	9.39393	9.29758	8.69203	8.42014	8.26832	8.22648	8.69451	8.75074	8.50639
LE01Gene01556	9.07693	9.2237	9.37367	9.43115	9.73657	9.63557	9.66644	9.72028	10.0366	8.89093	8.83846	8.82633	9.42197	9.47046	9.84271	9.4972	9.65222	9.85795
LE01Gene01557	11.3175	10.9928	11.3849	10.3259	10.8813	10.3624	10.081	10.8504	10.3898	11.2304	11.3346	11.0154	10.6741	10.7395	10.6466	10.7266	10.3214	9.96652
LE01Gene01558	9.73675	9.90693	9.83826	9.80068	9.93805	9.52799	9.5096	9.69877	9.57443	9.52136	9.7652	9.47609	9.70194	9.89185	9.72086	9.72203	10.1133	9.27839
LE01Gene01559	14.588	14.7753	14.6248	14.7351	14.312	14.5232	14.1014	13.9234	14.1594	14.6225	14.572	14.4286	14.3732	14.1507	14.1434	14.1103	14.0917	14.057
LE01Gene01560	12.698	12.813	11.9888	10.6768	10.938	10.272	9.89687	10.9711	10.2206	12.3417	12.1187	12.2342	10.8943	10.9634	11.1676	11.0949	11.0268	10.2062
LE01Gene01561	11.0015	10.8444	10.8539	10.6594	10.8998	10.7153	10.4309	11.3427	10.5841	11.4684	11.7426	11.8486	11.178	11.1344	11.534	11.145	11.0364	10.6772
LE01Gene01562	9.8381	9.23751	8.80651	10.6557	9.41822	8.17326	7.9987	7.66383	7.19066	7.89397	8.09141	8.26047	6.93834	6.7194	7.35932	7.6607	6.56182	8.02412
LE01Gene01563	10.8195	10.6508	10.5282	9.8206	9.97465	9.83982	9.6857	9.84136	9.72582	11.3268	11.2093	10.8868	10.0193	9.42453	9.59549	9.7093	9.37015	9.47248
LE01Gene01564	11.4976	11.3138	11.4092	13.247	12.2858	13.4609	12.7781	11.4592	13.7217	11.032	11.1221	10.8612	12.2331	12.7362	11.4661	12.675	12.7471	12.2068
LE01Gene01565	8.51712	8.55307	8.5043	9.08085	8.66883	8.62002	8.84037	8.6416	8.56137	8.60831	8.43857	8.51637	8.55546	8.21301	8.77454	7.90989	8.63073	9.37654
LE01Gene01566	10.68	10.2144	10.4674	10.7349	10.6377	10.8125	10.5824	10.5516	10.5379	9.50024	9.49738	9.81347	10.383	9.75171	10.2002	10.3863	9.71811	10.0075
LE01Gene01567	11.9257	12.1769	11.7646	10.9716	11.0847	10.92	10.3726	10.8471	10.6772	11.9589	11.7751	11.2829	10.2629	10.4225	10.0424	10.9586	10.5832	10.5004
LE01Gene01568	11.2836	11.4475	11.1692	13.0605	12.969	13.348	13.655	13.0348	13.6548	11.1202	11.1778	11.6328	12.3835	12.659	12.9236	12.9134	13.174	13.5117
LE01Gene01569	10.9287	10.5575	10.7699	10.8589	11.0278	10.9845	11.1304	11.3218	10.9235	10.8159	10.98	11.0133	10.4307	10.0209	10.2303	10.5099	10.1258	10.6524
LE01Gene01570	11.3656	11.7383	11.5676	11.8448	12.0568	11.9129	12.1013	12.3668	12.0816	11.2122	11.0518	11.0961	11.6355	11.6973	11.8577	11.4028	11.7141	12.1486
LE01Gene01571	7.96216	7.82721	8.00886	7.3046	7.24977	7.63755	7.64359	7.15441	7.72326	8.66462	8.57606	8.30716	7.1622	7.44288	7.66854	8.20234	7.28275	6.81093
LE01Gene01572	13.1607	12.8693	12.97	12.1963	12.1352	12.38	11.6057	11.5511	11.9076	12.4453	12.5805	12.4868	11.8334	11.6103	12.0621	11.2498	11.5868	11.9868
LE01Gene01573	14.4006	14.2398	14.0278	13.3811	13.514	13.4324	13.1855	13.4749	13.299	14.6191	14.8724	14.5872	14.3136	14.4133	14.3373	14.4027	14.3549	13.8782
LE01Gene01574	13.6661	13.7896	13.6593	12.2049	12.5814	12.2101	11.9176	12.7635	11.976	13.9579	13.7144	13.6132	12.5476	12.7663	12.8776	12.398	12.7686	12.418
LE01Gene01575	12.0296	12.6644	12.224	12.0201	11.9665	11.892	12.3589	11.6929	12.5521	12.4268	12.3657	12.4399	12.297	12.5523	12.3138	12.6438	12.6187	12.5039
LE01Gene01576	10.9823	10.8481	10.8317	11.3643	11.3162	11.546	11.6461	11.5556	11.5182	10.7916	11.0823	11.3569	11.5793	11.5742	11.7266	11.5015	11.4439	11.6627
LE01Gene01577	10.2467	10.035	10.0275	10.0919	10.2613	10.1284	10.1067	10.4021	9.95725	10.0865	10.4223	10.5872	10.3921	10.1904	10.6878	10.2155	10.1935	10.3216
LE01Gene01578	14.6518	14.5021	14.5578	14.2726	13.7954	14.1497	13.2422	13.241	13.4398	14.8139	14.7333	14.4686	14.1439	13.047	13.6809	13.872	13.074	13.4106
LE01Gene01579	11.1872	11.3941	11.4193	11.4425	11.3645	11.5223	11.5933	11.4825	11.7846	12.1733	11.9783	12.0238	11.7446	11.9662	12.4385	11.8642	12.289	12.3358
LE01Gene01580	11.8507	11.6036	11.9732	11.8879	11.9414	11.9491	11.8419	11.9554	11.916	12.0172	11.9669	12.4402	12.4191	11.9948	12.3393	12.3239	11.7159	12.1515
LE01Gene01581	10.0659	9.85115	10.0998	9.13754	9.46469	9.36041	9.24119	9.70597	9.22179	9.83831	9.66087	9.74727	8.88164	8.59112	9.31344	9.29301	8.87148	8.82674
LE01Gene01582	10.3997	10.2179	10.8868	10.5181	10.3833	10.5692	10.4585	10.6332	10.6227	10.1968	10.3718	10.5164	10.1722	10.0034	10.0842	10.492	10.2237	10.4253
LE01Gene01583	10.8549	10.5465	10.53	10.2496	10.3933	10.3593	10.2371	10.3605	10.2462	10.9872	10.8116	10.862	10.9077	10.8088	11.4293	10.7463	10.6484	10.9914
LE01Gene01584	12.8792	12.858	13.3156	14.9731	14.6151	14.8753	14.8025	14.3283	14.5879	12.3106	12.0671	12.4971	14.4788	14.2694	14.2092	14.4949	14.5001	15.2154
LE01Gene01585	9.22962	9.51382	9.56258	9.20478	9.25151	9.30717	9.63597	9.53447	9.1234	9.48273	9.37291	9.3941	9.38206	9.89771	9.69052	9.14424	10.075	9.82357
LE01Gene01586	11.281	11.0217	11.3471	12.8693	12.5273	12.8691	12.83	12.4437	12.6994	11.1133	11.1475	11.251	12.7256	12.8267	12.5535	12.3551	12.6619	13.1757
LE01Gene01587	10.2584	10.0688	10.3805	11.2751	11.0934	11.3893	11.5266	11.4027	11.5623	9.7402	9.91528	9.68499	10.977	10.9972	11.1074	10.9346	11.0438	11.0755
LE01Gene01588	14.5633	14.6959	14.8014	14.0805	14.3456	14.3094	14.6791	14.3234	14.849	14.9209	14.8144	14.9322	14.6868	14.9817	14.6665	14.6517	14.9396	14.6177
LE01Gene01589	13.062	12.7454	13.3879	12.7177	12.7224	12.5174	12.7999	12.7036	12.9389	13.1147	13.1422	13.0544	12.8299	12.8689	12.5318	13.2726	13.1595	12.3907
LE01Gene01590	11.0284	10.8338	10.9346	11.4643	11.4736	11.5606	11.6324	11.6046	11.7365	10.2356	10.2192	10.59	11.1131	11.1375	11.6109	11.4538	11.1182	11.4567
LE01Gene01591	10.6761	10.3423	10.3536	10.5151	10.4162	10.5446	10.8998	10.7069	10.125	9.71543	10.0772	9.95947	9.98641	10.0343	9.72791	9.60715	9.75804	9.59245
LE01Gene01592	12.2235	12.0851	11.836	11.0312	11.4206	11.2708	11.31	11.5998	11.4019	11.7983	11.8262	11.8363	11.4209	11.3083	11.6494	11.9248	11.2545	11.3554
LE01Gene01593	15.1813	15.3343	15.3232	14.1766	14.6431	14.1352	14.0806	14.6419	14.152	15.6886	15.5686	15.9571	14.7795	15.2612	15.6972	15.2585	15.2523	14.7553
LE01Gene01594	11.2965	11.133	11.0262	10.7813	10.703	10.5665	10.4245	10.7889	10.5607	11.343	11.8131	11.7242	11.0322	11.1608	11.165	11.1987	10.9372	10.8338
LE01Gene01595	10.8273	10.6142	11.075	11.4553	11.3377	11.6493	11.5653	11.4751	11.4239	10.7924	10.6668	10.8868	11.6553	11.0422	11.6142	11.1711	10.7273	11.652
LE01Gene01596	12.9057	12.4647	12.3907	11.8358	11.7416	11.9879	11.8125	11.9516	12.0643	13.0048	13.1429	13.3	12.5955	12.5975	12.9252	13.0833	12.8076	12.011
LE01Gene01597	11.0869	11.11	11.2053	12.1459	11.9699	12.0384	12.3522	12.0193	12.3559	11.2374	11.6283	11.3089	12.1884	12.556	12.164	12.3239	12.2995	12.3942
LE01Gene01598	11.8844	12.3002	12.1994	11.8557	12.354	11.6914	12.7878	12.4496	12.6186	10.3125	10.0274	10.5469	11.1288	12.5345	11.2635	10.5924	13.4604	12.0047
LE01Gene01599	12.6947	13.1504	13.4814	15.4317	15.325	15.1846	16.0683	15.4039	15.8809	12.7146	11.647	12.1847	14.0424	14.2017	13.5249	14.2205	14.7878	15.2419
LE01Gene01600	4.43947	4.11163	5.07701	5.2557	4.76194	0	5.52004	4.91285	5.52317	4.41856	5.23336	4.96637	5.03628	4.59661	4.79991	4.7243	5.65599	3.89818
LE01Gene01601	10.3548	10.1244	10.0136	8.90539	8.94773	8.7629	8.09146	8.37402	8.35385	10.2484	9.93814	9.99699	8.74673	7.77752	8.41727	8.32183	7.34127	8.00751
LE01Gene01602	10.8549	11.2414	11.0437	10.7012	10.4541	10.4238	10.5512	10.4154	10.6633	11.124	10.7443	10.7997	10.0891	9.91225	10.3275	10.3713	10.1587	9.9963
LE01Gene01603	12.9925	13.1714	13.2254	12.9838	13.0893	13.0349	13.0774	13.0933	12.9965	13.0079	12.9131	12.7925	13.056	13.2561	13.1147	12.8728	13.2727	13.061
LE01Gene01604	10.4855	10.6628	10.3617	9.87242	9.9612	10.0973	10.7185	10.7632	10.7656	10.439	10.2606	9.59376	9.41011	9.33669	9.53249	9.50984	9.71443	9.23623
LE01Gene01605	10.3468	10.1897	10.5634	12.6095	12.8987	13.1733	14.6963	13.8691	14.4623	10.4886	10.476	10.7413	12.474	12.3176	12.7169	13.0393	12.7541	12.9146
LE01Gene01606	5.82767	5.49413	6.47987	9.15595	8.64884	8.96891	11.7605	10.4055	10.9784	4.35154	4.75586	4.4043	9.89862	10.4635	8.35036	10.7293	10.9419	11.6993
LE01Gene01607	11.757	11.7919	11.7337	11.2502	11.4679	11.4763	11.3622	11.4502	11.4067	11.7233	11.3765	11.2729	11.289	10.8524	10.8581	10.964	10.6695	11.2201
LE01Gene01608	10.8266	10.8429	11.3134	11.5483	11.5533	11.5363	11.5583	11.8697	11.6391	11.2374	10.9388	11.5278	11.7055	11.6817	11.8593	11.8082	11.6842	11.9114
LE01Gene01609	10.5501	10.0994	10.3078	10.201	10.6461	10.1539	10.2487	11.0539	10.3837	10.3918	10.4354	10.6885	10.6599	10.7387	10.9415	10.7693	10.5751	10.6657
LE01Gene01610	9.61951	9.9949	10.2604	10.7436	10.6352	10.8921	10.737	10.7906	10.7336	9.59383	9.46627	9.31406	10.5199	10.5664	9.95507	10.3794	10.6475	10.7083
LE01Gene01611	10.3033	10.1477	10.1573	10.3213	10.3671	10.1802	10.5002	10.638	10.2151	10.067	10.0019	10.2498	10.2998	10.1157	10.1141	10.3942	10.1048	10.031
LE01Gene01612	11.8619	12.155	11.8599	11.5263	11.4746	11.3082	11.4869	11.6247	11.1439	11.7315	11.515	11.3078	11.029	10.8756	11.0614	11.0284	11.1642	11.3543
LE01Gene01613	13.0509	13.2344	12.8971	11.6381	11.7945	11.4377	11.4851	11.9637	11.5303	13.2614	13.1322	13.0103	11.7587	11.3001	11.7515	12.0357	11.1863	11.3294
LE01Gene01614	7.48527	7.3049	7.07412	8.29529	7.8895	8.28322	8.45784	8.15987	8.32378	7.86423	7.68153	7.26989	7.46693	8.37716	7.9654	8.31705	8.16385	8.04055
LE01Gene01615	11.5322	11.0848	11.3819	11.7809	11.4769	11.6273	11.8467	11.3565	11.5553	10.923	11.0842	11.4436	11.9112	11.2716	11.5386	11.0552	10.7108	11.7851
LE01Gene01616	13.3353	13.1879	13.2461	13.2983	13.6405	13.5176	13.1813	13.3674	13.3299	13.2526	13.4143	13.5573	13.4525	13.3716	13.3436	13.6891	13.4312	14.059
LE01Gene01617	11.2375	12.1501	12.3961	12.521	12.8766	12.7584	12.1815	12.5656	12.188	12.2906	11.8891	11.9463	11.2976	11.7629	11.0911	11.3221	12.5883	13.7278
LE01Gene01618	10.7846	10.7039	11.2047	10.9893	11.3398	10.9797	10.9651	11.4788	11.1374	10.7171	10.6643	10.9963	11.5399	11.3431	11.3482	11.4146	11.257	11.2504
LE01Gene01619	12.0312	12.1733	12.0058	11.4711	11.603	11.6768	11.0592	11.7855	11.2916	11.9044	11.9858	11.777	11.6628	11.8707	11.8264	11.0731	11.5256	11.8779
LE01Gene01620	12.8554	13.1045	12.6436	11.8423	12.2283	11.9495	11.6516	12.2444	11.7591	12.6478	12.4462	12.2351	11.4967	11.2995	11.5285	11.2735	11.4282	11.5747
LE01Gene01621	12.3756	12.6482	12.9014	13.3597	13.0979	13.5539	13.2846	13.0387	13.386	12.398	12.1496	12.2269	12.9928	13.0938	12.9157	12.8266	13.3328	13.571
LE01Gene01622	10.5919	11.0578	10.995	10.7948	10.711	10.8064	10.7319	10.5416	10.8594	10.9323	10.9131	10.5164	10.4473	10.3781	10.5955	10.6238	10.803	10.5784
LE01Gene01623	12.668	12.4045	13.1368	14.1133	13.7373	14.0283	13.9601	13.6867	13.7936	12.2452	12.0433	12.7176	13.9514	13.5387	13.5942	13.5978	13.3248	14.0599
LE01Gene01624	8.39516	8.26483	9.04386	10.6465	10.3099	10.5756	10.5253	10.3468	10.3356	7.88215	7.24153	8.36127	10.0616	10.0101	10.1381	10.0393	9.80904	10.6868
LE01Gene01625	10.523	10.2647	10.1992	10.2174	10.2744	10.213	10.4027	10.2279	10.7163	10.3666	10.3421	10.3457	10.1804	10.4851	10.6797	10.2168	10.6201	10.4429
LE01Gene01626	11.6804	11.316	11.3155	10.7974	10.9005	10.8308	10.8795	10.7744	10.7684	12.0233	12.0597	12.1791	11.6856	11.6503	11.6246	12.057	11.4643	11.1296
LE01Gene01627	12.1897	12.3518	11.9765	11.2703	11.5087	11.2405	11.0956	11.441	10.98	12.5206	12.7606	12.5688	11.2086	11.8021	11.5194	11.3621	11.671	10.9507
LE01Gene01628	8.26194	8.02058	8.40712	8.74784	9.49113	9.34358	9.11745	9.36048	9.20264	7.40035	8.47419	8.39192	9.17812	10.5692	10.5897	9.54506	10.816	10.2231
LE01Gene01629	9.18794	9.20509	9.79458	11.5602	11.0989	11.7576	11.813	11.0881	11.8228	8.88206	9.05519	8.886	11.0367	11.1163	11.331	11.2264	11.3389	11.9949
LE01Gene01630	10.4282	9.98402	10.2125	9.77878	9.91453	10.4407	10.5336	10.1309	10.7115	10.2993	10.3968	10.358	10.3378	10.9993	9.40421	11.0218	11.3227	10.7547
LE01Gene01631	11.2642	11.2562	11.3907	11.3857	11.0142	11.1617	11.2581	10.9576	11.0994	11.1031	11.1039	11.0034	11.3008	11.1132	11.1081	11.1935	11.0584	11.2933
LE01Gene01632	11.8713	11.7286	11.7684	11.3672	11.3382	11.1216	11.4208	11.464	11.2929	12.112	12.0551	11.9686	11.9116	11.962	11.8887	11.9879	11.6083	11.2824
LE01Gene01633	13.7445	13.7733	12.6719	9.72341	9.44358	9.41377	9.10479	8.98741	9.30879	14.5919	14.5538	14.6406	11.6966	11.262	10.5575	10.3805	11.1286	10.4855
LE01Gene01634	12.4255	12.3497	12.2921	11.9827	12.0899	12.1329	12.2344	11.9797	12.3253	12.398	12.9165	12.9059	12.5804	13.0964	13.0138	12.7702	13.1459	12.9047
LE01Gene01635	15.0873	15.3192	15.2826	15.3193	14.7376	15.0302	14.2185	13.8171	14.4525	14.9134	14.8157	14.4046	14.46	13.7152	13.6137	14.5175	14.1544	14.136
LE01Gene01636	9.86202	10.4119	10.2668	10.1162	9.61306	9.72109	9.5638	9.13617	9.76178	10.2169	9.92246	9.96676	9.81116	9.38337	9.58194	8.99342	9.19874	9.49052
LE01Gene01637	11.3871	11.3702	10.6145	9.29536	9.53897	8.92151	8.74976	8.8082	9.45698	11.0559	11.0039	11.1354	10.0717	8.90214	9.32045	9.49084	8.42514	9.08344
LE01Gene01638	8.79361	8.36045	8.94345	9.57688	9.10515	9.34147	10.3687	9.06791	10.1538	8.39607	8.63319	8.48422	9.22625	9.85016	8.12337	9.82844	10.1655	9.79803
LE01Gene01639	9.91408	10.1231	9.96186	11.4884	11.8444	11.4015	11.219	11.5576	11.3135	9.70875	10.3206	10.0252	11.0082	12.2859	11.396	11.0773	12.4937	11.6502
LE01Gene01640	9.6682	9.54931	10.0338	10.8677	10.6233	10.8877	10.8071	10.5069	10.4992	9.31697	8.75726	9.08402	10.1954	10.0749	10.0718	10.2435	10.3526	10.5539
LE01Gene01641	10.5283	10.3381	10.7053	10.8305	10.7616	10.9674	10.8645	10.8625	10.7066	10.2146	10.3729	10.9668	10.8922	10.4996	11.0361	10.5235	10.1709	10.8251
LE01Gene01642	12.4471	12.3832	12.767	12.0861	12.1619	12.0013	11.9458	12.2298	12.0348	12.1302	12.1618	12.0787	11.9262	11.9825	11.9377	12.2461	11.8775	11.6104
LE01Gene01643	11.3924	12.124	11.5246	10.3467	10.8119	10.4998	10.6106	10.9531	10.4374	11.0948	10.7507	11.2159	10.8208	11.8284	10.8906	10.5954	12.1843	10.8809
LE01Gene01644	13.0022	12.7764	12.5833	12.435	12.5195	12.4969	12.8099	12.6178	12.7998	12.7811	12.7926	13.0122	12.3928	12.2318	12.4128	12.4121	11.9907	12.1099
LE01Gene01645	11.3705	11.1927	10.6816	9.67134	9.58528	9.43774	9.75823	9.65663	9.33667	11.3268	11.3173	11.098	9.79301	9.2705	10.0268	10.241	9.39569	9.79319
LE01Gene01646	7.16173	7.58957	6.4044	10.6904	8.50059	8.53736	12.5049	9.78804	11.068	7.46519	6.57647	8.00122	8.11882	7.51326	7.404	7.56706	7.36026	11.5356
LE01Gene01647	11.8858	12.3545	11.966	11.074	11.1293	10.9242	11.1598	11.1249	11.0141	11.9757	11.6745	11.5512	10.6064	10.4596	10.9155	10.5359	10.9945	11.3684
LE01Gene01648	13.5972	13.7478	13.3215	12.3306	12.6266	12.2141	12.1939	12.6687	12.3494	13.7776	13.5744	13.4913	12.1977	12.1969	12.6944	12.6011	12.0533	12.1106
LE01Gene01649	11.2929	11.1909	11.2246	11.6882	11.4641	11.4207	11.8768	11.4619	11.8281	10.9712	11.142	10.958	11.2557	11.4943	11.1856	11.1551	11.3461	11.1934
LE01Gene01650	13.7552	13.4726	13.5157	13.5168	13.4457	13.5028	13.7322	13.4216	13.7231	13.561	13.7693	13.8012	13.674	13.5934	13.6857	13.5366	13.2635	13.4848
LE01Gene01651	9.91811	9.88809	10.0914	10.0809	10.0953	10.4197	10.5994	10.5335	10.8733	11.0023	11.6462	11.8514	10.3698	10.8786	10.502	10.6072	11.1231	11.1706
LE01Gene01652	11.1922	11.0184	11.2279	10.4452	10.662	10.7162	11.5944	11.2862	10.9442	11.2853	11.5064	11.7595	11.145	11.3633	11.4125	11.3469	11.9685	12.2554
LE01Gene01653	12.6386	12.2936	12.7557	12.699	12.6283	12.7738	13.1178	12.6231	12.9061	12.8888	12.9937	13.1928	13.468	13.2449	12.9408	13.2312	13.2439	12.6957
LE01Gene01654	10.581	10.5776	10.7061	9.36032	10.1847	10.2507	9.95092	9.54656	10.5148	10.7995	11.3629	11.2036	11.392	12.1922	11.7315	11.3621	12.3151	11.8633
LE01Gene01655	12.0482	11.9144	11.9723	11.4446	11.603	11.5423	11.6613	11.6925	11.7086	12.366	12.4848	12.4302	11.8449	11.9273	12.3502	12.0089	11.7237	11.5705
LE01Gene01656	13.6067	13.2725	13.2888	12.3019	12.383	12.1978	12.0568	12.2662	12.2665	14.1849	14.2832	14.419	12.4241	12.6971	13.5634	13.8824	12.7076	12.484
LE01Gene01657	11.7853	11.608	11.3829	11.2398	11.4971	11.1926	11.1818	11.5476	11.35	12.0189	12.2346	12.3544	12.0042	11.6616	12.302	11.7441	11.4338	11.4506
LE01Gene01658	13.3407	13.2155	13.0628	12.8631	12.9164	12.7777	12.9271	12.9871	12.924	13.5959	14.1442	14.1199	13.8212	14.0018	13.8463	13.8188	13.5911	13.2691
LE01Gene01659	9.65376	9.57852	9.59519	9.89921	9.87922	9.7533	9.39988	9.49133	9.70459	9.31037	10.4867	9.25096	9.91549	9.98147	8.62025	9.72745	9.134	8.97653
LE01Gene01660	10.9545	11.5283	11.4179	10.9745	10.9387	11.0067	11.0844	10.7589	11.1156	11.4304	11.0247	11.0494	11.1581	11.6289	11.1155	11.2435	11.7131	11.3233
LE01Gene01661	12.3685	12.8222	12.5373	12.1055	12.2895	12.1421	12.2521	12.3497	12.3375	12.7045	12.6464	12.612	12.6465	13.1613	12.9269	12.7121	13.2068	13.0522
LE01Gene01662	11.6859	11.3874	11.6954	11.4263	11.6224	11.3908	11.453	11.455	11.3249	11.601	11.6702	11.5805	11.6839	11.5306	11.5275	11.575	11.1369	11.094
LE01Gene01663	10.4972	11.1361	11.1761	10.5273	10.7014	10.6739	10.3753	10.6852	10.634	10.7821	10.6838	10.7061	10.3409	10.3302	10.6951	10.2894	10.5772	10.2703
LE01Gene01664	10.8889	11.3702	11.1182	11.1671	11.0024	10.9136	10.7725	10.7345	10.8357	11.0578	10.6427	10.6162	10.5363	10.5765	10.454	10.3528	10.8365	10.9521
LE01Gene01665	9.04779	9.26248	9.1926	9.53529	9.4723	9.48453	9.27266	9.57044	9.37383	9.30595	9.60305	9.76076	10.0666	10.1394	10.4174	10.5338	10.062	9.80446
LE01Gene01666	8.07238	8.36045	8.50791	7.64719	7.8781	7.99621	8.27781	7.66383	7.96322	8.30158	8.21353	8.15719	8.74987	9.81654	9.03248	8.441	9.86496	9.0675
LE01Gene01667	12.1562	11.7399	12.1752	12.8621	12.6117	12.8115	12.6423	12.6544	12.7023	11.5737	11.6964	11.8399	12.8804	12.519	12.5664	12.6082	12.0826	12.8676
LE01Gene01668	12.2343	12.0539	12.2876	11.9679	11.8687	11.7332	12.0143	12.0687	11.7828	12.5849	12.9557	13.0682	12.6001	12.7651	12.8559	12.5113	12.5198	11.8998
LE01Gene01669	12.3611	12.2764	12.2418	11.6936	11.8568	11.7847	11.686	11.9318	11.5873	12.5915	12.6429	12.5474	12.0002	11.9394	11.907	12.3508	11.9462	11.4378
LE01Gene01670	7.37228	7.38151	7.26543	6.81527	6.09165	6.46978	6.31935	6.82446	6.12114	7.29727	7.02378	7.01248	6.79982	5.8096	6.94116	5.81008	7.03345	6.82364
LE01Gene01671	12.7499	12.6527	12.7534	12.7358	12.9766	12.8079	13.0503	13.1697	13.0314	14.2463	14.4589	14.5405	15.2097	15.2263	15.6087	15.6325	15.3515	14.7327
LE01Gene01672	10.4073	10.3915	10.6776	11.2865	11.0355	11.3249	11.3244	11.1995	10.9703	10.9858	10.8467	10.3657	11.5544	11.5044	10.9826	11.4146	11.7559	11.6035
LE01Gene01673	11.3547	11.3078	11.6124	11.4371	11.2037	11.4617	11.1234	11.2008	10.9776	11.4339	11.2169	11.0787	11.1733	11.0296	10.608	10.3492	11.3895	11.2404
LE01Gene01674	12.6817	12.937	12.9447	16.7075	16.0013	16.2668	17.8302	17.0099	17.7389	12.5086	12.0015	12.9852	14.5738	14.8098	15.0145	14.4891	15.1651	15.4602
LE01Gene01675	14.4773	14.8682	14.784	14.8846	14.7659	14.7767	15.104	14.7403	15.098	14.5779	14.2585	14.2808	14.2001	14.3472	14.1841	14.2835	14.6485	14.4318
LE01Gene01676	7.65591	8.62835	8.00376	7.27602	7.4632	7.52268	8.17256	7.22632	8.50442	8.32797	7.63333	7.80043	7.14323	8.22238	7.29435	6.95337	7.40668	7.40011
LE01Gene01677	8.00322	7.97736	8.32763	10.3131	9.84009	10.2819	10.9546	9.93937	10.7018	7.50428	8.05005	7.89517	10.0206	9.99792	9.86685	10.7266	10.5118	10.5064
LE01Gene01678	6.98853	6.62531	6.71043	8.72336	8.21814	8.34791	9.04309	7.72185	8.90724	6.24311	6.86588	6.90729	8.24432	8.52453	8.0964	9.26346	9.24546	8.33499
LE01Gene01679	13.7422	13.8216	13.5068	12.8671	13.2011	12.9351	13.2447	13.3402	13.1346	14.2208	14.2985	14.2763	13.4694	13.9223	13.831	13.421	13.7234	13.4291
LE01Gene01680	9.87452	10.1562	10.3263	10.5808	10.625	10.8892	10.5122	10.6056	10.693	8.62615	7.70836	8.61617	9.36374	8.85474	8.92314	9.30031	8.7399	9.34383
LE01Gene01681	13.1435	13.4953	13.3663	12.8132	12.619	12.5834	12.4608	12.0575	12.4159	12.9503	12.7911	12.7242	12.2393	11.9859	12.104	11.909	12.2055	11.6458
LE01Gene01682	12.1938	12.4858	12.2322	12.0118	12.0168	12.0338	12.3475	12.1986	12.2309	11.7491	11.8858	11.7225	11.8386	12.3277	11.7183	11.5629	12.6148	12.1452
LE01Gene01683	11.3043	11.2658	11.4355	13.0674	12.6341	12.9725	13.8421	12.8631	13.4584	10.8058	10.9634	11.0712	11.8471	11.6316	11.6303	12.2347	12.1314	13.1345
LE01Gene01684	11.485	11.1471	11.8158	12.263	12.1448	12.2636	12.3448	11.8125	12.2556	11.4176	11.3432	11.4524	11.7509	11.659	11.5989	11.5974	11.5235	11.733
LE01Gene01685	10.4809	10.6881	10.6262	9.31188	9.45322	9.20376	9.05959	9.21656	8.79848	10.6524	10.5127	10.2036	8.92116	8.0224	8.73311	8.66091	9.26575	7.57568
LE01Gene01686	12.2791	12.2239	12.3528	12.9383	12.6254	12.6671	13.4434	12.9314	13.1049	11.8003	11.852	11.777	12.2507	12.3649	12.3579	12.0218	12.32	13.1002
LE01Gene01687	10.6561	11.0623	10.738	11.3767	11.0252	11.0134	11.132	10.931	11.0703	10.9444	10.6973	10.6645	10.5254	10.1627	10.3596	10.5431	10.7062	10.6859
LE01Gene01688	11.9781	11.8712	11.2641	9.50277	9.78926	9.49219	9.00613	10.2951	9.27515	12.1139	11.9845	11.3435	8.26202	8.43873	8.05777	9.30273	8.64629	8.49054
LE01Gene01689	11.8496	12.0157	12.2333	12.4489	12.2997	12.46	12.475	12.1938	12.2968	12.1754	11.9342	11.9852	12.2749	12.2292	12.1552	11.9134	12.2744	12.4365
LE01Gene01690	12.2937	12.2949	12.3221	11.6178	11.6545	11.7137	10.986	11.4372	11.2308	12.0552	12.0642	12.2623	11.145	10.841	11.0182	10.732	10.66	11.0768
LE01Gene01691	0.925926	0.969431	0.933459	1.02395	0.951064	0.965351	1.14613	1.02867	1.08725	0.978736	0	1.0063	0	0	0	1.6413	0	0.99534
LE01Gene01692	9.82671	9.85564	10.3232	10.4883	10.2536	10.2753	10.323	10.3966	10.1904	10.3474	10.2099	10.1661	9.88154	10.2783	10.1565	9.91491	10.1272	10.3646
LE01Gene01693	8.73388	8.58221	8.71888	8.94223	8.99071	8.74699	8.49227	8.81821	9.0178	8.54972	8.51276	7.77407	8.56619	8.46659	8.46022	9.1763	8.73263	8.48254
LE01Gene01694	9.96563	10.205	10.7264	11.7151	11.2852	11.6359	11.6346	11.1475	11.6335	9.08394	8.85956	9.06512	11.1246	10.7115	10.0663	10.8477	10.7652	11.3717
LE01Gene01695	6.98853	7.196	7.48648	7.10245	6.77165	6.84931	6.29727	6.46552	6.61063	6.34999	6.66133	5.65619	6.2804	5.53676	6.29405	6.71223	6.73188	7.31265
LE01Gene01696	10.5008	10.277	10.5406	11.131	11.2263	11.1478	11.5302	11.0791	11.5043	10.4166	11.1364	11.0405	11.5744	12.4514	12.2338	11.2592	12.3828	11.9994
LE01Gene01697	10.5248	10.2613	10.4665	10.0987	9.94899	10.1695	10.1612	10.3421	10.1438	10.7418	10.6173	10.9374	10.3482	10.4783	10.8859	10.6928	10.243	10.4096
LE01Gene01700	12.4496	12.0646	12.4002	12.9915	12.8621	13.0924	12.7139	12.5925	12.5728	12.3508	12.2609	12.3351	12.8467	12.3113	12.4561	12.4973	12.0581	12.8128
LE01Gene01701	10.1654	9.99219	10.061	10.7514	10.6579	10.8884	10.5324	10.8357	10.604	9.87755	9.62082	9.36791	10.0928	9.7963	9.88745	10.183	10.3632	10.5971
LE01Gene01702	9.9552	10.3874	9.89036	10.306	10.094	10.0898	10.1474	10.0153	10.2083	9.61542	9.56134	9.21223	9.45504	9.41639	9.34815	10.0609	9.59123	10.1174
LE01Gene01703	11.8702	11.814	11.6703	11.1651	11.1572	11.1784	10.8456	11.0638	10.7086	11.6753	11.6604	11.59	10.9615	10.488	10.7669	10.9463	9.96761	10.8432
LE01Gene01704	13.2101	12.7864	12.6531	11.1176	11.6211	11.312	11.3251	11.3335	11.2721	12.8271	12.9374	13.0263	11.987	11.9697	11.7393	12.004	11.3317	11.2755
LE01Gene01705	12.0561	11.8159	11.7815	10.9415	11.2695	11.1265	10.8504	11.1899	10.8232	12.3572	12.406	12.6266	11.7051	11.6421	12.1831	11.9031	11.2048	10.9521
LE01Gene01706	10.4025	10.8414	10.1699	9.66032	9.38033	9.44958	9.42556	9.23908	9.46848	10.374	10.1178	9.6672	9.10401	9.19639	8.56624	9.18684	9.47188	9.50243
LE01Gene01707	10.1357	10.031	10.4126	10.8049	10.6957	10.9467	10.8466	11.0225	10.7355	10.0246	9.99646	10.1724	10.7418	10.6232	10.6099	10.5193	10.5086	10.8385
LE01Gene01708	12.234	12.0678	12.3118	12.0864	12.1976	11.9168	11.9626	12.2853	11.9256	11.7528	11.6203	11.5194	11.8918	11.6616	11.7717	11.587	11.4638	11.6937
LE01Gene01709	14.644	14.8077	14.7349	14.6253	14.2318	14.5078	13.7972	13.5469	13.9707	14.6118	14.5217	14.3443	14.3431	13.5604	14.0284	14.506	13.9335	14.1145
LE01Gene01710	9.73827	9.83611	10.188	10.4611	10.362	10.2664	10.3779	10.4693	10.2233	10.0644	9.95784	10.0322	10.0271	10.5664	10.1695	10.1711	10.5255	10.4755
LE01Gene01711	4.4981	5.14936	3.04942	3.95129	5.11265	6.06016	5.69916	5.48176	5.99961	4.28126	4.19735	4.09931	3.81765	3.53988	5.71825	6.05968	4.55841	5.63471
LE01Gene01712	9.96043	10.1956	10.1212	9.37836	9.37223	9.35202	9.27266	9.51409	9.28558	10.1605	10.1377	10.1289	9.26845	9.12826	9.1913	9.07789	9.37483	9.16311
LE01Gene01713	6.91513	7.56057	7.5923	6.7475	7.68878	6.73785	7.27682	7.72185	7.35826	7.48095	6.71525	7.34342	5.78849	6.78408	7.1232	5.63655	6.84406	6.74564
LE01Gene01716	8.77891	8.89543	8.27351	6.1966	7.00968	6.71186	6.79961	5.93848	5.94798	9.3581	9.2865	9.10267	7.02382	6.7194	7.45585	6.45776	7.1796	7.34827
LE01Gene01717	10.9367	10.6309	10.9088	11.2582	11.1496	11.5026	11.7284	11.3793	11.6427	11.954	11.9906	12.3446	12.788	12.7537	12.7782	12.2673	12.2058	12.5957
LE01Gene01718	11.0359	10.5721	11.0542	11.6723	11.5031	11.7165	11.9208	11.5581	11.7231	10.7893	10.8684	10.918	11.6962	11.2867	11.4593	11.304	11.0893	11.7683
LE01Gene01719	9.61455	9.27815	9.96974	10.2581	10.3362	10.4749	10.6827	10.8422	10.9227	11.3719	12.9333	12.6786	12.5854	13.8955	13.1895	12.4947	13.146	12.0828
LE01Gene01720	12.6048	12.275	12.2428	11.1521	11.6953	11.5097	11.036	11.762	11.4421	13.1098	13.674	13.7112	12.3083	12.3179	12.5691	11.7103	11.6705	12.4555
LE01Gene01721	13.208	13.0417	12.9848	12.7475	12.5613	12.819	12.7996	12.6344	12.7865	12.6366	12.6221	11.9496	11.773	12.2005	11.9544	12.8448	12.6767	12.5059
LE01Gene01722	8.95404	9.62127	9.42994	9.73746	9.45129	9.74691	9.83497	9.28069	9.88873	9.90118	9.59947	9.99983	9.5625	9.71236	9.7523	9.23584	9.70703	9.66487
LE01Gene01723	12.7432	13.3789	12.7921	11.951	12.1457	11.7906	11.7206	12.2214	11.6778	13.0113	12.6245	12.5529	11.8001	11.8911	12.1235	11.7697	12.275	12.1934
LE01Gene01724	1.48533	0	0	2.36006	0	0	4.659	0	3.14939	3.28342	0	0	2.9165	1.55232	0	0	0	0
LE01Gene01725	6.90433	6.06838	6.80738	4.90388	5.32907	5.78907	6.15714	5.41298	6.35716	6.68549	6.54704	5.14151	4.1573	5.2	6.04601	4.2491	5.45864	5.66327
LE01Gene01726	13.1389	12.6803	13.8257	16.7337	15.9645	16.5351	16.1861	15.106	16.0322	12.38	12.8055	13.2918	16.2803	15.5771	15.4145	15.1584	15.1939	16.6792
LE01Gene01727	16.2635	16.7376	16.1692	16.3703	16.3225	16.1073	16.0679	15.8532	16.1652	16.9165	16.6889	16.7026	16.1605	16.5001	16.1985	15.8857	16.6356	16.4806
LE01Gene01728	10.2219	10.205	10.7752	11.4564	11.1625	11.6155	11.0427	10.32	11.4286	10.4012	11.6634	11.0245	12.4903	13.063	11.9622	11.567	12.6285	12.3053
LE01Gene01729	11.3307	11.0649	9.72649	7.17646	7.53029	7.38969	7.4369	7.32321	7.15695	14.3827	13.6393	13.8343	9.38004	9.33669	9.67238	8.91324	10.0163	8.37871
LE01Gene01730	12.8987	12.5349	12.555	12.8466	12.7092	12.8201	12.8567	13.0451	12.9044	12.4824	12.7174	12.7635	12.4648	12.6985	12.6371	12.9566	12.6487	13.0246
LE01Gene01731	12.318	12.03	12.4104	13.4067	13.356	13.4096	13.536	13.6066	13.3383	11.6585	11.7189	11.7108	12.4643	12.7551	12.4564	12.2934	12.7269	12.7495
LE01Gene01732	11.1961	10.9826	11.0902	11.5192	11.4357	11.5469	11.2552	11.2429	11.4144	11.0903	11.0603	11.4017	11.728	11.4341	11.954	11.3965	11.114	11.4496
LE01Gene01733	11.5401	11.2334	11.1578	10.4643	10.6851	10.5565	10.4783	10.7415	10.5777	11.528	11.5723	11.7578	11.0741	11.0658	11.8541	11.1403	11.0006	10.9565
LE01Gene01734	16.9408	17.1081	17.2774	17.5306	17.3698	17.355	17.7231	17.1676	17.6989	16.3172	16.2734	16.1499	16.7382	16.7878	16.7204	16.9809	17.2604	17.1959
LE01Gene01735	14.8931	14.8426	14.4786	12.8089	13.3662	13.0188	12.6549	13.5489	12.9692	15.1178	15.1849	14.871	13.5903	13.6861	13.7143	13.141	13.2371	12.849
LE01Gene01736	9.92347	9.616	9.47859	10.4832	10.4328	10.4998	10.6869	10.8455	11.0007	10.2051	9.9239	9.93441	10.417	10.9338	11.0096	11.0723	11.4378	10.8354
LE01Gene01737	9.50089	9.62653	9.4638	10.8132	10.5676	10.7469	10.9581	10.6687	11.029	8.96847	9.16097	9.35241	10.4482	10.3707	10.3436	10.7311	10.893	10.8657
LE01Gene01738	13.2664	12.8971	12.5107	11.8378	11.8795	11.9595	11.7289	11.9516	11.8699	13.3733	13.4678	13.367	12.6536	12.185	12.527	12.7171	12.0508	11.8687
LE01Gene01739	10.1766	10.2748	9.86384	8.34657	8.26267	8.39766	7.63481	6.90179	7.36811	10.4339	10.0862	10.2852	8.10907	7.97885	7.78798	7.34995	7.05692	6.67726
LE01Gene01740	11.672	11.6964	11.4416	10.51	10.6924	10.1197	10.3325	10.8495	10.3727	11.5659	11.7735	11.7595	10.5651	9.86519	10.5041	10.797	9.56487	9.7203
LE01Gene01741	11.5544	11.445	11.7349	11.874	11.799	11.8647	12.1168	12.0694	11.9776	11.6145	11.54	11.56	11.7087	11.7974	12.0541	12.0984	12.2273	12.1077
LE01Gene01742	7.35652	7.56057	7.70353	8.1971	8.12476	8.07476	8.52114	8.68964	8.93734	10.6619	12.1995	12.1486	12.2721	14.2264	13.6286	12.2567	14.3743	13.3333
LE01Gene01743	13.1164	12.7813	12.9333	12.3114	12.4109	12.2871	12.1834	12.4917	12.0958	12.8899	13.1148	13.1633	12.6246	12.325	12.7909	12.8479	12.07	12.2038
LE01Gene01744	10.8855	11.088	11.1358	12.7529	12.389	12.3842	12.5121	12.3611	12.166	9.54217	9.65053	9.53808	11.0872	10.7876	10.7445	10.7066	10.996	10.7932
LE01Gene01745	11.6247	11.9459	11.4986	10.6759	10.9061	10.6059	10.8598	11.0168	10.7804	11.814	11.4334	11.175	10.4873	10.9876	10.9811	10.9377	11.0179	10.8307
LE01Gene01746	10.6178	10.1489	10.5193	10.8403	10.7134	10.58	10.6362	10.6742	10.5682	10.5002	10.525	10.5652	10.875	10.6863	10.6241	11.0977	10.8441	10.5221
LE01Gene01747	11.1018	10.9112	10.8924	9.87401	10.0566	9.83381	9.90602	10.0763	9.92757	10.9157	10.8662	10.8674	9.98906	9.5747	9.92626	9.93692	9.36781	9.63273
LE01Gene01748	6.60421	6.02659	7.07412	6.71948	6.93462	7.32259	6.48483	6.98707	6.88225	5.44997	5.83013	6.35228	7.09467	7.52087	7.10166	6.86432	7.37901	7.27613
LE01Gene01749	7.83147	7.06793	8.03412	8.33277	8.35603	8.68824	7.72856	7.70036	8.61201	7.37526	7.34776	8.15209	11.1797	10.8072	9.93998	10.2845	10.0591	9.34603
LE01Gene01750	13.0361	12.9162	12.6151	12.1899	12.4362	12.447	12.2706	12.5203	12.5599	13.0966	13.406	13.4209	12.8268	12.5558	12.9376	13.1373	12.368	12.6905
LE01Gene01751	13.3037	13.1015	12.7757	12.1609	12.4015	12.3046	12.1579	12.3288	12.2063	13.0787	12.8662	12.7756	12.3165	11.8346	11.9232	12.4641	11.9348	11.9313
LE01Gene01752	9.95259	10.3349	10.2953	10.0276	10.1269	9.99061	10.0875	9.86085	9.79868	10.2134	10.3206	10.2922	9.74348	9.60007	10.1669	9.85674	9.87655	9.73046
LE01Gene01753	5.78121	5.86997	6.03561	6.81527	6.25922	6.37362	6.40446	5.91381	5.89443	5.93512	5.99178	4.96637	5.78849	5.56648	5.43795	4.7243	5.9091	5.74573
LE01Gene01754	10.4111	9.16231	10.3243	11.3672	10.8171	11.1937	11.5431	9.57438	11.5488	8.99341	10.4142	10.3243	10.5032	10.9564	10.2103	11.9436	11.5155	10.7555
LE01Gene01755	10.5648	9.30462	10.7886	11.7928	11.2536	11.6264	12.0925	10.8381	12.127	10.0486	11.3319	11.0301	11.2063	11.8892	10.4803	12.4787	12.5573	10.8053
LE01Gene01767	8.03822	7.39799	7.91409	9.84998	9.18135	9.54833	10.0778	8.52423	9.75428	7.79655	8.57241	8.39192	9.25746	9.6889	8.83452	9.94934	10.0576	9.32384
LE01Gene01768	9.78758	9.14776	10.04	11.8115	11.1864	11.7392	11.7865	10.5978	11.7699	8.61904	9.82926	9.62174	10.9224	11.1138	10.5525	11.5865	11.3425	11.5191
LE01Gene01769	10.6136	10.6317	10.7264	11.5039	11.0603	11.2764	11.8111	11.0596	12.0169	10.9258	11.0584	11.0055	11.3636	11.9462	11.5169	11.2839	11.8721	12.0429
LE01Gene01770	11.7332	11.7798	11.4265	10.5141	10.7357	10.5073	10.4498	10.6285	10.5904	11.7734	11.9022	11.7874	11.0328	11.2704	11.3205	10.8642	11.0216	10.7194
LE01Gene01773	12.0555	12.0303	12.1811	12.0953	12.5261	12.2092	11.9753	12.6034	12.002	12.9904	13.1683	13.7067	13.3027	13.4186	13.6443	13.4808	13.3464	12.9998
LE01Gene01774	13.1502	12.8197	12.4367	11.5449	11.5587	11.5158	10.8887	11.5411	11.065	13.3812	13.5768	13.3916	12.208	12.0573	12.5698	12.588	12.2918	11.5211
LE01Gene01775	12.8111	13.1913	12.9464	12.4548	12.4793	12.3511	12.1694	12.2877	12.1988	12.9883	12.8385	12.7735	12.1354	12.2304	12.2479	12.0328	12.6039	12.5508
LE01Gene01776	10.4225	10.3476	10.3283	10.187	10.1555	9.87244	10.2458	10.1731	10.2435	10.1483	9.91816	10.2522	10.1258	10.0684	10.0282	10.2334	9.93155	9.89154
LE01Gene01777	10.6784	10.7829	10.3646	10.0891	10.3194	10.1442	10.5253	10.5566	10.2274	10.8716	10.8647	10.8814	10.321	10.7362	10.8532	10.5183	10.6847	10.4532
LE01Gene01778	10.0647	10.4058	10.3746	10.3049	10.4957	10.4806	10.3514	10.4893	10.6258	9.86259	9.81853	9.56139	9.69381	9.87116	9.55644	10.3563	10.0445	9.6273
LE01Gene01779	12.262	12.2596	11.982	11.0775	11.0995	11.1436	10.5372	10.9689	10.7317	12.4863	12.716	12.5474	11.5413	11.8246	11.3453	11.0695	11.5578	11.3499
LE01Gene01780	14.946	15.369	14.9381	13.5838	13.6863	13.4276	13.0503	13.353	13.0426	15.2456	14.9704	14.9141	13.5169	13.5522	13.8428	13.7444	13.9988	13.5753
LE01Gene01781	3.56057	0	3.46053	2.84818	0	4.18156	3.57515	2.63244	0	5.00287	3.41093	5.14151	4.36809	3.41473	5.85326	5.25136	5.1004	3.99125
LE01Gene01782	9.4217	9.63698	9.39722	9.36937	9.19289	9.29628	9.67289	9.35819	9.26463	12.9543	12.7006	14.6224	12.3893	12.3116	15.0492	13.0153	12.4742	12.4148
LE01Gene01783	10.7779	10.9134	10.882	11.4441	11.1513	11.2858	11.6918	11.257	11.3947	10.5965	10.4964	10.8447	11.0296	10.9821	10.9461	11.021	10.9529	10.7908
LE01Gene01784	11.4859	11.5119	11.5629	11.723	11.5627	11.758	11.7196	11.4442	11.78	11.2087	11.1039	11.1781	11.4155	11.4885	11.1572	11.7329	11.661	11.2743
LE01Gene01785	9.91004	9.58933	9.71404	9.69671	9.91453	10.0961	9.73377	9.84951	9.74675	10.1884	10.3389	10.8814	10.6516	10.3771	10.4336	10.5318	9.94891	10.3171
LE01Gene01786	12.2117	11.913	11.9736	11.675	11.6373	11.7112	11.4973	11.7033	11.5842	13.1148	13.0919	13.7426	12.9458	12.726	13.1284	13.3543	12.9392	11.9722
LE01Gene01787	10.1822	10.6369	10.5049	10.1455	10.0629	10.0384	9.90602	9.45117	10.0443	9.89678	10.1253	9.789	9.70518	10.1381	9.49167	9.82675	10.2133	9.74055
LE01Gene01788	11.469	11.5658	11.3298	10.8305	10.882	10.8285	10.7091	11.1349	10.7851	11.6131	11.3849	11.339	10.8445	10.6036	11.2574	11.0444	10.5203	10.8741
LE01Gene01789	12.0955	12.2758	11.7574	10.4182	10.5289	10.0358	9.86531	10.5274	10.2857	12.2443	11.9235	11.9191	10.3921	9.94374	9.74884	10.2979	10.0907	9.76217
LE01Gene01790	10.6761	10.7648	10.5494	9.29061	9.43388	9.40771	8.36533	9.25882	9.19436	10.443	10.5428	10.3569	8.61521	8.39384	8.82798	8.28799	7.78954	7.64176
LE01Gene01791	11.1269	11.1281	10.8722	10.7093	10.7357	10.5917	10.5014	10.4735	10.5628	11.1962	11.1327	11.136	10.7387	10.4225	11.0396	10.401	10.3761	10.7049
LE01Gene01792	5.13735	6.08884	5.91026	4.90388	3.90684	5.14124	3.95961	5.69953	5.07108	5.51267	5.15749	5.68476	3.61221	4.20131	0	0	4.00374	3.99125
LE01Gene01796	9.4198	9.48711	9.35775	8.70918	8.45143	8.52249	8.26649	8.30453	7.94358	8.55346	8.23676	8.32995	8.42407	8.33461	7.8147	8.21269	7.85126	8.18052
LE01Gene01797	10.9113	10.3956	10.7171	11.6362	10.7631	11.4873	11.4112	10.3977	11.2173	9.80739	10.2447	10.393	11.4707	10.7533	10.6651	10.9502	10.4861	11.4138
LE01Gene01798	9.06	9.60184	9.22147	11.0919	10.5729	10.8848	11.0739	10.2166	10.6792	9.15199	8.76367	8.93142	10.2035	10.1784	9.81486	9.61302	10.3514	10.8314
LE01Gene01799	11.8309	11.7993	12.1486	12.2124	12.1806	12.245	12.7287	12.2323	12.4207	12.426	12.1001	12.3438	12.6105	13.0289	12.5999	13.3449	13.6158	12.7847
LE01Gene01800	12.8851	12.5059	12.5537	13.1797	12.5797	12.7522	13.8918	12.8954	13.1677	13.2695	13.0898	12.8579	12.6139	12.8117	12.2144	12.7557	12.7304	12.6531
LE01Gene01801	9.96693	10.5803	10.0938	9.27385	9.7207	9.49409	9.22666	9.63414	9.15505	10.1284	9.77951	9.76411	8.90998	8.89043	9.36407	8.35022	8.69946	9.04325
LE01Gene01802	11.0982	11.0559	11.0944	10.131	10.2348	10.5252	10.0794	10.3651	10.2935	11.1525	11.1327	11.3463	10.3596	10.3028	10.5335	9.995	9.9188	10.4583
LE01Gene01803	7.06809	7.21473	7.08383	7.69114	7.28473	7.40599	6.9056	7.59565	7.76862	6.22451	7.1661	6.52024	7.612	8.0224	8.10183	8.64954	7.36026	8.28071
LE01Gene01804	14.7295	14.483	14.6763	14.6879	14.2416	14.484	13.6407	13.6473	13.9128	14.6641	14.5797	14.3959	14.2905	13.384	13.8933	14.3139	13.5224	13.8888
LE01Gene01805	13.3134	13.4444	13.3532	13.0216	13.1897	13.0008	13.0276	13.0502	13.175	13.5259	13.48	13.653	13.0607	13.2219	13.4787	13.2298	13.2591	13.302
LE01Gene01806	8.85938	8.94395	9.65177	10.6741	11.5913	11.1253	11.4022	12.0722	11.7169	7.40035	7.06589	7.03485	9.88726	10.6872	10.846	10.2623	11.1272	10.763
LE01Gene01807	11.6597	12.0425	11.8854	10.4622	11.2928	10.6103	10.374	10.9233	10.1279	12.0443	11.7715	11.6846	10.383	9.98285	10.163	9.7701	9.98147	9.98078
LE01Gene01808	11.9613	12.1342	11.4019	10.2149	10.476	10.2897	8.91116	9.78464	9.49346	12.4642	12.357	12.5554	12.2193	11.7374	11.7013	10.6724	10.7935	10.9376
LE01Gene01810	7.9777	8.82403	8.12156	7.6546	8.47054	7.40599	7.52506	9.17043	6.76779	7.56471	6.88952	7.52821	7.10451	7.59486	9.44754	7.63785	7.22175	7.21955
LE01Gene01811	5.68354	6.12889	6.6594	5.43872	5.98939	6.51556	6.31935	6.72867	6.35716	5.24367	6.35659	5.47173	4.49325	6.06	6.11213	5.83708	5.68641	5.48273
LE01Gene01812	11.0833	10.9083	10.8532	10.4452	10.7334	10.4097	10.374	10.7821	10.397	11.2547	11.58	11.6456	10.8342	10.4967	11.0009	11.0458	10.5619	10.2074
LE01Gene01813	10.9759	10.6062	10.9466	11.0126	11.1196	11.1048	11.0344	11.3017	11.198	10.3125	10.1718	10.3624	10.9411	10.7501	10.8223	10.9777	10.5792	11.1493
LE01Gene01814	10.716	10.5621	10.7662	8.82877	9.19749	8.95236	8.32769	8.81154	7.95671	10.7012	10.4896	10.4006	8.29248	7.86982	8.42596	8.45414	7.64215	6.73222
LE01Gene01815	10.2132	10.027	10.0388	8.75131	9.17902	8.89	8.67037	9.35132	8.94065	10.3441	10.2157	10.0692	9.30945	9.26371	9.82475	9.35269	8.85484	8.9155
LE01Gene01816	11.3063	11.7118	11.0324	10.3131	10.5022	10.2973	10.3257	10.7459	10.5226	12.0356	11.796	11.8155	11.0341	11.2362	11.2749	10.846	11.3383	10.8541
LE01Gene01817	8.77891	8.54569	8.48245	9.03042	9.12217	9.29409	9.14554	8.2365	9.22451	7.88215	8.57969	8.12106	8.2532	8.70576	7.95942	8.53055	8.26305	8.7152
LE01Gene01818	11.537	10.9417	12.2366	13.0091	12.8137	13.1999	13.117	12.448	13.2756	11.7175	11.9328	12.473	12.3318	13.1731	12.3304	12.8591	13.761	12.4001
LE01Gene01819	10.4782	10.3046	10.6943	11.125	10.6554	10.6697	11.0032	10.5486	10.9168	10.6842	10.5391	10.927	11.0009	10.7362	11.1695	10.6449	10.7509	10.781
LE01Gene01820	9.37358	9.23062	9.10711	8.52716	8.29303	8.16371	8.38117	8.44894	8.31362	9.83218	10.185	10.4842	9.27718	9.14805	9.607	9.23076	9.18283	8.47853
LE01Gene01821	9.07933	9.30462	8.9111	8.69486	9.0427	8.96065	8.90752	8.96956	8.82734	9.27011	9.4244	9.23173	9.2081	9.35597	9.34815	9.53273	9.29318	8.75556
LE01Gene01822	0	0	0	2.03578	0	2.26608	0	0	3.61434	0	0	0	3.71858	0	2.8475	0	0	0
LE01Gene01823	9.31974	9.26248	9.40111	10.8419	10.5407	10.6381	10.8275	10.9209	10.9888	8.68177	8.57969	8.32088	10.225	9.90936	9.30639	10.4101	10.1091	9.80125
LE01Gene01824	12.3302	11.9823	11.9601	12.0097	11.904	12.0777	12.029	12.1073	11.8178	12.5568	12.7467	12.9564	12.4795	12.6009	12.591	12.5021	12.5001	12.0698
LE01Gene01825	11.5221	11.443	11.4706	11.3829	11.3361	11.3195	11.5595	11.5993	11.497	11.6881	11.6914	11.8395	11.7509	11.5609	12.019	11.9264	11.4577	11.9225
LE01Gene01826	7.03876	8.35201	10.9892	9.15857	11.4372	8.86073	8.37591	9.43391	8.48644	5.79081	4.94826	6.48817	6.78765	7.62342	5.95285	6.75532	7.24237	13.2332
LE01Gene01827	13.1465	12.9512	13.3484	13.6794	13.618	13.5923	13.5619	13.6387	13.453	13.0371	12.9118	13.0048	13.4368	12.9705	13.4562	13.2301	12.7959	13.3738
LE01Gene01828	11.4277	11.3208	11.1549	10.6069	10.6018	10.6873	10.6784	10.6797	10.8223	11.3538	11.7148	11.3898	11.2683	11.4128	11.2365	11.0451	11.1126	10.8802
LE01Gene01829	11.3377	11.6931	11.5806	11.778	11.6649	11.5992	11.5027	11.5631	11.5884	11.7175	11.6981	11.5652	11.6033	11.5446	11.8091	11.4614	12.0017	11.9715
LE01Gene01830	10.5397	10.2062	10.5327	10.3604	10.6753	10.7429	10.5675	10.8896	10.6752	10.5636	10.6146	10.7113	10.6549	10.5774	10.5515	10.915	10.9116	10.1238
LE01Gene01831	14.7117	15.2162	14.5822	14.0911	14.1394	14.0978	14.1204	14.1029	14.0852	15.0157	14.6692	14.5779	13.6668	13.856	13.635	13.6663	14.17	14.1116
LE01Gene01832	12.7732	13.1235	13.2706	12.9307	13.0133	12.7216	12.4888	13.0518	12.2067	12.0919	12.0482	12.0228	11.7853	11.522	11.4021	11.1116	11.3317	11.1971
LE01Gene01833	13.6033	13.6551	13.1105	11.8784	11.8532	11.8602	11.6051	11.6166	11.7929	13.6661	13.7097	13.5543	12.259	12.0366	12.1325	12.032	11.6781	11.9151
LE01Gene01834	12.7115	12.35	12.3843	11.7008	11.8731	11.7624	11.5272	11.6811	11.6098	12.5865	12.8705	13.2477	12.5383	11.9327	12.7319	11.9413	11.4073	11.8216
LE01Gene01835	9.70288	9.37916	9.32129	8.88976	9.11004	8.90727	8.85934	8.85432	8.58269	10.0246	9.93388	10.5004	10.0817	9.70403	10.4196	10.004	9.13124	9.47248
LE01Gene01836	3.66661	4.33352	4.26281	2.84818	2.24281	3.74233	5.2248	4.30178	2.45911	3.42053	2.95335	4.47144	3.71858	2.957	4.36635	4.53943	4.42045	5.51443
LE01Gene01837	12.2504	12.4028	12.2469	11.3541	11.3827	11.312	11.1382	11.4	11.2871	13.0398	12.9235	13.2121	12.0779	12.1254	12.6781	12.4939	12.3374	11.8745
LE01Gene01838	11.8277	11.3305	11.4231	11.1296	11.2397	11.2614	11.1131	11.2982	11.1403	11.6902	11.7114	11.7221	11.1977	11.1207	11.3234	11.2852	10.8022	10.7679
LE01Gene01839	7.08731	7.83328	6.79561	7.67663	7.77736	8.22929	8.28905	7.89575	7.89669	6.7649	5.96977	6.56704	6.38101	7.40225	6.73278	7.2124	7.50382	6.97942
LE01Gene01840	11.5792	11.754	11.4936	11.2697	11.313	11.0643	10.9791	11.2515	10.9984	11.6225	11.4564	11.1737	10.6708	11.0209	10.9611	11.0709	11.4181	10.9708
LE01Gene01841	8.07238	8.02589	8.04907	7.5471	7.64236	8.08492	7.12209	7.58005	7.56946	8.69197	7.86565	8.37886	8.39228	8.60551	8.29924	8.61095	8.4161	8.49452
LE01Gene01842	8.77595	9.04684	9.07096	11.5602	10.904	11.8928	11.9026	10.4735	12.3881	8.9989	9.59589	10.1431	12.204	12.9291	12.9043	13.3239	13.1026	12.8781
LE01Gene01843	9.01804	8.82403	9.06116	9.80402	9.20891	9.14672	9.3711	8.77433	10.0335	8.15206	8.05005	8.29331	8.03894	8.45868	8.58963	9.25097	8.67691	8.30358
LE01Gene01844	11.2914	11.0816	11.9888	12.4182	12.5366	12.9514	12.3562	11.9756	13.5508	11.5529	11.6779	11.7494	13.354	13.9466	14.6108	13.9611	14.0756	13.9522
LE01Gene01845	11.4394	11.23	11.241	10.4323	10.6949	10.3749	10.3023	10.6445	10.2301	11.4283	11.4578	11.0793	10.2519	10.1419	10.0883	10.2257	9.97533	9.87637
LE01Gene01846	12.5067	12.4286	12.2558	10.5769	10.9131	10.376	10.3567	10.8033	10.0717	12.5714	12.2366	11.9784	10.5749	9.92378	9.93237	10.3886	9.92519	9.25981
LE01Gene01847	11.3577	11.2919	11.6545	11.2149	11.616	11.4021	11.2815	11.976	11.3255	10.8879	10.8803	10.9733	11.2716	11.1511	11.5796	11.2467	11.2532	11.1461
LE01Gene01849	8.13837	8.03119	8.34792	8.40492	8.31434	7.96904	8.9993	8.18071	9.02093	9.37718	9.27532	8.55558	8.72775	8.73877	8.30867	8.65334	8.61501	8.22432
LE01Gene01850	10.413	10.2624	10.2323	9.57493	9.76625	9.45742	9.15171	9.36048	8.89707	10.3257	10.3708	10.1431	8.68902	7.88759	7.63145	8.34082	8.5951	8.82989
LE01Gene01851	9.40072	9.23751	9.15395	8.80229	8.84313	8.48079	8.81339	8.79475	8.88339	8.98238	8.98832	9.20732	8.65259	8.56927	9.15778	8.73455	8.22211	8.69113
LE01Gene01854	5.27783	4.4005	4.8225	3.95129	3.36918	3.84152	5.31549	4.30178	4.55421	4.71365	4.19735	4.87013	3.81765	4.20131	4.79991	4.32734	3.90373	4.38343
LE01Gene01855	10.5536	10.3915	10.3304	11.2727	11.007	11.1011	11.3087	11.024	11.1835	10.4983	10.6366	10.7874	11.264	11.1081	11.4026	11.3731	11.1355	11.6386
LE01Gene01856	11.7484	11.6443	11.4844	10.8411	10.7514	10.8621	10.3923	10.8125	10.6319	11.9712	11.9188	12.0723	11.383	10.9238	11.2104	11.5167	10.6978	10.7646
LE01Gene01857	9.91543	9.86308	10.0363	10.9656	10.5711	10.6772	11.1147	10.5325	10.9418	9.72042	9.46431	9.70779	11.136	11.4056	11.2415	11.5204	11.6719	10.9586
LE01Gene01858	6.03986	6.99396	5.42133	6.27571	4.15375	4.18156	4.85316	5.26473	5.59207	6.6158	6.42291	6.42182	6.1343	5.88231	5.43795	6.55852	5.7162	5.03534
LE01Gene01859	10.6432	10.5893	10.5415	10.5779	10.3823	10.5446	10.2715	10.4165	10.4992	10.5728	10.5278	10.7251	10.7738	10.5225	10.7789	10.9838	10.3923	10.6842
LE01Gene01860	8.84251	8.87791	8.89188	9.85159	9.64031	9.98384	9.85779	9.79819	9.89896	8.51186	8.59775	8.47607	9.41803	9.13323	9.49787	9.08916	9.08632	9.55101
LE01Gene01861	9.3677	9.616	9.20377	7.90529	7.86661	8.18275	7.74498	7.85095	7.30794	9.24724	8.97733	9.21957	7.11429	7.65143	7.38629	7.31197	8.04564	7.69115
LE01Gene01862	9.2404	9.45399	9.16771	7.66933	6.91244	7.35653	7.42676	6.54802	7.03852	10.224	10.7418	10.0446	8.24877	8.62683	8.13402	7.71991	8.05149	8.34384
LE01Gene01863	8.34414	8.64571	8.87521	7.21711	5.92436	7.31398	6.40446	5.83713	6.84038	7.86423	8.18992	7.98981	7.71839	8.80573	7.76075	5.94027	7.70293	6.54535
LE01Gene01864	9.45723	9.83308	10.4117	8.99286	8.47811	9.51303	9.10479	8.26117	9.43136	9.36873	9.58144	9.35686	9.24861	10.0749	9.0153	8.70554	9.51489	8.83931
LE01Gene01865	8.14297	8.08817	8.48245	8.31883	8.23612	8.86663	8.60893	8.19614	8.89025	8.88206	9.20875	9.02098	8.63572	9.69564	9.92166	9.10313	8.95818	8.55293
LE01Gene01866	6.54982	6.56819	6.71043	7.03583	6.29395	7.25223	6.96284	6.71445	7.40687	7.70555	7.05548	7.52821	7.6728	7.35193	7.00055	6.5422	6.8708	7.20018
LE01Gene01867	11.1794	10.6923	10.5406	10.2361	10.1508	10.0618	10.1146	10.2229	10.0273	10.7467	11.1203	11.1937	10.5116	9.94515	10.4454	10.3528	9.78991	10.3327
LE01Gene01868	10.8779	10.8383	10.6419	10.3795	10.3486	10.3049	10.3554	10.4661	10.1931	10.44	10.0707	10.0432	9.89153	9.7107	10.2803	10.0494	9.98147	10.1568
LE01Gene01869	8.17027	7.96081	8.54001	9.8756	9.42803	9.66971	9.43823	9.50172	9.59556	7.79024	7.92977	7.84542	9.59777	9.02231	9.25366	9.16835	9.13951	9.83303
LE01Gene01870	7.78513	7.7329	7.90864	10.1203	9.8044	10.0566	9.73377	9.1038	9.35908	7.63685	6.59096	7.60497	9.39616	9.36022	9.49787	9.37358	9.13676	10.2551
LE01Gene01871	10.5928	10.377	10.1665	9.06423	9.35588	9.17314	8.75382	8.58802	8.74275	10.702	10.7081	10.8135	9.19894	9.16273	9.60317	9.20767	8.88138	8.45012
LE01Gene01872	13.1435	13.5132	13.0031	12.0172	12.3222	11.9139	11.9835	12.341	11.9439	13.4264	13.1402	13.2067	12.1426	12.252	12.4601	12.1373	12.4627	12.2383
LE01Gene01873	10.7183	10.2636	11.701	12.8032	11.9314	12.61	11.923	10.5446	12.1309	9.40843	10.1838	10.3118	12.1312	12.7974	11.4385	11.8494	12.9161	13.0429
LE01Gene01874	7.35652	7.3049	7.23089	8.1869	7.48591	7.93575	8.42766	8.07338	7.81258	6.64408	6.95821	6.52024	7.68598	7.69918	7.83442	7.9721	7.31231	8.43364
LE01Gene01875	9.11723	8.9936	8.88634	8.43539	8.52272	8.89	8.67893	8.61123	8.57845	9.21461	9.1922	9.22201	9.11135	8.41033	8.70125	8.38265	8.09749	8.60171
LE01Gene01876	11.1783	11.1144	10.9204	10.6493	10.9926	10.7501	10.9422	11.0383	10.745	10.6028	10.3346	10.7549	10.8089	10.7892	11.0635	10.7867	10.5761	10.7347
LE01Gene01881	12.9121	13.0787	13.0723	11.8309	12.1457	11.8599	11.8347	12.0077	11.9776	13.0224	12.6529	12.8828	12.1161	12.0485	12.1255	12.032	11.9976	12.0089
LE01Gene01882	10.415	10.3561	10.1058	11.7944	9.8835	9.185	12.9653	10.8912	11.5363	10.6314	10.5493	10.5566	9.41803	9.44067	9.1913	9.46512	9.30548	12.3154
LE01Gene01883	6.0788	6.63925	6.55159	6.85445	6.66954	6.61705	6.78381	7.82471	6.98829	5.65843	6.19521	6.40475	5.78849	6.08075	5.25493	4.47214	6.77497	5.03534
LE01Gene01884	11.0084	10.8756	10.9346	10.8484	10.9726	10.6295	10.6062	10.8381	10.6802	10.5691	10.2262	9.74049	10.5299	10.5919	10.3539	10.8918	10.8567	10.671
LE01Gene01885	14.5222	14.9838	14.6068	13.4077	13.6251	13.3945	12.9228	13.4421	12.9103	14.6623	14.4075	14.3773	13.2274	13.1911	13.3142	12.9229	13.4514	13.2954
LE01Gene01886	9.99519	10.1256	10.5067	10.7754	10.9407	10.4652	10.7112	10.771	10.0778	9.98648	9.62611	10.6003	10.783	11.0289	11.0268	10.617	11.6729	10.6911
LE01Gene01887	10.92	10.9536	10.8903	11.3306	11.2602	11.3065	11.5337	11.195	11.33	11.0565	10.948	11.3243	11.4521	11.6174	11.473	11.392	11.6088	11.3905
LE01Gene01888	8.8283	8.94114	9.29227	10.4039	9.85616	10.2107	9.94915	9.05386	9.78954	8.06584	8.04479	8.59375	9.82015	9.74847	8.88583	8.97834	9.74184	10.3711
LE01Gene01889	9.37358	9.53633	9.73883	9.65293	9.9408	9.75011	9.74809	9.87371	9.83111	9.53841	9.46431	10.0322	9.5714	10.2141	10.31	10.0378	10.7365	9.91697
LE01Gene01890	9.5116	9.14532	9.79163	10.4769	10.3372	10.3093	10.6752	9.99484	10.5531	9.44505	9.33896	9.23415	10.5687	10.7493	10.5839	10.8813	10.6494	10.9521
LE01Gene01891	11.3641	11.0816	11.3314	11.7097	11.59	11.7496	11.7741	11.6506	11.7947	10.8745	10.9923	11.1856	11.8419	11.6134	11.8621	11.7334	11.5938	12.0574
LE01Gene01892	12.1899	12.1197	11.9439	10.5313	10.8223	10.6476	10.0697	10.8389	10.3418	12.1784	12.0002	11.6681	10.2585	9.905	9.79654	10.0878	9.57709	9.68938
LE01Gene01893	12.3574	12.1022	12.0084	11.4653	11.7549	11.6032	11.448	12.0062	11.5863	12.2726	12.356	12.3365	12.1315	11.7721	12.0597	12.0458	11.7141	11.5733
LE01Gene01894	10.8151	10.8844	10.6303	9.63242	10.2481	9.82626	10.0484	10.5636	9.92423	10.9802	10.8185	10.5064	10.1792	9.88006	10.1695	10.1101	9.74545	9.65601
LE01Gene01895	11.39	11.6969	11.629	11.0126	11.6385	11.1085	11.2801	12.0029	11.2767	11.9957	11.7987	11.9959	11.5345	11.7581	12.2973	11.7495	11.845	11.2979
LE01Gene01896	6.44941	7.31362	6.73529	5.80154	6.50138	5.45497	5.73246	6.1645	4.80697	8.07105	9.43849	9.0624	9.00763	10.3968	9.57609	8.66468	10.3644	9.0296
LE01Gene01897	14.3467	14.3535	14.1458	13.4774	13.5088	13.4009	13.3556	13.2485	13.6725	14.2688	14.2215	14.0977	13.0143	13.4439	13.2263	13.7113	14.0304	13.4332
LE01Gene01898	14.3	13.8224	13.6995	12.8784	12.792	12.8115	12.7302	12.6839	12.8673	14.3673	14.7041	14.6196	13.5753	13.2104	13.5363	13.7479	13.0239	12.945
LE01Gene01899	12.6646	12.6339	12.7266	12.2984	12.3716	12.3451	12.3286	12.3508	12.3357	12.7412	12.7909	12.8744	12.574	12.2895	12.8147	12.5645	12.3029	12.459
LE01Gene01900	9.89512	9.81325	9.80196	10.6714	10.4319	10.6303	10.3243	10.5305	10.3229	9.94872	10.0551	9.95655	11.127	10.7581	10.5071	10.5765	10.3772	10.6728
LE01Gene01901	12.7294	12.7039	12.6232	13.455	13.5985	13.6026	13.9109	13.7868	14.1625	12.5263	12.5585	12.691	13.4128	13.7896	13.593	13.9745	13.9877	13.9546
LE01Gene01902	14.5595	15.0177	14.6152	15.0762	15.065	14.9059	15.0747	14.8409	15.2003	14.4494	14.2653	14.354	14.3601	14.7477	14.4088	14.6127	15.0618	14.8087
LE01Gene01903	11.4445	11.6725	11.7302	10.9408	10.9407	11.0193	10.7391	10.3514	10.7412	11.4156	11.1796	10.8706	10.8836	10.6581	10.391	10.0808	10.4209	10.6989
LE01Gene01904	6.18967	5.46313	6.90918	9.11082	8.65219	8.74699	9.14863	8.6787	8.72752	5.44997	6.43902	7.83907	8.93226	8.9224	10.3205	8.45849	8.75074	9.205
LE01Gene01905	1.88741	3.94214	0	7.19693	5.7096	6.45419	7.66961	6.74275	6.54264	4.20737	5.83013	6.78065	6.38101	7.21786	8.84752	6.44026	7.08002	6.67726
LE01Gene01906	8.5452	9.28702	8.82688	8.99286	8.682	8.84588	8.76995	8.40534	8.75031	8.29268	8.20413	7.27929	8.36388	8.34751	7.97727	7.96599	8.3416	8.74223
LE01Gene01907	9.64244	9.69316	9.73576	12.5777	11.5591	12.3065	12.4071	11.2844	12.3911	9.34308	9.44249	9.82474	12.0025	11.6045	11.2641	12.6649	11.5176	11.7355
LE01Gene01908	10.9407	10.8489	10.7893	11.8124	11.491	11.6501	11.7045	11.4924	11.5505	10.3474	10.3791	10.5928	11.3971	10.7654	10.9263	11.0379	10.7328	11.3765
LE01Gene01909	10.4357	10.1779	10.3099	11.2901	10.9813	11.2541	11.7325	11.186	11.4368	9.89678	9.82773	10.4273	11.4346	11.6564	11.4455	11.3897	11.6653	11.477
LE01Gene01910	9.21003	9.63002	9.50232	9.78724	9.56409	9.7848	10.1051	9.62086	9.8663	9.29261	9.22277	9.35907	9.79453	9.64778	9.46662	9.54096	9.86663	9.98361
LE01Gene01911	11.23	11.1477	11.6683	10.8645	11.2302	10.9418	11.1644	11.482	11.1694	11.297	11.2435	11.082	11.3554	11.1387	11.1215	11.2058	10.8906	11.0019
LE01Gene01912	12.3175	12.4415	12.1896	10.8419	11.0116	10.8095	10.624	10.9845	10.841	12.506	12.37	12.3297	11.3093	11.0922	11.6438	11.2219	11.2734	11.3926
LE01Gene01913	9.04287	9.24208	9.1166	10.0809	9.42411	10.2875	10.7038	9.45758	11.0957	9.40843	9.70485	9.77909	11.0559	11.3864	9.91395	10.7893	11.3449	10.585
LE01Gene01914	10.48	10.6839	10.818	11.7427	11.5211	11.6898	11.5802	11.2838	11.5483	10.4954	9.98964	10.3003	11.1821	11.0142	10.7856	10.9471	11.0808	11.6453
LE01Gene01915	11.8837	11.488	11.5836	11.5573	11.5087	11.4317	11.1575	11.5167	11.0413	11.7837	11.8034	11.796	11.6085	11.5451	11.8768	11.7043	11.2159	11.4357
LE01Gene01916	10.4755	10.5307	10.3805	10.0118	10.0629	9.99869	10.2342	10.3491	10.0717	10.1788	10.2527	9.88601	9.99833	10.3802	10.31	10.7631	10.8517	10.3916
LE01Gene01917	13.1922	12.8466	12.6014	12.703	12.7694	12.7448	12.3135	12.9331	12.0898	12.8794	12.9208	12.8669	13.1922	12.3749	12.811	12.5543	12.065	12.9245
LE01Gene01918	10.4073	10.9248	11.0561	10.5759	9.88635	11.0384	9.06939	8.21141	9.52243	10.5318	11.0459	10.3095	11.5673	11.5206	9.38873	9.61302	10.6513	11.107
LE01Gene01919	11.3206	11.2573	11.4435	12.1336	12.0694	12.1934	12.3797	12.1835	12.3132	11.0239	11.1121	11.3734	11.9946	11.8261	11.9852	11.7189	11.7639	11.8949
LE01Gene01920	8.48487	8.41816	8.16336	8.52312	8.58014	8.90727	8.43779	8.73965	8.19128	7.29727	6.64753	6.42182	8.15242	8.19884	8.14459	8.63807	7.63437	8.26682
LE01Gene01921	9.44237	10.0363	9.81804	9.34665	9.1076	9.12719	9.00272	8.94845	8.91735	9.25184	9.17787	8.5243	8.61521	8.15549	7.92917	8.12231	8.68823	8.40432
LE01Gene01922	10.0935	10.0752	10.4165	10.0161	9.98664	9.95367	9.86531	9.97708	9.68895	10.3026	9.77476	9.95508	9.89437	9.85016	9.84757	9.69462	9.62303	9.93758
LE01Gene01923	10.0947	9.72127	10.1925	10.375	10.2503	10.2417	10.2981	10.0957	10.3898	10.2791	10.5165	10.2257	10.8453	11.3849	10.9209	10.7427	11.1843	10.9207
LE01Gene01924	6.96794	7.06793	6.71043	8.29053	8.11992	8.07476	8.49712	7.49109	8.00803	7.41683	7.46256	7.88904	8.37612	7.9225	8.20138	8.02588	8.69198	8.77859
LE01Gene01925	10.6472	11.0559	10.8158	10.4312	10.5506	10.5783	10.3514	10.6313	10.1736	10.6766	10.5031	10.3909	10.1258	10.1663	9.88115	10.1253	10.431	10.5298
LE01Gene01926	0	0	0	3.50269	3.99392	3.93434	3.24676	3.22051	3.14939	0	0	0	0	2.957	2.624	2.65504	3.09099	3.45095
LE01Gene01927	10.2595	10.3187	10.5327	11.3329	11.1353	11.4237	11.4802	10.8389	11.1046	10.2275	10.0407	10.19	11.264	11.3318	11.1875	10.9307	11.4124	11.4765
LE01Gene01928	12.2455	12.2135	12.2199	12.0524	12.1004	12.1399	11.9591	12.1393	11.9716	12.2089	12.1799	12.1598	11.9946	11.6846	12.059	11.8082	11.5086	12.0611
LE01Gene01929	9.55194	10.1671	10.4431	11.0782	10.4142	11.2764	11.2843	10.097	11.8196	8.68177	8.56875	8.80697	10.8028	11.0567	9.43467	10.2673	11.0482	10.5738
LE01Gene01930	12.2375	12.259	12.1436	11.1684	10.505	11.2529	9.60259	9.21908	10.0642	11.4992	11.7503	11.1328	11.0685	10.5197	9.46029	9.28323	9.60124	10.4201
LE01Gene01931	11.1281	11.5246	11.7616	12.0486	11.859	11.8573	11.867	11.5803	11.7647	11.1358	10.9522	11.0672	11.2743	11.3942	11.089	11.5131	11.8126	11.7152
LE01Gene01932	13.7392	13.4927	13.5248	13.6243	13.675	13.6454	14.0196	13.912	13.9166	13.508	13.6203	13.8557	13.8607	13.709	14.0431	13.7426	13.6309	13.7335
LE01Gene01933	12.5819	13.455	11.9696	11.1922	10.742	11.086	11.2013	10.2807	11.3568	14.0783	13.988	14.2095	11.8084	12.0707	11.2173	11.0509	11.6509	11.7928
LE01Gene01934	11.7078	11.2635	11.6811	11.69	11.6138	11.6411	11.8086	11.4459	11.7149	11.0152	11.0334	10.7524	11.627	11.2152	11.3193	11.3161	10.9292	11.1768
LE01Gene01935	11.1275	11.0727	11.1772	10.5924	10.8496	10.4931	10.6965	10.7087	10.5181	10.5682	10.5098	10.3679	10.0879	9.89185	10.1824	10.2296	9.8749	10.2123
LE01Gene01936	10.9875	11.1391	11.2301	10.8508	10.8503	10.7461	11.0377	11.0757	11.1524	11.6507	11.3539	11.625	11.0565	11.3301	11.6628	11.3131	11.4807	11.1823
LE01Gene01937	11.6879	11.1748	11.4794	13.4752	12.7268	12.9562	13.7664	12.8867	12.6886	10.7853	11.01	10.7199	11.7629	11.3253	11.0863	10.7066	10.8254	11.4552
LE01Gene01938	12.6329	12.5771	12.3533	12.6615	12.4174	12.614	13.2395	12.8422	12.9302	12.5275	12.7669	12.7927	12.687	12.6952	12.8221	12.6782	12.4308	12.8036
LE01Gene01939	11.2418	11.4109	10.9963	10.4061	10.6301	10.1515	10.0081	10.8291	10.0382	11.6082	11.4672	11.6506	10.7092	10.9801	11.6003	11.6033	11.1147	10.7956
LE01Gene01940	15.0414	15.0108	14.4903	13.3136	13.1739	13.1839	12.9749	13.0743	13.0581	15.3192	15.5059	15.5309	13.9108	13.7073	13.9633	14.3838	13.7559	13.4126
LE01Gene01941	10.2338	10.4628	10.3726	10.6474	10.2842	10.7564	10.7825	10.5152	11.062	9.89236	10.4071	10.3209	10.0941	11.1651	10.2743	10.8285	11.4888	10.9744
LE01Gene01942	11.9065	11.8074	11.5853	11.1671	11.6402	11.2262	11.2005	11.9625	11.2476	11.446	11.7901	11.386	11.1396	11.2962	11.0918	11.3405	11.1916	10.9434
LE01Gene01943	13.6448	13.2259	13.6621	13.9604	13.3133	13.5336	13.3455	12.6905	13.3354	13.5338	13.5357	13.5627	13.0898	12.9191	12.8754	13.269	12.8926	12.5968
LE01Gene01944	6.0788	4.74781	6.223	7.88651	6.50138	7.67165	7.147	6.32285	7.05081	5.41757	5.43962	3.81904	6.11496	5.88231	5.17469	4.88814	6.45986	6.18062
LE01Gene01945	11.8165	11.1974	12.1355	14.1971	12.8822	13.8208	14.4172	12.5095	14.2807	10.3015	10.5877	10.921	12.5891	12.3439	11.9633	12.9116	12.9237	12.9944
LE01Gene01946	9.8992	9.72617	10.0524	10.5808	10.2809	10.5917	10.3634	10.177	10.3727	8.71548	8.66094	8.61246	9.43568	8.97599	8.54644	9.69277	9.62106	9.80125
LE01Gene01947	9.19016	9.20743	9.04882	8.94223	9.18366	8.84588	9.29512	9.14149	9.31135	8.80587	8.9579	8.9841	8.87591	8.89922	9.09103	8.91641	8.92349	9.13789
LE01Gene01948	10.8437	10.446	10.622	10.2036	10.5667	10.0147	10.1612	10.2153	10.3443	10.915	10.8162	10.6761	10.1745	9.8592	9.95807	10.4078	9.51277	9.85641
LE01Gene01949	11.5745	11.6426	11.6915	11.156	11.2618	11.0643	11.1628	11.3798	11.198	11.9473	11.9998	12.1702	11.4492	11.5334	12.0045	11.7561	11.319	11.1562
LE01Gene01950	12.4153	12.8389	12.3275	10.9856	11.0317	11.0034	10.4498	11.0059	10.603	12.4222	12.2657	11.97	10.7339	10.7436	10.3618	10.4781	10.8065	10.0554
LE01Gene01951	12.9696	12.6841	12.777	12.3031	12.3167	12.2328	12.3042	12.3355	12.1582	13.1843	13.4065	13.5359	12.9716	13.0037	13.0952	12.9953	13.0186	12.6054
LE01Gene01952	10.8352	10.5014	10.9075	10.7548	10.723	10.6329	10.7112	10.7397	10.4173	9.7402	9.49738	8.93737	10.4712	10.3581	9.71023	10.0025	10.4752	10.6228
LE01Gene01953	7.74938	7.67321	8.25644	8.71273	8.18151	8.34791	8.53064	7.96944	8.03921	6.82789	7.34776	6.61236	8.01826	7.54347	8.08547	7.85811	8.29301	7.36576
LE01Gene01954	9.79052	9.53633	10.0237	10.2581	9.94763	10.1731	10.3634	10.4955	10.1192	10.3793	10.565	10.927	10.4061	10.4919	11.2009	10.3327	10.6724	10.4096
LE01Gene01955	9.9734	10.2511	10.3314	9.85321	10.2031	9.98249	9.96675	10.2379	10.1148	10.4319	10.3129	10.6744	10.2574	10.4792	10.7367	10.4279	11.2061	10.6008
LE01Gene01956	11.0222	10.9219	11.1093	10.6949	10.867	10.7564	10.8589	10.9069	10.7086	11.1745	11.4091	11.6515	11.4477	11.6943	12.4185	11.2852	11.2671	11.1135
LE01Gene01957	12.7669	13.1916	13.0233	12.5049	12.5188	12.5026	12.6836	12.337	12.6716	12.9748	12.6516	12.6772	12.3603	12.5411	12.3653	12.3355	13.0552	12.6993
LE01Gene01958	11.2996	11.0461	10.8453	11.085	11.4043	10.9987	11.2197	12.1282	11.1856	10.9691	11.0194	11.4664	11.2239	11.6872	12.3511	11.7732	11.6295	11.3199
LE01Gene01959	12.7476	12.6971	12.6839	13.4723	13.5996	13.5816	13.6991	14.3685	13.5167	12.7691	12.7944	13.0405	13.6567	13.5683	14.021	13.3137	13.2921	13.4957
LE01Gene01960	12.2235	12.5192	12.1876	10.653	10.8415	10.6173	10.4572	10.8944	10.6653	12.5861	12.404	12.3838	10.7316	11.1742	11.2166	11.1116	11.2671	10.7177
LE01Gene01961	11.5771	11.6426	11.59	11.3862	11.4779	11.245	11.4253	11.6299	11.6036	11.5492	11.6918	11.6596	11.4578	11.9184	11.7882	11.8987	12.0639	11.6104
LE01Gene01962	10.5928	10.6098	10.3026	9.90233	10.0977	9.88702	10.1067	10.5264	10.3153	10.5627	10.4334	10.2829	9.71966	9.99656	9.86366	9.77708	10.0992	9.89305
LE01Gene01963	10.9307	10.4677	10.8993	12.3924	12.1501	12.5742	12.3853	11.914	12.0313	9.93591	10.3823	10.5302	12.618	11.9302	11.8926	11.9834	11.3603	12.524
LE01Gene01964	11.0203	11.6291	11.6253	11.603	11.4191	11.5191	11.3728	10.9719	11.3636	11.9519	11.6745	11.5322	11.7367	11.9184	11.8362	11.8005	12.1966	11.8537
LE01Gene01965	11.7664	11.7355	11.2821	10.3178	10.5614	10.7469	10.3647	10.6473	10.5936	11.9244	11.7584	11.5919	10.9472	11.2023	11.2791	11.4792	11.5624	10.8672
LE01Gene01966	12.7514	12.022	13.0984	15.2254	14.3555	14.8599	15.1957	13.5967	15.7956	13.0727	12.6435	13.5343	16.0438	16.752	15.9384	17.7032	17.304	15.2711
LE01Gene01967	10.1391	9.98265	10.0437	9.44405	10.607	9.61118	9.26699	11.5208	9.11757	10.1196	10.0486	9.49839	8.95148	9.06978	9.93085	8.5592	8.88138	9.31486
LE01Gene01968	10.0888	9.78376	10.0549	10.1625	10.4579	10.1647	10.2771	10.7537	10.3381	9.97122	9.91096	10.1547	10.0866	10.4194	10.3436	10.5914	10.57	10.0392
LE01Gene01969	10.5978	10.9319	10.9762	11.807	11.364	11.6428	11.963	11.3404	12.1396	10.1246	9.8862	9.85806	10.6624	10.8242	10.4593	11.3534	11.4867	11.1983
LE01Gene01970	14.2651	14.5291	14.0876	13.5978	13.3377	13.3782	13.2989	13.634	13.7475	14.5558	14.212	14.1132	13.1358	13.4523	13.0467	13.5642	13.5658	13.2097
LE01Gene01971	10.6472	10.3089	10.5022	10.384	10.0413	10.1479	10.1658	10.177	9.79503	9.87457	10.0486	9.18998	9.92385	10.3697	9.79486	10.0609	9.79689	10.0033
LE01Gene01972	10.8937	10.5991	10.9834	10.1349	10.3088	10.4077	10.3311	10.4066	10.27	11.0506	11.1165	11.125	10.7292	10.6311	10.7609	10.7649	10.5711	10.2818
LE01Gene01973	13.6816	13.0856	13.4995	14.4626	13.7606	14.1261	14.3929	13.7434	14.0013	12.9914	13.2324	13.2278	13.6073	13.7886	12.9686	15.433	14.587	14.1878
LE01Gene01974	11.0958	11.0873	11.0033	10.4505	10.7238	10.7413	10.5062	10.4945	10.6227	10.915	10.9022	10.832	10.0717	10.0891	9.73667	9.75248	9.70888	10.148
LE01Gene01975	9.44796	9.0676	9.61206	10.5232	10.4665	10.7039	11.0057	10.7572	11.0429	8.87611	9.15854	8.89825	10.3378	10.4822	10.5255	10.5025	10.6013	11.2685
LE01Gene01976	9.55194	9.66279	9.97497	12.1687	11.8385	11.8819	11.8505	11.4987	11.7052	9.38976	8.89796	9.10531	11.1033	10.7247	10.5214	10.4213	10.7006	11.4955
LE01Gene01977	13.2183	12.734	12.9237	12.7995	12.6196	12.7777	12.5953	12.6923	12.5475	13.1639	13.4168	13.6978	13.4189	13.3864	13.4783	13.2803	13.1486	13.127
LE01Gene01978	10.8813	10.5062	10.5512	10.178	10.5551	10.4337	10.2371	10.8713	10.4315	10.8011	12.0194	11.3524	11.2949	12.1838	11.5839	10.887	11.9161	10.7671
LE01Gene01979	10.4809	10.7978	10.8396	11.1742	11.0859	11.1967	10.927	11.1195	10.6431	11.0239	11.0681	10.9285	11.3125	11.7729	11.3205	10.5318	11.8696	11.746
LE01Gene01980	8.48124	8.17203	8.17249	8.98993	8.89496	8.61302	8.93996	9.13883	9.16357	7.594	8.19941	8.31632	8.91558	9.02231	8.83778	8.69082	9.11176	9.01859
LE01Gene01981	10.772	10.6696	10.6687	10.7694	10.9476	10.8906	10.634	10.8552	10.6144	10.6437	10.758	10.7641	11.2981	10.9759	10.8685	11.053	10.6676	10.5453
LE01Gene01982	13.7768	13.4721	13.2864	13.0053	13.2644	13.1723	13.271	13.5329	13.4245	13.7974	13.8641	13.079	13.2992	13.0783	13.1023	13.6721	13.12	13.4075
LE01Gene01983	12.7742	12.4608	12.2963	11.2478	11.191	11.3451	11.0755	10.7932	11.0235	12.458	12.9084	12.5705	11.8323	11.8573	11.6289	11.6392	11.6946	11.0795
LE01Gene01984	10.7121	11.0918	11.0604	10.6557	10.7716	10.8487	10.3092	10.931	10.4652	11.0206	11.0347	10.7948	10.3911	10.9745	9.81816	12.4824	12.4578	11.0426
LE01Gene01988	11.0346	10.7221	10.7093	10.4083	10.5041	10.571	10.511	10.7042	10.6391	11.0453	10.6278	10.8383	10.1486	11.3285	10.943	12.2146	12.1649	10.7964
LE01Gene01989	11.0078	11.3832	10.9426	9.82882	10.2168	9.96609	9.69417	10.1561	10.27	11.6256	11.623	11.5643	10.971	11.649	11.5209	10.6761	11.7242	10.9572
LE01Gene01990	10.6737	10.3687	10.1388	8.86119	9.44744	9.06953	9.03977	9.19368	8.86958	10.8872	10.8632	11.0515	9.59079	9.06719	9.59549	9.14154	8.9362	8.48655
LE01Gene01991	11.4971	11.8132	11.8114	11.4323	11.7819	11.6203	11.8443	11.854	11.7091	12.0906	12.0561	12.0147	11.8309	12.0342	11.7742	11.8423	11.996	11.483
LE01Gene01992	13.482	13.346	12.939	11.9347	11.8713	11.3775	10.9025	11.8129	11.3096	12.9141	12.1808	11.4545	11.3357	10.7452	10.7209	11.5538	10.8305	11.6569
LE01Gene01993	4.43947	4.79836	3.95955	3.85153	3.71511	2.74744	4.85316	3.86016	3.47537	4.28126	4.70346	3.18111	3.49736	3.76168	2.35943	4.40155	3.41543	3.31353
LE01Gene01994	10.7518	10.417	10.2817	9.53529	9.56587	9.69812	8.8706	9.59393	9.27252	10.6019	10.4415	10.2557	9.51716	8.77423	8.6796	9.66479	8.59109	8.49054
LE01Gene01995	10.5239	10.6973	10.4308	10.5523	10.5922	10.1838	10.812	10.5978	10.7979	10.6314	10.5841	10.6401	10.1307	10.127	10.363	10.5492	10.7554	10.5385
LE01Gene01996	10.2022	10.2363	10.3775	11.2274	10.9284	11.2891	11.6581	11.0936	11.6827	10.0057	9.94802	10.2991	11.41	11.7825	11.2677	11.6554	11.7492	11.4825
LE01Gene01997	13.4115	13.4581	13.6978	14.0835	14.5158	14.2719	14.3503	15.1448	13.8235	13.7249	13.7975	13.7411	14.2257	14.3645	14.0184	13.2989	14.0376	14.6888
LE01Gene01998	9.78022	9.96617	10.2125	9.59048	10.4713	9.9852	9.59808	11.3966	9.79686	9.76133	10.3042	9.38977	9.06169	10.7557	9.61272	8.09461	10.5903	9.97794
LE01Gene01999	9.69037	9.40181	10.2301	11.3381	11.0515	11.4978	10.1504	9.84463	10.4992	8.70209	8.62265	8.37009	10.7019	10.1578	8.89837	9.42119	9.82963	10.5719
LE01Gene02000	15.5756	15.5471	15.5735	15.4171	14.9427	15.2543	14.4685	14.2403	14.7376	15.4957	15.4997	15.2186	14.9462	14.1971	14.4733	14.8849	14.4855	14.5797
LE01Gene02001	11.3943	11.827	11.6443	11.8206	11.5887	11.6797	11.5384	11.3491	11.8156	11.3829	11.1346	10.9941	11.2518	11.1251	11.1282	10.8209	11.445	11.5414
LE01Gene02002	11.7355	11.9847	11.9673	11.6923	11.6785	11.8167	11.814	11.5606	11.5564	11.7649	11.6092	11.7021	11.4593	11.4381	11.5077	11.2955	11.6329	11.8486
LE01Gene02003	10.813	10.7496	10.851	10.2918	10.662	10.5908	10.2771	10.6027	10.2648	10.6154	10.8891	11.0432	11.0238	11.1904	10.9392	10.5865	11.0066	10.9013
LE01Gene02004	13.2796	13.7672	13.1315	11.8918	12.1976	11.8006	11.9035	12.2693	11.9401	13.7251	13.4409	13.3073	11.952	12.1347	12.221	12.2505	12.5431	12.1897
LE01Gene02005	8.89254	9.27145	9.25408	10.5293	9.90613	10.1897	10.3845	9.32816	10.0474	8.74842	8.86852	9.16231	9.25526	9.2705	8.60885	9.14963	9.34892	9.98644
LE01Gene02006	10.5492	10.0244	10.0338	10.8057	10.3803	10.5565	10.2926	10.0567	10.3038	9.73364	9.94097	10.3535	10.6499	9.83803	10.4917	9.96472	9.70888	10.5681
LE01Gene02007	3.94471	4.89443	3.87261	5.53833	4.48966	5.764	5.97436	5.86315	6.04946	2.77071	2.95335	2.81814	4.99454	6.96237	5.43795	6.66781	6.78906	7.00197
LE01Gene02008	10.6649	10.161	10.2817	10.0503	10.538	10.2257	10.2926	10.7051	10.2753	10.3474	10.4799	10.765	10.0842	10.5273	10.4782	10.9158	10.5203	9.85331
LE01Gene02009	14.9648	15.0796	15.1194	15.0579	14.5849	14.8826	14.0995	13.8057	14.3498	14.9453	14.8677	14.5944	14.3975	13.6184	13.5975	14.2821	13.9252	14.0203
LE01Gene02010	8.98512	8.90699	8.99838	9.34894	9.07051	8.70809	8.65742	8.90215	8.70437	8.70209	8.23214	8.39625	8.74987	8.35604	8.37301	8.08338	8.23245	8.70149
LE01Gene02011	11.2202	11.3471	11.3849	11.1136	10.8648	10.7793	11.4747	10.7632	11.5292	12.7049	12.1796	12.1579	11.453	12.5778	12.393	12.0724	13.0599	12.4308
LE01Gene02012	11.6128	11.4962	11.0781	12.7628	12.2572	12.5692	12.6524	11.7542	12.5591	12.173	11.7143	11.4766	11.5629	12.0135	11.1914	12.3004	12.4696	11.9514
LE01Gene02013	10.7106	10.6533	10.4088	10.8484	10.6587	10.6476	11.181	10.9554	11.0243	10.9809	11.0551	11.6397	11.4448	11.4655	12.0333	11.5503	11.2443	11.251
LE01Gene02014	12.3875	12.0971	12.198	11.9608	11.9682	11.9626	11.786	11.7607	11.7712	12.0929	12.0954	12.1492	12.2028	12.0742	11.9464	12.1332	11.8165	11.8683
LE01Gene02015	9.16098	9.4221	9.33558	10.2212	9.99326	10.1098	10.1627	9.50379	10.4467	9.06052	7.99116	9.18998	9.03877	9.46257	8.55835	9.37589	8.98596	9.17556
LE01Gene02016	9.4973	9.57127	9.85961	10.2323	10.1185	10.0424	10.224	10.1937	10.0366	9.54029	9.43045	9.08937	9.84531	9.36445	8.97737	9.25598	9.02814	9.5943
LE01Gene02017	10.2327	10.2557	9.637	8.84507	8.48564	8.28322	8.76594	8.93318	8.57845	10.2484	10.5521	9.77744	8.75613	8.51694	8.48954	9.02897	8.61896	8.24808
LE01Gene02018	11.1676	11.3634	11.5476	12.4462	12.1745	12.3567	12.3408	11.8702	12.082	11.0293	10.6075	10.619	11.7861	11.5641	11.2198	11.575	11.6686	12.187
LE01Gene02019	13.701	13.6596	13.5334	12.5565	12.6576	12.4069	12.1924	12.5398	12.1006	13.8236	13.6327	13.44	12.384	11.7825	12.2776	12.3056	11.72	12.1206
LE01Gene02020	11.7823	11.8906	12.2415	11.8496	11.6924	11.7186	12.1033	11.5803	12.1131	12.0002	11.5045	11.9097	11.7629	11.7354	11.5575	11.6559	11.8592	11.5723
LE01Gene02021	11.7808	11.4564	11.5193	10.9885	11.3304	10.9235	11.1544	11.3329	11.0367	11.3164	11.5764	11.5415	11.0264	10.532	10.4358	10.9868	10.4444	9.70835
LE01Gene02022	13.8318	14.2119	14.2475	14.0929	14.1618	14.0451	14.1973	14.0778	14.1203	14.3203	13.9472	14.2556	14.1347	13.9604	14.0705	13.8837	13.8426	14.0131
LE01Gene02023	10.2919	10.3013	10.0721	10.2311	10.2111	10.1683	10.2298	9.70417	10.3242	10.544	10.7329	10.9255	11.066	11.2402	10.391	10.2448	10.5842	10.2243
LE01Gene02024	10.6887	11.0669	10.7472	9.93164	9.9959	10.0973	9.95269	10.1429	9.76737	10.7669	10.5127	10.4863	9.6575	9.58925	9.76606	9.70198	9.95361	9.84086
LE01Gene02025	6.75607	7.37319	7.63914	10.6268	9.84449	10.5529	10.7953	9.84951	10.963	7.11733	7.75416	7.57476	9.99304	9.95923	9.53851	9.69092	10.2159	11.1328
LE01Gene02028	6.91513	5.91648	6.43506	7.03583	5.96804	6.89621	7.26549	5.91381	7.20173	6.84017	6.76722	5.65619	4.86155	5.50641	5.47192	5.43926	5.77399	3.99125
LE01Gene02029	11.7366	12.1691	11.3888	10.76	10.7302	10.605	10.5994	10.7546	10.945	12.2706	11.6973	11.954	10.3971	10.8793	10.7652	10.7771	11.2469	10.6824
LE01Gene02030	10.1811	9.82549	9.92992	10.653	10.0038	10.1635	10.7904	10.1039	10.5434	9.40843	9.44648	9.1699	9.92246	10.1856	9.53851	9.59928	10.0401	10.6833
LE01Gene02031	11.6732	11.473	11.4121	10.5759	10.7166	10.3393	10.3779	10.7389	10.2097	11.9088	11.917	11.6846	10.7059	10.6018	10.5965	10.8584	10.3238	10.2749
LE01Gene02032	12.8916	12.8378	13.087	12.7151	12.759	12.7536	12.2956	12.7902	12.1712	12.9726	12.6425	12.6183	12.4238	11.5073	12.2674	11.7587	11.2797	11.9575
LE01Gene02033	9.17227	9.46381	9.13773	9.16377	9.51709	9.02538	8.72516	9.20389	8.91399	9.4043	9.24814	9.01537	8.45132	7.91674	8.9475	8.86159	8.28806	8.3873
LE01Gene02034	9.55021	9.29365	9.87507	10.6759	10.1341	10.2864	10.7874	10.2552	10.4054	9.11205	9.14387	8.93737	9.67412	9.7107	9.42387	9.62855	10.243	10.2979
LE01Gene02035	12.4389	12.0412	12.3007	11.5044	11.597	11.7344	11.2766	11.5136	11.7615	12.5951	13.4313	13.2778	13.2732	13.6793	13.4021	12.9861	13.3486	12.7751
LE01Gene02036	12.245	11.9575	11.8106	10.9656	11.2613	11.0482	11.1139	11.4924	10.9058	12.4956	12.6324	12.5763	11.921	12.0272	11.9313	12.2806	12.1154	11.8024
LE01Gene02037	12.9045	13.3958	12.8894	10.7873	11.2145	10.6747	10.2122	10.7132	10.6713	13.1377	12.9264	12.5004	10.1234	10.7557	11.0254	11.1246	11.236	10.7916
LE01Gene02038	11.6186	11.4028	11.4322	10.405	10.4231	10.3551	9.8215	9.82325	9.93089	11.6645	11.6876	11.4415	10.2684	9.46455	10.0704	10.0143	9.61712	9.58126
LE01Gene02056	12.6534	12.9461	12.5139	11.9834	11.84	12.005	11.7227	11.8601	11.8335	12.9799	12.6781	12.8453	11.7792	11.7223	11.7156	11.463	11.6509	11.7584
LE01Gene02057	7.09682	7.68669	6.64636	7.04715	8.70799	7.35653	7.04466	8.436	6.7377	6.65801	4.34147	6.24123	6.61935	6.41075	7.04637	4.60372	6.38765	6.01318
LE01Gene02058	12.0543	12.7407	12.8324	9.69131	9.35999	8.99338	8.59542	7.67856	7.83407	12.3089	12.1739	11.5124	12.6083	12.9548	11.7271	12.1648	12.1369	10.0419
LE01Gene02059	11.6447	11.7794	11.1341	10.169	10.5078	10.0784	9.83497	10.4587	10.1163	12.1694	12.3408	12.4591	11.3035	11.1511	11.3011	11.0914	10.9591	10.5327
LE01Gene02060	4.4981	4.94017	3.68123	5.50588	4.60481	4.32559	5.12802	4.86215	4.74781	5.24367	0	4.25985	4.90726	3.41473	4.21409	5.29095	4.1851	5.54545
LE01Gene02061	6.37315	6.8091	6.13234	7.351	7.68878	7.26121	7.99184	7.80472	7.64436	5.93512	6.23266	5.96657	7.06473	6.84599	6.6161	7.73434	7.19026	7.81726
LE01Gene02062	3.85784	5.06929	4.26281	6.66175	7.31041	6.8131	6.68521	5.91381	7.25581	4.48261	3.65118	4.09931	6.1343	5.83424	4.50406	5.57374	5.52747	5.92156
LE01Gene02071	4.76007	4.79836	5.77297	5.95363	5.98939	5.25357	5.63016	5.61019	4.24755	4.86549	6.30478	5.74026	5.33273	5.85848	5.17469	5.98923	6.51174	5.60557
LE01Gene02072	7.83147	8.49679	7.14075	6.38679	7.55197	6.87295	6.27484	7.58005	6.98829	7.6578	6.39013	6.81982	5.57853	4.95232	3.74362	5.21065	6.65705	5.41715
LE01Gene02073	10.8542	10.8436	11.4885	12.8397	12.7078	13.1549	13.6831	12.5185	13.7838	10.0891	9.74428	10.3734	11.8886	12.1859	11.359	11.9436	12.5813	12.0306
LE01Gene02074	10.1264	10.8675	10.9539	11.3137	11.5161	11.3318	11.6971	11.2862	11.6623	9.78216	9.83232	10.138	11.2933	11.4265	11.4661	11.2661	11.8999	11.2534
LE01Gene02075	11.8595	12.0046	12.8221	12.7503	13.3374	13.0959	12.9827	12.5586	13.4611	11.0598	11.1784	10.8486	13.042	13.2143	12.3841	13.5282	13.1494	12.4975
LE01Gene02076	9.7091	9.68479	10.5139	12.3108	11.8702	12.2453	12.0837	11.3112	11.8673	10.0287	10.046	10.2462	11.971	11.88	12.1673	12.4771	12.0246	12.7213
LE01Gene02077	12.23	12.0892	12.3705	12.0956	12.0345	12.1623	12.0646	11.7757	12.015	12.3073	12.2186	12.3379	12.2286	12.26	11.549	12.8718	12.4904	12.0748
LE01Gene02078	6.15365	7.86327	7.65225	5.57006	5.15105	6.15963	5.66507	5.00918	4.48344	5.31577	5.34018	5.09967	6.83571	6.59511	6.23592	6.94098	7.00959	6.12008
LE01Gene02079	10.6769	11.027	10.7077	10.0104	10.2426	9.94254	9.87467	10.3932	10.0397	10.7742	10.3346	10.54	9.96765	9.87413	10.0368	9.65154	9.9707	9.79158
LE01Gene02080	10.7443	11.1063	10.6533	11.0212	11.0194	11.1123	10.9422	11.0348	10.7906	11.0407	10.8964	10.6681	11.1994	11.1657	11.1328	11.0879	11.3413	11.49
LE01Gene02081	9.50625	9.26921	9.36175	10.1832	10.1014	10.1707	10.2196	9.94547	10.0611	9.39185	9.98004	9.82153	10.5069	10.8547	10.3076	10.5795	10.7446	10.4336
LE01Gene02082	11.7351	11.3905	11.3144	12.2364	11.8256	12.0236	12.449	12.0472	12.6315	11.195	11.6017	11.7147	12.124	12.5971	12.5235	12.466	12.542	12.2592
LE01Gene02083	14.6042	14.1671	14.15	13.1697	13.2205	13.2015	12.6374	13.2925	12.8831	14.678	14.8595	14.6478	13.7642	13.7013	13.5603	14.069	13.6924	13.101
LE01Gene02084	12.3045	12.0461	11.856	12.263	13.5197	12.3567	12.3135	13.3056	12.6031	12.5339	12.2942	12.7624	13.0367	12.9941	14.2865	11.8918	12.2973	12.8036
LE01Gene02085	9.9447	10.1404	10.5202	10.3025	9.92149	10.562	9.22958	8.84782	9.42429	9.7054	9.38127	9.1315	10.1379	10.0671	8.84104	7.91623	9.89458	10.5064
LE01Gene02086	11.9072	12.2178	11.9258	11.6613	11.9418	11.8595	11.3714	11.8726	11.4908	11.6078	11.7222	11.6036	11.8438	11.5714	11.8137	11.812	11.4823	11.849
LE01Gene02087	11.2213	10.8178	11.0591	10.1651	9.77242	10.3276	9.85967	9.99042	10.0672	11.0393	10.8744	10.9013	10.4209	9.92808	10.087	10.2384	10.0518	9.46438
LE01Gene02088	11.8657	12.6212	11.9183	10.6805	10.9899	10.6823	10.2615	10.944	10.2287	11.9074	11.5497	11.2104	10.2057	10.1319	10.0325	10.2065	10.3537	10.0392
LE01Gene02089	11.6564	11.9047	11.7567	11.2466	11.5207	11.3718	10.9546	11.4672	11.3388	11.44	11.3993	11.4151	11.4731	11.271	11.5005	10.9276	11.0208	10.678
LE01Gene02090	14.843	14.9656	14.9102	14.9425	14.543	14.7715	13.8547	13.7352	14.0958	14.8323	14.6879	14.489	14.2479	13.4454	13.8473	14.2666	13.8651	13.9641
LE01Gene02091	16.7943	16.9123	17.4919	16.0458	16.5994	16.2754	16.3016	16.7513	16.3898	15.1061	14.127	14.5699	15.5394	15.4278	14.3665	15.3937	15.8893	15.6596
LE01Gene02092	11.6701	11.4129	11.6815	13.2706	12.4235	13.7887	13.7785	12.2087	14.5325	9.38138	9.00466	9.04873	13.8627	14.4687	12.7863	16.8602	15.7012	14.1584
LE01Gene02093	11.776	11.6801	11.4029	11.4858	12.5571	11.5827	11.2913	13.0902	11.4601	11.1962	11.2046	11.0405	10.9943	10.9006	11.7288	11.6775	11.1682	11.0289
LE01Gene02094	10.0179	10.0257	10.0806	11.41	11.2414	11.5068	11.5467	11.7029	11.3753	8.87312	8.47027	8.41768	9.26187	9.22696	9.55446	9.41449	9.8583	9.66487
LE01Gene02095	11.1653	11.8067	11.9966	13.3718	13.0625	13.2449	13.4717	12.8449	12.7009	9.93305	9.16582	10.1106	11.387	11.0242	10.7523	11.1651	10.9684	10.4755
LE01Gene02096	7.15264	8.33499	6.97326	6.11291	6.20549	6.63098	7.00433	5.69953	6.98829	6.00221	5.15749	4.96637	5.97173	7.19901	4.36635	3.88523	6.626	5.48273
LE01Gene02097	2.20151	4.02937	4.99706	4.4376	3.23261	3.3958	5.88833	5.09949	5.11855	1.55654	2.76167	4.25985	4.95156	4.34545	4.13148	3.0735	5.22995	4.6349
LE01Gene02098	11.1246	10.8571	10.8792	11.399	10.8806	11.0898	11.2983	11.0922	11.0413	11.5398	11.76	12.4121	11.994	11.7161	12.1421	11.9709	11.8488	11.3305
LE01Gene02099	8.32403	8.67644	8.56448	9.06701	8.90904	9.4198	9.54518	8.92395	9.61845	7.61558	7.3392	7.70601	8.55187	8.36029	8.84428	8.21783	7.87125	8.76876
LE01Gene02100	9.22962	9.33061	9.23896	9.44405	8.78937	9.26535	8.8706	9.08182	8.79117	8.30158	8.3938	8.55558	8.81726	9.14805	9.05226	9.44332	8.82439	8.7851
LE01Gene02101	12.1579	11.9816	11.9459	11.6282	11.8144	11.6793	11.8164	11.8483	11.7961	12.297	12.2705	12.5791	12.1803	11.7115	12.2075	11.9455	11.5038	11.879
LE01Gene02102	6.84909	7.15779	7.24826	6.13429	5.73511	7.03889	6.9056	5.69953	6.64346	6.54257	6.85391	5.91926	5.71329	8.54707	6.7187	6.86432	8.81065	8.23387
LE01Gene02103	13.0183	13.1889	13.3835	13.1173	14.0219	13.25	13.0695	13.9219	13.1753	11.9526	11.7858	11.3816	11.6649	12.1322	11.2543	11.3393	12.4698	12.5342
LE01Gene02104	9.15416	9.28702	9.46008	8.53924	9.19749	8.89	8.90021	9.66958	8.91735	9.38348	8.94948	9.29101	8.87015	9.39377	8.6428	8.67968	8.78628	8.9651
LE01Gene02105	10.1822	10.9055	10.3597	9.43761	9.10271	9.24963	9.34979	9.26858	9.36647	10.6559	10.4731	10.4597	9.22399	8.8243	9.59933	9.44332	9.65606	8.95647
LE01Gene02106	12.3284	12.4942	12.2213	13.9587	13.3762	13.6896	14.0588	13.1857	13.4225	12.3473	11.7547	11.9206	12.4477	12.3532	11.9574	12.1528	12.555	13.0415
LE01Gene02107	10.1311	9.89827	10.0161	11.59	11.1795	11.2847	12.1073	11.356	11.6197	9.73199	9.57781	10.2086	10.6608	10.5783	11.0254	10.4962	10.485	11.2633
LE01Gene02108	10.9492	10.8895	10.5677	10.9656	10.9819	10.734	11.6516	11.1555	11.4421	10.6446	10.6813	10.6947	10.8671	10.5044	10.8297	11.0745	10.57	12.8951
LE01Gene02109	4.71135	5.84614	6.47987	7.76154	6.78393	7.12017	7.89957	5.75615	8.48644	4.71365	5.87819	4.25985	5.19211	5.59561	5.92859	6.7411	6.64161	7.06755
LE01Gene02110	12.1994	12.4051	12.5253	12.8334	12.7949	12.7996	12.847	12.6118	12.9507	12.3207	12.0231	12.356	12.4008	12.9658	12.7078	12.8775	13.2339	12.9975
LE01Gene02111	8.03822	7.40616	8.53294	9.69491	9.35794	9.72759	9.65346	9.57635	9.91753	7.04494	7.38151	7.05688	8.84688	8.75822	8.26089	8.99642	8.69198	9.283
LE01Gene02112	11.4375	11.5316	11.4496	11.0212	10.767	10.9348	10.7432	10.4872	11.3312	11.6185	11.3135	11.6291	10.9588	10.7845	11.3709	11.2907	11.1903	10.7313
LE01Gene02113	14.4594	14.7255	14.5553	14.6872	14.1784	14.4175	13.8572	13.4711	13.9465	14.3849	14.2132	13.999	14.098	13.3731	13.5286	14.0402	13.793	13.9689
LE01Gene02114	12.586	12.5472	12.0674	11.1422	11.1731	11.0193	11.319	10.9726	10.7115	12.3887	12.2104	12.0655	10.8851	11.0967	10.6986	10.5369	10.8322	11.4475
LE01Gene02115	9.9328	9.97306	9.73883	9.63617	9.73815	9.39756	9.66213	9.67142	10.182	10.0826	9.79524	9.60128	9.5625	9.86967	10.0883	9.55322	10.1105	9.50243
LE01Gene02116	12.3974	12.0908	11.9872	12.0169	11.8997	12.1289	12.1946	12.0182	12.1776	12.4873	12.9853	13.0467	12.7684	13.0059	12.7708	12.8014	12.9048	12.5941
LE01Gene02117	9.85783	9.76164	9.96055	10.1216	9.90332	10.1381	10.0233	9.71135	10.0912	9.67488	9.69314	9.54589	9.64743	9.67703	9.87481	10.0276	10.0503	9.68591
LE01Gene02118	8.62957	8.67306	8.47878	8.36025	7.66244	7.89592	7.46689	7.18567	7.97617	8.96286	9.2798	8.90737	7.18093	7.05964	7.53832	7.55897	7.24237	7.2099
LE01Gene02119	10.4016	10.1562	10.3834	10.7488	10.1847	10.5547	10.505	10.4608	10.4789	10.0016	10.3655	9.82795	10.381	10.1043	10.0787	10.4112	10.2327	10.1891
LE01Gene02120	10.5919	11.0184	11.1439	10.1376	10.2336	10.2698	10.0549	9.8769	9.68895	11.1358	10.9944	10.6868	9.95411	10.3979	9.66138	9.22054	10.5433	9.95646
LE01Gene02121	12.7339	12.602	12.618	11.5323	11.8593	11.5344	11.5147	11.8861	11.6945	12.6688	12.8119	12.8117	12.0688	11.9327	12.3782	12.2904	11.7039	11.496
LE01Gene02122	12.9662	12.7608	13.1161	13.9951	13.7498	14.1097	14.6387	14.1	14.3105	12.581	12.5691	12.0453	13.3785	13.6538	12.0918	12.584	13.5111	13.8605
LE01Gene02123	9.62938	9.869	9.95527	9.83699	9.84888	9.74531	10.2544	10.0268	10.0101	9.80269	9.69314	9.45551	9.49488	9.55815	9.0153	8.98741	9.67135	9.37654
LE01Gene02124	12.5392	12.9836	12.4269	11.807	11.8898	11.8386	12.0151	12.0437	11.7308	12.7745	12.5407	12.5263	11.8357	11.9133	12.1081	11.7085	11.9462	11.9871
LE01Gene02125	12.1861	11.8425	12.3344	12.0301	11.6587	11.9372	12.0654	11.8154	12.1127	12.2615	12.3846	12.5722	12.0101	11.8845	12.052	12.2809	12.1231	11.7916
LE01Gene02126	9.54326	9.84064	9.87925	8.927	9.3497	8.80959	8.74976	9.16259	9.04877	9.37718	9.17787	8.24616	7.92136	8.10575	6.92898	8.0141	7.3508	7.06755
LE01Gene02127	8.6197	8.53828	8.41098	8.60581	8.64548	8.44575	8.73341	8.96356	8.23502	8.03946	8.46635	8.04044	7.7438	7.05964	7.03505	7.42304	7.11398	7.79161
LE01Gene02128	11.9548	11.686	11.6618	10.2086	10.6402	10.2382	9.44075	10.2141	9.67908	11.5769	11.5069	11.2875	9.80514	8.96208	9.61842	9.73105	9.33938	8.75224
LE01Gene02129	7.98796	8.03646	8.84412	9.9438	9.46279	10.1197	10.0317	9.09285	9.68895	7.79024	7.35627	7.17236	8.56619	8.59834	7.58564	8.19714	8.43413	8.7851
LE01Gene02130	11.8086	12.1351	11.6974	12.2004	11.9061	12.0272	12.3018	11.7847	12.1378	12.2143	12.0317	12.1191	12.1426	12.6096	12.286	11.6564	12.4475	12.3252
LE01Gene02131	4.60866	3.11512	4.11913	3.95129	4.54838	5.48597	3.95961	3.6371	4.55421	4.12949	4.19735	3.18111	3.37258	5.16156	3.50197	3.24456	4.95806	4.7459
LE01Gene02132	7.68143	8.10333	7.76517	8.79895	8.45527	8.17801	8.2085	8.42731	8.65692	7.23356	6.45496	7.24132	7.30563	7.12103	6.63121	6.60637	7.63437	7.77207
LE01Gene02133	7.24111	7.84535	7.95169	7.51486	7.92871	8.23386	8.44785	8.09	8.21332	7.09701	7.25069	6.35228	7.62573	7.95095	7.89201	8.09461	8.07467	7.71863
LE01Gene02134	12.7111	12.4942	12.4397	11.0298	11.4689	11.0047	10.4207	11.628	11.0965	12.2196	12.129	11.6134	10.7975	10.5404	11.1255	11.2149	10.3958	10.6693
LE01Gene02135	9.63919	9.40589	9.88065	11.3655	11.1389	11.3676	11.4654	11.3381	11.3898	9.51945	9.57234	9.78075	11.1474	11.135	11.3053	11.4915	11.2734	11.4362
LE01Gene02136	9.95651	9.94669	10.0047	10.3049	10.0025	10.0973	10.3514	9.65104	10.3229	10.3676	10.8595	11.4156	11.1838	10.815	10.7839	11.1751	10.8508	10.8196
LE01Gene02137	10.4782	10.6729	10.3436	10.443	10.5791	10.4661	10.4027	10.7546	10.5628	10.3092	10.3771	10.5975	10.4502	10.943	10.347	10.032	10.767	10.5064
LE01Gene02138	12.8259	12.4637	12.4288	12.0115	11.9106	12.0302	11.6886	11.6715	11.8205	12.8321	13.1817	13.236	12.8624	12.9236	12.9061	12.768	12.7097	12.2882
LE01Gene02139	11.5613	11.6687	11.7014	11.7856	11.4483	11.6976	11.5225	11.4055	11.2335	11.8248	11.9988	11.777	12.273	12.3757	11.7802	11.5533	12.0765	12.0476
LE01Gene02140	12.7743	12.2041	12.504	12.1765	12.3416	12.1104	12.1773	12.3244	12.2084	12.5419	12.6578	12.456	12.171	12.0111	12.0611	12.3505	11.8967	11.5438
LE01Gene02141	10.4636	10.1489	10.0866	10.3271	10.2679	10.4613	10.4143	10.5978	10.527	10.5829	10.5493	11.5064	9.93078	9.79001	10.6382	9.91333	9.50426	9.48653
LE01Gene02142	11.6165	11.2753	11.9016	12.9242	12.5577	12.7843	12.8065	12.3448	12.7842	11.2345	11.042	11.3558	12.7717	12.6486	12.4007	13.1538	12.905	12.9557
LE01Gene02143	3.66661	3.75006	4.51326	9.76342	7.96688	9.07208	10.2472	7.92691	10.566	3.28342	4.19735	4.81949	8.90154	9.51306	8.0964	10.9502	10.8237	9.6471
LE01Gene02144	3.94471	0	5.25942	9.36485	7.4632	8.97711	9.46076	6.88919	9.71621	4.12949	4.47249	5.36983	8.96234	8.98702	8.3412	11.0437	10.156	9.87026
LE01Gene02145	0	3.11512	0	4.63053	3.60876	4.79031	3.57515	0	5.11855	0	0	0	4.43203	3.27768	3.50197	6.14857	5.22995	5.23884
LE01Gene02146	11.0839	11.4401	11.0186	9.95886	10.3589	9.83531	9.75215	10.1242	9.96051	11.0935	10.9409	10.7473	9.49862	9.63906	9.607	9.81662	9.7634	9.37006
LE01Gene02147	10.2077	9.87931	9.42231	9.62488	9.45897	9.67645	9.33902	9.68789	9.32659	9.01252	8.60133	9.0867	9.14034	8.79007	9.56236	9.45208	9.04584	9.37222
LE01Gene02148	11.93	11.9166	11.3314	10.1883	10.5974	10.0424	9.94738	10.3559	9.79138	11.9334	11.9693	11.7341	9.91129	9.74522	9.51223	9.52652	9.45431	9.42531
LE01Gene02149	9.00547	8.9355	8.96199	9.21234	9.12217	8.85184	9.00953	8.84456	9.16639	8.17162	8.67461	8.30716	8.97849	9.75171	9.35954	8.83505	9.32011	9.2876
LE01Gene02150	8.42946	8.58582	7.90316	7.12398	6.98863	7.56684	7.73679	7.79799	7.56946	8.48865	8.85357	8.92843	7.45928	8.1506	8.6796	7.9721	7.91687	7.98506
LE01Gene02151	7.31635	7.26951	8.13095	9.54929	9.64872	9.97431	9.60034	9.60361	9.95888	7.89985	8.25962	9.28169	12.8173	13.7998	13.2967	12.6138	13.5285	12.7782
LE01Gene02152	2.20151	0	3.46053	0	2.24281	0	0	3.22051	3.32157	0	0	2.332	0	0	0	0	0	2.31447
LE01Gene02153	5.68354	5.06929	5.72414	5.66127	6.3773	5.39091	6.08162	6.67093	6.69135	5.44997	6.07662	5.18216	5.33273	6.03895	6.48914	5.78257	6.57814	7.1904
LE01Gene02154	6.65663	6.98307	6.84211	8.27136	7.90643	8.12977	8.7127	7.56427	8.37844	7.82153	8.12666	7.94327	9.54273	9.64778	9.32742	8.9005	9.33698	9.52206
LE01Gene02155	12.3432	12.1787	12.4881	12.6709	12.3998	12.4416	12.6711	12.2201	12.4198	12.0043	12.145	11.9511	12.4785	12.0131	12.0428	12.2139	11.9133	12.5892
LE01Gene02156	8.37966	7.80266	8.69056	8.74437	9.227	8.8871	8.44785	9.28551	8.67688	7.69207	7.92406	7.88289	9.06673	8.90214	9.40201	8.76298	8.838	8.75556
[truncated: 9,483 more rows]

## Sheet: CAZyme gene
Gene ID	CAZy Annotation	Enzyme Desciption	Enzyme Class	Protein ID (JGI)	cs_1_a	cs_1_b	cs_1_c	cs_2_a	cs_2_b	cs_2_c	cs_3_a	cs_3_b	cs_3_c	ow_1_a	ow_1_b	ow_1_c	ow_2_a	ow_2_b	ow_2_c	ow_3_a	ow_3_b	ow_3_c
LE01Gene06108	AA1	laccase11	Multicopper oxidase	10912	10.1449	9.70811	10.2974	11.5085	11.1766	11.4352	11.5231	11.195	11.4257	9.79641	9.54282	10.3026	10.8445	10.9669	11.0118	11.1744	11.2551	11.7338
LE01Gene08330	AA1	laccase1	Multicopper oxidase	15850	8.87882	8.04172	8.23917	9.67681	9.72548	10.143	10.7247	10.2453	9.9959	7.04494	7.0865	6.47187	9.42982	9.45465	8.31336	9.4323	9.33218	9.87485
LE01Gene08149	AA1	laccase12	Multicopper oxidase	15576	10.1529	10.0481	9.58838	11.196	10.8525	12.759	11.5302	9.65849	12.256	9.61184	11.688	11.886	13.7235	11.8095	10.6447	11.2226	10.8169	10.2563
LE01Gene04737	AA1	laccase13	Multicopper oxidase	7336	5.34326	6.06838	5.53893	8.6731	8.11992	7.95803	7.18358	5.69953	9.62257	5.00287	7.09669	6.20223	9.91129	5.03969	5.17469	5.63655	4.62274	3.16163
LE01Gene04660	AA1	laccase14	Multicopper oxidase	7232	6.24207	6.96105	6.41981	9.90077	9.48174	9.27203	5.85847	6.4824	7.94358	8.02878	11.7612	12.3049	13.5454	7.2272	6.58539	5.98923	5.95979	6.62012
LE01Gene07443	AA1	laccase2	Multicopper oxidase	14433	8.60644	8.52333	8.45279	9.08085	8.99599	9.1198	9.74401	9.28311	9.63282	8.40022	8.52791	8.52034	9.23747	9.57835	9.23647	9.64009	9.34415	9.53564
LE01Gene07056	AA1	laccase3	Multicopper oxidase	13128	6.60421	7.08839	6.6065	6.31369	6.44068	7.0072	7.00433	6.57974	6.7377	6.38392	5.67551	6.53601	6.33158	5.95153	6.8665	6.14857	6.10197	6.56062
LE01Gene04008	AA1	laccase4	Multicopper oxidase	5018	9.20564	10.6499	9.49869	9.78724	9.37223	9.89137	10.6677	9.53851	10.2922	10.9913	10.5184	9.98267	10.6716	10.841	9.97149	10.8821	11.2853	9.83773
LE01Gene01372	AA1	laccase5	Multicopper oxidase	13785	13.582	12.9783	11.8736	12.8297	12.5015	11.5205	13.9102	12.7166	11.0015	14.3435	12.8621	11.0329	8.94327	9.28399	7.84093	9.21798	8.95818	9.4542
LE01Gene13044	AA1	laccase6	Multicopper oxidase	3933	5.43614	5.89341	6.59297	11.9838	12.1283	10.4187	13.3788	14.4844	8.31871	5.12829	8.54289	7.04591	7.50459	8.72894	8.39973	7.36858	8.88138	7.81726
LE01Gene07758	AA1	laccase7	Multicopper oxidase	14939	13.1973	13.3113	12.7271	11.5686	11.8477	11.551	11.2688	11.5496	11.5138	13.1013	13.0681	13.1236	11.9639	11.6783	12.6924	11.954	11.4769	11.5681
LE01Gene01361	AA1	laccase8	Multicopper oxidase	13764	8.11982	8.31343	8.52939	8.89604	9.1697	9.22688	8.72102	8.86079	9.20814	7.31497	6.53209	6.61236	8.45132	8.48616	7.60872	7.78374	8.66551	8.10444
LE01Gene04648	AA1	laccase9	Multicopper oxidase	7214	8.29538	8.26483	8.71576	9.60587	9.20207	9.93975	10.2842	9.83151	10.1538	9.33226	10.8391	10.8367	10.8066	10.3006	9.62031	9.93223	9.82109	10.0186
LE01Gene05032	AA1	laccase10	Multicopper oxidase	8844	11.4695	10.6274	10.3375	11.8182	12.1093	11.9943	12.0231	12.3399	12.1974	9.42889	9.03677	9.25811	10.2496	10.1796	10.024	10.8974	10.5128	11.1625
LE01Gene05238	AA14	.	.	9320	11.0574	11.415	10.6998	10.096	10.3486	9.92286	10.2342	10.422	10.175	10.8497	10.8497	10.4315	9.59951	10.2105	9.83131	9.85013	10.3714	9.95212
LE01Gene07498	AA14	.	.	14499	13.8703	13.728	12.9561	11.2545	11.5644	11.5326	10.6933	11.1059	10.8733	14.0165	14.2452	14.2645	11.6283	11.3078	11.7907	10.9632	10.8466	10.656
LE01Gene07497	AA14	.	.	14498	7.47801	6.68026	6.85351	7.29513	8.19076	7.67165	7.9987	8.36495	7.95671	7.44121	7.94113	7.58237	7.31414	7.30861	7.95342	6.90316	7.52921	6.96802
LE01Gene02669	AA14	.	.	20986	12.3063	12.1406	11.9801	10.9641	10.8742	11.149	10.2856	10.2711	10.3368	12.2836	12.3091	12.0974	10.7164	9.99519	10.4009	10.69	10.7715	10.0913
LE01Gene09060	AA2	Manganese peroxidase	Peroxidase	17561	8.6874	8.36884	7.70353	9.07256	8.64884	10.8202	8.85557	8.17553	9.78587	7.45724	7.72817	7.84542	9.50792	10.6872	9.74537	12.2203	11.6489	10.0282
LE01Gene08997	AA2	Manganese peroxidase	Peroxidase	17471	9.48104	9.48903	9.1836	13.8307	13.1076	15.2651	13.7817	10.7881	14.6136	9.95579	9.97314	10.358	14.3815	15.7151	13.5499	17.9895	17.0906	15.1075
LE01Gene03920	AA2	Other peroxidase	Peroxidase	4873	15.0171	15.2937	15.0177	11.9675	12.6636	12.0256	11.3508	13.1914	11.0935	15.4364	15.0455	14.946	12.1962	11.894	11.6892	10.6111	11.7772	10.7655
LE01Gene03530	AA2	Other peroxidase	Peroxidase	.	7.62336	7.15779	8.13095	8.67675	8.43984	8.8157	8.90752	8.48289	8.4074	6.88825	6.59096	6.50429	8.1285	7.60205	8.00074	8.46283	8.63853	8.61274
LE01Gene10965	AA2	Versatile peroxidase	Peroxidase	21782	7.98796	7.33945	6.88717	8.38276	7.31041	7.90741	8.80559	7.96344	8.35385	7.3668	7.5393	7.38754	8.11882	8.08021	8.17584	8.90688	8.26305	8.73888
LE01Gene04232	AA3_1; AA8	Cellobiose dehydrogenase	GMC oxidoreductase	6040	7.07773	7.33089	7.62591	11.6773	8.51906	7.80667	13.038	11.4971	11.1617	7.32374	7.74771	7.43036	7.22671	8.43873	7.43877	7.03724	7.20083	12.1842
LE01Gene12439	AA3_2	glucose oxidase	GMC oxidoreductase	2656	10.2909	10.5812	9.9944	8.88662	9.21345	9.08732	8.68745	9.00212	9.18881	10.2004	10.6296	10.2852	9.77309	9.5414	9.15517	9.43008	9.59123	9.46438
LE01Gene14012	AA3_2	Oxygen-dependent choline dehydrogenase	GMC oxidoreductase	6405	10.9636	11.2556	11.3621	10.8772	11.1561	10.964	11.2481	11.0568	11.1744	10.7062	10.2953	10.5014	11.4169	11.7943	11.3152	11.0963	11.8877	11.1737
LE01Gene06189	AA3_2	dehydrogenase mpl7	GMC oxidoreductase	11049	9.21877	9.89682	9.86525	9.78555	10.2766	10.1023	9.67289	9.97559	9.59556	8.14713	8.53542	7.83907	7.92691	8.61621	7.30381	7.79067	8.30286	7.35704
LE01Gene12448	AA3_2	dehydrogenase mpl7	GMC oxidoreductase	2670	10.5336	10.4099	10.6895	11.37	11.5165	11.6654	11.6352	11.5818	11.5199	10.1679	10.3634	10.6346	11.4621	11.389	11.6382	11.4883	11.1383	11.5049
LE01Gene08704	AA3_2	L-sorbose 1-dehydrogenase	GMC oxidoreductase	16977	11.3803	11.3095	11.4775	10.2618	10.7945	10.4826	10.2122	10.6036	10.5003	11.3053	11.1209	10.9827	10.4366	10.1541	10.2982	10.1389	10.085	10.046
LE01Gene05485	AA3_2	Oxygen-dependent choline dehydrogenase	GMC oxidoreductase	9789	8.63937	8.38546	8.63552	8.78887	8.26267	8.91299	8.18464	8.11186	8.2564	8.22408	8.6575	8.4304	8.40826	7.09066	7.19615	7.50107	7.2627	7.3916
LE01Gene07717	AA3_2	.	GMC oxidoreductase	14873	13.8692	13.4766	14.2639	12.2889	13.9976	12.7257	11.828	13.9998	12.2702	12.4263	13.0543	12.3898	12.6152	12.5539	13.5211	12.5382	12.5332	11.1612
LE01Gene13764	AA3_2	Oxygen-dependent choline dehydrogenase	GMC oxidoreductase	5763	7.21514	7.14808	8.37979	9.93773	10.9886	10.4544	10.7391	10.9808	11.0891	7.96295	8.48587	8.35684	11.7418	11.9093	11.5868	11.8129	11.0179	10.4138
LE01Gene03892	AA3_2	.	GMC oxidoreductase	4827	8.37966	8.11833	8.52939	8.58655	8.30159	8.54106	8.74569	8.20125	8.37844	8.35816	7.25979	7.30712	8.15242	9.06198	8.35036	8.44977	9.03701	8.12513
LE01Gene07753	AA3_2	dehydrogenase	GMC oxidoreductase	14927	10.745	10.6395	10.9762	11.1573	12.7939	11.71	11.3588	13.4836	11.9996	9.21932	9.42642	9.6779	10.9147	11.0047	11.8149	10.874	11.0164	10.2504
LE01Gene03487	AA3_2a	aryl-alcohol oxidase	GMC oxidoreductase	3158	13.2352	12.7089	13.1035	13.5464	13.1927	13.6945	13.6189	12.7141	13.7391	12.4677	12.9242	14.8054	13.5819	13.4377	16.274	14.1883	13.5733	14.8487
LE01Gene04820	AA3_2a	aryl-alcohol oxidase	GMC oxidoreductase	7630	9.8759	10.1635	10.8889	13.9576	13.6283	13.8904	14.5263	13.9724	14.6587	8.7088	8.88625	8.81991	12.475	13.0655	13.6476	13.6735	13.9581	13.6258
LE01Gene04836	AA3_2a	aryl-alcohol oxidase	GMC oxidoreductase	7661	7.0486	6.72013	7.79502	11.0657	10.3088	11.3222	12.6576	11.6729	12.6566	6.18655	6.60531	6.75393	8.91558	9.76779	9.1785	11.3268	11.1615	11.3521
LE01Gene07087	AA3_2a	aryl-alcohol oxidase	GMC oxidoreductase	13168	10.1194	9.78689	9.75259	10.5493	10.1087	10.5007	10.1489	10.3259	10.442	9.76617	9.97037	10.4924	10.9014	10.5646	10.9339	10.7427	10.4366	10.7761
LE01Gene09147	AA3_2a	aryl-alcohol oxidase	GMC oxidoreductase	17698	11.0561	11.9141	11.4284	8.39167	8.84606	8.40983	8.8706	9.03396	8.63668	13.2614	12.5488	12.807	9.26626	8.97875	9.52442	9.10035	8.80373	8.33054
LE01Gene13226	AA3_2a	aryl-alcohol oxidase	GMC oxidoreductase	4405	13.1041	12.8378	12.5304	12.2249	12.4703	12.1545	12.0548	12.3502	12.051	12.9577	13.1501	13.2896	12.9319	13.2421	13.555	13.0137	13.2601	12.6611
LE01Gene04010	AA3_2a; AA8	aryl-alcohol oxidase	GMC oxidoreductase	5022	8.00827	7.70667	7.02457	9.01609	8.78632	8.92151	9.37374	8.67135	9.98953	7.64387	8.57969	8.08935	9.275	10.3644	9.712	10.5715	10.0327	10.2001
LE01Gene09156	AA3_2a; AA8	aryl-alcohol oxidase	GMC oxidoreductase	17712	9.999	11.4053	10.3646	8.57486	8.50059	8.54474	8.74161	8.49542	8.70826	12.5666	11.7337	11.9161	8.6988	9.01154	8.63157	8.64572	9.10051	8.3873
LE01Gene07621	AA3_2b	glucose oxidase	GMC oxidoreductase	14695	11.7454	10.9908	13.0193	16.3003	14.614	15.8401	16.2516	13.3931	16.8739	9.76777	10.0591	9.7824	15.0507	15.3749	11.4871	16.7186	16.3027	15.3074
LE01Gene09425	AA3_2b	glucose oxidase	GMC oxidoreductase	18550	11.2098	11.0867	11.1117	9.77708	10.5896	10.0809	10.2093	10.9808	10.1524	10.5929	10.4464	10.5633	10.2137	9.81499	10.0081	10.0188	9.95673	10.0089
LE01Gene08340	AA3_3	alcohol oxidase	GMC oxidoreductase	15867	8.40669	9.41605	8.96987	8.11343	7.95608	8.17326	8.24934	8.12804	8.19682	10.318	9.02881	8.62357	8.15242	8.75176	8.79816	8.16021	8.77217	8.67719
LE01Gene08342	AA3_3	alcohol oxidase	GMC oxidoreductase	15872	6.95753	6.93869	6.07508	7.69833	7.68878	7.53755	7.60814	7.61873	8.1689	6.38392	5.67551	6.33435	7.15274	7.25485	7.71892	7.59104	7.40668	7.23865
LE01Gene09192	AA3_3	alcohol oxidase	GMC oxidoreductase	17765	10.4682	11.198	11.5193	8.05296	9.22475	7.78191	7.92139	10.9217	7.4539	12.7276	12.2308	11.8596	9.66749	10.0632	9.11542	8.92587	9.70517	8.89758
LE01Gene10868	AA3_3	alcohol oxidase	GMC oxidoreductase	21625	14.3414	13.6403	15.1783	14.1812	14.1548	14.5876	14.7867	13.5145	16.09	14.0497	14.6554	14.9285	16.726	18.0692	17.254	18.4074	18.3592	16.8573
LE01Gene02678	AA3_4	Pyranose oxidase	GMC oxidoreductase	21001	11.0941	10.8171	11.6039	16.493	15.7679	16.6601	16.3982	14.9056	16.3369	11.0832	9.77476	11.3203	15.5079	14.2399	14.2549	14.4732	14.0732	16.2247
LE01Gene07237	AA4	vanillyl-alcohol oxidase	Lignin Degrading Auxiliary enzyme	.	12.6861	12.5218	12.6282	12.1346	12.2782	12.1861	12.3758	12.2226	12.2098	12.5661	12.2389	12.2168	11.7707	11.5883	11.4803	11.8398	11.7537	11.592
LE01Gene11889	AA4	vanillyl-alcohol oxidase	Lignin Degrading Auxiliary enzyme	.	8.9488	8.92701	9.43754	9.22734	9.3702	8.98527	9.35515	9.78634	9.49121	9.01793	8.27316	8.55171	8.97313	8.95928	9.05226	9.39191	9.21969	9.1581
LE01Gene02092	AA5_1	Glyoxal oxidase	copper radical oxidase	17840	11.6701	11.4129	11.6815	13.2706	12.4235	13.7887	13.7785	12.2087	14.5325	9.38138	9.00466	9.04873	13.8627	14.4687	12.7863	16.8602	15.7012	14.1584
LE01Gene04633	AA5_1	Glyoxal oxidase	copper radical oxidase	7193	14.9826	14.7306	14.3727	13.5697	13.7963	13.7459	13.6927	13.7192	13.9874	15.0195	15.1921	15.2108	14.4923	14.5368	14.5721	14.5215	14.3102	14.2462
LE01Gene04793	AA5_1	Glyoxal oxidase	copper radical oxidase	7588	10.9707	11.4002	11.373	11.8036	13.178	12.0948	12.2847	13.7415	12.4043	10.4689	10.211	10.1132	11.3895	11.7002	11.2887	11.6008	11.5988	12.9825
LE01Gene12661	AA5_2	Galactose oxidase	copper radical oxidase	3000	13.1569	12.9437	12.552	11.2237	11.2558	11.4066	11.1052	11.0333	11.5065	13.3477	13.6967	13.6233	12.1873	11.9876	11.8149	12.4925	11.8216	11.56
LE01Gene12732	AA5_2	Galactose oxidase	copper radical oxidase	3098	6.15365	6.314	6.13234	6.4045	6.01043	5.86176	6.48483	5.93848	6.35716	4.04717	5.67551	5.01219	5.5209	6.34367	5.6605	5.69675	5.18805	5.41715
LE01Gene05328	AA6	Benzoquinone reductase	NADPH-dependent FMN reductase	9473	9.22746	8.89833	9.32129	11.4083	10.9026	11.7485	11.4851	10.411	11.4624	8.15206	8.23214	8.07323	10.8613	12.4765	10.8444	12.4146	13.4909	10.4043
LE01Gene10171	AA6	Benzoquinone reductase	NADPH-dependent FMN reductase	20145	14.8619	14.7323	13.9915	14.3726	13.5843	13.8826	13.7661	13.3174	13.3729	12.1488	12.705	12.1428	13.036	13.1797	13.229	13.1751	13.665	13.7116
LE01Gene02931	AA7	glucooligosaccharide oxidase	Lignin Degrading Auxiliary enzyme	.	12.1897	11.4686	10.0363	9.85964	9.29073	9.53542	9.58446	9.22661	9.31645	13.6517	12.9422	12.5945	10.3104	10.341	10.0537	10.1253	9.63672	9.85176
LE01Gene13975	AA7	glucooligosaccharide oxidase	Lignin Degrading Auxiliary enzyme	.	13.7608	13.9452	12.8016	10.7906	9.79382	10.8368	11.5057	10.3317	12.7791	14.8703	15.2181	14.583	13.8539	15.1495	13.2764	14.7204	15.4922	13.8712
LE01Gene00046	AA7	glucooligosaccharide oxidase	Lignin Degrading Auxiliary enzyme	.	10.6169	10.0177	10.5362	11.2733	10.8539	10.6848	10.3366	10.341	10.1089	10.2701	10.34	10.4378	10.3575	10.8072	10.4336	10.954	11.4389	11.9568
LE01Gene02763	AA7	glucooligosaccharide oxidase	Lignin Degrading Auxiliary enzyme	21140	11.654	11.8413	11.8349	11.0712	11.5193	11.1772	10.9955	11.7572	11.3874	12.0712	11.9504	12.2617	11.5709	11.4977	11.8083	10.9686	11.2846	11.0966
LE01Gene06745	AA7	.	.	.	6.4933	6.14851	6.25772	8.41806	6.95647	7.93013	8.50678	7.48273	8.23502	7.34973	5.94741	8.31175	9.049	9.71899	9.39759	9.85674	9.55666	8.78185
LE01Gene08676	AA7	.	.	.	6.91513	6.79672	7.25687	8.57095	8.42033	8.54474	9.08881	8.10097	8.57845	7.54984	6.91278	6.89512	8.00256	8.06468	7.29435	8.07773	8.35587	8.53372
LE01Gene06192	AA7	.	.	.	8.98512	10.1802	9.13306	8.61725	9.0065	8.46532	8.72929	9.80827	9.22179	10.8708	10.8123	10.6374	9.2172	9.90063	10.4163	9.12794	9.94577	8.18545
LE01Gene09065	AA7	FAD-linked oxidoreductase	.	17572	11.4125	12.2068	11.0027	5.97749	5.22491	6.32302	5.31549	5.14261	5.02198	13.085	13.3859	13.4955	8.9865	10.6054	8.00654	8.05492	10.9044	6.16072
LE01Gene10788	AA7	.	.	.	7.03876	7.23322	8.33171	10.178	11.2508	11.2675	11.9081	11.5685	11.9948	7.1669	7.61925	7.32538	12.2373	13.2692	11.6678	12.2445	12.6044	12.4112
LE01Gene00047	AA7	.	.	.	11.7294	11.7762	12.3234	12.4059	13.495	12.6974	12.5956	13.7351	12.6913	11.6042	11.7862	11.6636	12.6538	12.4936	13.1729	12.4714	12.368	13.5647
LE01Gene00015	AA7	.	.	.	6.96794	6.88123	7.26543	8.29529	9.0978	8.6477	8.16648	7.87032	7.88987	6.6158	7.20431	6.35228	8.43971	8.76785	7.56217	8.02588	9.4697	10.6613
LE01Gene06800	AA7	.	.	.	10.2338	10.452	10.288	10.6135	10.5307	10.4476	10.7381	10.8258	10.8629	11.1642	11.2389	11.1521	10.985	10.6081	10.7907	10.5624	10.5213	10.5191
LE01Gene04395	AA7	.	.	.	10.0091	10.5893	9.92318	8.91469	10.6436	9.37497	9.42301	11.108	9.88186	9.90264	9.56868	9.38977	9.39616	10.207	9.95507	9.49297	10.4522	9.30583
LE01Gene05597	AA7	.	.	.	7.70651	7.96635	7.83006	8.23718	9.42215	7.99621	9.86906	11.4683	8.77274	7.51963	8.05005	6.75393	9.62538	10.3269	11.4103	10.0976	10.1244	8.05679
LE01Gene02255	AA9	Lytic polysaccharide monooxygenase	Cellulase	18127	8.00322	7.61093	7.15923	12.229	8.89779	7.63755	12.1274	10.9726	9.91753	5.91205	6.80501	6.93134	6.57756	7.51326	6.97709	7.22267	6.94815	11.5676
LE01Gene03338	AA9	Lytic polysaccharide monooxygenase	Cellulase	2236	11.3438	11.2044	11.1034	9.89452	9.90894	10.0437	9.53105	9.83808	9.95888	11.3371	11.5169	11.2232	10.2057	10.6408	10.2015	9.79096	10.5318	9.79481
LE01Gene06603	AA9	Lytic polysaccharide monooxygenase	Cellulase	12376	9.30134	9.30462	8.83553	13.1498	10.731	10.0358	15.2202	13.3895	12.8284	8.83989	8.84754	9.20485	9.53	9.74685	9.88588	9.42119	9.81765	13.7864
LE01Gene08464	AA9	Lytic polysaccharide monooxygenase	Cellulase	16601	12.9567	12.8315	12.2281	11.948	12.1734	12.1887	11.5117	12.0771	11.9393	13.3594	13.6375	13.4998	12.5586	12.4184	13.0585	12.4415	12.2078	12.4271
LE01Gene08665	AA9	Lytic polysaccharide monooxygenase	Cellulase	16904	9.6602	9.69316	9.49324	9.7287	9.60616	9.68649	9.74197	10.0791	9.89556	9.76133	10.1802	10.5681	10.3606	10.5811	10.8082	10.2013	10.349	10.4491
LE01Gene08744	AA9	Lytic polysaccharide monooxygenase	Cellulase	17040	14.6083	14.2527	14.1422	14.0611	13.892	14.126	13.8694	13.5772	14.0433	14.6347	14.8526	14.9893	15.0622	15.0326	14.9675	14.58	14.4828	14.744
LE01Gene10266	AA9	Lytic polysaccharide monooxygenase	Cellulase	20316	5.52341	5.29729	4.7266	12.8611	8.26704	5.32388	15.6152	13.4284	12.9008	4.04717	4.03722	4.767	5.03628	4.04116	3.74362	5.21065	5.14489	11.2743
LE01Gene12659	AA9	Lytic polysaccharide monooxygenase	Cellulase	2994	11.507	11.6835	11.875	11.3398	11.4176	11.3697	11.0377	10.8536	11.1807	11.1189	11.1265	11.0245	11.0533	10.9711	10.8701	10.6257	11.1035	11.0775
LE01Gene14047	AA9	Lytic polysaccharide monooxygenase	Cellulase	6441	13.4287	13.4935	13.1611	11.5136	11.6087	11.7194	10.9782	11.1828	11.2063	13.7881	13.7965	13.8093	12.017	11.6	12.1831	11.4941	11.9987	11.1718
LE01Gene05218	AA9-CBM1	Lytic polysaccharide monooxygenase	Cellulase	9208	7.6751	7.27844	7.41136	13.4114	10.0854	7.94136	15.9958	14.1393	13.3547	7.35829	7.87752	7.31628	7.8761	7.65143	7.87941	7.6607	7.51233	15.2167
LE01Gene09248	AA9-CBM1	Lytic polysaccharide monooxygenase	Cellulase	18308	6.77989	7.26052	6.68514	11.2392	7.70177	7.46939	14.0395	12.943	11.136	7.23356	7.56889	7.75399	8.97313	9.2929	8.9139	8.61875	8.88794	14.7279
LE01Gene09249	AA9-CBM1	Lytic polysaccharide monooxygenase	Cellulase	18311	5.80462	6.06838	6.01546	13.1896	9.73183	6.6854	15.1227	13.3097	13.5608	6.58695	6.15675	7.00117	6.88223	7.37731	7.67585	7.18113	7.19026	11.9893
LE01Gene01411	CBM1	Fungal cellulose binding domain	Cellulase	13856	8.34813	8.75212	8.76788	11.5876	8.62175	7.96355	13.2224	11.3153	11.1723	7.75825	8.38551	8.32542	6.92729	6.92843	7.01214	6.31143	6.626	12.9945
LE01Gene01726	CBM12	Carbohydrate binding domain Protein of unknown function (DUF3421)	.	16029	13.1389	12.6803	13.8257	16.7337	15.9645	16.5351	16.1861	15.106	16.0322	12.38	12.8055	13.2918	16.2803	15.5771	15.4145	15.1584	15.1939	16.6792
LE01Gene06860	CBM13	Ricin-type beta-trefoil lectin domain-like	.	12817	16.8738	17.4938	17.9441	17.1187	16.6827	17.1775	15.8966	14.6219	15.8179	17.2567	16.3861	16.7049	16.6949	16.4479	14.7589	15.282	16.0227	17.3212
LE01Gene10858	CBM13	Ricin-type beta-trefoil lectin domain-like	.	21601	14.5448	14.9532	14.5773	12.3629	12.7871	12.6993	12.0776	12.6852	12.436	15.0933	15.2041	15.162	13.7722	15.1773	13.4863	12.6813	15.2297	14.2004
LE01Gene05981	CBM21	.	.	.	10.2467	10.0468	10.2859	11.4659	11.3736	11.1961	11.7387	11.7804	11.0298	11.1265	11.9267	11.5975	11.2711	11.8134	10.7393	10.5745	11.9169	11.6715
LE01Gene06320	CBM21	Carbohydrate/starch-binding module (family 21)	.	11866	11.2305	11.1538	10.4711	9.37612	10.3341	9.6798	8.95766	10.8705	9.79503	11.7621	12.2145	12.4009	10.697	11.2246	11.6883	10.7157	10.7509	9.88549
LE01Gene10124	CBM5	Carbohydrate binding domain	.	20069	5.52341	5.52448	6.38882	9.5982	8.78632	8.86958	10.446	9.19879	9.62668	3.86694	0.1	4.96637	7.70551	5.56648	5.90391	5.40359	5.14489	9.29446
LE01Gene11855	CBM50	LysM domain	.	1366	15.1351	15.1686	14.7545	14.7168	14.9091	14.742	14.856	15.2096	15.1129	15.3652	15.2714	15.1949	14.7302	15.1695	15.6857	15.1002	15.3839	15.3482
LE01Gene13151	CBM50	LysM domain	.	4307	4.43947	5.82191	4.39346	6.96599	6.16853	6.96382	6.73535	5.83713	7.05081	3.76761	4.03722	4.71254	5.83653	6.39427	5.80076	6.34943	5.98448	5.87347
LE01Gene03816	CBM50	LysM domain	.	4253	10.5327	11.0842	11.0268	10.512	10.6156	10.6103	10.8832	10.7256	10.9483	10.702	10.5677	10.3635	10.4081	10.6702	10.4141	10.6487	10.9876	11.0841
LE01Gene03893	CBM50	LysM domain	.	4828	14.0689	13.8689	15.0578	13.6567	13.0518	13.6688	12.8484	11.2527	14.6029	13.1947	13.0608	12.0957	13.5829	13.335	12.2716	14.6275	15.0174	14.4174
LE01Gene04217	CBM50	LysM domain	.	5685	8.35608	8.19579	9.75564	7.73379	8.86928	8.53366	7.29922	7.59565	8.41217	8.2565	8.11166	7.20232	8.84688	8.39384	7.85387	8.72735	13.0617	9.84399
LE01Gene04605	CBM50	LysM domain	.	7129	11.8479	12.1187	11.7483	8.53924	8.76172	8.7048	8.83272	8.42294	9.70069	12.3235	13.538	13.0034	9.02846	10.2234	9.04945	11.5131	12.3239	12.4585
LE01Gene08448	CBM67	.	.	16581	10.7028	10.6525	12.3339	14.4723	15.3347	15.0448	15.2902	16.2147	15.2275	9.90848	10.4603	9.34124	14.069	14.288	13.4273	14.1368	14.7363	13.9916
LE01Gene03573	CBM67	.	.	3335	8.5452	8.2238	8.00376	9.26902	9.19059	9.41175	9.20902	9.68607	9.89556	8.6715	9.13153	8.22199	10.4939	10.1566	9.95657	10.3851	9.79864	10.1468
LE01Gene11861	CBM67	.	.	1377	14.7801	14.1924	16.0141	16.8039	17.5312	17.3731	17.2429	17.6376	17.5051	12.0986	12.4429	11.5556	15.9372	16.5128	14.6242	15.8054	16.6273	16.1759
LE01Gene00476	CE1	Feruloyl esterase	.	.	10.5079	10.7196	11.415	13.1227	12.8073	12.9744	13.1616	12.7976	12.9246	10.1605	10.134	10.4357	12.5523	12.6208	12.3607	12.5052	12.783	13.0318
LE01Gene00339	CE12	GDSL-like Lipase/Acylhydrolase	.	635	10.6997	11.0336	10.9808	11.169	10.7238	10.5242	11.1068	10.6104	10.7693	10.9186	10.9044	10.9668	10.9189	11.322	10.8452	11.0581	10.9364	11.7228
LE01Gene06888	CE12	GDSL-like Lipase/Acylhydrolase	.	12860	9.01804	8.45801	8.16336	11.7881	10.1847	9.80029	11.1521	9.7965	10.6309	7.10721	7.85968	7.86427	8.88164	7.60205	8.39088	8.94461	7.73238	11.5784
LE01Gene11487	CE15-CBM1	glucuronoyl methylesterase	Hemicellulase	22988	8.77891	8.97174	9.21707	11.1991	10.3267	10.8525	12.6911	11.2311	12.736	8.49643	7.9524	8.06238	9.77618	9.78844	9.40201	12.5755	10.5812	11.8756
LE01Gene00833	CE16	GDSL-like Lipase/Acylhydrolase	.	8417	9.44982	9.88955	9.5591	10.1122	10.0285	10.47	10.135	10.2254	9.84705	10.0327	9.64533	9.30948	9.99172	9.30618	9.234	9.15232	8.92986	10.2575
LE01Gene02485	CE16	GDSL-like Lipase/Acylhydrolase	.	19658	9.48648	9.64045	9.51134	9.4966	9.09288	8.75656	9.13624	9.55855	9.81138	9.38558	9.29094	9.26522	8.68902	8.47837	10.3413	10.615	8.9951	9.8346
LE01Gene06651	CE16	.	.	.	9.33389	10.0097	9.42422	10.0404	9.05034	8.72767	8.97168	8.22652	9.2054	9.06837	9.07594	9.47609	9.09909	8.755	8.88897	9.96931	9.27077	10.4945
LE01Gene03376	CE16	.	.	.	10.0477	10.1767	10.6598	11.3387	10.6352	11.0777	11.2292	10.2589	11.3052	9.77259	9.50122	10.125	11.7216	11.2568	11.2482	12.0773	11.5392	12.4203
LE01Gene12173	CE16	GDSL-like Lipase/Acylhydrolase	.	1857	8.01331	7.50839	6.78375	11.7877	9.97465	9.70801	11.5779	10.1731	11.4162	3.95987	6.60531	7.48824	8.88735	6.96237	9.97	10.5924	8.34637	12.2183
LE01Gene11542	CE16	GDSL-like Lipase/Acylhydrolase	.	23074	10.5536	9.79314	9.97887	13.1038	11.2635	11.5597	13.9573	12.1339	13.5716	8.22408	8.78903	9.30948	9.8409	9.16758	9.95957	10.8452	9.70145	13.08
LE01Gene11041	CE16	GDSL-like Lipase/Acylhydrolase	.	21905	6.65663	7.4777	7.15002	11.7362	9.07801	8.09501	13.7018	11.9333	11.7115	6.80302	6.05588	7.0893	7.19942	7.16054	7.404	6.44026	6.83051	11.7237
LE01Gene05798	CE17	.	.	.	12.6335	12.5437	12.0965	11.2769	11.5551	11.335	11.2285	11.6166	11.4097	12.8333	12.8652	12.8657	11.7544	11.7492	11.844	11.8268	11.185	11.3673
LE01Gene12023	CE17	.	.	.	12.1793	11.9571	11.4734	11.1677	11.0977	10.9516	10.9342	11.3685	11.2145	12.616	12.5207	12.6474	11.2284	10.9072	11.3709	11.7089	10.9808	11.0186
LE01Gene12021	CE17	.	.	.	11.9214	11.7751	11.5827	9.01609	9.91313	9.3457	8.76995	9.43174	8.73896	11.6723	12.0234	12.2498	10.1722	9.22928	9.74537	8.78394	9.22747	9.31035
LE01Gene12496	CE1-CBM1	acetylxylan esterase	Hemicellulase	2748	7.39559	7.39799	7.12202	12.5177	8.98806	7.96355	14.2574	12.8716	13.0609	6.86441	7.10681	7.33443	7.73749	8.56191	8.63157	11.844	9.17748	15.1111
LE01Gene01029	CE3	.	.	.	8.01331	7.68669	8.0785	12.4638	10.4985	10.2153	14.0345	11.7671	12.7405	6.93478	6.50173	7.0893	8.9542	8.45868	8.90771	8.7735	8.40699	12.1755
LE01Gene11812	CE4	Chitin deacetylase	Chitinase	23538	14.9705	14.9165	14.3131	13.1429	13.1927	12.9814	13.0109	13.1914	13.5447	15.2256	15.2698	15.253	13.7534	13.6161	13.7864	13.982	13.3105	13.8031
LE01Gene08069	CE4	Chitin deacetylase	Chitinase	15452	12.5207	12.2256	12.2251	12.7587	12.6599	12.775	12.7806	12.4077	12.7317	12.6855	12.51	12.8665	13.1765	13.2896	12.9789	12.4612	12.9696	13.1529
LE01Gene01633	CE4	Chitin deacetylase	Chitinase	14259	13.7445	13.7733	12.6719	9.72341	9.44358	9.41377	9.10479	8.98741	9.30879	14.5919	14.5538	14.6406	11.6966	11.262	10.5575	10.3805	11.1286	10.4855
LE01Gene02924	CE4	Chitin deacetylase	Chitinase	22389	15.2028	15.2713	15.4233	13.6401	14.7825	14.0223	13.5034	14.9006	13.7498	14.9801	14.5285	14.6234	14.5876	14.7276	14.745	13.7194	14.4181	14.0035
LE01Gene06517	CE4	Chitin deacetylase	Chitinase	.	8.20588	8.31777	8.05401	11.2118	10.6802	11.3614	12.1976	10.9912	12.7897	7.75825	8.12666	8.37449	11.7244	12.3828	11.9797	12.9252	13.3356	12.1854
LE01Gene03525	CE4	Chitin deacetylase	Chitinase	3236	12.6882	12.9599	13.3276	11.6859	13.49	12.401	11.4636	12.5008	12.9296	13.3918	13.3843	13.5383	12.6225	12.5546	13.2488	12.6289	13.2881	11.5943
LE01Gene03495	CE4	Chitin deacetylase	Chitinase	3173	9.91273	10.9453	10.0974	6.58617	7.48591	7.16873	7.49627	7.64146	7.90349	11.183	12.4185	11.6041	8.39629	9.79316	9.52037	8.22807	9.80904	8.2291
LE01Gene13523	CE4	Polysaccharide deacetylase	Chitinase	5177	9.21003	9.31333	9.9353	9.87083	12.1326	10.5261	9.64693	12.0312	10.6319	7.48095	7.02378	6.83265	6.69947	9.99656	8.43891	7.40512	10.8297	8.65247
LE01Gene14061	CE8	pectinesterase	Pectinase	6464	10.0464	9.9241	10.1446	11.1845	10.0792	9.85918	10.8561	10.1269	10.374	10.2087	10.3096	10.4669	10.178	9.8577	10.2316	11.0085	9.7776	12.0019
LE01Gene06029	CE8	pectinesterase	Pectinase	10797	7.64946	7.62501	7.34024	10.187	8.3101	7.10027	9.07913	7.76388	8.4728	5.84053	6.85391	8.07862	8.54466	6.14126	7.10166	7.69061	5.42296	9.2876
LE01Gene04913	CE8	Pectinesterase	Pectinase	8664	9.04533	8.4422	9.26905	10.3072	9.25371	9.75648	9.84262	8.61123	10.2792	7.29727	8.84149	8.8643	10.3104	9.85167	10.1913	11.9682	10.2846	11.7593
LE01Gene13133	CE9	.	.	.	8.29538	8.55307	8.32354	9.27385	8.14868	8.55208	9.19117	8.66767	8.76903	8.96567	8.73785	8.4304	8.78089	9.0827	8.89525	9.42342	9.65029	9.205
LE01Gene02107	CE9	Amidohydrolase family PF13147	.	17870	10.1311	9.89827	10.0161	11.59	11.1795	11.2847	12.1073	11.356	11.6197	9.73199	9.57781	10.2086	10.6608	10.5783	11.0254	10.4962	10.485	11.2633
LE01Gene01365	GH1	beta-glucosidase	Cellulase	13771	11.5741	10.8924	10.9821	12.7881	11.3067	11.1742	14.3369	13.0472	13.0649	10.0125	11.1814	10.7515	10.4317	10.4812	10.4635	10.4663	10.5629	14.5694
LE01Gene06300	GH1	beta-glucosidase	Cellulase	11826	10.8758	10.416	11.8295	12.4179	12.3488	12.5407	12.9501	12.2847	13.226	9.37296	9.7604	9.47609	11.745	11.6702	10.7575	12.6618	11.8445	11.9525
LE01Gene13984	GH1	beta-glucosidase	Cellulase	6363	8.74602	8.97449	8.80943	9.30483	10.3309	8.86958	9.85212	10.4394	9.15505	8.12723	8.56141	8.5084	8.64923	9.93522	9.46451	8.79086	10.156	9.13789
LE01Gene02639	GH10-CBM1	endo-1,4-beta-xylanase	Hemicellulase	20944	8.79068	8.55307	8.78584	10.7694	10.1472	10.645	10.7884	9.99924	11.2609	7.53481	7.79229	8.15209	10.7019	9.83803	10.1669	12.2922	10.4377	11.8303
LE01Gene01030	GH105	rhamnogalacturonyl hydrolase	Pectinase	.	12.438	12.3021	12.3551	12.8651	13.0031	12.7032	13.5175	13.1604	13.1378	11.9712	11.8654	11.9028	11.8346	12.1431	12.0179	12.0502	12.3889	12.5754
LE01Gene05486	GH105	.	.	.	10.6095	10.3936	10.3864	11.2936	10.7514	11.0456	11.7102	10.8896	11.2308	11.0239	10.7023	10.6894	10.7815	10.7605	10.2887	10.4792	10.536	10.6435
LE01Gene10169	GH105	.	.	.	10.0066	9.93826	10.7616	11.9404	11.3532	12.0253	12.0719	10.8713	12.2682	9.21932	9.13895	9.54394	11.2424	11.3182	10.6986	11.541	11.3233	11.5059
LE01Gene01413	GH105	Unsaturated rhamnogalacturonyl hydrolase	Pectinase	13860	6.94704	6.85758	7.89215	9.53328	8.30159	8.95513	8.51158	7.38736	8.96358	6.52747	7.24153	6.48817	8.91279	8.79635	8.3412	10.1212	8.87479	9.01582
LE01Gene11733	GH105	.	.	.	11.3739	11.2109	11.3445	11.1183	10.9145	11.2205	11.0319	10.7932	11.0467	11.6507	11.8751	11.9225	11.3109	11.4199	11.5747	11.2803	11.2218	11.351
LE01Gene12252	GH106	alpha-L-rhamnosidase	Pectinase	.	10.0217	9.50053	10.3304	12.019	11.0246	11.9214	11.8242	10.715	12.8693	9.71709	10.3227	9.67256	11.394	11.8013	10.907	12.7244	12.4547	12.376
LE01Gene12253	GH106	.	.	.	10.6062	10.2825	10.5951	11.8074	11.3812	11.8551	12.0941	11.6622	12.0402	10.0696	9.82314	10.195	11.6098	11.5101	11.1421	11.856	11.6192	11.7015
LE01Gene03600	GH109	.	.	.	10.3156	10.2969	10.4126	10.4769	10.1099	9.97568	10.0859	10.0846	10.3666	10.9193	11.3728	10.8296	10.6856	10.7541	10.2982	11.048	10.4676	10.4875
LE01Gene03601	GH109	.	.	.	8.0963	8.41005	8.39936	7.92996	7.82565	7.76305	7.46689	7.87672	7.88987	8.31484	8.03952	8.13666	7.76257	7.69918	7.76761	7.28282	7.13619	7.45015
LE01Gene03223	GH10-CBM1	endo-1,4-beta-xylanase	Hemicellulase	1242	8.66838	7.77768	7.93569	12.8526	10.3414	9.47877	13.3283	11.8426	12.4442	7.13736	7.1661	7.80043	8.50061	8.71242	8.62025	8.81142	8.69946	13.2595
LE01Gene07975	GH10-CBM1	endo-1,4-beta-xylanase	Hemicellulase	15302	6.1353	6.56819	6.01546	9.82554	7.39283	7.46939	10.9333	10.1899	9.61224	6.63001	6.74147	6.24123	7.2535	7.51326	7.5222	7.66823	8.09749	12.9361
LE01Gene02619	GH11-CBM60	endo-1,4-beta-xylanase	Hemicellulase	20909	7.64298	7.26951	6.94157	9.73746	8.13437	6.89621	9.49026	8.20125	7.35826	7.3668	7.01306	6.72671	7.04442	6.87003	6.53807	6.71223	6.59427	7.86722
LE01Gene05655	GH115	xylan alpha-glucuronidase	Hemicellulase	10133	10.9604	10.2225	11.6018	11.7466	11.6301	11.9175	11.8188	11.5264	12.4621	9.53653	10.2227	10.3424	11.6978	11.3739	11.9039	14.4381	12.2357	13.4757
LE01Gene11493	GH11-CBM1	endo-1,4-beta-xylanase	Hemicellulase	22997	7.2834	7.92713	7.96225	11.4127	8.72082	8.82178	13.4548	12.261	12.2655	7.46519	6.7544	7.46372	8.35153	8.89337	9.15517	9.21798	8.86485	13.2405
LE01Gene04541	GH12	Endo-beta-1,4-glucanase	Cellulase	6811	6.79166	6.43075	7.09347	12.0799	8.44372	7.97997	13.5451	12.0462	11.3704	7.22422	5.67551	6.93134	7.76878	8.00622	8.12337	7.89712	8.07467	13.1098
LE01Gene12231	GH12	Endo-beta-1,4-glucanase	Cellulase	1950	8.28293	8.26483	7.89767	10.4883	9.35383	8.68156	10.7493	9.48716	10.3543	8.46903	8.34333	8.20236	8.62208	8.70909	9.46872	9.06653	8.69573	10.7313
LE01Gene12233	GH12	Endo-beta-1,4-glucanase	Cellulase	1956	6.79166	7.2054	7.08383	9.59435	8.21362	6.64478	10.2357	8.37854	8.09368	7.58673	7.61925	7.67073	7.15274	7.82133	7.5059	6.89032	8.22211	10.671
LE01Gene13789	GH12	Endo-beta-1,4-glucanase	Cellulase	5803	4.10419	3.26643	3.19985	9.84836	7.84919	10.2428	9.94738	7.96344	12.0142	4.54393	5.19592	3.81904	11.7184	10.4546	9.55446	12.4888	11.0089	11.2469
LE01Gene13893	GH125	alpha-mannosidase	.	5953	10.1171	9.19097	10.6086	10.2336	9.16502	10.5363	9.66213	7.28523	10.8196	8.12723	8.71156	8.43881	9.16877	8.8963	8.45598	10.7002	9.11456	8.99631
LE01Gene11322	GH127	alpha-L-arabinofuranosidase ?	.	.	10.3587	10.6098	10.5729	11.3415	11.0859	11.2591	11.6102	11.039	11.428	10.1309	10.1265	10.9566	11.2452	11.2984	11.4163	11.4636	11.0922	11.1334
LE01Gene05822	GH127	.	.	.	9.1102	8.84522	9.29017	12.7305	11.1478	10.9	14.5962	12.6823	13.2185	7.98523	8.18036	8.81021	11.4164	10.1295	10.355	9.82844	10.1424	15.1465
LE01Gene13878	GH128	Glycosyl hydrolase catalytic core	.	5921	16.2093	16.2231	15.6486	14.529	14.8255	14.4825	14.2414	14.7371	14.2767	16.5979	16.4656	16.2726	14.0995	14.1237	14.2081	14.0886	14.3905	14.3386
LE01Gene03896	GH128	Glycosyl hydrolase catalytic core	.	4831	8.89254	9.09566	8.84698	8.7339	9.1294	8.94401	8.2085	8.88639	9.04263	9.93305	11.7426	10.754	11.4438	13.337	11.8383	10.7701	13.4712	11.7879
LE01Gene01001	GH128	Glycosyl hydrolase catalytic core	.	11217	11.3846	12.2314	11.8288	11.5242	14.7878	11.7441	11.8116	16.1359	11.5521	11.3371	11.5873	11.5508	15.25	16.1487	18.0965	14.4819	15.911	14.4426
LE01Gene02985	GH128	Glycosyl hydrolase catalytic core	.	22502	8.7247	9.90405	9.50593	10.6135	12.1454	10.5899	10.5074	11.914	10.2529	8.3453	9.40607	8.18246	10.3951	10.7107	9.57218	8.99642	10.485	9.19525
LE01Gene09549	GH128	Glycosyl hydrolase catalytic core	.	18741	9.5116	9.5176	9.19931	9.68045	11.031	10.0605	10.7309	12.8254	10.2529	9.4187	9.17787	9.80373	9.91269	10.5035	10.4667	11.2429	12.2542	13.4368
LE01Gene13578	GH13_1	Alpha amylase	amylase	5252	12.9708	13.3079	12.7221	11.8334	12.0754	11.7847	11.7944	12.1682	11.9976	13.1236	12.9985	12.976	10.9105	11.2046	10.9551	10.7832	11.322	11.7066
LE01Gene08938	GH13_1	Alpha amylase	amylase	17367	12.1173	11.8067	12.3224	12.3851	12.4538	12.4942	12.8717	12.6516	13.3014	11.7254	12.2682	12.2144	12.8204	13.177	12.5912	13.2921	12.977	12.5655
LE01Gene12213	GH13_1	Alpha amylase	amylase	1919	13.4589	13.5576	12.8353	10.9232	10.9551	10.6484	10.6922	10.5254	10.287	13.9344	13.9122	13.9523	12.0166	11.3807	11.464	11.2567	10.7952	11.4644
LE01Gene14315	GH13_1	Alpha amylase	amylase	7377	9.76239	9.73431	9.77524	10.4674	10.365	10.4988	10.4309	10.3537	10.0808	9.53653	9.56318	9.79229	10.0438	10.0409	10.501	10.1157	10.085	10.148
LE01Gene12203	GH13_1,GH152	Alpha amylase	amylase	1901	5.13735	4.64107	5.6991	6.90509	5.94636	8.33094	6.52339	5.83713	8.79848	3.28342	5.23336	5.18216	9.32427	8.52074	7.24608	7.92254	7.85795	8.06752
LE01Gene03470	GH13_22,GT5	Alpha amylase	amylase	2472	14.0651	13.9669	13.6991	12.8317	13.1291	12.8799	12.8682	13.2791	13.0499	14.5693	14.5469	14.36	13.1797	13.2341	13.1815	13.3855	13.3319	12.9052
LE01Gene04657	GH13_22,GT5	Alpha amylase	amylase	7229	12.0749	11.5353	12.75	13.476	13.6016	13.6013	13.5861	13.8733	13.5696	11.7613	12.0204	12.107	13.3559	13.6458	12.9769	13.6698	13.8875	13.2433
LE01Gene00776	GH13_22,GT5	Alpha amylase	amylase	8323	12.3705	11.9853	12.4367	12.0301	11.928	12.1653	11.9516	11.9975	12.1853	12.6252	12.6243	12.5931	12.3766	12.0376	11.8468	12.5475	12.368	11.7806
LE01Gene09188	GH13_32-CBM20	Alpha amylase	amylase	17759	8.55213	8.55307	8.83553	12.9084	11.9496	11.9249	13.6645	11.6797	12.9008	9.23567	8.60133	9.1263	10.3606	10.489	10.3425	10.1751	10.4027	10.6372
LE01Gene04133	GH13_5	Alpha amylase	amylase	5554	7.96216	7.53844	7.88662	8.38276	7.79566	8.18747	7.56258	7.39629	8.22421	10.3981	10.1718	9.96822	10.5023	11.0858	10.8411	10.6639	10.3442	10.3339
LE01Gene01055	GH13_5	Alpha amylase	amylase	11298	10.3257	10.3476	10.2583	9.15072	9.25371	9.27426	8.78193	9.23162	8.8765	10.5599	10.6357	10.3289	8.74987	8.57659	9.15778	9.13611	9.01321	8.83304
LE01Gene07209	GH13_8-CBM48	Alpha amylase	.	13372	11.2262	10.8608	11.3626	11.341	11.3288	11.4212	11.6796	11.5954	11.4286	11.5261	12.2775	11.8264	12.5808	13.4672	12.2818	12.4146	13.3195	13.1774
LE01Gene13916	GH131	.	.	5987	4.31455	3.40336	3.46053	9.20225	5.32907	4.45653	10.5869	8.40091	7.99537	2.28775	0	0	1.92873	0	2.8475	0	0	8.71861
LE01Gene03370	GH131-CBM1	Probable 1,5-beta-D-glucan cellobiohydrolase	Cellulase	2283	6.76803	7.04718	5.56689	12.7611	8.99335	6.50046	14.8877	13.3142	12.5624	6.22451	5.96977	6.01238	5.71329	5.78452	6.52194	6.50901	6.78906	13.4182
LE01Gene05224	GH133,GH13_25	Amylo-alpha-1,6-glucosidase, Glycogen debranching enzyme	amylase	9295	11.8612	11.7212	11.7815	11.8605	11.8608	11.9288	11.4648	11.6181	11.4462	12.7787	13.5335	13.2286	12.8573	13.1917	12.3479	12.2986	12.964	12.8391
LE01Gene13979	GH15	Glycosyl hydrolases family 15	amylase	6358	9.35981	9.18148	9.66638	10.2361	10.1708	10.3093	10.4622	10.0182	10.5346	8.44109	8.38135	8.8549	9.78232	10.0396	9.75575	9.81831	10.1587	9.70664
LE01Gene13980	GH15	Glycosyl hydrolases family 15	amylase	6360	9.37358	9.04945	9.87227	9.57101	9.73024	9.76124	10.113	9.81161	9.93753	8.72874	8.91246	8.99269	9.32427	9.9338	9.11273	9.69092	9.9236	8.80126
LE01Gene04370	GH15	Glucoamylase	amylase	6279	0	0	0	8.75476	7.27607	8.11001	6.8761	5.93848	8.24039	0	0	0	0	0	2.624	0	4.1851	0
LE01Gene05009	GH152	Thaumatin family	.	8813	7.84282	7.99913	8.3029	8.60198	8.96669	8.90154	9.10161	8.48289	8.95707	6.80302	7.94677	8.01253	8.38826	9.4861	9.1341	8.68711	12.4791	9.41485
LE01Gene02946	GH152	Thaumatin family	.	22421	8.62957	8.33499	9.00861	12.2067	11.2558	10.7501	10.3975	9.72914	10.5003	7.6227	7.84161	8.30256	10.1427	11.1138	11.751	10.2	11.5171	11.335
LE01Gene10845	GH152	Thaumatin family	.	21576	10.4235	10.3455	9.51314	8.987	8.06567	8.12977	8.14808	6.62606	8.04536	8.80587	8.07604	6.83265	7.612	7.56572	6.60082	7.243	7.24237	6.48262
LE01Gene11296	GH154	Uncharacterized protein conserved in bacteria (DUF2264)	.	22663	9.82385	9.32416	9.83395	11.0538	10.7142	10.8338	11.3905	10.9963	11.0506	9.59383	9.74428	10.2569	10.9493	10.7678	11.2988	11.4946	10.9028	11.7135
LE01Gene04190	GH15-CBM20	Glucoamylase	amylase	5641	10.7977	10.2489	10.2848	14.9902	13.7278	13.9916	12.7744	11.4976	13.9848	8.54972	8.56875	8.00122	8.64586	9.15051	9.607	9.09197	9.73821	9.61456
LE01Gene04191	GH15-CBM20	Glucoamylase	amylase	5642	12.1281	12.0681	11.7299	10.7075	11.1507	11.0358	11.0184	11.2311	11.1645	11.6476	11.4045	11.5488	11.1797	10.9571	10.4855	10.8918	10.6043	10.6291
LE01Gene12151	GH15-CBM20	Glucoamylase	amylase	1814	8.54867	8.04695	8.47509	8.07524	8.3395	8.66473	8.32224	7.72185	8.7653	8.83989	9.01813	8.75064	9.35758	9.92235	9.37308	9.16835	9.78113	9.1148
LE01Gene04186	GH15-CBM20	Glucoamylase	amylase	5634	8.21901	8.50061	8.42632	12.7814	11.1951	11.8487	14.7418	12.5254	14.4936	8.09686	8.76367	8.11582	9.24639	9.58925	9.75748	9.68722	9.7776	12.8222
LE01Gene09786	GH16_1	Glycosyl hydrolases family 16	.	19150	13.9622	13.988	14.0722	14.9231	14.759	14.8687	14.9089	14.4323	14.9432	13.3615	13.0852	13.0984	13.7457	13.4615	13.1954	13.6903	13.5892	13.9353
LE01Gene03207	GH16_1	Glycosyl hydrolases family 16	.	1213	12.2731	12.3715	12.4147	11.7159	11.8608	11.7206	11.5045	11.9871	11.754	12.6122	12.8121	12.6289	12.2702	12.8863	12.4425	11.8671	12.5851	12.4201
LE01Gene09781	GH16_1	Glycosyl hydrolases family 16	.	19136	12.3289	12.797	12.4305	12.4255	13.4331	12.5647	12.2914	13.1056	12.784	13.1491	13.3842	13.3301	13.7381	14.2853	14.0961	13.9144	14.8863	13.9931
LE01Gene07068	GH16	.	.	13144	9.808	9.63002	9.64194	11.1928	12.0973	11.4357	11.67	13.2483	11.6176	9.51945	9.85801	10.2208	11.866	11.8441	13.7193	11.9217	11.3353	11.9496
LE01Gene14328	GH16	.	.	7398	10.4169	10.4291	10.1733	9.73221	10.0891	9.77698	9.45828	10.3468	9.78035	10.453	10.7369	10.7725	10.3921	10.8614	10.7067	9.81831	10.7328	10.3873
LE01Gene05083	GH16	Glycosyl hydrolases family 16	.	8993	8.71237	8.82098	9.67924	12.7342	12.3098	11.8964	11.5859	12.4391	11.59	7.0555	7.49375	7.41339	11.2711	10.4316	13.2257	10.5089	10.659	10.1593
LE01Gene05084	GH16	Glycosyl hydrolases family 16	.	8994	4.60866	6.00523	5.79678	9.664	9.17437	9.23602	7.65231	7.45734	9.59975	4.76606	5.75489	4.25985	9.26626	7.32609	6.23592	8.089	6.73188	8.2899
LE01Gene02200	GH16_2	Beta-glucan synthesis-associated protein SKN1/KRE6/Sbg1	.	18038	12.1339	11.5446	11.9023	12.1247	12.6649	12.3795	12.4605	12.6527	12.5096	11.2942	11.7588	11.5662	12.0694	12.1556	12.2282	12.1665	12.181	12.4256
LE01Gene09459	GH16	Glycosyl hydrolases family 16	.	18601	7.11567	6.75894	6.55159	8.78211	8.39255	8.64083	9.07265	9.17563	8.59113	5.71285	4.53379	6.24123	6.91616	7.02794	7.20627	5.96496	8.02793	7.2099
LE01Gene06326	GH16	Glycosyl hydrolases family 16	.	11874	7.06809	7.32228	7.08383	8.23718	8.15813	8.2565	8.89654	8.6787	8.72752	6.63001	6.86588	6.59741	7.30563	7.8817	7.9474	8.40537	8.9042	8.9332
LE01Gene04800	GH16	Glycosyl hydrolases family 16	.	7600	10.9623	10.7703	10.8468	10.7137	13.2134	11.6599	12.3606	14.791	12.569	10.7516	10.7531	10.7557	11.6007	11.7102	12.5791	12.5444	12.8721	13.5608
LE01Gene02697	GH16	Glycosyl hydrolases family 16	.	21031	11.745	11.6981	11.8982	12.3521	12.9099	12.6904	13.2023	13.8555	13.121	11.5626	11.4464	11.2202	12.3207	12.4396	12.6075	12.9309	13.2853	13.8953
LE01Gene11628	GH16	Glycosyl hydrolases family 16	.	23214	8.04315	8.0099	8.22169	9.29774	9.17437	9.4198	9.65997	8.90215	9.70459	11.5829	11.5254	11.1263	9.13555	10.0475	9.12078	8.87141	9.34177	8.58688
LE01Gene04312	GH16	Glycosyl hydrolases family 16	.	6174	12.8895	12.463	12.9397	12.2618	13.1423	12.6608	12.7027	13.5161	12.8545	13.1631	13.6949	13.4298	13.4453	13.8988	13.4401	13.0672	13.5158	12.8138
LE01Gene08829	GH16_1	Glycosyl hydrolases family 16	.	17182	11.7328	11.7387	11.4183	11.213	11.1667	11.1671	11.2695	11.2323	11.1149	12.2429	12.292	12.0238	11.0773	11.2761	11.3954	11.0702	11.5433	11.2563
LE01Gene07047	GH16_1	Glycosyl hydrolases family 16	.	13111	9.73827	9.82244	9.84826	10.6259	10.4172	10.8383	10.8226	10.6852	10.8524	9.68852	9.8384	10.348	10.7784	11.1024	11.1322	10.831	10.934	10.9878
LE01Gene01843	GH16_1	.	.	16200	9.01804	8.82403	9.06116	9.80402	9.20891	9.14672	9.3711	8.77433	10.0335	8.15206	8.05005	8.29331	8.03894	8.45868	8.58963	9.25097	8.67691	8.30358
LE01Gene01897	GH16_1	.	.	16295	14.3467	14.3535	14.1458	13.4774	13.5088	13.4009	13.3556	13.2485	13.6725	14.2688	14.2215	14.0977	13.0143	13.4439	13.2263	13.7113	14.0304	13.4332
LE01Gene00074	GH16_1	Glycosyl hydrolases family 16	.	143	11.4589	11.4933	11.5546	11.1664	11.4018	11.4382	11.3688	11.4038	11.4227	11.1617	10.9903	11.3083	11.4001	11.4122	11.2833	11.4291	11.3673	11.5794
LE01Gene11400	GH16_1	.	.	22841	8.25346	8.89543	9.05377	11.1527	10.4985	11.0027	11.8271	10.3742	11.3425	8.41671	8.77005	8.31632	9.81266	10.3917	8.83126	9.47159	10.5526	10.8756
LE01Gene08682	GH16_1	.	.	16946	8.66198	8.37301	7.99349	9.75136	8.81052	8.45361	9.46324	8.11727	9.63487	7.55729	6.60531	7.06777	7.77495	7.15077	7.45585	8.07206	7.69547	7.79161
LE01Gene06653	GH16	.	.	12473	11.881	11.9986	11.7904	11.4094	11.5996	11.4685	11.4704	11.6066	11.4732	11.489	11.7795	10.9927	10.5705	10.969	10.0197	10.3256	10.7015	10.9088
LE01Gene11778	GH16_10	.	.	23470	8.27457	7.52349	7.84726	11.9355	10.427	10.0253	10.9466	9.27828	11.9004	6.79043	7.25979	8.19245	8.6988	8.40622	9.31344	9.11696	8.28309	10.1668
LE01Gene11928	GH16	Glycosyl hydrolases family 16	.	1482	2.20151	4.79836	3.04942	0	0	2.52674	0	0	0	0	2.54057	3.18111	2.50555	0	0	2.65504	2.67174	0
LE01Gene00492	GH16_2	Beta-glucan synthesis-associated protein SKN1/KRE6/Sbg1	.	904	11.3567	11.009	11.7025	12.6197	12.8304	13.0295	13.2004	13.2356	13.516	10.3037	10.5031	10.4934	12.1765	12.7313	12.3907	13.3733	12.9512	13.2586
LE01Gene09705	GH16_2	Beta-glucan synthesis-associated protein SKN1/KRE6/Sbg1	.	19007	13.5334	13.4607	13.0552	12.474	12.4318	12.5011	12.49	12.4651	12.4189	13.5715	13.915	13.9355	13.4858	13.5904	13.5213	13.1272	13.236	13.2771
LE01Gene03836	GH16_2	Beta-glucan synthesis-associated protein SKN1/KRE6/Sbg1	.	4278	14.2527	14.2056	13.9252	13.544	13.6952	13.5763	13.6283	13.6724	13.8816	14.2808	14.2759	14.3581	13.9177	14.119	13.7273	13.9608	13.9748	13.8145
LE01Gene04938	GH16_2	Beta-glucan synthesis-associated protein SKN1/KRE6/Sbg1	.	8695	8.89254	8.74247	9.11423	10.1729	10.4599	10.2291	11.2466	10.8697	10.9134	9.04204	9.32385	9.24378	11.029	11.0632	11.3882	11.1157	10.8783	10.6264
LE01Gene09594	GH16	Beta-glucan synthesis-associated protein SKN1/KRE6/Sbg1	.	18802	11.5775	11.3806	11.0462	11.1729	11.1026	11.0688	11.0444	11.0777	11.046	12.4743	12.3851	12.0224	11.697	12.0784	11.3652	11.3059	11.7545	11.5332
LE01Gene11302	GH16-CBM18	.	.	22671	12.2872	12.4829	11.8704	11.4409	10.6859	11.02	10.7614	10.2759	10.9293	12.7026	12.8204	12.891	10.6347	10.6914	10.5545	9.81492	10.6093	10.4623
LE01Gene06060	GH17	.	.	10837	4.89709	5.02752	5.79678	6.96599	6.44068	7.05965	7.46689	7.26586	7.24516	4.48261	6.15675	6.22186	6.53452	7.31738	6.92898	7.13837	7.69547	6.59067
LE01Gene01277	GH17	.	.	11699	8.6197	8.26033	7.49378	10.0573	9.57649	9.79411	10.7122	9.70956	9.96051	11.1525	9.53909	9.45135	10.4807	10.7646	9.57609	10.6238	10.5536	10.6754
LE01Gene05973	GH17	.	.	.	8.26616	8.00452	9.42231	10.8724	9.7923	10.5854	10.5277	9.23411	11.1474	7.54984	7.26883	8.084	9.78079	9.46652	8.97441	10.1511	9.63477	9.9405
LE01Gene09613	GH17	.	.	18833	12.9655	13.2829	12.8417	12.3821	12.6844	12.4149	12.5403	12.6085	12.4482	13.0733	12.8817	12.9644	12.1542	12.2563	12.4288	12.113	12.2697	12.3784
LE01Gene06071	GH17	.	.	10848	12.11	11.7604	11.9591	11.2218	11.4201	11.353	11.49	11.6337	11.4612	12.2278	12.2839	12.4449	11.6608	11.6901	11.7793	11.8431	11.7675	11.5539
LE01Gene12146	GH17	.	.	1807	13.6047	13.7801	13.4528	13.5264	13.504	13.4282	13.6941	13.4717	13.9797	13.7578	13.6716	13.7295	13.5823	13.561	13.5331	13.8149	13.6368	13.7417
LE01Gene04647	GH18	.	.	7213	9.38333	10.8822	9.81075	8.44398	9.2756	9.5224	8.74569	8.3187	8.70048	8.88798	9.50122	9.11847	12.1506	12.4434	11.3408	11.5497	13.9557	9.5162
LE01Gene05029	GH18	.	.	8841	10.4516	10.5566	10.3202	9.82389	9.90332	9.76913	9.71515	9.69696	9.85933	10.4217	11.4243	10.5966	9.69381	10.9373	10.0829	9.49932	10.7838	10.648
LE01Gene09723	GH18	Chitinase	.	19030	7.47071	8.00452	7.75912	11.9121	9.43971	9.37704	13.2496	11.0687	12.0356	7.73214	7.54676	7.81342	7.91578	7.71917	7.09077	8.02	8.10314	9.53371
LE01Gene04624	GH18	.	.	7179	9.22962	10.2647	9.15625	7.314	8.76172	7.77565	6.46515	9.47245	7.27689	9.28365	9.46431	9.00124	10.0167	10.5516	12.1802	9.98146	11.3591	8.29448
LE01Gene04080	GH18	.	.	5476	10.7183	10.7837	11.5117	11.1858	10.8021	11.5592	10.736	10.5911	11.068	10.5524	10.7604	10.4771	11.2329	11.6338	10.9826	10.1184	11.5235	11.1774
LE01Gene02188	GH18	.	.	18014	11.5982	11.5199	11.7863	11.8961	11.939	11.9536	12.1758	11.7719	11.9825	12.3484	12.6444	12.6859	12.5918	13.133	12.7799	12.4811	13.0173	12.4623
LE01Gene07656	GH18	Bestrophin, RFP-TM, chloride channel_Chitinase A1	.	14755	9.28478	9.16953	9.44132	10.4258	10.2054	10.5298	10.5617	9.64917	11.2563	9.2814	9.85351	9.4822	11.2863	11.7609	10.3573	11.4401	10.7509	10.7126
LE01Gene11646	GH18	Lactose permease	.	23246	10.916	10.2306	10.9272	12.8567	12.355	12.5569	13.5404	12.7864	13.0008	9.97261	10.7369	10.944	12.4549	12.4421	12.6577	12.8991	12.6658	13.8978
LE01Gene09736	GH18	Glycosyl hydrolases family 18	.	19051	9.14501	8.7457	9.93395	11.5237	12.1687	11.905	12.463	11.8167	12.3716	9.69867	8.3938	9.31177	13.6693	12.5075	11.6697	11.9898	11.7856	12.7806
LE01Gene05686	GH18	PX domain_Chitinase A1	.	10186	9.56056	9.31767	10.7616	10.1599	9.98797	9.56294	10.8207	8.93931	9.96701	11.007	10.0964	10.4177	13.3696	12.2685	11.6387	12.3528	11.7944	10.955
LE01Gene10125	GH18	Chitinase	.	20071	8.0627	6.52382	7.38804	11.0754	9.90894	9.84132	11.8989	10.3433	10.5617	5.16778	5.15749	6.35228	8.96505	7.00641	7.03505	6.34943	5.7162	9.72539
LE01Gene01502	GH18	Glycosyl hydrolases family 18	.	14023	4.02665	0	3.46053	2.62467	3.36918	4.57658	3.95961	0.1	3.32157	2.54935	3.85708	3.33326	4.60841	3.76168	3.95055	3.53572	0.1	3.31353
LE01Gene08044	GH18-CBM5	Chitinase	.	15403	9.11956	8.70653	9.22805	11.0454	10.1329	10.5997	11.0908	9.401	10.8178	8.62615	7.79229	8.5243	11.3631	9.90936	9.08556	9.55729	9.33458	11.4289
LE01Gene10302	GH18-CBM5	Chitinase 2	.	20374	7.76737	7.52349	8.51869	11.6914	11.4651	11.1154	12.7593	11.1653	11.6004	8.0126	7.46256	8.63826	12.6272	10.0865	10.1328	10.2116	8.85818	10.7916
LE01Gene12913	GH2	Beta-mannosidase	Hemicellulase	3711	11.6484	11.4271	12.3733	12.6652	12.6181	12.6854	12.3685	11.5969	13.0741	11.6149	11.962	12.3605	13.1463	12.8644	12.7107	13.5728	12.6283	12.9354
LE01Gene01683	GH2	Beta-mannosidase	.	14346	11.3043	11.2658	11.4355	13.0674	12.6341	12.9725	13.8421	12.8631	13.4584	10.8058	10.9634	11.0712	11.8471	11.6316	11.6303	12.2347	12.1314	13.1345
LE01Gene01448	GH2	Beta-mannosidase	.	13924	8.53473	8.22842	8.98549	10.5232	10.0155	10.2188	10.605	10.4044	10.5988	8.17647	8.23676	7.39621	10.1076	9.76779	9.78476	10.1856	9.86496	10.0019
LE01Gene02206	GH2	Beta-galactosidase	.	18046	11.3773	11.0217	11.2774	12.1323	11.951	12.2022	12.3925	12.1141	12.318	11.4555	11.6956	11.6125	12.2351	12.5182	12.2485	12.339	12.3458	12.2586
LE01Gene10240	GH20	Glycosyl hydrolase family 20, catalytic domain beta-acetyl hexosaminidase like	.	20266	9.4198	8.77123	10.3646	12.5146	11.9459	12.7685	13.1627	11.4539	13.4607	8.6119	8.66779	9.05968	12.5588	12.4957	11.7266	13.3878	12.7617	13.1191
LE01Gene02645	GH20	Glycosyl hydrolase family 20, catalytic domain	.	20953	9.46091	9.0676	9.40111	10.3189	10.2403	10.5149	10.6558	10.1796	10.7915	9.42074	9.61729	9.84229	10.7442	10.4685	10.6438	11.0624	10.3395	11.0123
LE01Gene07085	GH20	Glycosyl hydrolase family 20, catalytic domain beta-acetyl hexosaminidase like	.	13165	12.1588	11.7383	11.9927	11.2299	11.3067	11.3842	11.556	11.5325	11.8232	11.852	11.948	11.9366	11.9588	12.0833	12.2952	12.8247	12.3323	12.316
LE01Gene01933	GH23	Transglycosylase SLT domain	.	16358	12.5819	13.455	11.9696	11.1922	10.742	11.086	11.2013	10.2807	11.3568	14.0783	13.988	14.2095	11.8084	12.0707	11.2173	11.0509	11.6509	11.7928
LE01Gene05794	GH25	Glycosyl hydrolases family 25	.	10366	10.1766	10.6054	11.4155	11.8468	11.7166	12.0269	11.0804	9.43174	12.0134	8.58297	8.91534	9.67256	11.054	10.4092	9.07454	10.2759	9.88313	11.2615
LE01Gene13721	GH26	Glycosyl hydrolase family 26	.	5707	9.51692	10.8155	10.7085	7.40478	7.96688	7.63755	7.67818	6.53189	7.27689	10.61	11.0746	10.876	9.44152	9.11323	8.30867	8.23316	9.18549	8.51817
LE01Gene05323	GH27	alpha-galactosidase	Hemicellulase	9460	12.2838	12.2922	12.8718	15.0807	13.9304	14.4641	16.0645	14.3132	15.8088	12.2318	11.7019	12.2843	12.2976	12.1693	11.0565	14.2411	13.1409	14.5178
LE01Gene09625	GH27	alpha-galactosidase	Hemicellulase	18855	11.4922	10.8117	11.0517	12.8975	11.6653	12.042	12.9483	11.6247	12.7975	8.64025	9.04732	9.38107	10.3461	10.3149	10.6466	10.9686	10.45	12.73
LE01Gene01844	GH27	.	.	.	11.2914	11.0816	11.9888	12.4182	12.5366	12.9514	12.3562	11.9756	13.5508	11.5529	11.6779	11.7494	13.354	13.9466	14.6108	13.9611	14.0756	13.9522
LE01Gene12953	GH27	alpha-galactosidase	.	3781	7.66873	7.43839	6.90918	8.75476	7.4934	8.59536	8.02582	8.01076	8.32378	9.67831	9.10148	9.3745	8.3096	9.39997	8.55439	8.9005	9.50852	8.82358
LE01Gene01882	GH27-CBM1	alpha-galactosidase	Hemicellulase	16265	10.415	10.3561	10.1058	11.7944	9.8835	9.185	12.9653	10.8912	11.5363	10.6314	10.5493	10.5566	9.41803	9.44067	9.1913	9.46512	9.30548	12.3154
LE01Gene06823	GH27-CBM35	alpha-galactosidase	Hemicellulase	12757	10.2154	10.0363	10.3119	12.3222	11.0168	11.8349	12.0257	10.5059	12.6023	8.87312	9.31078	9.45758	10.216	10.0955	10.347	11.7811	10.4288	11.3787
LE01Gene06016	GH28	polygalacturonase	Pectinase	10771	10.9032	9.79625	10.0047	14.4816	12.4104	10.5177	13.3022	10.5959	10.936	6.64408	7.77335	8.96966	9.36987	7.13101	7.82788	8.18143	7.29267	12.7694
LE01Gene06014	GH28	polygalacturonase	Pectinase	10769	7.69403	8.02058	7.70981	8.05296	8.04033	7.99621	7.66961	7.81142	8.14043	8.73861	8.0965	8.29794	8.81726	8.83044	9.05786	8.55107	8.72166	9.04867
LE01Gene06973	GH28	polygalacturonase	Pectinase	13007	7.73726	8.39781	7.79502	11.5151	9.4123	11.7485	10.7339	8.63029	13.8201	7.57209	8.36879	8.48828	11.6566	11.1412	10.3332	15.3599	12.5908	14.6137
LE01Gene03020	GH28	polygalacturonase	Pectinase	22573	9.24682	9.09566	9.52387	11.4204	10.0051	10.7809	11.156	9.77268	11.3431	8.1813	10.1077	9.97546	11.3945	10.6347	11.0318	13.5019	11.445	13.4843
LE01Gene08349	GH28	polygalacturonase	Pectinase	15880	6.29263	6.88123	6.15093	6.91748	7.12991	6.71186	7.24256	6.95114	6.86843	7.95168	9.063	8.78074	8.72775	7.1799	7.67585	8.51809	6.65705	11.2416
LE01Gene02734	GH28	rhamnogalacturonase	Pectinase	21103	8.03327	7.76503	7.51546	10.7012	8.83136	8.30511	11.4918	10.044	9.63487	7.94032	8.59055	8.30716	8.86437	8.7355	8.97144	9.43008	8.66168	10.8156
LE01Gene06700	GH28	.	.	12547	8.27037	8.15273	8.63881	9.23973	8.80149	8.94401	9.79809	8.97255	9.71428	7.79024	7.9524	8.36127	9.09169	8.29963	9.19639	8.44539	8.57085	9.20257
LE01Gene12986	GH28	alpha-L-rhamnosidase	.	3839	9.82814	8.90122	10.6647	11.675	11.4522	11.5496	11.3135	10.9546	12.0483	8.25191	9.3666	8.63093	11.4125	12.5171	11.7751	12.9498	13.0106	13.495
LE01Gene04452	GH28	.	.	6645	4.31455	4.98451	5.62123	6.21679	6.64284	5.4233	6.52339	4.30178	5.65782	4.48261	4.59259	3.47087	7.04442	3.86098	5.3675	6.27241	3.55385	6.94494
LE01Gene08820	GH28	endo-xylogalacturonan hydrolase	.	17164	8.36398	7.97186	7.98833	12.4366	9.8663	8.47307	12.5225	10.249	9.95725	7.83386	7.2137	8.19245	8.84101	5.41132	8.33198	9.18158	7.00959	11.0702
LE01Gene02894	GH28	galacturan 1,5-alpha-galacturonidase	.	22344	7.65591	7.50078	8.34792	9.50688	7.53755	7.99081	9.17005	6.7705	9.44306	6.73891	8.04479	8.41342	9.81266	8.99797	9.09376	11.4657	9.34415	11.3787
LE01Gene01562	GH28	.	.	14129	9.8381	9.23751	8.80651	10.6557	9.41822	8.17326	7.9987	7.66383	7.19066	7.89397	8.09141	8.26047	6.93834	6.7194	7.35932	7.6607	6.56182	8.02412
LE01Gene05940	GH28	exopolygalacturonase	.	10646	7.06809	7.61093	7.77718	9.09182	8.58365	8.4259	9.02641	8.62269	8.99572	7.29727	8.39793	8.41768	9.37598	9.09805	9.16299	10.1143	9.03701	10.9398
LE01Gene13684	GH28	alpha-L-rhamnosidase	.	5384	8.42946	8.17203	8.9829	10.2739	9.44937	10.045	10.5801	9.35361	10.2219	7.95732	8.02358	8.24136	10.11	10.0369	9.64472	11.6516	10.4243	11.4305
LE01Gene04353	GH29	Alpha-fucosidase	.	6247	10.8231	10.8496	11.1555	12.0443	11.3691	11.5952	12.0792	11.4077	12.1414	10.4063	10.704	10.7683	11.6925	11.4321	11.3943	13.0269	11.8729	12.5027
LE01Gene02578	GH3	beta-glucosidase	Cellulase	20839	9.40264	9.67468	9.58497	9.75136	10.2766	9.94812	10.7523	11.1725	10.1438	9.238	9.25499	9.57481	9.35139	9.44468	9.19639	9.31238	9.37716	10.3316
LE01Gene02612	GH3-CBM1	beta-glucosidase	Cellulase	20901	9.7549	9.76641	10.1699	10.6511	10.6052	10.6798	10.6891	10.9356	10.7047	9.04204	9.59409	10.1211	10.7035	10.5168	10.102	10.2697	10.1776	10.0992
LE01Gene06170	GH3	beta-glucosidase	Cellulase	11023	9.34592	9.09818	9.0734	10.8148	10.1484	10.3656	11.0844	10.5645	11.3543	8.95159	9.01813	9.08133	10.4463	10.7057	10.2116	11.5146	10.8314	11.9214
LE01Gene07491	GH3	beta-glucosidase	Cellulase	14491	10.6161	10.1082	10.083	10.0932	9.31419	8.87544	11.1946	10.177	10.1806	10.2181	11.4309	11.2438	9.72286	9.74685	9.57609	9.72384	9.45873	12.3024
LE01Gene07574	GH3-CBM1	beta-glucosidase	Cellulase	14621	13.1639	12.8321	13.0177	11.963	13.0186	12.208	11.904	13.5896	12.3161	13.7481	14.2234	14.3484	13.4932	13.7778	14.5087	13.4747	13.4156	13.0631
LE01Gene10512	GH3-CBM1	beta-glucosidase	Cellulase	20658	11.6516	11.3481	10.8631	10.7505	10.3558	10.3179	11.567	10.5059	11.2916	11.9301	12.5613	12.0817	13.0335	12.4763	11.4065	12.9902	12.6672	11.818
LE01Gene11660	GH3	beta-glucosidase	Cellulase	23264	9.84659	8.98544	9.37169	11.4664	10.1801	10.7477	11.8433	10.0581	11.8317	9.00163	9.99782	10.2652	10.4588	8.57293	9.99358	12.1168	9.46093	11.8983
LE01Gene05156	GH3	beta-xylosidase	Hemicellulase	9102	8.76405	9.13306	9.80783	11.3259	10.1002	10.7284	11.2652	9.99484	12.1793	8.53092	8.9579	8.79719	9.38004	9.4306	9.84595	13.2102	11.2218	13.4055
LE01Gene06168	GH3	beta-xylosidase	Hemicellulase	11017	9.57425	9.15505	9.66638	11.0447	10.7278	11.0087	10.8739	10.6294	11.0181	8.77423	9.10148	9.72337	10.7645	10.1952	10.7085	10.7893	10.0415	10.6693
LE01Gene07163	GH3	Glycosyl hydrolase family 3 N terminal domain	.	13297	10.9347	10.3498	11.3288	11.5318	11.1806	11.4031	12.0625	11.0589	12.0103	10.2004	10.0913	9.91795	11.4055	10.9759	10.1315	11.181	10.8271	11.033
LE01Gene02386	GH3	C-terminal Fibronectin type III-like domain	.	19474	12.6873	12.4061	12.7568	13.5679	13.1993	13.4994	13.4723	13.1413	13.2127	12.3634	12.4034	12.5379	13.5451	12.8672	13.0295	13.0679	12.5555	13.509
LE01Gene13816	GH30	O-Glycosyl hydrolase family 30	.	5847	10.9817	10.8346	10.4488	12.8496	11.5804	11.5751	11.7468	11.2084	11.7869	10.5261	10.6711	10.8682	11.1885	10.8227	11.8661	11.8568	11.154	12.6739
LE01Gene04345	GH30_3	Glycosyl hydrolase family 30 TIM-barrel domain	.	6234	13.3046	13.1788	12.6391	12.2014	12.1655	12.0761	11.2552	11.8773	11.5478	13.2761	13.4182	13.4724	12.7365	12.2707	13.1118	11.8514	11.9915	11.7634
LE01Gene13234	GH30_3	Glycosyl hydrolase family 30 TIM-barrel domain	.	4420	9.79783	9.78376	9.76472	10.394	10.3589	10.4056	10.5002	10.6007	10.5248	9.48078	9.40197	9.74049	10.2452	10.3313	10.4009	9.97083	10.1369	10.1817
LE01Gene06426	GH30_3	Glycosyl hydrolase family 30 TIM-barrel domain	.	12064	10.3166	10.452	10.4877	12.2856	12.2336	11.9899	13.1476	12.0624	12.6132	10.0513	10.5994	10.4038	13.4923	12.9493	12.5866	12.688	12.6061	12.4072
LE01Gene03011	GH31	Glycosyl hydrolases family 31	.	22551	11.8602	11.5307	12.3725	12.2975	11.5939	12.1707	11.3024	10.464	12.3544	11.3031	11.6357	11.7695	12.725	12.0155	11.527	13.005	11.9088	11.6556
LE01Gene09429	GH31	Alpha-glucosidase	.	18557	12.5446	12.4336	12.6664	11.3335	11.3199	11.5737	11.4592	11.0652	11.8397	12.5062	12.7479	13.2372	12.352	12.5305	12.4756	12.4644	12.6586	12.154
LE01Gene04444	GH31	Alpha-glucosidase	.	6635	12.3865	12.2539	11.8982	10.754	11.2547	11.1302	10.5395	11.2416	10.7832	12.8853	13.0042	13.0105	11.6025	11.2811	11.878	11.9264	11.2392	10.9836
LE01Gene09079	GH31	Galactose mutarotase-like	.	17594	11.6855	11.2836	11.6687	11.493	11.2971	11.3076	11.1803	10.7292	11.5445	11.5289	11.7019	11.832	11.8148	11.3628	12.0457	12.433	11.3685	10.9977
LE01Gene02438	GH31	Galactose mutarotase-like, Alpha-xylosidase	.	19575	11.0414	10.3306	10.8034	13.0219	11.9756	12.4512	12.9013	11.7446	12.6106	9.72539	10.7968	11.4367	12.5108	11.5291	12.3	12.6771	11.3912	13.2642
LE01Gene05961	GH35-CBM51	beta-galactosidase	Hemicellulase	10677	11.4324	10.9219	10.9204	12.8358	11.5004	11.9715	12.6876	11.2898	13.0704	10.3949	11.282	11.2251	11.3559	11.156	11.7345	12.9296	11.5339	13.6766
LE01Gene04812	GH35-CBM51	Beta-galactosidase, short chain dehydrogenase	.	7615	10.838	10.768	11.1358	13.5875	12.3133	12.8947	14.2289	12.337	14.4236	10.1691	10.1475	10.5498	11.788	11.7198	11.5169	13.0141	12.2964	12.6325
LE01Gene08777	GH35-CBM51	Beta-galactosidase	.	17106	9.40839	9.69483	9.55212	10.9248	10.1401	10.3082	11.2146	10.3594	11.4156	9.48859	9.19695	9.277	10.5244	10.4938	10.5936	11.1804	10.7089	11.9836
LE01Gene05202	GH35-CBM51	Beta-galactosidase	.	9186	6.69473	7.53844	7.36434	10.1729	9.40835	10.1185	10.2443	9.13617	10.5596	6.69903	7.24153	6.47187	9.67577	9.05937	7.74694	10.8419	9.33698	10.0364
LE01Gene13906	GH37	trehalase	Hemicellulase	5972	9.94996	10.219	10.0047	9.38952	9.79987	9.53171	9.69628	9.74322	9.91249	11.35	12.149	11.6712	10.993	11.8296	11.3269	11.1046	11.5813	10.7555
LE01Gene01228	GH37	trehalase	.	11601	13.2509	13.4206	13.0255	11.3312	11.9948	11.4935	11.2343	12.0909	11.2342	13.9393	13.7276	13.5235	12.173	12.2046	12.0781	11.8821	11.882	11.3564
LE01Gene12469	GH38	Alpha-mannosidase	.	2707	12.5528	12.5187	12.7458	12.1419	12.407	12.1787	11.9525	12.4184	12.0969	12.8554	12.9548	12.8151	12.5299	12.9106	12.7785	12.9891	12.7902	12.354
LE01Gene06836	GH39	.	.	12780	8.84815	9.2237	8.59875	11.0622	9.80891	9.2919	10.7442	9.52431	10.6782	9.21461	9.19695	9.07595	9.82313	9.22696	9.4454	9.61692	9.10615	9.31486
LE01Gene10634	GH3-CBM1	beta-glucosidase	Cellulase	21216	6.54982	5.98355	5.91026	10.0104	7.54478	7.36489	12.0812	10.3387	10.7231	5.31577	5.59151	4.96637	6.85916	6.03895	6.29405	7.46691	6.54532	11.5581
LE01Gene11715	GH43	Probable arabinan endo-1,5-alpha-L-arabinosidase	.	23367	9.8992	9.75525	10.1676	11.9596	11.6091	11.9498	12.0194	11.7006	12.2433	9.01523	8.95229	8.98122	10.6757	11.2275	10.7174	11.3137	11.4004	11.357
LE01Gene06082	GH43	Probable arabinan endo-1,5-alpha-L-arabinosidase	.	10865	8.66838	8.97174	7.85861	11.2588	9.89628	9.33935	9.18517	7.95137	9.54867	7.8762	8.38551	8.59751	9.34102	7.73234	8.76086	9.64201	7.96729	9.63814
LE01Gene06083	GH43	Probable arabinan endo-1,5-alpha-L-arabinosidase	.	10866	8.45558	8.68989	8.63552	9.96035	8.98275	9.21074	10.0746	9.45117	9.94083	8.25191	8.55403	8.40915	9.17111	9.04624	9.36632	10.0962	8.65401	10.0172
LE01Gene09852	GH43	Probable arabinan endo-1,5-alpha-L-arabinosidase	.	19247	8.5659	8.27824	8.17703	10.349	9.65207	9.52613	9.98758	9.33282	10.3703	7.64387	7.4063	7.76741	8.59091	7.84578	9.00663	9.41673	8.49125	9.67016
LE01Gene00068	GH43-CBM35	galactan 1,3–beta–galactosidase	Hemicellulase	131	9.45538	9.52324	9.37565	12.7873	11.1323	11.3852	12.9307	11.1382	13.0615	9.07358	9.17066	9.51241	10.192	10.117	10.704	11.258	10.4599	12.8589
LE01Gene10175	GH43-CBM35	galactan 1,3–beta–galactosidase	Hemicellulase	20149	9.06728	8.7932	8.8555	12.4274	10.8749	10.3254	12.4109	11.1835	11.6057	8.68518	8.4265	9.28402	9.86861	9.59287	10.1888	9.94779	9.53801	11.8568
LE01Gene10432	GH43-CBM91	Non-reducing end alpha-L-arabinofuranosidase	.	20552	10.0623	9.58933	9.78866	11.2199	10.6728	10.8338	11.3892	10.8713	11.1345	9.81518	10.5391	10.4273	11.1885	11.0135	11.4217	12.0404	11.3837	11.716
LE01Gene11301	GH47	.	.	22670	12.413	12.1006	13.0814	11.4696	12.2308	11.9865	11.6575	11.7074	12.0943	11.189	11.2986	10.9963	11.4125	11.5159	9.84595	10.2833	11.3473	11.8156
LE01Gene04451	GH47	.	.	6643	10.6792	10.0611	10.4711	10.8387	10.5506	10.3718	11.6817	10.8066	11.0274	10.3581	10.478	10.6465	10.413	10.2188	10.2053	10.419	9.71811	11.5892
LE01Gene12907	GH47	.	.	3699	12.4802	12.404	12.2566	11.8472	11.953	11.7925	12.0929	11.8221	12.1825	12.4286	12.2859	11.9266	11.5013	11.3802	11.5844	11.9579	11.5948	11.4106
LE01Gene03583	GH47	.	.	3351	11.7423	11.6885	11.5326	11.1001	11.2646	10.9292	11.3885	11.5295	11.1953	12.034	11.9011	11.807	11.3784	11.6599	11.4026	11.2296	11.4594	11.4715
LE01Gene08286	GH47	.	.	15788	11.0203	11.0283	10.5729	10.1481	10.5992	10.2439	10.2884	10.8225	10.27	11.065	11.2233	11.2776	10.5562	10.6846	11.4912	11.2058	10.7099	10.6622
LE01Gene04697	GH47	.	.	7279	11.5348	11.448	11.2147	10.9317	11.0584	10.9872	10.9912	10.9704	10.9776	11.3235	11.3405	11.0119	10.415	10.6931	10.3228	10.5805	10.6063	10.5034
LE01Gene07086	GH47	.	.	13167	7.25818	7.03669	8.28618	12.8379	11.1472	12.7576	13.2331	10.5803	13.8329	5.91205	6.09708	6.65631	11.2656	11.7444	10.4476	14.649	13.4847	13.7749
LE01Gene05828	GH5_12	mannan endo-1,5-beta-mannosidase	.	10427	11.8775	11.9226	11.6915	11.0946	11.365	11.149	11.2688	11.3479	11.3475	11.9248	11.7612	11.8363	10.985	10.9151	10.8411	11.0349	10.6969	10.3979
LE01Gene07916	GH5_12		.	15215	12.0287	11.9592	12.2721	11.7226	12.1202	11.5432	11.5583	12.1323	11.3179	11.7463	12.2028	11.8549	11.359	12.2228	11.7288	11.5528	12.1652	11.7135
LE01Gene04612	GH5_15	Glucan endo-1,7-beta-glucosidase	Cellulase	7148	9.83526	10.0663	10.6019	10.0404	10.8496	10.1247	10.8832	9.95306	10.7125	9.74511	8.32177	9.16231	13.0178	10.6223	9.73667	11.8226	9.67704	11.3422
LE01Gene07930	GH5_22	Beta-xylosidase	.	15235	11.5309	11.1348	11.2879	13.5986	12.5461	12.6275	14.4976	13.1704	13.8104	10.7987	11.5207	11.6784	12.21	11.5451	12.1162	13.5385	12.2548	15.3915
LE01Gene08669	GH5_22	Beta-xylosidase	.	16912	11.4859	11.2305	11.4849	12.2709	11.9096	12.2692	12.5719	12.0497	12.5834	11.1703	11.6435	11.6008	12.5313	12.8582	12.4326	12.7724	12.9221	12.6406
LE01Gene00726	GH5_30	mannan endo-1,5-beta-mannosidase	Hemicellulase	8233	13.8271	13.8753	13.9083	13.6891	14.1743	13.961	14.1063	14.1607	14.2424	14.1039	14.2154	13.947	13.5276	13.7706	13.3056	13.6588	13.5658	13.5049
LE01Gene07762	GH5_31	mannan endo-1,5-beta-mannosidase	.	14947	10.6456	10.5288	10.8216	11.2004	11.1555	11.272	11.2343	10.8183	11.3331	10.4074	10.3075	10.1825	11.7176	12.1182	11.2803	11.6488	12.4392	11.9554
LE01Gene08136	GH5_5	Endo-beta-1,4-glucanase	Cellulase	15556	8.48849	7.44634	7.24826	12.1035	9.60616	9.55016	11.6428	9.87051	11.9976	7.09701	6.26917	6.78065	8.68575	9.43866	8.66866	10.865	9.48708	13.4996
LE01Gene00614	GH5_50	Glucan 1,3-beta-glucosidase	.	8028	7.17077	7.17702	6.6065	6.21679	6.77165	6.72491	5.97436	6.43115	5.97402	7.35829	7.23231	7.32538	5.63395	6.29122	6.11213	6.76941	6.64161	6.0352
LE01Gene07850	GH5_50	Glucan 1,3-beta-glucosidase	.	15094	7.45599	7.08839	7.90864	8.25193	8.90623	8.85481	9.11745	9.45331	9.52684	7.94601	8.77957	8.51637	9.39415	10.9808	10.1913	9.84016	11.0865	10.1225
LE01Gene01096	GH5_5-CBM1	endo-beta-1,4-glucanase	Cellulase	11376	6.93648	6.69367	7.0545	11.7248	8.6149	7.10027	13.2002	11.8092	11.7657	7.14728	6.45496	6.98976	7.63255	7.81515	8.19122	8.37346	7.45164	12.9499
LE01Gene04104	GH5_5-CBM1	endo-beta-1,4-glucanase	Cellulase	5514	8.89254	8.58582	8.70006	12.0479	10.0604	9.64418	13.6515	12.3748	12.1988	7.7647	8.01823	8.02934	8.64923	8.75822	8.87317	8.89409	8.61105	13.9772
LE01Gene12259	GH5_5-CBM1	endo-beta-1,4-glucanase	Cellulase	1996	9.79345	9.10573	7.57174	7.71262	7.15847	6.15963	4.91248	4.37593	4.62167	8.36667	9.46234	9.28868	5.19211	5.08147	5.60033	6.31143	4.95806	6.66318
LE01Gene05890	GH5_7-CBM1	mannan endo-1,4-beta-mannosidase	.	10572	9.7534	9.64563	8.95408	13.1888	10.5966	9.2383	14.0511	12.2046	12.9379	8.53092	8.77957	8.54393	8.2532	7.74539	8.01809	8.69451	7.61077	12.6449
LE01Gene11268	GH5_7-CBM1	mannan endo-1,4-beta-mannosidase	.	22615	7.00883	7.02613	7.21331	13.6508	11.0413	9.51491	14.3076	12.3657	13.4386	6.34999	5.72891	7.72677	6.41305	7.40225	7.82788	7.30232	6.93554	13.008
LE01Gene11040	GH5_9	Glucan 1,3-beta-glucosidase	.	21901	13.1379	13.698	12.975	10.9834	12.0027	11.2978	9.98586	12.1379	10.2753	13.6479	13.2276	13.0631	10.9369	11.1742	10.8914	9.46295	10.9738	10.7802
LE01Gene11039	GH5_9	Glucan 1,3-beta-glucosidase	.	21899	12.3746	12.5525	13.1003	12.8198	14.0725	13.1899	12.6267	14.1799	13.1577	11.6476	11.2606	11.7078	12.5433	12.8966	13.3115	12.749	12.8488	13.0872
LE01Gene13053	GH5_9	Glucan 1,3-beta-glucosidase	.	3948	13.4174	13.1286	13.2405	13.2387	13.4897	13.1654	13.3029	13.5566	13.267	13.3008	13.4231	13.56	13.3493	13.5585	13.5595	13.6106	13.6516	13.2231
LE01Gene01071	GH5_9	Glucan 1,3-beta-glucosidase	.	11327	10.6832	10.6054	10.8588	10.6315	10.9952	10.9543	10.7185	10.9919	10.7402	10.3908	10.7882	10.886	11.342	12.0071	11.5381	10.8535	11.7265	11.5766
LE01Gene07605	GH5_9	Glucan 1,3-beta-glucosidase	.	14671	10.3939	10.179	10.3785	11.3143	10.7142	11.2507	11.4936	10.8841	11.2416	10.098	10.3854	10.442	10.8858	10.7781	10.8272	10.6363	10.7768	11.3288
LE01Gene12502	GH5_9	Glucan 1,3-beta-glucosidase	.	2760	13.3091	13.1869	13.0198	11.9882	12.4459	12.256	11.9503	12.3494	12.127	12.9309	12.9954	12.9509	12.6143	12.611	12.724	12.6028	12.4536	12.418
LE01Gene06046	GH51	alpha-L-arabinofuranosidases	Hemicellulase	10819	11.3636	11.1274	11.0046	13.1326	11.6961	11.5934	12.3001	11.0805	12.6223	11.1095	11.5126	11.3463	10.5217	10.1868	10.3193	10.7392	9.7776	12.0134
LE01Gene08142	GH51	alpha-L-arabinofuranosidases	Hemicellulase	15565	9.63429	9.44012	9.5695	9.51505	9.06801	8.91583	8.84037	8.78797	8.99572	9.21697	9.4916	9.96385	9.92246	8.93099	9.36858	9.18421	8.4161	9.86104
LE01Gene09692	GH51	alpha-L-arabinofuranosidases	Hemicellulase	18982	8.48124	7.82721	8.48245	10.8049	9.45897	10.4486	9.93491	8.72198	11.0181	7.57209	8.74435	9.21957	10.2836	9.79943	10.381	11.9094	10.2896	10.5747
LE01Gene05074	GH53	endo-beta-1,5-galactanase	Pectinase	8982	7.09682	6.46245	5.62123	9.63617	8.38048	8.26546	9.81956	8.51195	9.28037	6.06631	6.9012	7.02371	7.20857	6.34367	8.34579	9.93692	7.27276	9.80766
LE01Gene05090	GH53	endo-beta-1,5-galactanase	.	9003	9.11254	8.75212	9.01624	11.6832	10.5335	11.1736	10.7421	9.39432	11.4227	5.95783	7.36473	8.28866	10.1319	8.83655	9.61272	12.0048	9.94734	11.9184
LE01Gene12491	GH55	Pectate_lyase	.	2739	8.52066	8.37301	8.80651	10.096	9.92841	9.94951	10.2828	10.1079	10.0258	8.21468	8.42245	8.2652	9.82462	9.6702	9.4282	9.73465	9.53174	9.59616
LE01Gene05622	GH55	Pectate_lyase	.	10056	9.21877	8.58221	8.95408	11.3084	9.97732	10.2382	10.488	8.66027	10.2274	7.73214	8.58694	9.10795	11.239	10.6241	9.81816	10.7979	10.3502	10.0595
LE01Gene05621	GH55	Pectate_lyase	.	10055	11.4106	11.3925	11.2047	10.8732	10.8583	10.7121	10.5301	10.6027	10.539	10.798	10.8277	10.7208	10.3503	10.1554	10.4228	10.3244	10.2314	10.1556
LE01Gene02409	GH63	Glycosyl hydrolase family 63 C-terminal domain	.	19516	12.6802	12.5171	12.4541	12.1564	12.2536	12.1101	12.189	12.3697	12.1065	12.8618	12.9004	12.8113	12.0235	11.9451	12.4824	12.3399	11.8109	11.9712
LE01Gene10050	GH6-CBM1	1,4-beta-cellobiosidase	Cellulase (CBHⅡ)	19936	10.2165	10.563	10.3646	13.4842	11.0909	10.3329	14.6269	13.5378	13.3505	9.78216	8.63669	9.35907	10.1222	9.90354	9.99358	10.4994	10.3419	15.4318
LE01Gene07961	GH7	1,4-beta-cellobiosidase	Cellulase (CBHⅠ)	15273	8.04806	7.39799	7.12202	13.4116	11.6347	9.44762	12.1728	9.93017	12.7067	6.06631	6.66133	5.79371	7.71839	8.17974	7.26558	7.44075	7.73238	8.64174
LE01Gene12864	GH7	1,4-beta-cellobiosidase	Cellulase (CBHⅠ)	3643	8.3159	8.34353	7.61256	14.6089	10.6587	10.9107	14.4173	12.0215	15.3927	7.69207	7.38982	7.14177	8.64249	6.60946	9.4896	12.8033	7.09143	10.8672
LE01Gene04239	GH71	Glycosyl hydrolase family 71	.	6055	12.2999	12.1847	11.8205	10.6049	10.84	10.8797	9.83113	10.4924	10.3368	12.2578	12.209	11.853	10.3901	10.0115	10.8532	10.6611	10.4979	9.97224
LE01Gene08438	GH71	Glycosyl hydrolase family 71	.	16566	10.3084	10.4381	10.1469	10.019	9.76934	10.0502	9.66213	9.69334	9.7239	10.5929	10.4945	10.3811	9.66915	9.94657	9.85564	9.81322	9.85997	9.82515
LE01Gene06228	GH71	Glycosyl hydrolase family 71	.	11102	7.26663	6.29652	7.48648	9.83699	8.56244	8.53366	8.38117	7.19594	8.34888	6.22451	5.80548	6.33435	6.33158	6.78408	6.25556	7.1165	6.74639	5.79819
LE01Gene03858	GH71	Calpain family cysteine protease	.	4752	11.3724	11.1274	11.159	11.0355	11.322	11.2043	11.4592	11.752	11.4732	11.1057	11.4534	11.291	11.4821	11.6139	11.4979	11.5543	11.6167	11.524
LE01Gene00554	GH71	Glycosyl hydrolase family 71	.	7949	5.91632	6.49346	6.53753	8.02461	7.3019	7.59554	8.17861	7.64895	8.41693	7.57209	7.56155	7.72677	7.38853	7.63048	8.54245	8.20234	7.50382	7.81089
LE01Gene04265	GH71	Glycosyl hydrolase family 71	.	6101	7.2834	7.12846	7.88662	10.623	10.0717	9.51303	10.323	8.67503	10.4766	6.60145	8.14642	6.84536	10.0941	10.0182	9.45817	10.5654	10.3526	10.418
LE01Gene05133	GH71	WSC domain Glycosyl hydrolase family 71	.	9066	9.04041	9.15263	8.41098	8.79224	8.54812	8.76606	9.04971	9.30699	8.75407	9.0447	8.73132	9.09204	9.1475	9.27501	9.09649	9.34801	9.13676	9.47852
LE01Gene11756	GH71	Glycosyl hydrolase family 71	.	23430	7.96216	7.68669	7.7285	7.63223	7.4632	7.99081	8.02582	7.60338	8.16325	7.14728	7.17574	7.68494	8.43971	7.88759	7.95942	8.26332	7.71773	8.42115
LE01Gene08573	GH72-CBM35	Glucanosyltransferase X8 domain	.	16772	13.9036	13.8625	13.6573	12.256	12.3825	12.5335	12.2278	11.8924	12.5653	14.2144	14.2652	14.2084	12.8872	13.1538	12.8466	13.0291	13.0506	12.8389
LE01Gene07273	GH74-CBM1	xyloglucanase	Hemicellulase	13507	7.74333	7.56057	6.87604	12.6528	10.0285	8.27437	13.5209	11.7181	12.4339	7.57943	7.69501	7.03485	7.73749	6.7061	7.58564	7.77679	7.19026	12.3123
LE01Gene12054	GH75	Fungal chitosa.se of glycosyl hydrolase group 75	.	1688	11.1625	12.5332	11.8349	9.15334	10.1472	9.27203	8.84799	9.50792	9.32406	13.1106	12.9055	12.2717	11.8364	11.8569	11.6185	10.887	11.7764	9.80766
LE01Gene02160	GH76	mannan endo-1,6-alpha-mannosidase	.	17967	7.97254	7.51596	8.0785	12.7701	11.1719	11.4282	11.8013	9.69515	12.088	6.71244	7.97468	7.44714	8.36797	8.2177	8.29924	8.6982	7.79653	9.50243
LE01Gene07201	GH76	mannan endo-1,6-alpha-mannosidase	.	13360	6.3091	5.86997	6.69784	8.29053	7.44012	8.24296	8.37591	7.14384	9.49571	4.04717	5.67551	5.74026	7.17159	7.65835	7.65382	10.8377	8.57898	8.87027
LE01Gene10232	GH76	.	.	.	7.83716	7.1383	8.34792	11.7248	9.93255	10.7933	10.025	8.12267	10.9058	6.29754	6.40661	6.5516	8.29248	6.99553	7.31321	7.74863	7.29267	7.73218
LE01Gene10275	GH76	.	.	.	10.09	10.0204	9.34772	8.32813	8.14868	8.29201	8.19064	7.64895	8.14617	10.668	11.1826	10.765	9.70518	10.176	9.58582	9.16569	10.4288	9.01027
LE01Gene07596	GH78	alpha-L-rhamnosidase	Pectinase	14657	8.43697	8.4814	8.58855	10.2174	8.99599	9.08985	9.85779	8.96656	10.0443	7.31497	7.98019	8.84228	10.1977	9.20822	10.1888	11.905	9.4521	11.524
LE01Gene11720	GH78	alpha-L-rhamnosidase	Pectinase	23375	7.94646	7.85732	8.62558	10.6567	9.77088	10.4515	10.4597	9.98599	10.931	6.99091	7.76059	8.11057	9.77925	10.5348	10.3731	11.6165	11.319	11.1154
LE01Gene00028	GH79	.	.	48	11.2038	11.2282	10.8252	10.6211	10.9173	10.7088	10.6073	10.8225	10.7478	11.0145	11.1904	11.078	10.6716	10.4899	10.3618	10.3339	10.2067	10.5943
LE01Gene09636	GH79	.	.	18879	9.665	9.51004	10.2732	11.9008	11.5922	11.8924	12.1089	11.3548	12.7738	8.61547	8.68478	8.48422	11.0704	10.9731	10.7076	12.2036	11.3389	11.7113
LE01Gene06732	GH79	.	.	12608	9.53803	8.97724	10.0199	11.428	10.69	11.3888	12.0869	10.7787	11.9042	8.87611	8.84452	8.40915	10.4598	10.6417	10.2241	9.80641	10.5853	11.1637
LE01Gene05168	GH79	.	.	9128	11.6292	11.3138	11.7502	12.3708	12.6801	12.4053	12.6494	12.7457	12.6424	10.5974	10.5325	10.6264	11.5381	11.748	11.5654	11.4252	11.7131	11.5915
LE01Gene00946	GH79	.	.	8628	7.59678	7.18654	8.45653	9.70209	8.73984	9.35202	9.51918	8.09549	10.0942	7.44925	8.27316	8.32088	10.7481	10.0749	10.2946	11.9074	10.095	10.7655
LE01Gene07396	GH79	Bystin	.	13703	11.0616	10.9771	11.0683	12.1267	11.3418	11.5228	12.3695	11.4867	12.0876	10.6172	10.4009	10.5985	10.8664	10.8845	11.2616	11.0379	10.7264	11.4527
LE01Gene10317	GH79	.	.	20409	10.7593	9.95785	10.3815	10.8953	10.6512	10.6527	10.5336	10.0777	10.8133	10.1788	10.072	9.65462	10.0965	10.1987	9.58388	10.4973	10.3202	10.1755
LE01Gene04089	GH7-CBM1	1,4-beta-cellobiosidase	Cellulase (CBHⅠ)	5490	8.8283	8.61783	8.56101	11.3271	9.54979	9.36041	13.6929	12.4113	12.1428	8.62615	8.38551	8.98122	9.00763	9.05675	9.09649	9.35503	8.6807	16.3791
LE01Gene04829	GH7-CBM1	1,4-beta-cellobiosidase	Cellulase (CBHⅠ)	7653	10.8514	10.2409	9.4526	14.4536	11.3475	10.0898	15.7533	14.0925	14.3214	9.29038	9.82467	9.88755	10.3616	10.714	10.6751	10.45	10.8533	16.0262
LE01Gene01164	GH85	Glycosyl hydrolase family 85	.	11491	11.1827	10.9758	11.0853	11.9202	11.5874	11.7332	12.2956	11.5906	12.173	10.466	10.5604	11.0467	12.1474	12.1169	11.8468	11.9162	11.8441	11.9539
LE01Gene08827	GH88	Cytochrome P450 Glycosyl Hydrolase Family 88	.	17178	10.2857	10.3057	10.0998	10.1481	10.2134	10.4218	10.7132	10.3035	10.8768	9.89678	9.72634	9.31406	9.72923	9.39169	10.0718	10.183	9.8516	10.1328
LE01Gene08227	GH9	Endo-beta-1,4-glucanase	Cellulase	15685	11.76	11.5721	11.5754	10.5202	10.8393	10.471	10.2284	10.4924	10.1834	11.3834	11.327	11.2753	10.0141	9.83039	9.94452	9.77185	9.50212	9.6684
LE01Gene07926	GH92	Uncharacterized secreted glycosidase	.	15227	11.0291	10.354	10.8834	12.0563	11.4882	11.9667	11.9529	10.794	12.3036	9.99611	10.5306	10.4944	11.9252	11.4406	11.4766	12.4663	11.6236	11.9002
LE01Gene04001	GH92	Uncharacterized secreted glycosidase	.	5009	8.69368	8.68989	9.98666	11.3484	10.3803	11.7473	12.4132	10.3329	13.2685	7.8762	8.46635	8.84228	11.6465	12.2702	10.4624	12.849	13.0057	13.926
LE01Gene09210	GH92	Uncharacterized secreted glycosidase	.	18259	11.6949	11.7192	12.1474	13.0364	12.6729	12.6924	13.2473	12.02	13.0794	10.1158	9.96621	10.3277	11.099	11.1814	10.3573	11.2026	11.3952	11.6754
LE01Gene09149	GH92	Glycosyl hydrolase family 92	.	17700	9.07211	9.31984	9.1881	10.039	9.35999	9.30717	10.908	10.5754	10.4054	9.238	9.26632	9.70779	9.66583	9.35171	9.88115	9.18421	9.34892	13.1791
LE01Gene11792	GH92	Kinesin-like protein KIN-7L	.	23502	12.8403	12.4505	12.4154	11.4648	11.4565	11.3655	11.4814	11.1242	11.5559	12.978	13.1688	12.8971	11.9933	12.131	12.0251	12.2505	12.0032	11.4289
LE01Gene03844	GH93	.	.	4292	6.92585	6.00523	6.6594	9.05024	7.55197	7.70496	8.45784	6.83764	8.41217	5.93512	6.675	7.22195	9.37395	8.39798	8.6428	11.1416	8.58706	9.55863
LE01Gene04279	GH95	Alpha-fucosidase	Hemicellulase	6124	11.2278	10.779	11.4492	12.4339	11.6557	12.1484	12.2227	11.011	12.6186	10.5478	10.8338	11.2758	12.1294	11.8204	11.9082	12.4941	11.3184	11.7733
LE01Gene05191	GH95-CBM13	Alpha-fucosidase	Hemicellulase	9168	10.3418	10.8001	10.9859	11.5632	11.2997	11.2495	11.3608	10.8414	11.6837	10.2426	9.75075	10.4974	9.71163	9.5692	10.0979	11.097	10.0533	11.1154
LE01Gene00535	GT1	UDP-glucoronosyl and UDP-glucosyl transferase	.	7916	10.2208	9.93262	10.3903	11.1041	10.6892	10.9425	11.2183	10.7589	11.0665	10.261	10.1981	10.5928	11.404	11.3001	10.9841	10.856	10.8458	10.5615
LE01Gene13736	GT1	UDP-glucoronosyl and UDP-glucosyl transferase	.	5730	8.54172	8.47753	8.91654	10.4706	11.066	10.0973	10.0484	11.8479	9.76551	7.9057	7.50909	7.2509	9.25083	9.08012	9.32277	9.16036	9.19346	9.58126
LE01Gene00561	GT1	UDP-glucoronosyl and UDP-glucosyl transferase	.	7958	10.0768	9.76799	9.98407	11.0775	10.927	11.0866	11.3721	11.3317	11.3605	9.93161	10.404	10.6726	11.5535	12.1325	12.0705	11.58	12.2211	11.8089
LE01Gene12435	GT1	UDP-glucoronosyl and UDP-glucosyl transferase	.	2647	9.90327	10.212	9.74802	9.71811	9.42803	9.60942	9.75215	9.5645	9.60809	9.93734	9.86995	9.68852	9.64237	9.51687	9.48337	9.71295	9.53384	9.6631
LE01Gene13733	GT1	UDP-glucoronosyl and UDP-glucosyl transferase	.	5725	6.75607	7.4304	7.83581	9.09999	8.90623	9.35202	10.0013	9.37637	10.1959	7.72554	8.0605	7.52031	9.57848	10.2281	8.92927	10.1817	9.93314	10.5775
LE01Gene13734	GT1	UDP-glucoronosyl and UDP-glucosyl transferase	.	5728	11.297	11.031	11.8704	13.4038	12.4408	12.7127	12.8135	11.0153	11.9214	11.2858	11.5493	10.924	12.171	11.2546	10.2671	10.4067	10.5567	12.183
LE01Gene11480	GT1	.	.	.	9.90327	10.0097	9.90276	9.31188	9.36612	9.47104	9.21198	9.24898	9.37627	9.88646	9.61197	9.81023	9.85263	9.37709	9.55049	9.35269	9.40715	9.56622
LE01Gene08099	GT1	PH domain GRAM domain	.	15506	11.6597	11.5712	11.5081	10.7932	11.0142	10.8606	10.8061	11.3594	10.945	11.6991	11.7791	11.8853	11.2857	10.8479	10.8354	11.1922	10.6705	10.7712
LE01Gene04162	GT1	UDP-glucoronosyl and UDP-glucosyl transferase	.	5599	4.76007	4.94017	5.48133	2.84818	3.49394	3.84152	4.16869	0.1	4.8638	4.54393	4.47249	4.65594	4.07958	4.5378	3.21153	4.16637	4.90731	4.31306
LE01Gene02420	GT15	Glycolipid 2-alpha-mannosyltransferase	.	19542	11.6649	11.7993	12.3523	12.2703	12.8098	12.7022	12.7079	12.7437	12.9453	10.6808	10.3485	10.5312	11.4312	12.3401	11.1805	11.9181	12.7768	11.9073
LE01Gene14235	GT15	Glycolipid 2-alpha-mannosyltransferase	.	6972	8.81683	9.03371	8.99581	9.90855	9.75695	9.88557	10.4104	9.62467	10.3038	8.41671	8.44656	8.30716	9.05154	9.19163	9.10733	9.35736	9.54218	9.63453
LE01Gene10739	GT15	Glycolipid 2-alpha-mannosyltransferase	.	21402	10.0204	10.5005	10.7804	10.2978	10.6612	10.4681	10.4672	11.0204	10.2818	9.50218	9.50122	9.01818	9.72605	9.90354	9.78307	9.54301	9.98759	9.79803
LE01Gene02921	GT15	Glycolipid 2-alpha-mannosyltransferase	.	22386	10.8451	10.6551	10.601	9.81895	10.3893	9.88412	10.0582	10.4426	10.1466	10.6163	10.6039	10.2605	9.56962	9.56368	10.2887	10.106	9.66564	10.0005
LE01Gene00749	GT15	Glycolipid 2-alpha-mannosyltransferase	.	8276	12.463	12.7435	12.4999	12.4387	12.3338	12.4051	12.7774	12.4375	12.6571	12.7753	12.5428	12.4151	11.9666	12.0903	12.0318	12.1257	12.2427	12.1709
LE01Gene00748	GT15	Glycolipid 2-alpha-mannosyltransferase	.	8275	11.4863	11.5335	11.7517	12.8995	12.2602	12.478	12.9111	12.1419	12.6248	10.7287	10.8046	10.7034	11.5207	11.7841	11.1689	11.1981	11.5958	11.2627
LE01Gene02724	GT15	Glycolipid 2-alpha-mannosyltransferase	.	21080	9.32177	9.62653	9.54687	10.8732	10.7142	11.0047	11.2716	10.8225	11.3337	9.02601	8.91534	9.26522	10.2717	10.7107	10.0565	10.3551	10.5308	10.4054
LE01Gene14236	GT15	Glycolipid 2-alpha-mannosyltransferase	.	6975	8.0963	7.80883	8.31119	9.00162	8.79847	9.00145	9.33902	8.83474	9.25935	7.73214	7.12685	7.63457	7.81747	7.97885	7.71892	8.58332	8.34637	8.33054
LE01Gene06794	GT15	Glycolipid 2-alpha-mannosyltransferase	.	12705	11.1106	11.2085	11.1194	11.4925	11.4929	11.4277	11.5117	11.5769	11.3306	11.6533	11.6561	11.5994	11.6334	12.1599	11.6991	10.9648	12.0387	11.4232
LE01Gene00134	GT15	Glycolipid 2-alpha-mannosyltransferase	.	254	8.3159	8.77439	8.59875	9.65848	9.38437	9.90863	9.73992	9.47033	9.34916	8.13223	8.28658	8.00122	8.97044	9.46849	8.91081	9.16835	9.41625	9.77695
LE01Gene04485	GT17	Glycosyltransferase family 17	.	6712	11.8057	11.8946	11.5883	11.37	11.5188	11.3525	11.2913	11.4587	11.5009	12.1196	11.8223	11.9326	11.3976	11.1474	11.554	11.4813	11.2784	10.8525
LE01Gene11286	GT20	Glycosyltransferase family 20 Trehalose-phosphatase	.	22641	11.8248	11.5349	11.614	11.9393	11.7062	11.9253	11.783	11.4072	11.6807	11.6619	11.8208	12.2688	12.2873	11.8349	12.1936	11.956	11.6634	12.0141
LE01Gene12625	GT20	Glycosyltransferase family 20	.	2939	11.972	11.7245	12.8196	14.3049	13.9611	14.4128	14.4074	13.5185	13.7116	11.5303	11.7214	12.0904	13.4547	13.0796	11.9793	11.8959	12.4998	14.7743
LE01Gene13404	GT20	Glycosyltransferase family 20 Trehalose-phosphatase	.	4676	12.532	12.1461	12.3288	15.5074	14.8509	15.1671	15.5029	14.4389	14.6004	12.3273	12.4526	13.0927	14.7196	14.1368	13.5844	12.7772	13.2469	15.1247
LE01Gene00486	GT21	Glycosyltransferase like family 2	.	897	11.7004	12.1069	11.4963	10.0891	10.3024	10.0605	9.65997	10.3329	9.95562	12.374	12.1597	12.1076	10.6253	10.3697	10.3675	10.5614	10.3287	10.2231
LE01Gene00318	GT22	Alg9-like mannosyltransferase family	.	596	11.5296	11.2747	11.0573	9.94228	10.5344	9.88702	9.6857	10.6724	10.1623	11.5213	11.5026	11.2611	10.417	10.3247	10.3436	10.3232	10.0992	9.75056
LE01Gene12834	GT22	Alg9-like mannosyltransferase family	.	3599	10.2616	10.3708	9.95791	9.45684	9.4123	9.69314	9.44578	9.45545	9.55083	10.2275	10.2063	10.3026	9.5391	8.97044	9.78982	9.45426	9.15862	9.48653
LE01Gene04560	GT22	Alg9-like mannosyltransferase family	.	6842	9.3677	9.14288	9.01116	8.82219	8.82246	8.80345	8.65308	9.22661	8.71599	9.11458	9.05257	9.50442	8.11882	8.67197	9.00953	9.2409	8.78276	8.67719
LE01Gene05184	GT24	Glycosyl transferase family 8 UDP-glucose:Glycoprotein Glucosyltransferase	.	9155	12.0259	11.9459	11.5555	11.1068	11.3209	11.0656	10.927	11.5581	10.8321	12.4448	12.4635	12.6497	11.4292	11.4376	12.1118	12.2197	11.5124	10.9786
LE01Gene05155	GT25	.	.	.	9.14042	9.43813	8.93006	9.29299	8.82543	9.17314	8.91479	8.60738	8.4728	9.57926	9.60127	9.45965	8.74673	9.0007	9.28982	8.9037	8.88466	8.79159
LE01Gene05153	GT25	.	.	.	9.93014	10.0257	9.43185	8.60198	8.53729	8.78487	8.64436	7.9932	8.09368	11.336	11.0207	11.0712	10.2738	10.8637	11.7861	10.5895	10.8211	8.87943
LE01Gene00621	GT28	Glycosyltransferase family 28 C-terminal domain	.	8042	8.81395	9.527	9.25193	9.54929	9.49487	9.64418	9.26983	9.27828	9.18044	8.90561	8.46635	8.5786	8.98116	8.44274	8.51012	8.42329	8.9362	8.98504
LE01Gene01015	GT3	Glycogen synthase	.	11239	12.7986	12.5222	12.894	12.0692	12.2801	12.101	12.2113	12.2577	11.8196	13.3346	13.7829	13.7136	13.3336	14.0129	13.3834	13.1385	13.6995	13.7924
LE01Gene03134	GT31	.	.	1102	12.6333	12.3569	12.1624	11.769	12.0034	11.9602	11.866	12.1005	12.1974	12.6556	13.0525	13.2819	12.5505	12.6725	12.7763	12.388	12.2376	12.2627
LE01Gene01506	GT32	Glycosyltransferase sugar-binding region containing DXD motif	.	14027	12.4363	12.402	11.9512	12.1139	11.9786	12.0077	12.2202	12.2233	12.2632	12.5536	12.6335	12.868	12.9999	12.912	13.1358	12.9486	12.6468	12.8908
LE01Gene00043	GT33	Glycosyl transferases group 1	.	77	10.5186	10.6282	10.1573	9.89138	10.1172	10.0054	10.0549	10.0326	9.87669	10.8413	10.7507	10.7191	9.83056	10.3291	10.6013	10.2283	10.319	10.2231
LE01Gene08549	GT35	Carbohydrate phosphorylase	.	16731	14.005	13.7457	14.1496	13.7852	13.9235	13.8797	13.8259	13.9342	13.7642	14.0452	14.333	14.4075	14.3489	14.8841	14.4919	14.9384	15.035	14.8172
LE01Gene07250	GT39	Dolichyl-phosphate-mannose-protein mannosyltransferase MIR domain	.	13465	12.3736	12.2242	12.0729	11.6188	11.6591	11.6102	11.8749	11.6742	11.7493	12.5031	12.6642	12.8023	12.0418	12.0306	12.3359	12.2992	11.6475	11.7818
LE01Gene10924	GT39	Dolichyl-phosphate-mannose-protein mannosyltransferase MIR domain	.	21716	13.488	13.2625	12.9303	11.9559	12.1792	11.9154	11.8777	12.2561	12.1013	13.4208	13.4315	13.3872	11.7703	11.9086	12.1647	12.4915	11.9607	11.9199
LE01Gene08458	GT39	Dolichyl-phosphate-mannose-protein mannosyltransferase MIR domain	.	16594	13.1024	12.8012	12.651	12.0436	12.0754	11.868	12.1785	12.0362	12.1521	13.3524	13.4694	13.491	12.2683	11.9931	12.5604	12.53	11.8844	11.856
LE01Gene02304	GT4	Glycosyl transferases group 1	.	18232	9.63102	9.90116	9.8945	9.48624	9.78469	9.74371	9.92954	10.0497	9.76737	10.2449	10.2181	10.2305	9.78844	9.89038	10.2015	10.7789	10.1962	9.78672
LE01Gene00638	GT4	Glycosyl transferases group 1	.	8067	14.256	13.8724	14.922	15.2764	15.6513	15.3287	15.1578	15.9052	15.116	13.3172	13.5191	13.419	15.0713	15.0557	14.7591	14.7386	14.7659	14.9405
LE01Gene05346	GT4	Glycosyl transferases group 1	.	9504	10.0192	9.89391	9.87367	9.12691	9.3984	9.24963	9.09842	9.05386	8.84862	10.5108	10.1682	10.5361	9.43957	9.28399	10.0297	10.3124	9.64255	8.92438
LE01Gene04115	GT4	Glycosyl transferases group 1 PIGA (GPI anchor biosynthesis)	.	5534	10.3468	10.226	10.04	9.94833	10.0591	10.2586	9.88581	10.1937	9.95725	10.2564	10.2595	10.886	10.2069	10.4841	10.9209	10.6286	10.2506	10.2171
LE01Gene02947	GT48	1,3-beta-glucan synthase subunit FKS1, domain-1	.	22424	13.3489	13.1153	13.1414	12.8802	12.8907	13.0425	13.1111	13.0155	13.0876	13.8636	14.1871	14.1196	13.6182	14.2745	13.7357	13.8837	14.2519	13.476
LE01Gene00720	GT48	1,3-beta-glucan synthase subunit FKS1, domain-1	.	8225	13.8348	13.7112	13.504	13.3697	13.2195	13.318	13.4095	13.3057	13.3289	14.1151	14.2172	14.1801	13.6545	13.7193	13.403	13.895	13.8781	13.2759
LE01Gene03872	GT49	Glycosyl-transferase for dystroglycan	.	4787	6.81491	6.41464	6.97326	7.63973	8.01972	8.08997	8.64436	7.44877	8.56993	7.00188	6.64753	7.21217	8.46667	8.19884	7.11247	6.98991	7.61868	7.75889
LE01Gene03331	GT57	ALG6, ALG8 glycosyltransferase family	.	2226	11.3507	10.9198	10.9657	10.2906	10.5106	10.5935	10.3514	10.7292	10.5735	11.5902	11.7783	12.2039	11.4366	11.501	11.8996	11.5178	11.1252	11.0323
LE01Gene08264	GT57	ALG6, ALG8 glycosyltransferase family	.	15748	10.3227	10.298	10.3171	10.0475	9.97732	10.1955	9.95797	10.0777	10.1959	10.5261	10.5484	10.369	9.969	10.5792	10.3954	10.4313	10.3655	10.1122
LE01Gene00615	GT58	ALG3 protein	.	8033	10.432	10.5062	10.2984	9.92858	10.1317	10.0618	9.78823	10.0915	9.81499	10.4094	10.2227	10.3311	9.92107	10.098	10.3205	10.1032	10.1762	10.1341
LE01Gene00093	GT59	DIE2/ALG10 family	.	182	11.5796	11.3935	11.2705	10.3683	10.6785	10.612	9.79021	10.327	10.3788	11.5426	11.6388	11.2641	10.4798	10.2772	10.5345	10.4983	10.1313	10.2887
LE01Gene01107	GT66	Oligosaccharyl transferase STT3 subunit	.	11398	14.1587	13.9648	13.6454	12.3971	12.7313	12.3451	12.3705	12.7747	12.4031	14.3482	14.4192	14.253	12.6139	12.5199	13.0726	13.4374	12.5999	12.5643
LE01Gene05799	GT69	Cryptococcal mannosyltransferase 1	.	10374	12.3596	12.3632	12.0078	10.7048	11.2976	10.8033	10.8823	11.3165	11.0157	12.6353	12.504	12.4913	11.1185	11.1535	11.3652	11.4663	11.1119	10.8595
LE01Gene09778	GT69	.	.	.	12.3993	12.4861	12.0362	10.4842	10.9277	10.4902	10.3805	11.1508	10.5081	12.9499	12.7112	12.6806	10.9007	10.659	11.0945	11.1491	10.4936	10.307
LE01Gene01769	GT76	Mannosyltransferase (PIG-V)	.	16083	10.6136	10.6317	10.7264	11.5039	11.0603	11.2764	11.8111	11.0596	12.0169	10.9258	11.0584	11.0055	11.3636	11.9462	11.5169	11.2839	11.8721	12.0429
LE01Gene03427	GT8	Glycosyl transferase family 8	.	2388	10.6456	10.7048	11.0243	11.3923	11.0161	11.4222	10.8924	10.9659	10.9508	10.7254	10.5696	10.7898	11.2579	11.148	11.4026	11.2416	11.0394	11.1122
[truncated: 19 more rows]

## Sheet: CBM domain-containing
gene_ID	CAZyme family	cs_1_a	cs_1_b	cs_1_c	cs_2_a	cs_2_b	cs_2_c	cs_3_a	cs_3_b	cs_3_c	ow_1_a	ow_1_b	ow_1_c	ow_2_a	ow_2_b	ow_2_c	ow_3_a	ow_3_b	ow_3_c
[truncated: 59 more rows]

[truncated: 3 more sheets: Carboxylic acid metabolism, N transportation, Ribosomal_protein]
