# Supplementary material for: Comparative analysis of simulated in-situ colonization and degradation by Lentinula edodes on oak wafer and corn stalk
Source: Front Microbiol. 2023 Nov 23;14:1286064. doi: 10.3389/fmicb.2023.1286064 (PMC10701760; doi:10.3389/fmicb.2023.1286064)
Supplement: Supplementary file 2 [file Data_Sheet_2.XLSX]

## Sheet: ow_2-VS-ow_1
Gene_id	ow_1_a	ow_1_b	ow_1_c	ow_2_a	ow_2_b	ow_2_c	log2FoldChange	pvalue	padj	id	sprot_Top_BLASTX_hit	Pfam	eggnog	Kegg	gene_ontology_blast	gene_ontology_pfam
>LE01Gene09110	0	0	0	9.07176	10.3323	8.38197	11.9611	1.41e-06	5.7e-06	>LE01Gene09110	.	.	.	.	.	.
>LE01Gene13762	0	0	0	8.00256	7.93394	7.27524	10.2365	1.57e-12	1.64e-11	>LE01Gene13762	FUS6_GIBF5^FUS6_GIBF5^Q:16-1485,H:20-516^34.9%ID^E:6.4e-87^RecName: Full=Efflux pump FUS6 {ECO:0000303|PubMed:23932525}	PF07690.15^MFS_1^Major Facilitator Superfamily^24-422^E:2.4e-35`PF06609.12^TRI12^Fungal trichothecene efflux pump (TRI12)^28-363^E:1e-17	.	.	GO:0016021^cellular_component^integral component of membrane`GO:0005886^cellular_component^plasma membrane`GO:0005774^cellular_component^vacuolar membrane`GO:0055085^biological_process^transmembrane transport	GO:0055085^biological_process^transmembrane transport`GO:0016021^cellular_component^integral component of membrane`GO:0022857^molecular_function^transmembrane transporter activity
>LE01Gene05901	0	0	0	6.99236	7.91674	6.19582	9.66513	3.67e-14	5.13e-13	>LE01Gene05901	HETE1_PODAS^HETE1_PODAS^Q:279-1274,H:277-622^25.1%ID^E:5.8e-12^RecName: Full=Vegetative incompatibility protein HET-E-1	PF13401.5^AAA_22^AAA domain^86-217^E:3e-07`PF05729.11^NACHT^NACHT domain^90-229^E:5.7e-08	.	.	.	.
>LE01Gene09114	0	0	0	7.03416	6.7194	4.99944	8.93818	2.11e-08	1.14e-07	>LE01Gene09114	.	.	.	.	.	.
>LE01Gene05538	0	0	0	6.57756	6.52114	4.99944	8.64301	2.94e-06	1.13e-05	>LE01Gene05538	.	.	.	.	.	.
>LE01Gene13771	0	2.27934	2.332	9.72126	10.4123	8.58963	8.36385	3.36e-31	5.04e-29	>LE01Gene13771	EGT2_NEUCR^EGT2_NEUCR^Q:61-1326,H:26-473^30.7%ID^E:2.9e-60^RecName: Full=Hercynylcysteine sulfoxide lyase {ECO:0000305|PubMed:25275953}	PF00266.18^Aminotran_5^Aminotransferase class-V^188-351^E:5e-07	.	.	GO:0016829^molecular_function^lyase activity`GO:0009820^biological_process^alkaloid metabolic process	.
>LE01Gene13760	2.54935	2.76167	2.59545	10.5986	10.7916	10.0009	8.11399	2.61e-18	6.63e-17	>LE01Gene13760	.	.	.	.	.	.
>LE01Gene05924	0	0	0	5.26413	5.90576	5.13283	7.91349	7.39e-09	4.28e-08	>LE01Gene05924	.	PF12796.6^Ank_2^Ankyrin repeats (3 copies)^491-585^E:9.4e-12`PF13637.5^Ank_4^Ankyrin repeats (many copies)^526-576^E:2.2e-07`PF00023.29^Ank^Ankyrin repeat^526-552^E:0.0025`PF13637.5^Ank_4^Ankyrin repeats (many copies)^559-609^E:4.4e-08`PF00023.29^Ank^Ankyrin repeat^559-585^E:0.011`PF12796.6^Ank_2^Ankyrin repeats (3 copies)^561-651^E:3.8e-15`PF13857.5^Ank_5^Ankyrin repeats (many copies)^575-629^E:…	.	.	.	GO:0005515^molecular_function^protein binding
>LE01Gene05721	0	3.12252	0	9.26187	9.61615	7.95342	7.72233	3.34e-20	1.11e-18	>LE01Gene05721	.	.	.	.	.	.
>LE01Gene06364	0	0	0	4.86155	4.90656	4.74539	7.25895	1.17e-07	5.6e-07	>LE01Gene06364	.	.	.	.	.	.
>LE01Gene02635	0	0	0	4.1573	4.81046	5.17469	7.18849	3.5e-07	1.55e-06	>LE01Gene02635	.	.	.	.	.	.
>LE01Gene08165	0	0	0	5.11629	4.47649	4.56829	7.16506	0.00171777	0.00387019	>LE01Gene08165	.	.	.	.	.	.
>LE01Gene06050	0	0	0	4.07958	5.34426	4.36635	7.11755	2.47e-06	9.59e-06	>LE01Gene06050	.	.	.	.	.	.
>LE01Gene13776	6.22451	6.93568	5.62703	13.2537	13.9174	12.3692	6.96875	1.14e-42	5.32e-40	>LE01Gene13776	.	.	.	.	.	.
>LE01Gene10939	0	0	0	4.66272	4.99666	3.50197	6.92259	1.34e-06	5.43e-06	>LE01Gene10939	.	.	.	.	.	.
>LE01Gene08515	0	0	0	5.1547	4.99666	0	6.9225	8.95e-06	3.12e-05	>LE01Gene08515	.	.	.	.	.	.
>LE01Gene04905	0	0	3.81904	8.67258	9.66334	8.19631	6.85191	4.62e-06	1.7e-05	>LE01Gene04905	A2965_ARTBC^A2965_ARTBC^Q:37-1329,H:170-592^42.3%ID^E:5.2e-77^RecName: Full=Putative amidase ARB_02965 {ECO:0000305}	PF01425.20^Amidase^Amidase^10-409^E:8.6e-58	COG0154^Allows the formation of correctly charged Gln-tRNA(Gln) through the transamidation of misacylated Glu-tRNA(Gln) in organisms which lack glutaminyl-tRNA synthetase. The reaction takes place in the presence of glutamine and ATP through an activated gamma-phospho-Glu-tRNA(Gln) (By similarity)	KEGG:abe:ARB_02965`KO:K01426	GO:0005576^cellular_component^extracellular region`GO:0016787^molecular_function^hydrolase activity	.
>LE01Gene10779	0	2.27934	0	7.75634	7.26395	6.31291	6.83662	4.84e-14	6.61e-13	>LE01Gene10779	.	.	.	.	.	.
>LE01Gene01407	3.95987	3.7578	3.5965	9.35139	11.7293	8.02954	6.81716	5.16e-14	7e-13	>LE01Gene01407	LAMA_EMENI^LAMA_EMENI^Q:52-3777,H:7-1238^38.9%ID^E:2.8e-249^RecName: Full=Putative urea carboxylase	PF00289.21^Biotin_carb_N^Biotin carboxylase, N-terminal domain^5-115^E:1.2e-33`PF02786.16^CPSase_L_D2^Carbamoyl-phosphate synthase L chain, ATP binding domain^121-251^E:4.7e-35`PF07478.12^Dala_Dala_lig_C^D-ala D-ala ligase C-terminus^147-234^E:7.2e-05`PF02786.16^CPSase_L_D2^Carbamoyl-phosphate synthase L chain, ATP binding domain^282-346^E:6.3e-14`PF02785.18^Biotin_carb_C^Biotin carboxylase C-ter…	.	KEGG:ani:AN0887.2`KO:K01941	GO:0005524^molecular_function^ATP binding`GO:0016787^molecular_function^hydrolase activity`GO:0046872^molecular_function^metal ion binding`GO:0004847^molecular_function^urea carboxylase activity	GO:0005524^molecular_function^ATP binding`GO:0008716^molecular_function^D-alanine-D-alanine ligase activity
>LE01Gene12430	8.2427	8.44257	8.43881	14.8524	16.2455	12.0873	6.81001	6.49e-23	3.01e-21	>LE01Gene12430	COX2_COPC7^COX2_COPC7^Q:799-2421,H:33-517^35.5%ID^E:1.9e-100^RecName: Full=Cytochrome P450 monooxygenase COX2 {ECO:0000303|PubMed:19400802}	PF00067.21^p450^Cytochrome P450^2-94^E:2.4e-12	COG2124^Cytochrome p450	KEGG:cci:CC1G_03562	GO:0016021^cellular_component^integral component of membrane`GO:0020037^molecular_function^heme binding`GO:0005506^molecular_function^iron ion binding`GO:0004497^molecular_function^monooxygenase activity`GO:0016705^molecular_function^oxidoreductase activity, acting on paired donors, with incorporation or reduction of molecular oxygen	GO:0005506^molecular_function^iron ion binding`GO:0016705^molecular_function^oxidoreductase activity, acting on paired donors, with incorporation or reduction of molecular oxygen`GO:0020037^molecular_function^heme binding`GO:0055114^biological_process^oxidation-reduction process
>LE01Gene09558	0	0	0	3.08506	5.67962	0	6.73834	4.43e-05	0.00013614	>LE01Gene09558	.	.	.	.	.	.
>LE01Gene11334	6.02389	6.32226	6.36998	11.9279	13.1072	13.441	6.72862	1.08e-40	4.28e-38	>LE01Gene11334	.	.	.	.	.	.
>LE01Gene08365	0	0	0	3.37258	3.41473	5.25493	6.69182	5.96e-07	2.54e-06	>LE01Gene08365	.	.	.	.	.	.
>LE01Gene14277	0	0	0	3.99745	4.47649	4.29223	6.66177	4.26e-07	1.86e-06	>LE01Gene14277	.	.	.	.	.	.
>LE01Gene10583	6.82789	6.61952	6.09986	12.8366	13.6496	12.5513	6.55853	1.05e-47	6.8e-45	>LE01Gene10583	PNH1_ORYSJ^PNH1_ORYSJ^Q:456-2972,H:126-971^34.4%ID^E:8.8e-121^RecName: Full=Protein argonaute PNH1	.	.	.	.	.
>LE01Gene13773	6.34999	6.94699	6.16215	13.0903	13.5738	12.1424	6.53833	8.02e-42	3.47e-39	>LE01Gene13773	ARMH4_ARMME^ARMH4_ARMME^Q:174-1736,H:5-529^54.1%ID^E:1.7e-151^RecName: Full=Flavin-dependent halogenase armH4	PF01494.18^FAD_binding_3^FAD binding domain^7-141^E:1.1e-09`PF04820.13^Trp_halogenase^Tryptophan halogenase^9-78^E:2.5e-11`PF13450.5^NAD_binding_8^NAD(P)-binding Rossmann-like domain^12-39^E:3.6e-05`PF04820.13^Trp_halogenase^Tryptophan halogenase^88-343^E:4.3e-14	.	.	GO:0004497^molecular_function^monooxygenase activity	GO:0071949^molecular_function^FAD binding
>LE01Gene12580	0	0	0	3.37258	4.59661	3.95055	6.44033	4.65e-05	0.000142591	>LE01Gene12580	.	.	.	.	.	.
>LE01Gene12328	9.38767	8.92681	9.07595	14.851	16.1822	15.2532	6.39973	1.76e-31	2.75e-29	>LE01Gene12328	NIT_TALMQ^NIT_TALMQ^Q:625-1503,H:15-310^47.5%ID^E:7.6e-77^RecName: Full=Nitrilase {ECO:0000303|PubMed:21892598, ECO:0000303|PubMed:23475593}	PF00795.21^CN_hydrolase^Carbon-nitrogen hydrolase^2-206^E:1.8e-24	COG0388^nitrilase cyanide hydratase and apolipoprotein n-acyltransferase	.	GO:0000257^molecular_function^nitrilase activity`GO:0006807^biological_process^nitrogen compound metabolic process	GO:0006807^biological_process^nitrogen compound metabolic process
>LE01Gene07525	7.41683	7.83554	6.4387	13.6901	14.3303	12.7504	6.39661	5.25e-33	9.45e-31	>LE01Gene07525	EASB_EMENI^EASB_EMENI^Q:89-2464,H:50-882^29.5%ID^E:4.4e-81^RecName: Full=Highly reducing polyketide synthase easB {ECO:0000303|PubMed:18559263}	PF00109.25^ketoacyl-synt^Beta-ketoacyl synthase, N-terminal domain^4-233^E:1.7e-47`PF02801.21^Ketoacyl-synt_C^Beta-ketoacyl synthase, C-terminal domain^238-351^E:1.9e-26`PF16197.4^KAsynt_C_assoc^Ketoacyl-synthetase C-terminal extension^355-470^E:3.3e-10`PF00698.20^Acyl_transf_1^Acyl transferase domain^495-797^E:1.2e-33`PF14765.5^PS-DH^Polyketide synthase dehydratase^868-1127^E:1.6e-25`PF08659.9^K…	.	KEGG:fox:FOXG_15248	GO:0016491^molecular_function^oxidoreductase activity`GO:0031177^molecular_function^phosphopantetheine binding`GO:0016746^molecular_function^transferase activity, transferring acyl groups	.
>LE01Gene07069	2.28775	2.27934	0	6.94931	8.08536	7.85387	6.32177	2.23e-13	2.69e-12	>LE01Gene07069	.	.	.	.	.	.
>LE01Gene13789	4.54393	5.19592	3.81904	11.7184	10.4546	9.55446	6.27857	1.45e-12	1.53e-11	>LE01Gene13789	XGEA_ASPNC^XGEA_ASPNC^Q:92-817,H:4-240^44.7%ID^E:1.6e-47^RecName: Full=Probable xyloglucan-specific endo-beta-1,4-glucanase A	PF01670.15^Glyco_hydro_12^Glycosyl hydrolase family 12^64-273^E:3.2e-38	.	KEGG:ang:ANI_1_432014`KO:K18576	GO:0005576^cellular_component^extracellular region`GO:0008810^molecular_function^cellulase activity`GO:0033946^molecular_function^xyloglucan-specific endo-beta-1,4-glucanase activity`GO:0071555^biological_process^cell wall organization`GO:0000272^biological_process^polysaccharide catabolic process	GO:0008810^molecular_function^cellulase activity`GO:0000272^biological_process^polysaccharide catabolic process
>LE01Gene10357	2.54935	0	0	6.85916	7.45088	6.48914	6.27158	1.11e-14	1.68e-13	>LE01Gene10357	ALDH_AGABI^ALDH_AGABI^Q:160-666,H:83-277^49.2%ID^E:2.7e-42^RecName: Full=Aldehyde dehydrogenase	PF00171.21^Aldedh^Aldehyde dehydrogenase family^58-151^E:2.4e-28	.	.	GO:0004029^molecular_function^aldehyde dehydrogenase (NAD) activity`GO:0043878^molecular_function^glyceraldehyde-3-phosphate dehydrogenase (NAD+) (non-phosphorylating) activity`GO:0006068^biological_process^ethanol catabolic process	GO:0016491^molecular_function^oxidoreductase activity`GO:0055114^biological_process^oxidation-reduction process
>LE01Gene06695	3.66094	2.95335	4.87013	9.12833	10.7082	10.3596	6.24919	3.52e-12	3.45e-11	>LE01Gene06695	PATI_ASPCL^PATI_ASPCL^Q:58-888,H:5-285^28.7%ID^E:4.8e-24^RecName: Full=Cytochrome P450 monooxygenase patI {ECO:0000303|PubMed:19383676}	.	.	.	.	.
>LE01Gene02145	0	0	0	4.43203	3.27768	3.50197	6.19456	0.000267037	0.000706695	>LE01Gene02145	.	.	.	.	.	.
>LE01Gene05715	5.24367	4.19735	2.81814	10.3389	11.0704	9.67055	6.14108	4.29e-11	3.55e-10	>LE01Gene05715	COX2_COPC7^COX2_COPC7^Q:165-1280,H:38-407^33.9%ID^E:4.8e-52^RecName: Full=Cytochrome P450 monooxygenase COX2 {ECO:0000303|PubMed:19400802}	PF00067.21^p450^Cytochrome P450^6-84^E:1.6e-18	COG2124^Cytochrome p450	KEGG:dme:Dmel_CG7241	GO:0005789^cellular_component^endoplasmic reticulum membrane`GO:0031090^cellular_component^organelle membrane`GO:0020037^molecular_function^heme binding`GO:0005506^molecular_function^iron ion binding`GO:0004497^molecular_function^monooxygenase activity`GO:0016705^molecular_function^oxidoreductase activity, acting on paired donors, with incorporation or reduction of molecular oxygen	GO:0005506^molecular_function^iron ion binding`GO:0016705^molecular_function^oxidoreductase activity, acting on paired donors, with incorporation or reduction of molecular oxygen`GO:0020037^molecular_function^heme binding`GO:0055114^biological_process^oxidation-reduction process
>LE01Gene14276	0	0	0	4.07958	4.5378	0	6.14047	0.00104203	0.00246048	>LE01Gene14276	HETE1_PODAS^HETE1_PODAS^Q:249-1274,H:277-632^23.2%ID^E:1.6e-11^RecName: Full=Vegetative incompatibility protein HET-E-1	PF13401.5^AAA_22^AAA domain^69-207^E:2.5e-07`PF05729.11^NACHT^NACHT domain^74-197^E:8e-07`PF12796.6^Ank_2^Ankyrin repeats (3 copies)^494-556^E:1.8e-09`PF13637.5^Ank_4^Ankyrin repeats (many copies)^497-547^E:2e-07`PF00023.29^Ank^Ankyrin repeat^497-523^E:0.029`PF12796.6^Ank_2^Ankyrin repeats (3 copies)^499-589^E:4.9e-15`PF13637.5^Ank_4^Ankyrin repeats (many copies)^531-573^E:5.4e-06`PF13637.5^Ank_4…	.	.	.	GO:0005515^molecular_function^protein binding
>LE01Gene07526	6.58695	7.03443	6.4387	12.2468	12.9761	13.0102	6.08838	9.14e-54	9.71e-51	>LE01Gene07526	.	.	.	.	.	.
>LE01Gene06048	0	0	0	2.50555	3.76168	4.21409	6.00048	8.4e-06	2.94e-05	>LE01Gene06048	.	.	.	.	.	.
>LE01Gene09111	2.54935	0	0	6.67326	7.60921	4.13148	5.99943	1.18e-06	4.78e-06	>LE01Gene09111	.	.	.	.	.	.
>LE01Gene13775	7.29727	7.45466	6.95499	13.2808	13.8787	11.5771	5.95062	4.34e-44	2.21e-41	>LE01Gene13775	APDF_EMENI^APDF_EMENI^Q:375-1676,H:9-418^36.2%ID^E:5.9e-64^RecName: Full=Aspyridones efflux protein apdF {ECO:0000303|PubMed:17369821}	.	.	.	.	.
>LE01Gene11067	1.96799	2.27934	0	7.1622	7.67209	6.25556	5.94618	7.17e-12	6.71e-11	>LE01Gene11067	.	PF11807.7^DUF3328^Domain of unknown function (DUF3328)^46-172^E:4.6e-12	.	.	.	GO:0043386^biological_process^mycotoxin biosynthetic process
>LE01Gene11947	0	3.65118	0	7.36416	8.37716	7.76075	5.93806	1.59e-05	5.28e-05	>LE01Gene11947	.	.	.	.	.	.
>LE01Gene06137	0	0	0	4.1573	4.04116	0	5.90184	0.00140199	0.00321955	>LE01Gene06137	TIGD1_HUMAN^TIGD1_HUMAN^Q:786-1580,H:83-352^23%ID^E:4.6e-07^RecName: Full=Tigger transposable element-derived protein 1	PF03221.15^HTH_Tnp_Tc5^Tc5 transposase DNA-binding domain^37-91^E:0.00012`PF03184.18^DDE_1^DDE superfamily endonuclease^168-298^E:1.9e-21	.	.	.	GO:0003676^molecular_function^nucleic acid binding
>LE01Gene05711	4.81663	4.34147	4.91905	10.4366	10.9288	10.2141	5.90025	1.39e-20	4.79e-19	>LE01Gene05711	PRO1_ARMGA^PRO1_ARMGA^Q:163-1137,H:5-330^52.8%ID^E:6.4e-99^RecName: Full=Delta(6)-protoilludene synthase	.	.	.	GO:0000287^molecular_function^magnesium ion binding`GO:0010333^molecular_function^terpene synthase activity`GO:0016114^biological_process^terpenoid biosynthetic process	.
>LE01Gene05742	3.1319	3.12252	0	8.02864	9.12826	6.45557	5.86367	4.65e-14	6.37e-13	>LE01Gene05742	BLML3_DICDI^BLML3_DICDI^Q:269-1357,H:19-368^26.7%ID^E:1.5e-15^RecName: Full=Beta-lactamase-like protein 3	PF00144.23^Beta-lactamase^Beta-lactamase^96-441^E:4.9e-36	.	.	.	.
>LE01Gene13761	0	2.27934	3.5965	7.71839	8.73223	7.8147	5.85354	9.25e-18	2.15e-16	>LE01Gene13761	PAXQ_PENPX^PAXQ_PENPX^Q:79-1575,H:16-507^30.8%ID^E:1.1e-58^RecName: Full=Cytochrome P450 monooxygenase paxQ {ECO:0000303|PubMed:12884010}	.	.	.	.	.
>LE01Gene11192	0	0	0	4.49325	2.957	1.61628	5.81275	0.000828685	0.00199895	>LE01Gene11192	.	.	.	.	.	.
>LE01Gene07530	0	0	0	3.08506	3.76168	3.50197	5.80995	0.000107343	0.000305788	>LE01Gene07530	.	.	.	.	.	.
>LE01Gene04911	6.36706	7.54676	6.69896	12.368	13.3262	12.3376	5.80617	1.3e-31	2.07e-29	>LE01Gene04911	.	.	.	.	.	.
>LE01Gene03815	0	0	0	3.91034	3.53988	2.35943	5.7377	0.000102914	0.000294605	>LE01Gene03815	.	.	.	.	.	.
>LE01Gene03625	0	0	0	2.9165	3.86098	3.21153	5.71054	0.0024863	0.00539784	>LE01Gene03625	.	.	.	.	.	.
>LE01Gene10786	5.65843	3.65118	4.767	10.3368	11.3204	9.49374	5.70969	9.22e-29	1.01e-26	>LE01Gene10786	.	.	.	.	.	.
>LE01Gene05719	6.86441	7.19485	4.5356	12.2551	12.9743	10.7721	5.69554	2.22e-14	3.21e-13	>LE01Gene05719	.	PF09448.9^MmlI^Methylmuconolactone methyl-isomerase^3-99^E:1.6e-08`PF07110.10^EthD^EthD domain^13-106^E:6.7e-16	.	.	.	.
>LE01Gene13774	7.34973	8.02891	7.86427	13.4362	14.0035	12.4847	5.66666	5.57e-38	1.63e-35	>LE01Gene13774	OMT2_PHACR^OMT2_PHACR^Q:814-1503,H:213-446^37.4%ID^E:1.8e-40^RecName: Full=3-O-methyltransferase 2 {ECO:0000303|PubMed:26672450}	.	.	.	GO:0008171^molecular_function^O-methyltransferase activity`GO:0046274^biological_process^lignin catabolic process	.
>LE01Gene10673	0	0	0	2.50555	0	4.56829	5.65856	0.00383	0.00796453	>LE01Gene10673	.	.	.	.	.	.
>LE01Gene12743	3.1319	5.30544	3.81904	8.39629	10.2569	10.4938	5.65678	1.75e-08	9.56e-08	>LE01Gene12743	AFLU_ASPPU^AFLU_ASPPU^Q:52-1458,H:21-461^31.4%ID^E:2.3e-61^RecName: Full=Cytodhrome P450 monooxygenase aflU {ECO:0000303|PubMed:15006741}	PF00067.21^p450^Cytochrome P450^56-445^E:1e-51	.	.	GO:0016021^cellular_component^integral component of membrane`GO:0020037^molecular_function^heme binding`GO:0005506^molecular_function^iron ion binding`GO:0004497^molecular_function^monooxygenase activity`GO:0016705^molecular_function^oxidoreductase activity, acting on paired donors, with incorporation or reduction of molecular oxygen	GO:0005506^molecular_function^iron ion binding`GO:0016705^molecular_function^oxidoreductase activity, acting on paired donors, with incorporation or reduction of molecular oxygen`GO:0020037^molecular_function^heme binding`GO:0055114^biological_process^oxidation-reduction process
>LE01Gene01188	7.99074	7.63333	7.87671	13.9055	13.798	12.2647	5.65478	1.07e-34	2.23e-32	>LE01Gene01188	.	.	.	.	.	.
>LE01Gene12929	6.36706	7.54676	6.69896	12.3157	13.2878	11.7134	5.63843	3.43e-26	2.5e-24	>LE01Gene12929	.	.	.	.	.	.
>LE01Gene07992	5.00287	5.43962	5.29766	9.21038	12.179	8.09094	5.62026	2.42e-11	2.07e-10	>LE01Gene07992	PAC2_SCHPO^PAC2_SCHPO^Q:309-833,H:8-193^35.1%ID^E:1.2e-15^RecName: Full=cAMP-independent regulatory protein pac2	PF09729.8^Gti1_Pac2^Gti1/Pac2 family^10-96^E:4.5e-26	.	.	.	.
>LE01Gene09093	3.1319	6.01346	5.14151	9.71966	10.5282	11.4766	5.61158	1.33e-06	5.39e-06	>LE01Gene09093	.	.	.	.	.	.
>LE01Gene11967	6.69903	7.1661	6.62716	11.8032	12.8678	12.3788	5.575	1.92e-38	5.9e-36	>LE01Gene11967	.	.	.	.	.	.
>LE01Gene05355	7.09701	7.7017	8.18246	11.9713	13.9548	13.2803	5.55998	1.6e-27	1.47e-25	>LE01Gene05355	COX2_COPC7^COX2_COPC7^Q:322-1476,H:118-508^25.8%ID^E:9.5e-28^RecName: Full=Cytochrome P450 monooxygenase COX2 {ECO:0000303|PubMed:19400802}	.	.	.	.	.
>LE01Gene05712	6.38392	6.15675	5.29766	11.4573	12.0845	10.655	5.51799	1.37e-27	1.29e-25	>LE01Gene05712	PUR8_STRAD^PUR8_STRAD^Q:197-1339,H:47-421^27.9%ID^E:1.2e-28^RecName: Full=Puromycin resistance protein pur8	PF07690.15^MFS_1^Major Facilitator Superfamily^35-429^E:7.7e-28	.	KEGG:sce:YOR378W	GO:0016021^cellular_component^integral component of membrane`GO:0005886^cellular_component^plasma membrane`GO:0008519^molecular_function^ammonium transmembrane transporter activity`GO:0015696^biological_process^ammonium transport	GO:0055085^biological_process^transmembrane transport`GO:0016021^cellular_component^integral component of membrane
>LE01Gene06694	0	0	0	0	4.04116	3.36405	5.51305	0.000611251	0.00151145	>LE01Gene06694	YANC_ASPNA^YANC_ASPNA^Q:82-273,H:461-526^38.8%ID^E:3.1e-06^RecName: Full=Cytochrome P450 monooxygenase yanC {ECO:0000303|PubMed:24684908}	.	.	.	.	.
>LE01Gene01001	11.3371	11.5873	11.5508	15.25	16.1487	18.0965	5.49981	7.81e-07	3.28e-06	>LE01Gene01001	ASL1_SCHPO^ASL1_SCHPO^Q:820-1554,H:295-527^31.4%ID^E:3.5e-18^RecName: Full=Alkali-sensitive linkage protein 1	PF11790.7^Glyco_hydro_cc^Glycosyl hydrolase catalytic core^25-238^E:2.7e-32	.	.	.	.
>LE01Gene12927	5.28017	5.03563	5.96657	10.3168	11.1844	11.0197	5.43525	4.03e-06	1.5e-05	>LE01Gene12927	.	.	.	.	.	.
>LE01Gene00604	6.14757	5.67551	7.03485	11.0367	12.6225	11.1715	5.42072	2.01e-20	6.81e-19	>LE01Gene00604	AIM2_YEAST^AIM2_YEAST^Q:390-1154,H:7-243^32.7%ID^E:5.6e-35^RecName: Full=Protein AIM2	PF01738.17^DLH^Dienelactone hydrolase family^53-245^E:2.6e-18	.	.	.	GO:0016787^molecular_function^hydrolase activity
>LE01Gene11948	3.86694	5.50231	2.59545	9.65415	10.4406	8.95652	5.41526	1.97e-09	1.25e-08	>LE01Gene11948	OMT1_PHACR^OMT1_PHACR^Q:30-1439,H:1-469^49.5%ID^E:1.4e-128^RecName: Full=4-O-methyltransferase 1 {ECO:0000303|PubMed:26672450}	PF00891.17^Methyltransf_2^O-methyltransferase^221-399^E:9.5e-21	.	.	GO:0008171^molecular_function^O-methyltransferase activity`GO:0046274^biological_process^lignin catabolic process	GO:0008171^molecular_function^O-methyltransferase activity
>LE01Gene11737	7.40861	7.74122	7.38754	12.4785	13.7461	11.5693	5.35764	6.08e-14	8.14e-13	>LE01Gene11737	ADY2_YEAST^ADY2_YEAST^Q:1921-2481,H:83-254^44.4%ID^E:7.1e-34^RecName: Full=Accumulation of dyads protein 2	PF01184.18^Grp1_Fun34_YaaH^GPR1/FUN34/yaaH family^524-721^E:1.2e-60	.	KEGG:sce:YCR010C`KO:K07034	GO:0016021^cellular_component^integral component of membrane`GO:0005886^cellular_component^plasma membrane`GO:0005774^cellular_component^vacuolar membrane`GO:0015123^molecular_function^acetate transmembrane transporter activity`GO:0008519^molecular_function^ammonium transmembrane transporter activity`GO:0006846^biological_process^acetate transport`GO:0015696^biological_process^ammonium transport`…	GO:0016021^cellular_component^integral component of membrane
>LE01Gene01606	4.35154	4.75586	4.4043	9.89862	10.4635	8.35036	5.35718	2.55e-29	2.92e-27	>LE01Gene01606	RUTB_AGRRK^RUTB_AGRRK^Q:187-960,H:16-244^24.9%ID^E:1.5e-07^RecName: Full=Peroxyureidoacrylate/ureidoacrylate amidohydrolase RutB {ECO:0000255|HAMAP-Rule:MF_00830}	PF00857.19^Isochorismatase^Isochorismatase family^83-290^E:1.6e-23	.	.	.	GO:0003824^molecular_function^catalytic activity
>LE01Gene12351	0	4.11951	0	7.62573	8.41033	7.13385	5.3568	1.56e-11	1.39e-10	>LE01Gene12351	.	.	.	.	.	.
>LE01Gene04912	7.73214	8.54289	7.17236	12.681	14.0424	12.5525	5.33992	6.9e-35	1.52e-32	>LE01Gene04912	LAAA_PSEFS^LAAA_PSEFS^Q:252-1097,H:17-296^39.2%ID^E:2.9e-56^RecName: Full=L-amino acid amidase {ECO:0000250|UniProtKB:Q76KX0}	PF00561.19^Abhydrolase_1^alpha/beta hydrolase fold^33-287^E:7.9e-15`PF12697.6^Abhydrolase_6^Alpha/beta hydrolase family^34-291^E:4.6e-11`PF12146.7^Hydrolase_4^Serine aminopeptidase, S33^35-208^E:4e-07	COG0596^Alpha beta hydrolase	KEGG:lcr:LCRIS_00081`KO:K01259	GO:0031975^cellular_component^envelope`GO:0004177^molecular_function^aminopeptidase activity	.
>LE01Gene13770	6.36706	7.17574	5.68476	11.679	12.5116	10.8549	5.31411	2.88e-25	1.86e-23	>LE01Gene13770	NPS10_HETAN^NPS10_HETAN^Q:47-1726,H:9-570^32.9%ID^E:2.4e-79^RecName: Full=Adenylate-forming reductase Nps10	PF00501.27^AMP-binding^AMP-binding enzyme^51-378^E:4.1e-17	.	.	GO:0016491^molecular_function^oxidoreductase activity`GO:0031177^molecular_function^phosphopantetheine binding`GO:0016740^molecular_function^transferase activity	GO:0003824^molecular_function^catalytic activity
>LE01Gene06693	4.04717	3.41093	0	7.612	9.25004	7.63145	5.30683	1.19e-13	1.5e-12	>LE01Gene06693	LOLE1_EPIUN^LOLE1_EPIUN^Q:61-480,H:22-156^29.4%ID^E:5e-12^RecName: Full=Dioxygenase lolE1 {ECO:0000303|PubMed:15654104}	PF05721.12^PhyH^Phytanoyl-CoA dioxygenase (PhyH)^16-53^E:7.6e-08	.	.	.	.
>LE01Gene06829	0	3.12252	0	6.88223	7.30861	4.90312	5.28414	1.14e-11	1.03e-10	>LE01Gene06829	.	PF12796.6^Ank_2^Ankyrin repeats (3 copies)^581-669^E:7.3e-12`PF13637.5^Ank_4^Ankyrin repeats (many copies)^609-660^E:1e-07`PF13637.5^Ank_4^Ankyrin repeats (many copies)^643-693^E:1.5e-07`PF12796.6^Ank_2^Ankyrin repeats (3 copies)^675-735^E:6.8e-09`PF13637.5^Ank_4^Ankyrin repeats (many copies)^676-726^E:2.3e-08`PF13606.5^Ank_3^Ankyrin repeat^676-701^E:0.0018`PF00023.29^Ank^Ankyrin repeat^676-702^E…	.	.	.	GO:0005515^molecular_function^protein binding
>LE01Gene05717	7.45724	7.68153	6.07848	12.5034	12.8724	11.9622	5.27782	1.28e-24	7.61e-23	>LE01Gene05717	.	.	.	.	.	.
>LE01Gene05714	2.28775	3.27392	4.4043	9.10401	9.20586	6.97709	5.27303	1e-07	4.84e-07	>LE01Gene05714	.	.	.	.	.	.
>LE01Gene11854	10.7336	11.9473	11.5933	15.2645	16.0422	17.7415	5.22128	7.58e-07	3.19e-06	>LE01Gene11854	.	.	.	.	.	.
>LE01Gene04910	3.1319	2.54057	2.81814	7.81147	8.27284	7.32255	5.21286	2.17e-18	5.56e-17	>LE01Gene04910	.	.	.	.	.	.
>LE01Gene05743	4.81663	4.90251	4.25985	9.74505	10.3771	8.97737	5.17724	7.12e-35	1.54e-32	>LE01Gene05743	YJCD_SCHPO^YJCD_SCHPO^Q:55-921,H:31-324^38.5%ID^E:1.5e-37^RecName: Full=Uncharacterized oxidoreductase C736.13	PF00106.24^adh_short^short chain dehydrogenase^32-175^E:1.1e-21`PF01370.20^Epimerase^NAD dependent epimerase/dehydratase family^33-231^E:5.5e-05`PF08659.9^KR^KR domain^34-142^E:3.9e-05`PF13561.5^adh_short_C2^Enoyl-(Acyl carrier protein) reductase^40-176^E:1.8e-11	COG1028^Dehydrogenase reductase`COG5021^ubiquitin protein ligase	KEGG:mmu:80707`KO:K19329	GO:0005737^cellular_component^cytoplasm`GO:0005829^cellular_component^cytosol`GO:0005794^cellular_component^Golgi apparatus`GO:0005902^cellular_component^microvillus`GO:0005739^cellular_component^mitochondrion`GO:0005634^cellular_component^nucleus`GO:0005886^cellular_component^plasma membrane`GO:0090575^cellular_component^RNA polymerase II transcription factor complex`GO:0019899^molecular_functio…	GO:0003824^molecular_function^catalytic activity`GO:0050662^molecular_function^coenzyme binding
>LE01Gene10788	7.1669	7.61925	7.32538	12.2373	13.2692	11.6678	5.17262	1.01e-38	3.19e-36	>LE01Gene10788	CHG5_CHAGB^CHG5_CHAGB^Q:740-2227,H:63-560^32.3%ID^E:1.5e-65^RecName: Full=FAD-linked oxidoreductase CHGG_01242-2 {ECO:0000303|PubMed:23611317}	.	.	.	.	.
>LE01Gene14775	6.71244	6.85391	6.29782	11.7172	12.395	10.9171	5.17233	3.77e-28	3.9e-26	>LE01Gene14775	LAAA_PSEFS^LAAA_PSEFS^Q:367-1152,H:17-297^33.7%ID^E:1.5e-42^RecName: Full=L-amino acid amidase {ECO:0000250|UniProtKB:Q76KX0}	PF12697.6^Abhydrolase_6^Alpha/beta hydrolase family^65-271^E:5.2e-09`PF12146.7^Hydrolase_4^Serine aminopeptidase, S33^94-180^E:9.6e-07	.	KEGG:pfs:PFLU_1629`KO:K18457	GO:0008233^molecular_function^peptidase activity	.
>LE01Gene06508	5.38443	4.80642	3.47087	8.87591	9.68721	10.5255	5.1502	6.38e-06	2.28e-05	>LE01Gene06508	ACTS2_ALTAL^ACTS2_ALTAL^Q:170-1204,H:5-342^32.5%ID^E:9.3e-41^RecName: Full=Trans-enoyl reductase ACTTS2 {ECO:0000303|PubMed:20055645}	PF08240.11^ADH_N^Alcohol dehydrogenase GroES-like domain^24-109^E:7.8e-07`PF00107.25^ADH_zinc_N^Zinc-binding dehydrogenase^165-242^E:4.3e-17	.	.	GO:0000166^molecular_function^nucleotide binding`GO:0016491^molecular_function^oxidoreductase activity	GO:0055114^biological_process^oxidation-reduction process
>LE01Gene07847	0	4.27121	0	7.50459	8.47445	6.81449	5.13455	8.53e-12	7.89e-11	>LE01Gene07847	.	.	.	.	.	.
>LE01Gene06702	6.97986	7.52428	7.06777	11.7059	13.1941	11.2166	5.09493	2.29e-29	2.66e-27	>LE01Gene06702	NPS10_HETAN^NPS10_HETAN^Q:62-1663,H:14-570^28.8%ID^E:4.2e-57^RecName: Full=Adenylate-forming reductase Nps10	PF00501.27^AMP-binding^AMP-binding enzyme^25-336^E:1.8e-26	.	.	.	GO:0003824^molecular_function^catalytic activity
>LE01Gene04838	3.28342	3.7578	4.33388	8.80524	9.18206	8.43029	5.08507	2.7e-19	7.93e-18	>LE01Gene04838	.	.	.	.	.	.
>LE01Gene05935	5.84053	6.33953	5.50415	10.5463	11.0884	11.2604	5.08261	6.83e-09	3.99e-08	>LE01Gene05935	AFT11_ALTAL^AFT11_ALTAL^Q:208-1794,H:36-561^28.3%ID^E:1.8e-39^RecName: Full=Acyl-CoA ligase AFT1-1 {ECO:0000303|PubMed:12019223}	PF00501.27^AMP-binding^AMP-binding enzyme^33-449^E:6.1e-61	COG0318^Amp-dependent synthetase and ligase	KEGG:bsu:BSU10270`KO:K01897	GO:0005524^molecular_function^ATP binding`GO:0102391^molecular_function^decanoate-CoA ligase activity`GO:0004467^molecular_function^long-chain fatty acid-CoA ligase activity`GO:0006635^biological_process^fatty acid beta-oxidation	GO:0003824^molecular_function^catalytic activity
>LE01Gene11065	3.66094	5.67551	5.05659	9.03105	10.2591	10.3865	5.03528	2.26e-17	4.91e-16	>LE01Gene11065	.	.	.	.	.	.
>LE01Gene05209	8.90561	9.25271	8.78734	12.9793	14.3716	14.3423	5.03294	2.48e-54	3.63e-51	>LE01Gene05209	DUG3_YEAST^DUG3_YEAST^Q:635-1234,H:1-164^28%ID^E:1.2e-15^RecName: Full=Probable glutamine amidotransferase DUG3	PF13522.5^GATase_6^Glutamine amidotransferase domain^98-168^E:4e-07	.	.	.	.
>LE01Gene00045	0	0	0	2.9165	2.76525	2.624	5.01728	0.000925694	0.00220683	>LE01Gene00045	.	.	.	.	.	.
>LE01Gene02461	9.20515	9.25953	9.18998	13.856	14.7882	13.8062	5.00879	7.25e-25	4.41e-23	>LE01Gene02461	N6235_COPC7^N6235_COPC7^Q:565-1812,H:613-1025^28.5%ID^E:1.7e-42^RecName: Full=Adenylate-forming reductase 06235	.	.	.	.	.
>LE01Gene07086	5.91205	6.09708	6.65631	11.2656	11.7444	10.4476	5.00772	2.34e-17	5.05e-16	>LE01Gene07086	MNS1B_ASPPH^MNS1B_ASPPH^Q:190-1533,H:45-504^39.4%ID^E:1e-84^RecName: Full=Mannosyl-oligosaccharide alpha-1,2-mannosidase 1B	PF01532.19^Glyco_hydro_47^Glycosyl hydrolase family 47^47-494^E:4.7e-119	.	.	GO:0060205^cellular_component^cytoplasmic vesicle lumen`GO:0016020^cellular_component^membrane`GO:0005509^molecular_function^calcium ion binding`GO:0004571^molecular_function^mannosyl-oligosaccharide 1,2-alpha-mannosidase activity`GO:0005975^biological_process^carbohydrate metabolic process`GO:0006486^biological_process^protein glycosylation	GO:0004571^molecular_function^mannosyl-oligosaccharide 1,2-alpha-mannosidase activity`GO:0005509^molecular_function^calcium ion binding`GO:0016020^cellular_component^membrane
>LE01Gene00974	7.58673	9.33681	9.18998	11.7719	14.6552	13.9346	4.98456	2.35e-10	1.73e-09	>LE01Gene00974	.	.	.	.	.	.
>LE01Gene05716	5.6859	5.83013	5.33419	10.2352	10.9323	10.4896	4.97795	1.57e-37	4.27e-35	>LE01Gene05716	FUM15_GIBM7^FUM15_GIBM7^Q:72-1442,H:63-566^26.4%ID^E:9.2e-34^RecName: Full=Cytochrome P450 monooxygenase FUM15 {ECO:0000303|PubMed:12620260}	PF00067.21^p450^Cytochrome P450^35-477^E:3.9e-62`PF00067.21^p450^Cytochrome P450^485-673^E:1.7e-32	COG2124^Cytochrome p450	KEGG:ath:AT3G14660	GO:0016021^cellular_component^integral component of membrane`GO:0020037^molecular_function^heme binding`GO:0005506^molecular_function^iron ion binding`GO:0004497^molecular_function^monooxygenase activity`GO:0016705^molecular_function^oxidoreductase activity, acting on paired donors, with incorporation or reduction of molecular oxygen	GO:0005506^molecular_function^iron ion binding`GO:0016705^molecular_function^oxidoreductase activity, acting on paired donors, with incorporation or reduction of molecular oxygen`GO:0020037^molecular_function^heme binding`GO:0055114^biological_process^oxidation-reduction process
>LE01Gene11068	6.29754	5.83013	5.98966	11.014	11.2005	10.7806	4.97737	2.03e-23	1.01e-21	>LE01Gene11068	.	.	.	.	.	.
>LE01Gene08193	4.86549	5.37409	3.01101	6.92729	10.2046	10.0339	4.9542	9.15e-05	0.000264314	>LE01Gene08193	COP6_COPC7^COP6_COPC7^Q:164-1018,H:14-299^38%ID^E:4e-52^RecName: Full=Alpha-cuprenene synthase COP6 {ECO:0000303|PubMed:19400802}	PF06330.10^TRI5^Trichodiene synthase (TRI5)^75-304^E:6e-24	ENOG410YEIS^Trichodiene synthase (TRI5)	KEGG:cci:CC1G_03563`KO:K22060	GO:0046872^molecular_function^metal ion binding`GO:0045482^molecular_function^trichodiene synthase activity`GO:0016106^biological_process^sesquiterpenoid biosynthetic process	GO:0016838^molecular_function^carbon-oxygen lyase activity, acting on phosphates
>LE01Gene10787	6.1672	5.03563	5.76724	10.5051	11.0807	10.2128	4.94344	1.9e-37	5.05e-35	>LE01Gene10787	.	.	.	.	.	.
>LE01Gene09109	4.48261	6.03483	6.01238	10.1002	11.4948	9.26339	4.94254	2.67e-19	7.88e-18	>LE01Gene09109	.	.	.	.	.	.
>LE01Gene12943	6.63001	5.62005	6.83265	11.5453	11.5733	10.8669	4.9303	5.96e-26	4.15e-24	>LE01Gene12943	.	.	.	.	.	.
>LE01Gene05710	6.55752	7.41448	6.24123	11.5294	12.1359	11.4261	4.9183	8.95e-17	1.8e-15	>LE01Gene05710	PSIH_PSICU^PSIH_PSICU^Q:39-1535,H:4-497^35.2%ID^E:1.9e-91^RecName: Full=Tryptamine 4-monooxygenase	PF00067.21^p450^Cytochrome P450^1-95^E:2.1e-20	.	KEGG:ag:ASU62246`KO:K22434	GO:0020037^molecular_function^heme binding`GO:0005506^molecular_function^iron ion binding`GO:0004497^molecular_function^monooxygenase activity`GO:0016705^molecular_function^oxidoreductase activity, acting on paired donors, with incorporation or reduction of molecular oxygen	GO:0005506^molecular_function^iron ion binding`GO:0016705^molecular_function^oxidoreductase activity, acting on paired donors, with incorporation or reduction of molecular oxygen`GO:0020037^molecular_function^heme binding`GO:0055114^biological_process^oxidation-reduction process
>LE01Gene04819	9.08909	9.31078	10.2652	14.5771	14.7538	14.2513	4.89391	1.81e-33	3.47e-31	>LE01Gene04819	ISP4_SCHPO^ISP4_SCHPO^Q:163-2451,H:38-785^43.5%ID^E:3.6e-189^RecName: Full=Sexual differentiation process protein isp4	PF03169.14^OPT^OPT oligopeptide transporter protein^74-720^E:5e-192	.	KEGG:spo:SPBC29B5.02c	GO:0005783^cellular_component^endoplasmic reticulum`GO:0005789^cellular_component^endoplasmic reticulum membrane`GO:0005794^cellular_component^Golgi apparatus`GO:0005887^cellular_component^integral component of plasma membrane`GO:0005886^cellular_component^plasma membrane`GO:1901584^molecular_function^tetrapeptide transmembrane transporter activity`GO:0015031^biological_process^protein transport`…	GO:0055085^biological_process^transmembrane transport
>LE01Gene06045	2.54935	2.27934	4.09931	6.44439	8.95928	7.14442	4.86869	2.66e-11	2.28e-10	>LE01Gene06045	.	.	.	.	.	.
>LE01Gene12816	10.8035	11.3058	11.7808	16.3472	15.8583	16.3808	4.86375	4.25e-23	2.04e-21	>LE01Gene12816	PRTA_ASPNG^PRTA_ASPNG^Q:1586-2365,H:1-281^40.1%ID^E:4.8e-43^RecName: Full=Aspergillopepsin-2	.	.	.	.	.
>LE01Gene09742	0	0	0	0	4.04116	0	4.84028	0.00178568	0.00400699	>LE01Gene09742	.	.	.	.	.	.
>LE01Gene14285	5.08768	6.13713	5.01219	10.5669	10.6573	9.4518	4.83934	7.19e-30	9.13e-28	>LE01Gene14285	.	.	.	.	.	.
>LE01Gene13772	9.5478	9.54096	8.88292	14.3821	14.6888	12.95	4.82619	1.33e-25	8.85e-24	>LE01Gene13772	.	PF12697.6^Abhydrolase_6^Alpha/beta hydrolase family^39-343^E:1.1e-06	.	.	.	.
>LE01Gene05665	7.95732	8.10662	7.17236	12.2468	13.4991	11.185	4.81736	4.9e-21	1.78e-19	>LE01Gene05665	.	.	.	.	.	.
>LE01Gene07621	9.76777	10.0591	9.7824	15.0507	15.3749	11.4871	4.81549	4.3e-08	2.2e-07	>LE01Gene07621	GOX_ASPNG^GOX_ASPNG^Q:307-2097,H:26-603^30.3%ID^E:1.4e-43^RecName: Full=Glucose oxidase	PF00732.18^GMC_oxred_N^GMC oxidoreductase^38-357^E:6.7e-45`PF05199.12^GMC_oxred_C^GMC oxidoreductase^466-607^E:5.5e-24	.	KEGG:ani:AN7998.2	GO:0050660^molecular_function^flavin adenine dinucleotide binding`GO:0016614^molecular_function^oxidoreductase activity, acting on CH-OH group of donors`GO:1900793^biological_process^shamixanthone biosynthetic process	GO:0016614^molecular_function^oxidoreductase activity, acting on CH-OH group of donors`GO:0050660^molecular_function^flavin adenine dinucleotide binding`GO:0055114^biological_process^oxidation-reduction process
>LE01Gene13031	7.1669	6.85391	7.12101	11.3466	12.8509	10.102	4.80893	2.36e-15	3.97e-14	>LE01Gene13031	OMT2_PHACR^OMT2_PHACR^Q:229-1569,H:12-446^45.8%ID^E:4.4e-109^RecName: Full=3-O-methyltransferase 2 {ECO:0000303|PubMed:26672450}	PF00891.17^Methyltransf_2^O-methyltransferase^180-370^E:2.9e-27	.	.	GO:0008171^molecular_function^O-methyltransferase activity`GO:0046274^biological_process^lignin catabolic process	GO:0008171^molecular_function^O-methyltransferase activity
>LE01Gene06271	6.57231	7.4226	9.21468	12.2337	13.5916	12.7376	4.80571	2.77e-19	8.11e-18	>LE01Gene06271	UN931_ARATH^UN931_ARATH^Q:44-1333,H:6-443^29.7%ID^E:1.5e-37^RecName: Full=UNC93-like protein 1	PF05978.15^UNC-93^Ion channel regulatory protein UNC-93^82-187^E:1.5e-06	.	KEGG:spo:SPAC6F6.04c	GO:0016021^cellular_component^integral component of membrane`GO:0044212^molecular_function^transcription regulatory region DNA binding`GO:0022857^molecular_function^transmembrane transporter activity`GO:0009062^biological_process^fatty acid catabolic process`GO:0006357^biological_process^regulation of transcription by RNA polymerase II`GO:0055085^biological_process^transmembrane transport	.
>LE01Gene14281	7.78389	8.0605	7.81342	12.1279	12.8741	12.9385	4.80509	2.48e-38	7.43e-36	>LE01Gene14281	.	.	.	.	.	.
>LE01Gene05083	7.0555	7.49375	7.41339	11.2711	10.4316	13.2257	4.80392	6.62e-22	2.7e-20	>LE01Gene05083	YHZ7_SCHPO^YHZ7_SCHPO^Q:102-995,H:126-417^44.7%ID^E:5.8e-63^RecName: Full=Probable glycosidase C21B10.07	PF00722.20^Glyco_hydro_16^Glycosyl hydrolases family 16^75-172^E:4.5e-07	.	KEGG:ang:ANI_1_2196024	GO:0031225^cellular_component^anchored component of membrane`GO:0005886^cellular_component^plasma membrane`GO:0052861^molecular_function^glucan endo-1,3-beta-glucanase activity, C-3 substituted reducing group`GO:0052862^molecular_function^glucan endo-1,4-beta-glucanase activity, C-3 substituted reducing group`GO:0030245^biological_process^cellulose catabolic process	GO:0004553^molecular_function^hydrolase activity, hydrolyzing O-glycosyl compounds`GO:0005975^biological_process^carbohydrate metabolic process
>LE01Gene02143	3.28342	4.19735	4.81949	8.90154	9.51306	8.0964	4.79639	3.54e-15	5.81e-14	>LE01Gene02143	DC4C_ACIAD^DC4C_ACIAD^Q:94-411,H:4-104^32.1%ID^E:1.4e-11^RecName: Full=4-carboxymuconolactone decarboxylase	PF02627.19^CMD^Carboxymuconolactone decarboxylase family^54-121^E:4.9e-14	COG0599^Antioxidant protein with alkyl hydroperoxidase activity. Required for the reduction of the AhpC active site cysteine residues and for the regeneration of the AhpC enzyme activity (By similarity)	KEGG:aci:ACIAD1710`KO:K01607	GO:0047575^molecular_function^4-carboxymuconolactone decarboxylase activity`GO:0051920^molecular_function^peroxiredoxin activity`GO:0042952^biological_process^beta-ketoadipate pathway	GO:0051920^molecular_function^peroxiredoxin activity`GO:0055114^biological_process^oxidation-reduction process
>LE01Gene12429	8.40849	7.06589	6.95499	12.1771	13.1856	11.2322	4.78052	9.56e-22	3.76e-20	>LE01Gene12429	PSIH_PSICU^PSIH_PSICU^Q:231-1706,H:27-500^37.9%ID^E:9.1e-95^RecName: Full=Tryptamine 4-monooxygenase	PF00067.21^p450^Cytochrome P450^44-503^E:2.6e-55	.	KEGG:ag:ASU62246`KO:K22434	GO:0020037^molecular_function^heme binding`GO:0005506^molecular_function^iron ion binding`GO:0004497^molecular_function^monooxygenase activity`GO:0016705^molecular_function^oxidoreductase activity, acting on paired donors, with incorporation or reduction of molecular oxygen	GO:0005506^molecular_function^iron ion binding`GO:0016705^molecular_function^oxidoreductase activity, acting on paired donors, with incorporation or reduction of molecular oxygen`GO:0020037^molecular_function^heme binding`GO:0055114^biological_process^oxidation-reduction process
>LE01Gene04565	7.56471	6.79253	7.04591	12.479	11.5856	11.5441	4.77636	4.66e-23	2.21e-21	>LE01Gene04565	TYRO_PHONA^TYRO_PHONA^Q:1144-2397,H:6-356^30.3%ID^E:4.3e-46^RecName: Full=Tyrosinase {ECO:0000303|PubMed:17617709, ECO:0000312|EMBL:BAF74395.1}	PF00264.19^Tyrosinase^Common central domain of tyrosinase^52-351^E:4.4e-44	.	.	GO:0005507^molecular_function^copper ion binding`GO:0004503^molecular_function^monophenol monooxygenase activity`GO:0042438^biological_process^melanin biosynthetic process`GO:0055114^biological_process^oxidation-reduction process	GO:0016491^molecular_function^oxidoreductase activity
>LE01Gene12930	3.86694	5.72891	4.87013	9.15936	10.3061	9.52644	4.77565	4.31e-19	1.23e-17	>LE01Gene12930	.	PF11807.7^DUF3328^Domain of unknown function (DUF3328)^101-175^E:6.1e-10	.	.	.	GO:0043386^biological_process^mycotoxin biosynthetic process
>LE01Gene02674	10.6524	10.4162	10.9991	16.0704	15.1153	14.9555	4.76067	3.04e-21	1.13e-19	>LE01Gene02674	VMA5A_HUMAN^VMA5A_HUMAN^Q:415-2325,H:17-601^26.9%ID^E:7.6e-38^RecName: Full=von Willebrand factor A domain-containing protein 5A	.	.	.	.	.
>LE01Gene02151	7.89985	8.25962	9.28169	12.8173	13.7998	13.2967	4.75937	1.87e-39	6.61e-37	>LE01Gene02151	.	.	.	.	.	.
>LE01Gene11341	7.83998	9.71481	9.27465	13.8278	14.5533	12.7222	4.7492	7.82e-18	1.83e-16	>LE01Gene11341	B561K_ARATH^B561K_ARATH^Q:414-839,H:203-336^25.9%ID^E:5.5e-06^RecName: Full=Cytochrome b561 and DOMON domain-containing protein At3g07570	PF03188.15^Cytochrom_B561^Eukaryotic cytochrome b561^17-147^E:9.1e-12	ENOG410XR70^Ferric-chelate reductase	KEGG:ath:AT3G59070	GO:0016021^cellular_component^integral component of membrane`GO:0046872^molecular_function^metal ion binding`GO:0055114^biological_process^oxidation-reduction process	.
>LE01Gene08617	9.57376	11.9455	11.1257	15.5098	16.775	14.7505	4.74752	5.1e-11	4.18e-10	>LE01Gene08617	.	.	.	.	.	.
>LE01Gene11765	4.54393	5.23336	6.35228	10.3931	11.0462	8.17068	4.74597	1.62e-13	2e-12	>LE01Gene11765	.	.	.	.	.	.
>LE01Gene11853	3.66094	2.54057	3.71206	7.976	8.52074	7.19615	4.74151	6.07e-19	1.7e-17	>LE01Gene11853	.	.	.	.	.	.
>LE01Gene02415	9.7402	11.0564	10.6947	14.9538	16.2403	13.8376	4.73779	3.04e-11	2.58e-10	>LE01Gene02415	.	.	.	.	.	.
>LE01Gene14282	5.31577	0	3.5965	9.19894	9.12327	7.49767	4.72775	5.41e-11	4.43e-10	>LE01Gene14282	USTYA_ASPFN^USTYA_ASPFN^Q:154-576,H:64-204^28.4%ID^E:5.7e-07^RecName: Full=Oxidase ustYa {ECO:0000303|PubMed:24841822}	PF11807.7^DUF3328^Domain of unknown function (DUF3328)^58-185^E:1.1e-15	.	.	.	GO:0043386^biological_process^mycotoxin biosynthetic process
>LE01Gene08997	9.95579	9.97314	10.358	14.3815	15.7151	13.5499	4.71922	7.68e-10	5.24e-09	>LE01Gene08997	PEM2_PHLRA^PEM2_PHLRA^Q:1487-2656,H:5-390^63.4%ID^E:1.1e-135^RecName: Full=Manganese peroxidase 2	PF00141.22^peroxidase^Peroxidase^174-407^E:8.9e-26`PF11895.7^Peroxidase_ext^Fungal peroxidase extension region^413-489^E:1.9e-29	.	KEGG:ag:CAC85963`KO:K20205	GO:0005576^cellular_component^extracellular region`GO:0020037^molecular_function^heme binding`GO:0016689^molecular_function^manganese peroxidase activity`GO:0046872^molecular_function^metal ion binding`GO:0042744^biological_process^hydrogen peroxide catabolic process`GO:0046274^biological_process^lignin catabolic process`GO:0006979^biological_process^response to oxidative stress	GO:0004601^molecular_function^peroxidase activity`GO:0020037^molecular_function^heme binding`GO:0006979^biological_process^response to oxidative stress`GO:0055114^biological_process^oxidation-reduction process
>LE01Gene02092	9.38138	9.00466	9.04873	13.8627	14.4687	12.7863	4.70839	5.39e-17	1.12e-15	>LE01Gene02092	GLOX_PHACH^GLOX_PHACH^Q:491-2146,H:3-556^59.3%ID^E:3.9e-190^RecName: Full=Aldehyde oxidase GLOX {ECO:0000305}	PF07250.10^Glyoxal_oxid_N^Glyoxal oxidase N-terminus^233-445^E:2.9e-30`PF09118.10^DUF1929^Domain of unknown function (DUF1929)^609-708^E:1.5e-22	.	KEGG:ag:AAA33747`KO:K20929	GO:0005615^cellular_component^extracellular space`GO:0004031^molecular_function^aldehyde oxidase activity`GO:0102797^molecular_function^geranial:oxygen oxidoreductase activity`GO:0102798^molecular_function^heptaldehyde:oxygen oxidoreductase activity`GO:0050665^biological_process^hydrogen peroxide biosynthetic process	.
>LE01Gene11100	7.78389	9.02881	8.87674	13.0485	13.4337	13.5462	4.70241	6.01e-49	4.39e-46	>LE01Gene11100	YIZG_SCHPO^YIZG_SCHPO^Q:432-1772,H:54-499^34.1%ID^E:9.6e-72^RecName: Full=Uncharacterized transporter C1002.16c	PF07690.15^MFS_1^Major Facilitator Superfamily^46-410^E:2.7e-34	.	KEGG:spo:SPAC1002.16c	GO:0032153^cellular_component^cell division site`GO:0051286^cellular_component^cell tip`GO:0005794^cellular_component^Golgi apparatus`GO:0016021^cellular_component^integral component of membrane`GO:0046943^molecular_function^carboxylic acid transmembrane transporter activity`GO:1905039^biological_process^carboxylic acid transmembrane transport	GO:0055085^biological_process^transmembrane transport`GO:0016021^cellular_component^integral component of membrane
>LE01Gene13315	10.915	11.7881	11.1956	14.0491	15.086	17.2066	4.69992	7.73e-06	2.72e-05	>LE01Gene13315	PR1A_HORVU^PR1A_HORVU^Q:446-982,H:3-173^27%ID^E:4.6e-06^RecName: Full=Pathogenesis-related protein 1A/1B	.	.	.	.	.
>LE01Gene12928	3.1319	2.76167	3.01101	6.39712	8.18932	7.30381	4.68814	1.13e-11	1.03e-10	>LE01Gene12928	.	.	.	.	.	.
>LE01Gene06504	6.36706	7.22304	6.50429	11.259	11.7317	11.2009	4.68096	7.55e-24	4.05e-22	>LE01Gene06504	.	.	.	.	.	.
>LE01Gene14242	8.45313	6.01346	7.55167	13.1639	12.3911	9.64286	4.67751	4.23e-09	2.56e-08	>LE01Gene14242	USTS_ASPFN^USTS_ASPFN^Q:101-757,H:24-247^33.2%ID^E:2.2e-20^RecName: Full=Glutathione S-transferase-like protein ustS {ECO:0000303|PubMed:24841822}	.	.	.	.	.
>LE01Gene03883	10.0152	9.97452	10.4017	13.9276	13.7801	15.7594	4.6498	1.27e-10	9.75e-10	>LE01Gene03883	PALY_AMAMU^PALY_AMAMU^Q:152-2287,H:29-737^60.9%ID^E:7.3e-235^RecName: Full=Phenylalanine ammonia-lyase	PF00221.18^Lyase_aromatic^Aromatic amino acid lyase^76-554^E:4e-149	.	.	GO:0005737^cellular_component^cytoplasm`GO:0045548^molecular_function^phenylalanine ammonia-lyase activity`GO:0009800^biological_process^cinnamic acid biosynthetic process`GO:0006559^biological_process^L-phenylalanine catabolic process	.
>LE01Gene06518	6.34999	6.11724	6.98976	10.6321	11.2414	11.4582	4.63228	4.59e-35	1.05e-32	>LE01Gene06518	YC7C_SCHPO^YC7C_SCHPO^Q:169-1638,H:40-534^29.2%ID^E:4.8e-44^RecName: Full=Uncharacterized esterase/lipase C417.12	PF00135.27^COesterase^Carboxylesterase family^36-477^E:6.4e-49`PF07859.12^Abhydrolase_3^alpha/beta hydrolase fold^145-261^E:2.3e-05	COG2272^Carboxylesterase	KEGG:cel:CELE_R12A1.4`KO:K01044	GO:0005788^cellular_component^endoplasmic reticulum lumen`GO:0005777^cellular_component^peroxisome`GO:0052689^molecular_function^carboxylic ester hydrolase activity	GO:0016787^molecular_function^hydrolase activity
>LE01Gene13763	7.04494	7.52428	6.52024	11.7307	12.1068	11.1175	4.63001	4.74e-19	1.35e-17	>LE01Gene13763	C12B2_DROME^C12B2_DROME^Q:921-1436,H:322-497^29.3%ID^E:3.6e-12^RecName: Full=Probable cytochrome P450 12b2, mitochondrial	.	.	.	.	.
>LE01Gene14280	9.04735	9.33896	9.07865	13.442	13.7237	14.1147	4.62806	4.05e-31	5.91e-29	>LE01Gene14280	LAAA_PSEFS^LAAA_PSEFS^Q:32-925,H:1-296^42.6%ID^E:7.7e-68^RecName: Full=L-amino acid amidase {ECO:0000250|UniProtKB:Q76KX0}	PF00561.19^Abhydrolase_1^alpha/beta hydrolase fold^43-295^E:7.8e-16`PF12697.6^Abhydrolase_6^Alpha/beta hydrolase family^45-299^E:6e-06	.	KEGG:pfs:PFLU_1629`KO:K18457	GO:0008233^molecular_function^peptidase activity	.
>LE01Gene11419	5.63043	6.26917	6.59741	10.0928	11.8885	9.11003	4.62315	9.25e-11	7.29e-10	>LE01Gene11419	.	.	.	.	.	.
>LE01Gene13667	7.37526	8.03423	6.87045	11.8858	12.965	10.502	4.60839	9.49e-15	1.44e-13	>LE01Gene13667	.	.	.	.	.	.
>LE01Gene10780	6.29754	7.7216	6.89512	11.8954	12.0612	10.626	4.57326	3.02e-19	8.82e-18	>LE01Gene10780	.	.	.	.	.	.
>LE01Gene06442	9.1569	8.8232	9.16738	13.2526	14.1642	13.1946	4.55425	2.23e-18	5.72e-17	>LE01Gene06442	OPT7_ARATH^OPT7_ARATH^Q:524-2575,H:60-744^28.8%ID^E:2.2e-80^RecName: Full=Oligopeptide transporter 7	PF03169.14^OPT^OPT oligopeptide transporter protein^97-745^E:8.9e-134	ENOG410XNZC^oligo-peptide transporter	KEGG:ath:AT4G16370	GO:0016021^cellular_component^integral component of membrane`GO:0016020^cellular_component^membrane`GO:0005886^cellular_component^plasma membrane`GO:0009506^cellular_component^plasmodesma`GO:0046915^molecular_function^transition metal ion transmembrane transporter activity`GO:0006875^biological_process^cellular metal ion homeostasis`GO:0055072^biological_process^iron ion homeostasis`GO:0007275^bi…	GO:0055085^biological_process^transmembrane transport
>LE01Gene06503	5.08768	6.72842	6.07848	10.5863	11.1772	9.89373	4.55224	1.1e-27	1.06e-25	>LE01Gene06503	APDF_EMENI^APDF_EMENI^Q:115-1299,H:21-410^35.2%ID^E:4.5e-57^RecName: Full=Aspyridones efflux protein apdF {ECO:0000303|PubMed:17369821}	.	.	.	.	.
>LE01Gene11893	9.04999	9.67284	9.59376	12.0176	13.7761	14.9415	4.55206	1.1e-15	1.93e-14	>LE01Gene11893	.	.	.	.	.	.
>LE01Gene11968	8.48083	8.96903	8.37886	12.4633	13.2472	13.5933	4.54423	6.05e-30	7.95e-28	>LE01Gene11968	SIRN_LEPMC^SIRN_LEPMC^Q:138-785,H:5-218^30%ID^E:2.7e-16^RecName: Full=N-methyltransferase sirN {ECO:0000303|PubMed:15387811}	PF13489.5^Methyltransf_23^Methyltransferase domain^38-159^E:5.1e-10`PF01209.17^Ubie_methyltran^ubiE/COQ5 methyltransferase family^49-158^E:2.9e-06`PF13649.5^Methyltransf_25^Methyltransferase domain^54-149^E:4.4e-08`PF08241.11^Methyltransf_11^Methyltransferase domain^56-151^E:0.00017	.	.	.	GO:0008168^molecular_function^methyltransferase activity
>LE01Gene04546	8.20047	9.7684	8.67076	11.8595	14.8333	11.761	4.53336	2.2e-07	1.01e-06	>LE01Gene04546	.	.	.	.	.	.
>LE01Gene01191	8.35389	7.82944	8.97256	13.1393	13.3339	12.2641	4.52504	2.55e-21	9.7e-20	>LE01Gene01191	.	PF00651.30^BTB^BTB/POZ domain^73-174^E:0.00029	.	.	.	GO:0005515^molecular_function^protein binding
>LE01Gene10784	7.8582	7.99662	7.74723	11.9435	12.7295	12.3653	4.51623	3.04e-24	1.73e-22	>LE01Gene10784	AKT7_ALTAL^AKT7_ALTAL^Q:543-1784,H:25-448^29.1%ID^E:1.2e-36^RecName: Full=Cytochrome P450 monooxygenase AKT7 {ECO:0000303|PubMed:24611558}	PF00067.21^p450^Cytochrome P450^100-476^E:3.6e-40	.	.	GO:0016021^cellular_component^integral component of membrane`GO:0020037^molecular_function^heme binding`GO:0005506^molecular_function^iron ion binding`GO:0004497^molecular_function^monooxygenase activity`GO:0016705^molecular_function^oxidoreductase activity, acting on paired donors, with incorporation or reduction of molecular oxygen	GO:0005506^molecular_function^iron ion binding`GO:0016705^molecular_function^oxidoreductase activity, acting on paired donors, with incorporation or reduction of molecular oxygen`GO:0020037^molecular_function^heme binding`GO:0055114^biological_process^oxidation-reduction process
>LE01Gene03693	6.7649	7.06589	7.54389	10.8386	12.0554	11.8161	4.50673	2.63e-25	1.71e-23	>LE01Gene03693	GCY1_YEAST^GCY1_YEAST^Q:435-1274,H:9-304^42%ID^E:5.5e-58^RecName: Full=Glycerol 2-dehydrogenase (NADP(+))	PF00248.20^Aldo_ket_red^Aldo/keto reductase family^20-275^E:1.5e-44	.	KEGG:sce:YOR120W`KO:K18097	GO:0005737^cellular_component^cytoplasm`GO:0004032^molecular_function^alditol:NADP+ 1-oxidoreductase activity`GO:0004033^molecular_function^aldo-keto reductase (NADP) activity`GO:0047953^molecular_function^glycerol 2-dehydrogenase (NADP+) activity`GO:1990042^molecular_function^glycerol dehydrogenase [NAD(P)+] activity`GO:0003729^molecular_function^mRNA binding`GO:0016491^molecular_function^oxidor…	.
>LE01Gene05928	3.66094	3.41093	4.25985	8.15242	8.42663	8.02382	4.49103	8.77e-12	8.08e-11	>LE01Gene05928	LAAA_PSEFS^LAAA_PSEFS^Q:44-937,H:1-296^40.9%ID^E:4.9e-65^RecName: Full=L-amino acid amidase {ECO:0000250|UniProtKB:Q76KX0}	PF00561.19^Abhydrolase_1^alpha/beta hydrolase fold^47-299^E:1.6e-15	.	KEGG:pfs:PFLU_1629`KO:K18457	GO:0008233^molecular_function^peptidase activity	.
>LE01Gene04296	6.08706	6.17611	7.24132	11.0634	11.3012	10.8322	4.49063	1.06e-28	1.15e-26	>LE01Gene04296	ALF_COCIM^ALF_COCIM^Q:197-1063,H:5-295^35.1%ID^E:1.5e-40^RecName: Full=Putative fructose-bisphosphate aldolase	PF01116.19^F_bP_aldolase^Fructose-bisphosphate aldolase class-II^10-292^E:8e-69	.	.	.	GO:0008270^molecular_function^zinc ion binding`GO:0016832^molecular_function^aldehyde-lyase activity`GO:0005975^biological_process^carbohydrate metabolic process
>LE01Gene01179	7.17661	8.22751	8.56714	12.1014	13.3303	11.8512	4.48572	3.65e-18	9.07e-17	>LE01Gene01179	.	.	.	.	.	.
>LE01Gene01189	6.18655	6.35659	6.36998	11.2227	11.0954	9.38204	4.4827	5.54e-18	1.33e-16	>LE01Gene01189	.	.	.	.	.	.
>LE01Gene09092	5.63043	7.93546	7.16224	10.1792	11.8452	12.2498	4.48116	2.44e-05	7.89e-05	>LE01Gene09092	.	.	.	.	.	.
>LE01Gene14283	5.91205	5.03563	5.98966	10.413	10.3623	9.53851	4.47829	8.7e-30	1.09e-27	>LE01Gene14283	.	.	.	.	.	.
>LE01Gene05351	6.33272	7.01306	6.93134	10.558	11.5964	11.3899	4.46959	1.22e-47	7.51e-45	>LE01Gene05351	.	.	.	.	.	.
>LE01Gene13515	7.73214	7.46256	7.97831	13.0052	11.2477	11.7674	4.46932	3.88e-09	2.37e-08	>LE01Gene13515	.	.	.	.	.	.
>LE01Gene12239	6.85234	6.68854	6.67067	10.6913	12.0023	10.3205	4.46874	1.12e-09	7.42e-09	>LE01Gene12239	HPCH_SALDC^HPCH_SALDC^Q:985-1794,H:3-252^33.2%ID^E:8.8e-29^RecName: Full=4-hydroxy-2-oxo-heptane-1,7-dioate aldolase {ECO:0000255|HAMAP-Rule:MF_01292}	PF03328.13^HpcH_HpaI^HpcH/HpaI aldolase/citrate lyase family^41-261^E:2.4e-30	.	KEGG:sed:SeD_A1181`KO:K02510	GO:0018802^molecular_function^2,4-dihydroxyhept-2-ene-1,7-dioate aldolase activity`GO:0046872^molecular_function^metal ion binding`GO:0010124^biological_process^phenylacetate catabolic process	GO:0003824^molecular_function^catalytic activity
>LE01Gene08141	4.54393	3.27392	4.47144	8.92116	8.69234	8.01233	4.46787	6.57e-15	1.03e-13	>LE01Gene08141	.	.	.	.	.	.
>LE01Gene06987	8.38773	8.30867	8.48828	13.515	12.8399	11.6517	4.46424	9.4e-17	1.89e-15	>LE01Gene06987	.	.	.	.	.	.
>LE01Gene10785	8.32361	9.00466	8.48422	13.3009	13.4378	12.3014	4.4634	2.01e-22	8.78e-21	>LE01Gene10785	YKJ7_SCHPO^YKJ7_SCHPO^Q:121-984,H:5-289^33.8%ID^E:1.2e-26^RecName: Full=Putative uncharacterized oxidoreductase C513.07	PF01370.20^Epimerase^NAD dependent epimerase/dehydratase family^42-287^E:2e-23`PF01073.18^3Beta_HSD^3-beta hydroxysteroid dehydrogenase/isomerase family^43-283^E:6e-16`PF16363.4^GDP_Man_Dehyd^GDP-mannose 4,6 dehydratase^43-164^E:2.6e-10`PF13460.5^NAD_binding_10^NAD(P)H-binding^47-164^E:3.7e-10`PF07993.11^NAD_binding_4^Male sterility protein^100-269^E:4.2e-09	.	KEGG:spo:SPAC513.07	GO:0005829^cellular_component^cytosol`GO:0005634^cellular_component^nucleus`GO:0050662^molecular_function^coenzyme binding`GO:0043892^molecular_function^methylglyoxal reductase (NADPH-dependent) activity	GO:0003824^molecular_function^catalytic activity`GO:0050662^molecular_function^coenzyme binding`GO:0003854^molecular_function^3-beta-hydroxy-delta5-steroid dehydrogenase activity`GO:0016616^molecular_function^oxidoreductase activity, acting on the CH-OH group of donors, NAD or NADP as acceptor`GO:0006694^biological_process^steroid biosynthetic process`GO:0055114^biological_process^oxidation-reduc…
>LE01Gene06847	6.14757	6.77993	6.45538	9.63899	12.1201	9.22157	4.45964	5.82e-16	1.06e-14	>LE01Gene06847	PRTA_ASPNG^PRTA_ASPNG^Q:109-921,H:1-281^37.9%ID^E:2.9e-35^RecName: Full=Aspergillopepsin-2	PF01828.16^Peptidase_A4^Peptidase A4 family^102-307^E:8.1e-61	ENOG4111QIQ^aspergillopepsin-2	.	GO:0004190^molecular_function^aspartic-type endopeptidase activity	GO:0004190^molecular_function^aspartic-type endopeptidase activity`GO:0006508^biological_process^proteolysis
>LE01Gene05927	0	0	2.81814	5.19211	5.27393	5.87881	4.45845	3.7e-06	1.39e-05	>LE01Gene05927	.	.	.	.	.	.
>LE01Gene11250	9.25184	9.07078	10.3457	14.3843	14.3223	13.5138	4.45307	3.28e-27	2.82e-25	>LE01Gene11250	.	.	.	.	.	.
>LE01Gene03561	7.45724	7.32193	7.18242	11.6266	11.9216	11.7191	4.4445	2.91e-97	1.7e-93	>LE01Gene03561	MX1_ICTPU^MX1_ICTPU^Q:300-2438,H:6-635^25%ID^E:4e-45^RecName: Full=Interferon-induced GTP-binding protein Mx1	PF01926.22^MMR_HSR1^50S ribosome-binding GTPase^99-289^E:5.5e-05`PF00350.22^Dynamin_N^Dynamin family^100-310^E:3.3e-28`PF01031.19^Dynamin_M^Dynamin central region^327-615^E:3.3e-24`PF02212.17^GED^Dynamin GTPase effector domain^695-781^E:1.5e-13	.	KEGG:ipu:100304594`KO:K14754	GO:0005737^cellular_component^cytoplasm`GO:0005525^molecular_function^GTP binding`GO:0003924^molecular_function^GTPase activity	GO:0005525^molecular_function^GTP binding`GO:0003924^molecular_function^GTPase activity
>LE01Gene08192	3.28342	3.41093	2.81814	5.63395	8.31285	7.26558	4.40652	1.48e-08	8.23e-08	>LE01Gene08192	C505_ASPOR^C505_ASPOR^Q:355-1503,H:11-469^37.7%ID^E:1.2e-76^RecName: Full=Bifunctional cytochrome P450/NADPH--P450 reductase {ECO:0000305}	PF00067.21^p450^Cytochrome P450^14-181^E:4.4e-08`PF00067.21^p450^Cytochrome P450^231-370^E:1.8e-26	COG0369^Component of the sulfite reductase complex that catalyzes the 6-electron reduction of sulfite to sulfide. This is one of several activities required for the biosynthesis of L- cysteine from sulfate. The flavoprotein component catalyzes the electron flow from NADPH - FAD - FMN to the hemoprotein component (By similarity)	KEGG:fvr:FVEG_00317`KO:K14338	GO:0070330^molecular_function^aromatase activity`GO:0010181^molecular_function^FMN binding`GO:0020037^molecular_function^heme binding`GO:0005506^molecular_function^iron ion binding`GO:0003958^molecular_function^NADPH-hemoprotein reductase activity	GO:0005506^molecular_function^iron ion binding`GO:0016705^molecular_function^oxidoreductase activity, acting on paired donors, with incorporation or reduction of molecular oxygen`GO:0020037^molecular_function^heme binding`GO:0055114^biological_process^oxidation-reduction process
>LE01Gene01353	8.6715	8.94102	8.24616	13.1497	13.8196	10.6878	4.39203	1.18e-08	6.68e-08	>LE01Gene01353	.	PF12296.7^HsbA^Hydrophobic surface binding protein A^66-197^E:8.5e-25	.	.	.	.
>LE01Gene08249	6.57231	8.01285	7.63457	11.499	12.2864	11.7411	4.36419	7.65e-31	1.09e-28	>LE01Gene08249	.	.	.	.	.	.
>LE01Gene01375	1.55654	2.54057	1.59336	7.38046	2.957	3.21153	4.362	0.000119961	0.00033892	>LE01Gene01375	.	.	.	.	.	.
>LE01Gene00623	8.34099	8.05005	8.52034	12.8873	11.8588	12.9998	4.35266	1.04e-29	1.28e-27	>LE01Gene00623	YGI2_SCHPO^YGI2_SCHPO^Q:117-1013,H:1-294^33.4%ID^E:6.6e-36^RecName: Full=Uncharacterized protein C2A9.02	PF04321.16^RmlD_sub_bind^RmlD substrate binding domain^41-290^E:4.9e-06`PF01370.20^Epimerase^NAD dependent epimerase/dehydratase family^42-259^E:2.7e-15`PF16363.4^GDP_Man_Dehyd^GDP-mannose 4,6 dehydratase^42-324^E:7.9e-08`PF05368.12^NmrA^NmrA-like family^43-111^E:9e-08`PF13460.5^NAD_binding_10^NAD(P)H-binding^45-180^E:6.4e-09	.	.	.	GO:0003824^molecular_function^catalytic activity`GO:0050662^molecular_function^coenzyme binding
>LE01Gene12265	0	0	2.59545	5.39822	5.23744	4.56829	4.34358	1.23e-05	4.17e-05	>LE01Gene12265	.	.	.	.	.	.
>LE01Gene05826	9.08394	8.83846	9.86743	13.5419	14.3664	12.5495	4.33722	3.7e-21	1.36e-19	>LE01Gene05826	.	.	.	.	.	.
>LE01Gene04820	8.7088	8.88625	8.81991	12.475	13.0655	13.6476	4.33715	3.03e-48	2.08e-45	>LE01Gene04820	DTXS3_METRA^DTXS3_METRA^Q:2343-3371,H:20-369^54.3%ID^E:5.9e-102^RecName: Full=Aldo-keto reductase dtxS3 {ECO:0000305}	PF00732.18^GMC_oxred_N^GMC oxidoreductase^43-356^E:1.3e-55`PF05199.12^GMC_oxred_C^GMC oxidoreductase^464-604^E:4.4e-29`PF00248.20^Aldo_ket_red^Aldo/keto reductase family^642-952^E:7.4e-68	.	KEGG:maj:MAA_10045	GO:0016491^molecular_function^oxidoreductase activity	GO:0016614^molecular_function^oxidoreductase activity, acting on CH-OH group of donors`GO:0050660^molecular_function^flavin adenine dinucleotide binding`GO:0055114^biological_process^oxidation-reduction process
>LE01Gene00557	9.53464	9.85351	10.5853	13.673	15.0585	14.072	4.33103	4.94e-24	2.7e-22	>LE01Gene00557	FUM15_GIBM7^FUM15_GIBM7^Q:195-1730,H:37-559^25.2%ID^E:2.8e-38^RecName: Full=Cytochrome P450 monooxygenase FUM15 {ECO:0000303|PubMed:12620260}	PF00067.21^p450^Cytochrome P450^61-536^E:3.9e-66	COG2124^Cytochrome p450	KEGG:ocu:100328954`KO:K07424	GO:0005789^cellular_component^endoplasmic reticulum membrane`GO:0031090^cellular_component^organelle membrane`GO:0070330^molecular_function^aromatase activity`GO:0020037^molecular_function^heme binding`GO:0005506^molecular_function^iron ion binding`GO:0004497^molecular_function^monooxygenase activity	GO:0005506^molecular_function^iron ion binding`GO:0016705^molecular_function^oxidoreductase activity, acting on paired donors, with incorporation or reduction of molecular oxygen`GO:0020037^molecular_function^heme binding`GO:0055114^biological_process^oxidation-reduction process
>LE01Gene06011	5.00287	5.118	5.26018	9.42786	9.88006	8.73311	4.33032	2.48e-20	8.34e-19	>LE01Gene06011	.	.	.	.	.	.
>LE01Gene03968	8.0606	7.97468	8.05145	8.89871	10.0903	13.7795	4.32285	0.000422455	0.00107813	>LE01Gene03968	.	.	.	.	.	.
>LE01Gene05186	4.41856	5.59151	6.59741	7.38046	8.41442	11.4255	4.31628	0.000101121	0.000289615	>LE01Gene05186	CARP_IRPLA^CARP_IRPLA^Q:553-1557,H:5-340^51.3%ID^E:3.5e-84^RecName: Full=Polyporopepsin	.	.	.	.	.
>LE01Gene09015	6.86441	6.19521	6.61236	11.029	11.3591	9.80822	4.30093	1.55e-17	3.5e-16	>LE01Gene09015	.	.	.	.	.	.
>LE01Gene05418	7.88807	7.92977	8.13148	12.438	12.9657	10.2767	4.2856	2.81e-08	1.48e-07	>LE01Gene05418	ASPR1_PHARH^ASPR1_PHARH^Q:10-1269,H:5-402^39.6%ID^E:1.5e-68^RecName: Full=Aspartic protease {ECO:0000303|PubMed:10091328, ECO:0000312|EMBL:AAC17105.1}	PF00026.22^Asp^Eukaryotic aspartyl protease^116-424^E:9.9e-73	.	.	GO:0005576^cellular_component^extracellular region`GO:0004190^molecular_function^aspartic-type endopeptidase activity`GO:0006508^biological_process^proteolysis	.
>LE01Gene11764	1.96799	0	1.59336	4.81435	5.8096	3.85079	4.28148	0.00186848	0.00417127	>LE01Gene11764	.	.	.	.	.	.
>LE01Gene11064	8.29268	8.69823	8.20236	11.5372	12.4979	13.4355	4.28047	3.22e-09	1.98e-08	>LE01Gene11064	PSIH_PSICU^PSIH_PSICU^Q:454-1950,H:19-481^35.5%ID^E:1.8e-87^RecName: Full=Tryptamine 4-monooxygenase	PF00067.21^p450^Cytochrome P450^161-635^E:2.3e-45	.	KEGG:nfi:NFIA_093730`KO:K17827	GO:0016021^cellular_component^integral component of membrane`GO:0020037^molecular_function^heme binding`GO:0005506^molecular_function^iron ion binding`GO:0004497^molecular_function^monooxygenase activity`GO:0016705^molecular_function^oxidoreductase activity, acting on paired donors, with incorporation or reduction of molecular oxygen`GO:0009820^biological_process^alkaloid metabolic process	GO:0005506^molecular_function^iron ion binding`GO:0016705^molecular_function^oxidoreductase activity, acting on paired donors, with incorporation or reduction of molecular oxygen`GO:0020037^molecular_function^heme binding`GO:0055114^biological_process^oxidation-reduction process
>LE01Gene05931	7.84608	9.32385	8.48422	13.0484	13.1639	12.5209	4.26189	2.34e-27	2.05e-25	>LE01Gene05931	.	.	.	.	.	.
>LE01Gene09304	7.21483	6.9012	7.26989	11.585	11.3994	11.1175	4.25242	2.47e-45	1.31e-42	>LE01Gene09304	IMQG_ASPFN^IMQG_ASPFN^Q:390-1028,H:22-245^36%ID^E:2.5e-30^RecName: Full=O-methyltransferase imqG {ECO:0000303|PubMed:29182847}	PF01596.16^Methyltransf_3^O-methyltransferase^47-211^E:1.2e-37`PF01135.18^PCMT^Protein-L-isoaspartate(D-aspartate) O-methyltransferase (PCMT)^70-155^E:1.6e-05`PF13847.5^Methyltransf_31^Methyltransferase domain^72-180^E:2e-08`PF13649.5^Methyltransf_25^Methyltransferase domain^75-172^E:2.1e-06`PF13578.5^Methyltransf_24^Methyltransferase domain^76-179^E:8.6e-15`PF08241.11^Methyltransf_11^Methyltrans…	.	KEGG:afv:AFLA_064290	GO:0046872^molecular_function^metal ion binding`GO:0008171^molecular_function^O-methyltransferase activity	GO:0008171^molecular_function^O-methyltransferase activity`GO:0008168^molecular_function^methyltransferase activity
>LE01Gene11069	7.49655	8.25052	7.88289	11.8141	12.5953	11.8338	4.2256	3.9e-33	7.24e-31	>LE01Gene11069	.	PF13673.6^Acetyltransf_10^Acetyltransferase (GNAT) domain^132-201^E:9.5e-06`PF00583.24^Acetyltransf_1^Acetyltransferase (GNAT) family^136-193^E:0.00013`PF13508.6^Acetyltransf_7^Acetyltransferase (GNAT) domain^141-193^E:2.6e-06	.	.	.	.
>LE01Gene03870	8.80587	9.70318	9.33223	12.7969	14.1462	13.3789	4.22264	7.1e-30	9.13e-28	>LE01Gene03870	SUOX_HUMAN^SUOX_HUMAN^Q:664-1740,H:193-542^37.4%ID^E:2.9e-56^RecName: Full=Sulfite oxidase, mitochondrial	PF00174.18^Oxidored_molyb^Oxidoreductase molybdopterin binding domain^130-315^E:2.6e-46`PF03404.15^Mo-co_dimer^Mo-co oxidoreductase dimerisation domain^341-462^E:1.4e-22	COG2041^The exact function is not known. Can catalyze the reduction of a variety of substrates like dimethyl sulfoxide, trimethylamine N-oxide, phenylmethyl sulfoxide and L-methionine sulfoxide. Cannot reduce cyclic N-oxides. Shows no activity as sulfite oxidase (By similarity)	KEGG:hsa:6821`KO:K00387	GO:0005758^cellular_component^mitochondrial intermembrane space`GO:0005759^cellular_component^mitochondrial matrix`GO:0020037^molecular_function^heme binding`GO:0030151^molecular_function^molybdenum ion binding`GO:0043546^molecular_function^molybdopterin cofactor binding`GO:0008482^molecular_function^sulfite oxidase activity`GO:0042128^biological_process^nitrate assimilation`GO:0070221^biological…	GO:0042128^biological_process^nitrate assimilation`GO:0016491^molecular_function^oxidoreductase activity`GO:0030151^molecular_function^molybdenum ion binding`GO:0055114^biological_process^oxidation-reduction process
>LE01Gene05204	0	4.03722	0	5.71329	6.25517	7.35021	4.22162	1.34e-05	4.53e-05	>LE01Gene05204	.	.	.	.	.	.
>LE01Gene10141	8.75491	9.04995	9.07865	13.3248	13.3304	12.7402	4.19145	3.21e-51	2.68e-48	>LE01Gene10141	.	PF03372.22^Exo_endo_phos^Endonuclease/Exonuclease/phosphatase family^58-314^E:4.4e-10	.	.	.	.
>LE01Gene05934	6.60145	6.85391	5.36983	9.95547	10.8219	10.7712	4.17802	6.28e-15	9.89e-14	>LE01Gene05934	.	.	.	.	.	.
>LE01Gene13895	7.00188	6.82967	6.22186	10.0335	10.7923	11.474	4.17469	2.21e-07	1.01e-06	>LE01Gene13895	.	.	.	.	.	.
>LE01Gene00261	4.60275	5.0774	4.09931	8.62891	9.50157	7.43015	4.1586	3.81e-11	3.19e-10	>LE01Gene00261	YUC9_ARATH^YUC9_ARATH^Q:592-1581,H:26-334^28.7%ID^E:9.6e-31^RecName: Full=Probable indole-3-pyruvate monooxygenase YUCCA9	PF00743.18^FMO-like^Flavin-binding monooxygenase-like^175-378^E:1.3e-17`PF13738.5^Pyr_redox_3^Pyridine nucleotide-disulphide oxidoreductase^176-372^E:3.2e-19`PF07992.13^Pyr_redox_2^Pyridine nucleotide-disulphide oxidoreductase^274-376^E:8.1e-09`PF13434.5^K_oxygenase^L-lysine 6-monooxygenase (NADPH-requiring)^279-372^E:1.1e-10	COG2072^Monooxygenase	KEGG:ath:AT1G21430`KO:K11816	GO:0016020^cellular_component^membrane`GO:0050660^molecular_function^flavin adenine dinucleotide binding`GO:0103075^molecular_function^indole-3-pyruvate monooxygenase activity`GO:0004499^molecular_function^N,N-dimethylaniline monooxygenase activity`GO:0050661^molecular_function^NADP binding`GO:0009851^biological_process^auxin biosynthetic process	GO:0004499^molecular_function^N,N-dimethylaniline monooxygenase activity`GO:0050660^molecular_function^flavin adenine dinucleotide binding`GO:0050661^molecular_function^NADP binding`GO:0055114^biological_process^oxidation-reduction process`GO:0016491^molecular_function^oxidoreductase activity
>LE01Gene10029	7.55729	7.7216	7.2509	11.9259	11.8944	11.0254	4.15536	1.32e-27	1.26e-25	>LE01Gene10029	.	.	.	.	.	.
>LE01Gene12574	6.75196	5.94741	5.59728	10.4655	10.7994	9.29695	4.15228	1.25e-16	2.47e-15	>LE01Gene12574	.	.	.	.	.	.
>LE01Gene08054	6.33272	7.0865	6.72671	9.32427	11.6482	10.7941	4.13778	6.46e-15	1.01e-13	>LE01Gene08054	.	.	.	.	.	.
>LE01Gene05713	8.73533	8.9579	7.82631	12.7801	13.1349	12.0038	4.13289	3.4e-24	1.92e-22	>LE01Gene05713	YJCD_SCHPO^YJCD_SCHPO^Q:237-1097,H:15-307^33%ID^E:2e-32^RecName: Full=Uncharacterized oxidoreductase C736.13	PF00106.24^adh_short^short chain dehydrogenase^26-175^E:1.6e-24`PF08659.9^KR^KR domain^28-148^E:3.7e-07`PF01370.20^Epimerase^NAD dependent epimerase/dehydratase family^28-248^E:1.6e-05`PF13561.5^adh_short_C2^Enoyl-(Acyl carrier protein) reductase^35-164^E:1.1e-14	COG1028^Dehydrogenase reductase	KEGG:hsa:51109`KO:K11152	GO:0005789^cellular_component^endoplasmic reticulum membrane`GO:0016021^cellular_component^integral component of membrane`GO:0005622^cellular_component^intracellular`GO:0001917^cellular_component^photoreceptor inner segment`GO:0052650^molecular_function^NADP-retinol dehydrogenase activity`GO:0016616^molecular_function^oxidoreductase activity, acting on the CH-OH group of donors, NAD or NADP as ac…	GO:0003824^molecular_function^catalytic activity`GO:0050662^molecular_function^coenzyme binding
>LE01Gene09722	7.83998	8.05005	7.81342	10.609	11.5409	12.9534	4.12203	1.04e-24	6.26e-23	>LE01Gene09722	.	.	.	.	.	.
>LE01Gene02144	4.12949	4.47249	5.36983	8.96234	8.98702	8.3412	4.08884	8.38e-06	2.93e-05	>LE01Gene02144	3HIDH_CAEEL^3HIDH_CAEEL^Q:37-921,H:5-293^37.2%ID^E:2.5e-42^RecName: Full=Probable 3-hydroxyisobutyrate dehydrogenase, mitochondrial	PF03446.14^NAD_binding_2^NAD binding domain of 6-phosphogluconate dehydrogenase^12-176^E:1.9e-23`PF14833.5^NAD_binding_11^NAD-binding of NADP-dependent 3-hydroxyisobutyrate dehydrogenase^182-301^E:2.8e-23	COG2084^Dehydrogenase	KEGG:ddi:DDB_G0292566`KO:K00020	GO:0005739^cellular_component^mitochondrion`GO:0008442^molecular_function^3-hydroxyisobutyrate dehydrogenase activity`GO:0051287^molecular_function^NAD binding`GO:0050661^molecular_function^NADP binding`GO:0006574^biological_process^valine catabolic process	GO:0050661^molecular_function^NADP binding`GO:0051287^molecular_function^NAD binding
>LE01Gene06502	10.1383	10.6906	9.29101	14.0948	14.452	14.1114	4.08116	2.23e-28	2.35e-26	>LE01Gene06502	.	PF12697.6^Abhydrolase_6^Alpha/beta hydrolase family^46-332^E:5.5e-08	.	.	.	.
>LE01Gene14628	5.81588	4.11951	4.4043	8.56975	9.21293	9.12879	4.05647	9.16e-23	4.16e-21	>LE01Gene14628	.	.	.	.	.	.
>LE01Gene12209	6.72574	6.47072	6.96668	10.151	11.5442	10.1526	4.05413	2.55e-17	5.46e-16	>LE01Gene12209	YKM2_SCHPO^YKM2_SCHPO^Q:315-1817,H:29-529^36.7%ID^E:3.4e-83^RecName: Full=Uncharacterized amino-acid permease PB24D3.02c	PF13520.5^AA_permease_2^Amino acid permease^25-466^E:8e-52`PF00324.20^AA_permease^Amino acid permease^50-445^E:1.9e-10	.	KEGG:spo:SPAC11D3.08c	GO:0005737^cellular_component^cytoplasm`GO:0005887^cellular_component^integral component of plasma membrane`GO:0015171^molecular_function^amino acid transmembrane transporter activity`GO:0015297^molecular_function^antiporter activity`GO:0015179^molecular_function^L-amino acid transmembrane transporter activity`GO:0003333^biological_process^amino acid transmembrane transport	GO:0022857^molecular_function^transmembrane transporter activity`GO:0055085^biological_process^transmembrane transport`GO:0016020^cellular_component^membrane
>LE01Gene04953	0	0	2.00945	4.30119	3.65504	4.29223	4.04143	0.000649193	0.00159481	>LE01Gene04953	.	.	.	.	.	.
>LE01Gene04199	8.54598	11.1998	12.0817	15.6603	15.0116	14.936	4.04084	2.1e-11	1.82e-10	>LE01Gene04199	PRTA_ASPNG^PRTA_ASPNG^Q:118-936,H:1-282^46.4%ID^E:4.5e-51^RecName: Full=Aspergillopepsin-2	PF01828.16^Peptidase_A4^Peptidase A4 family^69-271^E:2.7e-71	ENOG4111QIQ^aspergillopepsin-2	.	GO:0004190^molecular_function^aspartic-type endopeptidase activity	GO:0004190^molecular_function^aspartic-type endopeptidase activity`GO:0006508^biological_process^proteolysis
>LE01Gene02677	10.4798	9.22045	10.4315	14.6875	13.9133	13.7392	4.02749	4.06e-16	7.59e-15	>LE01Gene02677	AUD_PHACH^AUD_PHACH^Q:388-3039,H:16-899^48.6%ID^E:6.9e-246^RecName: Full=Aldos-2-ulose dehydratase	.	.	.	.	.
>LE01Gene06376	7.93461	8.35186	7.59748	11.6402	12.6772	11.3748	4.02351	1.03e-19	3.18e-18	>LE01Gene06376	.	.	.	.	.	.
>LE01Gene13819	8.39607	7.68828	7.24132	10.4424	13.2024	8.66866	4.02045	9.25e-06	3.21e-05	>LE01Gene13819	.	.	.	.	.	.
>LE01Gene03875	9.5902	8.58694	9.34795	12.5216	13.0503	13.8294	4.00267	1.51e-27	1.4e-25	>LE01Gene03875	VRDA_ASPPA^VRDA_ASPPA^Q:95-1105,H:1-338^50.9%ID^E:4.3e-85^RecName: Full=Versiconal hemiacetal acetate reductase	PF00248.20^Aldo_ket_red^Aldo/keto reductase family^23-338^E:1.5e-64	.	KEGG:ag:BAH24200`KO:K17647	GO:0102974^molecular_function^hydroxyversicolorone reductase activity`GO:0102975^molecular_function^versiconal hemiacetal acetate reductase activity`GO:0102976^molecular_function^versiconal reductase activity	.
>LE01Gene09520	6.85234	7.85968	6.4387	9.68071	12.1301	10.6503	4.00017	3.3e-13	3.87e-12	>LE01Gene09520	.	.	.	.	.	.
>LE01Gene08448	9.90848	10.4603	9.34124	14.069	14.288	13.4273	3.9986	3.09e-20	1.03e-18	>LE01Gene08448	.	.	.	.	.	.
>LE01Gene06410	6.22451	6.19521	7.65637	10.6533	11.4571	10.0382	3.98016	2.62e-14	3.73e-13	>LE01Gene06410	ALCS_ASPFC^ALCS_ASPFC^Q:495-1214,H:32-272^31.7%ID^E:3.9e-27^RecName: Full=Protein alcS {ECO:0000250|UniProtKB:Q460G9}	PF01184.18^Grp1_Fun34_YaaH^GPR1/FUN34/yaaH family^51-253^E:3e-30	.	.	GO:0030428^cellular_component^cell septum`GO:0016021^cellular_component^integral component of membrane`GO:0005886^cellular_component^plasma membrane	GO:0016021^cellular_component^integral component of membrane
>LE01Gene05932	5.12829	6.32226	6.12092	10.0128	10.3506	9.00953	3.97302	7.45e-15	1.16e-13	>LE01Gene05932	.	.	.	.	.	.
>LE01Gene09829	10.2216	10.6651	9.95361	14.3256	14.3758	14.1153	3.96727	5.28e-14	7.14e-13	>LE01Gene09829	.	.	.	.	.	.
>LE01Gene06517	7.75825	8.12666	8.37449	11.7244	12.3828	11.9797	3.95144	3.52e-26	2.56e-24	>LE01Gene06517	PGDAE_HELPG^PGDAE_HELPG^Q:264-1118,H:2-285^60.7%ID^E:1.9e-104^RecName: Full=Peptidoglycan deacetylase	PF01522.20^Polysacc_deac_1^Polysaccharide deacetylase^43-147^E:1.3e-14	.	KEGG:hpg:HPG27_289`KO:K22278	GO:0046555^molecular_function^acetylxylan esterase activity`GO:0016810^molecular_function^hydrolase activity, acting on carbon-nitrogen (but not peptide) bonds`GO:0046872^molecular_function^metal ion binding`GO:0071555^biological_process^cell wall organization`GO:0045493^biological_process^xylan catabolic process	GO:0016810^molecular_function^hydrolase activity, acting on carbon-nitrogen (but not peptide) bonds`GO:0005975^biological_process^carbohydrate metabolic process
>LE01Gene01340	8.33232	8.82626	9.64192	12.821	13.8035	11.3899	3.94509	3.54e-08	1.84e-07	>LE01Gene01340	CPYI_YEAST^CPYI_YEAST^Q:345-749,H:20-177^29.4%ID^E:2.1e-10^RecName: Full=Carboxypeptidase Y inhibitor	PF01161.19^PBP^Phosphatidylethanolamine-binding protein^87-210^E:2.3e-10	.	.	.	.
>LE01Gene12211	6.10751	7.89515	7.94327	12.1988	11.7338	8.41727	3.94045	1.08e-05	3.7e-05	>LE01Gene12211	HOL3_ARATH^HOL3_ARATH^Q:61-666,H:11-187^40.1%ID^E:2.1e-28^RecName: Full=Probable thiol methyltransferase 2	PF05724.10^TPMT^Thiopurine S-methyltransferase (TPMT)^29-206^E:7.8e-30`PF08241.11^Methyltransf_11^Methyltransferase domain^74-178^E:8.9e-09`PF13847.5^Methyltransf_31^Methyltransferase domain^75-179^E:1.2e-08`PF13649.5^Methyltransf_25^Methyltransferase domain^76-175^E:1.3e-10	COG0500^Methyltransferase	KEGG:ath:AT2G43940`KO:K21552	GO:0009507^cellular_component^chloroplast`GO:0009941^cellular_component^chloroplast envelope`GO:0018708^molecular_function^thiol S-methyltransferase activity	GO:0008757^molecular_function^S-adenosylmethionine-dependent methyltransferase activity`GO:0008168^molecular_function^methyltransferase activity
>LE01Gene02678	11.0832	9.77476	11.3203	15.5079	14.2399	14.2549	3.93236	1.39e-13	1.73e-12	>LE01Gene02678	P2OX_TRIMT^P2OX_TRIMT^Q:551-2125,H:33-548^57.9%ID^E:1.1e-173^RecName: Full=Pyranose 2-oxidase	PF00732.18^GMC_oxred_N^GMC oxidoreductase^297-373^E:3.7e-06`PF05199.12^GMC_oxred_C^GMC oxidoreductase^501-608^E:1.7e-10	.	.	GO:0050660^molecular_function^flavin adenine dinucleotide binding`GO:0050233^molecular_function^pyranose oxidase activity	GO:0016614^molecular_function^oxidoreductase activity, acting on CH-OH group of donors`GO:0050660^molecular_function^flavin adenine dinucleotide binding`GO:0055114^biological_process^oxidation-reduction process
>LE01Gene02731	9.28365	9.39579	8.9984	11.7295	12.0205	14.2657	3.91563	4.92e-06	1.8e-05	>LE01Gene02731	FUM15_GIBM7^FUM15_GIBM7^Q:342-1892,H:34-567^24.2%ID^E:6.4e-42^RecName: Full=Cytochrome P450 monooxygenase FUM15 {ECO:0000303|PubMed:12620260}	.	.	.	.	.
>LE01Gene11424	7.02357	6.71525	7.0893	9.81865	11.8833	9.71023	3.90444	7.02e-12	6.58e-11	>LE01Gene11424	MAOX_DICDI^MAOX_DICDI^Q:160-1713,H:34-540^46.6%ID^E:7e-127^RecName: Full=NADP-dependent malic enzyme	.	.	.	.	.
>LE01Gene11181	6.41708	4.19735	3.91864	7.94346	8.17492	10.234	3.90394	2.96e-09	1.83e-08	>LE01Gene11181	.	.	.	.	.	.
>LE01Gene11900	4.54393	4.80642	6.5516	8.60137	9.65472	9.83458	3.89033	7.56e-15	1.17e-13	>LE01Gene11900	.	.	.	.	.	.
>LE01Gene08727	7.73871	8.42245	8.13148	11.2618	12.1375	12.3717	3.87726	8.88e-29	9.79e-27	>LE01Gene08727	OPT3_ARATH^OPT3_ARATH^Q:261-2420,H:12-718^28.9%ID^E:1.6e-75^RecName: Full=Oligopeptide transporter 3	PF03169.14^OPT^OPT oligopeptide transporter protein^92-751^E:2.1e-149	ENOG410XNZC^oligo-peptide transporter	KEGG:ath:AT4G16370	GO:0016021^cellular_component^integral component of membrane`GO:0016020^cellular_component^membrane`GO:0005886^cellular_component^plasma membrane`GO:0009506^cellular_component^plasmodesma`GO:0046915^molecular_function^transition metal ion transmembrane transporter activity`GO:0006875^biological_process^cellular metal ion homeostasis`GO:0055072^biological_process^iron ion homeostasis`GO:0007275^bi…	GO:0055085^biological_process^transmembrane transport
>LE01Gene07527	9.77259	9.82314	9.80047	13.5572	13.9566	13.4141	3.864	5.92e-33	1.05e-30	>LE01Gene07527	FCK2_FUSPC^FCK2_FUSPC^Q:911-2416,H:64-550^32%ID^E:2.1e-56^RecName: Full=Cytochrome P450 monooxygenase FCK2 {ECO:0000303|PubMed:28802024}	.	.	.	.	.
>LE01Gene10519	8.42895	8.84452	8.61988	11.5709	13.2618	12.0955	3.85077	1e-20	3.52e-19	>LE01Gene10519	YL056_YEAST^YL056_YEAST^Q:327-1202,H:1-296^24.2%ID^E:1.5e-06^RecName: Full=Uncharacterized protein YLL056C	PF01370.20^Epimerase^NAD dependent epimerase/dehydratase family^3-219^E:2.9e-06	.	.	.	GO:0003824^molecular_function^catalytic activity`GO:0050662^molecular_function^coenzyme binding
>LE01Gene06439	4.91275	0	3.71206	7.10451	8.11583	7.5059	3.84839	1.45e-05	4.86e-05	>LE01Gene06439	TTR_PSEAJ^TTR_PSEAJ^Q:489-782,H:73-170^39.8%ID^E:1.8e-13^RecName: Full=Acetyltransferase	PF00583.24^Acetyltransf_1^Acetyltransferase (GNAT) family^112-193^E:5.5e-11`PF13508.6^Acetyltransf_7^Acetyltransferase (GNAT) domain^120-194^E:1.4e-07`PF13673.6^Acetyltransf_10^Acetyltransferase (GNAT) domain^135-198^E:1.4e-09	.	KEGG:ag:CAA35037`KO:K19113	GO:0016746^molecular_function^transferase activity, transferring acyl groups	.
>LE01Gene12203	3.28342	5.23336	5.18216	9.32427	8.52074	7.24608	3.84315	1.17e-07	5.6e-07	>LE01Gene12203	AMYB_ASPAW^AMYB_ASPAW^Q:1205-2719,H:3-498^44.5%ID^E:1.3e-116^RecName: Full=Alpha-amylase B	.	.	.	.	.
>LE01Gene02743	3.28342	2.54057	4.09931	6.93834	7.72577	6.50563	3.83678	2.76e-16	5.31e-15	>LE01Gene02743	.	PF03229.12^Alpha_GJ^Alphavirus glycoprotein J^162-240^E:0.00039	.	.	.	GO:0019050^biological_process^suppression by virus of host apoptotic process
>LE01Gene11899	4.41856	3.94996	5.14151	7.93797	8.98427	7.8213	3.82019	8.69e-16	1.55e-14	>LE01Gene11899	.	.	.	.	.	.
>LE01Gene11861	12.0986	12.4429	11.5556	15.9372	16.5128	14.6242	3.80776	7.62e-18	1.79e-16	>LE01Gene11861	.	.	.	.	.	.
>LE01Gene02631	8.23342	8.13162	8.24616	11.4443	12.6945	11.4534	3.79189	4.37e-07	1.9e-06	>LE01Gene02631	LIP3_ARTBC^LIP3_ARTBC^Q:358-1824,H:5-540^30.7%ID^E:5.5e-50^RecName: Full=Probable secreted lipase ARB_02369 {ECO:0000305}	PF00135.27^COesterase^Carboxylesterase family^20-485^E:7.4e-87`PF07859.12^Abhydrolase_3^alpha/beta hydrolase fold^123-225^E:7.5e-07	COG2272^Carboxylesterase	KEGG:abe:ARB_02369	GO:0005576^cellular_component^extracellular region`GO:0004806^molecular_function^triglyceride lipase activity`GO:0006629^biological_process^lipid metabolic process	GO:0016787^molecular_function^hydrolase activity
>LE01Gene06939	8.43706	9.20875	9.59376	12.7518	13.356	12.6099	3.79034	1.91e-13	2.34e-12	>LE01Gene06939	A2965_ARTBC^A2965_ARTBC^Q:217-1938,H:2-592^39%ID^E:8.2e-96^RecName: Full=Putative amidase ARB_02965 {ECO:0000305}	PF01425.20^Amidase^Amidase^69-381^E:1.5e-69	COG0154^Allows the formation of correctly charged Gln-tRNA(Gln) through the transamidation of misacylated Glu-tRNA(Gln) in organisms which lack glutaminyl-tRNA synthetase. The reaction takes place in the presence of glutamine and ATP through an activated gamma-phospho-Glu-tRNA(Gln) (By similarity)	KEGG:abe:ARB_02965`KO:K01426	GO:0005576^cellular_component^extracellular region`GO:0016787^molecular_function^hydrolase activity	.
>LE01Gene00322	9.24494	8.68478	8.443	13.2939	12.519	11.5194	3.78902	3.88e-14	5.37e-13	>LE01Gene00322	RNC_BACAA^RNC_BACAA^Q:212-595,H:32-162^23.2%ID^E:3.7e-05^RecName: Full=Ribonuclease 3 {ECO:0000255|HAMAP-Rule:MF_00104}	PF00035.25^dsrm^Double-stranded RNA binding motif^217-274^E:1.8e-07	.	.	.	.
>LE01Gene05696	3.42053	2.27934	0	4.66272	5.92883	6.70448	3.7835	6.71e-05	0.000199282	>LE01Gene05696	.	.	.	.	.	.
>LE01Gene06707	5.44997	4.75586	4.96637	7.88184	9.60545	8.43891	3.7788	2.88e-17	6.14e-16	>LE01Gene06707	.	PF12796.6^Ank_2^Ankyrin repeats (3 copies)^590-671^E:2.3e-08`PF13637.5^Ank_4^Ankyrin repeats (many copies)^591-630^E:8.4e-05`PF13857.5^Ank_5^Ankyrin repeats (many copies)^596-649^E:1.8e-06`PF13637.5^Ank_4^Ankyrin repeats (many copies)^612-663^E:1.6e-07`PF00023.29^Ank^Ankyrin repeat^613-639^E:0.024`PF12796.6^Ank_2^Ankyrin repeats (3 copies)^645-703^E:2.5e-06`PF13637.5^Ank_4^Ankyrin repeats (many c…	.	.	.	GO:0005515^molecular_function^protein binding
>LE01Gene06703	7.34973	7.84766	7.64187	11.1704	11.8115	11.0836	3.77263	5.66e-22	2.36e-20	>LE01Gene06703	OMT2_PHACR^OMT2_PHACR^Q:64-1344,H:16-445^35.7%ID^E:2e-62^RecName: Full=3-O-methyltransferase 2 {ECO:0000303|PubMed:26672450}	PF00891.17^Methyltransf_2^O-methyltransferase^219-433^E:1.6e-28`PF05175.13^MTS^Methyltransferase small domain^261-333^E:0.00017`PF13847.5^Methyltransf_31^Methyltransferase domain^264-371^E:8.7e-10`PF13649.5^Methyltransf_25^Methyltransferase domain^265-361^E:1.2e-08`PF08242.11^Methyltransf_12^Methyltransferase domain^267-363^E:4.8e-09`PF08241.11^Methyltransf_11^Methyltransferase domain^267-366^E:4…	.	.	GO:0008171^molecular_function^O-methyltransferase activity`GO:0046274^biological_process^lignin catabolic process	GO:0008171^molecular_function^O-methyltransferase activity`GO:0008168^molecular_function^methyltransferase activity
>LE01Gene11106	2.77071	5.34018	2.332	7.35594	7.23648	8.50603	3.76983	7.05e-09	4.1e-08	>LE01Gene11106	DEOC_STAES^DEOC_STAES^Q:160-627,H:7-135^44.2%ID^E:4.1e-28^RecName: Full=Deoxyribose-phosphate aldolase {ECO:0000255|HAMAP-Rule:MF_00114}	PF01791.8^DeoC^DeoC/LacD family aldolase^53-165^E:1.6e-05	COG0274^Catalyzes a reversible aldol reaction between acetaldehyde and D-glyceraldehyde 3-phosphate to generate 2-deoxy- D-ribose 5-phosphate (By similarity)	KEGG:sep:SE1736`KO:K01619	GO:0005737^cellular_component^cytoplasm`GO:0004139^molecular_function^deoxyribose-phosphate aldolase activity`GO:0009264^biological_process^deoxyribonucleotide catabolic process`GO:0046386^biological_process^deoxyribose phosphate catabolic process	GO:0016829^molecular_function^lyase activity
>LE01Gene05089	6.22451	6.09708	6.40475	10.5705	10.2862	8.22149	3.76836	1.74e-12	1.8e-11	>LE01Gene05089	COX1_COPC7^COX1_COPC7^Q:325-1575,H:65-510^33.9%ID^E:1.1e-63^RecName: Full=Cytochrome P450 monooxygenase COX1 {ECO:0000303|PubMed:19400802}	PF00067.21^p450^Cytochrome P450^9-389^E:2.9e-37	COG2124^Cytochrome p450	KEGG:cci:CC1G_03562	GO:0016021^cellular_component^integral component of membrane`GO:0020037^molecular_function^heme binding`GO:0005506^molecular_function^iron ion binding`GO:0004497^molecular_function^monooxygenase activity`GO:0016705^molecular_function^oxidoreductase activity, acting on paired donors, with incorporation or reduction of molecular oxygen	GO:0005506^molecular_function^iron ion binding`GO:0016705^molecular_function^oxidoreductase activity, acting on paired donors, with incorporation or reduction of molecular oxygen`GO:0020037^molecular_function^heme binding`GO:0055114^biological_process^oxidation-reduction process
>LE01Gene06377	6.12768	7.56155	6.36998	10.3168	11.073	10.2078	3.76677	3.69e-16	6.95e-15	>LE01Gene06377	.	.	.	.	.	.
>LE01Gene13668	9.17881	10.014	10.1302	13.3772	14.1295	13.0642	3.76477	4.03e-22	1.71e-20	>LE01Gene13668	YAKC_SCHPO^YAKC_SCHPO^Q:1172-1750,H:148-340^54.9%ID^E:2.2e-58^RecName: Full=Aldo-keto reductase yakc [NADP(+)]	PF00248.20^Aldo_ket_red^Aldo/keto reductase family^15-141^E:8.8e-31	.	KEGG:spo:SPAC1F7.12	GO:0005829^cellular_component^cytosol`GO:0005634^cellular_component^nucleus`GO:0016614^molecular_function^oxidoreductase activity, acting on CH-OH group of donors	.
>LE01Gene09676	7.70555	8.0605	7.92542	11.0983	12.4496	10.9263	3.76471	9.09e-19	2.47e-17	>LE01Gene09676	YFZ3_SCHPO^YFZ3_SCHPO^Q:218-1138,H:12-319^39.7%ID^E:3.1e-54^RecName: Full=AB hydrolase superfamily protein C1039.03	PF10340.8^Say1_Mug180^Steryl acetyl hydrolase^147-360^E:3.1e-07`PF07859.12^Abhydrolase_3^alpha/beta hydrolase fold^159-374^E:1.8e-60	.	KEGG:spo:SPAC1039.03	GO:0005829^cellular_component^cytosol`GO:0005634^cellular_component^nucleus`GO:0016787^molecular_function^hydrolase activity`GO:0009056^biological_process^catabolic process	GO:0016787^molecular_function^hydrolase activity
>LE01Gene01249	6.65801	5.83013	5.36983	9.049	9.98009	10.0746	3.73557	4.96e-14	6.75e-13	>LE01Gene01249	IFRH_SOLTU^IFRH_SOLTU^Q:85-828,H:12-249^24.8%ID^E:0.00022^RecName: Full=Isoflavone reductase homolog	PF05368.12^NmrA^NmrA-like family^29-129^E:1.7e-07`PF13460.5^NAD_binding_10^NAD(P)H-binding^29-123^E:3.1e-06	.	.	.	.
>LE01Gene11653	7.62979	8.79843	9.71474	12.624	12.3326	13.0038	3.7327	1.94e-12	1.99e-11	>LE01Gene11653	A1345_ARTBC^A1345_ARTBC^Q:269-1591,H:74-533^31.8%ID^E:9.2e-59^RecName: Full=Probable extracellular serine carboxypeptidase {ECO:0000305}	PF05577.11^Peptidase_S28^Serine carboxypeptidase S28^65-493^E:7e-47	.	.	.	GO:0008236^molecular_function^serine-type peptidase activity`GO:0006508^biological_process^proteolysis
>LE01Gene08871	0	3.27392	4.0118	6.54901	7.28198	6.09042	3.72951	6.56e-09	3.84e-08	>LE01Gene08871	.	.	.	.	.	.
>LE01Gene04822	7.49655	7.56155	7.96673	10.2183	11.9934	11.4587	3.71199	1.08e-17	2.47e-16	>LE01Gene04822	DTXS3_METRA^DTXS3_METRA^Q:13-1023,H:25-369^53.8%ID^E:4.4e-101^RecName: Full=Aldo-keto reductase dtxS3 {ECO:0000305}	PF00248.20^Aldo_ket_red^Aldo/keto reductase family^21-332^E:2.4e-69	.	KEGG:maj:MAA_10045	GO:0016491^molecular_function^oxidoreductase activity	.
>LE01Gene11631	6.18655	6.23266	5.68476	9.52634	10.3697	8.85398	3.68085	6e-14	8.05e-13	>LE01Gene11631	PRLL_FUNXX^PRLL_FUNXX^Q:674-1888,H:71-487^29%ID^E:3.7e-51^RecName: Full=MFS transporter prlL {ECO:0000303|PubMed:25226362}	.	.	.	.	.
>LE01Gene04028	6.80302	8.55773	8.41768	11.1161	12.6469	10.9339	3.67746	3.78e-12	3.69e-11	>LE01Gene04028	HNM1_YEAST^HNM1_YEAST^Q:143-1630,H:29-518^29.5%ID^E:1.7e-58^RecName: Full=Choline transport protein	PF13520.5^AA_permease_2^Amino acid permease^96-526^E:2.6e-43`PF00324.20^AA_permease^Amino acid permease^100-537^E:1.8e-24	COG0531^amino acid	KEGG:abe:ARB_07840`KO:K19564	GO:0016021^cellular_component^integral component of membrane`GO:0022857^molecular_function^transmembrane transporter activity	GO:0022857^molecular_function^transmembrane transporter activity`GO:0055085^biological_process^transmembrane transport`GO:0016020^cellular_component^membrane
>LE01Gene06701	1.55654	3.41093	0	5.71329	6.21819	4.56829	3.6648	4.36e-05	0.00013431	>LE01Gene06701	HETE1_PODAS^HETE1_PODAS^Q:562-1590,H:286-580^22.3%ID^E:1.2e-05^RecName: Full=Vegetative incompatibility protein HET-E-1	PF05729.11^NACHT^NACHT domain^197-384^E:2.3e-06	.	.	.	.
>LE01Gene03958	8.08143	9.01006	8.01816	11.6888	12.9378	10.9521	3.65393	2.3e-17	4.97e-16	>LE01Gene03958	.	.	.	.	.	.
>LE01Gene11943	5.60188	4.27121	5.05659	8.77474	8.92527	8.28498	3.65166	8.73e-25	5.29e-23	>LE01Gene11943	.	.	.	.	.	.
>LE01Gene10247	9.07877	9.11658	9.26286	13.0383	12.9106	12.3689	3.64789	1.01e-19	3.13e-18	>LE01Gene10247	MX_CTEID^MX_CTEID^Q:376-2631,H:4-622^25.2%ID^E:1.9e-47^RecName: Full=Interferon-induced GTP-binding protein Mx	PF01926.22^MMR_HSR1^50S ribosome-binding GTPase^73-259^E:6.7e-05`PF00350.22^Dynamin_N^Dynamin family^74-282^E:2.5e-28`PF01031.19^Dynamin_M^Dynamin central region^299-610^E:4.7e-30`PF02212.17^GED^Dynamin GTPase effector domain^693-780^E:4.9e-10	.	.	GO:0005829^cellular_component^cytosol`GO:0005634^cellular_component^nucleus`GO:0005525^molecular_function^GTP binding`GO:0003924^molecular_function^GTPase activity`GO:0034340^biological_process^response to type I interferon	GO:0005525^molecular_function^GTP binding`GO:0003924^molecular_function^GTPase activity
>LE01Gene01248	9.65765	8.00205	9.72681	13.0474	12.9142	12.9039	3.64341	6.42e-19	1.79e-17	>LE01Gene01248	YP54_SCHPO^YP54_SCHPO^Q:200-1147,H:59-376^43.4%ID^E:3.3e-72^RecName: Full=Putative alpha-ketoglutarate-dependent sulfonate dioxygenase	PF02668.15^TauD^Taurine catabolism dioxygenase TauD, TfdA family^86-350^E:2.3e-59	.	.	GO:0005737^cellular_component^cytoplasm`GO:0046872^molecular_function^metal ion binding`GO:0000907^molecular_function^sulfonate dioxygenase activity`GO:0000908^molecular_function^taurine dioxygenase activity`GO:0046306^biological_process^alkanesulfonate catabolic process`GO:0044273^biological_process^sulfur compound catabolic process	GO:0016491^molecular_function^oxidoreductase activity`GO:0055114^biological_process^oxidation-reduction process
>LE01Gene10796	7.65085	8.24594	7.49633	11.2086	11.9634	11.0787	3.64259	2.22e-17	4.85e-16	>LE01Gene10796	.	PF12697.6^Abhydrolase_6^Alpha/beta hydrolase family^32-330^E:3.6e-06	.	.	.	.
>LE01Gene03817	4.35154	4.27121	4.09931	5.55	8.1358	8.43891	3.64092	1.69e-05	5.6e-05	>LE01Gene03817	.	.	.	.	.	.
>LE01Gene12750	7.31497	7.85368	7.80694	10.3596	11.3056	11.8713	3.63338	6.28e-24	3.4e-22	>LE01Gene12750	YJ7D_SCHPO^YJ7D_SCHPO^Q:645-2129,H:42-520^31.7%ID^E:4.6e-66^RecName: Full=Uncharacterized transporter C757.13	PF07690.15^MFS_1^Major Facilitator Superfamily^61-426^E:2.4e-24	.	KEGG:spo:SPCC757.13	GO:0005783^cellular_component^endoplasmic reticulum`GO:0016021^cellular_component^integral component of membrane`GO:0071916^molecular_function^dipeptide transmembrane transporter activity`GO:0035442^biological_process^dipeptide transmembrane transport	GO:0055085^biological_process^transmembrane transport`GO:0016021^cellular_component^integral component of membrane
>LE01Gene09736	9.69867	8.3938	9.31177	13.6693	12.5075	11.6697	3.61849	6.38e-16	1.15e-14	>LE01Gene09736	.	PF00704.27^Glyco_hydro_18^Glycosyl hydrolases family 18^174-412^E:2.1e-13	.	.	.	GO:0005975^biological_process^carbohydrate metabolic process
>LE01Gene06474	7.66472	7.84766	8.00688	11.407	11.8741	10.9423	3.61689	2.6e-15	4.36e-14	>LE01Gene06474	.	.	.	.	.	.
>LE01Gene05933	3.1319	3.12252	2.59545	5.97173	5.59561	7.16533	3.61487	0.000166429	0.000456635	>LE01Gene05933	UFAA1_MYCTU^UFAA1_MYCTU^Q:896-1807,H:148-425^30.5%ID^E:1.8e-28^RecName: Full=Tuberculostearic acid methyltransferase UfaA1 {ECO:0000305}	.	.	.	.	.
>LE01Gene13525	4.65927	2.54057	0	7.03416	7.38567	5.95285	3.61372	3.04e-09	1.88e-08	>LE01Gene13525	.	.	.	.	.	.
>LE01Gene11817	7.96855	7.09669	8.33897	12.2037	10.7923	11.0067	3.59319	2.1e-13	2.56e-12	>LE01Gene11817	YGD3_SCHPO^YGD3_SCHPO^Q:368-1675,H:27-451^42.3%ID^E:2e-93^RecName: Full=Uncharacterized aminotransferase C1771.03c	PF00202.20^Aminotran_3^Aminotransferase class-III^37-467^E:1.3e-79	.	KEGG:spo:SPBC1773.03c	GO:0005829^cellular_component^cytosol`GO:0030170^molecular_function^pyridoxal phosphate binding`GO:0008483^molecular_function^transaminase activity	GO:0008483^molecular_function^transaminase activity`GO:0030170^molecular_function^pyridoxal phosphate binding
>LE01Gene11289	9.9572	9.47802	10.0027	13.0052	13.0043	14.0103	3.59265	3.26e-12	3.23e-11	>LE01Gene11289	.	.	.	.	.	.
>LE01Gene10245	8.00171	8.50895	8.48828	11.1977	12.9057	10.7755	3.59134	7.88e-10	5.36e-09	>LE01Gene10245	BVMO_PARL1^BVMO_PARL1^Q:135-1421,H:19-446^55.5%ID^E:1.9e-145^RecName: Full=Baeyer-Villiger monooxygenase	.	.	.	.	.
>LE01Gene14219	6.6158	6.21406	7.1924	10.5837	10.1554	10.0621	3.56811	1.32e-18	3.5e-17	>LE01Gene14219	AFLM_ASPPU^AFLM_ASPPU^Q:116-850,H:7-259^43%ID^E:1.3e-44^RecName: Full=Versicolorin reductase 1 {ECO:0000305|PubMed:1339261}	PF00106.24^adh_short^short chain dehydrogenase^12-202^E:2.5e-42`PF08659.9^KR^KR domain^15-157^E:7.3e-10`PF01370.20^Epimerase^NAD dependent epimerase/dehydratase family^15-215^E:1.8e-05`PF13561.5^adh_short_C2^Enoyl-(Acyl carrier protein) reductase^18-254^E:1.4e-57	.	.	GO:0016491^molecular_function^oxidoreductase activity	GO:0003824^molecular_function^catalytic activity`GO:0050662^molecular_function^coenzyme binding
>LE01Gene00956	7.25205	8.11668	7.75399	10.9784	11.6302	11.2365	3.56278	4.28e-51	3.34e-48	>LE01Gene00956	.	.	.	.	.	.
>LE01Gene11070	6.02389	5.87819	5.71278	8.62208	9.89478	9.4624	3.56267	1.18e-11	1.07e-10	>LE01Gene11070	USTYA_ASPFN^USTYA_ASPFN^Q:226-612,H:70-212^27.5%ID^E:4e-10^RecName: Full=Oxidase ustYa {ECO:0000303|PubMed:24841822}	PF11807.7^DUF3328^Domain of unknown function (DUF3328)^85-185^E:5.5e-13	.	.	.	GO:0043386^biological_process^mycotoxin biosynthetic process
>LE01Gene06512	8.42895	8.38135	8.49636	12.2054	12.0639	11.6424	3.55729	6.87e-29	7.65e-27	>LE01Gene06512	BUDC_KLEPN^BUDC_KLEPN^Q:88-843,H:4-256^40.9%ID^E:3.5e-47^RecName: Full=Diacetyl reductase [(S)-acetoin forming]	PF08659.9^KR^KR domain^29-146^E:2.3e-09`PF00106.24^adh_short^short chain dehydrogenase^30-225^E:3.5e-52`PF13561.5^adh_short_C2^Enoyl-(Acyl carrier protein) reductase^35-278^E:1.3e-60	ENOG410XNW1^)-reductase	.	GO:0052588^molecular_function^diacetyl reductase ((S)-acetoin forming) activity`GO:0045150^biological_process^acetoin catabolic process	.
>LE01Gene10182	7.13736	6.26917	5.79371	10.4288	10.1602	9.35954	3.55409	3.13e-12	3.11e-11	>LE01Gene10182	.	.	.	.	.	.
>LE01Gene02666	9.32135	9.3042	9.58999	12.679	13.0471	13.094	3.54234	2.2e-19	6.58e-18	>LE01Gene02666	YBIU_ECOLI^YBIU_ECOLI^Q:122-1399,H:9-421^30.5%ID^E:3.5e-46^RecName: Full=Uncharacterized protein YbiU	PF07350.11^DUF1479^Protein of unknown function (DUF1479)^6-423^E:2.6e-130	ENOG410XRA8^DUF1479 domain protein	KEGG:ecj:JW0805`KEGG:eco:b0821	.	.
>LE01Gene08708	8.24731	8.76367	8.45549	12.1884	12.3551	11.4261	3.54191	5.57e-18	1.33e-16	>LE01Gene08708	RDR1_ARATH^RDR1_ARATH^Q:1553-3466,H:360-948^30.4%ID^E:4e-60^RecName: Full=RNA-dependent RNA polymerase 1	.	.	.	.	.
>LE01Gene04254	3.66094	4.85527	0	7.28846	7.88759	6.13351	3.53457	1.65e-08	9.08e-08	>LE01Gene04254	.	PF00931.21^NB-ARC^NB-ARC domain^98-327^E:3.5e-07`PF13374.5^TPR_10^Tetratricopeptide repeat^503-539^E:0.0025`PF13424.5^TPR_12^Tetratricopeptide repeat^505-565^E:1.4e-07`PF13424.5^TPR_12^Tetratricopeptide repeat^547-615^E:4.5e-10`PF13374.5^TPR_10^Tetratricopeptide repeat^549-582^E:0.0017`PF13374.5^TPR_10^Tetratricopeptide repeat^583-624^E:3.1e-07`PF13374.5^TPR_10^Tetratricopeptide repeat^625-666^E:…	.	.	.	GO:0043531^molecular_function^ADP binding
>LE01Gene13028	6.36706	7.28675	5.76724	9.86861	10.6965	9.57022	3.5294	3.96e-12	3.86e-11	>LE01Gene13028	.	PF00561.19^Abhydrolase_1^alpha/beta hydrolase fold^35-135^E:9.7e-09`PF12697.6^Abhydrolase_6^Alpha/beta hydrolase family^37-275^E:2.9e-07	.	.	.	.
>LE01Gene08139	6.00221	5.85436	5.29766	9.50792	9.88302	7.26558	3.52574	9.21e-06	3.19e-05	>LE01Gene08139	.	.	.	.	.	.
>LE01Gene12866	10.7146	10.4877	10.5633	13.894	14.7139	13.4362	3.52287	2.56e-12	2.59e-11	>LE01Gene12866	AORSN_ASPOR^AORSN_ASPOR^Q:734-2668,H:3-652^40.1%ID^E:7.1e-126^RecName: Full=Aorsin	.	.	.	.	.
>LE01Gene07740	6.49678	6.21406	6.07848	10.0438	9.59827	9.64844	3.5208	2.69e-21	1.01e-19	>LE01Gene07740	.	.	.	.	.	.
>LE01Gene10240	8.6119	8.66779	9.05968	12.5588	12.4957	11.7266	3.51576	7.86e-16	1.4e-14	>LE01Gene10240	HEXO2_ARATH^HEXO2_ARATH^Q:285-1994,H:8-571^34.7%ID^E:1.7e-83^RecName: Full=Beta-hexosaminidase 2	.	.	.	.	.
>LE01Gene00975	10.6637	11.366	10.5966	14.0829	15.1913	13.4155	3.49982	4.88e-18	1.19e-16	>LE01Gene00975	.	.	.	.	.	.
>LE01Gene04901	3.28342	2.27934	3.81904	6.83571	6.21819	6.69012	3.49765	3.08e-15	5.11e-14	>LE01Gene04901	VEL_LACBS^VEL_LACBS^Q:421-1119,H:50-305^37%ID^E:6.6e-33^RecName: Full=Probable velvet family sexual development regulator LACBIDRAFT_317102 {ECO:0000305}	PF11754.7^Velvet^Velvet factor^98-305^E:1.3e-21	ENOG410YU2T^Velvet factor	KEGG:lbc:LACBIDRAFT_317102	GO:0005634^cellular_component^nucleus`GO:0006355^biological_process^regulation of transcription, DNA-templated`GO:0030435^biological_process^sporulation resulting in formation of a cellular spore`GO:0006351^biological_process^transcription, DNA-templated	.
>LE01Gene09078	7.64387	7.97468	8.11057	10.8686	11.9223	11.2378	3.49324	5.2e-22	2.18e-20	>LE01Gene09078	.	.	.	.	.	.
>LE01Gene12026	4.91275	5.56238	4.87013	7.60508	8.47445	9.27065	3.49035	1.26e-07	5.99e-07	>LE01Gene12026	.	.	.	.	.	.
>LE01Gene05709	7.13736	7.70836	7.44714	10.8714	11.3639	10.3344	3.47475	1.93e-15	3.3e-14	>LE01Gene05709	EST_ACILW^EST_ACILW^Q:940-1716,H:69-294^26.3%ID^E:1.7e-10^RecName: Full=Esterase	.	.	.	.	.
>LE01Gene13764	7.96295	8.48587	8.35684	11.7418	11.9093	11.5868	3.47106	5.52e-21	1.99e-19	>LE01Gene13764	BETA_PSE14^BETA_PSE14^Q:1352-3019,H:7-535^32.5%ID^E:5e-67^RecName: Full=Oxygen-dependent choline dehydrogenase {ECO:0000255|HAMAP-Rule:MF_00750}	.	.	.	.	.
>LE01Gene11793	8.81523	10.8751	12.9452	15.1908	15.2562	15.156	3.46855	1.83e-06	7.25e-06	>LE01Gene11793	SED2_ASPFU^SED2_ASPFU^Q:25-1773,H:13-599^35.7%ID^E:6.7e-84^RecName: Full=Tripeptidyl-peptidase sed2	PF09286.10^Pro-kuma_activ^Pro-kumamolisin, activation domain^42-180^E:1.2e-28`PF00082.21^Peptidase_S8^Subtilase family^294-528^E:3.7e-09	.	KEGG:afm:AFUA_4G03490`KO:K01279	GO:0005615^cellular_component^extracellular space`GO:0046872^molecular_function^metal ion binding`GO:0004252^molecular_function^serine-type endopeptidase activity`GO:0008240^molecular_function^tripeptidyl-peptidase activity`GO:0009405^biological_process^pathogenesis	GO:0008236^molecular_function^serine-type peptidase activity`GO:0004252^molecular_function^serine-type endopeptidase activity`GO:0006508^biological_process^proteolysis
>LE01Gene05328	8.15206	8.23214	8.07323	10.8613	12.4765	10.8444	3.46384	1.18e-10	9.12e-10	>LE01Gene05328	PST2_YEAST^PST2_YEAST^Q:126-716,H:2-197^62.9%ID^E:1.4e-70^RecName: Full=Protoplast secreted protein 2	PF03358.14^FMN_red^NADPH-dependent FMN reductase^56-183^E:1.4e-09`PF02525.16^Flavodoxin_2^Flavodoxin-like fold^56-173^E:8.7e-07	.	KEGG:sce:YDR032C	GO:0005576^cellular_component^extracellular region`GO:0010181^molecular_function^FMN binding`GO:0042802^molecular_function^identical protein binding`GO:0003955^molecular_function^NAD(P)H dehydrogenase (quinone) activity	GO:0016491^molecular_function^oxidoreductase activity
>LE01Gene09631	1.96799	4.11951	4.09931	6.82385	7.24569	6.97709	3.45487	2.96e-11	2.52e-10	>LE01Gene09631	HETE1_PODAS^HETE1_PODAS^Q:236-1393,H:277-704^21.8%ID^E:3.6e-10^RecName: Full=Vegetative incompatibility protein HET-E-1	.	.	.	.	.
>LE01Gene06475	6.38392	6.42291	6.83265	9.69218	10.4556	9.70309	3.44988	5.62e-18	1.34e-16	>LE01Gene06475	.	.	.	.	.	.
>LE01Gene04964	8.62615	8.99651	8.90434	11.7918	12.9641	11.7601	3.44027	4.79e-19	1.36e-17	>LE01Gene04964	.	.	.	.	.	.
>LE01Gene06692	2.28775	0	3.18111	5.57853	6.25517	2.8475	3.43708	9.93e-06	3.43e-05	>LE01Gene06692	.	.	.	.	.	.
>LE01Gene11048	9.52896	9.48191	10.0224	13.3367	13.5165	12.2458	3.4339	6.85e-17	1.41e-15	>LE01Gene11048	HS12B_HUMAN^HS12B_HUMAN^Q:245-886,H:45-250^25.6%ID^E:7.3e-05^RecName: Full=Heat shock 70 kDa protein 12B	.	.	.	.	.
>LE01Gene05046	3.1319	4.85527	2.59545	7.65282	6.73257	7.09077	3.43257	4.93e-07	2.13e-06	>LE01Gene05046	.	.	.	.	.	.
>LE01Gene07044	5.28017	3.53605	5.33419	7.81747	8.61265	8.35036	3.42338	2.83e-21	1.07e-19	>LE01Gene07044	.	.	.	.	.	.
>LE01Gene04284	8.28372	8.27316	8.42617	10.8915	12.6575	10.9047	3.41694	5.99e-12	5.67e-11	>LE01Gene04284	GNL_ZYMMO^GNL_ZYMMO^Q:1087-1605,H:149-317^29.1%ID^E:1e-13^RecName: Full=Gluconolactonase	PF08450.11^SGL^SMP-30/Gluconolaconase/LRE-like region^169-382^E:6.3e-24`PF03088.15^Str_synth^Strictosidine synthase^221-292^E:1.2e-05	.	KEGG:zmo:ZMO1649`KO:K01053	GO:0042597^cellular_component^periplasmic space`GO:0004341^molecular_function^gluconolactonase activity`GO:0046178^biological_process^D-gluconate biosynthetic process	GO:0016844^molecular_function^strictosidine synthase activity`GO:0009058^biological_process^biosynthetic process
>LE01Gene12434	0	3.65118	0	3.61221	6.39427	4.90312	3.40798	0.00301748	0.00643983	>LE01Gene12434	.	.	.	.	.	.
>LE01Gene02007	2.77071	2.95335	2.81814	4.99454	6.96237	5.43795	3.4025	1.77e-08	9.64e-08	>LE01Gene02007	.	.	.	.	.	.
>LE01Gene05888	2.96258	0	0	4.43203	5.03969	4.36635	3.39932	9.76e-05	0.000280617	>LE01Gene05888	.	.	.	.	.	.
>LE01Gene09038	8.83069	9.27083	8.83592	12.3993	12.6331	12.0725	3.39455	2.19e-22	9.43e-21	>LE01Gene09038	CUPR1_ARTBC^CUPR1_ARTBC^Q:988-1434,H:1-141^30.9%ID^E:4.6e-13^RecName: Full=Probable GPI-anchored cupredoxin ARB_05732-1 {ECO:0000305}	.	.	.	.	.
>LE01Gene03818	4.81663	4.19735	3.71206	7.42827	7.65835	7.8014	3.38996	1.2e-10	9.21e-10	>LE01Gene03818	.	.	.	.	.	.
>LE01Gene11071	7.92311	8.34333	7.82631	10.8865	12.0262	11.1235	3.38906	2.87e-21	1.08e-19	>LE01Gene11071	.	PF09792.8^But2^Ubiquitin 3 binding protein But2 C-terminal domain^144-253^E:2.8e-09	.	.	.	.
>LE01Gene09677	7.79024	7.70836	7.41339	10.7092	11.7006	10.2982	3.38761	2.23e-17	4.85e-16	>LE01Gene09677	.	.	.	.	.	.
>LE01Gene13768	6.34999	6.50173	6.68488	9.93493	9.87413	9.86045	3.38669	1.16e-73	3.39e-70	>LE01Gene13768	.	.	.	.	.	.
>LE01Gene11541	6.43338	4.90251	4.33388	8.2795	9.71568	7.95342	3.38618	3.6e-08	1.86e-07	>LE01Gene11541	OMT2_PHACR^OMT2_PHACR^Q:74-1309,H:11-423^42%ID^E:2.1e-87^RecName: Full=3-O-methyltransferase 2 {ECO:0000303|PubMed:26672450}	PF00891.17^Methyltransf_2^O-methyltransferase^199-385^E:1.5e-20	.	.	GO:0008171^molecular_function^O-methyltransferase activity`GO:0046274^biological_process^lignin catabolic process	GO:0008171^molecular_function^O-methyltransferase activity
>LE01Gene12938	9.63493	8.81704	9.35686	12.7043	13.3206	11.5189	3.38503	1.96e-18	5.04e-17	>LE01Gene12938	.	.	.	.	.	.
>LE01Gene11942	5.57275	4.03722	5.29766	8.03894	8.98152	8.13402	3.38312	1.8e-11	1.58e-10	>LE01Gene11942	.	.	.	.	.	.
>LE01Gene06792	7.77753	7.4063	7.45545	10.8445	11.0402	10.9	3.38147	4.1e-26	2.94e-24	>LE01Gene06792	.	.	.	.	.	.
>LE01Gene05669	9.48859	10.0874	10.2269	13.2831	13.6079	13.0839	3.3746	1.61e-29	1.96e-27	>LE01Gene05669	OPT3_ARATH^OPT3_ARATH^Q:1197-3260,H:34-705^28.9%ID^E:2.5e-77^RecName: Full=Oligopeptide transporter 3	.	.	.	.	.
>LE01Gene06096	5.16778	5.67551	4.65594	7.99729	8.81505	8.72961	3.36545	1.51e-15	2.61e-14	>LE01Gene06096	.	.	.	.	.	.
>LE01Gene01806	7.40035	7.06589	7.03485	9.88726	10.6872	10.846	3.36225	1.58e-24	9.31e-23	>LE01Gene01806	YLL3_SCHPO^YLL3_SCHPO^Q:949-1278,H:42-152^35.1%ID^E:2.8e-07^RecName: Full=Smr domain-containing protein C11H11.03c	PF01713.20^Smr^Smr domain^327-389^E:3.5e-09	.	.	.	.
>LE01Gene10302	8.0126	7.46256	8.63826	12.6272	10.0865	10.1328	3.36201	1.56e-08	8.61e-08	>LE01Gene10302	CHI2_RHIOL^CHI2_RHIOL^Q:842-1675,H:58-304^46.8%ID^E:4.1e-62^RecName: Full=Chitinase 2	.	.	.	.	.
>LE01Gene04963	3.76761	3.41093	3.01101	7.18093	6.79668	5.53756	3.35358	3.72e-14	5.18e-13	>LE01Gene04963	.	.	.	.	.	.
>LE01Gene02614	9.56269	9.81081	10.4832	12.4177	13.4527	13.8561	3.35348	2.14e-17	4.7e-16	>LE01Gene02614	CYNS_COPC7^CYNS_COPC7^Q:491-934,H:4-151^70.3%ID^E:9.2e-62^RecName: Full=Cyanate hydratase {ECO:0000255|HAMAP-Rule:MF_03139}	PF02560.13^Cyanate_lyase^Cyanate lyase C-terminal domain^95-161^E:1.1e-33	COG1513^Catalyzes the reaction of cyanate with bicarbonate to produce ammonia and carbon dioxide (By similarity)	KEGG:cci:CC1G_06180`KO:K01725	GO:0008824^molecular_function^cyanate hydratase activity`GO:0003677^molecular_function^DNA binding`GO:0009439^biological_process^cyanate metabolic process	GO:0009439^biological_process^cyanate metabolic process
>LE01Gene14052	9.33443	9.42642	9.63827	13.4035	12.5232	12.2269	3.33798	7.53e-10	5.15e-09	>LE01Gene14052	JLP1_YEAST^JLP1_YEAST^Q:104-1114,H:47-392^40.9%ID^E:7.9e-71^RecName: Full=Alpha-ketoglutarate-dependent sulfonate dioxygenase	.	.	.	.	.
>LE01Gene09020	5.28017	5.78041	6.2792	8.97044	9.5563	8.80817	3.33611	1.32e-23	6.78e-22	>LE01Gene09020	.	PF07428.10^Tri3^15-O-acetyltransferase Tri3^75-354^E:9.8e-14	.	.	.	GO:0016407^molecular_function^acetyltransferase activity`GO:0043386^biological_process^mycotoxin biosynthetic process
>LE01Gene08991	7.84608	8.43455	9.7857	9.9636	11.0723	13.4926	3.33359	0.000181196	0.00049402	>LE01Gene08991	YN93_YEAST^YN93_YEAST^Q:55-879,H:7-284^42.9%ID^E:9e-59^RecName: Full=Uncharacterized hydrolase YNR064C	PF00561.19^Abhydrolase_1^alpha/beta hydrolase fold^41-132^E:3.6e-13`PF12697.6^Abhydrolase_6^Alpha/beta hydrolase family^43-288^E:1.4e-09	.	KEGG:sce:YNR064C	GO:0052689^molecular_function^carboxylic ester hydrolase activity`GO:0004301^molecular_function^epoxide hydrolase activity`GO:0009636^biological_process^response to toxic substance	.
>LE01Gene06509	8.01801	8.22286	8.12628	10.4482	11.1778	12.1965	3.33225	1.1e-10	8.5e-10	>LE01Gene06509	EQXC_GIBF5^EQXC_GIBF5^Q:105-1139,H:1-351^33.4%ID^E:1e-43^RecName: Full=Trans-enoyl reductase {ECO:0000303|PubMed:28379186}	PF08240.11^ADH_N^Alcohol dehydrogenase GroES-like domain^30-95^E:0.00021`PF00107.25^ADH_zinc_N^Zinc-binding dehydrogenase^166-243^E:2.7e-17	.	.	GO:0000166^molecular_function^nucleotide binding`GO:0016491^molecular_function^oxidoreductase activity	GO:0055114^biological_process^oxidation-reduction process
>LE01Gene10198	6.65801	6.9804	7.21217	9.80664	11.0162	9.61652	3.33111	5.03e-12	4.83e-11	>LE01Gene10198	.	.	.	.	.	.
>LE01Gene06336	6.49678	6.70195	5.09967	10.0891	9.38545	8.99792	3.32759	9.5e-05	0.000273482	>LE01Gene06336	AG19_COCIM^AG19_COCIM^Q:37-450,H:12-145^45.4%ID^E:1.7e-23^RecName: Full=Heat-stable 19 kDa antigen	PF07249.11^Cerato-platanin^Cerato-platanin^30-150^E:7.2e-37	ENOG4111YGH^Allergenic cerato-platanin Asp F13	KEGG:cim:CIMG_01181	GO:0005576^cellular_component^extracellular region	.
>LE01Gene11826	3.54574	3.27392	4.09931	6.77538	6.96237	6.92898	3.3175	8.88e-12	8.18e-11	>LE01Gene11826	.	.	.	.	.	.
>LE01Gene03960	8.84903	10.1646	9.95215	12.5379	13.909	12.1175	3.3111	2.57e-10	1.88e-09	>LE01Gene03960	ALDH_AGABI^ALDH_AGABI^Q:300-1808,H:1-500^62.2%ID^E:6.1e-189^RecName: Full=Aldehyde dehydrogenase	PF00171.21^Aldedh^Aldehyde dehydrogenase family^31-495^E:1.4e-182	.	.	GO:0004029^molecular_function^aldehyde dehydrogenase (NAD) activity`GO:0043878^molecular_function^glyceraldehyde-3-phosphate dehydrogenase (NAD+) (non-phosphorylating) activity`GO:0006068^biological_process^ethanol catabolic process	GO:0016491^molecular_function^oxidoreductase activity`GO:0055114^biological_process^oxidation-reduction process
>LE01Gene06958	8.94876	9.26858	10.1341	12.6425	13.4439	12.1715	3.31104	1.18e-14	1.77e-13	>LE01Gene06958	YGD6_SCHPO^YGD6_SCHPO^Q:411-1385,H:17-345^44.6%ID^E:7.6e-67^RecName: Full=Zinc-type alcohol dehydrogenase-like protein C1773.06c	PF08240.11^ADH_N^Alcohol dehydrogenase GroES-like domain^34-98^E:7e-06`PF00107.25^ADH_zinc_N^Zinc-binding dehydrogenase^178-305^E:1.7e-27`PF13602.5^ADH_zinc_N_2^Zinc-binding dehydrogenase^210-343^E:8.3e-19	.	KEGG:spo:SPBC1773.06c	GO:0005829^cellular_component^cytosol`GO:0004022^molecular_function^alcohol dehydrogenase (NAD) activity`GO:0006066^biological_process^alcohol metabolic process`GO:0006091^biological_process^generation of precursor metabolites and energy	GO:0055114^biological_process^oxidation-reduction process
>LE01Gene03016	3.28342	4.19735	3.81904	7.1622	7.35193	6.40372	3.30845	2.62e-09	1.63e-08	>LE01Gene03016	.	PF00651.30^BTB^BTB/POZ domain^90-181^E:5.7e-07	.	.	.	GO:0005515^molecular_function^protein binding
>LE01Gene14481	3.1319	5.62005	5.43855	7.39657	9.0436	8.1287	3.30754	1.51e-09	9.77e-09	>LE01Gene14481	.	.	.	.	.	.
>LE01Gene01513	2.96258	0	0	4.55198	4.34545	4.74539	3.30395	2.99e-05	9.49e-05	>LE01Gene01513	.	.	.	.	.	.
>LE01Gene02328	7.11733	7.22304	7.70601	10.4835	11.3707	9.6222	3.29992	1.07e-11	9.77e-11	>LE01Gene02328	.	.	.	.	.	.
>LE01Gene06464	7.06599	7.18533	7.65637	11.3487	10.1529	9.88115	3.2928	7.49e-10	5.12e-09	>LE01Gene06464	YQK1_SCHPO^YQK1_SCHPO^Q:503-1282,H:19-275^31.7%ID^E:5.6e-26^RecName: Full=UPF0676 protein C1494.01	PF14226.5^DIOX_N^non-haem dioxygenase in morphine synthesis N-terminal^33-135^E:3.2e-17`PF03171.19^2OG-FeII_Oxy^2OG-Fe(II) oxygenase superfamily^195-299^E:3.6e-10	COG3491^2OGFe(II) oxygenase	KEGG:ath:AT2G38240	GO:0005829^cellular_component^cytosol`GO:0051213^molecular_function^dioxygenase activity`GO:0120091^molecular_function^jasmonic acid hydrolase`GO:0046872^molecular_function^metal ion binding`GO:0009813^biological_process^flavonoid biosynthetic process`GO:2000022^biological_process^regulation of jasmonic acid mediated signaling pathway	GO:0016491^molecular_function^oxidoreductase activity`GO:0055114^biological_process^oxidation-reduction process
>LE01Gene06678	7.54984	7.8716	7.20232	9.9294	11.425	10.8289	3.29129	3.44e-16	6.52e-15	>LE01Gene06678	LACP_KLULA^LACP_KLULA^Q:278-1804,H:66-582^27.2%ID^E:5.8e-51^RecName: Full=Lactose permease	PF00083.23^Sugar_tr^Sugar (and other) transporter^39-485^E:6.2e-83`PF07690.15^MFS_1^Major Facilitator Superfamily^41-434^E:1.7e-28	ENOG410XNQK^Transporter	KEGG:kla:KLLA0B14861g	GO:0016021^cellular_component^integral component of membrane`GO:0015293^molecular_function^symporter activity`GO:0008643^biological_process^carbohydrate transport	GO:0022857^molecular_function^transmembrane transporter activity`GO:0055085^biological_process^transmembrane transport`GO:0016021^cellular_component^integral component of membrane
>LE01Gene00343	6.20565	6.81739	6.09986	9.22173	10.5498	8.50192	3.28336	1e-10	7.85e-10	>LE01Gene00343	YOA5_SCHPO^YOA5_SCHPO^Q:847-1530,H:161-383^25.4%ID^E:5.3e-06^RecName: Full=Uncharacterized protein C557.05	.	.	.	.	.
>LE01Gene08223	9.61184	11.5358	11.0182	12.6494	15.0319	13.9694	3.26479	6.97e-11	5.59e-10	>LE01Gene08223	.	.	.	.	.	.
>LE01Gene07950	8.92014	8.57606	9.5729	12.1887	12.5984	12.2107	3.26419	1.78e-23	8.97e-22	>LE01Gene07950	I3ACR_SCHPO^I3ACR_SCHPO^Q:165-992,H:7-281^41.3%ID^E:1e-50^RecName: Full=NAD/NADP-dependent indole-3-acetaldehyde reductase	PF00248.20^Aldo_ket_red^Aldo/keto reductase family^52-305^E:1.5e-38	COG0656^reductase	KEGG:bsu:BSU33400	GO:0043892^molecular_function^methylglyoxal reductase (NADPH-dependent) activity	.
>LE01Gene13767	4.54393	4.53379	5.01219	7.98135	8.12585	7.62391	3.26354	3.47e-24	1.94e-22	>LE01Gene13767	.	.	.	.	.	.
>LE01Gene11335	8.73861	8.79843	9.21223	11.8227	12.3594	12.3307	3.26154	5.5e-20	1.78e-18	>LE01Gene11335	MFS1_CERS8^MFS1_CERS8^Q:399-2069,H:6-521^42.4%ID^E:1.5e-104^RecName: Full=MFS siderochrome iron transporter 1 {ECO:0000303|PubMed:28842536}	.	.	.	.	.
>LE01Gene11704	7.65085	6.66133	7.79388	11.1203	10.4426	10.4272	3.2602	3.9e-14	5.38e-13	>LE01Gene11704	ORSB_EMENI^ORSB_EMENI^Q:109-1038,H:3-325^48.6%ID^E:1.2e-84^RecName: Full=Decarboxylase orsB {ECO:0000303|PubMed:20174687}	PF04909.13^Amidohydro_2^Amidohydrolase^37-313^E:7.6e-43	.	KEGG:ani:AN7911.2	GO:0005829^cellular_component^cytosol`GO:0016831^molecular_function^carboxy-lyase activity`GO:0016787^molecular_function^hydrolase activity`GO:0046872^molecular_function^metal ion binding`GO:1900611^biological_process^F-9775A biosynthetic process`GO:1900614^biological_process^F-9775B biosynthetic process`GO:0019748^biological_process^secondary metabolic process	GO:0016787^molecular_function^hydrolase activity
>LE01Gene09317	9.57376	9.53535	9.91343	12.5214	13.0794	13.1467	3.25897	4.38e-40	1.65e-37	>LE01Gene09317	.	.	.	.	.	.
>LE01Gene13027	7.7647	7.49375	7.62723	11.1474	11.2217	9.99066	3.25893	2.06e-13	2.51e-12	>LE01Gene13027	MTR_NEUCR^MTR_NEUCR^Q:352-1413,H:44-395^32.8%ID^E:3.8e-46^RecName: Full=N amino acid transport system protein	PF01490.17^Aa_trans^Transmembrane amino acid transporter protein^36-381^E:3.9e-30	.	KEGG:ncr:NCU06619	GO:0016021^cellular_component^integral component of membrane`GO:0015171^molecular_function^amino acid transmembrane transporter activity`GO:0003333^biological_process^amino acid transmembrane transport	.
>LE01Gene04576	9.25184	8.60133	9.91946	12.0735	13.1475	12.3762	3.25149	2.53e-13	3.03e-12	>LE01Gene04576	ASAB_ASPFN^ASAB_ASPFN^Q:172-867,H:41-222^31.7%ID^E:6.2e-25^RecName: Full=Hydroxylase/desaturase asaB {ECO:0000303|PubMed:29674152}	.	.	KEGG:afv:AFLA_023010	GO:0016491^molecular_function^oxidoreductase activity	.
>LE01Gene04056	8.62969	8.60491	9.00408	12.2085	12.0498	11.7031	3.24726	1.45e-23	7.43e-22	>LE01Gene04056	OXDA_SCHPO^OXDA_SCHPO^Q:44-1150,H:4-335^32.4%ID^E:2.5e-40^RecName: Full=D-amino-acid oxidase	PF01266.23^DAO^FAD dependent oxidoreductase^12-374^E:8.2e-32	.	.	GO:0003884^molecular_function^D-amino-acid oxidase activity`GO:0071949^molecular_function^FAD binding`GO:0046416^biological_process^D-amino acid metabolic process	GO:0016491^molecular_function^oxidoreductase activity`GO:0055114^biological_process^oxidation-reduction process
>LE01Gene03143	6.79043	7.70836	7.95504	10.5327	11.3409	10.3275	3.24541	8.74e-13	9.54e-12	>LE01Gene03143	RUTB_HALO1^RUTB_HALO1^Q:356-991,H:25-230^27.1%ID^E:6.5e-12^RecName: Full=Peroxyureidoacrylate/ureidoacrylate amidohydrolase RutB {ECO:0000255|HAMAP-Rule:MF_00830}	PF00857.19^Isochorismatase^Isochorismatase family^110-313^E:7.2e-26	.	.	.	GO:0003824^molecular_function^catalytic activity
>LE01Gene11954	10.0993	8.00746	8.23171	10.4731	12.4288	13.0908	3.2445	0.00235338	0.00513693	>LE01Gene11954	.	.	.	.	.	.
>LE01Gene12944	6.72574	7.26883	7.11052	9.41408	10.56	10.6042	3.24421	4.39e-13	5.03e-12	>LE01Gene12944	.	.	.	.	.	.
>LE01Gene03882	7.25205	7.02378	7.02371	10.5571	10.4204	9.97297	3.24314	1.12e-25	7.54e-24	>LE01Gene03882	FAP1_SCHPO^FAP1_SCHPO^Q:221-1429,H:7-412^30.1%ID^E:1.9e-50^RecName: Full=L-pipecolate oxidase {ECO:0000312|EMBL:CAA17815.1}	PF01266.23^DAO^FAD dependent oxidoreductase^49-414^E:1.9e-42`PF13450.5^NAD_binding_8^NAD(P)-binding Rossmann-like domain^52-83^E:4.5e-05	.	KEGG:spo:SPBC354.15`KO:K00306	GO:0005829^cellular_component^cytosol`GO:0005576^cellular_component^extracellular region`GO:0005634^cellular_component^nucleus`GO:0050660^molecular_function^flavin adenine dinucleotide binding`GO:0050031^molecular_function^L-pipecolate oxidase activity`GO:0051699^molecular_function^proline oxidase activity`GO:0019477^biological_process^L-lysine catabolic process	GO:0016491^molecular_function^oxidoreductase activity`GO:0055114^biological_process^oxidation-reduction process
>LE01Gene07515	4.20737	4.85527	2.332	7.36416	7.27299	7.24608	3.23927	8.7e-09	5e-08	>LE01Gene07515	.	.	.	.	.	.
>LE01Gene06735	0	1.96011	3.18111	3.81765	5.4754	5.50511	3.21084	0.000887339	0.00212362	>LE01Gene06735	.	.	.	.	.	.
>LE01Gene11094	6.04526	4.47249	5.26018	8.40826	8.78691	8.4978	3.2056	1.58e-09	1.01e-08	>LE01Gene11094	.	.	.	.	.	.
>LE01Gene09244	9.35168	9.73453	8.886	12.5147	13.0596	11.893	3.2029	5.82e-18	1.38e-16	>LE01Gene09244	.	.	.	.	.	.
>LE01Gene07045	6.49678	4.90251	5.81971	8.26202	9.69396	8.86361	3.20175	1.51e-12	1.58e-11	>LE01Gene07045	.	.	.	.	.	.
>LE01Gene02946	7.6227	7.84161	8.30256	10.1427	11.1138	11.751	3.19951	1.2e-13	1.51e-12	>LE01Gene02946	PR5_ARATH^PR5_ARATH^Q:644-1357,H:23-239^40.1%ID^E:2.9e-32^RecName: Full=Pathogenesis-related protein 5	.	.	.	.	.
>LE01Gene07039	9.12715	9.18744	8.31175	11.8489	12.2231	12.2613	3.19851	1.32e-13	1.66e-12	>LE01Gene07039	.	.	.	.	.	.
>LE01Gene04001	7.8762	8.46635	8.84228	11.6465	12.2702	10.4624	3.19312	2.97e-08	1.55e-07	>LE01Gene04001	A7629_ARTBC^A7629_ARTBC^Q:873-3197,H:29-761^31.8%ID^E:5.7e-102^RecName: Full=Uncharacterized secreted glycosidase ARB_07629 {ECO:0000305}	PF07971.11^Glyco_hydro_92^Glycosyl hydrolase family 92^283-796^E:4.2e-127	COG3537^Alpha-1,2-mannosidase	KEGG:abe:ARB_07629	GO:0005576^cellular_component^extracellular region`GO:0030246^molecular_function^carbohydrate binding`GO:0016798^molecular_function^hydrolase activity, acting on glycosyl bonds`GO:0008152^biological_process^metabolic process	.
>LE01Gene12220	8.12723	7.786	8.23171	11.4278	11.3463	10.8764	3.181	3.96e-28	4.06e-26	>LE01Gene12220	GR_BACSU^GR_BACSU^Q:2-763,H:11-266^44.2%ID^E:2e-57^RecName: Full=Glyoxal reductase	PF00248.20^Aldo_ket_red^Aldo/keto reductase family^26-250^E:6.7e-45	COG0656^reductase	KEGG:bsu:BSU33400	GO:0043892^molecular_function^methylglyoxal reductase (NADPH-dependent) activity	.
>LE01Gene00849	6.4006	7.30445	8.29331	9.78385	11.1412	10.8725	3.1796	1.58e-09	1.02e-08	>LE01Gene00849	.	.	.	.	.	.
>LE01Gene11101	5.98019	6.45496	6.33435	9.21493	9.59106	9.45817	3.17621	2.34e-26	1.81e-24	>LE01Gene11101	.	.	.	.	.	.
>LE01Gene07037	9.96142	10.1487	10.6088	12.9601	13.6707	13.5809	3.17184	5.86e-26	4.13e-24	>LE01Gene07037	YUC3_ARATH^YUC3_ARATH^Q:1326-2495,H:22-396^30.1%ID^E:7.7e-31^RecName: Full=Probable indole-3-pyruvate monooxygenase YUCCA3	PF07992.13^Pyr_redox_2^Pyridine nucleotide-disulphide oxidoreductase^84-296^E:1.6e-11`PF13738.5^Pyr_redox_3^Pyridine nucleotide-disulphide oxidoreductase^86-286^E:6.7e-22`PF00743.18^FMO-like^Flavin-binding monooxygenase-like^87-428^E:5.2e-24`PF13434.5^K_oxygenase^L-lysine 6-monooxygenase (NADPH-requiring)^186-286^E:9.9e-13	COG2072^Monooxygenase	KEGG:ath:AT1G04610`KO:K11816	GO:0050660^molecular_function^flavin adenine dinucleotide binding`GO:0103075^molecular_function^indole-3-pyruvate monooxygenase activity`GO:0004499^molecular_function^N,N-dimethylaniline monooxygenase activity`GO:0050661^molecular_function^NADP binding`GO:0009851^biological_process^auxin biosynthetic process	GO:0016491^molecular_function^oxidoreductase activity`GO:0055114^biological_process^oxidation-reduction process`GO:0004499^molecular_function^N,N-dimethylaniline monooxygenase activity`GO:0050660^molecular_function^flavin adenine dinucleotide binding`GO:0050661^molecular_function^NADP binding
>LE01Gene04282	7.70555	7.49375	7.48824	8.90436	11.662	10.4272	3.17096	4.12e-10	2.95e-09	>LE01Gene04282	4CLL7_ARATH^4CLL7_ARATH^Q:153-1739,H:46-542^35.7%ID^E:3.1e-74^RecName: Full=4-coumarate--CoA ligase-like 7	PF00501.27^AMP-binding^AMP-binding enzyme^43-471^E:5e-79`PF13193.5^AMP-binding_C^AMP-binding enzyme C-terminal domain^480-567^E:2.5e-12	COG0318^Amp-dependent synthetase and ligase	KEGG:ath:AT4G05160`KO:K01904	GO:0005777^cellular_component^peroxisome`GO:0005524^molecular_function^ATP binding`GO:0004321^molecular_function^fatty-acyl-CoA synthase activity`GO:0016874^molecular_function^ligase activity`GO:0009695^biological_process^jasmonic acid biosynthetic process`GO:0031408^biological_process^oxylipin biosynthetic process	GO:0003824^molecular_function^catalytic activity
>LE01Gene02852	7.49655	7.35627	8.56329	11.2177	11.0619	10.9324	3.16893	5.39e-19	1.52e-17	>LE01Gene02852	CBPS2_YEAST^CBPS2_YEAST^Q:363-1886,H:62-567^40.3%ID^E:1.9e-98^RecName: Full=Putative carboxypeptidase YOL153C	PF01546.27^Peptidase_M20^Peptidase family M20/M25/M40^181-570^E:3.8e-28`PF07687.13^M20_dimer^Peptidase dimerisation domain^301-440^E:1.3e-08	.	KEGG:sce:YJL172W`KO:K01293	GO:0000328^cellular_component^fungal-type vacuole lumen`GO:0016021^cellular_component^integral component of membrane`GO:0005775^cellular_component^vacuolar lumen`GO:0005774^cellular_component^vacuolar membrane`GO:0004180^molecular_function^carboxypeptidase activity`GO:0046872^molecular_function^metal ion binding`GO:0004181^molecular_function^metallocarboxypeptidase activity`GO:0006807^biological_…	GO:0016787^molecular_function^hydrolase activity
>LE01Gene09224	6.08706	5.0774	4.5356	8.98383	8.37296	8.02382	3.16621	1.12e-08	6.35e-08	>LE01Gene09224	BVMO_PARL1^BVMO_PARL1^Q:62-1648,H:18-543^50.9%ID^E:6.3e-166^RecName: Full=Baeyer-Villiger monooxygenase	PF07992.13^Pyr_redox_2^Pyridine nucleotide-disulphide oxidoreductase^7-229^E:3.9e-09`PF00743.18^FMO-like^Flavin-binding monooxygenase-like^9-202^E:2.8e-12`PF13738.5^Pyr_redox_3^Pyridine nucleotide-disulphide oxidoreductase^10-228^E:1.3e-10`PF13434.5^K_oxygenase^L-lysine 6-monooxygenase (NADPH-requiring)^76-232^E:3.7e-09	COG2072^Monooxygenase	KEGG:pla:Plav_1781	GO:0050660^molecular_function^flavin adenine dinucleotide binding`GO:0004499^molecular_function^N,N-dimethylaniline monooxygenase activity`GO:0050661^molecular_function^NADP binding	GO:0016491^molecular_function^oxidoreductase activity`GO:0055114^biological_process^oxidation-reduction process`GO:0004499^molecular_function^N,N-dimethylaniline monooxygenase activity`GO:0050660^molecular_function^flavin adenine dinucleotide binding`GO:0050661^molecular_function^NADP binding
>LE01Gene01966	13.0727	12.6435	13.5343	16.0438	16.752	15.9384	3.16305	1.08e-09	7.16e-09	>LE01Gene01966	FDH_EMENI^FDH_EMENI^Q:36-1106,H:3-362^62.8%ID^E:1.4e-132^RecName: Full=Formate dehydrogenase {ECO:0000255|HAMAP-Rule:MF_03210}	PF00389.29^2-Hacid_dh^D-isomer specific 2-hydroxyacid dehydrogenase, catalytic domain^42-335^E:4.8e-17`PF02826.18^2-Hacid_dh_C^D-isomer specific 2-hydroxyacid dehydrogenase, NAD binding domain^127-298^E:3.6e-46`PF03446.14^NAD_binding_2^NAD binding domain of 6-phosphogluconate dehydrogenase^165-272^E:2.9e-05	.	KEGG:ani:AN6525.2`KO:K00122	GO:0005829^cellular_component^cytosol`GO:0005576^cellular_component^extracellular region`GO:0005622^cellular_component^intracellular`GO:0008863^molecular_function^formate dehydrogenase (NAD+) activity`GO:0051287^molecular_function^NAD binding`GO:0016616^molecular_function^oxidoreductase activity, acting on the CH-OH group of donors, NAD or NADP as acceptor`GO:0006083^biological_process^acetate me…	GO:0016616^molecular_function^oxidoreductase activity, acting on the CH-OH group of donors, NAD or NADP as acceptor`GO:0051287^molecular_function^NAD binding`GO:0055114^biological_process^oxidation-reduction process`GO:0050661^molecular_function^NADP binding
>LE01Gene06643	9.44505	10.6003	9.83434	13.3794	13.4768	12.5752	3.15569	1.31e-14	1.94e-13	>LE01Gene06643	.	.	.	.	.	.
>LE01Gene12986	8.25191	9.3666	8.63093	11.4125	12.5171	11.7751	3.15364	1.07e-14	1.61e-13	>LE01Gene12986	RGXB_ASPNC^RGXB_ASPNC^Q:396-1595,H:33-417^51%ID^E:7.6e-110^RecName: Full=Alpha-L-rhamnosidase rgxB	PF00295.16^Glyco_hydro_28^Glycosyl hydrolases family 28^95-406^E:1.5e-38	.	KEGG:ang:ANI_1_1122034	GO:0005576^cellular_component^extracellular region`GO:0030596^molecular_function^alpha-L-rhamnosidase activity`GO:0004650^molecular_function^polygalacturonase activity`GO:0071555^biological_process^cell wall organization`GO:0000272^biological_process^polysaccharide catabolic process	GO:0004650^molecular_function^polygalacturonase activity`GO:0005975^biological_process^carbohydrate metabolic process
>LE01Gene07949	7.12738	7.34776	7.67785	10.3606	10.6624	10.581	3.14603	4.19e-36	1.02e-33	>LE01Gene07949	AGP2_YEAST^AGP2_YEAST^Q:198-1712,H:61-561^48.4%ID^E:2.1e-130^RecName: Full=General amino acid permease AGP2	PF00324.20^AA_permease^Amino acid permease^38-507^E:3.3e-108`PF13520.5^AA_permease_2^Amino acid permease^41-488^E:4e-14`PF01636.22^APH^Phosphotransferase enzyme family^607-798^E:1.2e-10	.	KEGG:sce:YBR132C`KO:K16261	GO:0005789^cellular_component^endoplasmic reticulum membrane`GO:0000329^cellular_component^fungal-type vacuole membrane`GO:0005887^cellular_component^integral component of plasma membrane`GO:0022857^molecular_function^transmembrane transporter activity`GO:0006865^biological_process^amino acid transport`GO:1902047^biological_process^polyamine transmembrane transport`GO:1902274^biological_process^p…	GO:0055085^biological_process^transmembrane transport`GO:0016020^cellular_component^membrane`GO:0022857^molecular_function^transmembrane transporter activity
>LE01Gene06501	7.94032	8.11668	8.53218	10.9273	11.5446	11.526	3.14597	8.61e-26	5.85e-24	>LE01Gene06501	.	.	.	.	.	.
>LE01Gene07463	6.10751	6.32226	6.01238	9.57317	9.24545	8.95952	3.14586	7.55e-22	3.04e-20	>LE01Gene07463	.	.	.	.	.	.
>LE01Gene05514	7.33246	6.96935	7.11052	10.3575	10.4645	9.98037	3.14583	5.08e-13	5.75e-12	>LE01Gene05514	.	.	.	.	.	.
>LE01Gene10508	6.94618	8.36879	8.14182	9.00763	11.1975	11.8145	3.13941	1.74e-08	9.5e-08	>LE01Gene10508	.	.	.	.	.	.
>LE01Gene13084	5.6859	6.74147	6.75393	9.23524	10.0775	9.28027	3.12786	2.7e-15	4.5e-14	>LE01Gene13084	FGOX3_PENRF^FGOX3_PENRF^Q:25-1176,H:4-357^47.9%ID^E:5.3e-90^RecName: Full=Chanoclavine-I aldehyde reductase fgaOx3 {ECO:0000303|PubMed:28902217}	PF00724.19^Oxidored_FMN^NADH:flavin oxidoreductase / NADH oxidase family^9-369^E:2.5e-92	.	.	GO:0010181^molecular_function^FMN binding`GO:0016491^molecular_function^oxidoreductase activity`GO:0035835^biological_process^indole alkaloid biosynthetic process	GO:0010181^molecular_function^FMN binding`GO:0016491^molecular_function^oxidoreductase activity`GO:0055114^biological_process^oxidation-reduction process
>LE01Gene04915	6.10751	6.42291	7.26989	9.19434	10.0801	9.97594	3.12678	2.25e-14	3.24e-13	>LE01Gene04915	.	.	.	.	.	.
>LE01Gene04496	5.44997	4.53379	5.5669	8.92116	8.13083	7.70471	3.12572	6.67e-08	3.3e-07	>LE01Gene04496	.	.	.	.	.	.
>LE01Gene11558	7.99624	8.84754	8.35684	11.5695	11.9818	10.9573	3.12323	1.03e-15	1.81e-14	>LE01Gene11558	.	PF00035.25^dsrm^Double-stranded RNA binding motif^209-267^E:1.2e-07	.	.	.	.
>LE01Gene05084	4.76606	5.75489	4.25985	9.26626	7.32609	6.23592	3.12313	5.28e-06	1.92e-05	>LE01Gene05084	YHZ7_SCHPO^YHZ7_SCHPO^Q:319-1197,H:128-417^39.7%ID^E:1e-60^RecName: Full=Probable glycosidase C21B10.07	.	.	.	.	.
>LE01Gene05597	7.51963	8.05005	6.75393	9.62538	10.3269	11.4103	3.1141	3.99e-07	1.75e-06	>LE01Gene05597	CHG5_CHAGB^CHG5_CHAGB^Q:602-2266,H:49-608^34.9%ID^E:4e-84^RecName: Full=FAD-linked oxidoreductase CHGG_01242-2 {ECO:0000303|PubMed:23611317}	PF01565.22^FAD_binding_4^FAD binding domain^121-263^E:1.7e-19`PF08031.11^BBE^Berberine and berberine like^509-542^E:5.6e-07	ENOG4110F4M^FAD binding domain-containing protein	KEGG:abe:ARB_07056	GO:0005576^cellular_component^extracellular region`GO:0071949^molecular_function^FAD binding`GO:0016491^molecular_function^oxidoreductase activity	GO:0016491^molecular_function^oxidoreductase activity`GO:0050660^molecular_function^flavin adenine dinucleotide binding`GO:0055114^biological_process^oxidation-reduction process
>LE01Gene06873	6.6158	6.45496	5.26018	10.4001	8.36875	7.84742	3.1097	1.09e-07	5.23e-07	>LE01Gene06873	.	.	.	.	.	.
>LE01Gene06726	8.54972	8.0965	9.07595	11.465	12.1415	11.4886	3.10785	1.96e-15	3.33e-14	>LE01Gene06726	SPEB1_SCHPO^SPEB1_SCHPO^Q:220-1179,H:47-378^48.8%ID^E:9.5e-85^RecName: Full=Putative agmatinase 1	.	.	.	.	.
>LE01Gene09081	7.27031	6.93568	7.48011	10.5472	10.1295	10.3123	3.1028	6.6e-23	3.02e-21	>LE01Gene09081	.	.	.	.	.	.
>LE01Gene06100	7.23356	9.29979	9.79884	12.6141	12.556	10.9877	3.10143	1.16e-07	5.54e-07	>LE01Gene06100	.	.	.	.	.	.
>LE01Gene05169	7.47309	7.76059	7.99552	9.44152	12.0152	9.41734	3.09225	0.00019819	0.00053772	>LE01Gene05169	.	.	.	.	.	.
>LE01Gene11797	5.48166	5.94741	5.62703	8.71817	9.01154	8.52638	3.09188	5.86e-09	3.47e-08	>LE01Gene11797	.	.	.	.	.	.
>LE01Gene00443	4.76606	2.27934	2.00945	6.29766	6.78408	6.60082	3.09126	7.15e-10	4.91e-09	>LE01Gene00443	PSME3_CHICK^PSME3_CHICK^Q:39-761,H:7-241^30.1%ID^E:4.4e-23^RecName: Full=Proteasome activator complex subunit 3	PF02251.17^PA28_alpha^Proteasome activator pa28 alpha subunit^8-42^E:3.7e-05`PF02252.17^PA28_beta^Proteasome activator pa28 beta subunit^111-242^E:9.3e-49	.	KEGG:gga:420017`KO:K06698	GO:0005737^cellular_component^cytoplasm`GO:0005829^cellular_component^cytosol`GO:0005654^cellular_component^nucleoplasm`GO:0008537^cellular_component^proteasome activator complex`GO:0000502^cellular_component^proteasome complex`GO:0061133^molecular_function^endopeptidase activator activity`GO:0042802^molecular_function^identical protein binding`GO:0097371^molecular_function^MDM2/MDM4 family prote…	GO:0008537^cellular_component^proteasome activator complex
>LE01Gene08206	7.6227	8.05528	8.0349	11.1185	10.9451	10.9248	3.08657	3.61e-24	2e-22	>LE01Gene08206	ADHC1_MYCS2^ADHC1_MYCS2^Q:56-1021,H:11-342^34.7%ID^E:1.8e-48^RecName: Full=NADP-dependent alcohol dehydrogenase C 1	PF08240.11^ADH_N^Alcohol dehydrogenase GroES-like domain^36-137^E:5.7e-23`PF00107.25^ADH_zinc_N^Zinc-binding dehydrogenase^179-292^E:9.9e-09	COG1064^alcohol dehydrogenase	KEGG:osa:4346989`KO:K00083	GO:0045551^molecular_function^cinnamyl-alcohol dehydrogenase activity`GO:0052747^molecular_function^sinapyl alcohol dehydrogenase activity`GO:0008270^molecular_function^zinc ion binding`GO:0009809^biological_process^lignin biosynthetic process	GO:0055114^biological_process^oxidation-reduction process
>LE01Gene10615	6.94618	8.15132	6.61236	10.4835	10.5646	10.372	3.08624	5.95e-11	4.82e-10	>LE01Gene10615	.	.	.	.	.	.
>LE01Gene12197	12.3766	11.9568	12.9512	15.8474	15.2105	15.5812	3.08367	1.28e-14	1.9e-13	>LE01Gene12197	FKBP_CRYNB^FKBP_CRYNB^Q:133-453,H:1-107^72.9%ID^E:2.3e-41^RecName: Full=FK506-binding protein 1	PF00254.27^FKBP_C^FKBP-type peptidyl-prolyl cis-trans isomerase^16-105^E:7.6e-28	COG0545^Peptidyl-prolyl cis-trans isomerase	KEGG:cnb:CNBB3920`KO:K09568	GO:0005737^cellular_component^cytoplasm`GO:0003755^molecular_function^peptidyl-prolyl cis-trans isomerase activity	.
>LE01Gene05862	7.27031	6.88952	7.30712	10.3688	10.4625	9.80489	3.08145	3.38e-18	8.46e-17	>LE01Gene05862	FLS_MALDO^FLS_MALDO^Q:370-1110,H:40-280^30.1%ID^E:3.2e-20^RecName: Full=Flavonol synthase/flavanone 3-hydroxylase	PF14226.5^DIOX_N^non-haem dioxygenase in morphine synthesis N-terminal^29-133^E:1.3e-18`PF03171.19^2OG-FeII_Oxy^2OG-Fe(II) oxygenase superfamily^191-293^E:3.8e-16	.	.	.	GO:0016491^molecular_function^oxidoreductase activity`GO:0055114^biological_process^oxidation-reduction process
>LE01Gene06211	4.91275	5.56238	5.68476	8.47807	8.78059	8.05777	3.07475	2.85e-06	1.1e-05	>LE01Gene06211	ALL7_ASPFU^ALL7_ASPFU^Q:571-702,H:225-267^50%ID^E:0.00078^RecName: Full=Allergen Asp f 7	.	.	KEGG:afm:AFUA_4G06670	.	.
>LE01Gene11790	6.87638	7.56889	7.58994	10.3596	11.0514	9.55049	3.07335	3.37e-13	3.95e-12	>LE01Gene11790	.	PF13302.6^Acetyltransf_3^Acetyltransferase (GNAT) domain^123-184^E:1.1e-05	.	.	.	.
>LE01Gene01054	9.18123	9.72634	9.89368	12.3484	13.0153	12.661	3.07124	4.95e-32	8.15e-30	>LE01Gene01054	YJV7_SCHPO^YJV7_SCHPO^Q:196-1812,H:5-533^41.9%ID^E:1.8e-108^RecName: Full=Putative amidase C550.07	PF01425.20^Amidase^Amidase^83-535^E:3.5e-86	.	KEGG:spo:SPCC550.07`KO:K01426	GO:0005737^cellular_component^cytoplasm`GO:0005829^cellular_component^cytosol`GO:0005634^cellular_component^nucleus`GO:0004040^molecular_function^amidase activity`GO:0017064^molecular_function^fatty acid amide hydrolase activity`GO:0043864^molecular_function^indoleacetamide hydrolase activity`GO:0009062^biological_process^fatty acid catabolic process	.
>LE01Gene01842	8.9989	9.59589	10.1431	12.204	12.9291	12.9043	3.06398	6.12e-15	9.68e-14	>LE01Gene01842	.	.	.	.	.	.
>LE01Gene00332	10.443	10.7434	11.3129	13.8656	13.9544	14.0029	3.06364	6.55e-23	3.02e-21	>LE01Gene00332	XYL1_EMENI^XYL1_EMENI^Q:226-1146,H:12-319^60.5%ID^E:3.8e-104^RecName: Full=Probable NAD(P)H-dependent D-xylose reductase xyl1	PF00248.20^Aldo_ket_red^Aldo/keto reductase family^16-298^E:1.7e-42	.	KEGG:ani:AN0423.2`KO:K17743	GO:0005576^cellular_component^extracellular region`GO:0016491^molecular_function^oxidoreductase activity`GO:0042843^biological_process^D-xylose catabolic process	.
>LE01Gene01749	7.37526	7.34776	8.15209	11.1797	10.8072	9.93998	3.06061	3.46e-16	6.56e-15	>LE01Gene01749	YRHG_BACSU^YRHG_BACSU^Q:778-1320,H:76-260^28.1%ID^E:3.3e-07^RecName: Full=Uncharacterized transporter YrhG	PF01226.16^Form_Nir_trans^Formate/nitrite transporter^15-84^E:2.5e-10`PF01226.16^Form_Nir_trans^Formate/nitrite transporter^146-206^E:1.4e-09	.	.	GO:0016021^cellular_component^integral component of membrane`GO:0005886^cellular_component^plasma membrane`GO:0022857^molecular_function^transmembrane transporter activity	GO:0022857^molecular_function^transmembrane transporter activity`GO:0055085^biological_process^transmembrane transport`GO:0016020^cellular_component^membrane
>LE01Gene00702	5.20623	6.15675	6.2792	9.77771	8.33461	8.35492	3.0605	1.93e-15	3.29e-14	>LE01Gene00702	.	.	.	.	.	.
>LE01Gene07606	9.16668	8.99379	9.51639	12.1097	12.5942	12.1279	3.05513	5.37e-14	7.25e-13	>LE01Gene07606	HXNP_EMENI^HXNP_EMENI^Q:489-1781,H:38-468^25.3%ID^E:4.4e-41^RecName: Full=Major facilitator-type transporter hxnP	PF07690.15^MFS_1^Major Facilitator Superfamily^57-427^E:6.4e-31	.	KEGG:spo:SPAC1002.16c	GO:0032153^cellular_component^cell division site`GO:0051286^cellular_component^cell tip`GO:0005794^cellular_component^Golgi apparatus`GO:0016021^cellular_component^integral component of membrane`GO:0046943^molecular_function^carboxylic acid transmembrane transporter activity`GO:1905039^biological_process^carboxylic acid transmembrane transport	GO:0055085^biological_process^transmembrane transport`GO:0016021^cellular_component^integral component of membrane
>LE01Gene00738	8.32361	7.9524	7.90127	10.6649	11.8543	10.372	3.04745	4.18e-09	2.54e-08	>LE01Gene00738	.	.	.	.	.	.
>LE01Gene04638	8.20996	8.41839	8.43461	10.8186	11.7994	11.4136	3.04442	2.45e-26	1.87e-24	>LE01Gene04638	USTYA_ASPFN^USTYA_ASPFN^Q:436-741,H:110-205^29.8%ID^E:5.6e-06^RecName: Full=Oxidase ustYa {ECO:0000303|PubMed:24841822}	PF11807.7^DUF3328^Domain of unknown function (DUF3328)^84-190^E:5.8e-16	.	.	.	GO:0043386^biological_process^mycotoxin biosynthetic process
>LE01Gene12949	7.43313	6.76722	6.90729	9.89862	10.3269	10.0396	3.04362	1.18e-18	3.16e-17	>LE01Gene12949	.	.	.	.	.	.
>LE01Gene04639	9.81674	9.95084	9.52036	12.4375	13.1243	12.7995	3.04188	4.28e-21	1.57e-19	>LE01Gene04639	.	.	.	.	.	.
>LE01Gene01379	10.067	11.5254	11.6397	12.6974	14.5275	14.8106	3.03278	1.68e-09	1.07e-08	>LE01Gene01379	.	.	.	.	.	.
>LE01Gene12973	6.26149	8.83846	8.37449	9.25083	12.1808	10.819	3.03074	1.92e-06	7.58e-06	>LE01Gene12973	.	PF10346.8^Con-6^Conidiation protein 6^31-64^E:7e-13	.	.	.	.
>LE01Gene00985	6.65801	6.95821	6.5823	9.16171	10.4082	9.37981	3.02752	2.98e-23	1.44e-21	>LE01Gene00985	.	.	.	.	.	.
>LE01Gene13670	9.62254	9.15367	9.24138	12.9008	12.6684	10.7831	3.02161	1.2e-08	6.78e-08	>LE01Gene13670	.	.	.	.	.	.
>LE01Gene12392	6.10751	7.70836	7.17236	9.78538	10.4255	10.1381	3.0114	1.46e-16	2.85e-15	>LE01Gene12392	.	.	.	.	.	.
>LE01Gene09804	7.55729	7.55417	7.46372	10.5106	10.632	10.4326	3.00847	8.52e-54	9.71e-51	>LE01Gene09804	.	.	.	.	.	.
>LE01Gene09159	8.31043	8.89504	9.8021	11.8017	12.4677	12.0632	3.00492	4.76e-14	6.5e-13	>LE01Gene09159	LACP_KLULA^LACP_KLULA^Q:1-1299,H:92-530^29%ID^E:1.1e-43^RecName: Full=Lactose permease	PF07690.15^MFS_1^Major Facilitator Superfamily^7-354^E:2.1e-25`PF00083.23^Sugar_tr^Sugar (and other) transporter^21-431^E:2.6e-73	ENOG410XNQK^Transporter	KEGG:kla:KLLA0A11110g	GO:0016021^cellular_component^integral component of membrane`GO:0022857^molecular_function^transmembrane transporter activity`GO:0008643^biological_process^carbohydrate transport	GO:0055085^biological_process^transmembrane transport`GO:0016021^cellular_component^integral component of membrane`GO:0022857^molecular_function^transmembrane transporter activity
>LE01Gene13026	3.95987	5.23336	5.62703	8.61176	8.24553	6.74672	3.00489	0.000136546	0.000380538	>LE01Gene13026	.	.	.	.	.	.
>LE01Gene06802	8.89682	8.72805	8.81668	11.7414	12.2775	11.239	3.00188	4.22e-24	2.33e-22	>LE01Gene06802	YEC3_YEAST^YEC3_YEAST^Q:128-1483,H:22-567^28.4%ID^E:4.5e-44^RecName: Full=Uncharacterized protein YEL023C	PF09994.8^DUF2235^Uncharacterized alpha/beta hydrolase domain (DUF2235)^12-332^E:5.8e-87	.	KEGG:sce:YEL023C	.	.
>LE01Gene03036	7.91733	9.36449	9.26049	11.0042	12.799	11.5097	3.00046	3.81e-07	1.68e-06	>LE01Gene03036	FSA7_FUSSF^FSA7_FUSSF^Q:629-1768,H:47-419^26.5%ID^E:1.7e-22^RecName: Full=MFS transporter fsa7 {ECO:0000303|PubMed:25770422}	PF07690.15^MFS_1^Major Facilitator Superfamily^110-486^E:1.1e-24	.	.	.	GO:0055085^biological_process^transmembrane transport`GO:0016021^cellular_component^integral component of membrane
>LE01Gene03124	4.41856	2.76167	4.47144	7.15274	6.80917	6.96521	2.99344	2.03e-09	1.28e-08	>LE01Gene03124	.	.	.	.	.	.
>LE01Gene00097	9.48273	9.21811	9.34572	12.5184	12.7019	11.5189	2.98076	6.82e-21	2.43e-19	>LE01Gene00097	JLP1_YEAST^JLP1_YEAST^Q:540-1310,H:146-399^48.1%ID^E:2.2e-64^RecName: Full=Alpha-ketoglutarate-dependent sulfonate dioxygenase	.	.	.	.	.
>LE01Gene04957	3.42053	2.76167	4.09931	6.77538	6.67915	5.25493	2.9742	1.33e-10	1.02e-09	>LE01Gene04957	.	.	.	.	.	.
>LE01Gene12774	13.5523	12.4321	14.2441	16.3182	16.2783	16.9723	2.97158	6.23e-11	5.04e-10	>LE01Gene12774	PATD_ASPCL^PATD_ASPCL^Q:40-1041,H:4-386^43.5%ID^E:1.1e-82^RecName: Full=Alcohol dehydrogenase patD {ECO:0000303|PubMed:19383676}	.	.	.	.	.
>LE01Gene12812	9.93591	9.4244	10.0363	13.1558	12.5246	12.609	2.97006	5.68e-23	2.64e-21	>LE01Gene12812	DLHH_YEAST^DLHH_YEAST^Q:36-860,H:1-273^60.6%ID^E:5.3e-91^RecName: Full=Putative carboxymethylenebutenolidase	PF01738.17^DLH^Dienelactone hydrolase family^45-265^E:4.7e-25	.	KEGG:sce:YDL086W`KO:K01061	GO:0008806^molecular_function^carboxymethylenebutenolidase activity	GO:0016787^molecular_function^hydrolase activity
>LE01Gene02354	6.95749	7.45466	7.59748	10.3094	10.3204	10.2946	2.95447	1.22e-18	3.25e-17	>LE01Gene02354	XKS1_EMENI^XKS1_EMENI^Q:81-1769,H:12-576^39.2%ID^E:6.9e-100^RecName: Full=Probable D-xylulose kinase A	PF00370.20^FGGY_N^FGGY family of carbohydrate kinases, N-terminal domain^29-125^E:4.1e-06`PF00370.20^FGGY_N^FGGY family of carbohydrate kinases, N-terminal domain^152-292^E:1.2e-12`PF02782.15^FGGY_C^FGGY family of carbohydrate kinases, C-terminal domain^336-534^E:8.4e-17	.	KEGG:ani:AN8790.2`KO:K00854	GO:0005737^cellular_component^cytoplasm`GO:0005524^molecular_function^ATP binding`GO:0004856^molecular_function^xylulokinase activity`GO:0042732^biological_process^D-xylose metabolic process`GO:0005997^biological_process^xylulose metabolic process	GO:0016773^molecular_function^phosphotransferase activity, alcohol group as acceptor`GO:0005975^biological_process^carbohydrate metabolic process
>LE01Gene12206	7.54234	7.86565	7.33443	10.9513	10.7565	9.57218	2.95043	2.85e-12	2.84e-11	>LE01Gene12206	PLAL2_HUMAN^PLAL2_HUMAN^Q:769-993,H:186-240^34.7%ID^E:1.4e-05^RecName: Full=Zinc finger protein PLAGL2	PF00096.25^zf-C2H2^Zinc finger, C2H2 type^214-236^E:0.0021`PF00096.25^zf-C2H2^Zinc finger, C2H2 type^262-283^E:0.00057`PF13913.5^zf-C2HC_2^zinc-finger of a C2HC-type^263-284^E:0.013	COG5048^Zinc finger protein	KEGG:hsa:5326`KO:K19486	GO:0005634^cellular_component^nucleus`GO:0003700^molecular_function^DNA-binding transcription factor activity`GO:0046872^molecular_function^metal ion binding`GO:0000981^molecular_function^DNA-binding transcription factor activity, RNA polymerase II-specific`GO:0043565^molecular_function^sequence-specific DNA binding`GO:0001077^molecular_function^proximal promoter DNA-binding transcription activat…	GO:0003676^molecular_function^nucleic acid binding
>LE01Gene06973	7.57209	8.36879	8.48828	11.6566	11.1412	10.3332	2.94945	0.00228022	0.00499772	>LE01Gene06973	PGLRA_ASPKW^PGLRA_ASPKW^Q:60-1187,H:10-367^36.3%ID^E:3.1e-46^RecName: Full=Probable endopolygalacturonase A	PF00295.16^Glyco_hydro_28^Glycosyl hydrolases family 28^73-383^E:2.9e-60	.	.	GO:0005576^cellular_component^extracellular region`GO:0004650^molecular_function^polygalacturonase activity`GO:0005975^biological_process^carbohydrate metabolic process`GO:0071555^biological_process^cell wall organization	GO:0004650^molecular_function^polygalacturonase activity`GO:0005975^biological_process^carbohydrate metabolic process
>LE01Gene09179	6.71244	5.70246	7.05688	8.54104	10.1406	9.48545	2.94841	5.28e-12	5.04e-11	>LE01Gene09179	AUSD_EMENI^AUSD_EMENI^Q:112-834,H:48-242^25.8%ID^E:8.2e-17^RecName: Full=Methyltransferase ausD {ECO:0000303|PubMed:22329759}	.	.	.	.	.
>LE01Gene06494	7.77753	8.54662	8.32995	10.5633	11.7821	10.9648	2.94633	5.84e-11	4.74e-10	>LE01Gene06494	SAV2_STRVL^SAV2_STRVL^Q:150-596,H:11-162^45.8%ID^E:2.1e-31^RecName: Full=Streptavidin-V2	PF01382.16^Avidin^Avidin family^77-191^E:7e-27	.	.	GO:0005576^cellular_component^extracellular region	.
>LE01Gene09325	8.76782	8.63669	8.94919	12.268	11.9108	10.4614	2.94288	1.07e-08	6.06e-08	>LE01Gene09325	BUDC_KLEPN^BUDC_KLEPN^Q:465-1217,H:4-256^42.8%ID^E:8.5e-44^RecName: Full=Diacetyl reductase [(S)-acetoin forming]	PF08659.9^KR^KR domain^7-123^E:4.6e-09`PF00106.24^adh_short^short chain dehydrogenase^8-203^E:9.1e-55`PF13561.5^adh_short_C2^Enoyl-(Acyl carrier protein) reductase^13-255^E:7.1e-59	ENOG410XNW1^)-reductase	.	GO:0052588^molecular_function^diacetyl reductase ((S)-acetoin forming) activity`GO:0045150^biological_process^acetoin catabolic process	.
>LE01Gene03915	7.51963	7.89515	7.64187	10.6962	10.7272	10.4497	2.94153	1.8e-06	7.13e-06	>LE01Gene03915	.	.	.	.	.	.
>LE01Gene12948	8.80587	9.15123	9.18998	11.778	12.376	11.7472	2.94061	4.84e-15	7.78e-14	>LE01Gene12948	ATD3A_XENLA^ATD3A_XENLA^Q:1654-2250,H:336-542^26.8%ID^E:1.5e-07^RecName: Full=ATPase family AAA domain-containing protein 3-A	PF00004.28^AAA^ATPase family associated with various cellular activities (AAA)^560-682^E:6.9e-19	.	KEGG:yli:YALI0F26169g`KO:K08675	GO:0005759^cellular_component^mitochondrial matrix`GO:0005524^molecular_function^ATP binding`GO:0004176^molecular_function^ATP-dependent peptidase activity`GO:0003677^molecular_function^DNA binding`GO:0004252^molecular_function^serine-type endopeptidase activity`GO:0007005^biological_process^mitochondrion organization`GO:0006515^biological_process^protein quality control for misfolded or incomple…	GO:0005524^molecular_function^ATP binding
>LE01Gene05972	8.34099	9.30859	9.27935	12.052	12.2052	11.6118	2.9395	1.95e-21	7.54e-20	>LE01Gene05972	.	.	.	.	.	.
>LE01Gene09573	4.60275	4.70346	6.2792	7.7438	8.66855	8.39531	2.93622	4.24e-13	4.88e-12	>LE01Gene09573	HETE1_PODAS^HETE1_PODAS^Q:243-1235,H:277-623^21.2%ID^E:1.1e-09^RecName: Full=Vegetative incompatibility protein HET-E-1	PF12796.6^Ank_2^Ankyrin repeats (3 copies)^488-554^E:3e-07`PF13637.5^Ank_4^Ankyrin repeats (many copies)^527-578^E:5e-07`PF00023.29^Ank^Ankyrin repeat^527-554^E:0.0038`PF13637.5^Ank_4^Ankyrin repeats (many copies)^601-651^E:2.9e-06`PF12796.6^Ank_2^Ankyrin repeats (3 copies)^603-693^E:3.5e-14`PF00023.29^Ank^Ankyrin repeat^667-693^E:0.0021`PF12796.6^Ank_2^Ankyrin repeats (3 copies)^715-786^E:6.3e-0…	.	.	.	GO:0005515^molecular_function^protein binding
>LE01Gene01726	12.38	12.8055	13.2918	16.2803	15.5771	15.4145	2.93471	4.39e-12	4.25e-11	>LE01Gene01726	DEAA_VIBAL^DEAA_VIBAL^Q:324-536,H:305-375^36.6%ID^E:9.6e-06^RecName: Full=Chitin disaccharide deacetylase	.	.	.	.	.
>LE01Gene00544	3.1319	4.34147	4.09931	5.5209	7.05964	7.26558	2.93408	2.3e-08	1.23e-07	>LE01Gene00544	.	.	.	.	.	.
>LE01Gene13073	6.90002	6.35659	7.17236	10.4209	9.71899	8.66499	2.93358	1.33e-11	1.2e-10	>LE01Gene13073	.	PF14269.5^Arylsulfotran_2^Arylsulfotransferase (ASST)^115-396^E:5.9e-55`PF05935.10^Arylsulfotrans^Arylsulfotransferase (ASST)^203-387^E:1.5e-09	.	.	.	GO:0004062^molecular_function^aryl sulfotransferase activity
>LE01Gene04106	8.80274	8.40615	8.35239	11.4278	11.8655	10.9596	2.93305	2.25e-28	2.35e-26	>LE01Gene04106	.	.	.	.	.	.
>LE01Gene08279	9.61899	10.0538	10.1237	12.5006	13.4944	12.3644	2.93208	2.72e-14	3.86e-13	>LE01Gene08279	ALDH_EMENI^ALDH_EMENI^Q:10-1539,H:7-485^50.9%ID^E:1.4e-141^RecName: Full=Aldehyde dehydrogenase	PF00171.21^Aldedh^Aldehyde dehydrogenase family^35-439^E:7.9e-144`PF00171.21^Aldedh^Aldehyde dehydrogenase family^459-513^E:1.7e-12	.	KEGG:ani:AN0554.2`KO:K00128	GO:0005576^cellular_component^extracellular region`GO:0005622^cellular_component^intracellular`GO:0004029^molecular_function^aldehyde dehydrogenase (NAD) activity`GO:0004030^molecular_function^aldehyde dehydrogenase [NAD(P)+] activity`GO:0043878^molecular_function^glyceraldehyde-3-phosphate dehydrogenase (NAD+) (non-phosphorylating) activity`GO:0046187^biological_process^acetaldehyde catabolic pr…	GO:0016491^molecular_function^oxidoreductase activity`GO:0055114^biological_process^oxidation-reduction process
>LE01Gene07316	8.20996	8.02891	8.67076	11.4214	11.5806	10.5515	2.92493	1.24e-15	2.16e-14	>LE01Gene07316	Y258_HAEIN^Y258_HAEIN^Q:917-1591,H:46-274^25.2%ID^E:1.4e-12^RecName: Full=Putative glycosyltransferase HI_0258	PF13578.5^Methyltransf_24^Methyltransferase domain^67-224^E:5.1e-14`PF01501.19^Glyco_transf_8^Glycosyl transferase family 8^300-532^E:3.1e-27	.	.	.	GO:0016757^molecular_function^transferase activity, transferring glycosyl groups
>LE01Gene09404	0	2.95335	1.59336	5.29884	4.04116	3.74362	2.91575	0.00255046	0.00552789	>LE01Gene09404	.	.	.	.	.	.
>LE01Gene13766	5.08768	5.47131	6.22186	8.64923	8.63035	8.35946	2.90677	1.82e-18	4.72e-17	>LE01Gene13766	.	.	.	.	.	.
>LE01Gene13669	9.38348	9.75719	9.99413	12.9385	12.6814	12.1869	2.90337	4.98e-16	9.22e-15	>LE01Gene13669	CXE15_ARATH^CXE15_ARATH^Q:344-946,H:31-241^28.2%ID^E:1.3e-09^RecName: Full=Probable carboxylesterase 15	PF00135.27^COesterase^Carboxylesterase family^86-227^E:2.6e-05`PF07859.12^Abhydrolase_3^alpha/beta hydrolase fold^107-233^E:8.7e-16	COG0657^alpha beta hydrolase fold-3 domain protein	KEGG:ath:AT1G47480	GO:0052689^molecular_function^carboxylic ester hydrolase activity`GO:0016787^molecular_function^hydrolase activity`GO:0009056^biological_process^catabolic process	GO:0016787^molecular_function^hydrolase activity
>LE01Gene04480	6.14757	7.15638	6.59741	9.48172	9.01694	10.0593	2.90101	7.97e-22	3.19e-20	>LE01Gene04480	.	.	.	.	.	.
>LE01Gene03249	7.57209	7.76698	8.06238	10.9696	10.6998	10.4009	2.89996	5.73e-26	4.06e-24	>LE01Gene03249	MEMO1_XENTR^MEMO1_XENTR^Q:124-1059,H:8-290^43%ID^E:1.8e-65^RecName: Full=Protein MEMO1	PF01875.16^Memo^Memo-like protein^32-342^E:1.1e-67	COG1355^UPF0103 protein	KEGG:xtr:448307`KO:K06990	GO:0005737^cellular_component^cytoplasm`GO:0005634^cellular_component^nucleus`GO:0032886^biological_process^regulation of microtubule-based process	.
>LE01Gene05045	8.87013	9.45245	8.81345	11.4641	12.285	12.0343	2.8939	6.31e-08	3.13e-07	>LE01Gene05045	.	.	.	.	.	.
>LE01Gene10581	4.81663	5.72891	5.05659	7.63255	8.39798	8.20138	2.8903	4.99e-10	3.52e-09	>LE01Gene10581	.	.	.	.	.	.
>LE01Gene06427	9.74674	9.41424	11.4994	12.5187	13.1297	14.1284	2.88442	2.83e-08	1.49e-07	>LE01Gene06427	DUR3_ORYSJ^DUR3_ORYSJ^Q:245-2155,H:35-659^35.8%ID^E:4e-99^RecName: Full=Urea-proton symporter DUR3	PF00474.16^SSF^Sodium:solute symporter family^268-459^E:6.5e-07	COG0591^symporter	KEGG:osa:4349520`KO:K20989	GO:0005887^cellular_component^integral component of plasma membrane`GO:0005886^cellular_component^plasma membrane`GO:0015293^molecular_function^symporter activity`GO:0015204^molecular_function^urea transmembrane transporter activity`GO:0071918^biological_process^urea transmembrane transport	GO:0022857^molecular_function^transmembrane transporter activity`GO:0055085^biological_process^transmembrane transport`GO:0016020^cellular_component^membrane
>LE01Gene12362	3.66094	3.85708	3.33326	6.47506	6.65167	6.04601	2.88264	7.77e-11	6.18e-10	>LE01Gene12362	.	.	.	.	.	.
>LE01Gene14158	12.2169	11.6132	11.8017	14.5716	15.4662	13.8277	2.87638	1.36e-07	6.45e-07	>LE01Gene14158	.	.	.	.	.	.
>LE01Gene11180	5.57275	6.11724	4.87013	8.72137	8.86075	7.38629	2.87491	3.38e-07	1.5e-06	>LE01Gene11180	OMT1_PHACR^OMT1_PHACR^Q:440-1396,H:125-448^32.5%ID^E:1.9e-42^RecName: Full=4-O-methyltransferase 1 {ECO:0000303|PubMed:26672450}	.	.	.	.	.
>LE01Gene07068	9.51945	9.85801	10.2208	11.866	11.8441	13.7193	2.87282	1.39e-09	9.05e-09	>LE01Gene07068	YHZ7_SCHPO^YHZ7_SCHPO^Q:346-1248,H:126-417^36.4%ID^E:1.7e-48^RecName: Full=Probable glycosidase C21B10.07	.	.	KEGG:ang:ANI_1_2196024	GO:0031225^cellular_component^anchored component of membrane`GO:0005886^cellular_component^plasma membrane`GO:0052861^molecular_function^glucan endo-1,3-beta-glucanase activity, C-3 substituted reducing group`GO:0052862^molecular_function^glucan endo-1,4-beta-glucanase activity, C-3 substituted reducing group`GO:0030245^biological_process^cellulose catabolic process	.
>LE01Gene03663	5.16778	4.59259	5.59728	7.15274	8.08536	8.49368	2.87072	3.64e-05	0.000113306	>LE01Gene03663	INHA_PSEPU^INHA_PSEPU^Q:306-917,H:9-180^29.9%ID^E:3.3e-16^RecName: Full=Isonitrile hydratase	PF01965.23^DJ-1_PfpI^DJ-1/PfpI family^63-208^E:3.3e-19	.	.	.	.
>LE01Gene04220	6.88825	7.55417	5.87035	9.30092	10.4285	9.31811	2.86835	5.69e-14	7.66e-13	>LE01Gene04220	.	.	.	.	.	.
>LE01Gene00206	7.27935	6.09708	6.5516	9.27935	9.60007	9.81816	2.86798	3.58e-20	1.17e-18	>LE01Gene00206	YIQ6_YEAST^YIQ6_YEAST^Q:172-1713,H:26-542^45.9%ID^E:1.8e-126^RecName: Full=Uncharacterized transporter YIL166C	PF07690.15^MFS_1^Major Facilitator Superfamily^120-492^E:7.1e-20	.	KEGG:sce:YIL166C	GO:0016021^cellular_component^integral component of membrane`GO:0016020^cellular_component^membrane`GO:0015116^molecular_function^sulfate transmembrane transporter activity`GO:1901682^molecular_function^sulfur compound transmembrane transporter activity`GO:0008272^biological_process^sulfate transport`GO:0000316^biological_process^sulfite transport`GO:0072348^biological_process^sulfur compound tra…	GO:0055085^biological_process^transmembrane transport`GO:0016021^cellular_component^integral component of membrane
>LE01Gene10868	14.0497	14.6554	14.9285	16.726	18.0692	17.254	2.8677	6.19e-08	3.08e-07	>LE01Gene10868	ALOX1_KOMPC^ALOX1_KOMPC^Q:38-1963,H:1-637^49.4%ID^E:1.1e-176^RecName: Full=Alcohol oxidase 1	.	.	.	.	.
>LE01Gene00871	4.41856	6.91278	5.01219	7.93245	9.63029	7.74694	2.86649	3.66e-05	0.000113981	>LE01Gene00871	.	.	.	.	.	.
>LE01Gene13705	9.87606	12.0842	12.002	13.1144	15.1181	14.5456	2.86502	2.94e-07	1.32e-06	>LE01Gene13705	SFK1_YEAST^SFK1_YEAST^Q:86-529,H:9-182^29.4%ID^E:1.2e-09^RecName: Full=Protein SFK1	.	.	.	.	.
>LE01Gene09807	4.65927	4.03722	4.4043	7.124	7.79646	6.25556	2.86302	7.19e-10	4.94e-09	>LE01Gene09807	.	.	.	.	.	.
>LE01Gene07144	8.65423	8.32177	8.63826	11.6998	11.3078	11.1461	2.86114	3.63e-21	1.34e-19	>LE01Gene07144	ART1B_SCHPO^ART1B_SCHPO^Q:27-1508,H:5-441^33.3%ID^E:1.3e-65^RecName: Full=Protein-glutamate O-methyltransferase C1393.13 {ECO:0000250|UniProtKB:Q9H993}	PF01937.18^DUF89^Protein of unknown function DUF89^29-477^E:6.4e-98	.	KEGG:spo:SPCC1393.13	GO:0005829^cellular_component^cytosol`GO:0005634^cellular_component^nucleus`GO:0008168^molecular_function^methyltransferase activity`GO:0016791^molecular_function^phosphatase activity`GO:1990748^biological_process^cellular detoxification	.
>LE01Gene04647	8.88798	9.50122	9.11847	12.1506	12.4434	11.3408	2.85916	0.000168541	0.000461671	>LE01Gene04647	.	PF00704.27^Glyco_hydro_18^Glycosyl hydrolases family 18^64-301^E:9.8e-15	.	.	.	GO:0005975^biological_process^carbohydrate metabolic process
>LE01Gene00048	10.9402	11.5796	11.5405	13.3936	14.0466	14.8877	2.85764	6.22e-13	6.95e-12	>LE01Gene00048	.	.	.	.	.	.
>LE01Gene11683	9.15445	9.30639	9.34795	11.3718	12.7407	11.9271	2.85379	1.8e-09	1.15e-08	>LE01Gene11683	IFRH_ARATH^IFRH_ARATH^Q:93-812,H:1-247^24.5%ID^E:2.6e-06^RecName: Full=Isoflavone reductase homolog P3	PF03435.17^Sacchrp_dh_NADP^Saccharopine dehydrogenase NADP binding domain^9-90^E:2.8e-06`PF05368.12^NmrA^NmrA-like family^12-228^E:2.2e-20`PF01370.20^Epimerase^NAD dependent epimerase/dehydratase family^13-81^E:0.00019`PF13460.5^NAD_binding_10^NAD(P)H-binding^14-153^E:3.5e-10	.	.	GO:0050664^molecular_function^oxidoreductase activity, acting on NAD(P)H, oxygen as acceptor`GO:0009807^biological_process^lignan biosynthetic process	GO:0016491^molecular_function^oxidoreductase activity`GO:0055114^biological_process^oxidation-reduction process`GO:0003824^molecular_function^catalytic activity`GO:0050662^molecular_function^coenzyme binding
>LE01Gene08104	4.20737	3.85708	2.59545	6.75052	6.93983	5.04529	2.85295	6.48e-06	2.32e-05	>LE01Gene08104	.	.	.	.	.	.
>LE01Gene00591	4.35154	3.7578	4.09931	7.03416	6.80917	6.73278	2.85043	3.53e-13	4.11e-12	>LE01Gene00591	.	PF12937.6^F-box-like^F-box-like^110-167^E:1.2e-07	.	.	.	GO:0005515^molecular_function^protein binding
>LE01Gene05314	9.89971	10.0823	9.98842	12.7579	13.7074	10.7349	2.84988	1.59e-07	7.45e-07	>LE01Gene05314	SPI_LENED^SPI_LENED^Q:103-528,H:1-142^61.1%ID^E:3.6e-42^RecName: Full=Serine protease inhibitor	PF16850.4^Inhibitor_I66^Peptidase inhibitor I66^1-141^E:2.9e-38	.	.	GO:0004867^molecular_function^serine-type endopeptidase inhibitor activity	GO:0004867^molecular_function^serine-type endopeptidase inhibitor activity
>LE01Gene13228	6.77772	7.12685	7.35235	9.27282	9.82117	10.4844	2.84879	8.82e-09	5.06e-08	>LE01Gene13228	.	.	.	.	.	.
>LE01Gene04136	8.06584	8.04479	8.25094	10.9897	11.3739	10.3664	2.84853	4.17e-08	2.14e-07	>LE01Gene04136	MF227_ASPFN^MF227_ASPFN^Q:558-1829,H:4-420^25.8%ID^E:4.9e-27^RecName: Full=Probable efflux pump mfs2 {ECO:0000305}	PF07690.15^MFS_1^Major Facilitator Superfamily^66-456^E:3.4e-34	COG0477^major facilitator Superfamily	KEGG:cgr:CAGL0H06039g`KO:K08158	GO:0016021^cellular_component^integral component of membrane`GO:0005886^cellular_component^plasma membrane`GO:0015238^molecular_function^drug transmembrane transporter activity`GO:0006855^biological_process^drug transmembrane transport	GO:0055085^biological_process^transmembrane transport`GO:0016021^cellular_component^integral component of membrane
>LE01Gene02652	3.28342	3.85708	4.09931	6.72522	7.07005	5.25493	2.8462	8.21e-08	4.01e-07	>LE01Gene02652	.	.	.	.	.	.
>LE01Gene02632	4.48261	4.19735	5.05659	6.89363	7.41864	7.7947	2.84376	2.82e-12	2.82e-11	>LE01Gene02632	.	.	.	.	.	.
>LE01Gene11959	0	4.19735	3.18111	5.22857	6.2368	6.17535	2.8395	2.41e-05	7.79e-05	>LE01Gene11959	.	.	.	.	.	.
>LE01Gene02507	9.5478	10.3042	9.1699	12.8403	13.1172	11.1572	2.83881	0.00109727	0.00257073	>LE01Gene02507	FAHD2_XENLA^FAHD2_XENLA^Q:305-991,H:102-318^40%ID^E:4.8e-40^RecName: Full=Fumarylacetoacetate hydrolase domain-containing protein 2	PF01557.17^FAA_hydrolase^Fumarylacetoacetate (FAA) hydrolase family^84-299^E:5.2e-55	COG0179^Fumarylacetoacetate hydrolase	KEGG:ddi:DDB_G0293650	GO:0016787^molecular_function^hydrolase activity`GO:0046872^molecular_function^metal ion binding`GO:0008152^biological_process^metabolic process	GO:0003824^molecular_function^catalytic activity
>LE01Gene07159	7.88807	7.91832	7.13143	10.0489	10.7048	10.6986	2.83203	1.77e-11	1.56e-10	>LE01Gene07159	AQP9_MOUSE^AQP9_MOUSE^Q:216-1082,H:25-291^28%ID^E:7.6e-17^RecName: Full=Aquaporin-9	.	.	.	.	.
>LE01Gene06984	5.35051	6.33953	2.81814	7.73115	9.0436	7.29435	2.82751	3e-06	1.15e-05	>LE01Gene06984	.	.	.	.	.	.
>LE01Gene09005	7.21483	6.33953	6.67067	10.2419	9.7057	8.14985	2.82501	9.64e-07	3.98e-06	>LE01Gene09005	.	.	.	.	.	.
>LE01Gene07312	6.02389	4.03722	5.01219	7.72478	8.34322	7.97135	2.82369	6.04e-13	6.76e-12	>LE01Gene07312	CBPY_CANAX^CBPY_CANAX^Q:238-1455,H:120-510^41.4%ID^E:1.1e-85^RecName: Full=Carboxypeptidase Y	PF00450.21^Peptidase_S10^Serine carboxypeptidase^97-488^E:3.7e-92`PF00021.20^UPAR_LY6^u-PAR/Ly-6 domain^311-367^E:0.026	.	.	GO:0005773^cellular_component^vacuole`GO:0004185^molecular_function^serine-type carboxypeptidase activity	GO:0004185^molecular_function^serine-type carboxypeptidase activity`GO:0006508^biological_process^proteolysis
>LE01Gene13915	7.62979	8.08631	8.44717	11.1936	10.6685	10.8165	2.82246	1.84e-16	3.57e-15	>LE01Gene13915	GSHB_YEAST^GSHB_YEAST^Q:43-1521,H:4-490^36.7%ID^E:1.3e-78^RecName: Full=Glutathione synthetase	PF03917.16^GSH_synth_ATP^Eukaryotic glutathione synthase, ATP binding domain^23-507^E:4.9e-132`PF03199.14^GSH_synthase^Eukaryotic glutathione synthase^223-327^E:9e-34	.	KEGG:sce:YOL049W`KO:K21456	GO:0005829^cellular_component^cytosol`GO:0005622^cellular_component^intracellular`GO:0005524^molecular_function^ATP binding`GO:0043295^molecular_function^glutathione binding`GO:0004363^molecular_function^glutathione synthase activity`GO:0000287^molecular_function^magnesium ion binding`GO:0042803^molecular_function^protein homodimerization activity`GO:0006520^biological_process^cellular amino acid…	GO:0004363^molecular_function^glutathione synthase activity`GO:0005524^molecular_function^ATP binding`GO:0006750^biological_process^glutathione biosynthetic process
>LE01Gene07883	7.44925	8.59775	9.02936	10.8275	11.7545	11.1843	2.81222	3.07e-14	4.33e-13	>LE01Gene07883	.	.	.	.	.	.
>LE01Gene04836	6.18655	6.60531	6.75393	8.91558	9.76779	9.1785	2.81158	1.03e-15	1.81e-14	>LE01Gene04836	PDH1_AGABI^PDH1_AGABI^Q:934-2631,H:76-594^36%ID^E:1.5e-87^RecName: Full=Pyranose dehydrogenase {ECO:0000303|PubMed:11086703}	PF00732.18^GMC_oxred_N^GMC oxidoreductase^135-263^E:6.1e-24`PF05199.12^GMC_oxred_C^GMC oxidoreductase^363-504^E:2.3e-37	.	.	GO:0005576^cellular_component^extracellular region`GO:0050660^molecular_function^flavin adenine dinucleotide binding`GO:0033718^molecular_function^pyranose dehydrogenase (acceptor) activity`GO:0005975^biological_process^carbohydrate metabolic process	GO:0016614^molecular_function^oxidoreductase activity, acting on CH-OH group of donors`GO:0050660^molecular_function^flavin adenine dinucleotide binding`GO:0055114^biological_process^oxidation-reduction process
>LE01Gene06495	6.71244	7.96914	6.61236	9.85846	10.7939	8.8247	2.80804	2.78e-09	1.73e-08	>LE01Gene06495	SAV2_STRVL^SAV2_STRVL^Q:53-529,H:1-160^44.1%ID^E:4.6e-30^RecName: Full=Streptavidin-V2	PF01382.16^Avidin^Avidin family^39-154^E:3.5e-25	.	.	GO:0005576^cellular_component^extracellular region	.
>LE01Gene06549	5.38443	5.34018	6.07848	8.0338	8.85172	8.25602	2.80681	2.32e-12	2.36e-11	>LE01Gene06549	.	.	.	.	.	.
>LE01Gene04484	9.83831	9.66773	10.1027	13.0352	12.7858	12.0649	2.80453	9.58e-13	1.04e-11	>LE01Gene04484	.	.	.	.	.	.
>LE01Gene01233	7.6227	7.9524	6.91937	9.7607	10.8204	10.2982	2.80393	1.01e-16	2.01e-15	>LE01Gene01233	.	PF00339.28^Arrestin_N^Arrestin (or S-antigen), N-terminal domain^70-207^E:2.1e-05	.	.	.	.
>LE01Gene13804	8.94876	7.69501	7.52821	10.3168	12.0713	9.18107	2.80168	7.36e-05	0.000216723	>LE01Gene13804	.	.	.	.	.	.
>LE01Gene05620	8.7933	9.0578	8.69905	11.2446	12.4538	10.6833	2.80046	2.32e-10	1.71e-09	>LE01Gene05620	QUTD_ASPNC^QUTD_ASPNC^Q:39-1229,H:4-400^57.7%ID^E:2.7e-133^RecName: Full=Probable quinate permease	PF00083.23^Sugar_tr^Sugar (and other) transporter^2-61^E:2e-14	.	KEGG:ani:AN1138.2	GO:0016021^cellular_component^integral component of membrane`GO:0005886^cellular_component^plasma membrane`GO:0005351^molecular_function^carbohydrate:proton symporter activity`GO:0005355^molecular_function^glucose transmembrane transporter activity`GO:0046323^biological_process^glucose import`GO:0019630^biological_process^quinate metabolic process	GO:0022857^molecular_function^transmembrane transporter activity`GO:0055085^biological_process^transmembrane transport`GO:0016021^cellular_component^integral component of membrane
>LE01Gene08488	7.26121	7.25069	6.29782	8.99446	9.81808	10.2839	2.79995	2.24e-05	7.29e-05	>LE01Gene08488	.	.	.	.	.	.
>LE01Gene11685	9.24031	9.4702	10.108	12.6605	12.0932	12.5443	2.79995	2.3e-25	1.5e-23	>LE01Gene11685	GALM_BOVIN^GALM_BOVIN^Q:377-1201,H:29-254^30%ID^E:2.6e-21^RecName: Full=Aldose 1-epimerase	PF01263.19^Aldose_epim^Aldose 1-epimerase^18-165^E:1.1e-05`PF01263.19^Aldose_epim^Aldose 1-epimerase^195-366^E:1.4e-12	COG2017^converts alpha-aldose to the beta-anomer. It is active on D-glucose, L-arabinose, D-xylose, D-galactose, maltose and lactose (By similarity)	KEGG:bta:616676`KO:K01785	GO:0005737^cellular_component^cytoplasm`GO:0004034^molecular_function^aldose 1-epimerase activity`GO:0030246^molecular_function^carbohydrate binding`GO:0033499^biological_process^galactose catabolic process via UDP-galactose`GO:0006006^biological_process^glucose metabolic process	GO:0016853^molecular_function^isomerase activity`GO:0005975^biological_process^carbohydrate metabolic process
>LE01Gene12356	7.10721	6.45496	7.20232	9.32848	10.1736	9.60508	2.79919	2.21e-19	6.58e-18	>LE01Gene12356	.	.	.	.	.	.
>LE01Gene05178	6.20565	7.98569	5.5669	10.1675	9.96063	8.77454	2.79569	7.04e-06	2.5e-05	>LE01Gene05178	CARP_IRPLA^CARP_IRPLA^Q:418-1422,H:8-340^46.1%ID^E:3.8e-67^RecName: Full=Polyporopepsin	PF00026.22^Asp^Eukaryotic aspartyl protease^136-398^E:6.4e-25	.	.	GO:0004190^molecular_function^aspartic-type endopeptidase activity	.
>LE01Gene04815	6.57231	5.94741	6.81982	9.28369	9.18446	9.31578	2.7861	2.64e-21	9.98e-20	>LE01Gene04815	.	.	.	.	.	.
>LE01Gene06597	9.66973	9.79054	10.08	12.834	12.6152	12.3988	2.7711	1.2e-17	2.74e-16	>LE01Gene06597	ALDOB_CHICK^ALDOB_CHICK^Q:246-1274,H:8-330^36.3%ID^E:5.8e-43^RecName: Full=Fructose-bisphosphate aldolase B	PF00274.18^Glycolytic^Fructose-bisphosphate aldolase class-I^48-381^E:8.9e-66	COG3588^fructose-bisphosphate aldolase	KEGG:gga:427308`KO:K01623	GO:0034451^cellular_component^centriolar satellite`GO:0005829^cellular_component^cytosol`GO:0070062^cellular_component^extracellular exosome`GO:0005815^cellular_component^microtubule organizing center`GO:0051117^molecular_function^ATPase binding`GO:0008092^molecular_function^cytoskeletal protein binding`GO:0070061^molecular_function^fructose binding`GO:0061609^molecular_function^fructose-1-phosph…	GO:0004332^molecular_function^fructose-bisphosphate aldolase activity`GO:0006096^biological_process^glycolytic process
>LE01Gene05312	10.0826	10.1597	10.1457	12.8258	13.7395	10.9566	2.77104	4.03e-05	0.000124999	>LE01Gene05312	SPI_LENED^SPI_LENED^Q:30-455,H:1-142^100%ID^E:1.8e-79^RecName: Full=Serine protease inhibitor	PF16850.4^Inhibitor_I66^Peptidase inhibitor I66^1-139^E:1.3e-40	.	.	GO:0004867^molecular_function^serine-type endopeptidase inhibitor activity	GO:0004867^molecular_function^serine-type endopeptidase inhibitor activity
>LE01Gene00558	7.42501	7.7216	7.41339	9.98241	10.6813	10.1033	2.76846	3.58e-20	1.17e-18	>LE01Gene00558	FUM15_GIBM7^FUM15_GIBM7^Q:272-1843,H:54-585^25.9%ID^E:4.2e-39^RecName: Full=Cytochrome P450 monooxygenase FUM15 {ECO:0000303|PubMed:12620260}	PF00067.21^p450^Cytochrome P450^91-569^E:6.3e-71	.	KEGG:fvr:FVEG_14636	GO:0020037^molecular_function^heme binding`GO:0005506^molecular_function^iron ion binding`GO:0004497^molecular_function^monooxygenase activity`GO:0016705^molecular_function^oxidoreductase activity, acting on paired donors, with incorporation or reduction of molecular oxygen	GO:0005506^molecular_function^iron ion binding`GO:0016705^molecular_function^oxidoreductase activity, acting on paired donors, with incorporation or reduction of molecular oxygen`GO:0020037^molecular_function^heme binding`GO:0055114^biological_process^oxidation-reduction process
>LE01Gene00360	8.96567	9.4916	9.36791	11.8268	12.5583	11.6128	2.76844	5.17e-16	9.52e-15	>LE01Gene00360	.	.	.	.	.	.
>LE01Gene00130	8.42895	9.14633	9.55172	12.2571	12.179	10.7856	2.7675	8.73e-12	8.06e-11	>LE01Gene00130	ATA_ASPTN^ATA_ASPTN^Q:57-872,H:9-270^29.8%ID^E:3.5e-19^RecName: Full=6-methylsalicylic acid decarboxylase atA {ECO:0000303|PubMed:25265334}	PF13450.5^NAD_binding_8^NAD(P)-binding Rossmann-like domain^11-40^E:7.8e-06	.	.	GO:0016021^cellular_component^integral component of membrane`GO:0071949^molecular_function^FAD binding`GO:0004497^molecular_function^monooxygenase activity	.
>LE01Gene09115	4.20737	4.34147	3.18111	6.39712	6.53624	7.03505	2.76641	0.000848322	0.00204237	>LE01Gene09115	.	.	.	.	.	.
>LE01Gene11472	6.82789	7.31321	7.39621	10.0438	9.95923	9.8508	2.76215	3.01e-21	1.12e-19	>LE01Gene11472	.	.	.	.	.	.
>LE01Gene05588	9.09166	9.46234	10.54	12.3178	12.9354	12.4452	2.75797	2.7e-12	2.72e-11	>LE01Gene05588	SED3_ASPFU^SED3_ASPFU^Q:906-2456,H:19-545^33%ID^E:6.8e-70^RecName: Full=Tripeptidyl-peptidase sed3	PF09286.10^Pro-kuma_activ^Pro-kumamolisin, activation domain^39-179^E:1.3e-34`PF00082.21^Peptidase_S8^Subtilase family^317-503^E:0.00011	.	KEGG:afm:AFUA_3G08930`KO:K01279	GO:0005615^cellular_component^extracellular space`GO:0046872^molecular_function^metal ion binding`GO:0004252^molecular_function^serine-type endopeptidase activity`GO:0009405^biological_process^pathogenesis	GO:0008236^molecular_function^serine-type peptidase activity`GO:0004252^molecular_function^serine-type endopeptidase activity`GO:0006508^biological_process^proteolysis
>LE01Gene00167	3.28342	1.96011	0	4.23104	4.65312	5.25493	2.75463	0.000109185	0.00031058	>LE01Gene00167	.	.	.	.	.	.
>LE01Gene14624	7.22422	7.4226	7.80043	9.55713	9.88154	10.9301	2.7521	4.44e-09	2.69e-08	>LE01Gene14624	.	.	.	.	.	.
>LE01Gene11898	11.307	11.6948	12.1467	13.9924	14.4383	14.9218	2.74395	2.65e-18	6.7e-17	>LE01Gene11898	MTLD_YERPY^MTLD_YERPY^Q:112-1275,H:3-383^43.5%ID^E:2.7e-78^RecName: Full=Mannitol-1-phosphate 5-dehydrogenase {ECO:0000255|HAMAP-Rule:MF_00196}	PF01232.22^Mannitol_dh^Mannitol dehydrogenase Rossmann domain^38-159^E:2.7e-21`PF08125.12^Mannitol_dh_C^Mannitol dehydrogenase C-terminal domain^185-413^E:6.5e-45	.	KEGG:ypy:YPK_0027`KO:K00009	GO:0050662^molecular_function^coenzyme binding`GO:0008926^molecular_function^mannitol-1-phosphate 5-dehydrogenase activity`GO:0019594^biological_process^mannitol metabolic process	GO:0016491^molecular_function^oxidoreductase activity`GO:0055114^biological_process^oxidation-reduction process`GO:0050662^molecular_function^coenzyme binding
>LE01Gene04637	8.81833	9.62082	9.63645	11.9513	12.2301	12.2313	2.73971	2.28e-29	2.66e-27	>LE01Gene04637	.	.	.	.	.	.
>LE01Gene11953	8.92591	8.41432	9.0377	11.602	11.3713	11.6646	2.7372	2.31e-26	1.8e-24	>LE01Gene11953	2NPD_NEUCR^2NPD_NEUCR^Q:124-1083,H:28-366^30.5%ID^E:5.4e-31^RecName: Full=Nitronate monooxygenase	PF00478.24^IMPDH^IMP dehydrogenase / GMP reductase domain^3-221^E:9.4e-10`PF03060.14^NMO^Nitronate monooxygenase^6-332^E:5.9e-35	COG2070^2-Nitropropane dioxygenase	KEGG:bsu:BSU26800`KO:K00459	GO:0018580^molecular_function^nitronate monooxygenase activity	GO:0003824^molecular_function^catalytic activity`GO:0055114^biological_process^oxidation-reduction process`GO:0018580^molecular_function^nitronate monooxygenase activity
>LE01Gene09532	3.66094	3.7578	0	6.17224	6.01759	4.79991	2.73651	1.52e-05	5.1e-05	>LE01Gene09532	.	.	.	.	.	.
>LE01Gene10542	8.97126	8.78903	8.91342	11.6266	11.5842	11.6646	2.73489	8e-26	5.47e-24	>LE01Gene10542	.	.	.	.	.	.
>LE01Gene03641	5.48166	6.57647	6.20223	8.9865	9.30398	8.03523	2.73054	1.23e-06	5.01e-06	>LE01Gene03641	DBD23_ASPOR^DBD23_ASPOR^Q:7-525,H:158-331^43.8%ID^E:1.5e-33^RecName: Full=2,3-dihydroxybenzoate decarboxylase	PF04909.13^Amidohydro_2^Amidohydrolase^3-174^E:3.8e-16	.	KEGG:aor:AO090005000447`KO:K14333	GO:0016787^molecular_function^hydrolase activity`GO:0050150^molecular_function^o-pyrocatechuate decarboxylase activity`GO:0043640^biological_process^benzoate catabolic process via hydroxylation	GO:0016787^molecular_function^hydrolase activity
>LE01Gene09502	10.3929	9.65399	10.3345	12.7008	13.2083	12.6955	2.72627	6.13e-12	5.79e-11	>LE01Gene09502	.	.	.	.	.	.
>LE01Gene04526	3.66094	3.12252	4.25985	6.11496	6.27331	6.69012	2.72189	1e-10	7.86e-10	>LE01Gene04526	.	.	.	.	.	.
>LE01Gene04654	7.26121	5.94741	6.22186	9.74662	9.2929	8.65763	2.71831	4.63e-07	2.01e-06	>LE01Gene04654	CAN_ECOLI^CAN_ECOLI^Q:130-345,H:4-77^48.6%ID^E:1.7e-14^RecName: Full=Carbonic anhydrase 2	PF00484.18^Pro_CA^Carbonic anhydrase^127-265^E:1.2e-21	COG0288^carbonic anhydrase	KEGG:ecj:JW0122`KEGG:eco:b0126`KO:K01673	GO:0005829^cellular_component^cytosol`GO:0004089^molecular_function^carbonate dehydratase activity`GO:0008270^molecular_function^zinc ion binding`GO:0015976^biological_process^carbon utilization	GO:0004089^molecular_function^carbonate dehydratase activity`GO:0008270^molecular_function^zinc ion binding
>LE01Gene02548	6.48119	7.89515	8.62726	8.80825	10.8904	11.2235	2.71766	2.7e-06	1.04e-05	>LE01Gene02548	.	.	.	.	.	.
>LE01Gene07815	7.30615	7.1466	6.69896	9.17345	9.90063	10.1114	2.71717	1.44e-09	9.36e-09	>LE01Gene07815	PRXC_STRLI^PRXC_STRLI^Q:299-1153,H:4-275^24.7%ID^E:1.8e-06^RecName: Full=Non-heme chloroperoxidase	PF12146.7^Hydrolase_4^Serine aminopeptidase, S33^27-281^E:2.2e-10`PF00561.19^Abhydrolase_1^alpha/beta hydrolase fold^30-282^E:5e-09`PF12697.6^Abhydrolase_6^Alpha/beta hydrolase family^32-287^E:3.6e-13	.	.	.	.
>LE01Gene13907	8.07625	8.27316	8.1	10.3688	9.76138	11.7336	2.71677	1.83e-10	1.37e-09	>LE01Gene13907	LIP2_DIURU^LIP2_DIURU^Q:194-1738,H:10-537^45.2%ID^E:1.8e-119^RecName: Full=Lipase 2	PF00135.27^COesterase^Carboxylesterase family^40-528^E:2.1e-91	.	.	GO:0004806^molecular_function^triglyceride lipase activity`GO:0016042^biological_process^lipid catabolic process	.
>LE01Gene13247	6.54257	7.17574	6.72671	9.31582	9.73217	9.55247	2.71348	2.91e-34	5.86e-32	>LE01Gene13247	.	.	.	.	.	.
>LE01Gene05229	6.31524	5.43962	6.50429	8.01305	8.15549	9.71732	2.71308	2.66e-06	1.02e-05	>LE01Gene05229	2NPD_STAA2^2NPD_STAA2^Q:40-564,H:122-284^33.5%ID^E:2.8e-14^RecName: Full=Probable nitronate monooxygenase	PF03060.14^NMO^Nitronate monooxygenase^48-171^E:6e-22	.	KEGG:ncr:NCU03949`KO:K00459	GO:0005634^cellular_component^nucleus`GO:0003700^molecular_function^DNA-binding transcription factor activity`GO:0018580^molecular_function^nitronate monooxygenase activity`GO:0009410^biological_process^response to xenobiotic stimulus	GO:0018580^molecular_function^nitronate monooxygenase activity`GO:0055114^biological_process^oxidation-reduction process
>LE01Gene02589	8.98514	9.72962	9.5144	11.988	12.8486	11.106	2.71028	1.11e-06	4.51e-06	>LE01Gene02589	LIP3_ARTBC^LIP3_ARTBC^Q:161-1633,H:44-555^32%ID^E:2.1e-55^RecName: Full=Probable secreted lipase ARB_02369 {ECO:0000305}	.	.	.	.	.
>LE01Gene02671	8.48475	8.87741	8.29331	10.9676	11.6525	11.1222	2.70854	2.73e-24	1.57e-22	>LE01Gene02671	.	.	.	.	.	.
>LE01Gene04430	8.03413	7.47042	8.25571	10.7204	10.6813	10.5693	2.70725	4.42e-17	9.24e-16	>LE01Gene04430	.	.	.	.	.	.
>LE01Gene09387	10.4299	10.5994	11.4017	12.5748	13.1543	14.3869	2.70129	1.48e-13	1.84e-12	>LE01Gene09387	FUCP_ECOLI^FUCP_ECOLI^Q:606-1769,H:22-422^31.1%ID^E:3.7e-46^RecName: Full=L-fucose-proton symporter	PF07690.15^MFS_1^Major Facilitator Superfamily^34-377^E:4.6e-17`PF00083.23^Sugar_tr^Sugar (and other) transporter^83-219^E:9.3e-06	.	.	.	GO:0055085^biological_process^transmembrane transport`GO:0016021^cellular_component^integral component of membrane`GO:0022857^molecular_function^transmembrane transporter activity
>LE01Gene13129	10.2158	10.4741	10.3289	13.1343	13.3076	12.5895	2.69904	1.2e-20	4.18e-19	>LE01Gene13129	AIF1_SCHPO^AIF1_SCHPO^Q:187-1719,H:81-611^40.6%ID^E:3.1e-103^RecName: Full=Apoptosis-inducing factor 1	PF00355.25^Rieske^Rieske [2Fe-2S] domain^40-125^E:4.5e-18`PF13806.5^Rieske_2^Rieske-like [2Fe-2S] domain^42-136^E:8.8e-07`PF07992.13^Pyr_redox_2^Pyridine nucleotide-disulphide oxidoreductase^166-471^E:1e-50`PF00070.26^Pyr_redox^Pyridine nucleotide-disulphide oxidoreductase^306-378^E:4.5e-08`PF14759.5^Reductase_C^Reductase C-terminal^491-565^E:8.6e-10	.	KEGG:spo:SPAC26F1.14c	GO:0005829^cellular_component^cytosol`GO:0005743^cellular_component^mitochondrial inner membrane`GO:0005741^cellular_component^mitochondrial outer membrane`GO:0005634^cellular_component^nucleus`GO:0051537^molecular_function^2 iron, 2 sulfur cluster binding`GO:0050660^molecular_function^flavin adenine dinucleotide binding`GO:0046872^molecular_function^metal ion binding`GO:0016668^molecular_functio…	GO:0016491^molecular_function^oxidoreductase activity`GO:0051537^molecular_function^2 iron, 2 sulfur cluster binding`GO:0055114^biological_process^oxidation-reduction process`GO:0008942^molecular_function^nitrite reductase [NAD(P)H] activity`GO:0042128^biological_process^nitrate assimilation
>LE01Gene13232	6.51221	5.43962	6.05678	7.55571	8.87863	9.29695	2.69594	2e-09	1.26e-08	>LE01Gene13232	YL8J_SCHPO^YL8J_SCHPO^Q:329-490,H:467-520^63%ID^E:6.2e-14^RecName: Full=Zinc finger protein C25B8.19c	PF00096.25^zf-C2H2^Zinc finger, C2H2 type^84-106^E:2.6e-05`PF13912.5^zf-C2H2_6^C2H2-type zinc finger^84-106^E:0.086`PF00096.25^zf-C2H2^Zinc finger, C2H2 type^112-136^E:6e-05	.	KEGG:spo:SPAC25B8.19c	GO:0005634^cellular_component^nucleus`GO:0046872^molecular_function^metal ion binding`GO:0000978^molecular_function^RNA polymerase II proximal promoter sequence-specific DNA binding`GO:0001078^molecular_function^proximal promoter DNA-binding transcription repressor activity, RNA polymerase II-specific`GO:0006882^biological_process^cellular zinc ion homeostasis`GO:0034225^biological_process^regula…	GO:0003676^molecular_function^nucleic acid binding
>LE01Gene02202	3.28342	2.54057	2.81814	4.66272	5.8096	5.60033	2.69321	1.15e-05	3.91e-05	>LE01Gene02202	YTX2_XENLA^YTX2_XENLA^Q:1018-3645,H:80-893^26.4%ID^E:6.7e-63^RecName: Full=Transposon TX1 uncharacterized 149 kDa protein	PF00078.26^RVT_1^Reverse transcriptase (RNA-dependent DNA polymerase)^824-1046^E:2.7e-42`PF00075.23^RNase_H^RNase H^1438-1575^E:1.4e-20	.	.	.	GO:0003676^molecular_function^nucleic acid binding`GO:0004523^molecular_function^RNA-DNA hybrid ribonuclease activity
>LE01Gene13536	5.20623	4.40847	5.26018	7.71839	7.52844	7.71892	2.68997	2.4e-07	1.09e-06	>LE01Gene13536	DYRK3_RAT^DYRK3_RAT^Q:577-1023,H:375-521^32.7%ID^E:2.4e-12^RecName: Full=Dual specificity tyrosine-phosphorylation-regulated kinase 3	.	.	.	.	.
>LE01Gene06426	10.0513	10.5994	10.4038	13.4923	12.9493	12.5866	2.68997	8.81e-24	4.66e-22	>LE01Gene06426	NEG1_NEUCR^NEG1_NEUCR^Q:483-1625,H:46-416^33.5%ID^E:3.5e-39^RecName: Full=Endo-1,6-beta-D-glucanase	PF02055.15^Glyco_hydro_30^Glycosyl hydrolase family 30 TIM-barrel domain^68-365^E:1.5e-27`PF02057.14^Glyco_hydro_59^Glycosyl hydrolase family 59^96-331^E:2e-06	.	.	GO:0005576^cellular_component^extracellular region`GO:0005615^cellular_component^extracellular space`GO:0046557^molecular_function^glucan endo-1,6-beta-glucosidase activity`GO:0004348^molecular_function^glucosylceramidase activity`GO:0016798^molecular_function^hydrolase activity, acting on glycosyl bonds`GO:0005976^biological_process^polysaccharide metabolic process`GO:0006665^biological_process^…	GO:0004336^molecular_function^galactosylceramidase activity`GO:0006683^biological_process^galactosylceramide catabolic process
>LE01Gene00810	7.40035	7.56155	7.62723	9.9636	10.148	10.4719	2.68374	1.78e-22	7.84e-21	>LE01Gene00810	BOA17_BOTFB^BOA17_BOTFB^Q:104-946,H:4-269^34.5%ID^E:2e-30^RecName: Full=Oxidoreductase BOA17 {ECO:0000303|PubMed:21722295}	PF00106.24^adh_short^short chain dehydrogenase^37-225^E:5.2e-39`PF13561.5^adh_short_C2^Enoyl-(Acyl carrier protein) reductase^46-227^E:1.4e-28	COG1028^Dehydrogenase reductase	KEGG:hsa:50700`KO:K11150	GO:0005737^cellular_component^cytoplasm`GO:0005887^cellular_component^integral component of plasma membrane`GO:0004303^molecular_function^estradiol 17-beta-dehydrogenase activity`GO:0052650^molecular_function^NADP-retinol dehydrogenase activity`GO:0004745^molecular_function^retinol dehydrogenase activity`GO:0006703^biological_process^estrogen biosynthetic process`GO:0050896^biological_process^res…	.
>LE01Gene12411	7.96855	7.88342	7.66357	8.87878	9.19163	11.7116	2.68239	4.13e-05	0.00012761	>LE01Gene12411	ASPR1_PHARH^ASPR1_PHARH^Q:588-1544,H:88-403^42.8%ID^E:1.9e-68^RecName: Full=Aspartic protease {ECO:0000303|PubMed:10091328, ECO:0000312|EMBL:AAC17105.1}	.	.	.	.	.
>LE01Gene13973	6.24311	7.2137	5.43855	8.86726	9.75977	8.4978	2.67712	0.000105998	0.000302323	>LE01Gene13973	.	.	.	.	.	.
>LE01Gene05971	6.96872	7.5393	7.21217	9.78691	10.4123	9.38873	2.67388	3.09e-15	5.11e-14	>LE01Gene05971	.	.	.	.	.	.
>LE01Gene13765	5.16778	5.30544	6.56704	8.2532	8.76785	8.33198	2.66525	2.77e-08	1.46e-07	>LE01Gene13765	.	.	.	.	.	.
>LE01Gene11313	9.12715	8.94667	8.89214	11.3056	11.9759	11.5989	2.66316	2.72e-23	1.33e-21	>LE01Gene11313	ASM3_CAEEL^ASM3_CAEEL^Q:357-2027,H:17-580^28.1%ID^E:2.9e-52^RecName: Full=Putative sphingomyelin phosphodiesterase asm-3	PF00149.27^Metallophos^Calcineurin-like phosphoesterase^150-417^E:3.8e-14`PF00248.20^Aldo_ket_red^Aldo/keto reductase family^633-801^E:3.8e-32	ENOG410YYPB^Sphingomyelin phosphodiesterase	KEGG:cel:CELE_W03G1.7`KO:K12350	GO:0005576^cellular_component^extracellular region`GO:0016798^molecular_function^hydrolase activity, acting on glycosyl bonds`GO:0046872^molecular_function^metal ion binding`GO:0004767^molecular_function^sphingomyelin phosphodiesterase activity`GO:0046513^biological_process^ceramide biosynthetic process`GO:0006685^biological_process^sphingomyelin catabolic process	GO:0016787^molecular_function^hydrolase activity
>LE01Gene01904	5.44997	6.43902	7.83907	8.93226	8.9224	10.3205	2.65835	1.48e-07	6.99e-07	>LE01Gene01904	.	.	.	.	.	.
>LE01Gene01064	10.466	10.1754	10.5662	12.9535	13.4355	12.7225	2.65745	4.24e-12	4.11e-11	>LE01Gene01064	.	.	.	.	.	.
>LE01Gene06173	8.77103	8.08118	8.7268	10.8979	11.5078	11.1637	2.65594	3.82e-16	7.18e-15	>LE01Gene06173	LACP_KLULA^LACP_KLULA^Q:285-1745,H:70-548^33%ID^E:7.7e-69^RecName: Full=Lactose permease	.	.	.	.	.
>LE01Gene09604	8.76138	10.0019	10.3657	11.5212	13.0959	12.492	2.65248	2.68e-10	1.96e-09	>LE01Gene09604	.	.	.	.	.	.
>LE01Gene04140	8.66462	8.99923	8.91342	11.9133	11.5034	10.9804	2.6519	1.21e-16	2.4e-15	>LE01Gene04140	APDF_EMENI^APDF_EMENI^Q:1451-2659,H:4-403^30%ID^E:4.5e-47^RecName: Full=Aspyridones efflux protein apdF {ECO:0000303|PubMed:17369821}	.	.	.	.	.
>LE01Gene04205	9.57376	9.24814	10.0112	12.5159	12.1049	12.2238	2.64863	2.38e-24	1.38e-22	>LE01Gene04205	DDC_MOUSE^DDC_MOUSE^Q:491-1933,H:1-468^41%ID^E:2.3e-101^RecName: Full=Aromatic-L-amino-acid decarboxylase	.	.	.	.	.
>LE01Gene02221	4.35154	4.47249	3.33326	6.61935	7.07005	6.36808	2.64814	2.23e-12	2.27e-11	>LE01Gene02221	.	.	.	.	.	.
>LE01Gene11881	5.57275	5.43962	5.74026	8.21736	8.47053	7.87941	2.64602	2.77e-16	5.31e-15	>LE01Gene11881	.	.	.	.	.	.
>LE01Gene03102	8.37091	7.7017	8.32995	10.8416	11.2419	10.1208	2.6453	5.77e-11	4.69e-10	>LE01Gene03102	.	.	.	.	.	.
>LE01Gene04956	10.05	9.38335	10.7285	12.6412	12.787	12.9564	2.64505	6e-17	1.24e-15	>LE01Gene04956	.	.	.	.	.	.
>LE01Gene06833	12.6218	12.6916	12.5268	15.6324	15.4107	14.4861	2.64013	2.78e-13	3.3e-12	>LE01Gene06833	AGO1_ARATH^AGO1_ARATH^Q:628-3099,H:182-1008^35.2%ID^E:2.5e-125^RecName: Full=Protein argonaute 1	.	.	.	.	.
>LE01Gene01125	6.22451	6.39013	6.7129	9.28369	9.21058	8.6796	2.63981	4.47e-20	1.45e-18	>LE01Gene01125	YC0H_SCHPO^YC0H_SCHPO^Q:85-654,H:6-197^43.8%ID^E:1.8e-39^RecName: Full=HD domain-containing protein C4G3.17	PF13023.5^HD_3^HD domain^40-186^E:8.5e-43`PF01966.21^HD^HD domain^63-164^E:5.1e-05	.	KEGG:spo:SPCC4G3.17`KO:K07023	GO:0005829^cellular_component^cytosol`GO:0005634^cellular_component^nucleus`GO:0002953^molecular_function^5'-deoxynucleotidase activity`GO:0042578^molecular_function^phosphoric ester hydrolase activity	.
>LE01Gene04619	8.44913	8.90957	9.91343	12.359	11.3999	11.634	2.63529	1.84e-10	1.38e-09	>LE01Gene04619	RHMD_BURCA^RHMD_BURCA^Q:208-1368,H:4-386^48.7%ID^E:2e-111^RecName: Full=L-rhamnonate dehydratase {ECO:0000255|HAMAP-Rule:MF_01288}	PF02746.15^MR_MLE_N^Mandelate racemase / muconate lactonizing enzyme, N-terminal domain^65-154^E:6.6e-11`PF13378.5^MR_MLE_C^Enolase C-terminal domain-like^188-389^E:7.5e-43	.	KEGG:bcn:Bcen_6403`KO:K12661	GO:0050032^molecular_function^L-rhamnonate dehydratase activity`GO:0046872^molecular_function^metal ion binding`GO:0009063^biological_process^cellular amino acid catabolic process	.
>LE01Gene14858	6.12768	5.80548	7.14177	8.51175	9.06458	9.53048	2.63291	1.01e-10	7.91e-10	>LE01Gene14858	.	.	.	.	.	.
>LE01Gene06152	11.4684	10.4838	11.1425	13.7808	14.4245	12.0938	2.63186	9.33e-08	4.53e-07	>LE01Gene06152	.	.	.	.	.	.
>LE01Gene06090	2.28775	4.90251	4.18181	6.7124	7.23648	5.77378	2.6221	1.12e-07	5.39e-07	>LE01Gene06090	KYNB_BACCR^KYNB_BACCR^Q:16-648,H:5-205^34%ID^E:1.1e-20^RecName: Full=Kynurenine formamidase {ECO:0000255|HAMAP-Rule:MF_01969, ECO:0000303|PubMed:14592712}	PF04199.12^Cyclase^Putative cyclase^8-161^E:2e-32	COG1878^Cyclase family	KEGG:ath:AT1G44542	GO:0005576^cellular_component^extracellular region`GO:0004061^molecular_function^arylformamidase activity`GO:0019441^biological_process^tryptophan catabolic process to kynurenine	GO:0004061^molecular_function^arylformamidase activity`GO:0019441^biological_process^tryptophan catabolic process to kynurenine
>LE01Gene12476	6.92329	7.25979	7.65637	10.3041	9.49771	9.85725	2.62097	1.02e-05	3.51e-05	>LE01Gene12476	A1345_ARTBC^A1345_ARTBC^Q:592-1974,H:43-493^27.5%ID^E:1.5e-33^RecName: Full=Probable extracellular serine carboxypeptidase {ECO:0000305}	PF05577.11^Peptidase_S28^Serine carboxypeptidase S28^66-186^E:1.4e-20`PF05577.11^Peptidase_S28^Serine carboxypeptidase S28^215-280^E:3.2e-14`PF05577.11^Peptidase_S28^Serine carboxypeptidase S28^403-496^E:1e-13	ENOG410Y38A^Lysosomal Pro-X	KEGG:mmu:72461`KO:K01285	GO:0045178^cellular_component^basal part of cell`GO:0005764^cellular_component^lysosome`GO:0004180^molecular_function^carboxypeptidase activity`GO:0008239^molecular_function^dipeptidyl-peptidase activity`GO:0008236^molecular_function^serine-type peptidase activity`GO:0060055^biological_process^angiogenesis involved in wound healing`GO:0097009^biological_process^energy homeostasis`GO:0042593^biolo…	GO:0008236^molecular_function^serine-type peptidase activity`GO:0006508^biological_process^proteolysis
>LE01Gene02192	8.46507	8.69152	8.87674	11.7232	11.1081	10.9656	2.62005	6.72e-14	8.94e-13	>LE01Gene02192	BCAT_NEMVE^BCAT_NEMVE^Q:252-1397,H:37-405^41.1%ID^E:1.9e-82^RecName: Full=Branched-chain-amino-acid aminotransferase	PF01063.18^Aminotran_4^Amino-transferase class IV^90-310^E:6e-29	COG0115^brancheD-chain amino acid aminotransferase	KEGG:mbr:MONBRDRAFT_37018`KO:K00826	GO:0005739^cellular_component^mitochondrion`GO:0004084^molecular_function^branched-chain-amino-acid transaminase activity`GO:0052656^molecular_function^L-isoleucine transaminase activity`GO:0052654^molecular_function^L-leucine transaminase activity`GO:0052655^molecular_function^L-valine transaminase activity`GO:0009098^biological_process^leucine biosynthetic process`GO:0009099^biological_process^…	GO:0003824^molecular_function^catalytic activity
>LE01Gene05823	7.22422	7.43068	8.75738	10.7426	10.4123	10.5888	2.61804	6.05e-15	9.59e-14	>LE01Gene05823	CPS1_PENJA^CPS1_PENJA^Q:263-1546,H:1-422^49.2%ID^E:2.3e-121^RecName: Full=Carboxypeptidase S1	.	.	.	.	.
>LE01Gene12348	5.24367	5.59151	5.29766	6.47506	7.37731	8.96549	2.61799	3.84e-06	1.44e-05	>LE01Gene12348	.	.	.	.	.	.
>LE01Gene13610	8.2427	8.22286	8.17744	10.6279	11.182	10.5955	2.61736	1.09e-15	1.91e-14	>LE01Gene13610	ARK73_HUMAN^ARK73_HUMAN^Q:295-1281,H:13-329^42.6%ID^E:9.8e-67^RecName: Full=Aflatoxin B1 aldehyde reductase member 3	PF00248.20^Aldo_ket_red^Aldo/keto reductase family^9-329^E:3.9e-50	COG0667^Aldo keto reductase	KEGG:hsa:22977`KO:K15303	GO:0005829^cellular_component^cytosol`GO:0070062^cellular_component^extracellular exosome`GO:0004033^molecular_function^aldo-keto reductase (NADP) activity`GO:0009055^molecular_function^electron transfer activity`GO:0042802^molecular_function^identical protein binding`GO:0006081^biological_process^cellular aldehyde metabolic process`GO:0006805^biological_process^xenobiotic metabolic process	.
>LE01Gene04612	9.74511	8.32177	9.16231	13.0178	10.6223	9.73667	2.61649	2.49e-05	8.04e-05	>LE01Gene04612	EXGB_EMENI^EXGB_EMENI^Q:424-1770,H:37-409^30.5%ID^E:7.1e-44^RecName: Full=Glucan endo-1,6-beta-glucosidase B	PF00150.17^Cellulase^Cellulase (glycosyl hydrolase family 5)^101-440^E:9.8e-11	.	KEGG:ani:AN3777.2`KO:K22277	GO:0009986^cellular_component^cell surface`GO:0005576^cellular_component^extracellular region`GO:0046557^molecular_function^glucan endo-1,6-beta-glucosidase activity`GO:0071555^biological_process^cell wall organization`GO:0006073^biological_process^cellular glucan metabolic process`GO:0009251^biological_process^glucan catabolic process	GO:0004553^molecular_function^hydrolase activity, hydrolyzing O-glycosyl compounds`GO:0005975^biological_process^carbohydrate metabolic process
>LE01Gene03342	10.5506	10.2389	10.7931	12.5276	12.9992	13.6961	2.61068	1.18e-16	2.34e-15	>LE01Gene03342	THI4_COPC7^THI4_COPC7^Q:32-946,H:1-298^80.7%ID^E:2.6e-138^RecName: Full=Thiamine thiazole synthase {ECO:0000255|HAMAP-Rule:MF_03158}	PF01946.16^Thi4^Thi4 family^51-290^E:3.9e-102`PF01266.23^DAO^FAD dependent oxidoreductase^69-119^E:1.9e-08`PF05834.11^Lycopene_cycl^Lycopene cyclase protein^69-101^E:2.4e-05`PF13454.5^NAD_binding_9^FAD-NAD(P)-binding^71-113^E:0.00013`PF13450.5^NAD_binding_8^NAD(P)-binding Rossmann-like domain^72-106^E:3.6e-06	COG1635^Involved in biosynthesis of the thiamine precursor thiazole. Catalyzes the conversion of NAD and glycine to adenosine diphosphate 5-(2-hydroxyethyl)-4-methylthiazole-2-carboxylic acid (ADT), an adenylated thiazole intermediate. The reaction includes an iron-dependent sulfide transfer from a conserved cysteine residue of the protein to a thiazole intermediate. The enzyme can only undergo a…	KEGG:cci:CC1G_04976`KO:K03146	GO:0005829^cellular_component^cytosol`GO:0005634^cellular_component^nucleus`GO:0008198^molecular_function^ferrous iron binding`GO:0000002^biological_process^mitochondrial genome maintenance`GO:0006950^biological_process^response to stress`GO:0009228^biological_process^thiamine biosynthetic process`GO:0052837^biological_process^thiazole biosynthetic process	GO:0016491^molecular_function^oxidoreductase activity`GO:0055114^biological_process^oxidation-reduction process
>LE01Gene12298	8.5003	9.24586	9.18998	11.6111	11.6829	11.5585	2.60462	7.6e-14	9.98e-13	>LE01Gene12298	YA03_SCHPO^YA03_SCHPO^Q:21-632,H:2-214^30.3%ID^E:2e-16^RecName: Full=Probable phosphatase SPAC5H10.03	.	.	.	.	.
>LE01Gene06704	6.86441	7.66107	5.84525	9.82462	9.73544	8.98915	2.5997	7.95e-10	5.4e-09	>LE01Gene06704	.	PF00561.19^Abhydrolase_1^alpha/beta hydrolase fold^50-150^E:2.6e-06`PF12697.6^Abhydrolase_6^Alpha/beta hydrolase family^52-291^E:2.3e-06	.	.	.	.
>LE01Gene10176	13.9816	13.7447	14.4376	16.5485	16.5954	16.8801	2.5985	5.75e-27	4.8e-25	>LE01Gene10176	CYPH_SCHPO^CYPH_SCHPO^Q:111-596,H:1-162^72.2%ID^E:1.4e-64^RecName: Full=Peptidyl-prolyl cis-trans isomerase	PF00160.20^Pro_isomerase^Cyclophilin type peptidyl-prolyl cis-trans isomerase/CLD^43-193^E:4.6e-46	.	KEGG:spo:SPBC28F2.03`KO:K01802	GO:0005829^cellular_component^cytosol`GO:0005634^cellular_component^nucleus`GO:0003755^molecular_function^peptidyl-prolyl cis-trans isomerase activity`GO:0006457^biological_process^protein folding	GO:0003755^molecular_function^peptidyl-prolyl cis-trans isomerase activity`GO:0000413^biological_process^protein peptidyl-prolyl isomerization
>LE01Gene13807	5.79081	6.28708	4.767	8.33908	8.73877	7.69755	2.59812	1.15e-10	8.87e-10	>LE01Gene13807	.	.	.	.	.	.
>LE01Gene12490	10.4012	10.3988	11.3641	12.9342	13.943	13.0901	2.59763	2.83e-11	2.42e-10	>LE01Gene12490	FMDA_METME^FMDA_METME^Q:229-1401,H:3-392^55.3%ID^E:1.2e-128^RecName: Full=Formamidase	.	.	.	.	.
>LE01Gene09683	8.09174	8.12666	7.71988	9.94043	11.3334	10.0225	2.59726	2.61e-13	3.12e-12	>LE01Gene09683	PDT1_SCHPO^PDT1_SCHPO^Q:584-2020,H:73-468^38.5%ID^E:2.7e-67^RecName: Full=Manganese transporter pdt1	PF01566.17^Nramp^Natural resistance-associated macrophage protein^148-370^E:2.1e-46`PF01566.17^Nramp^Natural resistance-associated macrophage protein^444-606^E:1.8e-40	.	KEGG:spo:SPAC27F1.08`KO:K12346	GO:0005783^cellular_component^endoplasmic reticulum`GO:0030176^cellular_component^integral component of endoplasmic reticulum membrane`GO:0005384^molecular_function^manganese ion transmembrane transporter activity`GO:0046872^molecular_function^metal ion binding`GO:0030026^biological_process^cellular manganese ion homeostasis`GO:0071421^biological_process^manganese ion transmembrane transport	GO:0046873^molecular_function^metal ion transmembrane transporter activity`GO:0030001^biological_process^metal ion transport`GO:0016020^cellular_component^membrane
>LE01Gene07623	9.19563	9.1922	9.39842	12.1188	11.7383	11.6628	2.59081	7.65e-20	2.42e-18	>LE01Gene07623	.	PF13462.5^Thioredoxin_4^Thioredoxin^21-116^E:1.1e-07	.	.	.	.
>LE01Gene05309	8.20996	8.20413	8.05693	10.2035	11.688	9.37083	2.58827	1.25e-06	5.08e-06	>LE01Gene05309	SPI_LENED^SPI_LENED^Q:23-448,H:1-142^89.4%ID^E:2.1e-71^RecName: Full=Serine protease inhibitor	PF16850.4^Inhibitor_I66^Peptidase inhibitor I66^7-145^E:8e-39	.	.	GO:0004867^molecular_function^serine-type endopeptidase inhibitor activity	GO:0004867^molecular_function^serine-type endopeptidase inhibitor activity
>LE01Gene04706	5.20623	5.56238	2.59545	8.13811	7.45882	6.11213	2.58535	0.00034366	0.000892433	>LE01Gene04706	.	.	.	.	.	.
>LE01Gene02836	9.31916	9.13153	9.18998	11.6253	11.9546	11.7978	2.58515	1.69e-13	2.08e-12	>LE01Gene02836	RDR1_ARATH^RDR1_ARATH^Q:1701-3503,H:359-931^32.3%ID^E:6.4e-66^RecName: Full=RNA-dependent RNA polymerase 1	.	.	.	.	.
>LE01Gene12223	1.55654	3.12252	4.47144	4.23104	4.41246	7.20627	2.58465	0.00202258	0.00448521	>LE01Gene12223	.	.	.	.	.	.
>LE01Gene11596	8.07625	7.38982	8.78404	10.7738	10.7931	10.7376	2.57925	7.04e-19	1.95e-17	>LE01Gene11596	YTET_BACSU^YTET_BACSU^Q:328-1218,H:73-371^21.5%ID^E:2.6e-15^RecName: Full=Putative oxidoreductase YteT	PF01408.21^GFO_IDH_MocA^Oxidoreductase family, NAD-binding Rossmann fold^38-166^E:2.4e-17`PF02894.16^GFO_IDH_MocA_C^Oxidoreductase family, C-terminal alpha/beta domain^201-264^E:0.00017	.	KEGG:ag:AAA27690`KEGG:zmo:ZMO0689`KO:K00118	GO:0042597^cellular_component^periplasmic space`GO:0047061^molecular_function^glucose-fructose oxidoreductase activity`GO:0006061^biological_process^sorbitol biosynthetic process	GO:0016491^molecular_function^oxidoreductase activity`GO:0055114^biological_process^oxidation-reduction process
>LE01Gene06647	8.03946	7.52428	8.14696	10.5846	9.98835	10.8132	2.57899	5.47e-06	1.98e-05	>LE01Gene06647	.	.	.	.	.	.
>LE01Gene11720	6.99091	7.76059	8.11057	9.77925	10.5348	10.3731	2.57774	4.66e-14	6.38e-13	>LE01Gene11720	.	PF17389.1^Bac_rhamnosid6H^Bacterial alpha-L-rhamnosidase 6 hairpin glycosidase domain^248-468^E:4.5e-17`PF01204.17^Trehalase^Trehalase^382-460^E:3.5e-07	.	.	.	GO:0004555^molecular_function^alpha,alpha-trehalase activity`GO:0005991^biological_process^trehalose metabolic process
>LE01Gene12154	5.31577	5.59151	6.61236	8.68575	8.18454	8.59735	2.57304	1.63e-11	1.45e-10	>LE01Gene12154	.	.	.	.	.	.
>LE01Gene04593	6.46543	6.60531	6.72671	8.78089	9.34957	9.28982	2.57102	2.71e-07	1.22e-06	>LE01Gene04593	OPHFS_ASPCL^OPHFS_ASPCL^Q:1653-2432,H:55-317^26.6%ID^E:2e-14^RecName: Full=Ophiobolin F synthase {ECO:0000303|PubMed:23324037}	.	.	.	.	.
>LE01Gene10221	5.08768	5.50231	6.42182	8.08938	8.66512	8.1603	2.57015	2.89e-10	2.1e-09	>LE01Gene10221	AIM9_LODEL^AIM9_LODEL^Q:386-1282,H:146-445^24.8%ID^E:2.7e-07^RecName: Full=Altered inheritance of mitochondria protein 9, mitochondrial	PF01636.22^APH^Phosphotransferase enzyme family^273-341^E:2.7e-07	.	.	.	.
>LE01Gene08824	10.1296	8.52035	9.53808	12.6059	12.3712	10.7288	2.56967	2.3e-07	1.05e-06	>LE01Gene08824	.	.	.	.	.	.
>LE01Gene05777	7.21483	7.53181	8.11582	8.97849	11.3911	8.71195	2.56865	4.77e-06	1.75e-05	>LE01Gene05777	.	.	.	.	.	.
>LE01Gene04275	8.96567	8.47027	8.95507	11.3482	11.9013	10.6118	2.56833	1.75e-14	2.56e-13	>LE01Gene04275	.	.	.	.	.	.
>LE01Gene04078	8.12221	9.10653	8.97256	9.73874	12.0567	11.4103	2.55901	4.45e-07	1.93e-06	>LE01Gene04078	FABG_ECOLI^FABG_ECOLI^Q:71-694,H:7-196^25.4%ID^E:1.5e-09^RecName: Full=3-oxoacyl-[acyl-carrier-protein] reductase FabG	PF00106.24^adh_short^short chain dehydrogenase^3-206^E:2e-19`PF13561.5^adh_short_C2^Enoyl-(Acyl carrier protein) reductase^8-214^E:9.2e-15	ENOG410XNW1^)-reductase	KEGG:ecj:JW1079`KEGG:eco:b1093`KO:K00059	GO:0005829^cellular_component^cytosol`GO:0102131^molecular_function^3-oxo-glutaryl-[acp] methyl ester reductase activity`GO:0102132^molecular_function^3-oxo-pimeloyl-[acp] methyl ester reductase activity`GO:0004316^molecular_function^3-oxoacyl-[acyl-carrier-protein] reductase (NADPH) activity`GO:0042802^molecular_function^identical protein binding`GO:0046872^molecular_function^metal ion binding`G…	.
>LE01Gene13378	9.09678	10.0525	9.41344	11.829	12.3804	12.1401	2.55848	2.32e-05	7.51e-05	>LE01Gene13378	.	.	.	.	.	.
>LE01Gene09587	6.06631	6.53209	5.36983	8.55187	8.8727	8.3412	2.55705	2.12e-09	1.33e-08	>LE01Gene09587	HETE1_PODAS^HETE1_PODAS^Q:157-1188,H:277-641^20.2%ID^E:4.1e-08^RecName: Full=Vegetative incompatibility protein HET-E-1	.	.	.	.	.
>LE01Gene04941	6.31524	6.7544	6.12092	8.61176	9.78211	7.8014	2.55287	2.79e-09	1.74e-08	>LE01Gene04941	AIM6_ARTBC^AIM6_ARTBC^Q:53-985,H:1-313^39.6%ID^E:3.6e-59^RecName: Full=Altered inheritance of mitochondria protein 6 homolog ARB_06966 {ECO:0000305}	.	ENOG410XSXM^Secreted protein	KEGG:abe:ARB_06966	GO:0005576^cellular_component^extracellular region`GO:0008081^molecular_function^phosphoric diester hydrolase activity`GO:0006629^biological_process^lipid metabolic process	.
>LE01Gene13682	9.13714	8.90957	9.38325	11.722	11.7061	11.6793	2.54851	2.35e-26	1.81e-24	>LE01Gene13682	.	PF05721.12^PhyH^Phytanoyl-CoA dioxygenase (PhyH)^12-227^E:4.5e-09	.	.	.	.
>LE01Gene09806	4.71365	5.15749	3.81904	6.34825	7.60921	7.26558	2.54739	3.61e-06	1.36e-05	>LE01Gene09806	H4_AGABI^H4_AGABI^Q:1172-1101,H:80-103^91.7%ID^E:0.00012^RecName: Full=Histone H4	.	.	.	.	.
>LE01Gene01396	8.73204	9.02615	9.17998	11.4929	11.714	11.3675	2.54337	3.15e-35	7.37e-33	>LE01Gene01396	.	.	.	.	.	.
>LE01Gene05521	5.95783	5.83013	6.29782	8.83806	8.80261	7.8667	2.54334	2.97e-08	1.56e-07	>LE01Gene05521	.	.	.	.	.	.
>LE01Gene09129	11.1842	11.2937	11.5791	13.8406	14.006	13.8624	2.54327	9.06e-15	1.38e-13	>LE01Gene09129	TRNK1_MOUSE^TRNK1_MOUSE^Q:1862-4075,H:1222-1997^28.3%ID^E:2.2e-71^RecName: Full=TPR and ankyrin repeat-containing protein 1	PF13245.5^AAA_19^AAA domain^487-801^E:5.6e-06`PF00580.20^UvrD-helicase^UvrD/REP helicase N-terminal domain^652-798^E:6.3e-06`PF13361.5^UvrD_C^UvrD-like helicase C-terminal domain^937-1016^E:5.1e-07	ENOG410XUX5^Tetratricopeptide repeat and ankyrin repeat containing 1	KEGG:mmu:320429	.	GO:0005524^molecular_function^ATP binding`GO:0016787^molecular_function^hydrolase activity
>LE01Gene14776	5.38443	4.03722	5.89501	8.1429	7.61634	7.58564	2.54269	0.00137168	0.00315799	>LE01Gene14776	.	.	.	.	.	.
>LE01Gene11722	7.83386	8.0657	8.33897	10.4958	11.0658	10.185	2.53953	4.89e-16	9.06e-15	>LE01Gene11722	.	PF01370.20^Epimerase^NAD dependent epimerase/dehydratase family^8-241^E:7.5e-05	.	.	.	GO:0003824^molecular_function^catalytic activity`GO:0050662^molecular_function^coenzyme binding
>LE01Gene09819	6.06631	5.75489	4.91905	8.45902	8.10068	7.89827	2.53832	2.66e-12	2.68e-11	>LE01Gene09819	.	.	.	.	.	.
>LE01Gene06916	0	3.27392	4.18181	6.03486	5.65216	5.17469	2.53564	7.7e-05	0.000226064	>LE01Gene06916	.	.	.	.	.	.
>LE01Gene01084	9.13216	9.23205	9.41983	10.5687	12.3428	11.9559	2.53409	5.69e-13	6.41e-12	>LE01Gene01084	MF127_ASPFN^MF127_ASPFN^Q:699-2138,H:7-479^34.2%ID^E:3.1e-68^RecName: Full=MFS glucose transporter mfs1 {ECO:0000305}	PF00083.23^Sugar_tr^Sugar (and other) transporter^34-509^E:3.5e-117`PF07690.15^MFS_1^Major Facilitator Superfamily^39-339^E:9.8e-15	.	KEGG:afv:AFLA_082160	GO:0016021^cellular_component^integral component of membrane`GO:0022857^molecular_function^transmembrane transporter activity`GO:0008643^biological_process^carbohydrate transport	GO:0022857^molecular_function^transmembrane transporter activity`GO:0055085^biological_process^transmembrane transport`GO:0016021^cellular_component^integral component of membrane
>LE01Gene07841	9.63669	9.29979	9.36791	12.0137	12.372	11.3624	2.53352	3.7e-15	6.06e-14	>LE01Gene07841	.	.	.	.	.	.
>LE01Gene10253	9.85807	10.3581	10.306	12.4747	12.9174	12.738	2.53156	5.08e-25	3.16e-23	>LE01Gene10253	QORX_HUMAN^QORX_HUMAN^Q:116-1108,H:1-327^40.4%ID^E:1.3e-61^RecName: Full=Quinone oxidoreductase PIG3	PF08240.11^ADH_N^Alcohol dehydrogenase GroES-like domain^67-125^E:1.2e-07`PF00107.25^ADH_zinc_N^Zinc-binding dehydrogenase^190-317^E:5.6e-26`PF13602.5^ADH_zinc_N_2^Zinc-binding dehydrogenase^226-369^E:1.9e-14	COG0604^alcohol dehydrogenase	KEGG:hsa:9540`KO:K10133	GO:0005829^cellular_component^cytosol`GO:0070402^molecular_function^NADPH binding`GO:0003960^molecular_function^NADPH:quinone reductase activity`GO:0042803^molecular_function^protein homodimerization activity`GO:0048038^molecular_function^quinone binding`GO:0006739^biological_process^NADP metabolic process`GO:0042981^biological_process^regulation of apoptotic process	GO:0055114^biological_process^oxidation-reduction process
>LE01Gene07874	7.60123	7.57619	7.85173	10.3094	10.2477	10.0509	2.53111	2.17e-22	9.38e-21	>LE01Gene07874	.	.	.	.	.	.
>LE01Gene07514	13.6038	12.7818	13.5872	16.2799	15.6397	15.6972	2.53081	7.76e-13	8.55e-12	>LE01Gene07514	.	PF12585.7^DUF3759^Protein of unknown function (DUF3759)^13-101^E:1.4e-39	.	.	.	.
>LE01Gene13630	6.27963	5.59151	6.18233	8.39228	8.93384	8.25114	2.5271	1.85e-09	1.17e-08	>LE01Gene13630	.	.	.	.	.	.
>LE01Gene02855	10.3887	12.4709	12.6582	13.1153	15.3427	14.7331	2.5265	7.47e-06	2.63e-05	>LE01Gene02855	.	.	.	.	.	.
>LE01Gene10268	7.13736	6.21406	7.07858	9.32005	9.58744	9.20399	2.52353	4.33e-21	1.58e-19	>LE01Gene10268	.	PF13673.6^Acetyltransf_10^Acetyltransferase (GNAT) domain^129-201^E:3.7e-06	.	.	.	.
>LE01Gene06727	8.67836	8.36879	9.16231	10.7027	11.7284	11.2719	2.52286	1.54e-08	8.49e-08	>LE01Gene06727	OPT3_ARATH^OPT3_ARATH^Q:636-2744,H:24-722^31.1%ID^E:5.3e-73^RecName: Full=Oligopeptide transporter 3	PF03169.14^OPT^OPT oligopeptide transporter protein^73-728^E:1.9e-133	ENOG410XNZC^oligo-peptide transporter	KEGG:ath:AT4G16370	GO:0016021^cellular_component^integral component of membrane`GO:0016020^cellular_component^membrane`GO:0005886^cellular_component^plasma membrane`GO:0009506^cellular_component^plasmodesma`GO:0046915^molecular_function^transition metal ion transmembrane transporter activity`GO:0006875^biological_process^cellular metal ion homeostasis`GO:0055072^biological_process^iron ion homeostasis`GO:0007275^bi…	GO:0055085^biological_process^transmembrane transport
>LE01Gene04265	6.60145	8.14642	6.84536	10.0941	10.0182	9.45817	2.52274	1.53e-08	8.44e-08	>LE01Gene04265	AGN1_SCHPO^AGN1_SCHPO^Q:354-1562,H:24-422^35.6%ID^E:7e-59^RecName: Full=Glucan endo-1,3-alpha-glucosidase agn1	.	.	.	.	.
>LE01Gene03308	5.57275	4.90251	6.12092	8.06438	8.52074	7.59337	2.51857	1.65e-06	6.58e-06	>LE01Gene03308	.	.	.	.	.	.
>LE01Gene04311	7.1669	6.81739	6.40475	9.5714	9.91947	7.72598	2.51853	1.34e-07	6.36e-07	>LE01Gene04311	.	.	.	.	.	.
>LE01Gene10094	7.60123	7.44671	7.55941	10.0115	10.1245	10.0067	2.51786	6.62e-35	1.49e-32	>LE01Gene10094	.	.	.	.	.	.
>LE01Gene11686	4.76606	5.80548	6.42182	7.98135	7.97885	8.78471	2.50804	7.39e-09	4.29e-08	>LE01Gene11686	.	.	.	.	.	.
>LE01Gene04060	9.50024	9.29979	9.81185	12.2906	12.0713	11.764	2.50684	2.44e-23	1.2e-21	>LE01Gene04060	ARD1_UROFA^ARD1_UROFA^Q:651-1307,H:132-348^62.1%ID^E:7.5e-74^RecName: Full=D-arabinitol dehydrogenase 1	PF08240.11^ADH_N^Alcohol dehydrogenase GroES-like domain^25-123^E:4e-33	.	KEGG:ag:CAH10835`KO:K17818	GO:0042995^cellular_component^cell projection`GO:0033709^molecular_function^D-arabinitol dehydrogenase, D-ribulose forming (NADP+) activity`GO:0052677^molecular_function^D-arabinitol dehydrogenase, D-xylulose forming (NADP+) activity`GO:0008270^molecular_function^zinc ion binding`GO:0005975^biological_process^carbohydrate metabolic process`GO:0055114^biological_process^oxidation-reduction process…	GO:0055114^biological_process^oxidation-reduction process
>LE01Gene13934	4.04717	1.96011	3.47087	5.81271	6.59511	3.50197	2.50243	9.7e-05	0.00027905	>LE01Gene13934	.	PF12937.6^F-box-like^F-box-like^107-180^E:1.7e-05	.	.	.	GO:0005515^molecular_function^protein binding
>LE01Gene12187	6.48119	6.70195	6.7129	9.049	9.36022	8.91081	2.4953	1.47e-07	6.92e-07	>LE01Gene12187	.	.	.	.	.	.
>LE01Gene00179	6.79043	7.18533	6.67067	8.05933	10.1381	9.25366	2.49416	4.5e-08	2.29e-07	>LE01Gene00179	.	.	.	.	.	.
>LE01Gene05813	7.53481	7.04499	7.23166	10.1343	9.42656	9.65953	2.49377	6.44e-15	1.01e-13	>LE01Gene05813	SFM1_YEAST^SFM1_YEAST^Q:77-691,H:5-203^36.2%ID^E:4.4e-32^RecName: Full=Protein arginine N-methyltransferase SFM1 {ECO:0000305|PubMed:22650761}	PF04252.12^RNA_Me_trans^Predicted SAM-dependent RNA methyltransferase^5-205^E:7.6e-74	.	KEGG:sce:YOR021C	GO:0005737^cellular_component^cytoplasm`GO:0035241^molecular_function^protein-arginine omega-N monomethyltransferase activity`GO:0018216^biological_process^peptidyl-arginine methylation	GO:0008168^molecular_function^methyltransferase activity
>LE01Gene03045	8.17647	8.65405	9.7824	11.7661	11.6808	10.9987	2.48863	2.38e-08	1.27e-07	>LE01Gene03045	YWRD_BACSU^YWRD_BACSU^Q:115-1764,H:5-522^37.1%ID^E:5.5e-83^RecName: Full=Glutathione hydrolase-like YwrD proenzyme	PF01019.20^G_glu_transpept^Gamma-glutamyltranspeptidase^49-576^E:2.5e-146	COG0405^gamma-glutamyltransferase activity	KEGG:bsu:BSU18410`KO:K00681	GO:0005576^cellular_component^extracellular region`GO:0036374^molecular_function^glutathione hydrolase activity`GO:0102953^molecular_function^hypoglycin A gamma-glutamyl transpeptidase activity`GO:0103068^molecular_function^leukotriene C4 gamma-glutamyl transferase activity`GO:0006750^biological_process^glutathione biosynthetic process`GO:0006751^biological_process^glutathione catabolic process	.
>LE01Gene11080	6.51221	6.25103	6.69896	8.65594	9.11323	9.10463	2.48773	2.78e-19	8.12e-18	>LE01Gene11080	.	.	.	.	.	.
>LE01Gene12865	7.99074	7.37314	7.99552	11.045	10.0369	9.2414	2.48596	5.72e-10	3.99e-09	>LE01Gene12865	.	.	.	.	.	.
>LE01Gene11952	7.03429	6.99137	7.45545	9.54995	9.71236	9.69052	2.48581	7.1e-37	1.77e-34	>LE01Gene11952	.	.	.	.	.	.
>LE01Gene02166	4.91275	5.43962	3.71206	6.78765	8.09559	6.45557	2.48529	5.28e-06	1.92e-05	>LE01Gene02166	.	.	.	.	.	.
>LE01Gene10197	5.98019	6.35659	5.18216	7.94346	9.25004	7.19615	2.48449	1.22e-07	5.83e-07	>LE01Gene10197	.	.	.	.	.	.
>LE01Gene09515	7.21483	8.14642	8.75738	10.2374	10.841	10.7957	2.48311	1.69e-16	3.3e-15	>LE01Gene09515	.	.	.	.	.	.
>LE01Gene04653	11.7058	11.17	11.8399	14.4397	14.3884	13.0183	2.481	1.55e-06	6.22e-06	>LE01Gene04653	CAN_HAEIN^CAN_HAEIN^Q:99-734,H:4-193^33.3%ID^E:1.2e-28^RecName: Full=Carbonic anhydrase 2	PF00484.18^Pro_CA^Carbonic anhydrase^64-236^E:3.9e-39`PF13460.5^NAD_binding_10^NAD(P)H-binding^263-473^E:1.1e-22	COG0288^carbonic anhydrase	KEGG:hin:HI1301`KO:K01673	GO:0004089^molecular_function^carbonate dehydratase activity`GO:0008270^molecular_function^zinc ion binding`GO:0015976^biological_process^carbon utilization	GO:0004089^molecular_function^carbonate dehydratase activity`GO:0008270^molecular_function^zinc ion binding
>LE01Gene12646	5.48166	5.72891	6.12092	7.86456	8.80884	7.89201	2.47986	1.19e-10	9.16e-10	>LE01Gene12646	OMT1_PHACR^OMT1_PHACR^Q:355-1932,H:28-469^34.6%ID^E:1.2e-72^RecName: Full=4-O-methyltransferase 1 {ECO:0000303|PubMed:26672450}	.	.	.	.	.
>LE01Gene09446	5.48166	6.42291	7.71296	9.47794	8.87863	9.44967	2.47969	1.51e-08	8.37e-08	>LE01Gene09446	PSIH_PSICU^PSIH_PSICU^Q:69-1523,H:1-505^37.1%ID^E:1.1e-102^RecName: Full=Tryptamine 4-monooxygenase	PF00067.21^p450^Cytochrome P450^39-457^E:1.1e-58	COG2124^Cytochrome p450	KEGG:cci:CC1G_03564	GO:0016021^cellular_component^integral component of membrane`GO:0020037^molecular_function^heme binding`GO:0005506^molecular_function^iron ion binding`GO:0004497^molecular_function^monooxygenase activity`GO:0016705^molecular_function^oxidoreductase activity, acting on paired donors, with incorporation or reduction of molecular oxygen	GO:0005506^molecular_function^iron ion binding`GO:0016705^molecular_function^oxidoreductase activity, acting on paired donors, with incorporation or reduction of molecular oxygen`GO:0020037^molecular_function^heme binding`GO:0055114^biological_process^oxidation-reduction process
>LE01Gene07488	5.48166	5.34018	5.87035	8.20369	7.92823	7.95342	2.47853	2.7e-16	5.2e-15	>LE01Gene07488	.	.	.	.	.	.
>LE01Gene08106	6.69903	7.01306	5.94311	9.2081	9.7837	7.20627	2.47163	1.88e-06	7.42e-06	>LE01Gene08106	.	.	.	.	.	.
>LE01Gene06771	7.44925	7.75416	8.43881	11.0816	10.0658	9.69592	2.46852	1.32e-06	5.34e-06	>LE01Gene06771	PEBP1_CANLF^PEBP1_CANLF^Q:215-700,H:1-167^29.2%ID^E:1.4e-07^RecName: Full=Phosphatidylethanolamine-binding protein 1	PF01161.19^PBP^Phosphatidylethanolamine-binding protein^79-204^E:5.1e-12	.	.	.	.
>LE01Gene14401	8.87312	8.75726	8.47607	11.2222	11.1523	11.152	2.46686	2.47e-35	5.9e-33	>LE01Gene14401	.	.	.	.	.	.
>LE01Gene05516	7.13736	7.06589	7.36123	9.54995	9.88302	9.4792	2.46327	5.32e-27	4.47e-25	>LE01Gene05516	RHMA_SALG2^RHMA_SALG2^Q:682-1488,H:20-258^30.9%ID^E:2.5e-31^RecName: Full=2-keto-3-deoxy-L-rhamnonate aldolase {ECO:0000255|HAMAP-Rule:MF_01290}	PF03328.13^HpcH_HpaI^HpcH/HpaI aldolase/citrate lyase family^35-285^E:2.7e-34	COG3836^Aldolase	KEGG:kpn:KPN_02650`KO:K12660	GO:0106099^molecular_function^2-keto-3-deoxy-L-rhamnonate aldolase activity`GO:0046872^molecular_function^metal ion binding	GO:0003824^molecular_function^catalytic activity
>LE01Gene04325	5.38443	4.19735	4.09931	6.19084	7.6375	7.13385	2.46286	0.000226512	0.000607933	>LE01Gene04325	MOCOS_SOLLC^MOCOS_SOLLC^Q:773-2230,H:3-455^30.1%ID^E:3.2e-37^RecName: Full=Molybdenum cofactor sulfurase {ECO:0000255|HAMAP-Rule:MF_03050}	PF00266.18^Aminotran_5^Aminotransferase class-V^223-532^E:1.2e-15	COG0520^cysteine desulfurase`COG3217^MOSC domain-containing protein	KEGG:sly:543832`KO:K15631	GO:0008265^molecular_function^Mo-molybdopterin cofactor sulfurase activity`GO:0102867^molecular_function^molybdenum cofactor sulfurtransferase activity`GO:0030151^molecular_function^molybdenum ion binding`GO:0030170^molecular_function^pyridoxal phosphate binding`GO:0006777^biological_process^Mo-molybdopterin cofactor biosynthetic process	.
>LE01Gene08540	6.29754	5.37409	6.26034	8.69555	8.66512	7.95942	2.46151	9.05e-14	1.18e-12	>LE01Gene08540	.	.	.	.	.	.
>LE01Gene08481	10.61	12.4758	11.0487	12.5085	14.8728	13.9464	2.46093	0.00266859	0.00576149	>LE01Gene08481	ERG_META2^ERG_META2^Q:531-896,H:290-426^29.7%ID^E:0.00028^RecName: Full=Delta(14)-sterol reductase {ECO:0000303|PubMed:25307054, ECO:0000312|EMBL:CCE23001.1}	PF06966.11^DUF1295^Protein of unknown function (DUF1295)^157-288^E:1.1e-17`PF01222.16^ERG4_ERG24^Ergosterol biosynthesis ERG4/ERG24 family^215-298^E:3.3e-06	.	.	.	GO:0016020^cellular_component^membrane
>LE01Gene08231	9.39809	9.52783	9.46583	12.4757	11.7383	11.3047	2.45888	2.52e-08	1.34e-07	>LE01Gene08231	.	.	.	.	.	.
>LE01Gene08626	9.45307	9.58144	9.38107	11.3024	12.8111	10.9603	2.45723	3.97e-06	1.48e-05	>LE01Gene08626	PMP20_SCHPO^PMP20_SCHPO^Q:122-631,H:5-156^40%ID^E:1.5e-26^RecName: Full=Peroxisomal membrane associated protein 20	PF08534.9^Redoxin^Redoxin^39-194^E:3.7e-25`PF00578.20^AhpC-TSA^AhpC/TSA family^50-166^E:3.9e-09	COG0678^peroxiredoxin	KEGG:osa:4325511	GO:0005737^cellular_component^cytoplasm`GO:0004601^molecular_function^peroxidase activity`GO:0051920^molecular_function^peroxiredoxin activity`GO:0045454^biological_process^cell redox homeostasis	GO:0016491^molecular_function^oxidoreductase activity`GO:0016209^molecular_function^antioxidant activity`GO:0055114^biological_process^oxidation-reduction process
>LE01Gene10366	4.20737	3.65118	4.71254	6.85916	6.16088	6.81449	2.45707	1.05e-10	8.15e-10	>LE01Gene10366	.	.	.	.	.	.
>LE01Gene06830	3.42053	2.27934	2.332	5.46086	5.16156	4.29223	2.45437	0.000350122	0.000907198	>LE01Gene06830	.	.	.	.	.	.
>LE01Gene05505	8.9879	8.94102	8.88907	11.1509	11.2494	11.708	2.45297	1.04e-11	9.52e-11	>LE01Gene05505	.	.	.	.	.	.
>LE01Gene04547	5.16778	5.43962	5.74026	6.77538	8.74853	7.43877	2.45224	3.54e-06	1.33e-05	>LE01Gene04547	.	.	.	.	.	.
>LE01Gene07803	7.60123	7.786	8.15209	10.04	10.6838	10.1208	2.45144	1.05e-13	1.35e-12	>LE01Gene07803	ISP4_SCHPO^ISP4_SCHPO^Q:276-2447,H:67-782^42.5%ID^E:5.1e-167^RecName: Full=Sexual differentiation process protein isp4	PF03169.14^OPT^OPT oligopeptide transporter protein^74-729^E:9.4e-170	.	KEGG:spo:SPBC29B5.02c	GO:0005783^cellular_component^endoplasmic reticulum`GO:0005789^cellular_component^endoplasmic reticulum membrane`GO:0005794^cellular_component^Golgi apparatus`GO:0005887^cellular_component^integral component of plasma membrane`GO:0005886^cellular_component^plasma membrane`GO:1901584^molecular_function^tetrapeptide transmembrane transporter activity`GO:0015031^biological_process^protein transport`…	GO:0055085^biological_process^transmembrane transport
>LE01Gene07414	7.97969	8.4936	7.67785	10.9642	10.7757	9.4518	2.44897	5.17e-13	5.83e-12	>LE01Gene07414	.	.	.	.	.	.
>LE01Gene05313	7.97413	8.51656	8.24616	10.9154	11.2716	9.25854	2.44872	4.83e-06	1.77e-05	>LE01Gene05313	SPI_LENED^SPI_LENED^Q:707-1141,H:1-142^54.4%ID^E:4.2e-37^RecName: Full=Serine protease inhibitor	PF16850.4^Inhibitor_I66^Peptidase inhibitor I66^73-216^E:9.9e-37	.	.	GO:0004867^molecular_function^serine-type endopeptidase inhibitor activity	GO:0004867^molecular_function^serine-type endopeptidase inhibitor activity
>LE01Gene04029	7.92887	8.37299	8.88292	10.6055	11.1125	10.9132	2.44811	1.62e-17	3.63e-16	>LE01Gene04029	CYS3_NEUCR^CYS3_NEUCR^Q:983-1225,H:87-167^49.4%ID^E:3.3e-11^RecName: Full=Regulatory protein cys-3	PF07716.14^bZIP_2^Basic region leucine zipper^238-286^E:9.2e-09	.	.	GO:0005634^cellular_component^nucleus`GO:0003677^molecular_function^DNA binding`GO:0003700^molecular_function^DNA-binding transcription factor activity`GO:0006351^biological_process^transcription, DNA-templated	GO:0003700^molecular_function^DNA-binding transcription factor activity`GO:0006355^biological_process^regulation of transcription, DNA-templated
>LE01Gene07971	9.58474	9.39991	9.49032	11.9923	12.4143	11.1328	2.44691	1.4e-09	9.14e-09	>LE01Gene07971	GA1_GIBF5^GA1_GIBF5^Q:399-1106,H:8-298^25.5%ID^E:1.3e-12^RecName: Full=Gibberellin cluster GA4 desaturase {ECO:0000303|PubMed:12750377}	.	.	KEGG:afv:AFLA_023010	GO:0016491^molecular_function^oxidoreductase activity	.
>LE01Gene05703	7.96295	8.42245	8.53611	10.9119	11.1657	9.98037	2.44493	4.85e-09	2.92e-08	>LE01Gene05703	.	.	.	.	.	.
>LE01Gene08541	8.26107	8.18515	8.42193	11.1008	10.7797	10.1721	2.44476	6.16e-16	1.11e-14	>LE01Gene08541	SET5_ASHGO^SET5_ASHGO^Q:364-582,H:336-407^37.8%ID^E:4.5e-09^RecName: Full=Potential protein lysine methyltransferase SET5	PF00856.27^SET^SET domain^7-166^E:4.6e-11	COG2940^Histone-lysine N-methyltransferase	KEGG:hsa:150572`KO:K11426	GO:0005737^cellular_component^cytoplasm`GO:0005634^cellular_component^nucleus`GO:0003677^molecular_function^DNA binding`GO:0018024^molecular_function^histone-lysine N-methyltransferase activity`GO:0046872^molecular_function^metal ion binding`GO:0003714^molecular_function^transcription corepressor activity`GO:0006338^biological_process^chromatin remodeling`GO:0007507^biological_process^heart devel…	GO:0005515^molecular_function^protein binding
>LE01Gene08460	10.067	11.2366	11.6218	13.2268	13.8482	13.5173	2.44232	1.82e-10	1.37e-09	>LE01Gene08460	PEPS_ARTBC^PEPS_ARTBC^Q:327-1700,H:50-522^45.9%ID^E:1.2e-122^RecName: Full=Probable serine carboxypeptidase ARB_06414 {ECO:0000305}	PF00450.21^Peptidase_S10^Serine carboxypeptidase^86-501^E:4.8e-72	COG2939^carboxy-peptidase	KEGG:abe:ARB_06414`KO:K01288	GO:0005576^cellular_component^extracellular region`GO:0004185^molecular_function^serine-type carboxypeptidase activity	GO:0004185^molecular_function^serine-type carboxypeptidase activity`GO:0006508^biological_process^proteolysis
>LE01Gene02639	7.53481	7.79229	8.15209	10.7019	9.83803	10.1669	2.43676	6.89e-10	4.75e-09	>LE01Gene02639	XYNA_PHACH^XYNA_PHACH^Q:177-1091,H:95-400^63.8%ID^E:5.4e-116^RecName: Full=Endo-1,4-beta-xylanase A	PF00331.19^Glyco_hydro_10^Glycosyl hydrolase family 10^45-347^E:1.6e-96	COG3693^hydrolase family 10	.	GO:0005576^cellular_component^extracellular region`GO:0030248^molecular_function^cellulose binding`GO:0031176^molecular_function^endo-1,4-beta-xylanase activity`GO:0045493^biological_process^xylan catabolic process	GO:0004553^molecular_function^hydrolase activity, hydrolyzing O-glycosyl compounds`GO:0005975^biological_process^carbohydrate metabolic process
>LE01Gene00455	11.2842	11.5002	11.4006	14.0227	13.8483	13.5905	2.43406	4.46e-15	7.22e-14	>LE01Gene00455	.	.	.	.	.	.
>LE01Gene02715	4.65927	5.78041	5.79371	6.17224	8.12585	8.52233	2.43181	1.07e-05	3.66e-05	>LE01Gene02715	.	.	.	.	.	.
>LE01Gene06423	9.18605	9.05519	9.72337	11.394	11.8629	12.0165	2.43158	3.91e-11	3.27e-10	>LE01Gene06423	CARP4_RHINI^CARP4_RHINI^Q:230-1000,H:78-326^33.6%ID^E:9.3e-27^RecName: Full=Rhizopuspepsin-4	PF00026.22^Asp^Eukaryotic aspartyl protease^59-380^E:5.4e-43	.	.	GO:0004190^molecular_function^aspartic-type endopeptidase activity	.
>LE01Gene02854	10.9055	11.6119	10.8135	13.7761	13.3353	13.6148	2.43074	8.88e-11	7.03e-10	>LE01Gene02854	RL8_SCHPO^RL8_SCHPO^Q:74-850,H:1-257^63.8%ID^E:3.9e-85^RecName: Full=60S ribosomal protein L8	PF01248.25^Ribosomal_L7Ae^Ribosomal protein L7Ae/L30e/S12e/Gadd45 family^128-205^E:2.1e-21	.	KEGG:spo:SPBC29A3.04`KO:K02936	GO:0022625^cellular_component^cytosolic large ribosomal subunit`GO:0003723^molecular_function^RNA binding`GO:0003735^molecular_function^structural constituent of ribosome`GO:0002181^biological_process^cytoplasmic translation`GO:0000470^biological_process^maturation of LSU-rRNA`GO:0006412^biological_process^translation	.
>LE01Gene07160	5.16778	5.96977	4.5356	8.06942	7.6375	7.46431	2.43037	1.67e-12	1.73e-11	>LE01Gene07160	.	.	.	.	.	.
>LE01Gene12739	10.8042	11.1259	11.2456	13.6773	13.5462	13.224	2.42506	2.22e-17	4.85e-16	>LE01Gene12739	ZNFX1_MOUSE^ZNFX1_MOUSE^Q:931-3792,H:320-1344^26.5%ID^E:2.7e-83^RecName: Full=NFX1-type zinc finger-containing protein 1	PF13086.5^AAA_11^AAA domain^466-794^E:4.6e-23`PF13245.5^AAA_19^AAA domain^477-791^E:8.7e-07`PF13087.5^AAA_12^AAA domain^809-1026^E:1.9e-38`PF00004.28^AAA^ATPase family associated with various cellular activities (AAA)^1348-1455^E:1.8e-10`PF00004.28^AAA^ATPase family associated with various cellular activities (AAA)^1628-1743^E:2.8e-07`PF00004.28^AAA^ATPase family associated with various cellular …	COG1112^Helicase	KEGG:mmu:98999	GO:0005634^cellular_component^nucleus`GO:0003700^molecular_function^DNA-binding transcription factor activity`GO:0008270^molecular_function^zinc ion binding	GO:0005524^molecular_function^ATP binding
>LE01Gene03129	8.26563	10.273	11.5966	13.5291	13.124	12.0154	2.42346	6.34e-05	0.000189318	>LE01Gene03129	.	.	.	.	.	.
>LE01Gene11694	7.89397	6.7544	8.61988	10.4199	10.6009	10.0023	2.42244	1.49e-07	7.02e-07	>LE01Gene11694	YQK1_SCHPO^YQK1_SCHPO^Q:506-1300,H:19-278^31.9%ID^E:8e-27^RecName: Full=UPF0676 protein C1494.01	.	.	.	.	.
>LE01Gene07630	10.6393	9.81235	10.9277	12.823	13.6492	11.8545	2.42235	5.46e-06	1.98e-05	>LE01Gene07630	PSID_PSICU^PSID_PSICU^Q:6-926,H:128-438^37.2%ID^E:9.7e-49^RecName: Full=L-tryptophan decarboxylase {ECO:0000303|PubMed:28763571}	.	.	.	.	.
>LE01Gene00739	7.54234	8.67801	8.76074	10.6296	11.2912	10.4582	2.4199	1.4e-08	7.82e-08	>LE01Gene00739	PNAA_PRUDU^PNAA_PRUDU^Q:277-1359,H:10-377^32.6%ID^E:1.6e-46^RecName: Full=Peptide-N4-(N-acetyl-beta-glucosaminyl)asparagine amidase A	PF12222.7^PNGaseA^Peptide N-acetyl-beta-D-glucosaminyl asparaginase amidase A^33-450^E:1.5e-129	.	.	GO:0000224^molecular_function^peptide-N4-(N-acetyl-beta-glucosaminyl)asparagine amidase activity	.
>LE01Gene09828	11.7504	11.5723	12.0273	14.2394	13.9405	14.4209	2.41843	5.14e-26	3.67e-24	>LE01Gene09828	.	.	.	.	.	.
>LE01Gene07665	6.44949	7.36473	8.18746	9.39616	10.0475	10.1811	2.41843	1.72e-07	8e-07	>LE01Gene07665	.	.	.	.	.	.
>LE01Gene11870	10.4022	10.2697	11.3871	13.5308	12.6684	13.256	2.41794	9.1e-07	3.77e-06	>LE01Gene11870	FNX2_SCHPO^FNX2_SCHPO^Q:501-2066,H:85-577^40.6%ID^E:8.2e-97^RecName: Full=Vacuolar membrane amino acid uptake transporter fnx2	.	.	.	.	.
>LE01Gene12571	6.20565	5.99178	5.50415	9.049	8.07505	7.34105	2.4142	2.59e-08	1.37e-07	>LE01Gene12571	UFOG1_MAIZE^UFOG1_MAIZE^Q:1368-2012,H:283-466^30.1%ID^E:1.1e-16^RecName: Full=Anthocyanidin 3-O-glucosyltransferase	PF00201.17^UDPGT^UDP-glucoronosyl and UDP-glucosyl transferase^329-452^E:7e-15	COG1819^Transferase	KEGG:ath:AT1G07240	GO:0005829^cellular_component^cytosol`GO:0043231^cellular_component^intracellular membrane-bounded organelle`GO:0010294^molecular_function^abscisic acid glucosyltransferase activity`GO:0080043^molecular_function^quercetin 3-O-glucosyltransferase activity`GO:0080044^molecular_function^quercetin 7-O-glucosyltransferase activity`GO:1902265^biological_process^abscisic acid homeostasis`GO:0009687^biol…	GO:0016758^molecular_function^transferase activity, transferring hexosyl groups
>LE01Gene07845	8.03413	8.26415	8.31632	10.8409	10.4606	10.5275	2.41349	2.45e-20	8.26e-19	>LE01Gene07845	YEMB_SCHPO^YEMB_SCHPO^Q:204-530,H:50-160^28.9%ID^E:3e-05^RecName: Full=UPF0664 stress-induced protein C29B12.11c	PF02893.19^GRAM^GRAM domain^64-117^E:4.6e-05	.	.	.	.
>LE01Gene05836	8.20522	8.56141	8.25094	10.6064	11.1796	10.3596	2.41271	2.97e-16	5.68e-15	>LE01Gene05836	SAT3_STACB^SAT3_STACB^Q:180-971,H:1-271^28.4%ID^E:1.6e-12^RecName: Full=Short-chain dehydrogenase/reductase SAT3 {ECO:0000303|PubMed:25015739}	PF00106.24^adh_short^short chain dehydrogenase^37-239^E:2e-19`PF13561.5^adh_short_C2^Enoyl-(Acyl carrier protein) reductase^38-298^E:1.2e-15	.	.	.	.
>LE01Gene09454	7.03429	6.71525	8.34793	10.1186	9.78844	9.93085	2.40968	4.71e-07	2.04e-06	>LE01Gene09454	.	.	.	.	.	.
>LE01Gene03131	11.0453	10.3895	11.598	13.7857	13.1782	13.4634	2.40437	2.62e-14	3.73e-13	>LE01Gene03131	HMF1_YEAST^HMF1_YEAST^Q:103-420,H:21-126^52.8%ID^E:3.7e-24^RecName: Full=Protein HMF1	PF01042.20^Ribonuc_L-PSP^Endoribonuclease L-PSP^34-140^E:8.6e-36	.	KEGG:sce:YER057C	GO:0005737^cellular_component^cytoplasm`GO:0005829^cellular_component^cytosol`GO:0005758^cellular_component^mitochondrial intermembrane space`GO:0005634^cellular_component^nucleus	.
>LE01Gene14244	7.23356	6.84184	6.18233	9.05662	9.55444	8.92927	2.40095	1.25e-09	8.22e-09	>LE01Gene14244	Y5521_DICDI^Y5521_DICDI^Q:493-1041,H:614-816^26.5%ID^E:1.4e-14^RecName: Full=Uncharacterized protein DDB_G0292642	.	.	.	.	.
>LE01Gene06074	5.63043	5.30544	6.64181	7.61888	8.65131	8.58963	2.40067	2.09e-10	1.55e-09	>LE01Gene06074	.	.	.	.	.	.
>LE01Gene01844	11.5529	11.6779	11.7494	13.354	13.9466	14.6108	2.39911	7.29e-11	5.83e-10	>LE01Gene01844	AGALB_NEOFI^AGALB_NEOFI^Q:1117-2337,H:3-443^41.5%ID^E:8.5e-90^RecName: Full=Probable alpha-galactosidase B	.	.	.	GO:0005576^cellular_component^extracellular region`GO:0052692^molecular_function^raffinose alpha-galactosidase activity`GO:0005975^biological_process^carbohydrate metabolic process	.
>LE01Gene09060	7.45724	7.72817	7.84542	9.50792	10.6872	9.74537	2.39446	1.93e-05	6.34e-05	>LE01Gene09060	PEM2_PHLRA^PEM2_PHLRA^Q:1-1191,H:1-374^62.3%ID^E:8.5e-133^RecName: Full=Manganese peroxidase 2	PF00141.22^peroxidase^Peroxidase^55-307^E:3.5e-27`PF11895.7^Peroxidase_ext^Fungal peroxidase extension region^313-389^E:1.9e-30	.	KEGG:ag:CAC85963`KO:K20205	GO:0005576^cellular_component^extracellular region`GO:0020037^molecular_function^heme binding`GO:0016689^molecular_function^manganese peroxidase activity`GO:0046872^molecular_function^metal ion binding`GO:0042744^biological_process^hydrogen peroxide catabolic process`GO:0046274^biological_process^lignin catabolic process`GO:0006979^biological_process^response to oxidative stress	GO:0004601^molecular_function^peroxidase activity`GO:0020037^molecular_function^heme binding`GO:0006979^biological_process^response to oxidative stress`GO:0055114^biological_process^oxidation-reduction process
>LE01Gene05865	10.0552	9.8625	10.3072	12.3162	12.6534	12.4495	2.39431	1.32e-10	1.01e-09	>LE01Gene05865	FLS_MALDO^FLS_MALDO^Q:88-819,H:41-280^27.2%ID^E:8.7e-19^RecName: Full=Flavonol synthase/flavanone 3-hydroxylase	PF14226.5^DIOX_N^non-haem dioxygenase in morphine synthesis N-terminal^29-134^E:3.2e-17`PF03171.19^2OG-FeII_Oxy^2OG-Fe(II) oxygenase superfamily^193-293^E:5.3e-14	.	.	.	GO:0016491^molecular_function^oxidoreductase activity`GO:0055114^biological_process^oxidation-reduction process
>LE01Gene06058	6.06631	5.78041	5.62703	8.30106	8.0224	8.28975	2.39403	1.52e-09	9.83e-09	>LE01Gene06058	.	.	.	.	.	.
>LE01Gene13857	5.57275	6.43902	6.87045	8.78396	7.97331	9.26339	2.39245	7.92e-09	4.58e-08	>LE01Gene13857	.	.	.	.	.	.
>LE01Gene09599	5.6859	3.85708	3.71206	6.90494	7.26395	7.01214	2.39074	2.46e-09	1.54e-08	>LE01Gene09599	HETE1_PODAS^HETE1_PODAS^Q:298-1659,H:297-748^23.9%ID^E:1e-12^RecName: Full=Vegetative incompatibility protein HET-E-1	PF05729.11^NACHT^NACHT domain^100-270^E:1e-08`PF00400.31^WD40^WD domain, G-beta repeat^644-672^E:0.003`PF00400.31^WD40^WD domain, G-beta repeat^682-715^E:1e-07`PF00400.31^WD40^WD domain, G-beta repeat^726-756^E:0.013`PF00400.31^WD40^WD domain, G-beta repeat^769-801^E:1.7e-07`PF00400.31^WD40^WD domain, G-beta repeat^812-844^E:3.6e-09`PF00400.31^WD40^WD domain, G-beta repeat^854-887^E:4.4e-06`PF004…	.	.	.	GO:0005515^molecular_function^protein binding
>LE01Gene00952	9.974	9.65571	9.89826	12.0186	12.4916	12.1605	2.38977	1.13e-19	3.46e-18	>LE01Gene00952	.	.	.	.	.	.
>LE01Gene09718	4.81663	4.90251	5.74026	7.35594	7.9225	7.35932	2.38802	1.68e-06	6.69e-06	>LE01Gene09718	IIGP1_MOUSE^IIGP1_MOUSE^Q:254-730,H:43-208^28.1%ID^E:2.1e-11^RecName: Full=Interferon-inducible GTPase 1	PF05049.12^IIGP^Interferon-inducible GTPase (IIGP)^8-162^E:5.7e-20`PF01926.22^MMR_HSR1^50S ribosome-binding GTPase^14-72^E:5.9e-06	ENOG41125KF^Immunity-related GTPase family	KEGG:bta:539080	GO:0016020^cellular_component^membrane`GO:0005525^molecular_function^GTP binding`GO:0003924^molecular_function^GTPase activity	GO:0005525^molecular_function^GTP binding`GO:0016020^cellular_component^membrane
>LE01Gene08405	3.95987	5.19592	6.2792	7.63255	6.84599	8.46022	2.3857	0.000171306	0.000469024	>LE01Gene08405	PCPB_SPHCR^PCPB_SPHCR^Q:25-1260,H:17-395^28.7%ID^E:2.2e-25^RecName: Full=Pentachlorophenol 4-monooxygenase	PF01494.18^FAD_binding_3^FAD binding domain^7-375^E:5.8e-52	COG0654^oxidoreductase activity, acting on paired donors, with incorporation or reduction of molecular oxygen, NAD(P)H as one donor, and incorporation of one atom of oxygen	KEGG:bsu:BSU10500	GO:0071949^molecular_function^FAD binding`GO:0004497^molecular_function^monooxygenase activity`GO:0019439^biological_process^aromatic compound catabolic process	GO:0071949^molecular_function^FAD binding
>LE01Gene11426	6.1672	5.70246	5.33419	6.29766	8.87567	8.21649	2.3852	7.62e-05	0.000223961	>LE01Gene11426	.	.	.	.	.	.
>LE01Gene07156	8.98238	9.16582	10.9529	11.4184	12.0037	13.1541	2.38288	8.63e-07	3.59e-06	>LE01Gene07156	AMID_PSECL^AMID_PSECL^Q:197-1588,H:6-467^42.1%ID^E:1.4e-88^RecName: Full=Amidase	PF01425.20^Amidase^Amidase^94-481^E:1.4e-77	.	.	GO:0004040^molecular_function^amidase activity`GO:0043864^molecular_function^indoleacetamide hydrolase activity	.
>LE01Gene04148	6.55752	5.62005	6.68488	8.73411	8.76144	8.68323	2.38255	3.48e-10	2.51e-09	>LE01Gene04148	.	.	.	.	.	.
>LE01Gene08018	8.7933	9.65915	9.48424	11.2154	11.6568	12.1766	2.38031	5.88e-16	1.07e-14	>LE01Gene08018	EOGT_DROME^EOGT_DROME^Q:1652-2056,H:348-471^30.4%ID^E:1.4e-05^RecName: Full=EGF domain-specific O-linked N-acetylglucosamine transferase	.	.	.	.	.
>LE01Gene14852	4.81663	5.118	5.62703	6.92729	7.29979	8.19122	2.37885	8.9e-08	4.33e-07	>LE01Gene14852	.	.	.	.	.	.
>LE01Gene03652	8.06584	7.786	8.084	10.8423	10.2046	9.84919	2.37837	2.31e-13	2.78e-12	>LE01Gene03652	BACC_BACSU^BACC_BACSU^Q:258-1031,H:1-249^29.5%ID^E:6.7e-17^RecName: Full=Dihydroanticapsin 7-dehydrogenase {ECO:0000303|PubMed:23317005}	PF00106.24^adh_short^short chain dehydrogenase^11-211^E:4.9e-40`PF08659.9^KR^KR domain^12-172^E:1.7e-07`PF13561.5^adh_short_C2^Enoyl-(Acyl carrier protein) reductase^16-263^E:2.2e-38	ENOG410XNW1^)-reductase	KEGG:bsu:BSU37720`KO:K19548	GO:0016491^molecular_function^oxidoreductase activity`GO:0017000^biological_process^antibiotic biosynthetic process	.
>LE01Gene00220	13.7365	12.7537	14.7113	15.7562	16.2287	16.7984	2.37707	7.2e-10	4.94e-09	>LE01Gene00220	.	.	.	.	.	.
>LE01Gene05698	8.67836	9.31078	9.7574	11.7668	11.9557	11.2507	2.37463	3.6e-08	1.86e-07	>LE01Gene05698	.	.	.	.	.	.
>LE01Gene06463	6.69903	6.42291	7.36123	9.99701	8.60551	8.6796	2.37319	5.94e-06	2.14e-05	>LE01Gene06463	PRLL_FUNXX^PRLL_FUNXX^Q:610-1779,H:41-436^31%ID^E:5e-43^RecName: Full=MFS transporter prlL {ECO:0000303|PubMed:25226362}	.	.	.	.	.
>LE01Gene04902	12.9787	12.578	13.3496	15.6294	15.2234	15.2257	2.36979	1.12e-23	5.84e-22	>LE01Gene04902	ALF_NEUCR^ALF_NEUCR^Q:28-1095,H:1-360^70%ID^E:1.9e-148^RecName: Full=Fructose-bisphosphate aldolase	PF01116.19^F_bP_aldolase^Fructose-bisphosphate aldolase class-II^25-365^E:3.1e-93	.	KEGG:ncr:NCU07807`KO:K01624	GO:0005829^cellular_component^cytosol`GO:0009277^cellular_component^fungal-type cell wall`GO:0005739^cellular_component^mitochondrion`GO:0005886^cellular_component^plasma membrane`GO:0004332^molecular_function^fructose-bisphosphate aldolase activity`GO:0008270^molecular_function^zinc ion binding`GO:0006094^biological_process^gluconeogenesis`GO:0006096^biological_process^glycolytic process	GO:0008270^molecular_function^zinc ion binding`GO:0016832^molecular_function^aldehyde-lyase activity`GO:0005975^biological_process^carbohydrate metabolic process
>LE01Gene02418	9.99474	9.97728	9.70953	11.7583	12.8933	11.8565	2.36797	4.61e-14	6.33e-13	>LE01Gene02418	N6235_COPC7^N6235_COPC7^Q:45-1610,H:3-519^49.1%ID^E:2e-148^RecName: Full=Adenylate-forming reductase 06235	.	.	.	.	.
>LE01Gene04260	7.49655	8.36457	8.47198	9.67577	10.8372	10.8116	2.36494	3.47e-12	3.41e-11	>LE01Gene04260	.	.	.	.	.	.
>LE01Gene04703	5.54302	5.34018	4.4043	8.28817	7.29091	6.23592	2.36229	3.21e-05	0.000101196	>LE01Gene04703	.	.	.	.	.	.
>LE01Gene00892	7.53481	6.39013	7.22195	9.6356	9.55444	9.19639	2.35859	7.69e-11	6.13e-10	>LE01Gene00892	.	.	.	.	.	.
>LE01Gene12584	3.76761	5.0774	4.767	6.59163	7.3689	6.76053	2.35826	0.000168411	0.000461531	>LE01Gene12584	.	.	.	.	.	.
>LE01Gene12420	6.82789	8.56141	6.61236	10.1355	10.625	8.23639	2.3565	2.6e-05	8.36e-05	>LE01Gene12420	.	PF01753.17^zf-MYND^MYND finger^454-493^E:9.3e-08	.	.	.	.
>LE01Gene07597	9.48078	9.66259	9.1263	11.4826	12.3094	11.4081	2.35588	2.66e-06	1.03e-05	>LE01Gene07597	.	.	.	.	.	.
>LE01Gene05977	4.71365	6.32226	5.05659	7.612	8.14075	7.80806	2.35453	5.1e-09	3.05e-08	>LE01Gene05977	NUP3_PENSQ^NUP3_PENSQ^Q:1054-1797,H:56-261^36.9%ID^E:4.2e-36^RecName: Full=Nuclease PA3	PF02265.15^S1-P1_nuclease^S1/P1 Nuclease^3-61^E:4e-08`PF02265.15^S1-P1_nuclease^S1/P1 Nuclease^85-253^E:1.1e-30	.	.	GO:0005576^cellular_component^extracellular region`GO:0008254^molecular_function^3'-nucleotidase activity`GO:0004519^molecular_function^endonuclease activity`GO:0046872^molecular_function^metal ion binding`GO:0003676^molecular_function^nucleic acid binding`GO:0006308^biological_process^DNA catabolic process	GO:0003676^molecular_function^nucleic acid binding`GO:0004519^molecular_function^endonuclease activity`GO:0006308^biological_process^DNA catabolic process
>LE01Gene04596	5.48166	5.40723	6.45538	8.02346	8.25469	8.2945	2.35163	2.53e-07	1.15e-06	>LE01Gene04596	.	.	.	.	.	.
>LE01Gene02966	6.58695	6.53209	7.13143	9.13074	9.18446	9.01818	2.34796	6.64e-19	1.85e-17	>LE01Gene02966	IML2_COPC7^IML2_COPC7^Q:316-2529,H:14-719^46.2%ID^E:1.5e-164^RecName: Full=Inclusion body clearance protein IML2	PF10300.8^DUF3808^Protein of unknown function (DUF3808)^72-633^E:2.7e-70	ENOG410Y5QW^mitochondrial outer membrane protein IML2	KEGG:cci:CC1G_04079	GO:0005737^cellular_component^cytoplasm`GO:0005634^cellular_component^nucleus	.
>LE01Gene02025	7.11733	7.75416	7.57476	9.99304	9.95923	9.53851	2.34488	4.93e-10	3.48e-09	>LE01Gene02025	DHPSL_METJA^DHPSL_METJA^Q:34-843,H:31-281^33.9%ID^E:6.1e-17^RecName: Full=7,8-dihydropterin-6-methyl-4-(beta-D-ribofuranosyl)-aminobenzene-5'-phosphate synthase	PF00753.26^Lactamase_B^Metallo-beta-lactamase superfamily^16-93^E:3.8e-08	.	.	.	.
>LE01Gene11932	6.80302	6.26917	5.89501	7.09467	9.2035	9.02677	2.34285	1.64e-05	5.46e-05	>LE01Gene11932	COX2_COPC7^COX2_COPC7^Q:64-1122,H:25-384^30.9%ID^E:2.4e-51^RecName: Full=Cytochrome P450 monooxygenase COX2 {ECO:0000303|PubMed:19400802}	PF00067.21^p450^Cytochrome P450^38-373^E:1.6e-38	COG2124^Cytochrome p450	KEGG:cci:CC1G_03564	GO:0016021^cellular_component^integral component of membrane`GO:0020037^molecular_function^heme binding`GO:0005506^molecular_function^iron ion binding`GO:0004497^molecular_function^monooxygenase activity`GO:0016705^molecular_function^oxidoreductase activity, acting on paired donors, with incorporation or reduction of molecular oxygen	GO:0005506^molecular_function^iron ion binding`GO:0016705^molecular_function^oxidoreductase activity, acting on paired donors, with incorporation or reduction of molecular oxygen`GO:0020037^molecular_function^heme binding`GO:0055114^biological_process^oxidation-reduction process
>LE01Gene04257	5.28017	4.47249	5.29766	7.19942	7.79017	7.00055	2.34258	4.09e-11	3.4e-10	>LE01Gene04257	HETE1_PODAS^HETE1_PODAS^Q:259-1215,H:277-623^18.5%ID^E:1.4e-06^RecName: Full=Vegetative incompatibility protein HET-E-1	PF05729.11^NACHT^NACHT domain^105-205^E:3.1e-08`PF12796.6^Ank_2^Ankyrin repeats (3 copies)^521-614^E:1.7e-09`PF00023.29^Ank^Ankyrin repeat^554-581^E:0.013`PF13637.5^Ank_4^Ankyrin repeats (many copies)^588-638^E:4.7e-10`PF12796.6^Ank_2^Ankyrin repeats (3 copies)^589-681^E:1.9e-15`PF13637.5^Ank_4^Ankyrin repeats (many copies)^653-705^E:4.4e-08`PF00023.29^Ank^Ankyrin repeat^653-681^E:0.003`PF12796.6…	.	.	.	GO:0005515^molecular_function^protein binding
>LE01Gene06379	8.76461	8.89504	9.11585	11.5664	11.2811	10.8906	2.34221	6.73e-14	8.95e-13	>LE01Gene06379	HPRT_SCHPO^HPRT_SCHPO^Q:31-609,H:7-199^48.7%ID^E:1e-41^RecName: Full=Hypoxanthine-guanine phosphoribosyltransferase	.	.	KEGG:spo:SPAC23C11.13c`KO:K07101	GO:0005737^cellular_component^cytoplasm`GO:0005783^cellular_component^endoplasmic reticulum`GO:0005634^cellular_component^nucleus`GO:0052657^molecular_function^guanine phosphoribosyltransferase activity`GO:0004422^molecular_function^hypoxanthine phosphoribosyltransferase activity`GO:0046872^molecular_function^metal ion binding`GO:0000166^molecular_function^nucleotide binding`GO:0016763^molecular_…	.
>LE01Gene06505	11.089	12.1823	11.5891	13.746	13.8478	14.4026	2.33983	1.67e-10	1.26e-09	>LE01Gene06505	CP67_UROFA^CP67_UROFA^Q:345-1961,H:4-536^32.4%ID^E:8.5e-64^RecName: Full=Cytochrome P450 67	PF00067.21^p450^Cytochrome P450^151-567^E:2e-56	.	.	GO:0020037^molecular_function^heme binding`GO:0005506^molecular_function^iron ion binding`GO:0004497^molecular_function^monooxygenase activity`GO:0016705^molecular_function^oxidoreductase activity, acting on paired donors, with incorporation or reduction of molecular oxygen	GO:0005506^molecular_function^iron ion binding`GO:0016705^molecular_function^oxidoreductase activity, acting on paired donors, with incorporation or reduction of molecular oxygen`GO:0020037^molecular_function^heme binding`GO:0055114^biological_process^oxidation-reduction process
>LE01Gene00946	7.44925	8.27316	8.32088	10.7481	10.0749	10.2946	2.33887	1.91e-06	7.53e-06	>LE01Gene00946	GUS79_ASPNC^GUS79_ASPNC^Q:175-1743,H:31-541^26%ID^E:7e-26^RecName: Full=Beta-glucuronidase {ECO:0000303|PubMed:18377882}	.	.	.	.	.
>LE01Gene04347	11.9427	10.4603	11.386	14.5378	13.554	12.1827	2.33511	1.09e-05	3.74e-05	>LE01Gene04347	.	PF00657.21^Lipase_GDSL^GDSL-like Lipase/Acylhydrolase^86-332^E:2.4e-05	.	.	.	GO:0016788^molecular_function^hydrolase activity, acting on ester bonds
>LE01Gene07014	8.77743	8.29103	10.6681	12.4162	11.9752	11.2845	2.33451	3.21e-06	1.22e-05	>LE01Gene07014	ADHC1_MYCS2^ADHC1_MYCS2^Q:490-1518,H:4-347^61.1%ID^E:2.4e-119^RecName: Full=NADP-dependent alcohol dehydrogenase C 1	PF08240.11^ADH_N^Alcohol dehydrogenase GroES-like domain^29-144^E:1.9e-30`PF00107.25^ADH_zinc_N^Zinc-binding dehydrogenase^186-306^E:3.9e-20`PF13602.5^ADH_zinc_N_2^Zinc-binding dehydrogenase^218-336^E:2.5e-06	COG1064^alcohol dehydrogenase	KEGG:msb:LJ00_05150`KEGG:msb:LJ00_11525`KEGG:msg:MSMEI_1007`KEGG:msm:MSMEG_1037`KEGG:msm:MSMEG_2317`KO:K13979	GO:0008106^molecular_function^alcohol dehydrogenase (NADP+) activity`GO:0008270^molecular_function^zinc ion binding	GO:0055114^biological_process^oxidation-reduction process
>LE01Gene01531	10.3949	10.0964	9.96531	13.0312	12.6143	11.3965	2.33407	2.07e-07	9.53e-07	>LE01Gene01531	YEY8_SCHPO^YEY8_SCHPO^Q:608-1144,H:73-234^31.2%ID^E:1.4e-10^RecName: Full=Uncharacterized nucleolar protein C2C4.08	.	.	KEGG:sce:YCL036W	GO:0003676^molecular_function^nucleic acid binding	.
>LE01Gene01406	7.92887	7.30445	8.69554	10.1246	10.8433	10.163	2.33321	9.66e-13	1.05e-11	>LE01Gene01406	LAMB_EMENI^LAMB_EMENI^Q:218-769,H:1-180^48.4%ID^E:4.3e-45^RecName: Full=Lactam utilization protein lamB	PF03746.15^LamB_YcsF^LamB/YcsF family^16-203^E:7.3e-69	.	KEGG:ani:AN0886.2`KO:K07160	GO:0003824^molecular_function^catalytic activity`GO:0005975^biological_process^carbohydrate metabolic process`GO:0006807^biological_process^nitrogen compound metabolic process	.
>LE01Gene09636	8.61547	8.68478	8.48422	11.0704	10.9731	10.7076	2.3308	1.19e-13	1.51e-12	>LE01Gene09636	GUS79_ASPNC^GUS79_ASPNC^Q:1289-1939,H:317-540^30.6%ID^E:8e-17^RecName: Full=Beta-glucuronidase {ECO:0000303|PubMed:18377882}	.	.	.	.	.
>LE01Gene13069	9.24955	9.0604	9.72337	11.7524	11.6512	11.6951	2.33001	9.47e-19	2.56e-17	>LE01Gene13069	YFCG_ECOLI^YFCG_ECOLI^Q:485-1153,H:2-213^41.9%ID^E:5.9e-37^RecName: Full=Disulfide-bond oxidoreductase YfcG	.	.	.	.	.
>LE01Gene08074	8.64726	8.08118	8.33897	10.9917	11.135	9.46451	2.32952	1.37e-08	7.65e-08	>LE01Gene08074	LIZ1_SCHPO^LIZ1_SCHPO^Q:113-1537,H:19-495^31.6%ID^E:4.3e-63^RecName: Full=Pantothenate transporter liz1	PF07690.15^MFS_1^Major Facilitator Superfamily^56-414^E:1.4e-30	.	KEGG:sce:YCR028C`KO:K03448	GO:0016021^cellular_component^integral component of membrane`GO:0005886^cellular_component^plasma membrane`GO:0015233^molecular_function^pantothenate transmembrane transporter activity`GO:0006897^biological_process^endocytosis`GO:0015887^biological_process^pantothenate transmembrane transport	GO:0055085^biological_process^transmembrane transport`GO:0016021^cellular_component^integral component of membrane
>LE01Gene05800	7.69882	7.28675	7.74723	9.86716	9.96761	9.90466	2.32816	4.19e-21	1.54e-19	>LE01Gene05800	YJV3_YEAST^YJV3_YEAST^Q:542-1510,H:10-330^48.9%ID^E:1.3e-73^RecName: Full=Uncharacterized protein YJL213W	PF01979.19^Amidohydro_1^Amidohydrolase family^97-451^E:1e-39`PF07969.10^Amidohydro_3^Amidohydrolase family^344-455^E:7.8e-10	.	KEGG:sce:YJL213W	GO:0016810^molecular_function^hydrolase activity, acting on carbon-nitrogen (but not peptide) bonds`GO:1901575^biological_process^organic substance catabolic process	GO:0016787^molecular_function^hydrolase activity
>LE01Gene00737	8.60112	8.61558	8.97256	11.1051	11.3301	10.6878	2.32764	1.17e-18	3.14e-17	>LE01Gene00737	PNAA_PRUDU^PNAA_PRUDU^Q:146-1369,H:14-425^29.3%ID^E:9.8e-41^RecName: Full=Peptide-N4-(N-acetyl-beta-glucosaminyl)asparagine amidase A	.	.	.	.	.
>LE01Gene02497	9.24724	8.67461	9.36129	11.4698	11.6512	11.1869	2.32653	3.22e-17	6.81e-16	>LE01Gene02497	H1_EMENI^H1_EMENI^Q:491-775,H:4-94^45.4%ID^E:1.6e-08^RecName: Full=Histone H1	PF00538.18^Linker_histone^linker histone H1 and H5 family^99-172^E:8e-23	.	.	.	GO:0003677^molecular_function^DNA binding`GO:0006334^biological_process^nucleosome assembly`GO:0000786^cellular_component^nucleosome`GO:0005634^cellular_component^nucleus
>LE01Gene10308	9.89089	9.7652	10.3811	12.4356	12.5678	12.0315	2.32598	4.14e-14	5.71e-13	>LE01Gene10308	.	.	.	.	.	.
>LE01Gene11896	5.57275	5.23336	5.89501	7.7994	8.26379	7.51407	2.32574	5.89e-09	3.48e-08	>LE01Gene11896	.	.	.	.	.	.
>LE01Gene00645	8.57565	8.37299	8.80371	9.81416	11.7476	10.5123	2.32489	4.27e-05	0.000131598	>LE01Gene00645	NTAQ1_HUMAN^NTAQ1_HUMAN^Q:10-618,H:12-203^38.8%ID^E:1e-28^RecName: Full=Protein N-terminal glutamine amidohydrolase	PF09764.8^Nt_Gln_amidase^N-terminal glutamine amidase^14-203^E:3.3e-57	.	.	.	.
>LE01Gene13242	6.79043	5.78041	7.27929	8.89304	9.43866	8.73311	2.32482	1.35e-11	1.21e-10	>LE01Gene13242	YAOI_SCHPO^YAOI_SCHPO^Q:287-1768,H:34-498^32.9%ID^E:4.9e-61^RecName: Full=Uncharacterized transporter C11D3.18C	.	.	.	.	.
>LE01Gene00945	9.47291	9.72634	9.38107	11.7272	12.1128	11.6928	2.32443	1.36e-14	2.02e-13	>LE01Gene00945	.	.	.	.	.	.
>LE01Gene12552	8.24731	8.6712	8.29331	10.7347	10.9158	10.5365	2.32383	2.19e-24	1.28e-22	>LE01Gene12552	.	.	.	.	.	.
>LE01Gene13025	5.00287	4.27121	4.09931	6.83571	7.31738	5.82725	2.32161	2.73e-07	1.23e-06	>LE01Gene13025	.	.	.	.	.	.
>LE01Gene11247	9.08652	9.80771	9.3745	11.987	11.8418	11.4363	2.32125	1.62e-08	8.92e-08	>LE01Gene11247	PARP4_HUMAN^PARP4_HUMAN^Q:1558-1842,H:465-564^31%ID^E:0.00055^RecName: Full=Poly [ADP-ribose] polymerase 4	.	.	.	.	.
>LE01Gene08864	8.02341	7.47824	7.9609	9.6373	10.7403	9.83458	2.31935	0.00168882	0.00380937	>LE01Gene08864	.	.	.	.	.	.
>LE01Gene13914	8.60112	9.22277	9.06512	11.5189	11.3791	10.9513	2.3188	4.74e-27	4.01e-25	>LE01Gene13914	ANM3_SCHPO^ANM3_SCHPO^Q:104-1702,H:45-531^34%ID^E:9.3e-77^RecName: Full=Ribosomal protein arginine N-methyltransferase rmt3	PF06325.12^PrmA^Ribosomal protein L11 methyltransferase (PrmA)^231-306^E:1.2e-10`PF13847.5^Methyltransf_31^Methyltransferase domain^233-341^E:1.2e-06`PF05175.13^MTS^Methyltransferase small domain^233-305^E:3e-05`PF13649.5^Methyltransf_25^Methyltransferase domain^235-330^E:1.1e-09`PF08241.11^Methyltransf_11^Methyltransferase domain^236-335^E:5.5e-08`PF14226.5^DIOX_N^non-haem dioxygenase in morphin…	.	KEGG:spo:SPBC8D2.10c`KO:K11436	GO:0005737^cellular_component^cytoplasm`GO:0005829^cellular_component^cytosol`GO:0005840^cellular_component^ribosome`GO:0008469^molecular_function^histone-arginine N-methyltransferase activity`GO:0046872^molecular_function^metal ion binding`GO:0008168^molecular_function^methyltransferase activity`GO:0003676^molecular_function^nucleic acid binding`GO:0016274^molecular_function^protein-arginine N-m…	GO:0008168^molecular_function^methyltransferase activity`GO:0016491^molecular_function^oxidoreductase activity`GO:0055114^biological_process^oxidation-reduction process
>LE01Gene13230	9.03405	8.98009	9.15211	11.2634	11.6018	11.2191	2.31682	4.74e-13	5.4e-12	>LE01Gene13230	SACS_HUMAN^SACS_HUMAN^Q:317-4744,H:100-1669^23.1%ID^E:8.8e-62^RecName: Full=Sacsin	.	.	.	.	.
>LE01Gene04781	4.41856	6.70195	5.36983	8.35153	7.97885	7.91071	2.3165	8.09e-07	3.38e-06	>LE01Gene04781	.	.	.	.	.	.
>LE01Gene00017	7.43313	8.26866	7.83907	10.1769	10.3495	10.0439	2.31324	5.39e-12	5.13e-11	>LE01Gene00017	CAF5_SCHPO^CAF5_SCHPO^Q:524-1966,H:48-531^41.7%ID^E:2.7e-109^RecName: Full=Caffeine resistance protein 5	.	.	.	.	.
>LE01Gene04356	7.3668	7.46256	8.48422	10.8372	9.85619	9.45817	2.31147	2.38e-06	9.25e-06	>LE01Gene04356	DLTE_BACSU^DLTE_BACSU^Q:232-978,H:8-247^32.1%ID^E:1.1e-22^RecName: Full=Uncharacterized oxidoreductase DltE	.	.	.	.	.
>LE01Gene11113	4.91275	5.67551	5.84525	7.28846	7.65835	8.31336	2.31096	6.08e-07	2.59e-06	>LE01Gene11113	.	.	.	.	.	.
>LE01Gene05677	8.99341	9.09641	9.45135	11.8257	11.3713	11.2396	2.30942	5.12e-17	1.06e-15	>LE01Gene05677	AARE_ARATH^AARE_ARATH^Q:209-2134,H:95-742^31.3%ID^E:9e-71^RecName: Full=Acylamino-acid-releasing enzyme {ECO:0000305}	PF00326.20^Peptidase_S9^Prolyl oligopeptidase family^499-600^E:2.1e-14`PF00326.20^Peptidase_S9^Prolyl oligopeptidase family^647-712^E:1.6e-08`PF00135.27^COesterase^Carboxylesterase family^787-901^E:3.1e-10`PF07859.12^Abhydrolase_3^alpha/beta hydrolase fold^818-1057^E:1.7e-37	COG1506^peptidase s9 prolyl oligopeptidase active site domain protein	KEGG:ssc:396961`KO:K01303	GO:0005737^cellular_component^cytoplasm`GO:0004252^molecular_function^serine-type endopeptidase activity	GO:0008236^molecular_function^serine-type peptidase activity`GO:0006508^biological_process^proteolysis`GO:0016787^molecular_function^hydrolase activity
>LE01Gene04702	10.7221	10.1451	9.94921	13.0011	13.0737	10.9987	2.30883	2.41e-07	1.1e-06	>LE01Gene04702	.	.	.	.	.	.
>LE01Gene02405	9.42686	10.1886	9.89062	12.265	12.6445	11.3094	2.30664	2.79e-13	3.31e-12	>LE01Gene02405	SORT_PENRW^SORT_PENRW^Q:1907-3355,H:17-497^43.9%ID^E:2.2e-99^RecName: Full=Major facilitator-type transporter sorT {ECO:0000303|PubMed:29104566}	.	.	.	.	.
>LE01Gene11333	6.58695	5.70246	6.36998	8.51913	8.67538	8.46866	2.30624	5.37e-10	3.76e-09	>LE01Gene11333	.	.	.	.	.	.
>LE01Gene02686	8.15697	7.61217	8.45963	10.7998	10.2188	10.1434	2.30543	1.48e-13	1.85e-12	>LE01Gene02686	YER5_SCHPO^YER5_SCHPO^Q:81-800,H:4-270^38.1%ID^E:4.7e-49^RecName: Full=Uncharacterized oxidoreductase C2F3.05c	PF00248.20^Aldo_ket_red^Aldo/keto reductase family^22-203^E:1e-29	.	KEGG:spo:SPAC2F3.05c	GO:0005829^cellular_component^cytosol`GO:0005634^cellular_component^nucleus`GO:0032866^molecular_function^D-xylose:NADP reductase activity`GO:0032867^molecular_function^L-arabinose:NADP reductase activity`GO:0019568^biological_process^arabinose catabolic process`GO:0042843^biological_process^D-xylose catabolic process	.
>LE01Gene04212	6.81551	7.17574	7.49633	9.17345	9.64778	9.58969	2.30447	3.81e-18	9.45e-17	>LE01Gene04212	.	.	.	.	.	.
>LE01Gene05986	8.41261	8.67801	8.42193	11.2097	11.1614	9.49993	2.3029	3.99e-06	1.48e-05	>LE01Gene05986	.	.	.	.	.	.
>LE01Gene07266	10.9114	10.4445	11.0542	13.09	13.1116	13.1808	2.30266	7.24e-17	1.48e-15	>LE01Gene07266	.	PF13417.5^GST_N_3^Glutathione S-transferase, N-terminal domain^18-93^E:3.6e-06	.	.	.	GO:0005515^molecular_function^protein binding
>LE01Gene00354	9.55526	9.34752	9.80047	11.9713	12.0491	11.5717	2.30068	1.17e-17	2.68e-16	>LE01Gene00354	.	.	.	.	.	.
>LE01Gene04843	6.49678	6.03483	6.72671	8.35977	8.84568	8.93232	2.30014	5.63e-14	7.6e-13	>LE01Gene04843	.	PF13409.5^GST_N_2^Glutathione S-transferase, N-terminal domain^39-116^E:1.7e-08`PF13417.5^GST_N_3^Glutathione S-transferase, N-terminal domain^40-122^E:5.5e-11	.	.	.	GO:0005515^molecular_function^protein binding
>LE01Gene07602	7.84608	7.62631	6.42182	9.27718	9.51306	10.1875	2.29965	1.1e-09	7.29e-09	>LE01Gene07602	.	.	.	.	.	.
>LE01Gene13665	3.54574	3.7578	3.91864	5.60651	6.03895	6.17535	2.2994	1.27e-05	4.31e-05	>LE01Gene13665	.	.	.	.	.	.
>LE01Gene03411	7.88215	8.13162	7.85173	9.87724	10.6556	10.1195	2.29879	9.79e-14	1.27e-12	>LE01Gene03411	COX1_COPC7^COX1_COPC7^Q:327-1787,H:1-509^34.6%ID^E:4.5e-81^RecName: Full=Cytochrome P450 monooxygenase COX1 {ECO:0000303|PubMed:19400802}	PF00067.21^p450^Cytochrome P450^54-476^E:2.1e-58	COG2124^Cytochrome p450	KEGG:cci:CC1G_03564	GO:0016021^cellular_component^integral component of membrane`GO:0020037^molecular_function^heme binding`GO:0005506^molecular_function^iron ion binding`GO:0004497^molecular_function^monooxygenase activity`GO:0016705^molecular_function^oxidoreductase activity, acting on paired donors, with incorporation or reduction of molecular oxygen	GO:0005506^molecular_function^iron ion binding`GO:0016705^molecular_function^oxidoreductase activity, acting on paired donors, with incorporation or reduction of molecular oxygen`GO:0020037^molecular_function^heme binding`GO:0055114^biological_process^oxidation-reduction process
>LE01Gene11018	6.10751	7.11687	7.04591	9.15936	8.8243	9.31109	2.2987	7.63e-19	2.1e-17	>LE01Gene11018	DPOD_YEAST^DPOD_YEAST^Q:330-1247,H:266-554^35.1%ID^E:1.4e-45^RecName: Full=DNA polymerase delta catalytic subunit	PF03104.18^DNA_pol_B_exo1^DNA polymerase family B, exonuclease domain^110-313^E:3.8e-37	.	KEGG:sce:YDL102W`KO:K02327	GO:0005829^cellular_component^cytosol`GO:0043625^cellular_component^delta DNA polymerase complex`GO:0005657^cellular_component^replication fork`GO:0008296^molecular_function^3'-5'-exodeoxyribonuclease activity`GO:0051539^molecular_function^4 iron, 4 sulfur cluster binding`GO:0003677^molecular_function^DNA binding`GO:0003887^molecular_function^DNA-directed DNA polymerase activity`GO:0046872^molecu…	.
>LE01Gene01422	8.05007	7.9524	8.79391	10.6381	10.5006	10.6797	2.29541	1.14e-17	2.6e-16	>LE01Gene01422	NADC_YEAST^NADC_YEAST^Q:43-891,H:5-293^56%ID^E:2.4e-82^RecName: Full=Nicotinate-nucleotide pyrophosphorylase [carboxylating]	PF02749.15^QRPTase_N^Quinolinate phosphoribosyl transferase, N-terminal domain^36-121^E:3.4e-20`PF01729.18^QRPTase_C^Quinolinate phosphoribosyl transferase, C-terminal domain^123-296^E:5.8e-48	.	KEGG:sce:YFR047C`KO:K00767	GO:0005737^cellular_component^cytoplasm`GO:0005634^cellular_component^nucleus`GO:0004514^molecular_function^nicotinate-nucleotide diphosphorylase (carboxylating) activity`GO:0034354^biological_process^'de novo' NAD biosynthetic process from tryptophan`GO:0034213^biological_process^quinolinate catabolic process	GO:0016763^molecular_function^transferase activity, transferring pentosyl groups`GO:0004514^molecular_function^nicotinate-nucleotide diphosphorylase (carboxylating) activity`GO:0009435^biological_process^NAD biosynthetic process
>LE01Gene12379	7.80283	8.0657	8.12106	10.4967	10.1529	10.2015	2.2937	5.43e-41	2.27e-38	>LE01Gene12379	PDP1_BOVIN^PDP1_BOVIN^Q:430-1233,H:142-420^30.7%ID^E:3e-17^RecName: Full=[Pyruvate dehydrogenase [acetyl-transferring]]-phosphatase 1, mitochondrial	PF00481.20^PP2C^Protein phosphatase 2C^257-415^E:7.6e-21	.	.	.	GO:0003824^molecular_function^catalytic activity
>LE01Gene09626	8.45313	8.77323	8.82312	11.3626	10.8464	10.641	2.29345	4.05e-11	3.37e-10	>LE01Gene09626	.	PF12937.6^F-box-like^F-box-like^117-176^E:1.7e-07	.	.	.	GO:0005515^molecular_function^protein binding
>LE01Gene12959	11.3506	10.5668	11.0266	13.666	13.3362	12.7926	2.29268	4.91e-13	5.58e-12	>LE01Gene12959	PRTA_ASPNG^PRTA_ASPNG^Q:475-1263,H:1-281^46%ID^E:1.9e-49^RecName: Full=Aspergillopepsin-2	.	.	.	.	.
>LE01Gene10880	10.4207	10.1646	10.1762	12.388	12.9536	12.1955	2.29157	3.96e-12	3.86e-11	>LE01Gene10880	GPA4_USTMA^GPA4_USTMA^Q:115-1461,H:26-579^27.2%ID^E:1.3e-38^RecName: Full=Guanine nucleotide-binding protein alpha-4 subunit	PF00503.19^G-alpha^G-protein alpha subunit^67-474^E:3.8e-94	.	.	GO:0031683^molecular_function^G-protein beta/gamma-subunit complex binding`GO:0005525^molecular_function^GTP binding`GO:0003924^molecular_function^GTPase activity`GO:0046872^molecular_function^metal ion binding`GO:0007188^biological_process^adenylate cyclase-modulating G protein-coupled receptor signaling pathway	GO:0003924^molecular_function^GTPase activity`GO:0019001^molecular_function^guanyl nucleotide binding`GO:0031683^molecular_function^G-protein beta/gamma-subunit complex binding`GO:0007186^biological_process^G protein-coupled receptor signaling pathway
>LE01Gene14345	6.48119	6.71525	6.95499	8.07943	9.36022	9.27547	2.29147	2.27e-08	1.22e-07	>LE01Gene14345	.	.	.	.	.	.
>LE01Gene04749	5.81588	4.85527	4.81949	7.45159	7.75188	7.25587	2.28912	2.98e-11	2.53e-10	>LE01Gene04749	.	.	.	.	.	.
>LE01Gene12909	9.41254	9.67795	9.99699	11.9165	12.1708	11.8953	2.28559	3.28e-24	1.86e-22	>LE01Gene12909	XDH_HYPJR^XDH_HYPJR^Q:336-1175,H:78-372^34.5%ID^E:7.4e-40^RecName: Full=D-xylose 1-dehydrogenase (NADP(+)) {ECO:0000305|PubMed:18031347}	.	COG0673^oxidoreductase	KEGG:dre:449558`KO:K00078	GO:0047837^molecular_function^D-xylose 1-dehydrogenase (NADP+) activity`GO:0047115^molecular_function^trans-1,2-dihydrobenzene-1,2-diol dehydrogenase activity`GO:0042843^biological_process^D-xylose catabolic process	.
>LE01Gene03247	7.48877	6.74147	8.084	10.171	9.50924	9.68872	2.28512	4.91e-09	2.95e-08	>LE01Gene03247	YNK8_YEAST^YNK8_YEAST^Q:26-718,H:3-244^38.5%ID^E:5.4e-42^RecName: Full=Uncharacterized protein YNL108C	PF00300.21^His_Phos_1^Histidine phosphatase superfamily (branch 1)^12-190^E:7.7e-23	.	KEGG:sce:YNL108C`KO:K15206	GO:0016791^molecular_function^phosphatase activity`GO:0016311^biological_process^dephosphorylation	.
>LE01Gene11473	10.6252	11.018	10.7824	12.0612	13.9685	12.5373	2.27796	3.76e-06	1.41e-05	>LE01Gene11473	.	.	.	.	.	.
>LE01Gene05143	9.32135	9.0578	9.51041	11.6291	11.4406	11.6688	2.27648	4.83e-23	2.27e-21	>LE01Gene05143	WDR1_DROME^WDR1_DROME^Q:177-1988,H:8-605^36.2%ID^E:1.1e-117^RecName: Full=Actin-interacting protein 1	PF00400.31^WD40^WD domain, G-beta repeat^50-84^E:0.0056`PF00400.31^WD40^WD domain, G-beta repeat^181-215^E:0.16`PF12894.6^ANAPC4_WD40^Anaphase-promoting complex subunit 4 WD40 domain^194-274^E:5.7e-05`PF00400.31^WD40^WD domain, G-beta repeat^230-259^E:2.2e-05`PF12894.6^ANAPC4_WD40^Anaphase-promoting complex subunit 4 WD40 domain^453-539^E:7e-08`PF00400.31^WD40^WD domain, G-beta repeat^481-514^E:0…	ENOG410XQN1^actin filament depolymerization	KEGG:dme:Dmel_CG10724	GO:0042643^cellular_component^actomyosin, actin portion`GO:0030864^cellular_component^cortical actin cytoskeleton`GO:0005856^cellular_component^cytoskeleton`GO:0003779^molecular_function^actin binding`GO:0051015^molecular_function^actin filament binding`GO:0030042^biological_process^actin filament depolymerization`GO:0007298^biological_process^border follicle cell migration`GO:0001736^biological_…	GO:0005515^molecular_function^protein binding
>LE01Gene03133	10.1095	10.1898	11.3221	12.6433	12.9759	13.1267	2.27619	9.87e-10	6.59e-09	>LE01Gene03133	YFZ4_SCHPO^YFZ4_SCHPO^Q:633-2012,H:46-505^52.2%ID^E:3.1e-133^RecName: Full=Uncharacterized transporter C1039.04	PF07690.15^MFS_1^Major Facilitator Superfamily^65-431^E:1.7e-29	.	KEGG:spo:SPAC1039.04	GO:0005783^cellular_component^endoplasmic reticulum`GO:0016021^cellular_component^integral component of membrane`GO:0005886^cellular_component^plasma membrane`GO:0046943^molecular_function^carboxylic acid transmembrane transporter activity`GO:1905039^biological_process^carboxylic acid transmembrane transport	GO:0055085^biological_process^transmembrane transport`GO:0016021^cellular_component^integral component of membrane
>LE01Gene07846	6.93478	6.93568	7.14177	9.25746	9.24775	9.30168	2.27087	2.53e-14	3.62e-13	>LE01Gene07846	FAD12_MORAP^FAD12_MORAP^Q:320-1426,H:37-399^37.7%ID^E:7.9e-70^RecName: Full=Delta(12) fatty acid desaturase	PF00487.23^FA_desaturase^Fatty acid desaturase^95-367^E:1e-20	.	.	GO:0016021^cellular_component^integral component of membrane`GO:0102985^molecular_function^Delta12-fatty-acid desaturase activity`GO:0016491^molecular_function^oxidoreductase activity`GO:0006633^biological_process^fatty acid biosynthetic process`GO:0006636^biological_process^unsaturated fatty acid biosynthetic process	GO:0006629^biological_process^lipid metabolic process
>LE01Gene11691	4.48261	4.90251	5.09967	6.763	7.52844	6.81449	2.27037	1.33e-08	7.47e-08	>LE01Gene11691	.	.	.	.	.	.
>LE01Gene08330	7.04494	7.0865	6.47187	9.42982	9.45465	8.31336	2.2702	9.19e-12	8.44e-11	>LE01Gene08330	LAC1_PHLRA^LAC1_PHLRA^Q:13-1587,H:8-515^65.9%ID^E:3.2e-199^RecName: Full=Laccase	.	.	.	.	.
>LE01Gene03200	9.58839	9.23205	9.97402	12.139	11.7427	11.7776	2.26956	3.01e-15	5e-14	>LE01Gene03200	.	PF13468.5^Glyoxalase_3^Glyoxalase-like domain^19-211^E:8.3e-29	.	.	.	.
>LE01Gene08491	6.73891	6.68854	7.12101	9.31158	9.13075	8.88267	2.26659	2.98e-11	2.53e-10	>LE01Gene08491	.	.	.	.	.	.
>LE01Gene00476	10.1605	10.134	10.4357	12.5523	12.6208	12.3607	2.26645	1.31e-23	6.75e-22	>LE01Gene00476	ESTD_PIG^ESTD_PIG^Q:47-907,H:3-282^49.1%ID^E:1.3e-69^RecName: Full=S-formylglutathione hydrolase	PF00756.19^Esterase^Putative esterase^33-284^E:2.4e-41	COG0627^esterase	KEGG:ssc:397127`KO:K01070	GO:0031410^cellular_component^cytoplasmic vesicle`GO:0052689^molecular_function^carboxylic ester hydrolase activity`GO:0042802^molecular_function^identical protein binding`GO:0018738^molecular_function^S-formylglutathione hydrolase activity`GO:0046294^biological_process^formaldehyde catabolic process	.
>LE01Gene07675	3.76761	5.50231	5.74026	7.63934	7.26395	7.45585	2.26543	1.59e-05	5.3e-05	>LE01Gene07675	A1345_ARTBC^A1345_ARTBC^Q:223-1386,H:116-500^28.7%ID^E:1.3e-42^RecName: Full=Probable extracellular serine carboxypeptidase {ECO:0000305}	PF05577.11^Peptidase_S28^Serine carboxypeptidase S28^76-222^E:4e-28`PF05577.11^Peptidase_S28^Serine carboxypeptidase S28^342-463^E:1.7e-07	ENOG410XSGG^protease, serine, 16 (thymus)	KEGG:abe:ARB_01345	GO:0005576^cellular_component^extracellular region`GO:0016021^cellular_component^integral component of membrane`GO:0004180^molecular_function^carboxypeptidase activity`GO:0008236^molecular_function^serine-type peptidase activity	GO:0008236^molecular_function^serine-type peptidase activity`GO:0006508^biological_process^proteolysis
>LE01Gene02776	3.95987	3.41093	2.00945	5.66089	5.70657	4.95208	2.262	0.00411538	0.00851255	>LE01Gene02776	.	.	.	.	.	.
>LE01Gene02701	7.02357	6.60531	7.30712	9.74662	8.86075	8.99792	2.25903	8.78e-05	0.000254416	>LE01Gene02701	LIP1_GEOFE^LIP1_GEOFE^Q:1045-2355,H:43-514^30.3%ID^E:3.3e-42^RecName: Full=Lipase 1	PF00135.27^COesterase^Carboxylesterase family^39-528^E:1e-81`PF07859.12^Abhydrolase_3^alpha/beta hydrolase fold^141-237^E:1.8e-08	COG2272^Carboxylesterase	KEGG:mmu:11423`KO:K01049	GO:0031225^cellular_component^anchored component of membrane`GO:0030424^cellular_component^axon`GO:0030054^cellular_component^cell junction`GO:0009986^cellular_component^cell surface`GO:0005737^cellular_component^cytoplasm`GO:0030425^cellular_component^dendrite`GO:0005788^cellular_component^endoplasmic reticulum lumen`GO:0005576^cellular_component^extracellular region`GO:0005615^cellular_componen…	GO:0016787^molecular_function^hydrolase activity
>LE01Gene01674	12.5086	12.0015	12.9852	14.5738	14.8098	15.0145	2.25712	5.86e-14	7.87e-13	>LE01Gene01674	AATR1_SCHPO^AATR1_SCHPO^Q:759-2324,H:7-473^35.1%ID^E:6.7e-87^RecName: Full=Aromatic amino acid aminotransferase C56E4.03	PF00155.20^Aminotran_1_2^Aminotransferase class I and II^105-522^E:9.8e-19	.	KEGG:spo:SPAC56E4.03`KO:K00838	GO:0005829^cellular_component^cytosol`GO:0005634^cellular_component^nucleus`GO:0080130^molecular_function^L-phenylalanine:2-oxoglutarate aminotransferase activity`GO:0030170^molecular_function^pyridoxal phosphate binding`GO:0009072^biological_process^aromatic amino acid family metabolic process`GO:0009058^biological_process^biosynthetic process	GO:0030170^molecular_function^pyridoxal phosphate binding`GO:0009058^biological_process^biosynthetic process
>LE01Gene11929	4.60275	4.27121	5.05659	7.42827	6.67915	6.31291	2.25221	6.42e-08	3.19e-07	>LE01Gene11929	.	.	.	.	.	.
>LE01Gene07835	10.6594	12.2761	12.3635	14.3713	14.5905	13.3607	2.25105	9.54e-06	3.3e-05	>LE01Gene07835	.	.	.	.	.	.
>LE01Gene11698	7.14728	7.29562	7.91942	9.97035	9.84259	9.31578	2.24873	6.65e-12	6.25e-11	>LE01Gene11698	.	.	.	.	.	.
>LE01Gene11490	10.852	11.2145	11.6524	13.3758	13.6227	13.5428	2.24111	4.36e-18	1.07e-16	>LE01Gene11490	.	.	.	.	.	.
>LE01Gene05930	5.44997	5.92471	4.96637	7.512	7.78386	7.83442	2.24021	9.29e-14	1.21e-12	>LE01Gene05930	.	.	.	.	.	.
>LE01Gene06515	9.27011	9.27532	9.57671	11.6321	12.1868	10.6184	2.23524	2.89e-10	2.1e-09	>LE01Gene06515	YAO6_SCHPO^YAO6_SCHPO^Q:280-1542,H:32-443^49.6%ID^E:9e-101^RecName: Full=Uncharacterized transporter C11D3.06	PF01554.17^MatE^MatE^96-238^E:1.3e-23`PF01554.17^MatE^MatE^306-465^E:1.5e-22	.	KEGG:spo:SPAC11D3.06`KO:K03327	GO:0000329^cellular_component^fungal-type vacuole membrane`GO:0005794^cellular_component^Golgi apparatus`GO:0016021^cellular_component^integral component of membrane`GO:0015297^molecular_function^antiporter activity`GO:0015238^molecular_function^drug transmembrane transporter activity`GO:0006855^biological_process^drug transmembrane transport`GO:0055085^biological_process^transmembrane transport	GO:0015238^molecular_function^drug transmembrane transporter activity`GO:0015297^molecular_function^antiporter activity`GO:0006855^biological_process^drug transmembrane transport`GO:0055085^biological_process^transmembrane transport`GO:0016020^cellular_component^membrane
>LE01Gene08444	9.48664	9.4993	8.61988	11.0773	11.8719	11.407	2.23461	2.34e-14	3.35e-13	>LE01Gene08444	.	.	.	.	.	.
>LE01Gene04302	8.27017	8.05005	8.06782	9.53729	10.7678	10.5174	2.23451	4.32e-15	7e-14	>LE01Gene04302	CFMB_ASPFU^CFMB_ASPFU^Q:135-362,H:12-87^39%ID^E:0.00032^RecName: Full=GPI-anchored CFEM domain protein B {ECO:0000305}	PF05730.10^CFEM^CFEM domain^28-91^E:5.9e-14	.	.	.	.
>LE01Gene07855	7.17661	7.87752	7.28862	9.07426	10.489	9.06344	2.23386	1.1e-07	5.31e-07	>LE01Gene07855	.	.	.	.	.	.
>LE01Gene11378	10.4166	10.9592	11.2116	12.8381	13.3425	13.171	2.23353	6.58e-15	1.03e-13	>LE01Gene11378	VIPI_SCHPO^VIPI_SCHPO^Q:185-805,H:25-220^27.9%ID^E:5.5e-11^RecName: Full=Protein vip1	.	.	KEGG:spo:SPAC10F6.06	GO:0005829^cellular_component^cytosol`GO:0003723^molecular_function^RNA binding	.
>LE01Gene04826	2.77071	1.96011	3.33326	4.49325	5.62416	3.85079	2.23295	0.0010926	0.00256241	>LE01Gene04826	.	.	.	.	.	.
>LE01Gene00465	8.5003	8.48974	8.43881	10.1498	11.2494	10.4855	2.2306	5.75e-13	6.47e-12	>LE01Gene00465	MOXY_DOTSE^MOXY_DOTSE^Q:274-1914,H:57-576^35.3%ID^E:2.9e-99^RecName: Full=FAD-binding monooxygenase moxY {ECO:0000305}	PF00743.18^FMO-like^Flavin-binding monooxygenase-like^31-243^E:1.2e-07`PF13450.5^NAD_binding_8^NAD(P)-binding Rossmann-like domain^35-87^E:9.2e-06	.	.	GO:0050660^molecular_function^flavin adenine dinucleotide binding`GO:0004499^molecular_function^N,N-dimethylaniline monooxygenase activity`GO:0050661^molecular_function^NADP binding	GO:0004499^molecular_function^N,N-dimethylaniline monooxygenase activity`GO:0050660^molecular_function^flavin adenine dinucleotide binding`GO:0050661^molecular_function^NADP binding`GO:0055114^biological_process^oxidation-reduction process
>LE01Gene09854	8.95442	8.94102	8.76074	11.264	10.9173	11.1454	2.23022	2.56e-21	9.7e-20	>LE01Gene09854	P20D2_XENTR^P20D2_XENTR^Q:219-1439,H:28-415^37.9%ID^E:5.1e-66^RecName: Full=Peptidase M20 domain-containing protein 2	PF01546.27^Peptidase_M20^Peptidase family M20/M25/M40^107-298^E:5.7e-08`PF07687.13^M20_dimer^Peptidase dimerisation domain^201-286^E:6.5e-09	COG1473^amidohydrolase	KEGG:xtr:613074	GO:0016787^molecular_function^hydrolase activity`GO:0008152^biological_process^metabolic process	GO:0016787^molecular_function^hydrolase activity
>LE01Gene12647	10.6437	10.072	11.1322	12.4346	12.9684	13.2171	2.22999	1.79e-07	8.33e-07	>LE01Gene12647	DUR3_ORYSJ^DUR3_ORYSJ^Q:44-1981,H:49-659^41.2%ID^E:4.9e-126^RecName: Full=Urea-proton symporter DUR3	.	.	.	.	.
>LE01Gene07547	5.8886	6.05588	5.84525	7.84121	8.78375	7.47272	2.22838	1.7e-06	6.76e-06	>LE01Gene07547	.	.	.	.	.	.
>LE01Gene01629	8.88206	9.05519	8.886	11.0367	11.1163	11.331	2.2256	1.1e-16	2.2e-15	>LE01Gene01629	JMJD7_MOUSE^JMJD7_MOUSE^Q:69-923,H:12-282^33.7%ID^E:5.4e-33^RecName: Full=JmjC domain-containing protein 7	PF13621.5^Cupin_8^Cupin-like domain^49-320^E:4.6e-54	ENOG410YDQ9^Jumonji domain containing 7	KEGG:ddi:DDB_G0292770`KO:K19219	.	.
>LE01Gene03291	8.64025	8.48587	8.71299	11.1124	10.699	10.6577	2.22508	6.53e-23	3.02e-21	>LE01Gene03291	RPN14_YEAST^RPN14_YEAST^Q:594-1253,H:118-319^27.5%ID^E:1.5e-10^RecName: Full=26S proteasome regulatory subunit RPN14	.	.	.	.	.
>LE01Gene01366	9.3581	9.39991	9.31406	11.5262	11.625	11.582	2.22221	1.28e-26	1.03e-24	>LE01Gene01366	YM94_YEAST^YM94_YEAST^Q:74-1186,H:6-348^27.8%ID^E:6e-21^RecName: Full=Uncharacterized protein YMR315W	PF01408.21^GFO_IDH_MocA^Oxidoreductase family, NAD-binding Rossmann fold^25-147^E:4e-14`PF02894.16^GFO_IDH_MocA_C^Oxidoreductase family, C-terminal alpha/beta domain^175-241^E:0.00024	COG0673^oxidoreductase	KEGG:lxx:Lxx24320`KO:K00010	GO:0050112^molecular_function^inositol 2-dehydrogenase activity`GO:0019310^biological_process^inositol catabolic process	GO:0016491^molecular_function^oxidoreductase activity`GO:0055114^biological_process^oxidation-reduction process
>LE01Gene06989	10.1057	9.46824	9.68676	11.7532	12.8796	10.3017	2.21868	6.09e-06	2.19e-05	>LE01Gene06989	PSID_PSICU^PSID_PSICU^Q:916-2190,H:26-438^32.1%ID^E:7.4e-54^RecName: Full=L-tryptophan decarboxylase {ECO:0000303|PubMed:28763571}	.	.	.	.	.
>LE01Gene04336	7.8582	7.41448	7.59748	9.99437	10.0276	9.4454	2.21699	2.41e-18	6.12e-17	>LE01Gene04336	.	.	.	.	.	.
>LE01Gene03627	0	3.65118	3.91864	5.33273	5.62416	4.99944	2.21049	0.00274923	0.00592356	>LE01Gene03627	.	.	.	.	.	.
>LE01Gene04192	8.50802	8.33043	9.30488	11.3189	10.8962	10.6697	2.21017	2.95e-05	9.36e-05	>LE01Gene04192	GNPI_DROPS^GNPI_DROPS^Q:352-1158,H:1-269^66.2%ID^E:1.3e-99^RecName: Full=Glucosamine-6-phosphate isomerase	PF01182.19^Glucosamine_iso^Glucosamine-6-phosphate isomerases/6-phosphogluconolactonase^40-247^E:5.8e-20	.	KEGG:dpo:Dpse_GA19983`KO:K02564	GO:0005737^cellular_component^cytoplasm`GO:0004342^molecular_function^glucosamine-6-phosphate deaminase activity`GO:0005975^biological_process^carbohydrate metabolic process`GO:0006091^biological_process^generation of precursor metabolites and energy`GO:0006043^biological_process^glucosamine catabolic process`GO:0006044^biological_process^N-acetylglucosamine metabolic process	GO:0005975^biological_process^carbohydrate metabolic process
>LE01Gene05462	10.68	10.3708	10.732	13.0747	12.5664	12.7482	2.20993	2e-17	4.41e-16	>LE01Gene05462	YXBG_BACSU^YXBG_BACSU^Q:149-928,H:2-253^37.2%ID^E:2.5e-38^RecName: Full=Uncharacterized oxidoreductase YxbG	.	.	.	.	.
>LE01Gene09505	8.63322	9.21811	8.9013	11.3935	10.771	11.2003	2.20925	2.56e-13	3.06e-12	>LE01Gene09505	DOHH_LENED^DOHH_LENED^Q:321-1310,H:1-330^96.1%ID^E:9.3e-137^RecName: Full=Deoxyhypusine hydroxylase {ECO:0000255|HAMAP-Rule:MF_03101}	.	.	.	.	.
>LE01Gene01873	9.40843	10.1838	10.3118	12.1312	12.7974	11.4385	2.2085	1.57e-06	6.29e-06	>LE01Gene01873	BLI3_NEUCR^BLI3_NEUCR^Q:130-669,H:30-209^37.6%ID^E:1.2e-28^RecName: Full=Protein bli-3	PF16242.4^Pyrid_ox_like^Pyridoxamine 5'-phosphate oxidase like^5-157^E:1.3e-28`PF01243.19^Putative_PNPOx^Pyridoxamine 5'-phosphate oxidase^9-93^E:3.8e-09	.	.	.	.
>LE01Gene13992	6.82789	7.26883	7.37883	8.31808	10.1094	9.16038	2.20841	3.33e-06	1.26e-05	>LE01Gene13992	LIP2_GEOCN^LIP2_GEOCN^Q:376-1959,H:6-553^32.3%ID^E:8.1e-69^RecName: Full=Lipase 2	.	.	.	.	.
>LE01Gene03017	9.0287	8.98832	9.18748	11.4868	11.3323	10.9581	2.20717	9.55e-16	1.69e-14	>LE01Gene03017	MPI_CRYNJ^MPI_CRYNJ^Q:142-1404,H:4-434^49.3%ID^E:2.5e-105^RecName: Full=Mannose-6-phosphate isomerase	.	.	.	.	.
>LE01Gene06052	7.17661	6.60531	6.03476	8.90436	9.21058	8.39973	2.20657	1.31e-09	8.56e-09	>LE01Gene06052	.	PF13374.5^TPR_10^Tetratricopeptide repeat^29-70^E:1e-08`PF13424.5^TPR_12^Tetratricopeptide repeat^31-90^E:7.4e-11`PF13374.5^TPR_10^Tetratricopeptide repeat^71-111^E:4.2e-07`PF13424.5^TPR_12^Tetratricopeptide repeat^72-137^E:4.2e-12`PF13374.5^TPR_10^Tetratricopeptide repeat^113-154^E:1.5e-06	.	.	.	.
>LE01Gene07201	4.04717	5.67551	5.74026	7.17159	7.65835	7.65382	2.2055	0.000261749	0.000694058	>LE01Gene07201	YHG7_SCHPO^YHG7_SCHPO^Q:484-1116,H:134-353^29%ID^E:4.3e-15^RecName: Full=Putative mannan endo-1,6-alpha-mannosidase C1198.07c	.	.	.	.	.
>LE01Gene08929	9.43295	9.56685	9.22688	11.8739	11.7313	11.1513	2.20378	1.91e-12	1.96e-11	>LE01Gene08929	RDR1_ARATH^RDR1_ARATH^Q:1353-3278,H:363-932^28.3%ID^E:1.5e-59^RecName: Full=RNA-dependent RNA polymerase 1	.	.	.	.	.
>LE01Gene13636	5.00287	4.80642	3.91864	5.26413	7.05964	7.35932	2.20351	3.12e-05	9.85e-05	>LE01Gene13636	.	.	.	.	.	.
>LE01Gene07210	8.01801	8.23214	7.90735	10.5088	10.3269	9.86045	2.2024	9.23e-20	2.88e-18	>LE01Gene07210	.	PF01753.17^zf-MYND^MYND finger^25-65^E:9.7e-08	.	.	.	.
>LE01Gene05507	6.10751	5.94741	5.74026	8.68902	8.33028	6.66097	2.20145	1.19e-06	4.84e-06	>LE01Gene05507	CLM2_GIBZE^CLM2_GIBZE^Q:52-1545,H:12-511^42%ID^E:3.6e-111^RecName: Full=Cytochrome P450 monooxygenase CLM2 {ECO:0000303|PubMed:26673640}	.	.	.	.	.
>LE01Gene03022	8.50417	8.80777	8.73365	10.5143	11.3602	10.6307	2.20114	4.71e-16	8.75e-15	>LE01Gene03022	.	.	.	.	.	.
>LE01Gene14627	9.79325	9.17787	10.4336	12.1109	11.8273	12.2905	2.19839	2.85e-07	1.28e-06	>LE01Gene14627	.	.	.	.	.	.
>LE01Gene12841	11.1624	10.5362	11.138	13.1867	13.3601	12.9322	2.19776	8.98e-13	9.79e-12	>LE01Gene12841	.	PF03992.15^ABM^Antibiotic biosynthesis monooxygenase^29-105^E:3.2e-06	.	.	.	.
>LE01Gene05202	6.69903	7.24153	6.47187	9.67577	9.05937	7.74694	2.19677	3.54e-06	1.33e-05	>LE01Gene05202	BGALA_NEOFI^BGALA_NEOFI^Q:1-3021,H:1-979^34.4%ID^E:2.6e-152^RecName: Full=Probable beta-galactosidase A	PF01301.18^Glyco_hydro_35^Glycosyl hydrolases family 35^43-368^E:3.8e-78`PF10435.8^BetaGal_dom2^Beta-galactosidase, domain 2^407-533^E:1.1e-30`PF13363.5^BetaGal_dom3^Beta-galactosidase, domain 3^574-660^E:4.9e-18`PF13364.5^BetaGal_dom4_5^Beta-galactosidase jelly roll domain^697-786^E:5.7e-13`PF13364.5^BetaGal_dom4_5^Beta-galactosidase jelly roll domain^885-995^E:4e-31	.	KEGG:nfi:NFIA_011250	GO:0005576^cellular_component^extracellular region`GO:0004565^molecular_function^beta-galactosidase activity`GO:0000272^biological_process^polysaccharide catabolic process	.
>LE01Gene07896	5.12829	6.25103	5.65619	7.36416	8.35178	7.89827	2.19648	5.03e-06	1.84e-05	>LE01Gene07896	URE1_BACSU^URE1_BACSU^Q:1540-1899,H:406-536^27.1%ID^E:0.0002^RecName: Full=Urease subunit alpha {ECO:0000255|HAMAP-Rule:MF_01953}	PF01979.19^Amidohydro_1^Amidohydrolase family^317-407^E:5.9e-08`PF07969.10^Amidohydro_3^Amidohydrolase family^369-413^E:2.7e-07	COG1228^amidohydrolase	KEGG:cps:CPS_0911`KO:K01468	GO:0005737^cellular_component^cytoplasm`GO:0050480^molecular_function^imidazolonepropionase activity`GO:0046872^molecular_function^metal ion binding`GO:0019556^biological_process^histidine catabolic process to glutamate and formamide`GO:0019557^biological_process^histidine catabolic process to glutamate and formate	GO:0016787^molecular_function^hydrolase activity
>LE01Gene03642	4.91275	5.67551	5.33419	7.59115	7.97331	6.67562	2.19635	0.000430472	0.00109668	>LE01Gene03642	DBD23_ASPOR^DBD23_ASPOR^Q:85-468,H:3-141^39.6%ID^E:1.8e-20^RecName: Full=2,3-dihydroxybenzoate decarboxylase	PF04909.13^Amidohydro_2^Amidohydrolase^58-155^E:2.7e-09	.	KEGG:ani:AN7911.2	GO:0005829^cellular_component^cytosol`GO:0016831^molecular_function^carboxy-lyase activity`GO:0016787^molecular_function^hydrolase activity`GO:0046872^molecular_function^metal ion binding`GO:1900611^biological_process^F-9775A biosynthetic process`GO:1900614^biological_process^F-9775B biosynthetic process`GO:0019748^biological_process^secondary metabolic process	GO:0016787^molecular_function^hydrolase activity
>LE01Gene02597	9.06314	9.02348	9.3635	10.977	11.8914	10.9863	2.19612	3.72e-08	1.92e-07	>LE01Gene02597	.	.	.	.	.	.
>LE01Gene08389	7.8762	7.82331	7.84542	9.59428	10.0369	10.381	2.1957	4.6e-08	2.34e-07	>LE01Gene08389	HGT1_KLULA^HGT1_KLULA^Q:130-1278,H:107-498^33.6%ID^E:2.2e-51^RecName: Full=High-affinity glucose transporter	PF00083.23^Sugar_tr^Sugar (and other) transporter^48-422^E:6.1e-96`PF07690.15^MFS_1^Major Facilitator Superfamily^223-412^E:4e-08	ENOG410XNQK^Transporter	KEGG:kla:KLLA0A11110g	GO:0016021^cellular_component^integral component of membrane`GO:0022857^molecular_function^transmembrane transporter activity`GO:0008643^biological_process^carbohydrate transport	GO:0022857^molecular_function^transmembrane transporter activity`GO:0055085^biological_process^transmembrane transport`GO:0016021^cellular_component^integral component of membrane
>LE01Gene06489	8.86714	9.65226	10.4545	11.681	12.1705	12.0808	2.19374	1.53e-07	7.2e-07	>LE01Gene06489	Y1220_ASPFU^Y1220_ASPFU^Q:570-1907,H:29-439^36%ID^E:4e-53^RecName: Full=Probable aspartic-type endopeptidase AFUA_3G01220	PF00026.22^Asp^Eukaryotic aspartyl protease^182-551^E:2.2e-41	.	KEGG:afm:AFUA_3G01220`KO:K06004	GO:0005576^cellular_component^extracellular region`GO:0004190^molecular_function^aspartic-type endopeptidase activity`GO:0009405^biological_process^pathogenesis	.
>LE01Gene07411	12.5615	11.6625	12.6378	14.5912	14.6226	14.4047	2.19305	2.79e-07	1.26e-06	>LE01Gene07411	.	.	.	.	.	.
>LE01Gene08756	10.038	9.9124	10.33	12.4643	12.5061	11.8194	2.19248	2.48e-16	4.8e-15	>LE01Gene08756	FSDD_FUSHE^FSDD_FUSHE^Q:282-785,H:9-153^30.2%ID^E:2.2e-13^RecName: Full=Methyltransferase fsdD {ECO:0000303|PubMed:15724180}	.	.	.	.	.
>LE01Gene10763	7.96295	7.98019	8.19245	9.734	10.1808	10.6512	2.19219	7.02e-11	5.62e-10	>LE01Gene10763	YP264_YEAST^YP264_YEAST^Q:327-1346,H:14-325^33%ID^E:2.1e-35^RecName: Full=Probable transport protein YPL264C	PF00892.19^EamA^EamA-like transporter family^55-191^E:2.8e-13`PF00892.19^EamA^EamA-like transporter family^280-392^E:1.1e-08	.	KEGG:sce:YPL264C	GO:0016021^cellular_component^integral component of membrane	GO:0016020^cellular_component^membrane`GO:0016021^cellular_component^integral component of membrane
>LE01Gene01304	9.26556	9.33681	9.80861	12.142	11.1651	11.5683	2.19189	1.74e-09	1.11e-08	>LE01Gene01304	SYRC_YEAST^SYRC_YEAST^Q:112-1965,H:26-607^44.1%ID^E:7.6e-140^RecName: Full=Arginine--tRNA ligase, cytoplasmic	PF00750.18^tRNA-synt_1d^tRNA synthetases class I (R)^128-308^E:9.5e-51`PF00750.18^tRNA-synt_1d^tRNA synthetases class I (R)^345-492^E:3e-33`PF05746.14^DALR_1^DALR anticodon binding domain^507-628^E:1.4e-23	.	KEGG:sce:YDR341C`KO:K01887	GO:0005829^cellular_component^cytosol`GO:0005739^cellular_component^mitochondrion`GO:0004814^molecular_function^arginine-tRNA ligase activity`GO:0005524^molecular_function^ATP binding`GO:0006420^biological_process^arginyl-tRNA aminoacylation`GO:0032543^biological_process^mitochondrial translation	GO:0004814^molecular_function^arginine-tRNA ligase activity`GO:0005524^molecular_function^ATP binding`GO:0006420^biological_process^arginyl-tRNA aminoacylation
>LE01Gene11173	5.31577	5.75489	6.09986	7.84121	8.40622	7.32255	2.18776	5.35e-09	3.19e-08	>LE01Gene11173	.	.	.	.	.	.
>LE01Gene06758	5.16778	3.53605	6.26034	6.82385	7.50561	8.01809	2.18702	1.62e-05	5.37e-05	>LE01Gene06758	.	.	.	.	.	.
>LE01Gene12262	8.25191	8.17075	7.72677	9.8972	10.7718	9.88745	2.18476	5.07e-14	6.89e-13	>LE01Gene12262	.	.	.	.	.	.
>LE01Gene01192	8.62615	8.19941	8.66718	10.7236	10.5507	10.7941	2.1837	2.87e-15	4.78e-14	>LE01Gene01192	RENT1_SCHPO^RENT1_SCHPO^Q:1232-2389,H:373-807^30.2%ID^E:5.2e-26^RecName: Full=ATP-dependent helicase upf1	PF13086.5^AAA_11^AAA domain^412-482^E:1.6e-08`PF13604.5^AAA_30^AAA domain^412-598^E:3.3e-12`PF13245.5^AAA_19^AAA domain^427-597^E:7.9e-12`PF13086.5^AAA_11^AAA domain^523-595^E:8.2e-10`PF13087.5^AAA_12^AAA domain^612-775^E:2e-30	COG1112^Helicase	KEGG:mja:MJ_0104	GO:0005524^molecular_function^ATP binding`GO:0003677^molecular_function^DNA binding`GO:0004386^molecular_function^helicase activity	.
>LE01Gene00650	10.0683	9.20639	10.1585	12.3461	12.0229	11.7143	2.18206	2.18e-12	2.22e-11	>LE01Gene00650	UBC5_YEAST^UBC5_YEAST^Q:46-477,H:5-148^47.2%ID^E:2.2e-35^RecName: Full=Ubiquitin-conjugating enzyme E2-16 kDa	PF00179.25^UQ_con^Ubiquitin-conjugating enzyme^8-144^E:2.9e-41	COG5078^ubiquitin-conjugating enzyme	KEGG:bta:535287`KO:K06689	GO:0005737^cellular_component^cytoplasm`GO:0000151^cellular_component^ubiquitin ligase complex`GO:0005524^molecular_function^ATP binding`GO:0061631^molecular_function^ubiquitin conjugating enzyme activity`GO:0004842^molecular_function^ubiquitin-protein transferase activity`GO:1902916^biological_process^positive regulation of protein polyubiquitination`GO:0070936^biological_process^protein K48-lin…	.
>LE01Gene09818	9.95296	10.104	10.1521	12.0866	12.3862	12.2653	2.18012	9.52e-09	5.44e-08	>LE01Gene09818	FADH_PSEAE^FADH_PSEAE^Q:314-1219,H:72-381^48.1%ID^E:1.4e-65^RecName: Full=Glutathione-independent formaldehyde dehydrogenase	.	.	.	.	.
>LE01Gene01624	7.88215	7.24153	8.36127	10.0616	10.0101	10.1381	2.17712	6.84e-14	9.06e-13	>LE01Gene01624	PGTB2_YEAST^PGTB2_YEAST^Q:22-891,H:7-315^36.6%ID^E:4.2e-49^RecName: Full=Geranylgeranyl transferase type-2 subunit beta	PF00432.20^Prenyltrans^Prenyltransferase and squalene oxidase repeat^57-96^E:6.4e-09`PF00432.20^Prenyltrans^Prenyltransferase and squalene oxidase repeat^117-135^E:0.029`PF00432.20^Prenyltrans^Prenyltransferase and squalene oxidase repeat^141-183^E:1e-09`PF00432.20^Prenyltrans^Prenyltransferase and squalene oxidase repeat^189-230^E:4.1e-10`PF00432.20^Prenyltrans^Prenyltransferase and squalene oxi…	.	KEGG:sce:YPR176C`KO:K05956	GO:0005968^cellular_component^Rab-protein geranylgeranyltransferase complex`GO:0004663^molecular_function^Rab geranylgeranyltransferase activity`GO:0017137^molecular_function^Rab GTPase binding`GO:0008270^molecular_function^zinc ion binding`GO:0006888^biological_process^ER to Golgi vesicle-mediated transport`GO:0018344^biological_process^protein geranylgeranylation`GO:0006612^biological_process^p…	GO:0003824^molecular_function^catalytic activity
>LE01Gene11936	8.83683	8.1562	8.61246	10.121	11.2917	10.5395	2.17473	8.72e-08	4.25e-07	>LE01Gene11936	FUM15_GIBM7^FUM15_GIBM7^Q:113-1528,H:65-557^27.3%ID^E:2.8e-40^RecName: Full=Cytochrome P450 monooxygenase FUM15 {ECO:0000303|PubMed:12620260}	PF00067.21^p450^Cytochrome P450^50-516^E:1.4e-70	.	KEGG:fvr:FVEG_14636	GO:0020037^molecular_function^heme binding`GO:0005506^molecular_function^iron ion binding`GO:0004497^molecular_function^monooxygenase activity`GO:0016705^molecular_function^oxidoreductase activity, acting on paired donors, with incorporation or reduction of molecular oxygen	GO:0005506^molecular_function^iron ion binding`GO:0016705^molecular_function^oxidoreductase activity, acting on paired donors, with incorporation or reduction of molecular oxygen`GO:0020037^molecular_function^heme binding`GO:0055114^biological_process^oxidation-reduction process
>LE01Gene03844	5.93512	6.675	7.22195	9.37395	8.39798	8.6428	2.17455	0.000187578	0.000510589	>LE01Gene03844	.	.	.	.	.	.
>LE01Gene10762	8.08143	8.08118	8.4304	10.1734	10.6855	10.2128	2.17331	1.24e-11	1.12e-10	>LE01Gene10762	YJCD_SCHPO^YJCD_SCHPO^Q:95-682,H:35-224^41.4%ID^E:3e-31^RecName: Full=Uncharacterized oxidoreductase C736.13	PF00106.24^adh_short^short chain dehydrogenase^17-164^E:2e-25`PF08659.9^KR^KR domain^19-110^E:4.7e-08`PF13561.5^adh_short_C2^Enoyl-(Acyl carrier protein) reductase^26-163^E:5.2e-15	.	KEGG:spo:SPCC736.13	GO:0016491^molecular_function^oxidoreductase activity	.
>LE01Gene13909	7.07641	6.96935	7.89517	9.64237	9.55444	9.41079	2.17097	2.55e-17	5.47e-16	>LE01Gene13909	.	.	.	.	.	.
>LE01Gene05430	8.90561	8.93251	9.30258	11.196	11.4441	11.0038	2.16959	9.22e-13	1e-11	>LE01Gene05430	.	PF13242.5^Hydrolase_like^HAD-hyrolase-like^173-226^E:0.00016	.	.	.	.
>LE01Gene12831	6.82789	6.7544	7.2509	9.38206	9.07238	8.8604	2.16926	2.74e-12	2.74e-11	>LE01Gene12831	LPP60_RAT^LPP60_RAT^Q:349-1350,H:29-361^44.5%ID^E:2.3e-78^RecName: Full=60 kDa lysophospholipase	PF00710.19^Asparaginase^Asparaginase, N-terminal^21-307^E:5.3e-56`PF13637.5^Ank_4^Ankyrin repeats (many copies)^528-598^E:9.3e-07`PF12796.6^Ank_2^Ankyrin repeats (3 copies)^529-631^E:3.9e-13`PF00023.29^Ank^Ankyrin repeat^578-608^E:0.0005	COG0252^L-asparaginase`COG0666^Ankyrin Repeat	KEGG:rno:246266`KO:K13278	GO:0003847^molecular_function^1-alkyl-2-acetylglycerophosphocholine esterase activity`GO:0004067^molecular_function^asparaginase activity`GO:0004622^molecular_function^lysophospholipase activity`GO:0006530^biological_process^asparagine catabolic process`GO:0006528^biological_process^asparagine metabolic process`GO:0016042^biological_process^lipid catabolic process`GO:0006644^biological_process^ph…	GO:0005515^molecular_function^protein binding
>LE01Gene04013	8.94023	8.64018	8.25094	10.9669	11.1963	9.98332	2.16831	2.44e-08	1.3e-07	>LE01Gene04013	.	.	.	.	.	.
>LE01Gene03637	9.58657	9.16097	9.58432	10.7308	11.4846	12.2559	2.16621	1.25e-09	8.2e-09	>LE01Gene03637	DIP5_YEAST^DIP5_YEAST^Q:13-1626,H:36-577^36%ID^E:3.5e-92^RecName: Full=Dicarboxylic amino acid permease	.	.	.	.	.
>LE01Gene11543	3.42053	5.0774	4.65594	6.7124	7.09066	5.92859	2.16614	2.66e-06	1.03e-05	>LE01Gene11543	.	.	.	.	.	.
>LE01Gene00976	11.6006	11.8975	11.3009	13.7601	14.4057	12.7063	2.16232	6.16e-11	4.99e-10	>LE01Gene00976	CLM2_GIBZE^CLM2_GIBZE^Q:676-2133,H:16-507^41.4%ID^E:1.1e-104^RecName: Full=Cytochrome P450 monooxygenase CLM2 {ECO:0000303|PubMed:26673640}	PF00067.21^p450^Cytochrome P450^12-471^E:9.9e-76	.	.	GO:0020037^molecular_function^heme binding`GO:0005506^molecular_function^iron ion binding`GO:0004497^molecular_function^monooxygenase activity`GO:0016705^molecular_function^oxidoreductase activity, acting on paired donors, with incorporation or reduction of molecular oxygen	GO:0005506^molecular_function^iron ion binding`GO:0016705^molecular_function^oxidoreductase activity, acting on paired donors, with incorporation or reduction of molecular oxygen`GO:0020037^molecular_function^heme binding`GO:0055114^biological_process^oxidation-reduction process
>LE01Gene01004	9.18123	9.08365	9.1699	10.8401	12.0593	10.5425	2.16183	4.4e-08	2.24e-07	>LE01Gene01004	.	.	.	.	.	.
>LE01Gene04773	8.10197	8.03952	8.63093	10.2441	10.6329	10.4185	2.16175	3.77e-15	6.17e-14	>LE01Gene04773	YIZG_SCHPO^YIZG_SCHPO^Q:372-1718,H:35-482^33.8%ID^E:9.5e-73^RecName: Full=Uncharacterized transporter C1002.16c	PF07690.15^MFS_1^Major Facilitator Superfamily^50-413^E:3.2e-40	.	KEGG:spo:SPAC1002.16c	GO:0032153^cellular_component^cell division site`GO:0051286^cellular_component^cell tip`GO:0005794^cellular_component^Golgi apparatus`GO:0016021^cellular_component^integral component of membrane`GO:0046943^molecular_function^carboxylic acid transmembrane transporter activity`GO:1905039^biological_process^carboxylic acid transmembrane transport	GO:0055085^biological_process^transmembrane transport`GO:0016021^cellular_component^integral component of membrane
>LE01Gene13790	3.28342	4.40847	4.25985	6.41305	6.18024	5.80076	2.16064	3.58e-06	1.35e-05	>LE01Gene13790	.	.	.	.	.	.
>LE01Gene04563	0	1.96011	3.5965	5.11629	3.41473	4.29223	2.16049	0.00389751	0.00809626	>LE01Gene04563	.	.	.	.	.	.
>LE01Gene09277	8.4611	7.88342	8.16735	10.3534	10.0929	10.5515	2.15865	9.84e-13	1.06e-11	>LE01Gene09277	YAKA_SCHPO^YAKA_SCHPO^Q:46-720,H:3-221^38.6%ID^E:2.1e-31^RecName: Full=Uncharacterized protein C1F7.10	PF01177.21^Asp_Glu_race^Asp/Glu/Hydantoin racemase^82-229^E:2.2e-07	.	KEGG:spo:SPAC1F7.10	GO:0005829^cellular_component^cytosol`GO:0005634^cellular_component^nucleus`GO:0036361^molecular_function^racemase activity, acting on amino acids and derivatives`GO:0006807^biological_process^nitrogen compound metabolic process	GO:0036361^molecular_function^racemase activity, acting on amino acids and derivatives`GO:0006807^biological_process^nitrogen compound metabolic process
>LE01Gene12854	8.55718	8.3476	8.8643	10.0154	11.2046	10.8124	2.15502	1.76e-11	1.55e-10	>LE01Gene12854	YQE1_SCHPO^YQE1_SCHPO^Q:209-1462,H:26-410^45.7%ID^E:2.5e-101^RecName: Full=Putative dioxygenase C576.01c	PF02668.15^TauD^Taurine catabolism dioxygenase TauD, TfdA family^20-395^E:4.2e-36	.	KEGG:spo:SPCC576.01c	GO:0005829^cellular_component^cytosol`GO:0005634^cellular_component^nucleus`GO:0097641^molecular_function^alpha-ketoglutarate-dependent xanthine dioxygenase activity`GO:0005506^molecular_function^iron ion binding`GO:0006151^biological_process^xanthine oxidation	GO:0016491^molecular_function^oxidoreductase activity`GO:0055114^biological_process^oxidation-reduction process
>LE01Gene05216	9.27464	8.78588	9.24618	11.5557	11.2608	10.9293	2.15431	4.01e-12	3.9e-11	>LE01Gene05216	DGOD_VARPS^DGOD_VARPS^Q:55-1257,H:8-381^45.3%ID^E:1.1e-101^RecName: Full=D-galactonate dehydratase {ECO:0000255|HAMAP-Rule:MF_01289}	PF02746.15^MR_MLE_N^Mandelate racemase / muconate lactonizing enzyme, N-terminal domain^13-118^E:8.2e-23`PF13378.5^MR_MLE_C^Enolase C-terminal domain-like^142-390^E:3.3e-54	COG4948^mandelate racemase muconate lactonizing	KEGG:vap:Vapar_5329`KO:K01684	GO:0008869^molecular_function^galactonate dehydratase activity`GO:0046872^molecular_function^metal ion binding`GO:0009063^biological_process^cellular amino acid catabolic process`GO:0034194^biological_process^D-galactonate catabolic process	.
>LE01Gene11523	8.89682	8.88919	10.2723	11.5859	11.5268	11.85	2.15282	2.66e-10	1.95e-09	>LE01Gene11523	.	.	.	.	.	.
>LE01Gene09364	8.90853	9.02881	9.02378	11.3595	11.1088	10.9109	2.15227	4.11e-11	3.42e-10	>LE01Gene09364	.	.	.	.	.	.
>LE01Gene04818	3.66094	5.50231	6.16215	7.18093	7.89347	7.5059	2.15135	9.05e-07	3.76e-06	>LE01Gene04818	.	.	.	.	.	.
>LE01Gene11447	9.59383	9.80616	10.1106	12.139	11.8319	12.0154	2.14961	1.91e-15	3.27e-14	>LE01Gene11447	DIOX2_ARATH^DIOX2_ARATH^Q:79-1164,H:7-331^35.4%ID^E:2e-47^RecName: Full=Probable 2-oxoglutarate-dependent dioxygenase At3g50210	PF14226.5^DIOX_N^non-haem dioxygenase in morphine synthesis N-terminal^14-137^E:7e-23`PF03171.19^2OG-FeII_Oxy^2OG-Fe(II) oxygenase superfamily^193-321^E:3e-12	COG3491^2OGFe(II) oxygenase	KEGG:ath:AT3G50210	GO:0051213^molecular_function^dioxygenase activity`GO:0046872^molecular_function^metal ion binding`GO:0009267^biological_process^cellular response to starvation	GO:0016491^molecular_function^oxidoreductase activity`GO:0055114^biological_process^oxidation-reduction process
>LE01Gene14614	6.85234	8.28212	7.71988	9.51716	10.625	8.97441	2.14754	6.71e-07	2.84e-06	>LE01Gene14614	.	.	.	.	.	.
>LE01Gene07782	6.06631	5.72891	4.65594	7.65282	8.00079	7.45585	2.14504	1.51e-09	9.75e-09	>LE01Gene07782	.	.	.	.	.	.
>LE01Gene11851	10.8931	11.0127	10.322	12.2648	12.3482	13.6733	2.14489	0.000330669	0.000860992	>LE01Gene11851	.	.	.	.	.	.
>LE01Gene13312	4.35154	5.30544	4.4043	6.67326	7.27299	6.52194	2.14393	2.11e-07	9.69e-07	>LE01Gene13312	.	.	.	.	.	.
>LE01Gene02962	6.80302	6.64753	7.09995	9.28369	9.0007	8.63157	2.14373	1.38e-05	4.64e-05	>LE01Gene02962	.	.	.	.	.	.
>LE01Gene06662	11.1745	12.8869	12.6071	13.1521	15.0932	14.7255	2.14178	5.38e-06	1.95e-05	>LE01Gene06662	.	.	.	.	.	.
>LE01Gene11638	0	4.59259	3.01101	5.03628	5.8096	5.56929	2.13983	0.000537971	0.00134504	>LE01Gene11638	.	.	.	.	.	.
>LE01Gene10609	6.34999	6.17611	5.89501	7.82344	8.90214	7.8147	2.13946	3.23e-06	1.23e-05	>LE01Gene10609	.	.	.	.	.	.
>LE01Gene05678	9.79325	9.79524	10.8102	12.5406	12.0389	12.439	2.13892	7.15e-06	2.53e-05	>LE01Gene05678	USTF2_ASPFN^USTF2_ASPFN^Q:198-1625,H:8-459^29.5%ID^E:1.2e-49^RecName: Full=Flavin-containing monooxygenase ustF2 {ECO:0000303|PubMed:24841822}	.	.	.	.	.
>LE01Gene07112	9.10189	9.52595	10.0377	11.644	11.8969	11.6729	2.13794	1.68e-05	5.57e-05	>LE01Gene07112	SOU1_SCHPO^SOU1_SCHPO^Q:238-1011,H:3-245^35.7%ID^E:7e-35^RecName: Full=Sorbose reductase sou1	PF00106.24^adh_short^short chain dehydrogenase^90-294^E:6e-38`PF08659.9^KR^KR domain^90-253^E:6.2e-12`PF13561.5^adh_short_C2^Enoyl-(Acyl carrier protein) reductase^96-336^E:2.1e-51	.	KEGG:spo:SPAC8E11.10`KO:K17742	GO:0005739^cellular_component^mitochondrion`GO:0032115^molecular_function^sorbose reductase activity`GO:0005975^biological_process^carbohydrate metabolic process	.
>LE01Gene00447	8.21468	8.38551	8.33447	10.4473	10.6821	10.1669	2.13764	3.15e-18	7.91e-17	>LE01Gene00447	AMDS_ASPOR^AMDS_ASPOR^Q:235-1893,H:4-539^43.4%ID^E:5.6e-124^RecName: Full=Acetamidase	.	.	.	.	.
>LE01Gene11255	5.44997	5.37409	4.4043	7.29707	8.00079	5.47192	2.13717	1.18e-05	4.02e-05	>LE01Gene11255	.	.	.	.	.	.
>LE01Gene07915	5.93512	6.76722	6.4387	9.45697	8.07505	7.19615	2.13662	0.00214222	0.00472453	>LE01Gene07915	.	.	.	.	.	.
>LE01Gene05090	5.95783	7.36473	8.28866	10.1319	8.83655	9.61272	2.13645	0.00017121	0.000468872	>LE01Gene05090	GANA_EMENI^GANA_EMENI^Q:635-1579,H:7-322^47.2%ID^E:2.5e-75^RecName: Full=Arabinogalactan endo-beta-1,4-galactanase A	.	.	.	.	.
>LE01Gene01677	7.50428	8.05005	7.89517	10.0206	9.99792	9.86685	2.13408	7.41e-18	1.75e-16	>LE01Gene01677	.	.	.	.	.	.
>LE01Gene09247	8.44913	8.23676	8.77742	10.7108	10.8334	10.31	2.13317	4.3e-17	8.99e-16	>LE01Gene09247	YUC3_ARATH^YUC3_ARATH^Q:783-1613,H:96-353^29.8%ID^E:2.3e-19^RecName: Full=Probable indole-3-pyruvate monooxygenase YUCCA3	PF07992.13^Pyr_redox_2^Pyridine nucleotide-disulphide oxidoreductase^180-381^E:7.6e-09`PF00743.18^FMO-like^Flavin-binding monooxygenase-like^239-515^E:2.7e-18`PF13738.5^Pyr_redox_3^Pyridine nucleotide-disulphide oxidoreductase^247-392^E:6.5e-13`PF13434.5^K_oxygenase^L-lysine 6-monooxygenase (NADPH-requiring)^282-387^E:8.1e-11	COG2072^Monooxygenase	KEGG:ath:AT1G04610`KO:K11816	GO:0050660^molecular_function^flavin adenine dinucleotide binding`GO:0103075^molecular_function^indole-3-pyruvate monooxygenase activity`GO:0004499^molecular_function^N,N-dimethylaniline monooxygenase activity`GO:0050661^molecular_function^NADP binding`GO:0009851^biological_process^auxin biosynthetic process	GO:0016491^molecular_function^oxidoreductase activity`GO:0055114^biological_process^oxidation-reduction process`GO:0004499^molecular_function^N,N-dimethylaniline monooxygenase activity`GO:0050660^molecular_function^flavin adenine dinucleotide binding`GO:0050661^molecular_function^NADP binding
>LE01Gene12390	9.50603	9.66773	9.55366	11.6347	11.9602	11.4907	2.13285	6.37e-17	1.31e-15	>LE01Gene12390	.	.	.	.	.	.
>LE01Gene13075	6.18655	6.64753	6.18233	8.31808	8.67879	8.40414	2.1327	1.87e-11	1.63e-10	>LE01Gene13075	.	.	.	.	.	.
>LE01Gene06056	8.82453	8.84754	9.86432	11.4075	11.4004	11.3799	2.13269	7.78e-10	5.3e-09	>LE01Gene06056	.	.	.	.	.	.
>LE01Gene04173	10.5974	10.4294	10.9344	13.0331	12.5776	12.7454	2.12926	2.02e-15	3.44e-14	>LE01Gene04173	SLT2_YEAST^SLT2_YEAST^Q:59-1144,H:5-363^64.3%ID^E:1.2e-139^RecName: Full=Mitogen-activated protein kinase SLT2/MPK1	.	.	.	.	.
>LE01Gene08916	8.44913	8.29103	8.45134	10.829	10.5187	10.1394	2.12739	5.27e-18	1.27e-16	>LE01Gene08916	YN8C_SCHPO^YN8C_SCHPO^Q:39-632,H:5-200^41%ID^E:9.5e-37^RecName: Full=Uncharacterized Nudix hydrolase P35G2.12	PF00293.27^NUDIX^NUDIX domain^63-189^E:1.3e-15	.	KEGG:spo:SPBP35G2.12`KO:K01515	GO:0005829^cellular_component^cytosol`GO:0005634^cellular_component^nucleus`GO:0047631^molecular_function^ADP-ribose diphosphatase activity`GO:0009191^biological_process^ribonucleoside diphosphate catabolic process	GO:0016787^molecular_function^hydrolase activity
>LE01Gene04726	11.2472	11.2504	11.7221	14.0379	13.0145	13.4114	2.12641	3.47e-15	5.71e-14	>LE01Gene04726	ADK_SCHCO^ADK_SCHCO^Q:48-1079,H:1-344^67.7%ID^E:2.1e-137^RecName: Full=Adenosine kinase	PF00294.23^PfkB^pfkB family carbohydrate kinase^28-340^E:2.2e-66	COG0524^pfkb domain protein	.	GO:0004001^molecular_function^adenosine kinase activity`GO:0005524^molecular_function^ATP binding`GO:0044209^biological_process^AMP salvage`GO:0006166^biological_process^purine ribonucleoside salvage	.
>LE01Gene05616	6.24311	6.87775	6.56704	8.32652	8.73223	8.97144	2.12589	2.28e-15	3.85e-14	>LE01Gene05616	.	.	.	.	.	.
>LE01Gene12483	9.09678	9.62082	9.67612	11.1137	12.3617	10.8788	2.1221	1.4e-05	4.72e-05	>LE01Gene12483	YKN3_SCHPO^YKN3_SCHPO^Q:125-1357,H:16-407^39%ID^E:5.3e-75^RecName: Full=Uncharacterized lactate 2-monooxygenase PB1A11.03	PF01070.17^FMN_dh^FMN-dependent dehydrogenase^46-421^E:1.6e-104`PF03060.14^NMO^Nitronate monooxygenase^295-428^E:3.2e-07`PF01645.16^Glu_synthase^Conserved region in glutamate synthase^344-379^E:6.4e-05	.	KEGG:spo:SPAPB1A11.03`KO:K00467	GO:0005758^cellular_component^mitochondrial intermembrane space`GO:0005634^cellular_component^nucleus`GO:0010181^molecular_function^FMN binding`GO:0004460^molecular_function^L-lactate dehydrogenase (cytochrome) activity`GO:0050040^molecular_function^lactate 2-monooxygenase activity`GO:1990748^biological_process^cellular detoxification`GO:0006089^biological_process^lactate metabolic process	GO:0016491^molecular_function^oxidoreductase activity`GO:0018580^molecular_function^nitronate monooxygenase activity`GO:0055114^biological_process^oxidation-reduction process`GO:0015930^molecular_function^glutamate synthase activity`GO:0016638^molecular_function^oxidoreductase activity, acting on the CH-NH2 group of donors`GO:0006537^biological_process^glutamate biosynthetic process
>LE01Gene04084	6.1672	7.32193	6.50429	9.15226	8.68219	8.68685	2.11908	1.5e-09	9.69e-09	>LE01Gene04084	.	.	.	.	.	.
>LE01Gene07012	9.88646	9.90807	10.3026	12.2385	12.0023	12.2365	2.119	1.1e-16	2.19e-15	>LE01Gene07012	AROF_NEUCR^AROF_NEUCR^Q:39-1466,H:10-477^51.3%ID^E:2.2e-139^RecName: Full=Phospho-2-dehydro-3-deoxyheptonate aldolase	PF01474.15^DAHP_synth_2^Class-II DAHP synthetase family^7-464^E:3.2e-198	.	KEGG:ncr:NCU02785`KO:K01626	GO:0003849^molecular_function^3-deoxy-7-phosphoheptulonate synthase activity`GO:0009073^biological_process^aromatic amino acid family biosynthetic process`GO:0009423^biological_process^chorismate biosynthetic process	GO:0003849^molecular_function^3-deoxy-7-phosphoheptulonate synthase activity`GO:0009073^biological_process^aromatic amino acid family biosynthetic process
>LE01Gene09227	7.31497	6.23266	7.98981	9.98374	9.16029	9.03816	2.11823	1.45e-06	5.83e-06	>LE01Gene09227	MTND_ASPFU^MTND_ASPFU^Q:859-1362,H:1-143^26.7%ID^E:1.5e-08^RecName: Full=1,2-dihydroxy-3-keto-5-methylthiopentene dioxygenase {ECO:0000255|HAMAP-Rule:MF_03154}	PF03079.13^ARD^ARD/ARD' family^110-150^E:1.7e-05	.	.	.	GO:0010309^molecular_function^acireductone dioxygenase [iron(II)-requiring] activity`GO:0055114^biological_process^oxidation-reduction process
>LE01Gene06506	6.57231	6.54704	6.69896	8.84395	8.69234	8.5935	2.11796	1.5e-18	3.92e-17	>LE01Gene06506	.	.	.	.	.	.
>LE01Gene06092	7.27031	7.10681	7.68494	9.32216	9.52447	9.59356	2.11681	3.77e-18	9.37e-17	>LE01Gene06092	OXDA_TRIVR^OXDA_TRIVR^Q:7-786,H:73-348^35.8%ID^E:9.9e-32^RecName: Full=D-amino-acid oxidase	.	.	.	.	.
>LE01Gene11679	11.5562	11.5727	12.1431	13.7655	14.2184	13.6409	2.11309	2.11e-11	1.82e-10	>LE01Gene11679	SDO1L_SCHPO^SDO1L_SCHPO^Q:71-334,H:9-95^46.7%ID^E:1.9e-11^RecName: Full=SDO1-like protein C21C3.19	PF01172.17^SBDS^Shwachman-Bodian-Diamond syndrome (SBDS) protein^6-93^E:1.2e-19	.	KEGG:spo:SPBC21C3.19	GO:0005737^cellular_component^cytoplasm`GO:0005829^cellular_component^cytosol`GO:0005634^cellular_component^nucleus`GO:0003723^molecular_function^RNA binding`GO:0042254^biological_process^ribosome biogenesis`GO:0006364^biological_process^rRNA processing	.
>LE01Gene09406	9.10698	11.1975	11.163	11.1983	13.637	12.8379	2.11026	0.000126564	0.000355515	>LE01Gene09406	TMM69_XENTR^TMM69_XENTR^Q:391-882,H:101-243^28.6%ID^E:5.4e-05^RecName: Full=Transmembrane protein 69	PF11911.7^DUF3429^Protein of unknown function (DUF3429)^111-269^E:2e-37	.	.	.	.
>LE01Gene06955	6.79043	7.20431	6.78065	9.13795	8.71574	9.21657	2.10901	8.1e-18	1.89e-16	>LE01Gene06955	MFSD1_HUMAN^MFSD1_HUMAN^Q:825-1955,H:39-413^21.2%ID^E:1.2e-08^RecName: Full=Major facilitator superfamily domain-containing protein 1	PF07690.15^MFS_1^Major Facilitator Superfamily^77-384^E:5.5e-22	COG0477^major facilitator Superfamily	KEGG:hsa:64747	GO:0016021^cellular_component^integral component of membrane`GO:0055085^biological_process^transmembrane transport	GO:0055085^biological_process^transmembrane transport`GO:0016021^cellular_component^integral component of membrane
>LE01Gene03476	10.6576	11.0778	11.2581	13.0912	13.3174	12.9446	2.10736	2.24e-18	5.72e-17	>LE01Gene03476	LSP1_YEAST^LSP1_YEAST^Q:303-911,H:58-261^23.8%ID^E:3.4e-11^RecName: Full=Sphingolipid long chain base-responsive protein LSP1	.	.	.	.	.
>LE01Gene01907	9.34308	9.44249	9.82474	12.0025	11.6045	11.2641	2.10479	1.73e-09	1.1e-08	>LE01Gene01907	ILV3_SCHPO^ILV3_SCHPO^Q:313-2001,H:36-595^55.3%ID^E:1.3e-170^RecName: Full=Putative dihydroxy-acid dehydratase, mitochondrial	PF00920.20^ILVD_EDD^Dehydratase family^55-581^E:2.7e-195	.	KEGG:spo:SPAC17G8.06c`KO:K01687	GO:0005739^cellular_component^mitochondrion`GO:0051539^molecular_function^4 iron, 4 sulfur cluster binding`GO:0004160^molecular_function^dihydroxy-acid dehydratase activity`GO:0046872^molecular_function^metal ion binding`GO:0009097^biological_process^isoleucine biosynthetic process`GO:0006551^biological_process^leucine metabolic process`GO:0009099^biological_process^valine biosynthetic process	GO:0003824^molecular_function^catalytic activity
>LE01Gene02980	7.75825	7.52428	7.11052	9.69544	10.0865	8.60885	2.10428	0.000119989	0.00033892	>LE01Gene02980	.	.	.	.	.	.
>LE01Gene02633	6.51221	6.07662	6.05678	7.6728	8.75822	8.32735	2.1029	2.9e-05	9.24e-05	>LE01Gene02633	.	.	.	.	.	.
>LE01Gene05211	14.5691	13.3129	14.1682	16.816	16.1264	15.2941	2.1022	5.51e-09	3.27e-08	>LE01Gene05211	DUG3_YEAST^DUG3_YEAST^Q:66-938,H:1-241^27.1%ID^E:1.4e-18^RecName: Full=Probable glutamine amidotransferase DUG3	PF13522.5^GATase_6^Glutamine amidotransferase domain^98-195^E:2.5e-06	.	.	.	.
>LE01Gene05854	7.99074	7.3392	7.97253	9.41605	9.63029	10.425	2.09936	4.29e-08	2.19e-07	>LE01Gene05854	DUR3_YEAST^DUR3_YEAST^Q:444-2426,H:6-682^37.5%ID^E:1.2e-121^RecName: Full=Urea active transporter	PF00474.16^SSF^Sodium:solute symporter family^54-468^E:6.3e-24	.	KEGG:sce:YHL016C`KO:K20989	GO:0005887^cellular_component^integral component of plasma membrane`GO:0005886^cellular_component^plasma membrane`GO:0015489^molecular_function^putrescine transmembrane transporter activity`GO:0015606^molecular_function^spermidine transmembrane transporter activity`GO:0015293^molecular_function^symporter activity`GO:0015204^molecular_function^urea transmembrane transporter activity`GO:0015847^bio…	GO:0022857^molecular_function^transmembrane transporter activity`GO:0055085^biological_process^transmembrane transport`GO:0016020^cellular_component^membrane
>LE01Gene12180	8.81523	11.0479	10.789	10.8613	13.4054	12.5176	2.09933	0.00359969	0.00753788	>LE01Gene12180	.	.	.	.	.	.
>LE01Gene12381	10.278	9.07594	9.06512	11.1468	12.6438	10.2887	2.09926	3.56e-05	0.000111023	>LE01Gene12381	PANP_ALIF1^PANP_ALIF1^Q:1460-2143,H:215-388^26.8%ID^E:8.2e-15^RecName: Full=Aspartate 1-decarboxylase {ECO:0000303|PubMed:28446608}	PF00282.18^Pyridoxal_deC^Pyridoxal-dependent decarboxylase conserved domain^81-177^E:6.8e-07`PF00282.18^Pyridoxal_deC^Pyridoxal-dependent decarboxylase conserved domain^257-379^E:3.5e-08	.	.	.	GO:0016831^molecular_function^carboxy-lyase activity`GO:0030170^molecular_function^pyridoxal phosphate binding`GO:0019752^biological_process^carboxylic acid metabolic process
>LE01Gene14216	11.2339	11.225	11.6406	13.7615	13.1168	13.4798	2.09704	2.73e-12	2.74e-11	>LE01Gene14216	GPMI_ONCVO^GPMI_ONCVO^Q:28-1599,H:1-515^57.1%ID^E:1.5e-168^RecName: Full=2,3-bisphosphoglycerate-independent phosphoglycerate mutase {ECO:0000305|PubMed:17897734}	PF01676.17^Metalloenzyme^Metalloenzyme superfamily^7-510^E:3.4e-69`PF06415.12^iPGM_N^BPG-independent PGAM N-terminus (iPGM_N)^86-300^E:1.1e-76`PF00884.22^Sulfatase^Sulfatase^316-508^E:3.6e-06	.	.	GO:0005737^cellular_component^cytoplasm`GO:0030145^molecular_function^manganese ion binding`GO:0004619^molecular_function^phosphoglycerate mutase activity`GO:0006007^biological_process^glucose catabolic process`GO:0006096^biological_process^glycolytic process	GO:0003824^molecular_function^catalytic activity`GO:0046872^molecular_function^metal ion binding`GO:0004619^molecular_function^phosphoglycerate mutase activity`GO:0030145^molecular_function^manganese ion binding`GO:0006007^biological_process^glucose catabolic process`GO:0005737^cellular_component^cytoplasm`GO:0008484^molecular_function^sulfuric ester hydrolase activity
>LE01Gene11207	5.35051	5.53266	6.12092	7.6794	7.91096	7.73999	2.09676	2.22e-14	3.2e-13	>LE01Gene11207	.	.	.	.	.	.
>LE01Gene05622	7.73214	8.58694	9.10795	11.239	10.6241	9.81816	2.09501	8.82e-06	3.08e-05	>LE01Gene05622	EXG1_COCCA^EXG1_COCCA^Q:56-2344,H:15-781^41.6%ID^E:1.4e-159^RecName: Full=Glucan 1,3-beta-glucosidase	PF12708.6^Pectate_lyase_3^Pectate lyase superfamily protein^75-302^E:1.5e-85`PF12708.6^Pectate_lyase_3^Pectate lyase superfamily protein^431-543^E:1.4e-14	ENOG410XTFG^glycoside hydrolase family 55 protein	KEGG:abe:ARB_02077	GO:0005576^cellular_component^extracellular region`GO:0042973^molecular_function^glucan endo-1,3-beta-D-glucosidase activity`GO:0008152^biological_process^metabolic process	.
>LE01Gene04335	8.89682	8.99651	9.24138	11.1698	11.3442	10.8827	2.0947	1.24e-28	1.33e-26	>LE01Gene04335	.	.	.	.	.	.
>LE01Gene06157	8.89388	8.90667	9.25811	11.1498	11.3269	10.8444	2.09315	5.8e-15	9.23e-14	>LE01Gene06157	KCAB_SCHPO^KCAB_SCHPO^Q:274-1269,H:8-337^58%ID^E:5.1e-101^RecName: Full=Putative voltage-gated potassium channel subunit beta	.	.	.	.	.
>LE01Gene12613	9.56823	9.65571	9.71127	11.5584	11.7978	11.8411	2.09281	1.2e-12	1.28e-11	>LE01Gene12613	PIRL_SOLLC^PIRL_SOLLC^Q:338-1234,H:2-291^46.3%ID^E:3.2e-68^RecName: Full=Pirin-like protein	PF02678.15^Pirin^Pirin^75-171^E:2.8e-29`PF05726.12^Pirin_C^Pirin C-terminal cupin domain^236-333^E:2e-23	COG1741^pirin domain protein	KEGG:sly:543607`KO:K06911	GO:0005634^cellular_component^nucleus	.
>LE01Gene09443	8.02878	8.40204	8.37009	10.2057	10.6417	10.1952	2.09014	2.3e-29	2.66e-27	>LE01Gene09443	FMAA_ASPFU^FMAA_ASPFU^Q:1154-1933,H:14-272^32.5%ID^E:2e-20^RecName: Full=Fumagillin beta-trans-bergamotene synthase af520 {ECO:0000303|PubMed:23488861}	PF01040.17^UbiA^UbiA prenyltransferase family^26-259^E:4.3e-17	.	.	.	GO:0016765^molecular_function^transferase activity, transferring alkyl or aryl (other than methyl) groups`GO:0016021^cellular_component^integral component of membrane
>LE01Gene12715	8.00717	9.8262	10.7268	11.8804	12.1611	11.8973	2.08996	6.53e-05	0.000194546	>LE01Gene12715	Y1220_ASPFU^Y1220_ASPFU^Q:214-1371,H:77-433^36.8%ID^E:8.7e-55^RecName: Full=Probable aspartic-type endopeptidase AFUA_3G01220	PF00026.22^Asp^Eukaryotic aspartyl protease^93-461^E:1.8e-49	.	KEGG:afm:AFUA_3G01220`KO:K06004	GO:0005576^cellular_component^extracellular region`GO:0004190^molecular_function^aspartic-type endopeptidase activity`GO:0009405^biological_process^pathogenesis	.
>LE01Gene11285	8.31043	8.33043	8.52825	10.4995	10.6573	10.2488	2.08879	7.89e-32	1.28e-29	>LE01Gene11285	.	.	.	.	.	.
>LE01Gene10314	10.0657	10.4162	10.8682	12.3973	12.8399	12.4476	2.08876	2.28e-17	4.95e-16	>LE01Gene10314	DBP2_CRYNB^DBP2_CRYNB^Q:115-1221,H:52-420^78.6%ID^E:1e-174^RecName: Full=ATP-dependent RNA helicase DBP2-A	PF00270.28^DEAD^DEAD/DEAH box helicase^103-274^E:3.9e-52`PF04851.14^ResIII^Type III restriction enzyme, res subunit^119-267^E:8.4e-07`PF00271.30^Helicase_C^Helicase conserved C-terminal domain^310-389^E:1.9e-13`PF00271.30^Helicase_C^Helicase conserved C-terminal domain^536-564^E:0.00025	COG0513^purine NTP-dependent helicase activity	KEGG:cnb:CNBF3470`KO:K12823	GO:0005737^cellular_component^cytoplasm`GO:0005634^cellular_component^nucleus`GO:0005524^molecular_function^ATP binding`GO:0004386^molecular_function^helicase activity`GO:0003723^molecular_function^RNA binding`GO:0000184^biological_process^nuclear-transcribed mRNA catabolic process, nonsense-mediated decay`GO:0006364^biological_process^rRNA processing	GO:0003676^molecular_function^nucleic acid binding`GO:0005524^molecular_function^ATP binding`GO:0003677^molecular_function^DNA binding`GO:0016787^molecular_function^hydrolase activity
>LE01Gene02230	9.32791	9.56134	9.88139	11.7489	11.6503	11.6842	2.08842	6.12e-15	9.68e-14	>LE01Gene02230	ALN_YEAST^ALN_YEAST^Q:426-1733,H:18-455^50.3%ID^E:5.7e-123^RecName: Full=Allantoinase	PF01979.19^Amidohydro_1^Amidohydrolase family^68-447^E:2.4e-38`PF07969.10^Amidohydro_3^Amidohydrolase family^366-448^E:1.1e-08	.	KEGG:sce:YIR027C`KO:K01466	GO:0005737^cellular_component^cytoplasm`GO:0004038^molecular_function^allantoinase activity`GO:0050897^molecular_function^cobalt ion binding`GO:0016888^molecular_function^endodeoxyribonuclease activity, producing 5'-phosphomonoesters`GO:0008270^molecular_function^zinc ion binding`GO:0009442^biological_process^allantoin assimilation pathway`GO:0006145^biological_process^purine nucleobase catabolic…	GO:0016787^molecular_function^hydrolase activity
>LE01Gene08083	9.57926	8.80777	8.8549	11.2318	11.2811	11.1182	2.08791	7.71e-17	1.56e-15	>LE01Gene08083	.	.	.	.	.	.
>LE01Gene04627	6.82789	6.66133	8.00688	9.31582	9.84259	8.78133	2.08724	4.64e-05	0.000142288	>LE01Gene04627	.	.	.	.	.	.
>LE01Gene07553	6.73891	6.33953	7.35235	8.09433	9.5339	8.8668	2.08643	1.82e-05	6.01e-05	>LE01Gene07553	FCY2_EMENI^FCY2_EMENI^Q:166-1551,H:52-507^48.2%ID^E:1.3e-108^RecName: Full=Purine-cytosine permease fcyB	.	.	.	.	.
>LE01Gene01628	7.40035	8.47419	8.39192	9.17812	10.5692	10.5897	2.0844	6.19e-08	3.08e-07	>LE01Gene01628	.	.	.	.	.	.
>LE01Gene07773	12.638	12.7733	13.0269	14.8436	15.0015	14.8653	2.08347	8.11e-21	2.87e-19	>LE01Gene07773	APDF_EMENI^APDF_EMENI^Q:143-1360,H:5-403^37.3%ID^E:1.3e-64^RecName: Full=Aspyridones efflux protein apdF {ECO:0000303|PubMed:17369821}	PF07690.15^MFS_1^Major Facilitator Superfamily^62-307^E:2.3e-16	.	KEGG:ani:AN8413.2	GO:0071627^cellular_component^integral component of fungal-type vacuolar membrane`GO:0005886^cellular_component^plasma membrane`GO:0005215^molecular_function^transporter activity`GO:0034220^biological_process^ion transmembrane transport	GO:0055085^biological_process^transmembrane transport`GO:0016021^cellular_component^integral component of membrane
>LE01Gene00395	8.6577	8.75726	8.88292	10.6889	11.3204	10.3652	2.08107	5.34e-15	8.54e-14	>LE01Gene00395	KT3K_MOUSE^KT3K_MOUSE^Q:79-861,H:28-304^35.8%ID^E:4.2e-32^RecName: Full=Ketosamine-3-kinase	PF01636.22^APH^Phosphotransferase enzyme family^30-228^E:1.4e-05`PF03881.13^Fructosamin_kin^Fructosamine kinase^33-290^E:6.8e-59	COG3001^Fructosamine	KEGG:mmu:238024`KO:K15523	GO:0016301^molecular_function^kinase activity	.
>LE01Gene11658	7.81532	7.87752	7.86427	9.92385	10.0088	9.83946	2.0779	4.09e-18	1.01e-16	>LE01Gene11658	SRR1L_HUMAN^SRR1L_HUMAN^Q:681-1196,H:143-307^29.7%ID^E:3.2e-14^RecName: Full=SRR1-like protein	PF07985.11^SRR1^SRR1^85-114^E:7.3e-09	.	.	.	.
>LE01Gene13029	7.04494	6.35659	5.4046	8.11395	9.22696	7.61634	2.07734	0.000126349	0.000354997	>LE01Gene13029	NCEH1_HUMAN^NCEH1_HUMAN^Q:320-691,H:70-198^28.9%ID^E:9.3e-06^RecName: Full=Neutral cholesterol ester hydrolase 1	PF10340.8^Say1_Mug180^Steryl acetyl hydrolase^123-218^E:8.9e-09`PF07859.12^Abhydrolase_3^alpha/beta hydrolase fold^127-387^E:9.3e-16	.	.	.	GO:0016787^molecular_function^hydrolase activity
>LE01Gene08404	6.18655	5.70246	7.39621	8.32652	8.26832	9.22157	2.07597	1.48e-08	8.22e-08	>LE01Gene08404	.	.	.	.	.	.
>LE01Gene04315	8.07105	7.47824	6.09986	9.81566	10.0852	7.46431	2.07509	4.91e-05	0.000149574	>LE01Gene04315	.	.	.	.	.	.
>LE01Gene04061	7.10721	7.24153	7.84542	9.58201	9.5563	9.3618	2.07506	8.17e-10	5.55e-09	>LE01Gene04061	PRIA_LENED^PRIA_LENED^Q:535-789,H:180-256^41.2%ID^E:7.7e-12^RecName: Full=Protein priA	.	.	.	.	.
>LE01Gene08044	8.62615	7.79229	8.5243	11.3631	9.90936	9.08556	2.07464	0.000234286	0.000626926	>LE01Gene08044	CHI1_RHIOL^CHI1_RHIOL^Q:198-1136,H:19-316^47.3%ID^E:8.2e-69^RecName: Full=Chitinase 1	.	.	.	.	.
>LE01Gene03390	10.8003	10.5297	11.1912	12.5931	13.0775	13.0955	2.07448	7.34e-20	2.33e-18	>LE01Gene03390	BAT1_ORYSJ^BAT1_ORYSJ^Q:610-2031,H:31-514^30.3%ID^E:2e-52^RecName: Full=Amino-acid permease BAT1 homolog	.	.	.	.	.
>LE01Gene01870	7.63685	6.59096	7.60497	9.39616	9.36022	9.49787	2.0744	1.56e-11	1.38e-10	>LE01Gene01870	ZSWM7_DANRE^ZSWM7_DANRE^Q:60-437,H:3-124^37.7%ID^E:3.1e-11^RecName: Full=Zinc finger SWIM domain-containing protein 7	PF04434.16^SWIM^SWIM zinc finger^97-125^E:2.7e-05	.	.	.	GO:0008270^molecular_function^zinc ion binding
>LE01Gene05855	9.40223	8.60847	9.73708	11.4331	11.2693	11.473	2.07417	6.22e-12	5.87e-11	>LE01Gene05855	FLS_PETHY^FLS_PETHY^Q:673-1560,H:8-291^26.8%ID^E:7.2e-12^RecName: Full=Flavonol synthase/flavanone 3-hydroxylase	PF14226.5^DIOX_N^non-haem dioxygenase in morphine synthesis N-terminal^148-246^E:9.7e-14`PF03171.19^2OG-FeII_Oxy^2OG-Fe(II) oxygenase superfamily^316-402^E:7e-12	COG3491^2OGFe(II) oxygenase	KEGG:ath:AT3G49620	GO:0051213^molecular_function^dioxygenase activity`GO:0046872^molecular_function^metal ion binding	GO:0016491^molecular_function^oxidoreductase activity`GO:0055114^biological_process^oxidation-reduction process
>LE01Gene14459	7.37526	7.01306	7.32538	9.09909	9.27726	9.52846	2.07305	1.94e-17	4.31e-16	>LE01Gene14459	TDG_HUMAN^TDG_HUMAN^Q:394-972,H:124-301^37.6%ID^E:1.7e-26^RecName: Full=G/T mismatch-specific thymine DNA glycosylase	PF03167.18^UDG^Uracil DNA glycosylase superfamily^135-249^E:3e-15	COG3663^U mismatch-specific DNA glycosylase	KEGG:hsa:6996`KO:K20813	GO:0005654^cellular_component^nucleoplasm`GO:0005634^cellular_component^nucleus`GO:0005886^cellular_component^plasma membrane`GO:0016605^cellular_component^PML body`GO:0005524^molecular_function^ATP binding`GO:0031404^molecular_function^chloride ion binding`GO:0003684^molecular_function^damaged DNA binding`GO:0003677^molecular_function^DNA binding`GO:0019104^molecular_function^DNA N-glycosylase a…	.
>LE01Gene08387	10.2959	10.1536	10.6894	12.7943	12.2557	12.2938	2.07254	1.59e-13	1.97e-12	>LE01Gene08387	SYSC_SCHPO^SYSC_SCHPO^Q:7-1344,H:2-446^60.4%ID^E:7.1e-152^RecName: Full=Serine--tRNA ligase, cytoplasmic	PF02403.21^Seryl_tRNA_N^Seryl-tRNA synthetase N-terminal domain^11-113^E:2.2e-19`PF00587.24^tRNA-synt_2b^tRNA synthetase class II core domain (G, H, P, S and T)^228-413^E:2.7e-36	.	KEGG:spo:SPAC29A4.15`KO:K01875	GO:0005737^cellular_component^cytoplasm`GO:0005829^cellular_component^cytosol`GO:0005524^molecular_function^ATP binding`GO:0004828^molecular_function^serine-tRNA ligase activity`GO:0002181^biological_process^cytoplasmic translation`GO:0097056^biological_process^selenocysteinyl-tRNA(Sec) biosynthetic process`GO:0006434^biological_process^seryl-tRNA aminoacylation	GO:0000166^molecular_function^nucleotide binding`GO:0004812^molecular_function^aminoacyl-tRNA ligase activity`GO:0005524^molecular_function^ATP binding`GO:0006418^biological_process^tRNA aminoacylation for protein translation
>LE01Gene11373	7.44121	7.89515	7.78071	9.00763	10.0436	10.0718	2.07177	0.000171989	0.000470786	>LE01Gene11373	UPPS_THEAC^UPPS_THEAC^Q:1915-2514,H:3-206^30.3%ID^E:1.7e-20^RecName: Full=Tritrans,polycis-undecaprenyl-diphosphate synthase (geranylgeranyl-diphosphate specific) {ECO:0000255|HAMAP-Rule:MF_01139}	.	.	.	.	.
>LE01Gene04649	9.81984	11.059	10.6003	12.1282	13.4367	11.8601	2.07148	2.66e-05	8.51e-05	>LE01Gene04649	NPS10_HETAN^NPS10_HETAN^Q:15-3212,H:2-1083^45.4%ID^E:1.9e-275^RecName: Full=Adenylate-forming reductase Nps10	.	.	.	.	.
>LE01Gene05941	11.641	11.979	13.0133	14.5762	14.4284	14.1864	2.07123	5.24e-08	2.64e-07	>LE01Gene05941	.	.	.	.	.	.
>LE01Gene02183	11.2199	10.9095	11.5662	13.0225	13.191	13.6814	2.06981	6.76e-11	5.44e-10	>LE01Gene02183	PIA2_PLEOS^PIA2_PLEOS^Q:61-282,H:5-76^42.7%ID^E:3.1e-07^RecName: Full=Serine proteinase inhibitor IA-2	.	.	.	GO:0004867^molecular_function^serine-type endopeptidase inhibitor activity	.
>LE01Gene05891	6.02389	6.28708	5.98966	7.95982	8.83044	7.26558	2.06979	2.4e-08	1.28e-07	>LE01Gene05891	.	.	.	.	.	.
>LE01Gene08832	7.88807	7.65418	8.07323	10.1198	9.74685	9.94452	2.06808	4.76e-15	7.68e-14	>LE01Gene08832	RCBT1_HUMAN^RCBT1_HUMAN^Q:916-1194,H:94-174^35.5%ID^E:5.6e-05^RecName: Full=RCC1 and BTB domain-containing protein 1	PF00415.17^RCC1^Regulator of chromosome condensation (RCC1) repeat^212-263^E:3e-05`PF00415.17^RCC1^Regulator of chromosome condensation (RCC1) repeat^306-361^E:3.3e-07`PF00415.17^RCC1^Regulator of chromosome condensation (RCC1) repeat^372-407^E:0.00014	COG5184^regulator of chromosome condensation	KEGG:hsa:55213`KO:K11494	GO:0005737^cellular_component^cytoplasm`GO:0005634^cellular_component^nucleus`GO:0007049^biological_process^cell cycle`GO:0006325^biological_process^chromatin organization`GO:0006355^biological_process^regulation of transcription, DNA-templated`GO:0006351^biological_process^transcription, DNA-templated	.
>LE01Gene02673	4.20737	2.27934	3.91864	5.95006	5.70657	5.21537	2.06651	0.000447468	0.00113528	>LE01Gene02673	.	.	.	.	.	.
>LE01Gene10261	8.08143	8.53916	8.54002	10.4219	10.8134	10.0481	2.06248	6.41e-12	6.04e-11	>LE01Gene10261	.	.	.	.	.	.
>LE01Gene09762	6.54257	5.62005	5.50415	7.27109	8.25925	8.2945	2.06134	1.56e-07	7.3e-07	>LE01Gene09762	.	.	.	.	.	.
>LE01Gene07616	9.66284	9.44249	9.91645	11.9645	11.7313	11.5046	2.06024	4.45e-18	1.09e-16	>LE01Gene07616	UREG_SCHPO^UREG_SCHPO^Q:165-818,H:67-284^68.8%ID^E:4.1e-85^RecName: Full=Uncharacterized urease accessory protein ureG-like	PF02492.18^cobW^CobW/HypB/UreG, nucleotide-binding domain^77-242^E:8.9e-32	.	KEGG:spo:SPCPB16A4.05c`KO:K03189	GO:0005829^cellular_component^cytosol`GO:0005634^cellular_component^nucleus`GO:0005525^molecular_function^GTP binding`GO:0003924^molecular_function^GTPase activity`GO:0016151^molecular_function^nickel cation binding`GO:0019627^biological_process^urea metabolic process	.
>LE01Gene04966	10.2181	10.1658	10.7017	12.2535	12.7683	12.2279	2.05699	3.02e-13	3.56e-12	>LE01Gene04966	LGUL_BRAJU^LGUL_BRAJU^Q:82-540,H:19-171^50.3%ID^E:1e-38^RecName: Full=Lactoylglutathione lyase	PF00903.24^Glyoxalase^Glyoxalase/Bleomycin resistance protein/Dioxygenase superfamily^12-155^E:8.1e-24`PF13669.5^Glyoxalase_4^Glyoxalase/Bleomycin resistance protein/Dioxygenase superfamily^14-144^E:6.9e-08	.	.	GO:0004462^molecular_function^lactoylglutathione lyase activity`GO:0046872^molecular_function^metal ion binding`GO:0009651^biological_process^response to salt stress`GO:0009414^biological_process^response to water deprivation	.
>LE01Gene05002	5.48166	5.53266	5.26018	7.09467	7.4824	7.733	2.05477	8.56e-10	5.78e-09	>LE01Gene05002	.	.	.	.	.	.
>LE01Gene08726	8.4208	8.51276	8.443	10.3575	10.127	10.9248	2.05341	9.68e-10	6.46e-09	>LE01Gene08726	BCS1_HUMAN^BCS1_HUMAN^Q:366-1670,H:22-404^34.9%ID^E:5e-52^RecName: Full=Mitochondrial chaperone BCS1	.	.	.	.	.
>LE01Gene07124	9.31697	9.47607	9.06784	9.9784	11.8573	11.5955	2.05181	4.51e-08	2.29e-07	>LE01Gene07124	GGLO_SCYTO^GGLO_SCYTO^Q:166-1464,H:10-440^37.8%ID^E:3.8e-96^RecName: Full=L-gulonolactone oxidase	.	.	.	.	.
>LE01Gene05686	11.007	10.0964	10.4177	13.3696	12.2685	11.6387	2.0497	4.33e-05	0.000133296	>LE01Gene05686	CHIA1_BACCI^CHIA1_BACCI^Q:672-1961,H:133-464^23%ID^E:1.2e-20^RecName: Full=Chitinase A1	PF00787.23^PX^PX domain^30-131^E:1.7e-14`PF00704.27^Glyco_hydro_18^Glycosyl hydrolases family 18^186-606^E:8.1e-56	COG3325^chitinase	KEGG:hsa:1118`KO:K01183	GO:0005576^cellular_component^extracellular region`GO:0005615^cellular_component^extracellular space`GO:0005764^cellular_component^lysosome`GO:0035580^cellular_component^specific granule lumen`GO:1904724^cellular_component^tertiary granule lumen`GO:0008061^molecular_function^chitin binding`GO:0004568^molecular_function^chitinase activity`GO:0008843^molecular_function^endochitinase activity`GO:000…	GO:0035091^molecular_function^phosphatidylinositol binding`GO:0005975^biological_process^carbohydrate metabolic process
>LE01Gene12408	11.943	11.7357	11.7608	13.2109	14.0065	14.1996	2.04894	1.81e-21	7.02e-20	>LE01Gene12408	.	.	.	.	.	.
>LE01Gene04340	8.31923	8.0657	8.60126	10.2836	10.4102	10.4698	2.0484	9.54e-28	9.28e-26	>LE01Gene04340	.	.	.	.	.	.
>LE01Gene09408	3.28342	3.94996	2.332	4.23104	5.37818	5.80076	2.04816	0.00109082	0.00255977	>LE01Gene09408	.	.	.	.	.	.
>LE01Gene02213	6.60145	6.42291	6.26034	7.48964	9.00613	8.53041	2.04701	2.05e-09	1.29e-08	>LE01Gene02213	.	.	.	.	.	.
>LE01Gene13397	12.1107	11.9748	11.886	13.3531	14.3625	14.2011	2.04183	0.000126014	0.000354141	>LE01Gene13397	MFSD5_MOUSE^MFSD5_MOUSE^Q:820-1923,H:48-394^32.3%ID^E:5.5e-39^RecName: Full=Molybdate-anion transporter	PF11937.7^DUF3455^Protein of unknown function (DUF3455)^66-239^E:1e-20`PF05631.13^MFS_5^Sugar-tranasporters, 12 TM^264-546^E:2.6e-72`PF07690.15^MFS_1^Major Facilitator Superfamily^272-629^E:9.5e-18	ENOG410XSP5^Major Facilitator superfamily	.	GO:0016021^cellular_component^integral component of membrane`GO:0005886^cellular_component^plasma membrane`GO:0015098^molecular_function^molybdate ion transmembrane transporter activity	GO:0015098^molecular_function^molybdate ion transmembrane transporter activity`GO:0015689^biological_process^molybdate ion transport`GO:0016021^cellular_component^integral component of membrane`GO:0055085^biological_process^transmembrane transport
>LE01Gene06734	7.79655	6.9804	6.85796	9.54091	9.52636	8.71904	2.0418	8.97e-08	4.36e-07	>LE01Gene06734	Y1773_SYNY3^Y1773_SYNY3^Q:1692-2453,H:5-231^35.3%ID^E:1e-37^RecName: Full=Putative quercetin 2,3-dioxygenase sll1773	PF02678.15^Pirin^Pirin^14-121^E:1.9e-27	.	KEGG:syn:sll1773`KO:K06911	GO:0046872^molecular_function^metal ion binding`GO:0008127^molecular_function^quercetin 2,3-dioxygenase activity	.
>LE01Gene07894	8.90561	8.44656	9.1315	10.3493	11.662	10.1824	2.04079	9.97e-05	0.000286018	>LE01Gene07894	MTDH_FRAAN^MTDH_FRAAN^Q:260-1270,H:3-349^33.2%ID^E:1.9e-41^RecName: Full=Probable mannitol dehydrogenase	PF08240.11^ADH_N^Alcohol dehydrogenase GroES-like domain^38-139^E:2.4e-20`PF00107.25^ADH_zinc_N^Zinc-binding dehydrogenase^181-297^E:1.1e-08	.	.	GO:0046029^molecular_function^mannitol dehydrogenase activity`GO:0008270^molecular_function^zinc ion binding	GO:0055114^biological_process^oxidation-reduction process
>LE01Gene04613	9.34524	9.19695	9.06784	11.1336	11.7621	10.6051	2.03839	1.37e-10	1.05e-09	>LE01Gene04613	LIP_RHINI^LIP_RHINI^Q:638-1384,H:129-373^28.8%ID^E:1.2e-13^RecName: Full=Lipase	PF01764.24^Lipase_3^Lipase (class 3)^104-243^E:1.4e-23	.	.	.	GO:0006629^biological_process^lipid metabolic process
>LE01Gene12155	4.71365	3.41093	4.0118	6.09535	6.03895	6.21601	2.03831	9.14e-06	3.18e-05	>LE01Gene12155	YA03_SCHPO^YA03_SCHPO^Q:57-524,H:7-208^26.2%ID^E:1.5e-06^RecName: Full=Probable phosphatase SPAC5H10.03	PF00300.21^His_Phos_1^Histidine phosphatase superfamily (branch 1)^8-43^E:1.2e-05`PF00300.21^His_Phos_1^Histidine phosphatase superfamily (branch 1)^57-141^E:4.6e-06	.	.	.	.
>LE01Gene05130	7.52724	7.83554	7.78071	9.58552	10.5015	8.5142	2.03496	5.21e-07	2.24e-06	>LE01Gene05130	SOC1_ARATH^SOC1_ARATH^Q:473-697,H:24-93^38.7%ID^E:1.4e-07^RecName: Full=MADS-box protein SOC1	PF00319.17^SRF-TF^SRF-type transcription factor (DNA-binding and dimerisation domain)^71-97^E:4.9e-12	COG5068^Transcription factor	KEGG:ath:AT2G45660	GO:0005737^cellular_component^cytoplasm`GO:0005634^cellular_component^nucleus`GO:0003700^molecular_function^DNA-binding transcription factor activity`GO:0046983^molecular_function^protein dimerization activity`GO:0000977^molecular_function^RNA polymerase II regulatory region sequence-specific DNA binding`GO:0008134^molecular_function^transcription factor binding`GO:0030154^biological_process^cell…	GO:0003677^molecular_function^DNA binding`GO:0046983^molecular_function^protein dimerization activity
>LE01Gene07783	8.53847	8.36879	8.85804	10.7276	10.6232	10.5365	2.03156	3.5e-24	1.95e-22	>LE01Gene07783	.	.	.	.	.	.
>LE01Gene09322	6.57231	6.43902	5.14151	7.93245	8.26832	8.35036	2.03128	0.00216234	0.0047635	>LE01Gene09322	.	.	.	.	.	.
>LE01Gene07569	5.76529	6.71525	6.50429	8.01826	8.58387	8.53444	2.03123	9.16e-12	8.42e-11	>LE01Gene07569	ASAE_ASPFN^ASAE_ASPFN^Q:1062-2150,H:43-432^30.3%ID^E:4.6e-39^RecName: Full=MFS transporter asaE {ECO:0000303|PubMed:29674152}	PF07690.15^MFS_1^Major Facilitator Superfamily^184-307^E:2.9e-10`PF07690.15^MFS_1^Major Facilitator Superfamily^311-452^E:3e-08	.	.	GO:0016021^cellular_component^integral component of membrane`GO:0005886^cellular_component^plasma membrane`GO:0055085^biological_process^transmembrane transport	GO:0055085^biological_process^transmembrane transport`GO:0016021^cellular_component^integral component of membrane
>LE01Gene10989	11.283	11.1969	11.0356	12.944	13.4863	13.1259	2.02824	5.71e-20	1.84e-18	>LE01Gene10989	.	PF03795.13^YCII^YCII-related domain^67-151^E:1.1e-08	.	.	.	.
>LE01Gene13089	7.31497	7.55417	8.26993	9.79605	9.42453	10.0883	2.02809	4.92e-13	5.59e-12	>LE01Gene13089	.	.	.	.	.	.
>LE01Gene12537	10.2063	9.96481	10.2629	12.3639	12.0054	12.1335	2.02597	1.98e-19	5.96e-18	>LE01Gene12537	DCE_YEAST^DCE_YEAST^Q:163-1476,H:49-514^50%ID^E:1.3e-124^RecName: Full=Glutamate decarboxylase	PF00282.18^Pyridoxal_deC^Pyridoxal-dependent decarboxylase conserved domain^67-380^E:5.7e-66	.	KEGG:sce:YMR250W`KO:K01580	GO:0004351^molecular_function^glutamate decarboxylase activity`GO:0030170^molecular_function^pyridoxal phosphate binding`GO:0034599^biological_process^cellular response to oxidative stress`GO:0006538^biological_process^glutamate catabolic process	GO:0016831^molecular_function^carboxy-lyase activity`GO:0030170^molecular_function^pyridoxal phosphate binding`GO:0019752^biological_process^carboxylic acid metabolic process
>LE01Gene11338	13.4042	12.7814	14.0114	15.7036	15.6081	15.1652	2.0258	1.2e-08	6.76e-08	>LE01Gene11338	DIOX4_ARATH^DIOX4_ARATH^Q:897-1616,H:66-329^28.4%ID^E:2.1e-13^RecName: Full=Probable 2-oxoglutarate-dependent dioxygenase ANS {ECO:0000305}	PF14226.5^DIOX_N^non-haem dioxygenase in morphine synthesis N-terminal^59-161^E:1.4e-17`PF03171.19^2OG-FeII_Oxy^2OG-Fe(II) oxygenase superfamily^189-287^E:3.1e-14	COG3491^2OGFe(II) oxygenase	KEGG:ath:AT2G38240	GO:0005829^cellular_component^cytosol`GO:0051213^molecular_function^dioxygenase activity`GO:0120091^molecular_function^jasmonic acid hydrolase`GO:0046872^molecular_function^metal ion binding`GO:0009813^biological_process^flavonoid biosynthetic process`GO:2000022^biological_process^regulation of jasmonic acid mediated signaling pathway	GO:0016491^molecular_function^oxidoreductase activity`GO:0055114^biological_process^oxidation-reduction process
>LE01Gene05144	11.6706	11.6544	11.8086	12.5848	13.953	14.2105	2.02444	8.44e-07	3.52e-06	>LE01Gene05144	HXNP_EMENI^HXNP_EMENI^Q:144-1508,H:34-484^32.8%ID^E:2.4e-62^RecName: Full=Major facilitator-type transporter hxnP	PF07690.15^MFS_1^Major Facilitator Superfamily^66-437^E:1e-28	.	.	GO:0016021^cellular_component^integral component of membrane`GO:0005886^cellular_component^plasma membrane`GO:0055085^biological_process^transmembrane transport	GO:0055085^biological_process^transmembrane transport`GO:0016021^cellular_component^integral component of membrane
>LE01Gene01584	12.3106	12.0671	12.4971	14.4788	14.2694	14.2092	2.02176	2e-19	6e-18	>LE01Gene01584	TCTP_CRYNB^TCTP_CRYNB^Q:94-597,H:1-167^76.2%ID^E:9.9e-70^RecName: Full=Translationally-controlled tumor protein homolog	PF00838.16^TCTP^Translationally controlled tumour protein^1-164^E:4.1e-73	ENOG4111FVP^tumor protein	KEGG:cnb:CNBM1320	GO:0005737^cellular_component^cytoplasm`GO:0005874^cellular_component^microtubule`GO:0006412^biological_process^translation	.
>LE01Gene03058	9.60287	9.26406	9.3767	11.768	11.3728	11.0959	2.01898	2.93e-14	4.14e-13	>LE01Gene03058	RPE_ASHGO^RPE_ASHGO^Q:57-761,H:1-225^49%ID^E:1.8e-60^RecName: Full=Ribulose-phosphate 3-epimerase	PF00834.18^Ribul_P_3_epim^Ribulose-phosphate 3 epimerase family^24-208^E:6.5e-56	.	KEGG:ago:AGOS_AFL208C`KO:K01783	GO:0005829^cellular_component^cytosol`GO:0046872^molecular_function^metal ion binding`GO:0004750^molecular_function^ribulose-phosphate 3-epimerase activity`GO:0044262^biological_process^cellular carbohydrate metabolic process`GO:0019323^biological_process^pentose catabolic process`GO:0009052^biological_process^pentose-phosphate shunt, non-oxidative branch	GO:0016857^molecular_function^racemase and epimerase activity, acting on carbohydrates and derivatives`GO:0005975^biological_process^carbohydrate metabolic process
>LE01Gene04499	7.11733	7.91832	6.67067	8.58036	10.1431	8.75397	2.01744	6.58e-06	2.35e-05	>LE01Gene04499	STCC_EMENI^STCC_EMENI^Q:261-839,H:36-231^32.3%ID^E:1.6e-15^RecName: Full=Putative sterigmatocystin biosynthesis peroxidase stcC	PF01328.16^Peroxidase_2^Peroxidase, family 2^53-149^E:5.7e-12	.	KEGG:ani:AN7823.2	GO:0046872^molecular_function^metal ion binding`GO:0004601^molecular_function^peroxidase activity`GO:0045461^biological_process^sterigmatocystin biosynthetic process	GO:0004601^molecular_function^peroxidase activity
>LE01Gene11875	5.57275	6.33953	5.50415	7.14323	8.2177	8.00074	2.01576	5.3e-10	3.72e-09	>LE01Gene11875	NHG2_PSEPU^NHG2_PSEPU^Q:1025-2338,H:11-418^32.6%ID^E:2.7e-56^RecName: Full=Salicylate hydroxylase	PF01494.18^FAD_binding_3^FAD binding domain^18-397^E:4.9e-18	.	.	GO:0071949^molecular_function^FAD binding`GO:0018658^molecular_function^salicylate 1-monooxygenase activity`GO:0019439^biological_process^aromatic compound catabolic process	GO:0071949^molecular_function^FAD binding
>LE01Gene00492	10.3037	10.5031	10.4934	12.1765	12.7313	12.3907	2.01566	5.4e-22	2.26e-20	>LE01Gene00492	SKN1_CANAX^SKN1_CANAX^Q:922-2463,H:246-736^41%ID^E:3.2e-103^RecName: Full=Beta-glucan synthesis-associated protein SKN1	.	.	.	.	.
>LE01Gene09824	5.20623	4.75586	5.05659	6.81188	7.28198	6.85367	2.01498	6.7e-11	5.39e-10	>LE01Gene09824	.	.	.	.	.	.
>LE01Gene04965	7.86423	7.63333	8.19245	9.33685	10.6161	9.4518	2.01471	2.27e-07	1.04e-06	>LE01Gene04965	.	.	.	.	.	.
>LE01Gene08062	8.31484	8.86255	8.85804	10.8915	11.1081	9.85403	2.01447	1.14e-07	5.48e-07	>LE01Gene08062	PDT1_SCHPO^PDT1_SCHPO^Q:169-1518,H:73-468^38.6%ID^E:1.1e-67^RecName: Full=Manganese transporter pdt1	PF01566.17^Nramp^Natural resistance-associated macrophage protein^47-256^E:2e-47`PF01566.17^Nramp^Natural resistance-associated macrophage protein^317-477^E:6.5e-36	.	KEGG:spo:SPAC27F1.08`KO:K12346	GO:0005783^cellular_component^endoplasmic reticulum`GO:0030176^cellular_component^integral component of endoplasmic reticulum membrane`GO:0005384^molecular_function^manganese ion transmembrane transporter activity`GO:0046872^molecular_function^metal ion binding`GO:0030026^biological_process^cellular manganese ion homeostasis`GO:0071421^biological_process^manganese ion transmembrane transport	GO:0046873^molecular_function^metal ion transmembrane transporter activity`GO:0030001^biological_process^metal ion transport`GO:0016020^cellular_component^membrane
>LE01Gene12136	6.41708	6.01346	6.07848	7.49714	7.77752	8.87317	2.01122	3.87e-09	2.36e-08	>LE01Gene12136	PDC_ASPTN^PDC_ASPTN^Q:441-2132,H:14-558^43.9%ID^E:3.9e-126^RecName: Full=Pyruvate decarboxylase	PF02776.17^TPP_enzyme_N^Thiamine pyrophosphate enzyme, N-terminal TPP binding domain^26-197^E:2.1e-33`PF00205.21^TPP_enzyme_M^Thiamine pyrophosphate enzyme, central domain^225-343^E:1.3e-18`PF02775.20^TPP_enzyme_C^Thiamine pyrophosphate enzyme, C-terminal TPP binding domain^446-542^E:1.1e-11	COG3961^Pyruvate decarboxylase	KEGG:cgr:CAGL0M07920g`KO:K01568	GO:0005829^cellular_component^cytosol`GO:0000287^molecular_function^magnesium ion binding`GO:0004737^molecular_function^pyruvate decarboxylase activity`GO:0030976^molecular_function^thiamine pyrophosphate binding`GO:0006090^biological_process^pyruvate metabolic process	GO:0030976^molecular_function^thiamine pyrophosphate binding`GO:0000287^molecular_function^magnesium ion binding`GO:0003824^molecular_function^catalytic activity
>LE01Gene11399	7.17661	8.37299	9.66002	10.9622	10.8696	10.3493	2.01107	0.000345177	0.000895972	>LE01Gene11399	.	.	.	.	.	.
>LE01Gene13510	10.1006	10.1475	10.6761	12.4023	12.2414	12.3785	2.0108	2.4e-13	2.89e-12	>LE01Gene13510	PYRE_ACIAD^PYRE_ACIAD^Q:170-853,H:13-216^46.5%ID^E:1.9e-45^RecName: Full=Orotate phosphoribosyltransferase {ECO:0000255|HAMAP-Rule:MF_01208}	PF00156.26^Pribosyltran^Phosphoribosyl transferase domain^88-192^E:4.9e-14	COG0461^orotate phosphoribosyltransferase activity	KEGG:aci:ACIAD3525`KO:K00762	GO:0004588^molecular_function^orotate phosphoribosyltransferase activity`GO:0044205^biological_process^'de novo' UMP biosynthetic process	GO:0009116^biological_process^nucleoside metabolic process
>LE01Gene11605	11.7944	11.4009	12.3477	14.1965	13.8596	13.6169	2.01067	1.01e-12	1.09e-11	>LE01Gene11605	.	.	.	.	.	.
>LE01Gene03031	7.28834	7.32193	7.43036	9.49301	9.37289	9.16818	2.00984	2.44e-21	9.36e-20	>LE01Gene03031	.	.	.	.	.	.
>LE01Gene12832	9.44304	9.52406	9.62911	12.0081	11.2064	11.2653	2.00913	3.5e-12	3.44e-11	>LE01Gene12832	TRP_COPC7^TRP_COPC7^Q:48-2201,H:1-698^75.8%ID^E:0^RecName: Full=Tryptophan synthase	PF00290.19^Trp_syntA^Tryptophan synthase alpha chain^23-267^E:5.5e-83`PF00291.24^PALP^Pyridoxal-phosphate dependent enzyme^367-662^E:1.5e-42	COG0133^The beta subunit is responsible for the synthesis of L- tryptophan from indole and L-serine (By similarity)`COG0159^The alpha subunit is responsible for the aldol cleavage of indoleglycerol phosphate to indole and glyceraldehyde 3- phosphate (By similarity)	KEGG:cci:CC1G_13871`KO:K01694	GO:0004834^molecular_function^tryptophan synthase activity	GO:0004834^molecular_function^tryptophan synthase activity`GO:0006568^biological_process^tryptophan metabolic process
>LE01Gene05177	7.48877	8.18036	7.87051	9.43763	10.2783	9.78814	2.00692	7.07e-07	2.98e-06	>LE01Gene05177	LAAA_PSEAZ^LAAA_PSEAZ^Q:105-977,H:1-286^37.9%ID^E:1.7e-45^RecName: Full=L-amino acid amidase {ECO:0000303|PubMed:15066172}	.	.	.	.	.
>LE01Gene09039	8.31484	7.46256	7.91942	10.857	9.31715	8.84104	2.00642	8.54e-07	3.56e-06	>LE01Gene09039	.	.	.	.	.	.
>LE01Gene07974	10.3623	10.3346	10.7956	12.2239	12.5087	12.7706	2.00558	2.48e-17	5.34e-16	>LE01Gene07974	ARS_PSEAE^ARS_PSEAE^Q:56-1699,H:2-530^56.2%ID^E:4.1e-183^RecName: Full=Arylsulfatase	PF00884.22^Sulfatase^Sulfatase^22-448^E:1.5e-79	COG3119^Sulfatase	KEGG:pae:PA0183`KO:K01130	GO:0005737^cellular_component^cytoplasm`GO:0004065^molecular_function^arylsulfatase activity`GO:0046872^molecular_function^metal ion binding`GO:0008081^molecular_function^phosphoric diester hydrolase activity`GO:0008152^biological_process^metabolic process	GO:0008484^molecular_function^sulfuric ester hydrolase activity
>LE01Gene08512	11.438	10.9253	11.6264	13.3044	13.3666	13.4125	2.00319	6.25e-15	9.87e-14	>LE01Gene08512	.	.	.	.	.	.
>LE01Gene14224	6.49678	7.17574	6.07848	8.56262	9.29956	7.60872	2.00284	3.21e-06	1.22e-05	>LE01Gene14224	.	PF10503.8^Esterase_phd^Esterase PHB depolymerase^40-151^E:4.4e-08	.	.	.	GO:0016787^molecular_function^hydrolase activity`GO:0005576^cellular_component^extracellular region
>LE01Gene04959	7.57209	7.81098	7.67073	9.59951	9.81654	9.62975	2.00245	1.79e-12	1.85e-11	>LE01Gene04959	.	PF14441.5^OTT_1508_deam^OTT_1508-like deaminase^337-397^E:8.5e-18	.	.	.	.
>LE01Gene11601	7.75825	8.93251	7.58994	10.3769	10.5765	9.51427	2.00223	7.95e-08	3.89e-07	>LE01Gene11601	.	.	.	.	.	.
>LE01Gene04138	7.32374	6.82967	7.31628	9.60299	9.20822	8.47286	2.00066	2.35e-08	1.26e-07	>LE01Gene04138	.	.	.	.	.	.
>LE01Gene00253	6.6158	6.40661	6.52024	8.58036	8.68896	8.19631	1.99883	8.74e-06	3.05e-05	>LE01Gene00253	.	.	.	.	.	.
>LE01Gene08422	4.60275	4.70346	4.25985	5.73879	6.96237	6.50563	1.99851	0.000242614	0.000646768	>LE01Gene08422	.	.	.	.	.	.
>LE01Gene05565	6.20565	6.05588	6.76735	8.38826	8.19884	8.48122	1.99809	5.73e-09	3.39e-08	>LE01Gene05565	.	.	.	.	.	.
>LE01Gene10200	5.6859	6.56183	7.07858	8.38422	8.8963	8.23144	1.99536	1.05e-07	5.07e-07	>LE01Gene10200	.	.	.	.	.	.
>LE01Gene12338	8.54972	8.3938	8.43881	10.5846	10.6581	10.0467	1.99528	1.57e-13	1.94e-12	>LE01Gene12338	WRP73_HUMAN^WRP73_HUMAN^Q:81-713,H:1-184^34.6%ID^E:3.1e-27^RecName: Full=WD repeat-containing protein WRAP73	.	.	.	.	.
>LE01Gene03195	6.10751	5.70246	7.49633	8.85565	8.15549	8.78471	1.99188	1.8e-07	8.37e-07	>LE01Gene03195	DPH7_DICDI^DPH7_DICDI^Q:261-1058,H:102-365^40.4%ID^E:4.5e-48^RecName: Full=Diphthine methyltransferase homolog	.	ENOG4111MMJ^WD repeat domain 85	KEGG:ddi:DDB_G0270178`KO:K17868	GO:0061685^molecular_function^diphthine methylesterase activity`GO:0017183^biological_process^peptidyl-diphthamide biosynthetic process from peptidyl-histidine	.
>LE01Gene12737	8.51186	7.46256	8.14182	9.91269	10.5655	9.62031	1.99127	3.53e-07	1.56e-06	>LE01Gene12737	PRLL_FUNXX^PRLL_FUNXX^Q:166-1176,H:12-343^30.5%ID^E:2.2e-40^RecName: Full=MFS transporter prlL {ECO:0000303|PubMed:25226362}	.	.	.	.	.
>LE01Gene07413	8.74189	8.75726	9.01537	11.0244	11.0541	10.2946	1.9899	3.64e-11	3.06e-10	>LE01Gene07413	.	.	.	.	.	.
>LE01Gene06854	7.73871	7.26883	7.64914	9.40016	9.52257	9.71023	1.98956	1.56e-12	1.63e-11	>LE01Gene06854	.	PF09811.8^Yae1_N^Essential protein Yae1, N terminal^21-59^E:1.4e-10	.	.	.	.
>LE01Gene06422	7.63685	7.05548	7.27929	8.98916	9.77894	9.07178	1.98829	4.83e-18	1.18e-16	>LE01Gene06422	TP_PLEBE^TP_PLEBE^Q:297-1709,H:55-511^37.8%ID^E:2.2e-83^RecName: Full=Aspyridones efflux protein {ECO:0000303|PubMed:14745177}	PF07690.15^MFS_1^Major Facilitator Superfamily^57-460^E:8.3e-39	.	.	GO:0016021^cellular_component^integral component of membrane`GO:0005886^cellular_component^plasma membrane`GO:0055085^biological_process^transmembrane transport	GO:0055085^biological_process^transmembrane transport`GO:0016021^cellular_component^integral component of membrane
>LE01Gene06812	9.9586	10.5914	10.5575	11.7299	12.5409	12.7043	1.98733	5.19e-07	2.23e-06	>LE01Gene06812	YN22_SCHPO^YN22_SCHPO^Q:181-1533,H:92-541^29.8%ID^E:1.6e-50^RecName: Full=Uncharacterized transporter C530.02	PF07690.15^MFS_1^Major Facilitator Superfamily^75-447^E:5.4e-25	.	KEGG:spo:SPBC530.02	GO:0016021^cellular_component^integral component of membrane`GO:0005886^cellular_component^plasma membrane`GO:0022857^molecular_function^transmembrane transporter activity`GO:0055085^biological_process^transmembrane transport	GO:0055085^biological_process^transmembrane transport`GO:0016021^cellular_component^integral component of membrane
>LE01Gene04012	6.29754	5.90164	6.09986	7.94893	8.32594	7.92305	1.98523	5.09e-11	4.18e-10	>LE01Gene04012	.	.	.	.	.	.
>LE01Gene07756	9.94872	9.04469	8.95213	11.2792	11.5737	11.2359	1.98326	1.5e-12	1.57e-11	>LE01Gene07756	.	.	.	.	.	.
>LE01Gene10258	8.38773	9.25043	9.47609	10.8423	11.3447	11.0368	1.98302	2.33e-12	2.36e-11	>LE01Gene10258	.	PF07287.10^AtuA^Acyclic terpene utilisation family protein AtuA^13-391^E:4.9e-115	.	.	.	.
>LE01Gene05292	9.96001	9.73289	10.2498	12.2306	11.649	11.9947	1.98225	6.26e-14	8.36e-13	>LE01Gene05292	FUMH_RHIOR^FUMH_RHIOR^Q:207-1586,H:31-490^80%ID^E:6.7e-216^RecName: Full=Fumarate hydratase, mitochondrial	PF00206.19^Lyase_1^Lyase^1-239^E:1.6e-95`PF10415.8^FumaraseC_C^Fumarase C C-terminus^305-357^E:2.3e-19	.	.	GO:0005739^cellular_component^mitochondrion`GO:0045239^cellular_component^tricarboxylic acid cycle enzyme complex`GO:0004333^molecular_function^fumarate hydratase activity`GO:0006106^biological_process^fumarate metabolic process`GO:0006099^biological_process^tricarboxylic acid cycle	GO:0016829^molecular_function^lyase activity`GO:0006099^biological_process^tricarboxylic acid cycle
>LE01Gene04245	15.6619	15.6405	15.778	17.3606	17.6877	17.9255	1.98159	1.17e-07	5.58e-07	>LE01Gene04245	CATA_CANAL^CATA_CANAL^Q:63-1511,H:4-478^57.1%ID^E:1.7e-158^RecName: Full=Peroxisomal catalase	PF00199.18^Catalase^Catalase^23-401^E:4.8e-185`PF06628.11^Catalase-rel^Catalase-related immune-responsive^444-503^E:2.4e-15	.	KEGG:cal:CAALFM_C106810WA`KO:K03781	GO:0009277^cellular_component^fungal-type cell wall`GO:0005777^cellular_component^peroxisome`GO:0004096^molecular_function^catalase activity`GO:0020037^molecular_function^heme binding`GO:0046872^molecular_function^metal ion binding`GO:0070301^biological_process^cellular response to hydrogen peroxide`GO:0009267^biological_process^cellular response to starvation`GO:0030447^biological_process^filame…	GO:0004096^molecular_function^catalase activity`GO:0020037^molecular_function^heme binding`GO:0055114^biological_process^oxidation-reduction process
>LE01Gene01199	9.35168	9.8262	9.71647	11.6645	11.9126	11.2147	1.98149	8.82e-11	6.99e-10	>LE01Gene01199	T3HPD_MOUSE^T3HPD_MOUSE^Q:104-1243,H:23-354^39.8%ID^E:1.5e-59^RecName: Full=Trans-L-3-hydroxyproline dehydratase	PF05544.10^Pro_racemase^Proline racemase^35-397^E:6.3e-59	COG3938^Proline racemase	KEGG:mmu:67217`KO:K18384	GO:0016836^molecular_function^hydro-lyase activity`GO:0050346^molecular_function^trans-L-3-hydroxyproline dehydratase activity	.
>LE01Gene05795	9.94304	10.4213	10.0238	12.102	12.466	11.6987	1.97857	1.46e-12	1.54e-11	>LE01Gene05795	LYS_CHASP^LYS_CHASP^Q:2340-2218,H:136-177^57.1%ID^E:3.9e-07^RecName: Full=N,O-diacetylmuramidase	.	.	.	.	.
>LE01Gene12779	3.66094	3.27392	2.59545	5.29884	5.08147	4.90312	1.97856	3.2e-05	0.000101029	>LE01Gene12779	.	.	.	.	.	.
>LE01Gene00642	6.46543	6.40661	6.56704	8.37612	8.25469	8.67597	1.97744	5.98e-11	4.84e-10	>LE01Gene00642	ASPR1_PHARH^ASPR1_PHARH^Q:220-519,H:100-210^34.5%ID^E:9.2e-07^RecName: Full=Aspartic protease {ECO:0000303|PubMed:10091328, ECO:0000312|EMBL:AAC17105.1}	PF00026.22^Asp^Eukaryotic aspartyl protease^71-172^E:2.4e-09`PF00026.22^Asp^Eukaryotic aspartyl protease^364-515^E:2.6e-07	.	.	GO:0005576^cellular_component^extracellular region`GO:0004190^molecular_function^aspartic-type endopeptidase activity	.
>LE01Gene03297	12.479	11.7106	11.9744	13.7585	14.2618	14.1368	1.97739	2.04e-08	1.1e-07	>LE01Gene03297	EGT2_NEUCR^EGT2_NEUCR^Q:125-1348,H:23-464^30.3%ID^E:2.1e-53^RecName: Full=Hercynylcysteine sulfoxide lyase {ECO:0000305|PubMed:25275953}	PF00266.18^Aminotran_5^Aminotransferase class-V^104-380^E:4.9e-20	.	.	GO:0016829^molecular_function^lyase activity`GO:0009820^biological_process^alkaloid metabolic process	.
>LE01Gene07848	4.04717	2.76167	2.81814	4.1573	5.41132	5.6605	1.97588	0.000851877	0.0020484	>LE01Gene07848	.	.	.	.	.	.
>LE01Gene11813	5.79081	3.12252	4.5356	7.38046	5.92883	6.73278	1.97367	6.34e-05	0.000189345	>LE01Gene11813	.	.	.	.	.	.
>LE01Gene06917	7.62979	6.54704	7.59748	9.25083	9.45067	9.19639	1.97312	8.08e-12	7.5e-11	>LE01Gene06917	.	.	.	.	.	.
>LE01Gene10766	8.88206	8.58332	8.79063	10.7754	10.7403	10.6614	1.9717	4.97e-19	1.41e-17	>LE01Gene10766	MACD1_RAT^MACD1_RAT^Q:153-716,H:69-256^50.8%ID^E:2.1e-50^RecName: Full=O-acetyl-ADP-ribose deacetylase MACROD1	PF01661.20^Macro^Macro domain^82-195^E:1.3e-38	.	KEGG:rno:246233	GO:0005634^cellular_component^nucleus`GO:0016798^molecular_function^hydrolase activity, acting on glycosyl bonds`GO:0006974^biological_process^cellular response to DNA damage stimulus`GO:0051725^biological_process^protein de-ADP-ribosylation	.
>LE01Gene05330	10.0993	10.0127	10.306	12.4816	11.8033	11.9689	1.97075	1.53e-14	2.25e-13	>LE01Gene05330	PUR9_SCHPO^PUR9_SCHPO^Q:109-1893,H:3-585^65.4%ID^E:8.7e-223^RecName: Full=Bifunctional purine biosynthesis protein ade10	PF02142.21^MGS^MGS-like domain^47-160^E:4.4e-24`PF01808.17^AICARFT_IMPCHas^AICARFT/IMPCHase bienzyme^165-499^E:1.6e-87	.	KEGG:spo:SPCPB16A4.03c`KO:K00602	GO:0005829^cellular_component^cytosol`GO:0003937^molecular_function^IMP cyclohydrolase activity`GO:0004643^molecular_function^phosphoribosylaminoimidazolecarboxamide formyltransferase activity`GO:0006189^biological_process^'de novo' IMP biosynthetic process`GO:0006188^biological_process^IMP biosynthetic process	GO:0003937^molecular_function^IMP cyclohydrolase activity`GO:0004643^molecular_function^phosphoribosylaminoimidazolecarboxamide formyltransferase activity`GO:0006164^biological_process^purine nucleotide biosynthetic process
>LE01Gene06951	8.31043	8.58694	8.53218	10.3126	10.7395	10.2353	1.96835	9.56e-14	1.24e-12	>LE01Gene06951	.	.	.	.	.	.
>LE01Gene04218	8.15206	7.92406	8.32088	9.85991	10.3269	10.0924	1.96824	1.4e-15	2.43e-14	>LE01Gene04218	END4_PARD8^END4_PARD8^Q:334-1176,H:4-275^53%ID^E:2.3e-78^RecName: Full=Probable endonuclease 4 {ECO:0000255|HAMAP-Rule:MF_00152}	PF01261.23^AP_endonuc_2^Xylose isomerase-like TIM barrel^109-329^E:1.3e-28	COG0648^Endonuclease IV plays a role in DNA repair. It cleaves phosphodiester bonds at apurinic or apyrimidinic sites (AP sites) to produce new 5'-ends that are base-free deoxyribose 5-phosphate residues. It preferentially attacks modified AP sites created by bleomycin and neocarzinostatin (By similarity)	KEGG:pdi:BDI_1200`KO:K01151	GO:0008833^molecular_function^deoxyribonuclease IV (phage-T4-induced) activity`GO:0003677^molecular_function^DNA binding`GO:0008270^molecular_function^zinc ion binding`GO:0006281^biological_process^DNA repair	.
>LE01Gene07387	7.09701	6.76722	7.71296	9.03105	9.4123	9.1473	1.9668	9.03e-10	6.06e-09	>LE01Gene07387	.	.	.	.	.	.
>LE01Gene04863	5.98019	5.64805	6.47187	7.81147	8.27734	7.93527	1.96578	2.1e-11	1.82e-10	>LE01Gene04863	.	.	.	.	.	.
>LE01Gene11573	5.35051	4.80642	5.05659	7.20857	7.24569	6.48914	1.96541	1.02e-08	5.82e-08	>LE01Gene11573	.	.	.	.	.	.
>LE01Gene04938	9.04204	9.32385	9.24378	11.029	11.0632	11.3882	1.96311	2.99e-26	2.24e-24	>LE01Gene04938	KRE6_YEAST^KRE6_YEAST^Q:285-1847,H:211-711^40.4%ID^E:5.3e-100^RecName: Full=Beta-glucan synthesis-associated protein KRE6	.	.	.	.	.
>LE01Gene10262	7.51963	7.62631	8.02376	9.36579	10.4724	8.66866	1.96075	2.35e-05	7.61e-05	>LE01Gene10262	.	.	.	.	.	.
>LE01Gene00851	6.1672	7.07623	7.63457	7.612	9.64081	9.16818	1.96032	0.000850007	0.00204558	>LE01Gene00851	YE31_SCHPO^YE31_SCHPO^Q:203-1012,H:13-251^44.8%ID^E:2.7e-54^RecName: Full=ABC transporter domain-containing protein C20G4.01	PF00005.26^ABC_tran^ABC transporter^33-169^E:5.2e-19	.	KEGG:spo:SPAC20G4.01`KO:K12608	GO:0030015^cellular_component^CCR4-NOT core complex`GO:0005829^cellular_component^cytosol`GO:0005634^cellular_component^nucleus`GO:0005524^molecular_function^ATP binding`GO:0016887^molecular_function^ATPase activity`GO:0000289^biological_process^nuclear-transcribed mRNA poly(A) tail shortening`GO:0006368^biological_process^transcription elongation from RNA polymerase II promoter`GO:0006367^biolog…	GO:0005524^molecular_function^ATP binding`GO:0016887^molecular_function^ATPase activity
>LE01Gene09211	9.06576	8.90087	9.5322	11.0341	11.4541	10.8977	1.95885	1.95e-10	1.45e-09	>LE01Gene09211	YJCD_SCHPO^YJCD_SCHPO^Q:69-1049,H:31-332^34.3%ID^E:6.3e-34^RecName: Full=Uncharacterized oxidoreductase C736.13	PF00106.24^adh_short^short chain dehydrogenase^20-169^E:4.1e-20`PF08659.9^KR^KR domain^23-118^E:1.6e-06`PF13561.5^adh_short_C2^Enoyl-(Acyl carrier protein) reductase^29-173^E:2.4e-11	.	KEGG:spo:SPCC736.13	GO:0016491^molecular_function^oxidoreductase activity	.
>LE01Gene06049	7.27935	6.94699	7.13143	9.02328	9.14066	9.05786	1.95692	9.81e-19	2.65e-17	>LE01Gene06049	VRTI_PENAE^VRTI_PENAE^Q:663-1469,H:79-345^30.3%ID^E:5e-21^RecName: Full=Oxidoreductase vrtI {ECO:0000303|PubMed:20534346}	.	.	.	.	.
>LE01Gene14344	7.60842	7.66792	7.71988	8.90154	9.92808	9.81816	1.95566	8.51e-10	5.75e-09	>LE01Gene14344	ADRL_SCHPO^ADRL_SCHPO^Q:312-1136,H:49-321^37.3%ID^E:7.4e-48^RecName: Full=ADIPOR-like receptor SPBC12C2.09c	PF03006.19^HlyIII^Haemolysin-III related^62-283^E:1.2e-49	.	KEGG:spo:SPBC12C2.09c`KO:K07297	GO:0016021^cellular_component^integral component of membrane`GO:0005886^cellular_component^plasma membrane`GO:0046872^molecular_function^metal ion binding`GO:0006882^biological_process^cellular zinc ion homeostasis`GO:0006631^biological_process^fatty acid metabolic process	GO:0016021^cellular_component^integral component of membrane
>LE01Gene12503	9.25872	9.15123	9.35241	10.6848	11.5521	11.2604	1.95433	1.24e-08	7e-08	>LE01Gene12503	.	.	.	.	.	.
>LE01Gene01402	9.60287	9.09386	9.36129	11.1954	11.6009	11.1101	1.95257	2.04e-16	3.96e-15	>LE01Gene01402	.	.	.	.	.	.
>LE01Gene02419	11.189	10.8015	10.8439	12.6951	13.4027	12.446	1.95204	5.86e-14	7.87e-13	>LE01Gene02419	FUCT1_BOVIN^FUCT1_BOVIN^Q:199-1149,H:32-344^30.3%ID^E:1.7e-23^RecName: Full=GDP-fucose transporter 1	.	.	.	.	.
>LE01Gene13132	9.96001	9.60484	9.89979	12.1378	11.4919	11.6166	1.94835	4.28e-14	5.89e-13	>LE01Gene13132	PNPH_SCHPO^PNPH_SCHPO^Q:69-941,H:32-315^45.9%ID^E:2.8e-57^RecName: Full=Putative purine nucleoside phosphorylase	PF01048.19^PNP_UDP_1^Phosphorylase superfamily^29-268^E:1.5e-38	.	KEGG:sce:YLR209C`KO:K03783	GO:0005622^cellular_component^intracellular`GO:0047724^molecular_function^inosine nucleosidase activity`GO:0070635^molecular_function^nicotinamide riboside hydrolase activity`GO:0004731^molecular_function^purine-nucleoside phosphorylase activity`GO:0046115^biological_process^guanosine catabolic process`GO:0006148^biological_process^inosine catabolic process`GO:0034356^biological_process^NAD biosy…	GO:0003824^molecular_function^catalytic activity`GO:0009116^biological_process^nucleoside metabolic process
>LE01Gene07875	11.342	11.0466	11.4756	13.5631	12.9698	13.1406	1.94803	1.14e-11	1.04e-10	>LE01Gene07875	MMS2_SCHPO^MMS2_SCHPO^Q:204-617,H:1-138^63%ID^E:3.7e-51^RecName: Full=Ubiquitin-conjugating enzyme spm2	PF00179.25^UQ_con^Ubiquitin-conjugating enzyme^30-122^E:1.6e-15	.	KEGG:spo:SPCC338.05c`KO:K10704	GO:0005737^cellular_component^cytoplasm`GO:0005829^cellular_component^cytosol`GO:0005634^cellular_component^nucleus`GO:0016874^molecular_function^ligase activity`GO:0061631^molecular_function^ubiquitin conjugating enzyme activity`GO:0061630^molecular_function^ubiquitin protein ligase activity`GO:0031625^molecular_function^ubiquitin protein ligase binding`GO:0006301^biological_process^postreplicat…	.
>LE01Gene08194	7.74525	8.04479	7.55167	9.97438	9.96761	9.11542	1.94791	1.28e-13	1.61e-12	>LE01Gene08194	.	.	.	.	.	.
>LE01Gene09442	9.88646	9.70485	10.1483	11.6436	11.7745	12.1464	1.94729	9.71e-30	1.21e-27	>LE01Gene09442	.	.	.	.	.	.
>LE01Gene07031	11.5879	11.4233	11.7494	13.6175	13.3518	13.6256	1.94446	1.35e-30	1.88e-28	>LE01Gene07031	SCPE_ARTBC^SCPE_ARTBC^Q:364-1884,H:36-504^29.1%ID^E:8e-47^RecName: Full=Carboxypeptidase Y homolog ARB_06361 {ECO:0000305}	PF00450.21^Peptidase_S10^Serine carboxypeptidase^63-556^E:6.8e-67	COG2939^carboxy-peptidase	KEGG:pon:100171497`KO:K09645	GO:0004185^molecular_function^serine-type carboxypeptidase activity	GO:0004185^molecular_function^serine-type carboxypeptidase activity`GO:0006508^biological_process^proteolysis
>LE01Gene02397	10.948	11.0194	11.4113	13.6884	12.411	12.8426	1.94034	8.07e-08	3.95e-07	>LE01Gene02397	LYS9_SCHPO^LYS9_SCHPO^Q:973-2331,H:4-447^55.5%ID^E:1.2e-139^RecName: Full=Saccharopine dehydrogenase [NADP(+), L-glutamate-forming]	PF17284.1^Spermine_synt_N^Spermidine synthase tetramerisation domain^26-80^E:1.9e-24`PF01564.16^Spermine_synth^Spermine/spermidine synthase domain^83-261^E:1.2e-61`PF01488.19^Shikimate_DH^Shikimate / quinate 5-dehydrogenase^321-394^E:1.2e-06`PF03435.17^Sacchrp_dh_NADP^Saccharopine dehydrogenase NADP binding domain^325-440^E:6.8e-23`PF16653.4^Sacchrp_dh_C^Saccharopine dehydrogenase C-terminal doma…	.	KEGG:spo:SPBC3B8.03`KO:K00293	GO:0005737^cellular_component^cytoplasm`GO:0005829^cellular_component^cytosol`GO:0004755^molecular_function^saccharopine dehydrogenase (NADP+, L-glutamate-forming) activity`GO:0004753^molecular_function^saccharopine dehydrogenase activity`GO:0006091^biological_process^generation of precursor metabolites and energy`GO:0009085^biological_process^lysine biosynthetic process`GO:0019878^biological_pro…	GO:0016491^molecular_function^oxidoreductase activity`GO:0055114^biological_process^oxidation-reduction process
>LE01Gene01371	8.74516	8.66094	9.15211	11.4135	10.6855	9.96256	1.93975	1.4e-07	6.62e-07	>LE01Gene01371	FMPE_ASPFU^FMPE_ASPFU^Q:308-1603,H:1085-1473^32.8%ID^E:1.5e-43^RecName: Full=Nonribosomal peptide synthetase fmpE {ECO:0000303|PubMed:25582336}	PF00266.18^Aminotran_5^Aminotransferase class-V^21-433^E:1.3e-40	.	KEGG:afv:AFLA_095040	GO:0016740^molecular_function^transferase activity	.
>LE01Gene01605	10.4886	10.476	10.7413	12.474	12.3176	12.7169	1.9391	7.64e-19	2.1e-17	>LE01Gene01605	.	.	.	.	.	.
>LE01Gene11240	7.31497	6.88952	6.91937	8.96505	9.33453	8.54245	1.93659	8.34e-06	2.92e-05	>LE01Gene11240	.	.	.	.	.	.
>LE01Gene11739	8.63322	8.54662	8.71645	10.6304	10.6364	10.425	1.93624	2.88e-09	1.79e-08	>LE01Gene11739	.	PF04248.11^NTP_transf_9^Domain of unknown function (DUF427)^485-561^E:6e-07`PF04248.11^NTP_transf_9^Domain of unknown function (DUF427)^603-695^E:6e-27	.	.	.	.
>LE01Gene09497	9.06314	8.42245	8.84544	10.6938	11.0586	10.3664	1.9356	1.24e-13	1.56e-12	>LE01Gene09497	.	PF07200.12^Mod_r^Modifier of rudimentary (Mod(r)) protein^20-178^E:2e-43	.	.	.	.
>LE01Gene09468	6.64408	6.86588	7.90127	8.87878	9.41435	9.18107	1.93524	1.33e-07	6.32e-07	>LE01Gene09468	.	.	.	.	.	.
>LE01Gene09455	7.07641	7.55417	8.31175	9.60299	9.64256	9.74711	1.9325	4.7e-08	2.39e-07	>LE01Gene09455	.	.	.	.	.	.
>LE01Gene10434	3.66094	4.27121	0	5.39822	5.34426	5.13283	1.93234	0.000975387	0.00231303	>LE01Gene10434	.	.	.	.	.	.
>LE01Gene00784	4.54393	5.34018	4.25985	6.61935	6.7194	6.7187	1.93208	5.94e-10	4.13e-09	>LE01Gene00784	.	.	.	.	.	.
>LE01Gene02390	11.7673	11.5746	12.2199	14.0781	13.5259	13.7729	1.9305	1.21e-12	1.29e-11	>LE01Gene02390	PGK_AGABI^PGK_AGABI^Q:25-1272,H:1-416^78.6%ID^E:1.7e-188^RecName: Full=Phosphoglycerate kinase	PF00162.18^PGK^Phosphoglycerate kinase^17-413^E:5.1e-146	.	.	GO:0005737^cellular_component^cytoplasm`GO:0005524^molecular_function^ATP binding`GO:0004618^molecular_function^phosphoglycerate kinase activity`GO:0006096^biological_process^glycolytic process	GO:0004618^molecular_function^phosphoglycerate kinase activity`GO:0006096^biological_process^glycolytic process
>LE01Gene05439	11.4655	11.2268	11.7008	13.5299	13.2333	13.4376	1.9286	7.25e-17	1.48e-15	>LE01Gene05439	RANG_SCHPO^RANG_SCHPO^Q:118-540,H:72-211^70.2%ID^E:2.9e-50^RecName: Full=Ran-specific GTPase-activating protein 1	PF00638.17^Ran_BP1^RanBP1 domain^31-151^E:1.3e-49	.	KEGG:spo:SPBC1773.07c`KO:K15306	GO:0005829^cellular_component^cytosol`GO:0005634^cellular_component^nucleus`GO:0005525^molecular_function^GTP binding`GO:0005096^molecular_function^GTPase activator activity`GO:0008536^molecular_function^Ran GTPase binding`GO:0000082^biological_process^G1/S transition of mitotic cell cycle`GO:0006606^biological_process^protein import into nucleus`GO:0031291^biological_process^Ran protein signal t…	GO:0046907^biological_process^intracellular transport
>LE01Gene08693	8.85811	8.83237	10.1	11.0068	10.591	11.9907	1.92841	2.57e-08	1.36e-07	>LE01Gene08693	I23O_YEAST^I23O_YEAST^Q:463-1425,H:28-338^30.9%ID^E:6.5e-27^RecName: Full=Indoleamine 2,3-dioxygenase	.	.	.	.	.
>LE01Gene04317	11.1252	11.2786	10.6546	13.0335	13.5557	11.8318	1.92748	2.88e-08	1.51e-07	>LE01Gene04317	.	.	.	.	.	.
>LE01Gene06705	7.38367	7.85368	7.55941	9.40415	10.0515	8.91081	1.92483	3.69e-08	1.91e-07	>LE01Gene06705	.	PF12697.6^Abhydrolase_6^Alpha/beta hydrolase family^91-395^E:1.8e-11	.	.	.	.
>LE01Gene12858	7.27031	6.74147	7.2979	8.90998	9.4123	8.70839	1.92461	7.25e-11	5.79e-10	>LE01Gene12858	.	.	.	.	.	.
>LE01Gene08697	9.55898	9.17787	9.5322	11.4636	11.2704	11.3269	1.92447	6.4e-30	8.31e-28	>LE01Gene08697	ITP1_USTMD^ITP1_USTMD^Q:344-1822,H:26-489^31.5%ID^E:1.7e-61^RecName: Full=Itaconate transport protein {ECO:0000303|PubMed:26639528}	PF07690.15^MFS_1^Major Facilitator Superfamily^84-386^E:5.5e-41`PF00083.23^Sugar_tr^Sugar (and other) transporter^85-269^E:4.6e-10	.	.	GO:0016021^cellular_component^integral component of membrane`GO:0005886^cellular_component^plasma membrane`GO:0055085^biological_process^transmembrane transport	GO:0055085^biological_process^transmembrane transport`GO:0016021^cellular_component^integral component of membrane`GO:0022857^molecular_function^transmembrane transporter activity
>LE01Gene13394	7.27031	6.28708	6.89512	9.08425	8.64436	8.57798	1.92406	2.36e-10	1.73e-09	>LE01Gene13394	LIMK2_HUMAN^LIMK2_HUMAN^Q:202-507,H:384-486^36.2%ID^E:1e-07^RecName: Full=LIM domain kinase 2	PF00069.24^Pkinase^Protein kinase domain^56-159^E:4e-08`PF07714.16^Pkinase_Tyr^Protein tyrosine kinase^57-153^E:2.7e-08	ENOG410XP9G^mitogen-activated protein kinase kinase kinase kinase	KEGG:ddi:DDB_G0293932	GO:0005737^cellular_component^cytoplasm`GO:0005524^molecular_function^ATP binding`GO:0046872^molecular_function^metal ion binding`GO:0004674^molecular_function^protein serine/threonine kinase activity`GO:0032147^biological_process^activation of protein kinase activity`GO:0043327^biological_process^chemotaxis to cAMP`GO:0006468^biological_process^protein phosphorylation`GO:0007346^biological_proce…	GO:0004672^molecular_function^protein kinase activity`GO:0005524^molecular_function^ATP binding`GO:0006468^biological_process^protein phosphorylation
>LE01Gene12274	7.77113	8.53167	7.26989	10.41	9.77894	9.15255	1.92271	1.54e-06	6.19e-06	>LE01Gene12274	.	.	.	.	.	.
>LE01Gene06745	7.34973	5.94741	8.31175	9.049	9.71899	9.39759	1.92196	5.89e-05	0.000176748	>LE01Gene06745	PATO_ASPCL^PATO_ASPCL^Q:1087-2694,H:29-565^42%ID^E:5.9e-124^RecName: Full=FAD-linked oxidoreductase patO {ECO:0000303|PubMed:19383676}	PF01565.22^FAD_binding_4^FAD binding domain^127-267^E:4e-20`PF08031.11^BBE^Berberine and berberine like^512-548^E:5.6e-09	.	KEGG:act:ACLA_093700	GO:0071949^molecular_function^FAD binding`GO:0016491^molecular_function^oxidoreductase activity	GO:0016491^molecular_function^oxidoreductase activity`GO:0050660^molecular_function^flavin adenine dinucleotide binding`GO:0055114^biological_process^oxidation-reduction process
>LE01Gene08297	11.3575	11.2725	11.5263	13.0533	13.8514	12.8106	1.92099	6.79e-06	2.42e-05	>LE01Gene08297	DAL5_YEAST^DAL5_YEAST^Q:19-1581,H:14-535^31.7%ID^E:4.3e-63^RecName: Full=Allantoate permease	PF07690.15^MFS_1^Major Facilitator Superfamily^81-449^E:1.8e-31	.	KEGG:spo:SPCC417.10`KO:K08192	GO:0032153^cellular_component^cell division site`GO:0051286^cellular_component^cell tip`GO:0005783^cellular_component^endoplasmic reticulum`GO:0005794^cellular_component^Golgi apparatus`GO:0016021^cellular_component^integral component of membrane`GO:0071916^molecular_function^dipeptide transmembrane transporter activity`GO:0035442^biological_process^dipeptide transmembrane transport	GO:0055085^biological_process^transmembrane transport`GO:0016021^cellular_component^integral component of membrane
>LE01Gene12355	11.4359	11.0982	11.6515	13.2781	13.2495	13.4623	1.92066	2.14e-17	4.69e-16	>LE01Gene12355	HOL3_ARATH^HOL3_ARATH^Q:367-1002,H:29-220^39.6%ID^E:2.4e-32^RecName: Full=Probable thiol methyltransferase 2	PF05724.10^TPMT^Thiopurine S-methyltransferase (TPMT)^21-212^E:1.9e-33`PF03848.13^TehB^Tellurite resistance protein TehB^57-169^E:6e-05`PF13847.5^Methyltransf_31^Methyltransferase domain^61-168^E:7.1e-13`PF08241.11^Methyltransf_11^Methyltransferase domain^64-167^E:7e-09`PF13649.5^Methyltransf_25^Methyltransferase domain^66-164^E:2.9e-12	COG0500^Methyltransferase	KEGG:ath:AT2G43940`KO:K21552	GO:0009507^cellular_component^chloroplast`GO:0009941^cellular_component^chloroplast envelope`GO:0018708^molecular_function^thiol S-methyltransferase activity	GO:0008757^molecular_function^S-adenosylmethionine-dependent methyltransferase activity`GO:0008168^molecular_function^methyltransferase activity
>LE01Gene11279	6.18655	6.01346	6.16215	7.37233	7.58763	8.73311	1.9205	5.03e-08	2.54e-07	>LE01Gene11279	.	.	.	.	.	.
>LE01Gene08110	4.35154	5.47131	4.0118	6.84748	7.23648	4.99944	1.92017	0.00123358	0.00286374	>LE01Gene08110	.	.	.	.	.	.
>LE01Gene10475	7.75177	7.58346	7.81988	9.79453	9.57104	9.52846	1.91967	6.01e-13	6.74e-12	>LE01Gene10475	RHB1_SCHPO^RHB1_SCHPO^Q:37-582,H:4-170^47.8%ID^E:3.6e-39^RecName: Full=GTP-binding protein rhb1	.	.	.	.	.
>LE01Gene00711	6.81551	6.37346	6.93134	8.86726	8.50163	8.50192	1.91901	1.92e-12	1.98e-11	>LE01Gene00711	SET11_SCHPO^SET11_SCHPO^Q:223-1215,H:39-307^25.8%ID^E:9.7e-20^RecName: Full=Ribosomal lysine N-methyltransferase set11	.	.	.	.	.
>LE01Gene00733	10.754	10.9599	11.8131	13.3223	13.2572	12.8955	1.91863	2.07e-11	1.8e-10	>LE01Gene00733	F16P2_SOLTU^F16P2_SOLTU^Q:136-1113,H:10-335^61.5%ID^E:1.2e-113^RecName: Full=Fructose-1,6-bisphosphatase, cytosolic	PF00316.19^FBPase^Fructose-1-6-bisphosphatase, N-terminal domain^49-238^E:1e-72`PF00459.24^Inositol_P^Inositol monophosphatase family^75-165^E:0.00026	COG0158^D-fructose-1,6-bisphosphate 1-phosphohydrolase class 1	KEGG:sot:102588954`KO:K03841	GO:0005737^cellular_component^cytoplasm`GO:0042132^molecular_function^fructose 1,6-bisphosphate 1-phosphatase activity`GO:0046872^molecular_function^metal ion binding`GO:0005975^biological_process^carbohydrate metabolic process	GO:0046854^biological_process^phosphatidylinositol phosphorylation
>LE01Gene01413	6.52747	7.24153	6.48817	8.91279	8.79635	8.3412	1.91727	2.16e-05	7.05e-05	>LE01Gene01413	URHG2_BACSU^URHG2_BACSU^Q:456-1487,H:41-367^31.1%ID^E:1.7e-43^RecName: Full=Unsaturated rhamnogalacturonyl hydrolase YteR	PF07470.12^Glyco_hydro_88^Glycosyl Hydrolase Family 88^49-392^E:2.1e-59	COG4225^Glycosyl Hydrolase Family 88	KEGG:atu:Atu3128	GO:0016787^molecular_function^hydrolase activity	.
>LE01Gene12681	8.36242	8.56141	8.30256	10.4229	10.6329	9.79989	1.91653	2.42e-12	2.45e-11	>LE01Gene12681	.	.	.	.	.	.
>LE01Gene03121	10.3887	10.0746	10.3822	12.3414	12.2365	12.0168	1.91632	6.41e-16	1.15e-14	>LE01Gene03121	NUDC_EMENI^NUDC_EMENI^Q:49-594,H:1-197^50.3%ID^E:2.7e-46^RecName: Full=Nuclear movement protein nudC	PF04969.15^CS^CS domain^35-109^E:2.8e-18	.	KEGG:ani:AN5181.2	GO:0005737^cellular_component^cytoplasm`GO:0005874^cellular_component^microtubule`GO:0051082^molecular_function^unfolded protein binding`GO:0007049^biological_process^cell cycle`GO:0051301^biological_process^cell division`GO:0032502^biological_process^developmental process`GO:0031505^biological_process^fungal-type cell wall organization`GO:0000741^biological_process^karyogamy`GO:0030473^biologica…	.
>LE01Gene01448	8.17647	8.23676	7.39621	10.1076	9.76779	9.78476	1.91532	1.04e-14	1.56e-13	>LE01Gene01448	MANBB_THIHE^MANBB_THIHE^Q:803-2902,H:171-853^39.9%ID^E:2.1e-143^RecName: Full=Beta-mannosidase B	.	.	.	.	.
>LE01Gene11715	9.01523	8.95229	8.98122	10.6757	11.2275	10.7174	1.9151	9.61e-23	4.36e-21	>LE01Gene11715	ABNC_ASPNC^ABNC_ASPNC^Q:512-784,H:30-121^37.9%ID^E:0.00064^RecName: Full=Probable arabinan endo-1,5-alpha-L-arabinosidase C	PF04616.13^Glyco_hydro_43^Glycosyl hydrolases family 43^14-109^E:2.2e-07	.	.	.	GO:0004553^molecular_function^hydrolase activity, hydrolyzing O-glycosyl compounds`GO:0005975^biological_process^carbohydrate metabolic process
>LE01Gene07733	6.06631	7.05548	5.89501	8.66926	8.32159	7.92917	1.91498	7.94e-08	3.89e-07	>LE01Gene07733	.	.	.	.	.	.
>LE01Gene11646	9.97261	10.7369	10.944	12.4549	12.4421	12.6577	1.91462	6.43e-09	3.77e-08	>LE01Gene11646	LACP_KLULA^LACP_KLULA^Q:210-1679,H:65-551^31.9%ID^E:9.4e-67^RecName: Full=Lactose permease	.	.	.	.	.
>LE01Gene04116	7.94601	7.84766	7.17236	10.1319	9.33021	9.14993	1.91459	3.7e-08	1.91e-07	>LE01Gene04116	.	PF00775.20^Dioxygenase_C^Dioxygenase^130-224^E:1e-08	.	.	.	GO:0003824^molecular_function^catalytic activity`GO:0008199^molecular_function^ferric iron binding`GO:0006725^biological_process^cellular aromatic compound metabolic process`GO:0055114^biological_process^oxidation-reduction process
>LE01Gene09771	6.27963	7.04499	7.11052	8.25761	9.02231	8.89837	1.9144	3.26e-05	0.000102673	>LE01Gene09771	LAEA_ASPFN^LAEA_ASPFN^Q:31-453,H:93-224^32.9%ID^E:4.5e-10^RecName: Full=Secondary metabolism regulator laeA {ECO:0000305}	PF13489.5^Methyltransf_23^Methyltransferase domain^46-170^E:2.8e-12`PF12692.6^Methyltransf_17^S-adenosyl-L-methionine methyltransferase^46-153^E:0.00097`PF13847.5^Methyltransf_31^Methyltransferase domain^60-173^E:8.6e-12`PF13649.5^Methyltransf_25^Methyltransferase domain^62-150^E:1.5e-10`PF08241.11^Methyltransf_11^Methyltransferase domain^63-153^E:1.6e-09	.	KEGG:afv:AFLA_033290	GO:0005634^cellular_component^nucleus`GO:0008168^molecular_function^methyltransferase activity`GO:0009405^biological_process^pathogenesis`GO:0006355^biological_process^regulation of transcription, DNA-templated`GO:0030435^biological_process^sporulation resulting in formation of a cellular spore`GO:0006351^biological_process^transcription, DNA-templated	GO:0008168^molecular_function^methyltransferase activity
>LE01Gene00649	6.43338	6.17611	5.26018	8.31385	7.88759	7.4894	1.91416	1.45e-07	6.83e-07	>LE01Gene00649	.	.	.	.	.	.
>LE01Gene12378	8.44913	8.57606	8.5824	10.4665	10.3979	10.4782	1.91367	5.01e-16	9.26e-15	>LE01Gene12378	.	.	.	.	.	.
>LE01Gene12113	6.82789	6.60531	6.62716	8.48185	9.39377	7.00055	1.91294	0.000598185	0.00148259	>LE01Gene12113	3SHD_NEUCR^3SHD_NEUCR^Q:141-1193,H:4-330^29.9%ID^E:2.9e-40^RecName: Full=3-dehydroshikimate dehydratase	.	.	.	.	.
>LE01Gene03526	10.9768	11.1724	11.6587	13.0012	13.3811	13.2215	1.91157	6.59e-16	1.18e-14	>LE01Gene03526	CBBY_RHOCA^CBBY_RHOCA^Q:853-1056,H:152-219^39.7%ID^E:5.8e-05^RecName: Full=Protein CbbY	PF00702.25^Hydrolase^haloacid dehalogenase-like hydrolase^7-216^E:1e-09`PF13419.5^HAD_2^Haloacid dehalogenase-like hydrolase^8-221^E:6.5e-22`PF13242.5^Hydrolase_like^HAD-hyrolase-like^178-234^E:4.3e-06	.	.	.	.
>LE01Gene11374	7.40035	7.88342	7.73362	9.55713	9.90209	9.2414	1.91119	3.87e-16	7.27e-15	>LE01Gene11374	COX2_COPC7^COX2_COPC7^Q:414-1688,H:89-525^32.8%ID^E:5.3e-60^RecName: Full=Cytochrome P450 monooxygenase COX2 {ECO:0000303|PubMed:19400802}	.	.	.	.	.
>LE01Gene06300	9.37296	9.7604	9.47609	11.745	11.6702	10.7575	1.91055	7.72e-08	3.79e-07	>LE01Gene06300	BGL06_ORYSJ^BGL06_ORYSJ^Q:496-1890,H:50-511^34%ID^E:2.1e-71^RecName: Full=Beta-glucosidase 6 {ECO:0000305}	PF00232.17^Glyco_hydro_1^Glycosyl hydrolase family 1^165-640^E:3.6e-103	COG2723^beta-glucosidase	KEGG:osa:4332041`KO:K01188	GO:0005576^cellular_component^extracellular region`GO:0033907^molecular_function^beta-D-fucosidase activity`GO:0004565^molecular_function^beta-galactosidase activity`GO:0080083^molecular_function^beta-gentiobiose beta-glucosidase activity`GO:0008422^molecular_function^beta-glucosidase activity`GO:0080079^molecular_function^cellobiose glucosidase activity`GO:0042973^molecular_function^glucan endo-…	GO:0004553^molecular_function^hydrolase activity, hydrolyzing O-glycosyl compounds`GO:0005975^biological_process^carbohydrate metabolic process
>LE01Gene07141	4.20737	4.34147	3.18111	5.46086	6.30892	5.60033	1.91009	2.06e-05	6.74e-05	>LE01Gene07141	.	.	.	.	.	.
>LE01Gene11951	5.00287	6.19521	6.59741	7.48211	7.89932	8.38197	1.90959	0.000174606	0.000477613	>LE01Gene11951	PATH_ASPCL^PATH_ASPCL^Q:729-2027,H:29-465^30.7%ID^E:3e-57^RecName: Full=Cytochrome P450 monooxygenase patH {ECO:0000303|PubMed:19383676}	PF00067.21^p450^Cytochrome P450^85-515^E:1.1e-81	.	.	GO:0020037^molecular_function^heme binding`GO:0005506^molecular_function^iron ion binding`GO:0004497^molecular_function^monooxygenase activity`GO:0016705^molecular_function^oxidoreductase activity, acting on paired donors, with incorporation or reduction of molecular oxygen`GO:0016114^biological_process^terpenoid biosynthetic process	GO:0005506^molecular_function^iron ion binding`GO:0016705^molecular_function^oxidoreductase activity, acting on paired donors, with incorporation or reduction of molecular oxygen`GO:0020037^molecular_function^heme binding`GO:0055114^biological_process^oxidation-reduction process
>LE01Gene12309	8.95724	8.94667	9.23656	11.3056	10.7231	10.7738	1.90831	2.32e-27	2.05e-25	>LE01Gene12309	FDH_CANBO^FDH_CANBO^Q:325-1398,H:1-361^62.9%ID^E:1.7e-133^RecName: Full=Formate dehydrogenase {ECO:0000255|HAMAP-Rule:MF_03210, ECO:0000312|EMBL:CAB54834.1}	PF00389.29^2-Hacid_dh^D-isomer specific 2-hydroxyacid dehydrogenase, catalytic domain^38-340^E:2e-18`PF02826.18^2-Hacid_dh_C^D-isomer specific 2-hydroxyacid dehydrogenase, NAD binding domain^127-298^E:1.6e-46	.	.	GO:0005829^cellular_component^cytosol`GO:0005524^molecular_function^ATP binding`GO:0008863^molecular_function^formate dehydrogenase (NAD+) activity`GO:0070403^molecular_function^NAD+ binding`GO:0016616^molecular_function^oxidoreductase activity, acting on the CH-OH group of donors, NAD or NADP as acceptor`GO:0042803^molecular_function^protein homodimerization activity`GO:0042426^biological_proces…	GO:0016616^molecular_function^oxidoreductase activity, acting on the CH-OH group of donors, NAD or NADP as acceptor`GO:0051287^molecular_function^NAD binding`GO:0055114^biological_process^oxidation-reduction process
>LE01Gene13406	5.08768	5.83013	5.62703	6.82385	8.00079	7.21633	1.90746	5.33e-08	2.69e-07	>LE01Gene13406	.	.	.	.	.	.
>LE01Gene08096	9.98786	10.0208	10.0679	11.9276	12.0922	11.7575	1.90744	6.84e-19	1.9e-17	>LE01Gene08096	DRG2_BOVIN^DRG2_BOVIN^Q:45-1142,H:1-364^65.8%ID^E:6.2e-139^RecName: Full=Developmentally-regulated GTP-binding protein 2	PF01926.22^MMR_HSR1^50S ribosome-binding GTPase^78-174^E:2.7e-20`PF02421.17^FeoB_N^Ferrous iron transport protein B^78-167^E:5.1e-11`PF16897.4^MMR_HSR1_Xtn^C-terminal region of MMR_HSR1 domain^198-303^E:2.4e-44`PF02824.20^TGS^TGS domain^304-379^E:2.5e-19	COG1163^GTP-Binding protein	KEGG:bta:507472`KO:K06944	GO:0005829^cellular_component^cytosol`GO:0005654^cellular_component^nucleoplasm`GO:0005525^molecular_function^GTP binding	GO:0005525^molecular_function^GTP binding
>LE01Gene13969	10.0644	10.2227	10.4832	12.3378	12.0906	12.0625	1.9027	8.74e-09	5.01e-08	>LE01Gene13969	YUC4_ARATH^YUC4_ARATH^Q:1118-2140,H:15-324^28.1%ID^E:1.6e-23^RecName: Full=Probable indole-3-pyruvate monooxygenase YUCCA4	.	.	.	.	.
>LE01Gene00018	12.7625	12.9629	13.5795	14.7595	14.8778	15.4153	1.90191	4.55e-07	1.98e-06	>LE01Gene00018	YKJ7_SCHPO^YKJ7_SCHPO^Q:460-1356,H:1-310^33.1%ID^E:3.4e-28^RecName: Full=Putative uncharacterized oxidoreductase C513.07	.	.	.	.	.
>LE01Gene02076	10.0287	10.046	10.2462	11.971	11.88	12.1673	1.90172	4.46e-13	5.11e-12	>LE01Gene02076	CITE_MONPU^CITE_MONPU^Q:157-984,H:16-287^29.3%ID^E:6.7e-21^RecName: Full=Short chain dehydrogenase mpl6 {ECO:0000303|PubMed:27913218}	PF00106.24^adh_short^short chain dehydrogenase^33-233^E:1.9e-24`PF08659.9^KR^KR domain^34-199^E:1.2e-09`PF02719.14^Polysacc_synt_2^Polysaccharide biosynthesis protein^34-112^E:1.7e-06`PF13561.5^adh_short_C2^Enoyl-(Acyl carrier protein) reductase^42-232^E:1.4e-13	COG1028^Dehydrogenase reductase	KEGG:hsa:9249`KO:K11146	GO:0005789^cellular_component^endoplasmic reticulum membrane`GO:0016021^cellular_component^integral component of membrane`GO:0042622^cellular_component^photoreceptor outer segment membrane`GO:0009055^molecular_function^electron transfer activity`GO:0052650^molecular_function^NADP-retinol dehydrogenase activity`GO:0000166^molecular_function^nucleotide binding`GO:0004745^molecular_function^retinol …	.
>LE01Gene01150	9.84746	10.5259	11.0439	12.517	12.389	12.4519	1.90139	3.4e-10	2.46e-09	>LE01Gene01150	PIP_LEPBY^PIP_LEPBY^Q:129-1058,H:4-312^62.4%ID^E:3e-110^RecName: Full=Probable proline iminopeptidase	PF00561.19^Abhydrolase_1^alpha/beta hydrolase fold^33-293^E:6.8e-34`PF12697.6^Abhydrolase_6^Alpha/beta hydrolase family^34-293^E:2e-08`PF12146.7^Hydrolase_4^Serine aminopeptidase, S33^53-292^E:1.4e-11	.	.	GO:0005737^cellular_component^cytoplasm`GO:0004177^molecular_function^aminopeptidase activity	.
>LE01Gene04024	8.72544	8.25052	8.82954	10.1652	10.7525	10.581	1.89987	5.81e-18	1.38e-16	>LE01Gene04024	.	.	.	.	.	.
>LE01Gene01319	7.40035	7.84161	7.2509	9.38812	9.26144	9.57609	1.89948	6.17e-16	1.12e-14	>LE01Gene01319	.	.	.	.	.	.
>LE01Gene08238	9.96842	9.85951	10.3657	12.1756	11.9028	11.8375	1.89924	4.11e-12	3.99e-11	>LE01Gene08238	YBQ3_SCHPO^YBQ3_SCHPO^Q:290-1471,H:1-368^37.8%ID^E:1.4e-63^RecName: Full=Uncharacterized oxidoreductase C115.03	PF01408.21^GFO_IDH_MocA^Oxidoreductase family, NAD-binding Rossmann fold^5-126^E:6.4e-24`PF02894.16^GFO_IDH_MocA_C^Oxidoreductase family, C-terminal alpha/beta domain^154-234^E:3.1e-09	.	KEGG:spo:SPBC115.03	GO:0005829^cellular_component^cytosol`GO:0005634^cellular_component^nucleus`GO:0016491^molecular_function^oxidoreductase activity`GO:0006740^biological_process^NADPH regeneration	GO:0016491^molecular_function^oxidoreductase activity`GO:0055114^biological_process^oxidation-reduction process
>LE01Gene00106	7.88215	7.715	7.39621	9.18973	9.64952	9.80822	1.89879	7.48e-07	3.15e-06	>LE01Gene00106	STCW_EMENI^STCW_EMENI^Q:195-1952,H:14-559^29.1%ID^E:4.9e-77^RecName: Full=Putative sterigmatocystin biosynthesis monooxygenase stcW	.	.	.	.	.
>LE01Gene01929	8.68177	8.56875	8.80697	10.8028	11.0567	9.43467	1.89869	6.54e-06	2.34e-05	>LE01Gene01929	.	.	.	.	.	.
>LE01Gene11312	3.42053	3.7578	4.87013	6.41305	5.95153	5.43795	1.89726	0.000580656	0.00144343	>LE01Gene11312	.	.	.	.	.	.
>LE01Gene00141	9.73692	9.71315	10.2629	11.9551	11.8284	11.6724	1.89706	1.14e-16	2.27e-15	>LE01Gene00141	IST1_MOUSE^IST1_MOUSE^Q:1371-1883,H:6-177^41.6%ID^E:1.3e-28^RecName: Full=IST1 homolog	.	.	.	.	.
>LE01Gene04333	11.6602	11.5273	12.0658	13.8552	13.64	13.4794	1.89703	2.22e-12	2.26e-11	>LE01Gene04333	.	.	.	.	.	.
>LE01Gene09309	9.97818	9.53347	10.3289	11.4607	11.7061	12.3263	1.8966	4.33e-11	3.58e-10	>LE01Gene09309	.	.	.	.	.	.
>LE01Gene09107	5.98019	3.41093	6.36998	7.4125	7.71253	7.59337	1.8951	6.54e-05	0.000194742	>LE01Gene09107	.	.	.	.	.	.
>LE01Gene09335	9.70204	9.56502	9.89062	11.8175	11.7533	11.2104	1.89415	7.24e-13	8.01e-12	>LE01Gene09335	GMFG_BOVIN^GMFG_BOVIN^Q:32-436,H:9-137^39.3%ID^E:9.9e-17^RecName: Full=Glia maturation factor gamma	PF00241.19^Cofilin_ADF^Cofilin/tropomyosin-type actin-binding protein^17-139^E:2.6e-15	.	KEGG:spo:SPAC17H9.11	GO:0030479^cellular_component^actin cortical patch`GO:0005829^cellular_component^cytosol`GO:0005634^cellular_component^nucleus`GO:0071933^molecular_function^Arp2/3 complex binding`GO:0000147^biological_process^actin cortical patch assembly`GO:0034316^biological_process^negative regulation of Arp2/3 complex-mediated actin nucleation	GO:0003779^molecular_function^actin binding`GO:0005622^cellular_component^intracellular
>LE01Gene10195	9.83678	9.90951	10.3974	10.3157	12.3023	12.4643	1.89382	3.51e-05	0.000109729	>LE01Gene10195	FAAH1_MOUSE^FAAH1_MOUSE^Q:498-2075,H:72-572^33%ID^E:3.7e-66^RecName: Full=Fatty-acid amide hydrolase 1	PF01425.20^Amidase^Amidase^64-556^E:1.8e-87	.	KEGG:spo:SPBPB8B6.03`KO:K01426	GO:0005829^cellular_component^cytosol`GO:0004040^molecular_function^amidase activity`GO:0017064^molecular_function^fatty acid amide hydrolase activity`GO:0043864^molecular_function^indoleacetamide hydrolase activity`GO:0009062^biological_process^fatty acid catabolic process	.
>LE01Gene11074	6.85234	6.76722	7.85802	8.43971	8.91664	9.74364	1.89373	1.72e-07	8.03e-07	>LE01Gene11074	.	.	.	.	.	.
>LE01Gene05481	13.5602	12.8839	13.9351	15.3465	15.6565	15.2058	1.89306	1.28e-06	5.19e-06	>LE01Gene05481	FADH_CANMA^FADH_CANMA^Q:46-1188,H:5-381^64.9%ID^E:1.1e-144^RecName: Full=S-(hydroxymethyl)glutathione dehydrogenase	PF08240.11^ADH_N^Alcohol dehydrogenase GroES-like domain^36-133^E:1.9e-24`PF00107.25^ADH_zinc_N^Zinc-binding dehydrogenase^209-334^E:5.8e-18	.	.	GO:0051903^molecular_function^S-(hydroxymethyl)glutathione dehydrogenase activity`GO:0008270^molecular_function^zinc ion binding`GO:0006069^biological_process^ethanol oxidation	GO:0055114^biological_process^oxidation-reduction process
>LE01Gene13733	7.72554	8.0605	7.52031	9.57848	10.2281	8.92927	1.89306	3.48e-08	1.81e-07	>LE01Gene13733	U72B3_ARATH^U72B3_ARATH^Q:1000-1743,H:205-439^27.6%ID^E:3.3e-14^RecName: Full=UDP-glycosyltransferase 72B3	PF00201.17^UDPGT^UDP-glucoronosyl and UDP-glucosyl transferase^310-436^E:2.5e-18	COG1819^Transferase	KEGG:ath:AT1G22370	GO:0043231^cellular_component^intracellular membrane-bounded organelle`GO:0015020^molecular_function^glucuronosyltransferase activity`GO:0080043^molecular_function^quercetin 3-O-glucosyltransferase activity`GO:0080044^molecular_function^quercetin 7-O-glucosyltransferase activity`GO:0008152^biological_process^metabolic process	GO:0016758^molecular_function^transferase activity, transferring hexosyl groups
>LE01Gene05679	12.8851	12.8964	13.0413	15.182	14.5583	14.6859	1.89203	9.26e-12	8.49e-11	>LE01Gene05679	EF1G_SCHPO^EF1G_SCHPO^Q:62-1312,H:1-406^41.2%ID^E:3.7e-61^RecName: Full=Elongation factor 1-gamma	.	.	.	.	.
>LE01Gene02637	8.37513	8.9579	9.69556	11.0127	10.7501	11.2022	1.89152	3.33e-09	2.05e-08	>LE01Gene02637	ZPR1_SCHPO^ZPR1_SCHPO^Q:1-1488,H:1-455^47.1%ID^E:9.3e-119^RecName: Full=Zinc finger protein zpr1	.	.	.	.	.
>LE01Gene03564	10.0735	9.79993	9.89826	11.57	12.3815	11.2628	1.89094	3.63e-06	1.36e-05	>LE01Gene03564	TTUC4_AGRVI^TTUC4_AGRVI^Q:373-1407,H:4-348^67.8%ID^E:5e-136^RecName: Full=Probable tartrate dehydrogenase/decarboxylase TtuC'	PF00180.19^Iso_dh^Isocitrate/isopropylmalate dehydrogenase^31-374^E:4.4e-89	.	.	GO:0005737^cellular_component^cytoplasm`GO:0046553^molecular_function^D-malate dehydrogenase (decarboxylating) activity`GO:0000287^molecular_function^magnesium ion binding`GO:0051287^molecular_function^NAD binding`GO:0050319^molecular_function^tartrate decarboxylase activity`GO:0009027^molecular_function^tartrate dehydrogenase activity	GO:0016616^molecular_function^oxidoreductase activity, acting on the CH-OH group of donors, NAD or NADP as acceptor`GO:0055114^biological_process^oxidation-reduction process
>LE01Gene12744	6.4006	6.94699	7.86427	8.59091	9.56184	8.92007	1.89058	6.21e-07	2.65e-06	>LE01Gene12744	CSN5_CRYNB^CSN5_CRYNB^Q:213-674,H:75-228^59.1%ID^E:3.2e-48^RecName: Full=COP9 signalosome complex subunit 5	.	.	KEGG:uma:UMAG_03759`KO:K09613	GO:0008180^cellular_component^COP9 signalosome`GO:0005737^cellular_component^cytoplasm`GO:0046872^molecular_function^metal ion binding`GO:0004222^molecular_function^metalloendopeptidase activity`GO:0019784^molecular_function^NEDD8-specific protease activity`GO:0000338^biological_process^protein deneddylation	.
>LE01Gene04738	9.92442	9.77476	10.6973	12.4317	11.8091	11.9209	1.88971	6.08e-09	3.58e-08	>LE01Gene04738	CAO1_SCHPO^CAO1_SCHPO^Q:252-2309,H:25-665^39.5%ID^E:3.7e-125^RecName: Full=Copper amine oxidase 1	.	.	.	.	.
>LE01Gene05091	10.2403	10.3655	10.3745	11.8327	12.6929	11.9682	1.88905	3.25e-11	2.74e-10	>LE01Gene05091	GTO2_SCHPO^GTO2_SCHPO^Q:173-1027,H:13-297^56.9%ID^E:6.4e-92^RecName: Full=Glutathione S-transferase omega-like 2	PF13409.5^GST_N_2^Glutathione S-transferase, N-terminal domain^86-184^E:1e-21`PF00043.24^GST_C^Glutathione S-transferase, C-terminal domain^229-308^E:7.7e-07`PF13410.5^GST_C_2^Glutathione S-transferase, C-terminal domain^235-306^E:1.1e-13	.	KEGG:spo:SPCC1281.07c`KO:K07393	GO:0005737^cellular_component^cytoplasm`GO:0005829^cellular_component^cytosol`GO:0005794^cellular_component^Golgi apparatus`GO:0005634^cellular_component^nucleus`GO:0045174^molecular_function^glutathione dehydrogenase (ascorbate) activity`GO:0004364^molecular_function^glutathione transferase activity`GO:0071555^biological_process^cell wall organization`GO:0098869^biological_process^cellular oxida…	GO:0005515^molecular_function^protein binding
>LE01Gene05160	9.30816	9.23205	9.74897	10.6962	11.4506	11.6847	1.88823	3.79e-07	1.67e-06	>LE01Gene05160	FGOX3_PENRF^FGOX3_PENRF^Q:113-1258,H:2-360^46.9%ID^E:5e-93^RecName: Full=Chanoclavine-I aldehyde reductase fgaOx3 {ECO:0000303|PubMed:28902217}	PF00724.19^Oxidored_FMN^NADH:flavin oxidoreductase / NADH oxidase family^5-358^E:8.7e-101	.	.	GO:0010181^molecular_function^FMN binding`GO:0016491^molecular_function^oxidoreductase activity`GO:0035835^biological_process^indole alkaloid biosynthetic process	GO:0010181^molecular_function^FMN binding`GO:0016491^molecular_function^oxidoreductase activity`GO:0055114^biological_process^oxidation-reduction process
>LE01Gene02075	11.0598	11.1784	10.8486	13.042	13.2143	12.3841	1.88722	6.37e-09	3.74e-08	>LE01Gene02075	CITE_MONPU^CITE_MONPU^Q:48-866,H:13-278^32.1%ID^E:1.7e-27^RecName: Full=Short chain dehydrogenase mpl6 {ECO:0000303|PubMed:27913218}	PF00106.24^adh_short^short chain dehydrogenase^33-235^E:4.5e-24`PF08659.9^KR^KR domain^34-202^E:4.5e-09`PF02719.14^Polysacc_synt_2^Polysaccharide biosynthesis protein^34-108^E:2.4e-05`PF13561.5^adh_short_C2^Enoyl-(Acyl carrier protein) reductase^42-234^E:2.2e-14	COG1028^Dehydrogenase reductase	KEGG:hsa:9249`KO:K11146	GO:0005789^cellular_component^endoplasmic reticulum membrane`GO:0016021^cellular_component^integral component of membrane`GO:0042622^cellular_component^photoreceptor outer segment membrane`GO:0009055^molecular_function^electron transfer activity`GO:0052650^molecular_function^NADP-retinol dehydrogenase activity`GO:0000166^molecular_function^nucleotide binding`GO:0004745^molecular_function^retinol …	.
>LE01Gene14217	8.11718	7.09669	7.80043	9.275	9.57287	9.91858	1.88652	7.26e-06	2.56e-05	>LE01Gene14217	.	.	.	.	.	.
>LE01Gene10999	9.82911	9.89498	10.2281	11.9234	12.115	11.5441	1.88615	1.37e-13	1.72e-12	>LE01Gene10999	.	PF03446.14^NAD_binding_2^NAD binding domain of 6-phosphogluconate dehydrogenase^3-149^E:5.1e-07`PF07991.11^IlvN^Acetohydroxy acid isomeroreductase, NADPH-binding domain^3-84^E:9.5e-05`PF09130.10^DUF1932^Domain of unknown function (DUF1932)^204-270^E:4.9e-17	.	.	.	GO:0050661^molecular_function^NADP binding
>LE01Gene09926	6.1672	4.90251	5.05659	6.44439	8.2177	6.73278	1.88595	0.00086166	0.00206949	>LE01Gene09926	.	.	.	.	.	.
>LE01Gene10248	10.6331	10.6039	11.254	12.773	12.9051	12.5421	1.88558	1.08e-08	6.13e-08	>LE01Gene10248	BVMO_PARL1^BVMO_PARL1^Q:199-1782,H:15-541^51.6%ID^E:1.3e-166^RecName: Full=Baeyer-Villiger monooxygenase	.	.	.	.	.
>LE01Gene05302	10.4719	10.5117	10.9329	12.3875	12.1062	12.981	1.88509	4.82e-09	2.9e-08	>LE01Gene05302	AMDS_EMENI^AMDS_EMENI^Q:205-1827,H:26-544^34.1%ID^E:1e-66^RecName: Full=Acetamidase	PF01425.20^Amidase^Amidase^94-576^E:1.3e-105	.	KEGG:ani:AN8777.2`KO:K01426	GO:0004040^molecular_function^amidase activity`GO:0043864^molecular_function^indoleacetamide hydrolase activity`GO:0034251^biological_process^regulation of cellular amide catabolic process	.
>LE01Gene01116	7.20537	6.95821	7.5671	9.50792	9.01694	8.81149	1.88462	8.58e-10	5.79e-09	>LE01Gene01116	EFM4_SCHPO^EFM4_SCHPO^Q:100-774,H:7-230^42.8%ID^E:2e-45^RecName: Full=Protein-lysine N-methyltransferase efm4 {ECO:0000255|HAMAP-Rule:MF_03188}	PF13847.5^Methyltransf_31^Methyltransferase domain^85-235^E:9.5e-16`PF08242.11^Methyltransf_12^Methyltransferase domain^89-208^E:4.1e-07	.	KEGG:spo:SPBC839.14c	GO:0005829^cellular_component^cytosol`GO:0005634^cellular_component^nucleus`GO:0016279^molecular_function^protein-lysine N-methyltransferase activity`GO:2000765^biological_process^regulation of cytoplasmic translation	.
>LE01Gene01963	9.93591	10.3823	10.5302	12.618	11.9302	11.8926	1.88399	7.59e-11	6.05e-10	>LE01Gene01963	SYIC_SCHPO^SYIC_SCHPO^Q:66-3266,H:1-1063^60.4%ID^E:0^RecName: Full=Isoleucine--tRNA ligase, cytoplasmic	PF00133.21^tRNA-synt_1^tRNA synthetases class I (I, L, M and V)^21-643^E:8.3e-219`PF08264.12^Anticodon_1^Anticodon-binding domain of tRNA^698-851^E:3.2e-24	.	KEGG:spo:SPBC8D2.06`KO:K01870	GO:0005737^cellular_component^cytoplasm`GO:0005829^cellular_component^cytosol`GO:0002161^molecular_function^aminoacyl-tRNA editing activity`GO:0005524^molecular_function^ATP binding`GO:0004822^molecular_function^isoleucine-tRNA ligase activity`GO:0000049^molecular_function^tRNA binding`GO:0002181^biological_process^cytoplasmic translation`GO:0006428^biological_process^isoleucyl-tRNA aminoacylation	GO:0000166^molecular_function^nucleotide binding`GO:0004812^molecular_function^aminoacyl-tRNA ligase activity`GO:0005524^molecular_function^ATP binding`GO:0006418^biological_process^tRNA aminoacylation for protein translation
>LE01Gene07518	9.12715	9.45443	9.63645	11.553	11.2956	11.0096	1.8836	7.38e-12	6.9e-11	>LE01Gene07518	.	.	.	.	.	.
>LE01Gene06482	6.29754	6.92427	5.89501	8.09433	9.01154	7.32255	1.8827	6.98e-05	0.000206437	>LE01Gene06482	.	.	.	.	.	.
>LE01Gene04142	7.84608	7.9524	8.32995	9.22625	9.59647	10.6137	1.88234	6.17e-08	3.07e-07	>LE01Gene04142	ALYA_KLEPN^ALYA_KLEPN^Q:359-634,H:15-99^39.4%ID^E:3.1e-05^RecName: Full=Alginate lyase	PF08787.10^Alginate_lyase2^Alginate lyase^41-253^E:2.1e-42	.	.	.	.
>LE01Gene07774	7.86423	8.33904	8.35239	10.208	10.0475	9.97297	1.88091	6.35e-13	7.08e-12	>LE01Gene07774	TRM44_SCHPO^TRM44_SCHPO^Q:184-1626,H:8-458^32%ID^E:4.7e-67^RecName: Full=tRNA (uracil-O(2)-)-methyltransferase	PF07757.12^AdoMet_MTase^Predicted AdoMet-dependent methyltransferase^217-344^E:2.2e-33	ENOG410YQ45^tRNA methyltransferase 44 homolog (S. cerevisiae)	KEGG:fgr:FGSG_08879`KO:K15447	GO:0005737^cellular_component^cytoplasm`GO:0008168^molecular_function^methyltransferase activity`GO:0008033^biological_process^tRNA processing	GO:0008168^molecular_function^methyltransferase activity
>LE01Gene07850	7.94601	8.77957	8.51637	9.39415	10.9808	10.1913	1.87923	1.77e-06	7.03e-06	>LE01Gene07850	EXG3_SCHPO^EXG3_SCHPO^Q:109-1578,H:4-448^30%ID^E:1.6e-58^RecName: Full=Glucan 1,3-beta-glucosidase 3	PF00150.17^Cellulase^Cellulase (glycosyl hydrolase family 5)^111-391^E:3.3e-17	.	KEGG:spo:SPBC2D10.05	GO:1990819^cellular_component^actin fusion focus`GO:0009986^cellular_component^cell surface`GO:0005737^cellular_component^cytoplasm`GO:0005829^cellular_component^cytosol`GO:0005576^cellular_component^extracellular region`GO:0005634^cellular_component^nucleus`GO:0046557^molecular_function^glucan endo-1,6-beta-glucosidase activity`GO:0004338^molecular_function^glucan exo-1,3-beta-glucosidase activi…	GO:0004553^molecular_function^hydrolase activity, hydrolyzing O-glycosyl compounds`GO:0005975^biological_process^carbohydrate metabolic process
>LE01Gene07094	10.9258	10.264	10.6218	12.7226	12.6355	12.0815	1.8782	2.61e-08	1.38e-07	>LE01Gene07094	RST2_SCHPO^RST2_SCHPO^Q:814-1044,H:50-129^34.1%ID^E:0.00046^RecName: Full=Zinc finger protein rst2	.	.	.	.	.
>LE01Gene10535	8.83989	8.73132	7.91942	10.5162	10.8456	9.67055	1.87491	2.51e-05	8.08e-05	>LE01Gene10535	.	.	.	.	.	.
>LE01Gene09805	7.87022	8.90957	8.8486	10.4598	10.6408	10.3402	1.8738	2.97e-08	1.56e-07	>LE01Gene09805	H4_AGABI^H4_AGABI^Q:113-391,H:11-103^74.2%ID^E:7.8e-32^RecName: Full=Histone H4	.	.	.	GO:0000786^cellular_component^nucleosome`GO:0005634^cellular_component^nucleus`GO:0003677^molecular_function^DNA binding`GO:0046982^molecular_function^protein heterodimerization activity`GO:0006334^biological_process^nucleosome assembly	.
>LE01Gene13625	8.75167	7.94113	8.01253	9.6356	10.659	9.97297	1.87303	5.35e-09	3.19e-08	>LE01Gene13625	YJU6_YEAST^YJU6_YEAST^Q:865-1842,H:201-539^21.6%ID^E:1.3e-15^RecName: Full=Putative transcriptional regulatory protein YJL206C	PF04082.17^Fungal_trans^Fungal specific transcription factor domain^278-533^E:1.2e-28	.	KEGG:afm:AFUA_1G03860`KO:K09244	GO:0005634^cellular_component^nucleus`GO:0003677^molecular_function^DNA binding`GO:0000981^molecular_function^DNA-binding transcription factor activity, RNA polymerase II-specific`GO:0008270^molecular_function^zinc ion binding`GO:0006351^biological_process^transcription, DNA-templated	GO:0003677^molecular_function^DNA binding`GO:0008270^molecular_function^zinc ion binding`GO:0006351^biological_process^transcription, DNA-templated`GO:0005634^cellular_component^nucleus
>LE01Gene12083	9.02601	9.18983	9.58999	11.5824	10.9072	10.8693	1.87189	1.86e-11	1.63e-10	>LE01Gene12083	LKHA4_AJECN^LKHA4_AJECN^Q:36-1877,H:16-617^37.8%ID^E:3.4e-121^RecName: Full=Leucine aminopeptidase 2	PF01433.19^Peptidase_M1^Peptidase family M1 domain^226-428^E:4.1e-38`PF09127.10^Leuk-A4-hydro_C^Leukotriene A4 hydrolase, C-terminal^496-617^E:4.3e-34	COG0308^aminopeptidase	KEGG:aje:HCAG_07440`KO:K01254	GO:0000328^cellular_component^fungal-type vacuole lumen`GO:0005771^cellular_component^multivesicular body`GO:0005634^cellular_component^nucleus`GO:0061957^cellular_component^NVT complex`GO:0004177^molecular_function^aminopeptidase activity`GO:0004301^molecular_function^epoxide hydrolase activity`GO:0008237^molecular_function^metallopeptidase activity`GO:0008270^molecular_function^zinc ion binding…	GO:0008237^molecular_function^metallopeptidase activity`GO:0008270^molecular_function^zinc ion binding
>LE01Gene10188	5.28017	5.26985	4.65594	7.99729	6.41075	4.74539	1.87135	0.00280741	0.00603668	>LE01Gene10188	FAR10_YEAST^FAR10_YEAST^Q:92-409,H:85-192^34.5%ID^E:0.00089^RecName: Full=Factor arrest protein 10	.	.	.	.	.
>LE01Gene11524	9.23567	9.18027	9.67078	11.2694	11.098	11.3636	1.87019	4.05e-25	2.57e-23	>LE01Gene11524	HST2_SCHPO^HST2_SCHPO^Q:182-1084,H:37-331^49.7%ID^E:2.2e-76^RecName: Full=NAD-dependent protein deacetylase hst2	PF02146.16^SIR2^Sir2 family^2-109^E:6.3e-31	.	KEGG:ani:AN8450.2	GO:0005634^cellular_component^nucleus`GO:0016787^molecular_function^hydrolase activity`GO:0046872^molecular_function^metal ion binding`GO:0070403^molecular_function^NAD+ binding`GO:0006355^biological_process^regulation of transcription, DNA-templated`GO:0006351^biological_process^transcription, DNA-templated	GO:0070403^molecular_function^NAD+ binding
>LE01Gene11971	5.31577	6.39013	5.62703	7.45928	8.27284	7.1232	1.86939	1.53e-05	5.12e-05	>LE01Gene11971	.	PF00646.32^F-box^F-box domain^327-364^E:1.4e-06`PF12937.6^F-box-like^F-box-like^329-365^E:1.7e-05	.	.	.	GO:0005515^molecular_function^protein binding
>LE01Gene13684	7.95732	8.02358	8.24136	10.11	10.0369	9.64472	1.86936	1.05e-07	5.06e-07	>LE01Gene13684	RGXB_ASPNC^RGXB_ASPNC^Q:38-1276,H:1-416^43.2%ID^E:2.1e-95^RecName: Full=Alpha-L-rhamnosidase rgxB	PF00295.16^Glyco_hydro_28^Glycosyl hydrolases family 28^133-418^E:2.2e-39	.	KEGG:ang:ANI_1_1122034	GO:0005576^cellular_component^extracellular region`GO:0030596^molecular_function^alpha-L-rhamnosidase activity`GO:0004650^molecular_function^polygalacturonase activity`GO:0071555^biological_process^cell wall organization`GO:0000272^biological_process^polysaccharide catabolic process	GO:0004650^molecular_function^polygalacturonase activity`GO:0005975^biological_process^carbohydrate metabolic process
>LE01Gene03047	8.49255	8.41432	9.00691	9.74662	10.9557	10.6317	1.86865	8.81e-10	5.93e-09	>LE01Gene03047	.	PF11710.7^Git3^G protein-coupled glucose receptor regulating Gpa2^30-205^E:1.4e-05	.	.	.	.
>LE01Gene00394	10.3355	10.3475	10.1987	12.1209	12.4758	11.8165	1.86834	3.81e-15	6.22e-14	>LE01Gene00394	OYEC_SCHPO^OYEC_SCHPO^Q:99-1298,H:1-387^45.8%ID^E:1.8e-92^RecName: Full=Putative NADPH dehydrogenase C23G7.10c	PF00724.19^Oxidored_FMN^NADH:flavin oxidoreductase / NADH oxidase family^35-386^E:1.1e-59	.	KEGG:spo:SPBC23G7.10c	GO:0005829^cellular_component^cytosol`GO:0005634^cellular_component^nucleus`GO:0010181^molecular_function^FMN binding`GO:0003959^molecular_function^NADPH dehydrogenase activity`GO:0018548^molecular_function^pentaerythritol trinitrate reductase activity`GO:0052690^molecular_function^trichloro-p-hydroquinone reductive dehalogenase activity	GO:0010181^molecular_function^FMN binding`GO:0016491^molecular_function^oxidoreductase activity`GO:0055114^biological_process^oxidation-reduction process
>LE01Gene13151	3.76761	4.03722	4.71254	5.83653	6.39427	5.80076	1.86767	0.000155015	0.000427627	>LE01Gene13151	.	PF01476.19^LysM^LysM domain^132-171^E:9.9e-08`PF01476.19^LysM^LysM domain^181-226^E:4.5e-07	.	.	.	.
>LE01Gene12607	9.79009	9.68809	10.0349	11.3885	11.148	12.3191	1.86732	7.49e-11	5.98e-10	>LE01Gene12607	ATR1_STAC4^ATR1_STAC4^Q:138-698,H:2-197^25.1%ID^E:0.00032^RecName: Full=Core atranone cluster (CAC) protein 1 {ECO:0000303|PubMed:25015739}	.	.	.	.	.
>LE01Gene11865	6.51221	6.70195	6.2792	8.48562	8.45472	8.12337	1.86678	1.24e-23	6.4e-22	>LE01Gene11865	.	.	.	.	.	.
>LE01Gene13508	8.29268	8.07088	8.07862	9.23747	10.2431	10.3286	1.8662	4.85e-07	2.09e-06	>LE01Gene13508	PAPI_STRMB^PAPI_STRMB^Q:291-665,H:13-141^27.1%ID^E:3.5e-05^RecName: Full=Papain inhibitor {ECO:0000303|PubMed:21715969}	.	.	.	.	.
>LE01Gene01161	8.92591	9.17066	9.25811	10.8089	11.294	10.8066	1.86561	4.29e-10	3.06e-09	>LE01Gene01161	FSL4_GIBZE^FSL4_GIBZE^Q:613-2127,H:29-516^23.6%ID^E:2.7e-37^RecName: Full=Cytochrome P450 monooxygenase FSL4 {ECO:0000303|PubMed:22252016}	PF00067.21^p450^Cytochrome P450^62-528^E:1.2e-70	.	KEGG:fvr:FVEG_14636	GO:0020037^molecular_function^heme binding`GO:0005506^molecular_function^iron ion binding`GO:0004497^molecular_function^monooxygenase activity`GO:0016705^molecular_function^oxidoreductase activity, acting on paired donors, with incorporation or reduction of molecular oxygen	GO:0005506^molecular_function^iron ion binding`GO:0016705^molecular_function^oxidoreductase activity, acting on paired donors, with incorporation or reduction of molecular oxygen`GO:0020037^molecular_function^heme binding`GO:0055114^biological_process^oxidation-reduction process
>LE01Gene06516	8.81212	9.20168	8.89214	10.2149	11.159	10.9877	1.86511	5.68e-08	2.85e-07	>LE01Gene06516	YG64_SCHPO^YG64_SCHPO^Q:1044-2456,H:23-532^35.2%ID^E:8.3e-72^RecName: Full=Uncharacterized amino-acid permease C15C4.04c	PF13520.5^AA_permease_2^Amino acid permease^44-176^E:1.6e-08`PF13520.5^AA_permease_2^Amino acid permease^166-281^E:2e-10`PF13520.5^AA_permease_2^Amino acid permease^332-464^E:1.3e-08`PF00324.20^AA_permease^Amino acid permease^439-724^E:8.6e-07`PF13520.5^AA_permease_2^Amino acid permease^453-733^E:3.6e-37	.	KEGG:spo:SPBC15C4.04c	GO:0032153^cellular_component^cell division site`GO:0051286^cellular_component^cell tip`GO:0005794^cellular_component^Golgi apparatus`GO:0005887^cellular_component^integral component of plasma membrane`GO:0015171^molecular_function^amino acid transmembrane transporter activity`GO:0015297^molecular_function^antiporter activity`GO:0015179^molecular_function^L-amino acid transmembrane transporter ac…	GO:0022857^molecular_function^transmembrane transporter activity`GO:0055085^biological_process^transmembrane transport`GO:0016020^cellular_component^membrane
>LE01Gene07304	5.93512	5.85436	5.74026	7.43608	7.98437	7.60107	1.865	8.26e-10	5.6e-09	>LE01Gene07304	.	.	.	.	.	.
>LE01Gene03303	9.31916	8.56509	9.32544	11.413	10.7773	10.6003	1.86481	3.48e-06	1.31e-05	>LE01Gene03303	3BHDP_RUMGV^3BHDP_RUMGV^Q:28-567,H:13-190^35.9%ID^E:3.4e-21^RecName: Full=3-beta-hydroxycholanate 3-dehydrogenase (NADP(+)) {ECO:0000303|PubMed:26192599}	PF00106.24^adh_short^short chain dehydrogenase^11-199^E:1.9e-46`PF08659.9^KR^KR domain^13-116^E:6e-08`PF01370.20^Epimerase^NAD dependent epimerase/dehydratase family^14-130^E:5.8e-05`PF13561.5^adh_short_C2^Enoyl-(Acyl carrier protein) reductase^17-233^E:4.7e-35`PF08643.9^DUF1776^Fungal family of unknown function (DUF1776)^101-193^E:0.00021	ENOG410XNW1^)-reductase	KEGG:bsu:BSU15910`KO:K00059	GO:0102131^molecular_function^3-oxo-glutaryl-[acp] methyl ester reductase activity`GO:0102132^molecular_function^3-oxo-pimeloyl-[acp] methyl ester reductase activity`GO:0004316^molecular_function^3-oxoacyl-[acyl-carrier-protein] reductase (NADPH) activity`GO:0051287^molecular_function^NAD binding`GO:0006633^biological_process^fatty acid biosynthetic process	GO:0003824^molecular_function^catalytic activity`GO:0050662^molecular_function^coenzyme binding
>LE01Gene12415	8.51569	8.58332	8.6419	10.4298	10.9911	9.56236	1.86276	9.31e-07	3.85e-06	>LE01Gene12415	.	.	.	.	.	.
>LE01Gene02832	7.80283	7.56155	8.63093	10.2662	9.8607	9.58582	1.86155	2.67e-07	1.21e-06	>LE01Gene02832	URM1_LACBS^URM1_LACBS^Q:7-354,H:7-122^68.1%ID^E:1.9e-41^RecName: Full=Ubiquitin-related modifier 1 {ECO:0000255|HAMAP-Rule:MF_03048}	PF09138.10^Urm1^Urm1 (Ubiquitin related modifier)^6-118^E:2.6e-31`PF02597.19^ThiS^ThiS family^60-118^E:8e-05	COG5131^tRNA thio-modification	KEGG:lbc:LACBIDRAFT_184088`KO:K12161	GO:0005737^cellular_component^cytoplasm`GO:0034227^biological_process^tRNA thio-modification	GO:0034227^biological_process^tRNA thio-modification`GO:0005737^cellular_component^cytoplasm
>LE01Gene03997	7.39203	7.77969	7.16224	8.99446	10.1394	8.10725	1.85561	4.29e-05	0.000132162	>LE01Gene03997	.	.	.	.	.	.
>LE01Gene05506	6.6158	6.33953	6.52024	8.36797	8.44274	8.19631	1.85496	3.14e-13	3.7e-12	>LE01Gene05506	.	.	.	.	.	.
>LE01Gene10604	7.96855	8.17556	8.61617	10.2183	10.0034	10.1604	1.85489	2.24e-21	8.65e-20	>LE01Gene10604	.	.	.	.	.	.
>LE01Gene07610	8.19092	7.43872	9.08402	10.0348	10.5159	10.1355	1.85446	1.55e-05	5.19e-05	>LE01Gene07610	YQK1_SCHPO^YQK1_SCHPO^Q:313-1212,H:23-286^31.4%ID^E:2.4e-25^RecName: Full=UPF0676 protein C1494.01	PF14226.5^DIOX_N^non-haem dioxygenase in morphine synthesis N-terminal^31-116^E:1e-12`PF03171.19^2OG-FeII_Oxy^2OG-Fe(II) oxygenase superfamily^242-319^E:4.1e-09	.	KEGG:rso:RSp1529`KO:K21815	GO:0102276^molecular_function^2-oxoglutarate oxygenase/decarboxylase (ethylene-forming) activity`GO:0051213^molecular_function^dioxygenase activity`GO:0046872^molecular_function^metal ion binding`GO:0009693^biological_process^ethylene biosynthetic process	GO:0016491^molecular_function^oxidoreductase activity`GO:0055114^biological_process^oxidation-reduction process
>LE01Gene06926	6.94618	7.32193	6.98976	8.11395	9.41435	9.01242	1.85359	3.22e-09	1.98e-08	>LE01Gene06926	QOR2_ECOLI^QOR2_ECOLI^Q:22-777,H:2-229^30.8%ID^E:1.6e-18^RecName: Full=Quinone oxidoreductase 2	PF05368.12^NmrA^NmrA-like family^8-248^E:1.6e-13`PF13460.5^NAD_binding_10^NAD(P)H-binding^13-156^E:2.6e-11	.	.	.	.
>LE01Gene10170	12.3281	12.3576	12.544	14.0696	14.4238	14.283	1.85319	1.08e-07	5.21e-07	>LE01Gene10170	.	.	.	.	.	.
>LE01Gene06514	11.3996	11.2308	12.1444	13.7427	13.7656	12.8039	1.85291	1.53e-05	5.11e-05	>LE01Gene06514	SPEB1_SCHPO^SPEB1_SCHPO^Q:173-1267,H:44-390^61.6%ID^E:1.7e-129^RecName: Full=Putative agmatinase 1	PF00491.20^Arginase^Arginase family^90-405^E:3.7e-85	.	KEGG:spo:SPAC11D3.09`KO:K01480	GO:0005783^cellular_component^endoplasmic reticulum`GO:0008783^molecular_function^agmatinase activity`GO:0046872^molecular_function^metal ion binding`GO:0006520^biological_process^cellular amino acid metabolic process	GO:0046872^molecular_function^metal ion binding
>LE01Gene07753	9.21932	9.42642	9.6779	10.9147	11.0047	11.8149	1.85257	5.53e-05	0.000166935	>LE01Gene07753	XPTC_EMENI^XPTC_EMENI^Q:103-1944,H:25-613^29.3%ID^E:1.5e-47^RecName: Full=Dehydrogenase xptC {ECO:0000303|PubMed:21351751}	PF05199.12^GMC_oxred_C^GMC oxidoreductase^63-204^E:3.9e-25	.	KEGG:ani:AN7998.2	GO:0050660^molecular_function^flavin adenine dinucleotide binding`GO:0016614^molecular_function^oxidoreductase activity, acting on CH-OH group of donors`GO:1900793^biological_process^shamixanthone biosynthetic process	GO:0016614^molecular_function^oxidoreductase activity, acting on CH-OH group of donors`GO:0055114^biological_process^oxidation-reduction process
>LE01Gene10301	7.68528	7.48601	7.61985	9.32427	9.73871	9.21907	1.85135	6.44e-09	3.77e-08	>LE01Gene10301	AIM2_YEAST^AIM2_YEAST^Q:68-778,H:10-243^36.5%ID^E:1.1e-36^RecName: Full=Protein AIM2	PF01738.17^DLH^Dienelactone hydrolase family^44-259^E:2.7e-16	.	.	.	GO:0016787^molecular_function^hydrolase activity
>LE01Gene09773	8.21939	8.28212	8.16735	10.2	10.1344	9.85403	1.85027	9.93e-11	7.78e-10	>LE01Gene09773	EFM7_CANAL^EFM7_CANAL^Q:181-717,H:53-231^31.2%ID^E:3.4e-15^RecName: Full=Protein N-terminal and lysine N-methyltransferase EFM7 {ECO:0000255|HAMAP-Rule:MF_03223}	PF10294.8^Methyltransf_16^Lysine methyltransferase^63-213^E:8.4e-19	.	KEGG:spo:SPAC8F11.09c`KO:K17878	GO:0005829^cellular_component^cytosol`GO:0008112^molecular_function^nicotinamide N-methyltransferase activity`GO:0006769^biological_process^nicotinamide metabolic process	.
>LE01Gene12137	7.91733	8.09141	8.67789	10.1966	10.0929	10.0453	1.84992	3.16e-11	2.67e-10	>LE01Gene12137	.	.	.	.	.	.
>LE01Gene04720	13.3136	13.0373	13.7482	15.6659	14.9167	15.0374	1.84924	3.19e-08	1.66e-07	>LE01Gene04720	ENO_NEOFR^ENO_NEOFR^Q:121-1407,H:1-430^74.7%ID^E:2.9e-181^RecName: Full=Enolase	PF03952.15^Enolase_N^Enolase, N-terminal domain^3-134^E:1.6e-59`PF00113.21^Enolase_C^Enolase, C-terminal TIM barrel domain^144-430^E:1.1e-143	.	.	GO:0000015^cellular_component^phosphopyruvate hydratase complex`GO:0000287^molecular_function^magnesium ion binding`GO:0004634^molecular_function^phosphopyruvate hydratase activity`GO:0006096^biological_process^glycolytic process	.
>LE01Gene06027	8.50802	8.60491	8.32995	9.75758	10.9245	10.0439	1.84864	1.14e-07	5.46e-07	>LE01Gene06027	AUSD_EMENI^AUSD_EMENI^Q:162-851,H:48-242^28.4%ID^E:4.6e-21^RecName: Full=Methyltransferase ausD {ECO:0000303|PubMed:22329759}	.	.	.	.	.
>LE01Gene06635	5.6859	6.93568	6.76735	7.33101	8.86972	8.57408	1.8472	0.000236754	0.00063266	>LE01Gene06635	.	.	.	.	.	.
>LE01Gene12442	8.53092	9.79681	9.41557	10.2771	11.6611	11.2875	1.84685	2.82e-06	1.08e-05	>LE01Gene12442	CMC4_YEAS1^CMC4_YEAS1^Q:48-230,H:3-64^45.2%ID^E:1.8e-08^RecName: Full=Cx9C motif-containing protein 4, mitochondrial	.	.	.	.	.
>LE01Gene07029	9.13465	8.97181	9.77245	11.1733	11.1669	11.2015	1.84658	2.64e-14	3.74e-13	>LE01Gene07029	.	PF10021.8^DUF2263^Uncharacterized protein conserved in bacteria (DUF2263)^26-153^E:5.9e-16	.	.	.	.
>LE01Gene09437	8.57932	8.10662	9.11322	10.243	10.0182	11.0318	1.84393	5.85e-10	4.07e-09	>LE01Gene09437	APDF_EMENI^APDF_EMENI^Q:139-1407,H:2-413^32.5%ID^E:2.4e-53^RecName: Full=Aspyridones efflux protein apdF {ECO:0000303|PubMed:17369821}	.	.	.	.	.
>LE01Gene05757	10.357	10.4484	10.713	12.0205	12.4684	12.5288	1.84294	1.59e-24	9.32e-23	>LE01Gene05757	YIQ6_YEAST^YIQ6_YEAST^Q:577-2013,H:59-540^29%ID^E:2.3e-67^RecName: Full=Uncharacterized transporter YIL166C	PF07690.15^MFS_1^Major Facilitator Superfamily^88-462^E:1.5e-19	.	KEGG:spo:SPAC1002.16c	GO:0032153^cellular_component^cell division site`GO:0051286^cellular_component^cell tip`GO:0005794^cellular_component^Golgi apparatus`GO:0016021^cellular_component^integral component of membrane`GO:0046943^molecular_function^carboxylic acid transmembrane transporter activity`GO:1905039^biological_process^carboxylic acid transmembrane transport	GO:0055085^biological_process^transmembrane transport`GO:0016021^cellular_component^integral component of membrane
>LE01Gene02688	8.30158	7.8893	6.72671	9.65415	9.80256	9.35499	1.84185	3.16e-08	1.65e-07	>LE01Gene02688	WOR1_GIBF5^WOR1_GIBF5^Q:430-1023,H:9-224^37%ID^E:7.3e-33^RecName: Full=Global transcription regulator sge1 {ECO:0000305}	PF09729.8^Gti1_Pac2^Gti1/Pac2 family^13-166^E:1.7e-48	.	.	GO:0005634^cellular_component^nucleus`GO:0006355^biological_process^regulation of transcription, DNA-templated`GO:0006351^biological_process^transcription, DNA-templated	.
>LE01Gene13371	10.2937	10.4613	11.1067	10.991	10.8235	13.7313	1.84153	0.000784092	0.00189907	>LE01Gene13371	I23O1_RAT^I23O1_RAT^Q:766-1821,H:32-369^26.3%ID^E:4.2e-19^RecName: Full=Indoleamine 2,3-dioxygenase 1	.	.	.	.	.
>LE01Gene06391	9.73034	9.79681	10.0542	11.9946	11.5901	11.4829	1.84043	9.06e-19	2.46e-17	>LE01Gene06391	HPCH_ECOLC^HPCH_ECOLC^Q:5-523,H:83-258^38.5%ID^E:6.6e-16^RecName: Full=4-hydroxy-2-oxo-heptane-1,7-dioate aldolase {ECO:0000255|HAMAP-Rule:MF_01292}	PF03328.13^HpcH_HpaI^HpcH/HpaI aldolase/citrate lyase family^2-154^E:1.5e-20	COG3836^Aldolase	KEGG:ecl:EcolC_3707`KO:K02510	GO:0018802^molecular_function^2,4-dihydroxyhept-2-ene-1,7-dioate aldolase activity`GO:0046872^molecular_function^metal ion binding`GO:0010124^biological_process^phenylacetate catabolic process	GO:0003824^molecular_function^catalytic activity
>LE01Gene04064	7.26121	7.91256	7.83907	9.70356	9.65817	9.1785	1.83852	2.29e-08	1.23e-07	>LE01Gene04064	.	.	.	.	.	.
>LE01Gene05088	7.97413	6.675	7.64914	9.67412	9.69564	8.35036	1.83709	0.000105324	0.00030062	>LE01Gene05088	COX1_COPC7^COX1_COPC7^Q:22-1359,H:8-460^33.3%ID^E:3.9e-65^RecName: Full=Cytochrome P450 monooxygenase COX1 {ECO:0000303|PubMed:19400802}	PF00067.21^p450^Cytochrome P450^65-375^E:6.3e-34	COG2124^Cytochrome p450	KEGG:cci:CC1G_03562	GO:0016021^cellular_component^integral component of membrane`GO:0020037^molecular_function^heme binding`GO:0005506^molecular_function^iron ion binding`GO:0004497^molecular_function^monooxygenase activity`GO:0016705^molecular_function^oxidoreductase activity, acting on paired donors, with incorporation or reduction of molecular oxygen	GO:0005506^molecular_function^iron ion binding`GO:0016705^molecular_function^oxidoreductase activity, acting on paired donors, with incorporation or reduction of molecular oxygen`GO:0020037^molecular_function^heme binding`GO:0055114^biological_process^oxidation-reduction process
>LE01Gene07175	8.00171	8.25962	8.40056	10.1687	9.92665	10.0829	1.83661	2.25e-18	5.72e-17	>LE01Gene07175	CSRP3_MOUSE^CSRP3_MOUSE^Q:861-1100,H:101-183^45.8%ID^E:2.9e-14^RecName: Full=Cysteine and glycine-rich protein 3	PF00412.21^LIM^LIM domain^36-74^E:1.4e-08`PF00412.21^LIM^LIM domain^255-310^E:6.8e-12	ENOG410Z840^Cysteine and glycine-rich protein 3 (Cardiac LIM protein)	KEGG:dme:Dmel_CG1019	GO:0005634^cellular_component^nucleus`GO:0030018^cellular_component^Z disc`GO:0046872^molecular_function^metal ion binding`GO:0008307^molecular_function^structural constituent of muscle`GO:0007517^biological_process^muscle organ development`GO:0060537^biological_process^muscle tissue development`GO:0090175^biological_process^regulation of establishment of planar polarity`GO:0045214^biological_pro…	.
>LE01Gene01347	9.17155	9.51078	9.16484	10.9743	11.3984	10.9588	1.83526	2.46e-16	4.75e-15	>LE01Gene01347	FUM15_GIBM7^FUM15_GIBM7^Q:1259-2743,H:54-559^25.6%ID^E:1e-45^RecName: Full=Cytochrome P450 monooxygenase FUM15 {ECO:0000303|PubMed:12620260}	PF00067.21^p450^Cytochrome P450^77-546^E:5.1e-64	.	KEGG:fvr:FVEG_14636	GO:0020037^molecular_function^heme binding`GO:0005506^molecular_function^iron ion binding`GO:0004497^molecular_function^monooxygenase activity`GO:0016705^molecular_function^oxidoreductase activity, acting on paired donors, with incorporation or reduction of molecular oxygen	GO:0005506^molecular_function^iron ion binding`GO:0016705^molecular_function^oxidoreductase activity, acting on paired donors, with incorporation or reduction of molecular oxygen`GO:0020037^molecular_function^heme binding`GO:0055114^biological_process^oxidation-reduction process
>LE01Gene10919	8.92878	9.65399	9.81992	11.438	11.5296	11.0311	1.83391	5.5e-07	2.36e-06	>LE01Gene10919	.	.	.	.	.	.
>LE01Gene04555	6.93478	6.87775	6.26034	8.84981	8.71242	7.90451	1.83311	2.3e-09	1.44e-08	>LE01Gene04555	.	.	.	.	.	.
>LE01Gene05846	11.4515	11.6088	10.6921	12.6582	13.4757	13.1538	1.83175	4.27e-09	2.59e-08	>LE01Gene05846	MTFA_ASPFC^MTFA_ASPFC^Q:1154-1468,H:206-304^33.3%ID^E:6.3e-05^RecName: Full=C2H2 finger domain transcription factor mtfA {ECO:0000305}	PF00096.25^zf-C2H2^Zinc finger, C2H2 type^175-197^E:3.7e-05`PF13912.5^zf-C2H2_6^C2H2-type zinc finger^175-197^E:0.0052`PF12874.6^zf-met^Zinc-finger of C2H2 type^177-197^E:0.0029`PF00096.25^zf-C2H2^Zinc finger, C2H2 type^203-227^E:0.0005	.	.	.	GO:0003676^molecular_function^nucleic acid binding
>LE01Gene10156	5.98019	6.7544	7.15204	8.34324	9.08012	7.91071	1.83128	1.94e-06	7.65e-06	>LE01Gene10156	.	.	.	.	.	.
>LE01Gene08262	9.78534	9.42642	9.28402	11.359	11.6633	10.9093	1.83015	5.07e-11	4.16e-10	>LE01Gene08262	.	.	.	.	.	.
>LE01Gene13512	7.3668	7.23231	7.69902	8.97581	9.63556	9.11003	1.8293	0.000232538	0.000622675	>LE01Gene13512	HYES_PIG^HYES_PIG^Q:693-1595,H:259-548^26.6%ID^E:5.8e-24^RecName: Full=Bifunctional epoxide hydrolase 2	.	.	.	.	.
>LE01Gene01415	10.0631	10.1838	10.6032	12.0757	12.4824	11.7319	1.82781	1.35e-11	1.21e-10	>LE01Gene01415	AMT1_SCHPO^AMT1_SCHPO^Q:238-1638,H:28-476^51.8%ID^E:1.9e-131^RecName: Full=Ammonium transporter 1	PF00909.20^Ammonium_transp^Ammonium Transporter Family^31-455^E:4.6e-104	.	KEGG:spo:SPCPB1C11.01`KO:K03320	GO:0005794^cellular_component^Golgi apparatus`GO:0005887^cellular_component^integral component of plasma membrane`GO:0015398^molecular_function^high-affinity secondary active ammonium transmembrane transporter activity`GO:0072488^biological_process^ammonium transmembrane transport`GO:0001403^biological_process^invasive growth in response to glucose limitation	GO:0008519^molecular_function^ammonium transmembrane transporter activity`GO:0015696^biological_process^ammonium transport`GO:0016020^cellular_component^membrane
>LE01Gene12506	4.71365	4.70346	3.18111	5.85996	6.58061	5.82725	1.82749	0.00011649	0.000330233	>LE01Gene12506	SET5_SCHPO^SET5_SCHPO^Q:790-1254,H:99-269^30.4%ID^E:2.5e-10^RecName: Full=SET domain-containing protein 5	PF00856.27^SET^SET domain^74-236^E:6.2e-11	.	.	.	GO:0005515^molecular_function^protein binding
>LE01Gene00921	9.85656	9.22974	9.91795	11.8024	11.4856	11.2316	1.82708	1.25e-09	8.22e-09	>LE01Gene00921	SDS22_YEAST^SDS22_YEAST^Q:139-384,H:23-103^47%ID^E:2e-09^RecName: Full=Protein phosphatase 1 regulatory subunit SDS22	PF13855.5^LRR_8^Leucine rich repeat^64-120^E:3.4e-08`PF13855.5^LRR_8^Leucine rich repeat^84-143^E:1.3e-12`PF13306.5^LRR_5^Leucine rich repeats (6 copies)^94-169^E:0.055`PF13516.5^LRR_6^Leucine Rich repeat^106-124^E:0.25`PF13855.5^LRR_8^Leucine rich repeat^124-166^E:1.9e-07`PF13855.5^LRR_8^Leucine rich repeat^131-188^E:8.3e-09`PF12799.6^LRR_4^Leucine Rich repeats (2 copies)^176-215^E:1.8e-07`PF145…	COG4886^leucine Rich Repeat	KEGG:mmu:66385`KO:K17550	GO:0005694^cellular_component^chromosome`GO:0005634^cellular_component^nucleus`GO:0007059^biological_process^chromosome segregation`GO:0035307^biological_process^positive regulation of protein dephosphorylation	GO:0005515^molecular_function^protein binding
>LE01Gene07568	3.28342	4.34147	4.25985	5.99308	6.1012	5.08972	1.82597	0.000241952	0.000645224	>LE01Gene07568	.	PF00931.21^NB-ARC^NB-ARC domain^70-321^E:5.9e-06	.	.	.	GO:0043531^molecular_function^ADP binding
>LE01Gene00922	7.69207	8.0965	7.43036	10.0271	9.60724	8.91699	1.82548	1.11e-05	3.78e-05	>LE01Gene00922	CGPB_FUSSO^CGPB_FUSSO^Q:1699-1821,H:402-442^61%ID^E:2.6e-07^RecName: Full=Cutinase gene palindrome-binding protein	.	.	.	.	.
>LE01Gene13632	6.31524	6.28708	6.62716	8.45902	7.66524	8.4346	1.82446	1.25e-07	5.95e-07	>LE01Gene13632	.	.	.	.	.	.
>LE01Gene05579	10.0206	9.68809	10.1649	12.1939	11.4734	11.607	1.82311	2e-10	1.49e-09	>LE01Gene05579	PDX1_CERNC^PDX1_CERNC^Q:164-1078,H:44-343^74.1%ID^E:2.7e-118^RecName: Full=Pyridoxal 5'-phosphate synthase subunit PDX1	.	.	.	.	.
>LE01Gene06963	10.2075	9.61905	10.3095	12.1692	11.7805	11.6964	1.82236	1.1e-09	7.29e-09	>LE01Gene06963	NEDD8_DICDI^NEDD8_DICDI^Q:157-321,H:22-76^70.9%ID^E:2.4e-14^RecName: Full=NEDD8	.	COG5272^ubiquitin	KEGG:ddi:DDB_G0278711`KO:K12158	GO:0005829^cellular_component^cytosol`GO:0005634^cellular_component^nucleus`GO:0019005^cellular_component^SCF ubiquitin ligase complex`GO:0008283^biological_process^cell proliferation`GO:0045116^biological_process^protein neddylation`GO:0031647^biological_process^regulation of protein stability`GO:0030162^biological_process^regulation of proteolysis`GO:0051438^biological_process^regulation of ubi…	.
>LE01Gene00590	12.0942	11.6948	12.1415	13.6164	13.9519	13.8477	1.82206	1.92e-32	3.21e-30	>LE01Gene00590	.	.	.	.	.	.
[truncated: 2,729 more rows]

## Sheet: ow_3-VS-ow_1
Gene_id	ow_1_a	ow_1_b	ow_1_c	ow_3_a	ow_3_b	ow_3_c	log2FoldChange	pvalue	padj	id	sprot_Top_BLASTX_hit	Pfam	eggnog	Kegg	gene_ontology_blast	gene_ontology_pfam
>LE01Gene09110	0	0	0	9.74537	8.2012	5.60557	11.1124	7.45e-06	2.25e-05	>LE01Gene09110	.	.	.	.	.	.
[truncated: 4,354 more rows]

## Sheet: ow_3-VS-ow_2
Gene_id	ow_2_a	ow_2_b	ow_2_c	ow_3_a	ow_3_b	ow_3_c	log2FoldChange	pvalue	padj	id	sprot_Top_BLASTX_hit	Pfam	eggnog	Kegg	gene_ontology_blast	gene_ontology_pfam
>LE01Gene08737	0	0	0	0	10.0503	0	24.6975	1.57e-07	5.81e-05	>LE01Gene08737	.	.	.	.	.	.
[truncated: 126 more rows]

## Sheet: cs_2-VS-cs_1
Gene_id	cs_1_a	cs_1_b	cs_1_c	cs_2_a	cs_2_b	cs_2_c	log2FoldChange	pvalue	padj	id	sprot_Top_BLASTX_hit	Pfam	eggnog	Kegg	gene_ontology_blast	gene_ontology_pfam
[truncated: 3,399 more rows]

[truncated: 5 more sheets: cs_3-VS-cs_1 , cs_3-VS-cs_2, ow_1-VS-cs_1, ow_2-VS-cs_2, ow_3-VS-cs_3]
