# Supplementary material for: Comparative analysis of simulated in-situ colonization and degradation by Lentinula edodes on oak wafer and corn stalk
Source: Front Microbiol. 2023 Nov 23;14:1286064. doi: 10.3389/fmicb.2023.1286064 (PMC10701760; doi:10.3389/fmicb.2023.1286064)
Supplement: Supplementary file 3 [file Data_Sheet_3.XLSX]

## Sheet: ow_2-VS-ow_1
Up-regulated													Down-regulated
Class	GO_Name	GO_ID	GO_Level	P_value	EnrichmentScore	HitsGenesCountsInSelectedSet	HitsGenesCountsInBackground	AllGenesCountsInSelectedSet	AllGenesCountsInBackground	GenesOfSelectedSetInGOterm	corrected p-value(BH method)		Class	GO_Name	GO_ID	GO_Level	P_value	EnrichmentScore	HitsGenesCountsInSelectedSet	HitsGenesCountsInBackground	AllGenesCountsInSelectedSet	AllGenesCountsInBackground	GenesOfSelectedSetInGOterm	corrected p-value(BH method)
Molecular function	oxidoreductase activity, acting on paired donors, with incorporation or reduction of molecular oxygen	GO:0016705	4	0	2.48186	80	201	1116	6959	>LE01Gene05507,>LE01Gene01156,>LE01Gene13135,>LE01Gene01161,>LE01Gene04640,>LE01Gene08192,>LE01Gene11338,>LE01Gene04617,>LE01Gene11374,>LE01Gene05088,>LE01Gene05089,>LE01Gene09419,>LE01Gene13914,>LE01Gene11316,>LE01Gene09446,>LE01Gene06359,>LE01Gene06358,>LE01Gene11705,>LE01Gene05865,>LE01Gene06713,>LE01Gene05862,>LE01Gene05855,>LE01Gene04526,>LE01Gene07610,>LE01Gene02731,>LE01Gene00558,>LE01Gene…	0		Molecular function	structural molecule activity	GO:0005198	2	3.7e-14	3.1072	50	146	767	6959	>LE01Gene03323,>LE01Gene14438,>LE01Gene03363,>LE01Gene13539,>LE01Gene13506,>LE01Gene00242,>LE01Gene13552,>LE01Gene13554,>LE01Gene09889,>LE01Gene01960,>LE01Gene10826,>LE01Gene09867,>LE01Gene05499,>LE01Gene05411,>LE01Gene08921,>LE01Gene13881,>LE01Gene01434,>LE01Gene01435,>LE01Gene11238,>LE01Gene00147,>LE01Gene10309,>LE01Gene00960,>LE01Gene08487,>LE01Gene02296,>LE01Gene00911,>LE01Gene08401,>LE01Gene…	2.24e-11
Molecular function	catalytic activity	GO:0003824	2	0	1.39751	868	3873	1116	6959	>LE01Gene04653,>LE01Gene04657,>LE01Gene03325,>LE01Gene05983,>LE01Gene04654,>LE01Gene05507,>LE01Gene14458,>LE01Gene13129,>LE01Gene14459,>LE01Gene01150,>LE01Gene06846,>LE01Gene01156,>LE01Gene06847,>LE01Gene05516,>LE01Gene05518,>LE01Gene13132,>LE01Gene13135,>LE01Gene01161,>LE01Gene02451,>LE01Gene02456,>LE01Gene03303,>LE01Gene06818,>LE01Gene12251,>LE01Gene12252,>LE01Gene12253,>LE01Gene12254,>LE01Gene…	0		Molecular function	carbohydrate derivative binding	GO:0097367	3	4.76e-12	1.65717	160	876	767	6959	>LE01Gene06839,>LE01Gene01153,>LE01Gene02458,>LE01Gene03366,>LE01Gene03365,>LE01Gene05546,>LE01Gene02038,>LE01Gene06400,>LE01Gene02017,>LE01Gene03345,>LE01Gene01183,>LE01Gene01184,>LE01Gene10017,>LE01Gene09035,>LE01Gene00208,>LE01Gene12662,>LE01Gene10059,>LE01Gene06801,>LE01Gene10066,>LE01Gene10065,>LE01Gene02413,>LE01Gene01563,>LE01Gene10030,>LE01Gene11371,>LE01Gene09434,>LE01Gene08568,>LE01Gene…	1.44e-09
Molecular function	obsolete cofactor binding	GO:0048037	0	0	1.92429	158	512	1116	6959	>LE01Gene03325,>LE01Gene05507,>LE01Gene13129,>LE01Gene01156,>LE01Gene13135,>LE01Gene01161,>LE01Gene04649,>LE01Gene12264,>LE01Gene12266,>LE01Gene14012,>LE01Gene07739,>LE01Gene06854,>LE01Gene04205,>LE01Gene14008,>LE01Gene08192,>LE01Gene13513,>LE01Gene00256,>LE01Gene04617,>LE01Gene12238,>LE01Gene02892,>LE01Gene09060,>LE01Gene11374,>LE01Gene00628,>LE01Gene05088,>LE01Gene05089,>LE01Gene11722,>LE01Gene…	0		Molecular function	purine nucleotide binding	GO:0017076	6	4.97e-12	1.67736	154	833	767	6959	>LE01Gene06839,>LE01Gene01153,>LE01Gene02458,>LE01Gene03366,>LE01Gene03365,>LE01Gene05546,>LE01Gene02038,>LE01Gene06400,>LE01Gene02017,>LE01Gene03345,>LE01Gene01183,>LE01Gene01184,>LE01Gene10017,>LE01Gene09035,>LE01Gene00208,>LE01Gene12662,>LE01Gene10059,>LE01Gene06801,>LE01Gene10066,>LE01Gene10065,>LE01Gene02413,>LE01Gene01563,>LE01Gene10030,>LE01Gene11371,>LE01Gene08568,>LE01Gene08571,>LE01Gene…	1e-09
Molecular function	oxidoreductase activity	GO:0016491	3	1.11e-16	2.0294	289	888	1116	6959	>LE01Gene03325,>LE01Gene05507,>LE01Gene13129,>LE01Gene01156,>LE01Gene05518,>LE01Gene13135,>LE01Gene01161,>LE01Gene03303,>LE01Gene12251,>LE01Gene04640,>LE01Gene12264,>LE01Gene00290,>LE01Gene05541,>LE01Gene14012,>LE01Gene06854,>LE01Gene14008,>LE01Gene01552,>LE01Gene00225,>LE01Gene08192,>LE01Gene08198,>LE01Gene01526,>LE01Gene00683,>LE01Gene13513,>LE01Gene11338,>LE01Gene11339,>LE01Gene00256,>LE01Gene…	1.83e-14		Molecular function	purine ribonucleotide binding	GO:0032555	7	5.72e-12	1.68183	152	820	767	6959	>LE01Gene06839,>LE01Gene01153,>LE01Gene02458,>LE01Gene03366,>LE01Gene03365,>LE01Gene05546,>LE01Gene02038,>LE01Gene06400,>LE01Gene02017,>LE01Gene03345,>LE01Gene01183,>LE01Gene01184,>LE01Gene10017,>LE01Gene09035,>LE01Gene00208,>LE01Gene12662,>LE01Gene10059,>LE01Gene06801,>LE01Gene10066,>LE01Gene10065,>LE01Gene02413,>LE01Gene01563,>LE01Gene10030,>LE01Gene11371,>LE01Gene08568,>LE01Gene08571,>LE01Gene…	8.65e-10
Molecular function	iron ion binding	GO:0005506	7	3.21e-12	2.29203	68	185	1116	6959	>LE01Gene05507,>LE01Gene01156,>LE01Gene13135,>LE01Gene01161,>LE01Gene08192,>LE01Gene04617,>LE01Gene11374,>LE01Gene05088,>LE01Gene05089,>LE01Gene09419,>LE01Gene10455,>LE01Gene11316,>LE01Gene09446,>LE01Gene04116,>LE01Gene06359,>LE01Gene06358,>LE01Gene05865,>LE01Gene05862,>LE01Gene05855,>LE01Gene04526,>LE01Gene07610,>LE01Gene02731,>LE01Gene00558,>LE01Gene00557,>LE01Gene11694,>LE01Gene12580,>LE01Gene…	4.24e-10		Molecular function	purine ribonucleoside triphosphate binding	GO:0035639	5	6.45e-12	1.68308	151	814	767	6959	>LE01Gene06839,>LE01Gene01153,>LE01Gene02458,>LE01Gene03366,>LE01Gene03365,>LE01Gene05546,>LE01Gene02038,>LE01Gene06400,>LE01Gene02017,>LE01Gene03345,>LE01Gene01183,>LE01Gene01184,>LE01Gene10017,>LE01Gene09035,>LE01Gene00208,>LE01Gene12662,>LE01Gene10059,>LE01Gene06801,>LE01Gene10066,>LE01Gene10065,>LE01Gene02413,>LE01Gene01563,>LE01Gene10030,>LE01Gene11371,>LE01Gene08568,>LE01Gene08571,>LE01Gene…	7.8e-10
Molecular function	heme binding	GO:0020037	5	2.11e-10	2.15595	65	188	1116	6959	>LE01Gene05507,>LE01Gene01156,>LE01Gene13135,>LE01Gene01161,>LE01Gene08192,>LE01Gene04617,>LE01Gene09060,>LE01Gene11374,>LE01Gene05088,>LE01Gene05089,>LE01Gene09419,>LE01Gene11316,>LE01Gene09446,>LE01Gene06359,>LE01Gene06358,>LE01Gene04157,>LE01Gene08997,>LE01Gene04526,>LE01Gene02731,>LE01Gene00558,>LE01Gene00557,>LE01Gene12580,>LE01Gene00976,>LE01Gene10784,>LE01Gene00534,>LE01Gene08015,>LE01Gene…	2.32e-08		Molecular function	ribonucleotide binding	GO:0032553	6	1.36e-11	1.64678	157	865	767	6959	>LE01Gene06839,>LE01Gene01153,>LE01Gene02458,>LE01Gene03366,>LE01Gene03365,>LE01Gene05546,>LE01Gene02038,>LE01Gene06400,>LE01Gene02017,>LE01Gene03345,>LE01Gene01183,>LE01Gene01184,>LE01Gene10017,>LE01Gene09035,>LE01Gene00208,>LE01Gene12662,>LE01Gene10059,>LE01Gene06801,>LE01Gene10066,>LE01Gene10065,>LE01Gene02413,>LE01Gene01563,>LE01Gene10030,>LE01Gene11371,>LE01Gene09434,>LE01Gene08568,>LE01Gene…	1.37e-09
Molecular function	tetrapyrrole binding	GO:0046906	4	2.11e-10	2.15595	65	188	1116	6959	>LE01Gene05507,>LE01Gene01156,>LE01Gene13135,>LE01Gene01161,>LE01Gene08192,>LE01Gene04617,>LE01Gene09060,>LE01Gene11374,>LE01Gene05088,>LE01Gene05089,>LE01Gene09419,>LE01Gene11316,>LE01Gene09446,>LE01Gene06359,>LE01Gene06358,>LE01Gene04157,>LE01Gene08997,>LE01Gene04526,>LE01Gene02731,>LE01Gene00558,>LE01Gene00557,>LE01Gene12580,>LE01Gene00976,>LE01Gene10784,>LE01Gene00534,>LE01Gene08015,>LE01Gene…	2.32e-08		Molecular function	proton transmembrane transporter activity	GO:0015078	7	8.33e-11	4.43998	23	47	767	6959	>LE01Gene01120,>LE01Gene12240,>LE01Gene06352,>LE01Gene13008,>LE01Gene05850,>LE01Gene04586,>LE01Gene01076,>LE01Gene08075,>LE01Gene01885,>LE01Gene14307,>LE01Gene10320,>LE01Gene00929,>LE01Gene03585,>LE01Gene06610,>LE01Gene01780,>LE01Gene10225,>LE01Gene03934,>LE01Gene06179,>LE01Gene03007,>LE01Gene08280,>LE01Gene09140,>LE01Gene03869,>LE01Gene04234,	7.2e-09
Molecular function	lyase activity	GO:0016829	3	2.63e-10	2.47365	48	121	1116	6959	>LE01Gene04653,>LE01Gene04654,>LE01Gene03380,>LE01Gene04205,>LE01Gene13156,>LE01Gene08193,>LE01Gene10457,>LE01Gene10460,>LE01Gene08127,>LE01Gene04142,>LE01Gene07630,>LE01Gene07632,>LE01Gene01907,>LE01Gene12136,>LE01Gene13891,>LE01Gene12537,>LE01Gene04966,>LE01Gene11253,>LE01Gene09791,>LE01Gene00950,>LE01Gene04902,>LE01Gene12986,>LE01Gene02213,>LE01Gene11106,>LE01Gene02614,>LE01Gene02677,>LE01Gene…	2.17e-08		Molecular function	anion binding	GO:0043168	4	1.1e-10	1.5391	181	1067	767	6959	>LE01Gene06839,>LE01Gene01153,>LE01Gene02458,>LE01Gene03366,>LE01Gene03365,>LE01Gene05546,>LE01Gene02038,>LE01Gene06400,>LE01Gene02017,>LE01Gene03345,>LE01Gene06866,>LE01Gene01183,>LE01Gene01184,>LE01Gene10017,>LE01Gene02875,>LE01Gene09035,>LE01Gene00208,>LE01Gene12662,>LE01Gene10059,>LE01Gene06801,>LE01Gene10066,>LE01Gene10065,>LE01Gene02413,>LE01Gene01563,>LE01Gene10030,>LE01Gene11371,>LE01Gene…	8.3e-09
Molecular function	obsolete coenzyme binding	GO:0050662	0	3.88e-10	1.89686	87	286	1116	6959	>LE01Gene13129,>LE01Gene12264,>LE01Gene14012,>LE01Gene07739,>LE01Gene04205,>LE01Gene14008,>LE01Gene13513,>LE01Gene00256,>LE01Gene12238,>LE01Gene02892,>LE01Gene00628,>LE01Gene11722,>LE01Gene10455,>LE01Gene01966,>LE01Gene03297,>LE01Gene07621,>LE01Gene08952,>LE01Gene13084,>LE01Gene11707,>LE01Gene11705,>LE01Gene10868,>LE01Gene04157,>LE01Gene12136,>LE01Gene06745,>LE01Gene01404,>LE01Gene12537,>LE01Gene…	2.85e-08		Molecular function	nucleotide binding	GO:0000166	5	1.96e-10	1.50179	193	1166	767	6959	>LE01Gene06839,>LE01Gene01153,>LE01Gene02458,>LE01Gene03366,>LE01Gene03365,>LE01Gene05546,>LE01Gene02038,>LE01Gene06400,>LE01Gene02017,>LE01Gene03345,>LE01Gene01183,>LE01Gene01184,>LE01Gene10017,>LE01Gene01549,>LE01Gene09035,>LE01Gene00208,>LE01Gene12662,>LE01Gene10059,>LE01Gene06801,>LE01Gene10066,>LE01Gene10065,>LE01Gene02413,>LE01Gene01563,>LE01Gene10030,>LE01Gene01574,>LE01Gene10048,>LE01Gene…	1.32e-08
Molecular function	dioxygenase activity	GO:0051213	4	6.75e-08	2.85361	27	59	1116	6959	>LE01Gene04640,>LE01Gene08198,>LE01Gene11338,>LE01Gene08578,>LE01Gene13914,>LE01Gene04116,>LE01Gene05865,>LE01Gene06713,>LE01Gene05862,>LE01Gene05855,>LE01Gene07610,>LE01Gene11694,>LE01Gene00097,>LE01Gene02634,>LE01Gene00849,>LE01Gene09227,>LE01Gene07049,>LE01Gene01248,>LE01Gene06937,>LE01Gene05662,>LE01Gene02142,>LE01Gene11447,>LE01Gene09131,>LE01Gene00354,>LE01Gene06049,>LE01Gene14052,>LE01Gene…	4.45e-06		Molecular function	nucleoside phosphate binding	GO:1901265	4	1.96e-10	1.50179	193	1166	767	6959	>LE01Gene06839,>LE01Gene01153,>LE01Gene02458,>LE01Gene03366,>LE01Gene03365,>LE01Gene05546,>LE01Gene02038,>LE01Gene06400,>LE01Gene02017,>LE01Gene03345,>LE01Gene01183,>LE01Gene01184,>LE01Gene10017,>LE01Gene01549,>LE01Gene09035,>LE01Gene00208,>LE01Gene12662,>LE01Gene10059,>LE01Gene06801,>LE01Gene10066,>LE01Gene10065,>LE01Gene02413,>LE01Gene01563,>LE01Gene10030,>LE01Gene01574,>LE01Gene10048,>LE01Gene…	1.32e-08
Molecular function	oxidoreductase activity, acting on CH-OH group of donors	GO:0016614	4	1.06e-07	2.3161	39	105	1116	6959	>LE01Gene14012,>LE01Gene00256,>LE01Gene01966,>LE01Gene11775,>LE01Gene05481,>LE01Gene07621,>LE01Gene08952,>LE01Gene10868,>LE01Gene06745,>LE01Gene10788,>LE01Gene07108,>LE01Gene07124,>LE01Gene04010,>LE01Gene04060,>LE01Gene03564,>LE01Gene00047,>LE01Gene09272,>LE01Gene13764,>LE01Gene04820,>LE01Gene12448,>LE01Gene00015,>LE01Gene02678,>LE01Gene04836,>LE01Gene08342,>LE01Gene10632,>LE01Gene02144,>LE01Gene…	6.36e-06		Molecular function	catalytic activity	GO:0003824	2	4.68e-10	1.18537	506	3873	767	6959	>LE01Gene06839,>LE01Gene13123,>LE01Gene13124,>LE01Gene01153,>LE01Gene05510,>LE01Gene02450,>LE01Gene01123,>LE01Gene02458,>LE01Gene12259,>LE01Gene01135,>LE01Gene13119,>LE01Gene03366,>LE01Gene03365,>LE01Gene05546,>LE01Gene02037,>LE01Gene14011,>LE01Gene01193,>LE01Gene04224,>LE01Gene06893,>LE01Gene02494,>LE01Gene03347,>LE01Gene02017,>LE01Gene02019,>LE01Gene13145,>LE01Gene06865,>LE01Gene06866,>LE01Gene…	2.58e-08
Molecular function	monooxygenase activity	GO:0004497	4	5.77e-07	2.36525	33	87	1116	6959	>LE01Gene05507,>LE01Gene13135,>LE01Gene04617,>LE01Gene00261,>LE01Gene05088,>LE01Gene05089,>LE01Gene13969,>LE01Gene11316,>LE01Gene05095,>LE01Gene11705,>LE01Gene00558,>LE01Gene00976,>LE01Gene10784,>LE01Gene04416,>LE01Gene13761,>LE01Gene13763,>LE01Gene10245,>LE01Gene12421,>LE01Gene01347,>LE01Gene09213,>LE01Gene09224,>LE01Gene05229,>LE01Gene06122,>LE01Gene11953,>LE01Gene07440,>LE01Gene05668,>LE01Gene…	3.18e-05		Molecular function	electron transfer activity	GO:0009055	4	4.96e-10	4.65283	20	39	767	6959	>LE01Gene13123,>LE01Gene12240,>LE01Gene01912,>LE01Gene09851,>LE01Gene05850,>LE01Gene01076,>LE01Gene08075,>LE01Gene10320,>LE01Gene08432,>LE01Gene03544,>LE01Gene05778,>LE01Gene02208,>LE01Gene06179,>LE01Gene10683,>LE01Gene02186,>LE01Gene05255,>LE01Gene13274,>LE01Gene08280,>LE01Gene02945,>LE01Gene04234,	2.5e-08
Molecular function	2-oxoglutarate-dependent dioxygenase activity	GO:0016706	5	1.27e-06	3.20691	18	35	1116	6959	>LE01Gene04640,>LE01Gene11338,>LE01Gene13914,>LE01Gene05865,>LE01Gene06713,>LE01Gene05862,>LE01Gene05855,>LE01Gene07610,>LE01Gene11694,>LE01Gene00849,>LE01Gene07049,>LE01Gene06937,>LE01Gene05662,>LE01Gene11447,>LE01Gene09131,>LE01Gene00354,>LE01Gene06049,>LE01Gene06464,	6.45e-05		Molecular function	small molecule binding	GO:0036094	3	4.96e-10	1.46855	202	1248	767	6959	>LE01Gene06839,>LE01Gene01153,>LE01Gene02458,>LE01Gene03366,>LE01Gene03365,>LE01Gene05546,>LE01Gene02038,>LE01Gene06400,>LE01Gene02017,>LE01Gene03345,>LE01Gene06866,>LE01Gene01183,>LE01Gene01184,>LE01Gene10017,>LE01Gene02875,>LE01Gene01549,>LE01Gene09035,>LE01Gene00208,>LE01Gene12662,>LE01Gene10059,>LE01Gene06801,>LE01Gene10066,>LE01Gene10065,>LE01Gene02413,>LE01Gene01563,>LE01Gene10030,>LE01Gene…	2.31e-08
Molecular function	oxidoreductase activity, acting on the CH-OH group of donors, NAD or NADP as acceptor	GO:0016616	5	3.24e-05	2.18653	27	77	1116	6959	>LE01Gene00256,>LE01Gene01966,>LE01Gene11775,>LE01Gene05481,>LE01Gene08952,>LE01Gene06745,>LE01Gene10788,>LE01Gene07108,>LE01Gene07124,>LE01Gene04060,>LE01Gene03564,>LE01Gene00047,>LE01Gene09272,>LE01Gene00015,>LE01Gene10632,>LE01Gene02144,>LE01Gene02143,>LE01Gene00332,>LE01Gene03841,>LE01Gene12309,>LE01Gene03875,>LE01Gene03873,>LE01Gene10999,>LE01Gene01623,>LE01Gene11424,>LE01Gene11898,>LE01Gene…	0.00152865		Molecular function	oxidoreduction-driven active transmembrane transporter activity	GO:0015453	6	7.18e-10	6.35111	14	20	767	6959	>LE01Gene13123,>LE01Gene12240,>LE01Gene09851,>LE01Gene05850,>LE01Gene01076,>LE01Gene08075,>LE01Gene10320,>LE01Gene08432,>LE01Gene05778,>LE01Gene06179,>LE01Gene10683,>LE01Gene02186,>LE01Gene08280,>LE01Gene04234,	3.1e-08
Molecular function	serine-type carboxypeptidase activity	GO:0004185	7	6.32e-05	4.00864	9	14	1116	6959	>LE01Gene09473,>LE01Gene04165,>LE01Gene05410,>LE01Gene05823,>LE01Gene08460,>LE01Gene06260,>LE01Gene07031,>LE01Gene10154,>LE01Gene07312,	0.00278197		Molecular function	adenyl nucleotide binding	GO:0030554	7	1.46e-09	1.64616	129	711	767	6959	>LE01Gene06839,>LE01Gene01153,>LE01Gene02458,>LE01Gene03366,>LE01Gene05546,>LE01Gene02038,>LE01Gene06400,>LE01Gene02017,>LE01Gene01183,>LE01Gene01184,>LE01Gene10017,>LE01Gene09035,>LE01Gene00208,>LE01Gene12662,>LE01Gene10059,>LE01Gene06801,>LE01Gene10066,>LE01Gene10065,>LE01Gene02413,>LE01Gene01563,>LE01Gene11371,>LE01Gene08568,>LE01Gene08571,>LE01Gene02814,>LE01Gene12618,>LE01Gene11776,>LE01Gene…	5.88e-08
Molecular function	pentosyltransferase activity	GO:0016763	5	6.56e-05	3.25339	12	23	1116	6959	>LE01Gene13132,>LE01Gene06881,>LE01Gene13510,>LE01Gene01422,>LE01Gene11247,>LE01Gene11248,>LE01Gene10334,>LE01Gene12908,>LE01Gene02239,>LE01Gene03859,>LE01Gene09114,>LE01Gene07329,	0.00270572		Molecular function	obsolete drug binding	GO:0008144	0	1.82e-09	1.61804	135	757	767	6959	>LE01Gene06839,>LE01Gene01153,>LE01Gene02458,>LE01Gene03366,>LE01Gene05546,>LE01Gene02038,>LE01Gene06400,>LE01Gene02017,>LE01Gene02019,>LE01Gene06866,>LE01Gene01183,>LE01Gene01184,>LE01Gene10017,>LE01Gene02875,>LE01Gene09035,>LE01Gene00208,>LE01Gene12662,>LE01Gene10059,>LE01Gene06801,>LE01Gene10066,>LE01Gene10065,>LE01Gene02413,>LE01Gene01563,>LE01Gene11371,>LE01Gene08568,>LE01Gene08571,>LE01Gene…	6.89e-08
Molecular function	carboxypeptidase activity	GO:0004180	6	7.09e-05	3.42961	11	20	1116	6959	>LE01Gene02852,>LE01Gene09473,>LE01Gene04165,>LE01Gene05870,>LE01Gene05410,>LE01Gene05823,>LE01Gene08460,>LE01Gene06260,>LE01Gene07031,>LE01Gene10154,>LE01Gene07312,	0.00275211		Molecular function	adenyl ribonucleotide binding	GO:0032559	8	2.67e-09	1.63908	127	703	767	6959	>LE01Gene06839,>LE01Gene01153,>LE01Gene02458,>LE01Gene03366,>LE01Gene05546,>LE01Gene02038,>LE01Gene06400,>LE01Gene02017,>LE01Gene01183,>LE01Gene01184,>LE01Gene10017,>LE01Gene09035,>LE01Gene00208,>LE01Gene12662,>LE01Gene10059,>LE01Gene06801,>LE01Gene10066,>LE01Gene10065,>LE01Gene02413,>LE01Gene01563,>LE01Gene11371,>LE01Gene08568,>LE01Gene08571,>LE01Gene02814,>LE01Gene12618,>LE01Gene11776,>LE01Gene…	9.49e-08
Molecular function	vitamin binding	GO:0019842	4	9.38e-05	2.10555	26	77	1116	6959	>LE01Gene04649,>LE01Gene12266,>LE01Gene07739,>LE01Gene04205,>LE01Gene02892,>LE01Gene00628,>LE01Gene03297,>LE01Gene12136,>LE01Gene01404,>LE01Gene12537,>LE01Gene01371,>LE01Gene11102,>LE01Gene13771,>LE01Gene10653,>LE01Gene11927,>LE01Gene12381,>LE01Gene04325,>LE01Gene01674,>LE01Gene09131,>LE01Gene02539,>LE01Gene11499,>LE01Gene08271,>LE01Gene10585,>LE01Gene08627,>LE01Gene11817,>LE01Gene08653,	0.00343957		Molecular function	ATP binding	GO:0005524	9	2.99e-09	1.64017	126	697	767	6959	>LE01Gene06839,>LE01Gene01153,>LE01Gene02458,>LE01Gene03366,>LE01Gene05546,>LE01Gene02038,>LE01Gene06400,>LE01Gene02017,>LE01Gene01183,>LE01Gene01184,>LE01Gene10017,>LE01Gene09035,>LE01Gene00208,>LE01Gene12662,>LE01Gene10059,>LE01Gene06801,>LE01Gene10066,>LE01Gene10065,>LE01Gene02413,>LE01Gene01563,>LE01Gene11371,>LE01Gene08568,>LE01Gene08571,>LE01Gene02814,>LE01Gene12618,>LE01Gene11776,>LE01Gene…	1.01e-07
Molecular function	carbon-oxygen lyase activity	GO:0016835	4	0.000114	2.62554	16	38	1116	6959	>LE01Gene04653,>LE01Gene04654,>LE01Gene13156,>LE01Gene08193,>LE01Gene10457,>LE01Gene01907,>LE01Gene13891,>LE01Gene09791,>LE01Gene02677,>LE01Gene05711,>LE01Gene12832,>LE01Gene05292,>LE01Gene06537,>LE01Gene05603,>LE01Gene04720,>LE01Gene02095,	0.00395648		Molecular function	primary active transmembrane transporter activity	GO:0015399	5	3.25e-09	3.165	30	86	767	6959	>LE01Gene13123,>LE01Gene01153,>LE01Gene12240,>LE01Gene08571,>LE01Gene12618,>LE01Gene09851,>LE01Gene13008,>LE01Gene05850,>LE01Gene01076,>LE01Gene11221,>LE01Gene08075,>LE01Gene01885,>LE01Gene10320,>LE01Gene08419,>LE01Gene08432,>LE01Gene03585,>LE01Gene06610,>LE01Gene05778,>LE01Gene01780,>LE01Gene06179,>LE01Gene01735,>LE01Gene10683,>LE01Gene02186,>LE01Gene03007,>LE01Gene09163,>LE01Gene08280,>LE01Gene…	1.03e-07
Molecular function	serine-type exopeptidase activity	GO:0070008	6	0.000136	3.7414	9	15	1116	6959	>LE01Gene09473,>LE01Gene04165,>LE01Gene05410,>LE01Gene05823,>LE01Gene08460,>LE01Gene06260,>LE01Gene07031,>LE01Gene10154,>LE01Gene07312,	0.0044746		Molecular function	structural constituent of ribosome	GO:0003735	3	4.61e-08	2.65933	34	116	767	6959	>LE01Gene03323,>LE01Gene14438,>LE01Gene03363,>LE01Gene00242,>LE01Gene01960,>LE01Gene09867,>LE01Gene05499,>LE01Gene05411,>LE01Gene08921,>LE01Gene13881,>LE01Gene11238,>LE01Gene00147,>LE01Gene10309,>LE01Gene00960,>LE01Gene02296,>LE01Gene00911,>LE01Gene08401,>LE01Gene03586,>LE01Gene00461,>LE01Gene13327,>LE01Gene12459,>LE01Gene11500,>LE01Gene00865,>LE01Gene09654,>LE01Gene07026,>LE01Gene03027,>LE01Gene…	1.4e-06
Molecular function	O-methyltransferase activity	GO:0008171	6	0.000152	2.89513	13	28	1116	6959	>LE01Gene08162,>LE01Gene12646,>LE01Gene06703,>LE01Gene13031,>LE01Gene09304,>LE01Gene09724,>LE01Gene11180,>LE01Gene13774,>LE01Gene11541,>LE01Gene11948,>LE01Gene09181,>LE01Gene05106,>LE01Gene09518,	0.00477525		Molecular function	active transmembrane transporter activity	GO:0022804	4	1.1e-07	2.66364	32	109	767	6959	>LE01Gene13123,>LE01Gene01153,>LE01Gene12240,>LE01Gene08571,>LE01Gene12618,>LE01Gene06355,>LE01Gene09851,>LE01Gene13008,>LE01Gene05850,>LE01Gene01076,>LE01Gene11221,>LE01Gene08075,>LE01Gene01885,>LE01Gene10320,>LE01Gene08419,>LE01Gene08432,>LE01Gene00929,>LE01Gene03585,>LE01Gene06610,>LE01Gene05778,>LE01Gene01780,>LE01Gene06179,>LE01Gene01735,>LE01Gene10683,>LE01Gene02186,>LE01Gene03007,>LE01Gene…	3.18e-06
Molecular function	carbon-carbon lyase activity	GO:0016830	4	0.000165	2.55822	16	39	1116	6959	>LE01Gene04205,>LE01Gene08127,>LE01Gene07630,>LE01Gene07632,>LE01Gene12136,>LE01Gene12537,>LE01Gene00950,>LE01Gene04902,>LE01Gene11106,>LE01Gene06597,>LE01Gene12381,>LE01Gene06989,>LE01Gene02988,>LE01Gene11499,>LE01Gene11894,>LE01Gene04296,	0.00494157		Molecular function	hydrolase activity, acting on acid anhydrides	GO:0016817	4	1.43e-07	1.86959	68	330	767	6959	>LE01Gene01153,>LE01Gene03366,>LE01Gene03365,>LE01Gene05546,>LE01Gene02017,>LE01Gene00208,>LE01Gene10059,>LE01Gene06801,>LE01Gene10066,>LE01Gene02413,>LE01Gene10030,>LE01Gene00240,>LE01Gene08568,>LE01Gene08571,>LE01Gene08138,>LE01Gene12618,>LE01Gene05464,>LE01Gene09851,>LE01Gene08526,>LE01Gene13008,>LE01Gene02350,>LE01Gene05437,>LE01Gene11221,>LE01Gene08065,>LE01Gene01434,>LE01Gene01435,>LE01Gene…	3.94e-06
Molecular function	carbon-nitrogen ligase activity, with glutamine as amido-N-donor	GO:0016884	5	0.000248	3.28193	10	19	1116	6959	>LE01Gene01054,>LE01Gene07172,>LE01Gene04905,>LE01Gene07156,>LE01Gene05356,>LE01Gene07910,>LE01Gene05302,>LE01Gene00447,>LE01Gene06939,>LE01Gene10195,	0.00712055		Molecular function	hydrolase activity, acting on acid anhydrides, in phosphorus-containing anhydrides	GO:0016818	5	5.53e-07	1.82567	66	328	767	6959	>LE01Gene01153,>LE01Gene03366,>LE01Gene03365,>LE01Gene05546,>LE01Gene02017,>LE01Gene00208,>LE01Gene10059,>LE01Gene06801,>LE01Gene10066,>LE01Gene02413,>LE01Gene10030,>LE01Gene00240,>LE01Gene08568,>LE01Gene08571,>LE01Gene08138,>LE01Gene12618,>LE01Gene05464,>LE01Gene08526,>LE01Gene13008,>LE01Gene02350,>LE01Gene05437,>LE01Gene11221,>LE01Gene08065,>LE01Gene01434,>LE01Gene01435,>LE01Gene01885,>LE01Gene…	1.45e-05
Molecular function	ligase activity, forming carbon-nitrogen bonds	GO:0016879	4	0.000307	2.11053	22	65	1116	6959	>LE01Gene12269,>LE01Gene01586,>LE01Gene13915,>LE01Gene00650,>LE01Gene01054,>LE01Gene01407,>LE01Gene07172,>LE01Gene04905,>LE01Gene09327,>LE01Gene07156,>LE01Gene09703,>LE01Gene05356,>LE01Gene07910,>LE01Gene05302,>LE01Gene07980,>LE01Gene00453,>LE01Gene00447,>LE01Gene11906,>LE01Gene07875,>LE01Gene06939,>LE01Gene10195,>LE01Gene00353,	0.0084356		Molecular function	inorganic cation transmembrane transporter activity	GO:0022890	6	1.39e-06	2.6341	27	93	767	6959	>LE01Gene01120,>LE01Gene12240,>LE01Gene12618,>LE01Gene06352,>LE01Gene13008,>LE01Gene05850,>LE01Gene04586,>LE01Gene01076,>LE01Gene08075,>LE01Gene01885,>LE01Gene14307,>LE01Gene10320,>LE01Gene00929,>LE01Gene03585,>LE01Gene06610,>LE01Gene02270,>LE01Gene01780,>LE01Gene10225,>LE01Gene03934,>LE01Gene06179,>LE01Gene03007,>LE01Gene08280,>LE01Gene09140,>LE01Gene03869,>LE01Gene11842,>LE01Gene05183,>LE01Gene…	3.5e-05
Molecular function	serine-type peptidase activity	GO:0008236	5	0.000332	2.18795	20	57	1116	6959	>LE01Gene09473,>LE01Gene11793,>LE01Gene13977,>LE01Gene04165,>LE01Gene07675,>LE01Gene05410,>LE01Gene05823,>LE01Gene08460,>LE01Gene06260,>LE01Gene11653,>LE01Gene12476,>LE01Gene13788,>LE01Gene07031,>LE01Gene12866,>LE01Gene05677,>LE01Gene10154,>LE01Gene08615,>LE01Gene05588,>LE01Gene04243,>LE01Gene07312,	0.00876554		Molecular function	pyrophosphatase activity	GO:0016462	6	1.63e-06	1.7922	64	324	767	6959	>LE01Gene01153,>LE01Gene03366,>LE01Gene03365,>LE01Gene05546,>LE01Gene10059,>LE01Gene06801,>LE01Gene10066,>LE01Gene02413,>LE01Gene10030,>LE01Gene00240,>LE01Gene08568,>LE01Gene08571,>LE01Gene08138,>LE01Gene12618,>LE01Gene05464,>LE01Gene08526,>LE01Gene13008,>LE01Gene02350,>LE01Gene05437,>LE01Gene11221,>LE01Gene08065,>LE01Gene01434,>LE01Gene01435,>LE01Gene01885,>LE01Gene11633,>LE01Gene00959,>LE01Gene…	3.93e-05
Molecular function	serine hydrolase activity	GO:0017171	4	0.000332	2.18795	20	57	1116	6959	>LE01Gene09473,>LE01Gene11793,>LE01Gene13977,>LE01Gene04165,>LE01Gene07675,>LE01Gene05410,>LE01Gene05823,>LE01Gene08460,>LE01Gene06260,>LE01Gene11653,>LE01Gene12476,>LE01Gene13788,>LE01Gene07031,>LE01Gene12866,>LE01Gene05677,>LE01Gene10154,>LE01Gene08615,>LE01Gene05588,>LE01Gene04243,>LE01Gene07312,	0.00876554		Molecular function	ribonucleoside triphosphate phosphatase activity	GO:0017111	7	1.77e-06	1.79748	63	318	767	6959	>LE01Gene01153,>LE01Gene03366,>LE01Gene03365,>LE01Gene05546,>LE01Gene10059,>LE01Gene06801,>LE01Gene10066,>LE01Gene02413,>LE01Gene10030,>LE01Gene00240,>LE01Gene08568,>LE01Gene08571,>LE01Gene08138,>LE01Gene12618,>LE01Gene08526,>LE01Gene13008,>LE01Gene02350,>LE01Gene05437,>LE01Gene11221,>LE01Gene08065,>LE01Gene01434,>LE01Gene01435,>LE01Gene01885,>LE01Gene11633,>LE01Gene00959,>LE01Gene10330,>LE01Gene…	4.12e-05
Molecular function	transferase activity, transferring alkyl or aryl (other than methyl) groups	GO:0016765	4	0.000355	2.70212	13	30	1116	6959	>LE01Gene00290,>LE01Gene05932,>LE01Gene11373,>LE01Gene09443,>LE01Gene10823,>LE01Gene02397,>LE01Gene11602,>LE01Gene07177,>LE01Gene07012,>LE01Gene06195,>LE01Gene02135,>LE01Gene01624,>LE01Gene08627,	0.00867633		Molecular function	ATP-dependent activity	GO:0140657	2	4.38e-06	1.89812	50	239	767	6959	>LE01Gene01153,>LE01Gene03366,>LE01Gene05546,>LE01Gene10059,>LE01Gene06801,>LE01Gene10066,>LE01Gene02413,>LE01Gene00240,>LE01Gene08568,>LE01Gene08571,>LE01Gene12618,>LE01Gene08526,>LE01Gene13008,>LE01Gene02350,>LE01Gene05437,>LE01Gene11221,>LE01Gene08065,>LE01Gene01885,>LE01Gene11633,>LE01Gene00959,>LE01Gene11651,>LE01Gene12981,>LE01Gene03179,>LE01Gene08419,>LE01Gene07551,>LE01Gene10711,>LE01Gene…	9.8e-05
Molecular function	hydro-lyase activity	GO:0016836	5	0.000451	2.77141	12	27	1116	6959	>LE01Gene04653,>LE01Gene04654,>LE01Gene10457,>LE01Gene01907,>LE01Gene13891,>LE01Gene09791,>LE01Gene02677,>LE01Gene12832,>LE01Gene05292,>LE01Gene05603,>LE01Gene04720,>LE01Gene02095,	0.010633		Molecular function	inorganic molecular entity transmembrane transporter activity	GO:0015318	4	7.84e-06	2.20154	33	136	767	6959	>LE01Gene01120,>LE01Gene12240,>LE01Gene13912,>LE01Gene08155,>LE01Gene07276,>LE01Gene12618,>LE01Gene06352,>LE01Gene13008,>LE01Gene05850,>LE01Gene04586,>LE01Gene01076,>LE01Gene08075,>LE01Gene01885,>LE01Gene14307,>LE01Gene10320,>LE01Gene00929,>LE01Gene03585,>LE01Gene06610,>LE01Gene12056,>LE01Gene02270,>LE01Gene01780,>LE01Gene10225,>LE01Gene03934,>LE01Gene06179,>LE01Gene09688,>LE01Gene06956,>LE01Gene…	0.000169
Molecular function	aldehyde-lyase activity	GO:0016832	5	0.000548	5.19639	5	6	1116	6959	>LE01Gene04902,>LE01Gene11106,>LE01Gene06597,>LE01Gene02988,>LE01Gene04296,	0.0124613		Molecular function	cation transmembrane transporter activity	GO:0008324	5	9.56e-06	2.40168	27	102	767	6959	>LE01Gene01120,>LE01Gene12240,>LE01Gene12618,>LE01Gene06352,>LE01Gene13008,>LE01Gene05850,>LE01Gene04586,>LE01Gene01076,>LE01Gene08075,>LE01Gene01885,>LE01Gene14307,>LE01Gene10320,>LE01Gene00929,>LE01Gene03585,>LE01Gene06610,>LE01Gene02270,>LE01Gene01780,>LE01Gene10225,>LE01Gene03934,>LE01Gene06179,>LE01Gene03007,>LE01Gene08280,>LE01Gene09140,>LE01Gene03869,>LE01Gene11842,>LE01Gene05183,>LE01Gene…	0.000199
Molecular function	exopeptidase activity	GO:0008238	5	0.000601	2.39833	15	39	1116	6959	>LE01Gene01150,>LE01Gene02852,>LE01Gene09473,>LE01Gene04165,>LE01Gene03689,>LE01Gene05870,>LE01Gene05410,>LE01Gene05823,>LE01Gene08460,>LE01Gene00983,>LE01Gene06260,>LE01Gene04489,>LE01Gene07031,>LE01Gene10154,>LE01Gene07312,	0.0132277		Molecular function	proton-transporting ATP synthase activity, rotational mechanism	GO:0046933	9	1.12e-05	7.77687	6	7	767	6959	>LE01Gene13008,>LE01Gene01885,>LE01Gene03585,>LE01Gene06610,>LE01Gene01780,>LE01Gene03007,	0.000225
Molecular function	hydrolase activity, acting on glycosyl bonds	GO:0016798	4	0.000617	1.54407	52	210	1116	6959	>LE01Gene14459,>LE01Gene04647,>LE01Gene01164,>LE01Gene12203,>LE01Gene04612,>LE01Gene02438,>LE01Gene05083,>LE01Gene05084,>LE01Gene11720,>LE01Gene13979,>LE01Gene05090,>LE01Gene09459,>LE01Gene06326,>LE01Gene07656,>LE01Gene06300,>LE01Gene11715,>LE01Gene08044,>LE01Gene01448,>LE01Gene10302,>LE01Gene01844,>LE01Gene11646,>LE01Gene12986,>LE01Gene09736,>LE01Gene02697,>LE01Gene04812,>LE01Gene02639,>LE01Gene…	0.0131466		Molecular function	proton channel activity	GO:0015252	8	1.12e-05	7.77687	6	7	767	6959	>LE01Gene13008,>LE01Gene01885,>LE01Gene03585,>LE01Gene06610,>LE01Gene01780,>LE01Gene03007,	0.000225
Molecular function	peptidase activity	GO:0008233	4	0.000678	1.51168	56	231	1116	6959	>LE01Gene01150,>LE01Gene06847,>LE01Gene06858,>LE01Gene02852,>LE01Gene05928,>LE01Gene04199,>LE01Gene09473,>LE01Gene11793,>LE01Gene13976,>LE01Gene13977,>LE01Gene00642,>LE01Gene04165,>LE01Gene07675,>LE01Gene03689,>LE01Gene05870,>LE01Gene13052,>LE01Gene12184,>LE01Gene05410,>LE01Gene05418,>LE01Gene01888,>LE01Gene04912,>LE01Gene07195,>LE01Gene05823,>LE01Gene04979,>LE01Gene14775,>LE01Gene00141,>LE01Gene…	0.0139911		Molecular function	active ion transmembrane transporter activity	GO:0022853	5	1.31e-05	2.96935	18	55	767	6959	>LE01Gene12240,>LE01Gene12618,>LE01Gene13008,>LE01Gene05850,>LE01Gene01076,>LE01Gene08075,>LE01Gene01885,>LE01Gene10320,>LE01Gene00929,>LE01Gene03585,>LE01Gene06610,>LE01Gene01780,>LE01Gene06179,>LE01Gene03007,>LE01Gene08280,>LE01Gene11842,>LE01Gene05183,>LE01Gene04234,	0.000247
Molecular function	hydrolase activity, acting on carbon-nitrogen (but not peptide) bonds	GO:0016810	4	0.000781	1.98818	22	69	1116	6959	>LE01Gene06818,>LE01Gene07739,>LE01Gene09080,>LE01Gene00247,>LE01Gene00645,>LE01Gene05870,>LE01Gene06726,>LE01Gene04567,>LE01Gene05800,>LE01Gene05356,>LE01Gene05330,>LE01Gene02230,>LE01Gene12490,>LE01Gene12831,>LE01Gene11524,>LE01Gene07896,>LE01Gene06514,>LE01Gene06517,>LE01Gene12328,>LE01Gene00352,>LE01Gene06090,>LE01Gene06091,	0.0156265		Molecular function	ion transmembrane transporter activity	GO:0015075	4	1.48e-05	2.11289	34	146	767	6959	>LE01Gene01120,>LE01Gene12240,>LE01Gene13912,>LE01Gene08155,>LE01Gene07276,>LE01Gene12618,>LE01Gene06352,>LE01Gene13008,>LE01Gene05850,>LE01Gene04586,>LE01Gene01076,>LE01Gene08075,>LE01Gene01885,>LE01Gene14307,>LE01Gene10320,>LE01Gene00929,>LE01Gene03585,>LE01Gene00078,>LE01Gene06610,>LE01Gene12056,>LE01Gene02270,>LE01Gene01780,>LE01Gene10225,>LE01Gene03934,>LE01Gene06179,>LE01Gene09688,>LE01Gene…	0.000272
Molecular function	hydrolase activity, hydrolyzing O-glycosyl compounds	GO:0004553	5	0.00100134	1.53541	49	199	1116	6959	>LE01Gene04647,>LE01Gene01164,>LE01Gene12203,>LE01Gene04612,>LE01Gene02438,>LE01Gene05083,>LE01Gene05084,>LE01Gene13979,>LE01Gene05090,>LE01Gene09459,>LE01Gene06326,>LE01Gene07656,>LE01Gene06300,>LE01Gene11715,>LE01Gene08044,>LE01Gene01448,>LE01Gene10302,>LE01Gene01844,>LE01Gene11646,>LE01Gene12986,>LE01Gene09736,>LE01Gene02697,>LE01Gene04812,>LE01Gene02639,>LE01Gene10240,>LE01Gene07086,>LE01Gene…	0.0194377		Molecular function	transmembrane transporter activity	GO:0022857	3	2.96e-05	1.75389	52	269	767	6959	>LE01Gene13123,>LE01Gene01153,>LE01Gene01120,>LE01Gene00254,>LE01Gene12240,>LE01Gene13912,>LE01Gene08571,>LE01Gene08155,>LE01Gene07276,>LE01Gene12618,>LE01Gene13065,>LE01Gene06355,>LE01Gene09851,>LE01Gene06352,>LE01Gene13008,>LE01Gene05850,>LE01Gene04586,>LE01Gene01076,>LE01Gene11221,>LE01Gene08075,>LE01Gene01885,>LE01Gene14307,>LE01Gene10320,>LE01Gene08419,>LE01Gene08432,>LE01Gene00929,>LE01Gene…	0.000526
Molecular function	pyridoxal phosphate binding	GO:0030170	6	0.00121608	2.04272	19	58	1116	6959	>LE01Gene07739,>LE01Gene04205,>LE01Gene00628,>LE01Gene03297,>LE01Gene01404,>LE01Gene12537,>LE01Gene01371,>LE01Gene11102,>LE01Gene13771,>LE01Gene10653,>LE01Gene11927,>LE01Gene12381,>LE01Gene04325,>LE01Gene01674,>LE01Gene02539,>LE01Gene08271,>LE01Gene10585,>LE01Gene08627,>LE01Gene11817,	0.0229317		Molecular function	transporter activity	GO:0005215	2	4.1e-05	1.6597	60	328	767	6959	>LE01Gene13123,>LE01Gene01153,>LE01Gene01120,>LE01Gene00254,>LE01Gene12240,>LE01Gene05076,>LE01Gene13912,>LE01Gene08571,>LE01Gene08155,>LE01Gene07276,>LE01Gene12618,>LE01Gene13065,>LE01Gene06355,>LE01Gene09851,>LE01Gene06352,>LE01Gene13008,>LE01Gene05850,>LE01Gene04586,>LE01Gene01076,>LE01Gene11221,>LE01Gene08075,>LE01Gene01885,>LE01Gene14307,>LE01Gene10320,>LE01Gene08419,>LE01Gene08432,>LE01Gene…	0.00071
Molecular function	vitamin B6 binding	GO:0070279	5	0.00121608	2.04272	19	58	1116	6959	>LE01Gene07739,>LE01Gene04205,>LE01Gene00628,>LE01Gene03297,>LE01Gene01404,>LE01Gene12537,>LE01Gene01371,>LE01Gene11102,>LE01Gene13771,>LE01Gene10653,>LE01Gene11927,>LE01Gene12381,>LE01Gene04325,>LE01Gene01674,>LE01Gene02539,>LE01Gene08271,>LE01Gene10585,>LE01Gene08627,>LE01Gene11817,	0.0229317		Molecular function	oxidoreductase activity, acting on NAD(P)H	GO:0016651	4	4.4e-05	3.83858	11	26	767	6959	>LE01Gene13123,>LE01Gene11377,>LE01Gene09851,>LE01Gene03245,>LE01Gene03255,>LE01Gene07617,>LE01Gene10351,>LE01Gene08432,>LE01Gene05778,>LE01Gene10683,>LE01Gene02186,	0.00074
Molecular function	hydrolase activity	GO:0016787	3	0.00122935	1.17087	261	1390	1116	6959	>LE01Gene05983,>LE01Gene14459,>LE01Gene01150,>LE01Gene06847,>LE01Gene06818,>LE01Gene12252,>LE01Gene12253,>LE01Gene02460,>LE01Gene05977,>LE01Gene05973,>LE01Gene04647,>LE01Gene04218,>LE01Gene03376,>LE01Gene07739,>LE01Gene01164,>LE01Gene06858,>LE01Gene02025,>LE01Gene10018,>LE01Gene10024,>LE01Gene12203,>LE01Gene02852,>LE01Gene02854,>LE01Gene00684,>LE01Gene13992,>LE01Gene13518,>LE01Gene04613,>LE01Gene…	0.021929		Molecular function	DNA binding	GO:0003677	5	5.69e-05	1.50322	84	507	767	6959	>LE01Gene05510,>LE01Gene05966,>LE01Gene02458,>LE01Gene03366,>LE01Gene05520,>LE01Gene02017,>LE01Gene08161,>LE01Gene01532,>LE01Gene00208,>LE01Gene10059,>LE01Gene10066,>LE01Gene02413,>LE01Gene01563,>LE01Gene04609,>LE01Gene00640,>LE01Gene06315,>LE01Gene03287,>LE01Gene09820,>LE01Gene05470,>LE01Gene06785,>LE01Gene07689,>LE01Gene10851,>LE01Gene08526,>LE01Gene04172,>LE01Gene05860,>LE01Gene05873,>LE01Gene…	0.00093
Molecular function	aspartic-type endopeptidase activity	GO:0004190	6	0.00142731	2.16893	16	46	1116	6959	>LE01Gene06847,>LE01Gene04199,>LE01Gene00642,>LE01Gene12184,>LE01Gene05418,>LE01Gene04979,>LE01Gene12959,>LE01Gene12411,>LE01Gene12816,>LE01Gene12715,>LE01Gene05178,>LE01Gene05186,>LE01Gene09101,>LE01Gene05586,>LE01Gene06423,>LE01Gene06489,	0.02479		Molecular function	ion channel activity	GO:0005216	6	7.6e-05	4.29774	9	19	767	6959	>LE01Gene13008,>LE01Gene01885,>LE01Gene03585,>LE01Gene06610,>LE01Gene12056,>LE01Gene01780,>LE01Gene09688,>LE01Gene06956,>LE01Gene03007,	0.0012107
Molecular function	aspartic-type peptidase activity	GO:0070001	5	0.00142731	2.16893	16	46	1116	6959	>LE01Gene06847,>LE01Gene04199,>LE01Gene00642,>LE01Gene12184,>LE01Gene05418,>LE01Gene04979,>LE01Gene12959,>LE01Gene12411,>LE01Gene12816,>LE01Gene12715,>LE01Gene05178,>LE01Gene05186,>LE01Gene09101,>LE01Gene05586,>LE01Gene06423,>LE01Gene06489,	0.02479		Molecular function	cytochrome-c oxidase activity	GO:0004129	8	0.00011	6.04867	6	9	767	6959	>LE01Gene12240,>LE01Gene01076,>LE01Gene10320,>LE01Gene06179,>LE01Gene08280,>LE01Gene04234,	0.00170928
Molecular function	racemase and epimerase activity	GO:0016854	4	0.00166234	4.45405	5	7	1116	6959	>LE01Gene06846,>LE01Gene01199,>LE01Gene08877,>LE01Gene09277,>LE01Gene03058,	0.0274286		Molecular function	oxidoreductase activity, acting on NAD(P)H, quinone or similar compound as acceptor	GO:0016655	5	0.00011	6.04867	6	9	767	6959	>LE01Gene13123,>LE01Gene09851,>LE01Gene08432,>LE01Gene05778,>LE01Gene10683,>LE01Gene02186,	0.00170928
Molecular function	intramolecular oxidoreductase activity, interconverting aldoses and ketoses	GO:0016861	5	0.00166234	4.45405	5	7	1116	6959	>LE01Gene04192,>LE01Gene11222,>LE01Gene03017,>LE01Gene01640,>LE01Gene05567,	0.0274286		Molecular function	oxidoreductase activity, acting on a heme group of donors	GO:0016675	4	0.00011	6.04867	6	9	767	6959	>LE01Gene12240,>LE01Gene01076,>LE01Gene10320,>LE01Gene06179,>LE01Gene08280,>LE01Gene04234,	0.00170928
Molecular function	enzyme inhibitor activity	GO:0004857	4	0.00166234	4.45405	5	7	1116	6959	>LE01Gene12503,>LE01Gene05309,>LE01Gene05314,>LE01Gene05312,>LE01Gene04862,	0.0274286		Molecular function	obsolete oxidoreductase activity, acting on a heme group of donors, oxygen as acceptor	GO:0016676	0	0.00011	6.04867	6	9	767	6959	>LE01Gene12240,>LE01Gene01076,>LE01Gene10320,>LE01Gene06179,>LE01Gene08280,>LE01Gene04234,	0.00170928
Molecular function	carboxy-lyase activity	GO:0016831	5	0.00244452	2.59819	10	24	1116	6959	>LE01Gene04205,>LE01Gene07630,>LE01Gene07632,>LE01Gene12136,>LE01Gene12537,>LE01Gene00950,>LE01Gene12381,>LE01Gene06989,>LE01Gene11499,>LE01Gene11894,	0.0375205		Molecular function	obsolete heme-copper terminal oxidase activity	GO:0015002	0	0.00011	6.04867	6	9	767	6959	>LE01Gene12240,>LE01Gene01076,>LE01Gene10320,>LE01Gene06179,>LE01Gene08280,>LE01Gene04234,	0.00170928
Molecular function	FMN binding	GO:0010181	7	0.00250116	2.12579	15	44	1116	6959	>LE01Gene12264,>LE01Gene14008,>LE01Gene13513,>LE01Gene10455,>LE01Gene13084,>LE01Gene04157,>LE01Gene01873,>LE01Gene05328,>LE01Gene04416,>LE01Gene03524,>LE01Gene12483,>LE01Gene08338,>LE01Gene00394,>LE01Gene08707,>LE01Gene05160,	0.0375174		Molecular function	NADH dehydrogenase activity	GO:0003954	5	0.00011	6.04867	6	9	767	6959	>LE01Gene13123,>LE01Gene09851,>LE01Gene08432,>LE01Gene05778,>LE01Gene10683,>LE01Gene02186,	0.00170928
Molecular function	flavin adenine dinucleotide binding	GO:0050660	6	0.00281326	1.72476	26	94	1116	6959	>LE01Gene13129,>LE01Gene14012,>LE01Gene10455,>LE01Gene07621,>LE01Gene11707,>LE01Gene11705,>LE01Gene10868,>LE01Gene06745,>LE01Gene10788,>LE01Gene07124,>LE01Gene04010,>LE01Gene00047,>LE01Gene13764,>LE01Gene04820,>LE01Gene12448,>LE01Gene00015,>LE01Gene02678,>LE01Gene04836,>LE01Gene08342,>LE01Gene05668,>LE01Gene05678,>LE01Gene02540,>LE01Gene13676,>LE01Gene05597,>LE01Gene10914,>LE01Gene07753,	0.0412611		Molecular function	NAD(P)H dehydrogenase (quinone) activity	GO:0003955	6	0.00011	6.04867	6	9	767	6959	>LE01Gene13123,>LE01Gene09851,>LE01Gene08432,>LE01Gene05778,>LE01Gene10683,>LE01Gene02186,	0.00170928
Molecular function	NADP binding	GO:0050661	6	0.00362524	2.36525	11	29	1116	6959	>LE01Gene10455,>LE01Gene08952,>LE01Gene11705,>LE01Gene07114,>LE01Gene09272,>LE01Gene10632,>LE01Gene05668,>LE01Gene05678,>LE01Gene03841,>LE01Gene13676,>LE01Gene01623,	0.0509076		Molecular function	NADH dehydrogenase (ubiquinone) activity	GO:0008137	8	0.00011	6.04867	6	9	767	6959	>LE01Gene13123,>LE01Gene09851,>LE01Gene08432,>LE01Gene05778,>LE01Gene10683,>LE01Gene02186,	0.00170928
Molecular function	ligase activity	GO:0016874	3	0.00382723	1.52874	38	155	1116	6959	>LE01Gene12269,>LE01Gene01520,>LE01Gene01586,>LE01Gene10058,>LE01Gene09892,>LE01Gene13915,>LE01Gene00650,>LE01Gene01963,>LE01Gene04519,>LE01Gene00166,>LE01Gene03256,>LE01Gene01054,>LE01Gene01438,>LE01Gene01407,>LE01Gene01477,>LE01Gene12954,>LE01Gene10765,>LE01Gene07172,>LE01Gene04905,>LE01Gene09327,>LE01Gene07156,>LE01Gene09703,>LE01Gene05356,>LE01Gene08833,>LE01Gene07910,>LE01Gene05302,>LE01Gene…	0.0526244		Molecular function	NADH dehydrogenase (quinone) activity	GO:0050136	7	0.00011	6.04867	6	9	767	6959	>LE01Gene13123,>LE01Gene09851,>LE01Gene08432,>LE01Gene05778,>LE01Gene10683,>LE01Gene02186,	0.00170928
Molecular function	peroxiredoxin activity	GO:0051920	6	0.00384783	3.89729	5	8	1116	6959	>LE01Gene08991,>LE01Gene01844,>LE01Gene02143,>LE01Gene08669,>LE01Gene08639,	0.051828		Molecular function	passive transmembrane transporter activity	GO:0022803	4	0.000125	4.08286	9	20	767	6959	>LE01Gene13008,>LE01Gene01885,>LE01Gene03585,>LE01Gene06610,>LE01Gene12056,>LE01Gene01780,>LE01Gene09688,>LE01Gene06956,>LE01Gene03007,	0.00157343
Molecular function	ligase activity, forming carbon-oxygen bonds	GO:0016875	4	0.00460315	2.13325	13	38	1116	6959	>LE01Gene01520,>LE01Gene10058,>LE01Gene01963,>LE01Gene04519,>LE01Gene00166,>LE01Gene03256,>LE01Gene01438,>LE01Gene01477,>LE01Gene10765,>LE01Gene08833,>LE01Gene01304,>LE01Gene08387,>LE01Gene12401,	0.0552378		Molecular function	channel activity	GO:0015267	5	0.000125	4.08286	9	20	767	6959	>LE01Gene13008,>LE01Gene01885,>LE01Gene03585,>LE01Gene06610,>LE01Gene12056,>LE01Gene01780,>LE01Gene09688,>LE01Gene06956,>LE01Gene03007,	0.00157343
Molecular function	aminoacyl-tRNA ligase activity	GO:0004812	6	0.00460315	2.13325	13	38	1116	6959	>LE01Gene01520,>LE01Gene10058,>LE01Gene01963,>LE01Gene04519,>LE01Gene00166,>LE01Gene03256,>LE01Gene01438,>LE01Gene01477,>LE01Gene10765,>LE01Gene08833,>LE01Gene01304,>LE01Gene08387,>LE01Gene12401,	0.0552378		Molecular function	oxidoreductase activity	GO:0016491	3	0.000148	1.33847	131	888	767	6959	>LE01Gene06839,>LE01Gene13123,>LE01Gene02450,>LE01Gene01123,>LE01Gene04224,>LE01Gene06893,>LE01Gene06865,>LE01Gene04206,>LE01Gene01549,>LE01Gene01553,>LE01Gene12240,>LE01Gene11394,>LE01Gene01567,>LE01Gene01574,>LE01Gene02429,>LE01Gene11377,>LE01Gene09065,>LE01Gene09434,>LE01Gene09887,>LE01Gene08137,>LE01Gene00669,>LE01Gene07270,>LE01Gene11772,>LE01Gene06312,>LE01Gene05475,>LE01Gene06332,>LE01Gene…	0.00179535
Molecular function	amino acid transmembrane transporter activity	GO:0015171	6	0.00487981	2.39833	10	26	1116	6959	>LE01Gene12209,>LE01Gene08151,>LE01Gene03637,>LE01Gene07118,>LE01Gene04028,>LE01Gene07949,>LE01Gene06516,>LE01Gene04797,>LE01Gene01666,>LE01Gene03390,	0.0565031		Molecular function	structural constituent of cell wall	GO:0005199	3	0.000329	4.53651	7	14	767	6959	>LE01Gene13539,>LE01Gene13506,>LE01Gene13552,>LE01Gene13554,>LE01Gene10826,>LE01Gene08487,>LE01Gene03013,	0.00389711
Molecular function	organic acid transmembrane transporter activity	GO:0005342	4	0.00665698	2.3095	10	27	1116	6959	>LE01Gene12209,>LE01Gene08151,>LE01Gene03637,>LE01Gene07118,>LE01Gene04028,>LE01Gene07949,>LE01Gene06516,>LE01Gene04797,>LE01Gene01666,>LE01Gene03390,	0.0757518		Molecular function	microtubule motor activity	GO:0003777	3	0.000334	4.03245	8	18	767	6959	>LE01Gene05546,>LE01Gene05437,>LE01Gene11633,>LE01Gene12981,>LE01Gene00049,>LE01Gene03108,>LE01Gene00089,>LE01Gene00757,	0.0038897
Molecular function	carboxylic acid transmembrane transporter activity	GO:0046943	5	0.00665698	2.3095	10	27	1116	6959	>LE01Gene12209,>LE01Gene08151,>LE01Gene03637,>LE01Gene07118,>LE01Gene04028,>LE01Gene07949,>LE01Gene06516,>LE01Gene04797,>LE01Gene01666,>LE01Gene03390,	0.0757518		Molecular function	nucleoside binding	GO:0001882	4	0.000341	1.95419	28	130	767	6959	>LE01Gene03365,>LE01Gene03345,>LE01Gene10030,>LE01Gene08138,>LE01Gene07689,>LE01Gene01018,>LE01Gene01429,>LE01Gene01434,>LE01Gene01435,>LE01Gene01831,>LE01Gene10330,>LE01Gene09341,>LE01Gene10717,>LE01Gene08828,>LE01Gene05769,>LE01Gene04803,>LE01Gene11519,>LE01Gene13732,>LE01Gene10687,>LE01Gene03067,>LE01Gene00801,>LE01Gene05610,>LE01Gene03467,>LE01Gene05197,>LE01Gene08622,>LE01Gene07300,>LE01Gene…	0.00389159
Molecular function	catalytic activity, acting on a tRNA	GO:0140101	5	0.00695365	1.81035	18	62	1116	6959	>LE01Gene01520,>LE01Gene10058,>LE01Gene01963,>LE01Gene07674,>LE01Gene04519,>LE01Gene00166,>LE01Gene03256,>LE01Gene01438,>LE01Gene01477,>LE01Gene10765,>LE01Gene08833,>LE01Gene12908,>LE01Gene02239,>LE01Gene01304,>LE01Gene08387,>LE01Gene12401,>LE01Gene03859,>LE01Gene10914,	0.0764901		Molecular function	protein heterodimerization activity	GO:0046982	5	0.0004	2.9426	12	37	767	6959	>LE01Gene01532,>LE01Gene09820,>LE01Gene12144,>LE01Gene08055,>LE01Gene13783,>LE01Gene13301,>LE01Gene13300,>LE01Gene13784,>LE01Gene05299,>LE01Gene03840,>LE01Gene03839,>LE01Gene00778,	0.00448471
Molecular function	deaminase activity	GO:0019239	4	0.00806122	2.7281	7	16	1116	6959	>LE01Gene06818,>LE01Gene07739,>LE01Gene04192,>LE01Gene04567,>LE01Gene03131,>LE01Gene03132,>LE01Gene09127,	0.085813		Molecular function	ATPase activity, coupled to transmembrane movement of ions, rotational mechanism	GO:0044769	8	0.000498	4.94892	6	11	767	6959	>LE01Gene13008,>LE01Gene01885,>LE01Gene03585,>LE01Gene06610,>LE01Gene01780,>LE01Gene03007,	0.00548238
Molecular function	magnesium ion binding	GO:0000287	6	0.00860818	1.93998	14	45	1116	6959	>LE01Gene13156,>LE01Gene01520,>LE01Gene01586,>LE01Gene02892,>LE01Gene12136,>LE01Gene08939,>LE01Gene09790,>LE01Gene03564,>LE01Gene05711,>LE01Gene03056,>LE01Gene06537,>LE01Gene04720,>LE01Gene11499,>LE01Gene07329,	0.0901809		Molecular function	ribonucleoside binding	GO:0032549	5	0.000612	1.91384	27	128	767	6959	>LE01Gene03365,>LE01Gene03345,>LE01Gene10030,>LE01Gene08138,>LE01Gene07689,>LE01Gene01018,>LE01Gene01429,>LE01Gene01434,>LE01Gene01435,>LE01Gene01831,>LE01Gene10330,>LE01Gene09341,>LE01Gene10717,>LE01Gene08828,>LE01Gene05769,>LE01Gene04803,>LE01Gene11519,>LE01Gene13732,>LE01Gene10687,>LE01Gene03067,>LE01Gene00801,>LE01Gene05610,>LE01Gene03467,>LE01Gene05197,>LE01Gene08622,>LE01Gene07300,>LE01Gene…	0.00660862
Molecular function	hydrolase activity, acting on carbon-nitrogen (but not peptide) bonds, in linear amides	GO:0016811	5	0.00882722	2.49427	8	20	1116	6959	>LE01Gene09080,>LE01Gene00645,>LE01Gene05870,>LE01Gene12490,>LE01Gene12831,>LE01Gene11524,>LE01Gene06090,>LE01Gene06091,	0.0910307		Molecular function	ATP-dependent activity, acting on DNA	GO:0008094	5	0.000692	2.37981	16	61	767	6959	>LE01Gene03366,>LE01Gene10059,>LE01Gene02413,>LE01Gene00240,>LE01Gene08526,>LE01Gene02350,>LE01Gene08065,>LE01Gene00959,>LE01Gene11651,>LE01Gene07551,>LE01Gene00925,>LE01Gene06642,>LE01Gene02290,>LE01Gene13321,>LE01Gene03094,>LE01Gene06943,	0.00734773
Molecular function	organic anion transmembrane transporter activity	GO:0008514	6	0.00889741	2.22702	10	28	1116	6959	>LE01Gene12209,>LE01Gene08151,>LE01Gene03637,>LE01Gene07118,>LE01Gene04028,>LE01Gene07949,>LE01Gene06516,>LE01Gene04797,>LE01Gene01666,>LE01Gene03390,	0.0903429		Molecular function	GTP binding	GO:0005525	9	0.000843	1.90241	26	124	767	6959	>LE01Gene03365,>LE01Gene03345,>LE01Gene10030,>LE01Gene08138,>LE01Gene01018,>LE01Gene01429,>LE01Gene01434,>LE01Gene01435,>LE01Gene01831,>LE01Gene10330,>LE01Gene09341,>LE01Gene10717,>LE01Gene08828,>LE01Gene05769,>LE01Gene04803,>LE01Gene11519,>LE01Gene13732,>LE01Gene10687,>LE01Gene03067,>LE01Gene00801,>LE01Gene05610,>LE01Gene03467,>LE01Gene05197,>LE01Gene08622,>LE01Gene07300,>LE01Gene09510,	0.00879081
Molecular function	oxidoreductase activity, acting on peroxide as acceptor	GO:0016684	4	0.0102196	2.02238	12	37	1116	6959	>LE01Gene09060,>LE01Gene10877,>LE01Gene08991,>LE01Gene08997,>LE01Gene01844,>LE01Gene04499,>LE01Gene03530,>LE01Gene10614,>LE01Gene02143,>LE01Gene04245,>LE01Gene08669,>LE01Gene08639,	0.102196		Molecular function	purine ribonucleoside binding	GO:0032550	6	0.000843	1.90241	26	124	767	6959	>LE01Gene03365,>LE01Gene03345,>LE01Gene10030,>LE01Gene08138,>LE01Gene01018,>LE01Gene01429,>LE01Gene01434,>LE01Gene01435,>LE01Gene01831,>LE01Gene10330,>LE01Gene09341,>LE01Gene10717,>LE01Gene08828,>LE01Gene05769,>LE01Gene04803,>LE01Gene11519,>LE01Gene13732,>LE01Gene10687,>LE01Gene03067,>LE01Gene00801,>LE01Gene05610,>LE01Gene03467,>LE01Gene05197,>LE01Gene08622,>LE01Gene07300,>LE01Gene09510,	0.00879081
Molecular function	peroxidase activity	GO:0004601	5	0.0102196	2.02238	12	37	1116	6959	>LE01Gene09060,>LE01Gene10877,>LE01Gene08991,>LE01Gene08997,>LE01Gene01844,>LE01Gene04499,>LE01Gene03530,>LE01Gene10614,>LE01Gene02143,>LE01Gene04245,>LE01Gene08669,>LE01Gene08639,	0.102196		Molecular function	guanyl ribonucleotide binding	GO:0032561	8	0.000843	1.90241	26	124	767	6959	>LE01Gene03365,>LE01Gene03345,>LE01Gene10030,>LE01Gene08138,>LE01Gene01018,>LE01Gene01429,>LE01Gene01434,>LE01Gene01435,>LE01Gene01831,>LE01Gene10330,>LE01Gene09341,>LE01Gene10717,>LE01Gene08828,>LE01Gene05769,>LE01Gene04803,>LE01Gene11519,>LE01Gene13732,>LE01Gene10687,>LE01Gene03067,>LE01Gene00801,>LE01Gene05610,>LE01Gene03467,>LE01Gene05197,>LE01Gene08622,>LE01Gene07300,>LE01Gene09510,	0.00879081
Molecular function	transferase activity, transferring one-carbon groups	GO:0016741	4	0.0127359	1.48697	31	130	1116	6959	>LE01Gene08162,>LE01Gene12238,>LE01Gene01116,>LE01Gene12211,>LE01Gene00622,>LE01Gene13914,>LE01Gene12646,>LE01Gene04537,>LE01Gene04544,>LE01Gene04998,>LE01Gene06703,>LE01Gene08910,>LE01Gene13031,>LE01Gene01423,>LE01Gene03607,>LE01Gene09304,>LE01Gene01869,>LE01Gene07500,>LE01Gene05330,>LE01Gene09724,>LE01Gene11180,>LE01Gene13774,>LE01Gene11541,>LE01Gene11948,>LE01Gene12355,>LE01Gene09181,>LE01Gene…	0.123613		Molecular function	purine nucleoside binding	GO:0001883	5	0.000843	1.90241	26	124	767	6959	>LE01Gene03365,>LE01Gene03345,>LE01Gene10030,>LE01Gene08138,>LE01Gene01018,>LE01Gene01429,>LE01Gene01434,>LE01Gene01435,>LE01Gene01831,>LE01Gene10330,>LE01Gene09341,>LE01Gene10717,>LE01Gene08828,>LE01Gene05769,>LE01Gene04803,>LE01Gene11519,>LE01Gene13732,>LE01Gene10687,>LE01Gene03067,>LE01Gene00801,>LE01Gene05610,>LE01Gene03467,>LE01Gene05197,>LE01Gene08622,>LE01Gene07300,>LE01Gene09510,	0.00879081
Molecular function	methyltransferase activity	GO:0008168	5	0.012894	1.49656	30	125	1116	6959	>LE01Gene08162,>LE01Gene12238,>LE01Gene01116,>LE01Gene12211,>LE01Gene00622,>LE01Gene13914,>LE01Gene12646,>LE01Gene04537,>LE01Gene04544,>LE01Gene04998,>LE01Gene06703,>LE01Gene08910,>LE01Gene13031,>LE01Gene01423,>LE01Gene03607,>LE01Gene09304,>LE01Gene01869,>LE01Gene07500,>LE01Gene09724,>LE01Gene11180,>LE01Gene13774,>LE01Gene11541,>LE01Gene11948,>LE01Gene12355,>LE01Gene09181,>LE01Gene05106,>LE01Gene…	0.123334		Molecular function	cation channel activity	GO:0005261	7	0.000904	4.53651	6	12	767	6959	>LE01Gene13008,>LE01Gene01885,>LE01Gene03585,>LE01Gene06610,>LE01Gene01780,>LE01Gene03007,	0.00882396
Molecular function	oxidoreductase activity, acting on the aldehyde or oxo group of donors, NAD or NADP as acceptor	GO:0016620	5	0.01601	2.1585	9	26	1116	6959	>LE01Gene01966,>LE01Gene05481,>LE01Gene09818,>LE01Gene07114,>LE01Gene04469,>LE01Gene03960,>LE01Gene06992,>LE01Gene12309,>LE01Gene08279,	0.144748		Molecular function	ATPase-coupled cation transmembrane transporter activity	GO:0019829	7	0.000913	3.26628	9	25	767	6959	>LE01Gene12618,>LE01Gene13008,>LE01Gene01885,>LE01Gene03585,>LE01Gene06610,>LE01Gene01780,>LE01Gene03007,>LE01Gene11842,>LE01Gene05183,	0.00876599
Molecular function	translation elongation factor activity	GO:0003746	7	0.0228285	2.49427	6	15	1116	6959	>LE01Gene12685,>LE01Gene06351,>LE01Gene06725,>LE01Gene03252,>LE01Gene07174,>LE01Gene05679,	0.203605		Molecular function	ATPase-coupled ion transmembrane transporter activity	GO:0042625	7	0.000913	3.26628	9	25	767	6959	>LE01Gene12618,>LE01Gene13008,>LE01Gene01885,>LE01Gene03585,>LE01Gene06610,>LE01Gene01780,>LE01Gene03007,>LE01Gene11842,>LE01Gene05183,	0.00876599
Molecular function	oxidoreductase activity, acting on single donors with incorporation of molecular oxygen	GO:0016701	4	0.0229261	2.29735	7	19	1116	6959	>LE01Gene04116,>LE01Gene02634,>LE01Gene09227,>LE01Gene05229,>LE01Gene06122,>LE01Gene11953,>LE01Gene02142,	0.20175		Molecular function	hydrolase activity	GO:0016787	3	0.00120408	1.21409	186	1390	767	6959	>LE01Gene01153,>LE01Gene05510,>LE01Gene02458,>LE01Gene12259,>LE01Gene13119,>LE01Gene03366,>LE01Gene03365,>LE01Gene05546,>LE01Gene02017,>LE01Gene00690,>LE01Gene00226,>LE01Gene13505,>LE01Gene00208,>LE01Gene10059,>LE01Gene06801,>LE01Gene10066,>LE01Gene13578,>LE01Gene00230,>LE01Gene02413,>LE01Gene01567,>LE01Gene10030,>LE01Gene12213,>LE01Gene00240,>LE01Gene00614,>LE01Gene11755,>LE01Gene09889,>LE01Gene…	0.0112072
Molecular function	glycosyltransferase activity	GO:0016757	4	0.024053	1.48468	25	105	1116	6959	>LE01Gene13132,>LE01Gene06881,>LE01Gene13510,>LE01Gene02420,>LE01Gene06379,>LE01Gene00638,>LE01Gene01422,>LE01Gene13404,>LE01Gene00561,>LE01Gene12571,>LE01Gene11247,>LE01Gene11248,>LE01Gene08018,>LE01Gene10334,>LE01Gene02724,>LE01Gene00996,>LE01Gene12908,>LE01Gene02239,>LE01Gene13733,>LE01Gene13736,>LE01Gene03859,>LE01Gene10152,>LE01Gene09114,>LE01Gene07329,>LE01Gene07316,	0.208882		Molecular function	tubulin binding	GO:0015631	5	0.00138269	3.73595	7	17	767	6959	>LE01Gene05546,>LE01Gene05437,>LE01Gene12981,>LE01Gene03108,>LE01Gene00089,>LE01Gene09135,>LE01Gene00757,	0.0123018
Molecular function	isomerase activity	GO:0016853	3	0.0284174	1.53967	20	81	1116	6959	>LE01Gene06846,>LE01Gene01199,>LE01Gene04192,>LE01Gene08939,>LE01Gene12197,>LE01Gene11222,>LE01Gene11685,>LE01Gene09790,>LE01Gene03184,>LE01Gene08877,>LE01Gene01388,>LE01Gene14216,>LE01Gene09277,>LE01Gene02677,>LE01Gene03058,>LE01Gene10194,>LE01Gene03017,>LE01Gene01640,>LE01Gene10176,>LE01Gene05567,	0.199526		Molecular function	microtubule binding	GO:0008017	6	0.00138269	3.73595	7	17	767	6959	>LE01Gene05546,>LE01Gene05437,>LE01Gene12981,>LE01Gene03108,>LE01Gene00089,>LE01Gene09135,>LE01Gene00757,	0.0123018
Molecular function	antioxidant activity	GO:0016209	2	0.0298714	1.72476	13	47	1116	6959	>LE01Gene09060,>LE01Gene10877,>LE01Gene08991,>LE01Gene08997,>LE01Gene10767,>LE01Gene01844,>LE01Gene04499,>LE01Gene03530,>LE01Gene10614,>LE01Gene02143,>LE01Gene04245,>LE01Gene08669,>LE01Gene08639,	0.207528		Molecular function	ligase activity, forming phosphoric ester bonds	GO:0016886	4	0.0013834	5.04056	5	9	767	6959	>LE01Gene09820,>LE01Gene10827,>LE01Gene08949,>LE01Gene05332,>LE01Gene03142,	0.0119566
Molecular function	oxidoreductase activity, acting on the CH-NH2 group of donors, oxygen as acceptor	GO:0016641	5	0.0440514	2.39833	5	13	1116	6959	>LE01Gene06854,>LE01Gene01873,>LE01Gene04056,>LE01Gene04738,>LE01Gene06092,	0.293676		Molecular function	guanyl nucleotide binding	GO:0019001	7	0.00154974	1.82867	26	129	767	6959	>LE01Gene03365,>LE01Gene03345,>LE01Gene10030,>LE01Gene08138,>LE01Gene01018,>LE01Gene01429,>LE01Gene01434,>LE01Gene01435,>LE01Gene01831,>LE01Gene10330,>LE01Gene09341,>LE01Gene10717,>LE01Gene08828,>LE01Gene05769,>LE01Gene04803,>LE01Gene11519,>LE01Gene13732,>LE01Gene10687,>LE01Gene03067,>LE01Gene00801,>LE01Gene05610,>LE01Gene03467,>LE01Gene05197,>LE01Gene08622,>LE01Gene07300,>LE01Gene09510,	0.0132055
Molecular function	intramolecular oxidoreductase activity	GO:0016860	4	0.0440514	2.39833	5	13	1116	6959	>LE01Gene04192,>LE01Gene11222,>LE01Gene03017,>LE01Gene01640,>LE01Gene05567,	0.293676		Molecular function	ATPase-coupled transmembrane transporter activity	GO:0042626	6	0.00172505	2.19952	16	66	767	6959	>LE01Gene01153,>LE01Gene08571,>LE01Gene12618,>LE01Gene13008,>LE01Gene11221,>LE01Gene01885,>LE01Gene08419,>LE01Gene03585,>LE01Gene06610,>LE01Gene01780,>LE01Gene01735,>LE01Gene03007,>LE01Gene09163,>LE01Gene00359,>LE01Gene11842,>LE01Gene05183,	0.0144952
Molecular function	anion transmembrane transporter activity	GO:0008509	5	0.0455232	1.71481	11	40	1116	6959	>LE01Gene12209,>LE01Gene08151,>LE01Gene03637,>LE01Gene07118,>LE01Gene04028,>LE01Gene07949,>LE01Gene13397,>LE01Gene06516,>LE01Gene04797,>LE01Gene01666,>LE01Gene03390,	0.297478		Molecular function	transferase activity	GO:0016740	3	0.00188798	1.23145	155	1142	767	6959	>LE01Gene01135,>LE01Gene01193,>LE01Gene02494,>LE01Gene13145,>LE01Gene06866,>LE01Gene14484,>LE01Gene01183,>LE01Gene01184,>LE01Gene02875,>LE01Gene01541,>LE01Gene00216,>LE01Gene09035,>LE01Gene01523,>LE01Gene13988,>LE01Gene12662,>LE01Gene01107,>LE01Gene10065,>LE01Gene11371,>LE01Gene00613,>LE01Gene09436,>LE01Gene08573,>LE01Gene10887,>LE01Gene00667,>LE01Gene10461,>LE01Gene02814,>LE01Gene00640,>LE01Gene…	0.0152297
Cellular component	integral component of membrane	GO:0016021	4	2e-13	1.77039	123	662	299	2849	>LE01Gene05504,>LE01Gene06812,>LE01Gene11341,>LE01Gene02405,>LE01Gene12209,>LE01Gene08162,>LE01Gene00682,>LE01Gene00206,>LE01Gene11335,>LE01Gene05946,>LE01Gene01564,>LE01Gene02419,>LE01Gene02420,>LE01Gene05932,>LE01Gene09437,>LE01Gene09443,>LE01Gene08555,>LE01Gene11737,>LE01Gene11300,>LE01Gene12647,>LE01Gene08151,>LE01Gene04136,>LE01Gene13090,>LE01Gene04140,>LE01Gene06781,>LE01Gene06340,>LE01Gene…	3.65e-11		Molecular function	prenyltransferase activity	GO:0004659	5	0.00242033	3.88843	6	14	767	6959	>LE01Gene09436,>LE01Gene05036,>LE01Gene10315,>LE01Gene07511,>LE01Gene04870,>LE01Gene07419,	0.0192671
Cellular component	intrinsic component of membrane	GO:0031224	3	2.26e-13	1.76772	123	663	299	2849	>LE01Gene05504,>LE01Gene06812,>LE01Gene11341,>LE01Gene02405,>LE01Gene12209,>LE01Gene08162,>LE01Gene00682,>LE01Gene00206,>LE01Gene11335,>LE01Gene05946,>LE01Gene01564,>LE01Gene02419,>LE01Gene02420,>LE01Gene05932,>LE01Gene09437,>LE01Gene09443,>LE01Gene08555,>LE01Gene11737,>LE01Gene11300,>LE01Gene12647,>LE01Gene08151,>LE01Gene04136,>LE01Gene13090,>LE01Gene04140,>LE01Gene06781,>LE01Gene06340,>LE01Gene…	2.07e-11		Molecular function	ATP hydrolysis activity	GO:0016887	8	0.00281637	1.69753	29	155	767	6959	>LE01Gene01153,>LE01Gene06801,>LE01Gene10066,>LE01Gene02413,>LE01Gene00240,>LE01Gene08571,>LE01Gene12618,>LE01Gene13008,>LE01Gene11221,>LE01Gene01885,>LE01Gene00959,>LE01Gene07551,>LE01Gene10711,>LE01Gene00925,>LE01Gene00049,>LE01Gene06642,>LE01Gene03585,>LE01Gene06610,>LE01Gene01780,>LE01Gene13321,>LE01Gene01735,>LE01Gene11915,>LE01Gene03094,>LE01Gene03423,>LE01Gene06943,>LE01Gene03007,>LE01Gene…	0.0221286
Cellular component	obsolete membrane part	GO:0044425	0	9.61e-10	1.57958	124	748	299	2849	>LE01Gene05504,>LE01Gene06812,>LE01Gene11341,>LE01Gene02405,>LE01Gene12209,>LE01Gene08162,>LE01Gene00682,>LE01Gene00206,>LE01Gene11335,>LE01Gene05946,>LE01Gene01564,>LE01Gene02419,>LE01Gene02420,>LE01Gene05932,>LE01Gene09437,>LE01Gene09443,>LE01Gene08555,>LE01Gene11737,>LE01Gene11300,>LE01Gene12647,>LE01Gene08151,>LE01Gene04136,>LE01Gene13090,>LE01Gene04140,>LE01Gene06781,>LE01Gene06340,>LE01Gene…	5.86e-08		Molecular function	DNA helicase activity	GO:0003678	6	0.0040751	2.22546	13	53	767	6959	>LE01Gene03366,>LE01Gene10059,>LE01Gene00240,>LE01Gene08526,>LE01Gene02350,>LE01Gene08065,>LE01Gene00959,>LE01Gene11651,>LE01Gene07551,>LE01Gene00925,>LE01Gene06642,>LE01Gene02290,>LE01Gene06943,	0.031208
Cellular component	membrane	GO:0016020	3	3e-09	1.4525	150	984	299	2849	>LE01Gene05504,>LE01Gene06812,>LE01Gene11341,>LE01Gene02405,>LE01Gene12209,>LE01Gene10475,>LE01Gene08162,>LE01Gene00682,>LE01Gene00206,>LE01Gene11335,>LE01Gene05946,>LE01Gene01564,>LE01Gene02419,>LE01Gene02420,>LE01Gene05932,>LE01Gene09437,>LE01Gene09443,>LE01Gene08555,>LE01Gene11737,>LE01Gene11300,>LE01Gene00668,>LE01Gene12647,>LE01Gene08151,>LE01Gene00636,>LE01Gene04136,>LE01Gene13090,>LE01Gene…	1.37e-07		Molecular function	serine-type endopeptidase activity	GO:0004252	6	0.00409823	2.90336	8	25	767	6959	>LE01Gene09308,>LE01Gene06272,>LE01Gene10711,>LE01Gene05384,>LE01Gene00433,>LE01Gene00362,>LE01Gene00723,>LE01Gene14073,	0.0309929
Cellular component	cytosol	GO:0005829	3	0.00266338	2.85853	9	30	299	2849	>LE01Gene03342,>LE01Gene02434,>LE01Gene02832,>LE01Gene09805,>LE01Gene13891,>LE01Gene01407,>LE01Gene04720,>LE01Gene02095,>LE01Gene04299,	0.0974798		Molecular function	cytoskeletal motor activity	GO:0003774	2	0.00409823	2.90336	8	25	767	6959	>LE01Gene05546,>LE01Gene05437,>LE01Gene11633,>LE01Gene12981,>LE01Gene00049,>LE01Gene03108,>LE01Gene00089,>LE01Gene00757,	0.0309929
Cellular component	extracellular region	GO:0005576	3	0.00285329	2.2233	14	60	299	2849	>LE01Gene13508,>LE01Gene09060,>LE01Gene08997,>LE01Gene06745,>LE01Gene08044,>LE01Gene11282,>LE01Gene10302,>LE01Gene12986,>LE01Gene02639,>LE01Gene01726,>LE01Gene06973,>LE01Gene13684,>LE01Gene11487,>LE01Gene04299,	0.0870253		Molecular function	P-type transmembrane transporter activity	GO:0140358	7	0.00655275	3.78042	5	12	767	6959	>LE01Gene12618,>LE01Gene13008,>LE01Gene01885,>LE01Gene03585,>LE01Gene03007,	0.0460978
Cellular component	cytoplasm	GO:0005737	3	0.0392603	1.16751	93	759	299	2849	>LE01Gene01150,>LE01Gene06846,>LE01Gene10077,>LE01Gene03342,>LE01Gene01164,>LE01Gene12685,>LE01Gene01520,>LE01Gene02854,>LE01Gene00678,>LE01Gene01584,>LE01Gene02434,>LE01Gene01586,>LE01Gene10058,>LE01Gene02420,>LE01Gene09892,>LE01Gene02832,>LE01Gene10455,>LE01Gene01963,>LE01Gene05097,>LE01Gene06329,>LE01Gene10823,>LE01Gene09805,>LE01Gene05457,>LE01Gene06351,>LE01Gene03689,>LE01Gene06725,>LE01Gene…	0.653148		Molecular function	P-type ion transporter activity	GO:0015662	8	0.00655275	3.78042	5	12	767	6959	>LE01Gene12618,>LE01Gene13008,>LE01Gene01885,>LE01Gene03585,>LE01Gene03007,	0.0460978
Biological process	obsolete oxidation-reduction process	GO:0055114	0	2.22e-16	1.90462	251	774	970	5697	>LE01Gene03325,>LE01Gene05507,>LE01Gene13129,>LE01Gene01156,>LE01Gene05518,>LE01Gene13135,>LE01Gene01161,>LE01Gene03303,>LE01Gene04640,>LE01Gene12264,>LE01Gene00290,>LE01Gene05541,>LE01Gene14012,>LE01Gene06854,>LE01Gene14008,>LE01Gene01552,>LE01Gene08192,>LE01Gene08198,>LE01Gene01526,>LE01Gene00683,>LE01Gene13513,>LE01Gene11338,>LE01Gene11339,>LE01Gene00256,>LE01Gene04617,>LE01Gene05946,>LE01Gene…	3.18e-13		Molecular function	rRNA binding	GO:0019843	6	0.00655275	3.78042	5	12	767	6959	>LE01Gene14438,>LE01Gene09867,>LE01Gene02296,>LE01Gene11443,>LE01Gene04253,	0.0460978
Biological process	pyridine-containing compound metabolic process	GO:0072524	5	2.98e-10	2.89524	35	71	970	5697	>LE01Gene13132,>LE01Gene00256,>LE01Gene00628,>LE01Gene06393,>LE01Gene02390,>LE01Gene01422,>LE01Gene11222,>LE01Gene09790,>LE01Gene09791,>LE01Gene07114,>LE01Gene10334,>LE01Gene01873,>LE01Gene04902,>LE01Gene02725,>LE01Gene05356,>LE01Gene14216,>LE01Gene03960,>LE01Gene11106,>LE01Gene02623,>LE01Gene02678,>LE01Gene10632,>LE01Gene03058,>LE01Gene03056,>LE01Gene06597,>LE01Gene03019,>LE01Gene02144,>LE01Gene…	2.13e-07		Molecular function	obsolete cofactor binding	GO:0048037	0	0.0109817	1.29361	73	512	767	6959	>LE01Gene02450,>LE01Gene06866,>LE01Gene02875,>LE01Gene01549,>LE01Gene01574,>LE01Gene11377,>LE01Gene09065,>LE01Gene09434,>LE01Gene11772,>LE01Gene05450,>LE01Gene06357,>LE01Gene01912,>LE01Gene09851,>LE01Gene07683,>LE01Gene05421,>LE01Gene03255,>LE01Gene07617,>LE01Gene04110,>LE01Gene08075,>LE01Gene10351,>LE01Gene01462,>LE01Gene12595,>LE01Gene00118,>LE01Gene09307,>LE01Gene08450,>LE01Gene02706,>LE01Gene…	0.0746507
Biological process	small molecule metabolic process	GO:0044281	3	3.03e-10	1.4963	187	734	970	5697	>LE01Gene04653,>LE01Gene05983,>LE01Gene04654,>LE01Gene13132,>LE01Gene06818,>LE01Gene12254,>LE01Gene00290,>LE01Gene06881,>LE01Gene01199,>LE01Gene07739,>LE01Gene03342,>LE01Gene03348,>LE01Gene04205,>LE01Gene10024,>LE01Gene01520,>LE01Gene13510,>LE01Gene11339,>LE01Gene02434,>LE01Gene01586,>LE01Gene00256,>LE01Gene10058,>LE01Gene10056,>LE01Gene04619,>LE01Gene09080,>LE01Gene00628,>LE01Gene06379,>LE01Gene…	1.45e-07		Molecular function	oxidoreductase activity, acting on the CH-CH group of donors	GO:0016627	4	0.0138235	2.16024	10	42	767	6959	>LE01Gene01123,>LE01Gene05475,>LE01Gene00953,>LE01Gene09743,>LE01Gene00943,>LE01Gene02208,>LE01Gene08705,>LE01Gene01288,>LE01Gene02513,>LE01Gene11013,	0.0804157
Biological process	pyridine nucleotide metabolic process	GO:0019362	9	6.55e-10	2.98321	32	63	970	5697	>LE01Gene13132,>LE01Gene00256,>LE01Gene06393,>LE01Gene02390,>LE01Gene01422,>LE01Gene11222,>LE01Gene09790,>LE01Gene09791,>LE01Gene07114,>LE01Gene10334,>LE01Gene04902,>LE01Gene02725,>LE01Gene05356,>LE01Gene14216,>LE01Gene03960,>LE01Gene11106,>LE01Gene02623,>LE01Gene02678,>LE01Gene10632,>LE01Gene03058,>LE01Gene03056,>LE01Gene06597,>LE01Gene03019,>LE01Gene02144,>LE01Gene02539,>LE01Gene02540,>LE01Gene…	2.35e-07		Molecular function	metallopeptidase activity	GO:0008237	5	0.0139071	2.26825	9	36	767	6959	>LE01Gene09817,>LE01Gene02392,>LE01Gene07593,>LE01Gene09222,>LE01Gene08371,>LE01Gene05212,>LE01Gene00365,>LE01Gene00730,>LE01Gene10548,	0.0801313
Biological process	carbohydrate metabolic process	GO:0005975	4	1.08e-09	1.72933	106	360	970	5697	>LE01Gene04657,>LE01Gene05973,>LE01Gene04647,>LE01Gene12203,>LE01Gene01103,>LE01Gene04612,>LE01Gene00256,>LE01Gene02438,>LE01Gene05083,>LE01Gene05084,>LE01Gene06393,>LE01Gene01999,>LE01Gene13979,>LE01Gene00638,>LE01Gene05090,>LE01Gene09459,>LE01Gene11775,>LE01Gene06326,>LE01Gene07656,>LE01Gene06300,>LE01Gene04192,>LE01Gene11715,>LE01Gene02354,>LE01Gene01001,>LE01Gene08939,>LE01Gene02390,>LE01Gene…	3.1e-07		Molecular function	isomerase activity	GO:0016853	3	0.0141185	1.7922	16	81	767	6959	>LE01Gene13124,>LE01Gene02037,>LE01Gene02019,>LE01Gene01970,>LE01Gene04161,>LE01Gene06350,>LE01Gene08053,>LE01Gene07594,>LE01Gene13321,>LE01Gene03999,>LE01Gene03927,>LE01Gene09550,>LE01Gene07384,>LE01Gene06023,>LE01Gene03399,>LE01Gene11802,	0.0805822
Biological process	nicotinamide nucleotide metabolic process	GO:0046496	10	1.28e-09	3.03786	30	58	970	5697	>LE01Gene00256,>LE01Gene06393,>LE01Gene02390,>LE01Gene01422,>LE01Gene11222,>LE01Gene09790,>LE01Gene09791,>LE01Gene07114,>LE01Gene04902,>LE01Gene02725,>LE01Gene05356,>LE01Gene14216,>LE01Gene03960,>LE01Gene11106,>LE01Gene02623,>LE01Gene02678,>LE01Gene10632,>LE01Gene03058,>LE01Gene03056,>LE01Gene06597,>LE01Gene03019,>LE01Gene02144,>LE01Gene02539,>LE01Gene02540,>LE01Gene04720,>LE01Gene00733,>LE01Gene…	3.06e-07		Molecular function	GTPase activity	GO:0003924	8	0.0172868	1.79073	15	76	767	6959	>LE01Gene03365,>LE01Gene10030,>LE01Gene08138,>LE01Gene01434,>LE01Gene01435,>LE01Gene10330,>LE01Gene10717,>LE01Gene08828,>LE01Gene04803,>LE01Gene11519,>LE01Gene10687,>LE01Gene05610,>LE01Gene03467,>LE01Gene08622,>LE01Gene09510,	0.097743
Biological process	glucose 6-phosphate metabolic process	GO:0051156	6	1.82e-09	4.2287	18	25	970	5697	>LE01Gene00256,>LE01Gene06393,>LE01Gene00638,>LE01Gene11222,>LE01Gene09790,>LE01Gene04902,>LE01Gene02725,>LE01Gene11106,>LE01Gene02623,>LE01Gene02678,>LE01Gene10632,>LE01Gene03058,>LE01Gene06597,>LE01Gene02144,>LE01Gene00733,>LE01Gene10999,>LE01Gene01623,>LE01Gene05567,	3.73e-07		Molecular function	DNA-directed DNA polymerase activity	GO:0003887	7	0.0175538	2.7219	6	20	767	6959	>LE01Gene00640,>LE01Gene04172,>LE01Gene12179,>LE01Gene03549,>LE01Gene05682,>LE01Gene07785,	0.0983338
Biological process	NADPH regeneration	GO:0006740	12	7.83e-09	4.16018	17	24	970	5697	>LE01Gene00256,>LE01Gene06393,>LE01Gene11222,>LE01Gene09790,>LE01Gene04902,>LE01Gene02725,>LE01Gene11106,>LE01Gene02623,>LE01Gene02678,>LE01Gene10632,>LE01Gene03058,>LE01Gene06597,>LE01Gene02144,>LE01Gene00733,>LE01Gene10999,>LE01Gene01623,>LE01Gene05567,	1.4e-06		Molecular function	metalloendopeptidase activity	GO:0004222	6	0.0187756	3.02434	5	15	767	6959	>LE01Gene02392,>LE01Gene07593,>LE01Gene05212,>LE01Gene00365,>LE01Gene00730,	0.102335
Biological process	glyceraldehyde-3-phosphate metabolic process	GO:0019682	6	7.83e-09	4.16018	17	24	970	5697	>LE01Gene00256,>LE01Gene06393,>LE01Gene11222,>LE01Gene09790,>LE01Gene04902,>LE01Gene02725,>LE01Gene11106,>LE01Gene02623,>LE01Gene02678,>LE01Gene10632,>LE01Gene03058,>LE01Gene06597,>LE01Gene02144,>LE01Gene00733,>LE01Gene10999,>LE01Gene01623,>LE01Gene05567,	1.4e-06		Molecular function	iron-sulfur cluster binding	GO:0051536	4	0.0197324	2.14887	9	38	767	6959	>LE01Gene02450,>LE01Gene09851,>LE01Gene08075,>LE01Gene08432,>LE01Gene05778,>LE01Gene02208,>LE01Gene02186,>LE01Gene05255,>LE01Gene02945,	0.10659
Biological process	pentose-phosphate shunt	GO:0006098	13	7.83e-09	4.16018	17	24	970	5697	>LE01Gene00256,>LE01Gene06393,>LE01Gene11222,>LE01Gene09790,>LE01Gene04902,>LE01Gene02725,>LE01Gene11106,>LE01Gene02623,>LE01Gene02678,>LE01Gene10632,>LE01Gene03058,>LE01Gene06597,>LE01Gene02144,>LE01Gene00733,>LE01Gene10999,>LE01Gene01623,>LE01Gene05567,	1.4e-06		Molecular function	metal cluster binding	GO:0051540	3	0.0197324	2.14887	9	38	767	6959	>LE01Gene02450,>LE01Gene09851,>LE01Gene08075,>LE01Gene08432,>LE01Gene05778,>LE01Gene02208,>LE01Gene02186,>LE01Gene05255,>LE01Gene02945,	0.10659
Biological process	cellular aldehyde metabolic process	GO:0006081	4	2.44e-08	2.99418	26	51	970	5697	>LE01Gene00256,>LE01Gene09080,>LE01Gene06393,>LE01Gene01966,>LE01Gene11222,>LE01Gene09790,>LE01Gene07108,>LE01Gene01873,>LE01Gene04902,>LE01Gene02725,>LE01Gene11106,>LE01Gene02623,>LE01Gene02678,>LE01Gene00476,>LE01Gene10632,>LE01Gene03058,>LE01Gene06597,>LE01Gene02144,>LE01Gene12309,>LE01Gene00733,>LE01Gene10999,>LE01Gene01623,>LE01Gene06090,>LE01Gene06091,>LE01Gene05567,>LE01Gene05579,	3.18e-06		Molecular function	magnesium ion binding	GO:0000287	6	0.022174	2.01622	10	45	767	6959	>LE01Gene03365,>LE01Gene01549,>LE01Gene01574,>LE01Gene05421,>LE01Gene05820,>LE01Gene10312,>LE01Gene03156,>LE01Gene08313,>LE01Gene01288,>LE01Gene13693,	0.117678
Biological process	NADP metabolic process	GO:0006739	11	5.01e-08	3.84017	17	26	970	5697	>LE01Gene00256,>LE01Gene06393,>LE01Gene11222,>LE01Gene09790,>LE01Gene04902,>LE01Gene02725,>LE01Gene11106,>LE01Gene02623,>LE01Gene02678,>LE01Gene10632,>LE01Gene03058,>LE01Gene06597,>LE01Gene02144,>LE01Gene00733,>LE01Gene10999,>LE01Gene01623,>LE01Gene05567,	5.99e-06		Molecular function	ion binding	GO:0043167	3	0.0230517	1.09846	281	2321	767	6959	>LE01Gene06839,>LE01Gene01153,>LE01Gene02450,>LE01Gene00276,>LE01Gene02458,>LE01Gene03366,>LE01Gene03365,>LE01Gene05546,>LE01Gene02038,>LE01Gene06400,>LE01Gene05520,>LE01Gene02017,>LE01Gene03345,>LE01Gene06865,>LE01Gene06866,>LE01Gene01183,>LE01Gene01184,>LE01Gene10017,>LE01Gene02875,>LE01Gene01549,>LE01Gene09035,>LE01Gene00208,>LE01Gene12662,>LE01Gene10059,>LE01Gene06801,>LE01Gene10066,>LE01Gene…	0.121272
Biological process	obsolete oxidoreduction coenzyme metabolic process	GO:0006733	0	7.66e-08	2.51708	33	77	970	5697	>LE01Gene13132,>LE01Gene00256,>LE01Gene06393,>LE01Gene02390,>LE01Gene01422,>LE01Gene11222,>LE01Gene09790,>LE01Gene09791,>LE01Gene11602,>LE01Gene07114,>LE01Gene10334,>LE01Gene04902,>LE01Gene02725,>LE01Gene05356,>LE01Gene14216,>LE01Gene03960,>LE01Gene11106,>LE01Gene02623,>LE01Gene02678,>LE01Gene10632,>LE01Gene03058,>LE01Gene03056,>LE01Gene06597,>LE01Gene03019,>LE01Gene02144,>LE01Gene02539,>LE01Gene…	8.45e-06		Molecular function	protein dimerization activity	GO:0046983	4	0.0260289	1.78711	13	66	767	6959	>LE01Gene01532,>LE01Gene09820,>LE01Gene12144,>LE01Gene08055,>LE01Gene13783,>LE01Gene13301,>LE01Gene13300,>LE01Gene13784,>LE01Gene05299,>LE01Gene03840,>LE01Gene03839,>LE01Gene00741,>LE01Gene00778,	0.132332
Biological process	monosaccharide metabolic process	GO:0005996	5	3.01e-07	2.51708	30	70	970	5697	>LE01Gene06393,>LE01Gene01999,>LE01Gene00638,>LE01Gene11775,>LE01Gene02390,>LE01Gene11222,>LE01Gene09790,>LE01Gene07114,>LE01Gene04902,>LE01Gene04060,>LE01Gene08877,>LE01Gene14216,>LE01Gene03960,>LE01Gene02678,>LE01Gene08397,>LE01Gene09692,>LE01Gene13706,>LE01Gene03056,>LE01Gene06597,>LE01Gene11927,>LE01Gene03017,>LE01Gene03019,>LE01Gene00332,>LE01Gene04720,>LE01Gene00733,>LE01Gene01623,>LE01Gene…	3.08e-05		Molecular function	transferase activity, transferring one-carbon groups	GO:0016741	4	0.0262152	1.53543	22	130	767	6959	>LE01Gene13145,>LE01Gene14484,>LE01Gene01523,>LE01Gene10887,>LE01Gene01014,>LE01Gene03658,>LE01Gene12036,>LE01Gene11176,>LE01Gene03965,>LE01Gene01309,>LE01Gene13331,>LE01Gene00860,>LE01Gene12855,>LE01Gene05248,>LE01Gene02146,>LE01Gene05661,>LE01Gene00780,>LE01Gene11414,>LE01Gene04255,>LE01Gene04235,>LE01Gene10911,>LE01Gene05162,	0.132168
Biological process	monocarboxylic acid metabolic process	GO:0032787	7	4.29e-07	2.04672	46	132	970	5697	>LE01Gene00256,>LE01Gene10056,>LE01Gene09080,>LE01Gene01966,>LE01Gene08952,>LE01Gene01907,>LE01Gene02390,>LE01Gene01423,>LE01Gene11222,>LE01Gene01407,>LE01Gene04966,>LE01Gene09790,>LE01Gene07108,>LE01Gene07114,>LE01Gene04902,>LE01Gene14216,>LE01Gene01364,>LE01Gene03960,>LE01Gene09272,>LE01Gene12831,>LE01Gene10632,>LE01Gene03045,>LE01Gene03056,>LE01Gene02192,>LE01Gene06597,>LE01Gene05620,>LE01Gene…	4.1e-05		Molecular function	catalytic activity, acting on DNA	GO:0140097	4	0.027407	1.4378	29	183	767	6959	>LE01Gene13119,>LE01Gene03366,>LE01Gene10059,>LE01Gene02413,>LE01Gene00240,>LE01Gene00640,>LE01Gene08526,>LE01Gene04172,>LE01Gene02350,>LE01Gene12179,>LE01Gene08065,>LE01Gene01474,>LE01Gene00959,>LE01Gene10312,>LE01Gene11651,>LE01Gene05332,>LE01Gene07551,>LE01Gene00925,>LE01Gene03549,>LE01Gene06642,>LE01Gene02290,>LE01Gene03142,>LE01Gene13321,>LE01Gene03927,>LE01Gene00874,>LE01Gene03094,>LE01Gene…	0.137035
Biological process	small molecule biosynthetic process	GO:0044283	4	6.52e-07	1.74205	70	236	970	5697	>LE01Gene05983,>LE01Gene00290,>LE01Gene06881,>LE01Gene03342,>LE01Gene10024,>LE01Gene01520,>LE01Gene02434,>LE01Gene10056,>LE01Gene00628,>LE01Gene01963,>LE01Gene06329,>LE01Gene08952,>LE01Gene01907,>LE01Gene07681,>LE01Gene02397,>LE01Gene01078,>LE01Gene02390,>LE01Gene01423,>LE01Gene11222,>LE01Gene13891,>LE01Gene01407,>LE01Gene01477,>LE01Gene09790,>LE01Gene11602,>LE01Gene07114,>LE01Gene10765,>LE01Gene…	5.84e-05		Molecular function	ligase activity	GO:0016874	3	0.031968	1.46339	25	155	767	6959	>LE01Gene10017,>LE01Gene01992,>LE01Gene11776,>LE01Gene09820,>LE01Gene10827,>LE01Gene13008,>LE01Gene08949,>LE01Gene01885,>LE01Gene09305,>LE01Gene05332,>LE01Gene02226,>LE01Gene03142,>LE01Gene03585,>LE01Gene06610,>LE01Gene01780,>LE01Gene01789,>LE01Gene00431,>LE01Gene03503,>LE01Gene10685,>LE01Gene03065,>LE01Gene03007,>LE01Gene03881,>LE01Gene11484,>LE01Gene06434,>LE01Gene05596,	0.15853
Biological process	organic acid metabolic process	GO:0006082	4	9.15e-07	1.48985	121	477	970	5697	>LE01Gene06881,>LE01Gene01199,>LE01Gene07739,>LE01Gene03348,>LE01Gene04205,>LE01Gene01520,>LE01Gene01586,>LE01Gene00256,>LE01Gene10058,>LE01Gene10056,>LE01Gene04619,>LE01Gene09080,>LE01Gene00628,>LE01Gene02831,>LE01Gene10460,>LE01Gene01966,>LE01Gene01963,>LE01Gene06329,>LE01Gene08952,>LE01Gene07630,>LE01Gene07632,>LE01Gene01907,>LE01Gene10868,>LE01Gene07681,>LE01Gene04173,>LE01Gene04998,>LE01Gene…	7.72e-05		Molecular function	nuclease activity	GO:0004518	5	0.0368272	1.50026	21	127	767	6959	>LE01Gene00240,>LE01Gene10454,>LE01Gene04172,>LE01Gene05877,>LE01Gene11291,>LE01Gene01463,>LE01Gene01474,>LE01Gene04982,>LE01Gene02727,>LE01Gene10312,>LE01Gene11659,>LE01Gene08868,>LE01Gene05327,>LE01Gene03549,>LE01Gene12494,>LE01Gene06642,>LE01Gene12479,>LE01Gene00899,>LE01Gene10136,>LE01Gene08212,>LE01Gene07785,	0.160291
Biological process	hexose metabolic process	GO:0019318	6	9.61e-07	2.49166	28	66	970	5697	>LE01Gene01999,>LE01Gene00638,>LE01Gene11775,>LE01Gene02390,>LE01Gene11222,>LE01Gene09790,>LE01Gene07114,>LE01Gene04902,>LE01Gene04060,>LE01Gene08877,>LE01Gene14216,>LE01Gene03960,>LE01Gene02678,>LE01Gene08397,>LE01Gene13706,>LE01Gene03056,>LE01Gene06597,>LE01Gene11927,>LE01Gene03017,>LE01Gene03019,>LE01Gene00332,>LE01Gene04720,>LE01Gene00733,>LE01Gene01623,>LE01Gene08279,>LE01Gene11898,>LE01Gene…	7.65e-05		Molecular function	catalytic activity, acting on a protein	GO:0140096	3	0.0368617	1.20126	85	642	767	6959	>LE01Gene05510,>LE01Gene02037,>LE01Gene02019,>LE01Gene14484,>LE01Gene01183,>LE01Gene01184,>LE01Gene09035,>LE01Gene01523,>LE01Gene12662,>LE01Gene10065,>LE01Gene09889,>LE01Gene00667,>LE01Gene02814,>LE01Gene01970,>LE01Gene01092,>LE01Gene09817,>LE01Gene06355,>LE01Gene10849,>LE01Gene08906,>LE01Gene12167,>LE01Gene01061,>LE01Gene02392,>LE01Gene03606,>LE01Gene13882,>LE01Gene01437,>LE01Gene04978,>LE01Gene…	0.159295
Biological process	obsolete coenzyme metabolic process	GO:0006732	0	1.16e-06	2.00223	45	132	970	5697	>LE01Gene13132,>LE01Gene00256,>LE01Gene06393,>LE01Gene08952,>LE01Gene01907,>LE01Gene02390,>LE01Gene01422,>LE01Gene01423,>LE01Gene11222,>LE01Gene09790,>LE01Gene09791,>LE01Gene11602,>LE01Gene07114,>LE01Gene10334,>LE01Gene01873,>LE01Gene04902,>LE01Gene02725,>LE01Gene09703,>LE01Gene05356,>LE01Gene14216,>LE01Gene03112,>LE01Gene03960,>LE01Gene09272,>LE01Gene11106,>LE01Gene02623,>LE01Gene02678,>LE01Gene…	8.75e-05		Molecular function	heme binding	GO:0020037	5	0.037604	1.39956	29	188	767	6959	>LE01Gene06357,>LE01Gene07683,>LE01Gene04110,>LE01Gene12595,>LE01Gene08450,>LE01Gene02706,>LE01Gene00943,>LE01Gene03544,>LE01Gene00080,>LE01Gene01309,>LE01Gene11153,>LE01Gene09670,>LE01Gene03920,>LE01Gene02177,>LE01Gene08720,>LE01Gene08723,>LE01Gene03043,>LE01Gene03091,>LE01Gene04324,>LE01Gene13274,>LE01Gene13279,>LE01Gene09157,>LE01Gene09133,>LE01Gene09132,>LE01Gene03402,>LE01Gene11013,>LE01Gene…	0.16135
Biological process	oxoacid metabolic process	GO:0043436	5	1.28e-06	1.48375	120	475	970	5697	>LE01Gene06881,>LE01Gene01199,>LE01Gene07739,>LE01Gene03348,>LE01Gene04205,>LE01Gene01520,>LE01Gene01586,>LE01Gene00256,>LE01Gene10058,>LE01Gene10056,>LE01Gene04619,>LE01Gene09080,>LE01Gene00628,>LE01Gene02831,>LE01Gene10460,>LE01Gene01966,>LE01Gene01963,>LE01Gene06329,>LE01Gene08952,>LE01Gene07630,>LE01Gene07632,>LE01Gene01907,>LE01Gene10868,>LE01Gene07681,>LE01Gene04173,>LE01Gene04998,>LE01Gene…	9.2e-05		Molecular function	tetrapyrrole binding	GO:0046906	4	0.037604	1.39956	29	188	767	6959	>LE01Gene06357,>LE01Gene07683,>LE01Gene04110,>LE01Gene12595,>LE01Gene08450,>LE01Gene02706,>LE01Gene00943,>LE01Gene03544,>LE01Gene00080,>LE01Gene01309,>LE01Gene11153,>LE01Gene09670,>LE01Gene03920,>LE01Gene02177,>LE01Gene08720,>LE01Gene08723,>LE01Gene03043,>LE01Gene03091,>LE01Gene04324,>LE01Gene13274,>LE01Gene13279,>LE01Gene09157,>LE01Gene09133,>LE01Gene09132,>LE01Gene03402,>LE01Gene11013,>LE01Gene…	0.16135
Biological process	carboxylic acid metabolic process	GO:0019752	6	1.28e-06	1.48375	120	475	970	5697	>LE01Gene06881,>LE01Gene01199,>LE01Gene07739,>LE01Gene03348,>LE01Gene04205,>LE01Gene01520,>LE01Gene01586,>LE01Gene00256,>LE01Gene10058,>LE01Gene10056,>LE01Gene04619,>LE01Gene09080,>LE01Gene00628,>LE01Gene02831,>LE01Gene10460,>LE01Gene01966,>LE01Gene01963,>LE01Gene06329,>LE01Gene08952,>LE01Gene07630,>LE01Gene07632,>LE01Gene01907,>LE01Gene10868,>LE01Gene07681,>LE01Gene04173,>LE01Gene04998,>LE01Gene…	9.2e-05		Molecular function	hydrolase activity, acting on ester bonds	GO:0016788	4	0.0392873	1.31446	41	283	767	6959	>LE01Gene05510,>LE01Gene00690,>LE01Gene00230,>LE01Gene00240,>LE01Gene11755,>LE01Gene10454,>LE01Gene00667,>LE01Gene11776,>LE01Gene04172,>LE01Gene05877,>LE01Gene11291,>LE01Gene03606,>LE01Gene08071,>LE01Gene01463,>LE01Gene01474,>LE01Gene04982,>LE01Gene11252,>LE01Gene01833,>LE01Gene02727,>LE01Gene10312,>LE01Gene09333,>LE01Gene11659,>LE01Gene08868,>LE01Gene05327,>LE01Gene08846,>LE01Gene03549,>LE01Gene…	0.166216
Biological process	nucleobase-containing small molecule biosynthetic process	GO:0034404	7	1.39e-06	2.65956	24	53	970	5697	>LE01Gene05983,>LE01Gene02434,>LE01Gene01078,>LE01Gene02390,>LE01Gene11222,>LE01Gene09790,>LE01Gene07114,>LE01Gene10334,>LE01Gene04902,>LE01Gene12908,>LE01Gene02239,>LE01Gene14216,>LE01Gene07910,>LE01Gene04457,>LE01Gene03960,>LE01Gene11106,>LE01Gene10241,>LE01Gene03056,>LE01Gene06597,>LE01Gene03019,>LE01Gene04720,>LE01Gene00733,>LE01Gene08279,>LE01Gene05567,	9.08e-05		Molecular function	obsolete protein transporter activity	GO:0008565	0	0.0406024	2.52028	5	18	767	6959	>LE01Gene08419,>LE01Gene12896,>LE01Gene10655,>LE01Gene08385,>LE01Gene00359,	0.170586
Biological process	purine-containing compound biosynthetic process	GO:0072522	6	1.98e-06	2.41837	28	68	970	5697	>LE01Gene05983,>LE01Gene06818,>LE01Gene02434,>LE01Gene01586,>LE01Gene10460,>LE01Gene02390,>LE01Gene11222,>LE01Gene09790,>LE01Gene00950,>LE01Gene07114,>LE01Gene10334,>LE01Gene07172,>LE01Gene04902,>LE01Gene09327,>LE01Gene05330,>LE01Gene14216,>LE01Gene07910,>LE01Gene03960,>LE01Gene00453,>LE01Gene03056,>LE01Gene06597,>LE01Gene03019,>LE01Gene06507,>LE01Gene04720,>LE01Gene04726,>LE01Gene00733,>LE01Gene…	0.000124		Molecular function	double-stranded DNA binding	GO:0003690	6	0.0406024	2.52028	5	18	767	6959	>LE01Gene01563,>LE01Gene03287,>LE01Gene08065,>LE01Gene02703,>LE01Gene07301,	0.170586
Biological process	carboxylic acid biosynthetic process	GO:0046394	7	2.87e-06	1.82272	54	174	970	5697	>LE01Gene06881,>LE01Gene01520,>LE01Gene10056,>LE01Gene00628,>LE01Gene01963,>LE01Gene06329,>LE01Gene08952,>LE01Gene01907,>LE01Gene07681,>LE01Gene02397,>LE01Gene02390,>LE01Gene01423,>LE01Gene11222,>LE01Gene13891,>LE01Gene01407,>LE01Gene01477,>LE01Gene09790,>LE01Gene07114,>LE01Gene10765,>LE01Gene10334,>LE01Gene07177,>LE01Gene04902,>LE01Gene09703,>LE01Gene14216,>LE01Gene01364,>LE01Gene12083,>LE01Gene…	0.000172		Molecular function	transferase activity, transferring alkyl or aryl (other than methyl) groups	GO:0016765	4	0.0407683	2.11704	7	30	767	6959	>LE01Gene09436,>LE01Gene05036,>LE01Gene10315,>LE01Gene07511,>LE01Gene04870,>LE01Gene03117,>LE01Gene07419,	0.168937
Biological process	organic acid biosynthetic process	GO:0016053	5	3.49e-06	1.8123	54	175	970	5697	>LE01Gene06881,>LE01Gene01520,>LE01Gene10056,>LE01Gene00628,>LE01Gene01963,>LE01Gene06329,>LE01Gene08952,>LE01Gene01907,>LE01Gene07681,>LE01Gene02397,>LE01Gene02390,>LE01Gene01423,>LE01Gene11222,>LE01Gene13891,>LE01Gene01407,>LE01Gene01477,>LE01Gene09790,>LE01Gene07114,>LE01Gene10765,>LE01Gene10334,>LE01Gene07177,>LE01Gene04902,>LE01Gene09703,>LE01Gene14216,>LE01Gene01364,>LE01Gene12083,>LE01Gene…	0.0002		Molecular function	protein kinase activity	GO:0004672	6	0.0409731	1.32606	38	260	767	6959	>LE01Gene01183,>LE01Gene01184,>LE01Gene09035,>LE01Gene12662,>LE01Gene10065,>LE01Gene02814,>LE01Gene01092,>LE01Gene06355,>LE01Gene10849,>LE01Gene01061,>LE01Gene04978,>LE01Gene11611,>LE01Gene02720,>LE01Gene02722,>LE01Gene08009,>LE01Gene06657,>LE01Gene03156,>LE01Gene05333,>LE01Gene00063,>LE01Gene10236,>LE01Gene03945,>LE01Gene09648,>LE01Gene10631,>LE01Gene03938,>LE01Gene09690,>LE01Gene05225,>LE01Gene…	0.168631
Biological process	purine nucleotide biosynthetic process	GO:0006164	10	3.51e-06	2.40267	27	66	970	5697	>LE01Gene05983,>LE01Gene06818,>LE01Gene02434,>LE01Gene01586,>LE01Gene10460,>LE01Gene02390,>LE01Gene11222,>LE01Gene09790,>LE01Gene00950,>LE01Gene07114,>LE01Gene07172,>LE01Gene04902,>LE01Gene09327,>LE01Gene05330,>LE01Gene14216,>LE01Gene07910,>LE01Gene03960,>LE01Gene00453,>LE01Gene03056,>LE01Gene06597,>LE01Gene03019,>LE01Gene06507,>LE01Gene04720,>LE01Gene04726,>LE01Gene00733,>LE01Gene08279,>LE01Gene…	0.000193		Molecular function	serine-type peptidase activity	GO:0008236	5	0.0442688	1.75093	11	57	767	6959	>LE01Gene03639,>LE01Gene09308,>LE01Gene06272,>LE01Gene10711,>LE01Gene05384,>LE01Gene00433,>LE01Gene00362,>LE01Gene00723,>LE01Gene08253,>LE01Gene14073,>LE01Gene05132,	0.180964
Biological process	organic cyclic compound catabolic process	GO:1901361	5	4.14e-06	2.14719	34	93	970	5697	>LE01Gene05977,>LE01Gene10018,>LE01Gene09080,>LE01Gene09060,>LE01Gene08997,>LE01Gene02390,>LE01Gene11222,>LE01Gene09790,>LE01Gene07114,>LE01Gene04902,>LE01Gene10314,>LE01Gene02230,>LE01Gene14216,>LE01Gene04457,>LE01Gene03960,>LE01Gene02634,>LE01Gene11106,>LE01Gene10241,>LE01Gene03056,>LE01Gene06597,>LE01Gene05620,>LE01Gene03019,>LE01Gene02142,>LE01Gene06992,>LE01Gene03883,>LE01Gene02539,>LE01Gene…	0.00022		Molecular function	serine hydrolase activity	GO:0017171	4	0.0442688	1.75093	11	57	767	6959	>LE01Gene03639,>LE01Gene09308,>LE01Gene06272,>LE01Gene10711,>LE01Gene05384,>LE01Gene00433,>LE01Gene00362,>LE01Gene00723,>LE01Gene08253,>LE01Gene14073,>LE01Gene05132,	0.180964
Biological process	nucleoside phosphate biosynthetic process	GO:1901293	8	5.32e-06	2.15351	33	90	970	5697	>LE01Gene05983,>LE01Gene06818,>LE01Gene13510,>LE01Gene02434,>LE01Gene01586,>LE01Gene10460,>LE01Gene01078,>LE01Gene02390,>LE01Gene01422,>LE01Gene11222,>LE01Gene09790,>LE01Gene00950,>LE01Gene07114,>LE01Gene07172,>LE01Gene04902,>LE01Gene09327,>LE01Gene05356,>LE01Gene05330,>LE01Gene14216,>LE01Gene07910,>LE01Gene03960,>LE01Gene00453,>LE01Gene03056,>LE01Gene06597,>LE01Gene03019,>LE01Gene06507,>LE01Gene…	0.000273		Molecular function	endopeptidase activity	GO:0004175	5	0.0458075	1.49902	19	115	767	6959	>LE01Gene09889,>LE01Gene12167,>LE01Gene02392,>LE01Gene09308,>LE01Gene07593,>LE01Gene06272,>LE01Gene10711,>LE01Gene05384,>LE01Gene00433,>LE01Gene12412,>LE01Gene13323,>LE01Gene05212,>LE01Gene02158,>LE01Gene07853,>LE01Gene00362,>LE01Gene00365,>LE01Gene00730,>LE01Gene00723,>LE01Gene14073,	0.184757
Biological process	nucleotide biosynthetic process	GO:0009165	9	5.32e-06	2.15351	33	90	970	5697	>LE01Gene05983,>LE01Gene06818,>LE01Gene13510,>LE01Gene02434,>LE01Gene01586,>LE01Gene10460,>LE01Gene01078,>LE01Gene02390,>LE01Gene01422,>LE01Gene11222,>LE01Gene09790,>LE01Gene00950,>LE01Gene07114,>LE01Gene07172,>LE01Gene04902,>LE01Gene09327,>LE01Gene05356,>LE01Gene05330,>LE01Gene14216,>LE01Gene07910,>LE01Gene03960,>LE01Gene00453,>LE01Gene03056,>LE01Gene06597,>LE01Gene03019,>LE01Gene06507,>LE01Gene…	0.000273		Molecular function	helicase activity	GO:0004386	4	0.0493772	1.4861	19	116	767	6959	>LE01Gene03366,>LE01Gene10059,>LE01Gene06801,>LE01Gene00240,>LE01Gene08568,>LE01Gene08526,>LE01Gene02350,>LE01Gene08065,>LE01Gene00959,>LE01Gene11651,>LE01Gene03179,>LE01Gene07551,>LE01Gene00925,>LE01Gene08894,>LE01Gene00063,>LE01Gene06642,>LE01Gene02290,>LE01Gene00087,>LE01Gene06943,	0.19525
Biological process	cellular response to chemical stimulus	GO:0070887	4	7.13e-06	1.58201	80	297	970	5697	>LE01Gene05983,>LE01Gene13132,>LE01Gene00290,>LE01Gene06881,>LE01Gene03342,>LE01Gene10024,>LE01Gene01520,>LE01Gene13508,>LE01Gene01586,>LE01Gene02418,>LE01Gene09060,>LE01Gene00628,>LE01Gene01966,>LE01Gene07656,>LE01Gene05481,>LE01Gene07630,>LE01Gene07632,>LE01Gene10868,>LE01Gene08997,>LE01Gene07614,>LE01Gene02390,>LE01Gene11222,>LE01Gene12537,>LE01Gene04974,>LE01Gene01477,>LE01Gene09790,>LE01Gene…	0.000341		Cellular component	mitochondrion	GO:0005739	6	0	3.44403	57	112	421	2849	>LE01Gene03323,>LE01Gene14438,>LE01Gene13119,>LE01Gene09041,>LE01Gene02435,>LE01Gene12240,>LE01Gene09893,>LE01Gene07270,>LE01Gene06315,>LE01Gene07645,>LE01Gene11700,>LE01Gene13008,>LE01Gene01014,>LE01Gene03245,>LE01Gene04586,>LE01Gene01076,>LE01Gene02392,>LE01Gene12551,>LE01Gene13412,>LE01Gene08075,>LE01Gene01885,>LE01Gene08056,>LE01Gene14307,>LE01Gene10312,>LE01Gene10320,>LE01Gene10325,>LE01Gene…	0
Biological process	obsolete cofactor metabolic process	GO:0051186	0	7.66e-06	1.74946	56	188	970	5697	>LE01Gene13132,>LE01Gene00256,>LE01Gene10058,>LE01Gene09060,>LE01Gene06393,>LE01Gene13915,>LE01Gene10455,>LE01Gene10457,>LE01Gene10823,>LE01Gene08952,>LE01Gene01907,>LE01Gene08997,>LE01Gene02390,>LE01Gene01422,>LE01Gene01423,>LE01Gene11222,>LE01Gene09790,>LE01Gene09791,>LE01Gene11602,>LE01Gene07114,>LE01Gene10334,>LE01Gene01873,>LE01Gene04902,>LE01Gene02725,>LE01Gene09703,>LE01Gene05356,>LE01Gene…	0.000354		Cellular component	obsolete mitochondrial part	GO:0044429	0	1.67e-15	3.65796	40	74	421	2849	>LE01Gene03323,>LE01Gene09041,>LE01Gene02435,>LE01Gene09893,>LE01Gene06315,>LE01Gene07645,>LE01Gene11700,>LE01Gene13008,>LE01Gene03245,>LE01Gene04586,>LE01Gene01076,>LE01Gene02392,>LE01Gene12551,>LE01Gene01885,>LE01Gene08056,>LE01Gene14307,>LE01Gene03144,>LE01Gene08419,>LE01Gene00937,>LE01Gene02289,>LE01Gene13399,>LE01Gene00461,>LE01Gene02208,>LE01Gene10655,>LE01Gene03934,>LE01Gene09688,>LE01Gene…	2.85e-13
Biological process	xenobiotic metabolic process	GO:0006805	4	1.04e-05	1.58848	76	281	970	5697	>LE01Gene05983,>LE01Gene13132,>LE01Gene00290,>LE01Gene06881,>LE01Gene03342,>LE01Gene10024,>LE01Gene01520,>LE01Gene01586,>LE01Gene02418,>LE01Gene09060,>LE01Gene00628,>LE01Gene01966,>LE01Gene07656,>LE01Gene05481,>LE01Gene07630,>LE01Gene07632,>LE01Gene10868,>LE01Gene08997,>LE01Gene07614,>LE01Gene02390,>LE01Gene11222,>LE01Gene12537,>LE01Gene01477,>LE01Gene09790,>LE01Gene07108,>LE01Gene07114,>LE01Gene…	0.000466		Cellular component	obsolete cytoplasmic part	GO:0044444	0	1.69e-14	1.72428	146	573	421	2849	>LE01Gene03323,>LE01Gene06839,>LE01Gene14438,>LE01Gene13119,>LE01Gene03363,>LE01Gene04224,>LE01Gene04206,>LE01Gene01553,>LE01Gene09041,>LE01Gene01523,>LE01Gene02435,>LE01Gene01107,>LE01Gene12240,>LE01Gene00242,>LE01Gene09889,>LE01Gene09893,>LE01Gene00662,>LE01Gene01992,>LE01Gene01960,>LE01Gene07270,>LE01Gene12618,>LE01Gene11772,>LE01Gene06315,>LE01Gene09820,>LE01Gene06313,>LE01Gene07645,>LE01Gene…	1.92e-12
Biological process	cellular response to xenobiotic stimulus	GO:0071466	5	1.09e-05	1.58125	77	286	970	5697	>LE01Gene05983,>LE01Gene13132,>LE01Gene00290,>LE01Gene06881,>LE01Gene03342,>LE01Gene10024,>LE01Gene01520,>LE01Gene13508,>LE01Gene01586,>LE01Gene02418,>LE01Gene09060,>LE01Gene00628,>LE01Gene01966,>LE01Gene07656,>LE01Gene05481,>LE01Gene07630,>LE01Gene07632,>LE01Gene10868,>LE01Gene08997,>LE01Gene07614,>LE01Gene02390,>LE01Gene11222,>LE01Gene12537,>LE01Gene01477,>LE01Gene09790,>LE01Gene07108,>LE01Gene…	0.000472		Cellular component	organelle envelope	GO:0031967	4	1.53e-13	3.34078	39	79	421	2849	>LE01Gene09041,>LE01Gene02435,>LE01Gene09893,>LE01Gene06315,>LE01Gene11700,>LE01Gene13008,>LE01Gene03245,>LE01Gene04586,>LE01Gene01076,>LE01Gene12551,>LE01Gene01885,>LE01Gene01892,>LE01Gene08056,>LE01Gene14307,>LE01Gene07132,>LE01Gene03144,>LE01Gene08419,>LE01Gene00937,>LE01Gene02289,>LE01Gene02208,>LE01Gene10655,>LE01Gene01740,>LE01Gene03934,>LE01Gene09688,>LE01Gene08368,>LE01Gene03081,>LE01Gene…	1.31e-11
Biological process	response to xenobiotic stimulus	GO:0009410	4	1.13e-05	1.57426	78	291	970	5697	>LE01Gene05983,>LE01Gene13132,>LE01Gene00290,>LE01Gene06881,>LE01Gene03342,>LE01Gene10024,>LE01Gene01520,>LE01Gene13508,>LE01Gene01586,>LE01Gene02418,>LE01Gene09060,>LE01Gene00628,>LE01Gene01966,>LE01Gene07656,>LE01Gene05481,>LE01Gene07630,>LE01Gene07632,>LE01Gene10868,>LE01Gene08997,>LE01Gene07614,>LE01Gene02390,>LE01Gene11222,>LE01Gene12537,>LE01Gene01477,>LE01Gene09790,>LE01Gene07108,>LE01Gene…	0.000478		Cellular component	obsolete intracellular organelle part	GO:0044446	0	1.94e-13	1.68887	144	577	421	2849	>LE01Gene03323,>LE01Gene05510,>LE01Gene14438,>LE01Gene03366,>LE01Gene05546,>LE01Gene05520,>LE01Gene02019,>LE01Gene04206,>LE01Gene09041,>LE01Gene01532,>LE01Gene02435,>LE01Gene10059,>LE01Gene01107,>LE01Gene10066,>LE01Gene01563,>LE01Gene02417,>LE01Gene00242,>LE01Gene04609,>LE01Gene09889,>LE01Gene09893,>LE01Gene07270,>LE01Gene11772,>LE01Gene06315,>LE01Gene06313,>LE01Gene07645,>LE01Gene07689,>LE01Gene…	1.33e-11
Biological process	purine ribonucleotide biosynthetic process	GO:0009152	11	1.52e-05	2.33063	25	63	970	5697	>LE01Gene05983,>LE01Gene06818,>LE01Gene02434,>LE01Gene01586,>LE01Gene10460,>LE01Gene02390,>LE01Gene11222,>LE01Gene09790,>LE01Gene00950,>LE01Gene07114,>LE01Gene07172,>LE01Gene04902,>LE01Gene14216,>LE01Gene07910,>LE01Gene03960,>LE01Gene00453,>LE01Gene03056,>LE01Gene06597,>LE01Gene03019,>LE01Gene06507,>LE01Gene04720,>LE01Gene04726,>LE01Gene00733,>LE01Gene08279,>LE01Gene05567,	0.000623		Cellular component	obsolete organelle part	GO:0044422	0	2.27e-13	1.68595	144	578	421	2849	>LE01Gene03323,>LE01Gene05510,>LE01Gene14438,>LE01Gene03366,>LE01Gene05546,>LE01Gene05520,>LE01Gene02019,>LE01Gene04206,>LE01Gene09041,>LE01Gene01532,>LE01Gene02435,>LE01Gene10059,>LE01Gene01107,>LE01Gene10066,>LE01Gene01563,>LE01Gene02417,>LE01Gene00242,>LE01Gene04609,>LE01Gene09889,>LE01Gene09893,>LE01Gene07270,>LE01Gene11772,>LE01Gene06315,>LE01Gene06313,>LE01Gene07645,>LE01Gene07689,>LE01Gene…	1.29e-11
Biological process	nucleotide metabolic process	GO:0009117	8	1.57e-05	1.76196	51	170	970	5697	>LE01Gene05983,>LE01Gene13132,>LE01Gene06818,>LE01Gene13510,>LE01Gene02434,>LE01Gene01586,>LE01Gene00256,>LE01Gene06393,>LE01Gene10460,>LE01Gene01078,>LE01Gene02390,>LE01Gene01422,>LE01Gene11222,>LE01Gene09790,>LE01Gene09791,>LE01Gene00950,>LE01Gene07114,>LE01Gene10334,>LE01Gene07172,>LE01Gene04902,>LE01Gene02725,>LE01Gene09327,>LE01Gene12503,>LE01Gene05356,>LE01Gene05330,>LE01Gene14216,>LE01Gene…	0.000626		Cellular component	envelope	GO:0031975	3	2.6e-13	3.29902	39	80	421	2849	>LE01Gene09041,>LE01Gene02435,>LE01Gene09893,>LE01Gene06315,>LE01Gene11700,>LE01Gene13008,>LE01Gene03245,>LE01Gene04586,>LE01Gene01076,>LE01Gene12551,>LE01Gene01885,>LE01Gene01892,>LE01Gene08056,>LE01Gene14307,>LE01Gene07132,>LE01Gene03144,>LE01Gene08419,>LE01Gene00937,>LE01Gene02289,>LE01Gene02208,>LE01Gene10655,>LE01Gene01740,>LE01Gene03934,>LE01Gene09688,>LE01Gene08368,>LE01Gene03081,>LE01Gene…	1.27e-11
Biological process	fructose metabolic process	GO:0006000	7	1.84e-05	3.52392	12	20	970	5697	>LE01Gene11775,>LE01Gene11222,>LE01Gene04902,>LE01Gene04060,>LE01Gene08397,>LE01Gene13706,>LE01Gene06597,>LE01Gene03017,>LE01Gene03019,>LE01Gene00332,>LE01Gene00733,>LE01Gene11898,	0.000712		Cellular component	mitochondrial envelope	GO:0005740	5	9.39e-13	3.67036	32	59	421	2849	>LE01Gene09041,>LE01Gene02435,>LE01Gene09893,>LE01Gene06315,>LE01Gene11700,>LE01Gene13008,>LE01Gene03245,>LE01Gene04586,>LE01Gene01076,>LE01Gene12551,>LE01Gene01885,>LE01Gene08056,>LE01Gene14307,>LE01Gene03144,>LE01Gene08419,>LE01Gene00937,>LE01Gene02289,>LE01Gene02208,>LE01Gene10655,>LE01Gene03934,>LE01Gene09688,>LE01Gene08368,>LE01Gene13274,>LE01Gene04708,>LE01Gene02509,>LE01Gene09140,>LE01Gene…	4.01e-11
Biological process	mannose metabolic process	GO:0006013	7	1.84e-05	3.52392	12	20	970	5697	>LE01Gene11775,>LE01Gene11222,>LE01Gene04902,>LE01Gene04060,>LE01Gene08397,>LE01Gene13706,>LE01Gene06597,>LE01Gene03017,>LE01Gene03019,>LE01Gene00332,>LE01Gene00733,>LE01Gene11898,	0.000712		Cellular component	mitochondrial membrane	GO:0031966	5	4.52e-12	3.77403	29	52	421	2849	>LE01Gene09041,>LE01Gene02435,>LE01Gene09893,>LE01Gene06315,>LE01Gene11700,>LE01Gene13008,>LE01Gene03245,>LE01Gene04586,>LE01Gene12551,>LE01Gene01885,>LE01Gene08056,>LE01Gene14307,>LE01Gene03144,>LE01Gene08419,>LE01Gene00937,>LE01Gene02289,>LE01Gene02208,>LE01Gene03934,>LE01Gene09688,>LE01Gene08368,>LE01Gene04708,>LE01Gene02509,>LE01Gene09140,>LE01Gene01224,>LE01Gene11482,>LE01Gene00747,>LE01Gene…	1.72e-10
Biological process	aromatic compound catabolic process	GO:0019439	5	1.99e-05	2.09275	31	87	970	5697	>LE01Gene05977,>LE01Gene10018,>LE01Gene09080,>LE01Gene09060,>LE01Gene08997,>LE01Gene02390,>LE01Gene11222,>LE01Gene09790,>LE01Gene07114,>LE01Gene04902,>LE01Gene10314,>LE01Gene14216,>LE01Gene04457,>LE01Gene03960,>LE01Gene02634,>LE01Gene11106,>LE01Gene10241,>LE01Gene03056,>LE01Gene06597,>LE01Gene03019,>LE01Gene02142,>LE01Gene03883,>LE01Gene02539,>LE01Gene02540,>LE01Gene03875,>LE01Gene04720,>LE01Gene…	0.000732		Cellular component	mitochondrial inner membrane	GO:0005743	6	1.65e-11	4.3235	23	36	421	2849	>LE01Gene09041,>LE01Gene02435,>LE01Gene09893,>LE01Gene06315,>LE01Gene11700,>LE01Gene13008,>LE01Gene03245,>LE01Gene04586,>LE01Gene12551,>LE01Gene01885,>LE01Gene08056,>LE01Gene14307,>LE01Gene03144,>LE01Gene08419,>LE01Gene02289,>LE01Gene02208,>LE01Gene03934,>LE01Gene04708,>LE01Gene02509,>LE01Gene09140,>LE01Gene01224,>LE01Gene11482,>LE01Gene04234,	5.65e-10
Biological process	glycosyl compound metabolic process	GO:1901657	5	2e-05	3.16249	14	26	970	5697	>LE01Gene05983,>LE01Gene13132,>LE01Gene12254,>LE01Gene13510,>LE01Gene02434,>LE01Gene06379,>LE01Gene01078,>LE01Gene09790,>LE01Gene10334,>LE01Gene14276,>LE01Gene12908,>LE01Gene02239,>LE01Gene07910,>LE01Gene03019,	0.000716		Cellular component	organelle inner membrane	GO:0019866	5	1.75e-10	3.99093	23	39	421	2849	>LE01Gene09041,>LE01Gene02435,>LE01Gene09893,>LE01Gene06315,>LE01Gene11700,>LE01Gene13008,>LE01Gene03245,>LE01Gene04586,>LE01Gene12551,>LE01Gene01885,>LE01Gene08056,>LE01Gene14307,>LE01Gene03144,>LE01Gene08419,>LE01Gene02289,>LE01Gene02208,>LE01Gene03934,>LE01Gene04708,>LE01Gene02509,>LE01Gene09140,>LE01Gene01224,>LE01Gene11482,>LE01Gene04234,	5.43e-09
Biological process	ribonucleotide biosynthetic process	GO:0009260	10	2.25e-05	2.24563	26	68	970	5697	>LE01Gene05983,>LE01Gene06818,>LE01Gene02434,>LE01Gene01586,>LE01Gene10460,>LE01Gene01078,>LE01Gene02390,>LE01Gene11222,>LE01Gene09790,>LE01Gene00950,>LE01Gene07114,>LE01Gene07172,>LE01Gene04902,>LE01Gene14216,>LE01Gene07910,>LE01Gene03960,>LE01Gene00453,>LE01Gene03056,>LE01Gene06597,>LE01Gene03019,>LE01Gene06507,>LE01Gene04720,>LE01Gene04726,>LE01Gene00733,>LE01Gene08279,>LE01Gene05567,	0.000787		Cellular component	organelle membrane	GO:0031090	4	7.75e-10	2.3163	51	149	421	2849	>LE01Gene04206,>LE01Gene09041,>LE01Gene02435,>LE01Gene01107,>LE01Gene09889,>LE01Gene09893,>LE01Gene07270,>LE01Gene11772,>LE01Gene06315,>LE01Gene06313,>LE01Gene11700,>LE01Gene06352,>LE01Gene13008,>LE01Gene03245,>LE01Gene04586,>LE01Gene07617,>LE01Gene12551,>LE01Gene01885,>LE01Gene08056,>LE01Gene14307,>LE01Gene08458,>LE01Gene10330,>LE01Gene07168,>LE01Gene09341,>LE01Gene03144,>LE01Gene08419,>LE01Gene…	2.21e-08
Biological process	ribose phosphate biosynthetic process	GO:0046390	7	2.25e-05	2.24563	26	68	970	5697	>LE01Gene05983,>LE01Gene06818,>LE01Gene02434,>LE01Gene01586,>LE01Gene10460,>LE01Gene01078,>LE01Gene02390,>LE01Gene11222,>LE01Gene09790,>LE01Gene00950,>LE01Gene07114,>LE01Gene07172,>LE01Gene04902,>LE01Gene14216,>LE01Gene07910,>LE01Gene03960,>LE01Gene00453,>LE01Gene03056,>LE01Gene06597,>LE01Gene03019,>LE01Gene06507,>LE01Gene04720,>LE01Gene04726,>LE01Gene00733,>LE01Gene08279,>LE01Gene05567,	0.000787		Cellular component	cytoplasm	GO:0005737	3	1.39e-09	1.46222	164	759	421	2849	>LE01Gene03323,>LE01Gene06839,>LE01Gene14438,>LE01Gene00288,>LE01Gene13119,>LE01Gene03363,>LE01Gene04224,>LE01Gene04206,>LE01Gene10017,>LE01Gene01553,>LE01Gene09041,>LE01Gene01523,>LE01Gene02435,>LE01Gene01107,>LE01Gene12240,>LE01Gene00242,>LE01Gene09889,>LE01Gene09893,>LE01Gene00662,>LE01Gene01992,>LE01Gene01960,>LE01Gene07270,>LE01Gene12618,>LE01Gene11772,>LE01Gene11776,>LE01Gene06315,>LE01Gene…	3.66e-08
Biological process	nucleobase-containing small molecule metabolic process	GO:0055086	6	2.27e-05	1.61513	66	240	970	5697	>LE01Gene05983,>LE01Gene13132,>LE01Gene06818,>LE01Gene12254,>LE01Gene13510,>LE01Gene02434,>LE01Gene01586,>LE01Gene00256,>LE01Gene06379,>LE01Gene06393,>LE01Gene02836,>LE01Gene01999,>LE01Gene10460,>LE01Gene01078,>LE01Gene04567,>LE01Gene08929,>LE01Gene02390,>LE01Gene01422,>LE01Gene11222,>LE01Gene09790,>LE01Gene09791,>LE01Gene00950,>LE01Gene07114,>LE01Gene10334,>LE01Gene07172,>LE01Gene04902,>LE01Gene…	0.000756		Cellular component	proton-transporting ATP synthase complex	GO:0045259	5	6.83e-09	6.20329	11	12	421	2849	>LE01Gene13008,>LE01Gene04586,>LE01Gene01885,>LE01Gene14307,>LE01Gene03585,>LE01Gene06610,>LE01Gene01780,>LE01Gene03934,>LE01Gene03007,>LE01Gene09140,>LE01Gene03869,	1.67e-07
Biological process	nucleoside phosphate metabolic process	GO:0006753	7	2.67e-05	1.7314	51	173	970	5697	>LE01Gene05983,>LE01Gene13132,>LE01Gene06818,>LE01Gene13510,>LE01Gene02434,>LE01Gene01586,>LE01Gene00256,>LE01Gene06393,>LE01Gene10460,>LE01Gene01078,>LE01Gene02390,>LE01Gene01422,>LE01Gene11222,>LE01Gene09790,>LE01Gene09791,>LE01Gene00950,>LE01Gene07114,>LE01Gene10334,>LE01Gene07172,>LE01Gene04902,>LE01Gene02725,>LE01Gene09327,>LE01Gene12503,>LE01Gene05356,>LE01Gene05330,>LE01Gene14216,>LE01Gene…	0.000871		Cellular component	protein-containing complex	GO:0032991	2	2.73e-08	1.37808	179	879	421	2849	>LE01Gene03323,>LE01Gene06839,>LE01Gene05510,>LE01Gene01120,>LE01Gene14438,>LE01Gene03366,>LE01Gene05546,>LE01Gene03363,>LE01Gene04224,>LE01Gene05520,>LE01Gene01541,>LE01Gene01553,>LE01Gene09041,>LE01Gene08161,>LE01Gene01532,>LE01Gene02435,>LE01Gene10059,>LE01Gene01107,>LE01Gene10066,>LE01Gene12240,>LE01Gene01563,>LE01Gene00242,>LE01Gene09889,>LE01Gene00662,>LE01Gene01992,>LE01Gene00630,>LE01Gene…	6.23e-07
Biological process	organophosphate biosynthetic process	GO:0090407	6	2.84e-05	1.79792	45	147	970	5697	>LE01Gene05983,>LE01Gene06818,>LE01Gene07739,>LE01Gene13510,>LE01Gene02434,>LE01Gene01586,>LE01Gene10460,>LE01Gene07630,>LE01Gene07632,>LE01Gene04537,>LE01Gene01078,>LE01Gene02390,>LE01Gene01422,>LE01Gene11222,>LE01Gene09790,>LE01Gene00950,>LE01Gene07114,>LE01Gene07172,>LE01Gene01873,>LE01Gene04902,>LE01Gene09327,>LE01Gene00996,>LE01Gene05356,>LE01Gene05330,>LE01Gene14216,>LE01Gene07910,>LE01Gene…	0.000906		Cellular component	membrane protein complex	GO:0098796	3	4.4e-08	2.31213	41	120	421	2849	>LE01Gene01120,>LE01Gene09041,>LE01Gene02435,>LE01Gene01107,>LE01Gene12240,>LE01Gene09889,>LE01Gene06313,>LE01Gene06352,>LE01Gene13008,>LE01Gene05850,>LE01Gene04586,>LE01Gene01076,>LE01Gene12551,>LE01Gene08075,>LE01Gene01885,>LE01Gene08056,>LE01Gene14307,>LE01Gene08458,>LE01Gene10320,>LE01Gene07168,>LE01Gene03585,>LE01Gene06610,>LE01Gene01780,>LE01Gene00457,>LE01Gene13329,>LE01Gene02208,>LE01Gene…	9.4e-07
Biological process	pyridine-containing compound biosynthetic process	GO:0072525	6	3.27e-05	2.49923	20	47	970	5697	>LE01Gene02390,>LE01Gene01422,>LE01Gene11222,>LE01Gene09790,>LE01Gene07114,>LE01Gene01873,>LE01Gene04902,>LE01Gene05356,>LE01Gene14216,>LE01Gene03960,>LE01Gene03056,>LE01Gene06597,>LE01Gene03019,>LE01Gene02539,>LE01Gene02540,>LE01Gene04720,>LE01Gene00733,>LE01Gene08279,>LE01Gene05567,>LE01Gene05579,	0.00101998		Cellular component	respirasome	GO:0070469	3	3.89e-07	4.39869	13	20	421	2849	>LE01Gene02435,>LE01Gene12240,>LE01Gene05850,>LE01Gene01076,>LE01Gene08075,>LE01Gene10320,>LE01Gene02208,>LE01Gene06179,>LE01Gene13274,>LE01Gene08280,>LE01Gene02509,>LE01Gene11013,>LE01Gene04234,	7.82e-06
Biological process	pyruvate metabolic process	GO:0006090	8	3.27e-05	2.49923	20	47	970	5697	>LE01Gene10056,>LE01Gene02390,>LE01Gene11222,>LE01Gene04966,>LE01Gene09790,>LE01Gene07108,>LE01Gene07114,>LE01Gene04902,>LE01Gene14216,>LE01Gene01364,>LE01Gene03960,>LE01Gene03056,>LE01Gene06597,>LE01Gene03019,>LE01Gene00332,>LE01Gene04720,>LE01Gene00733,>LE01Gene11424,>LE01Gene08279,>LE01Gene05567,	0.00101998		Cellular component	membrane	GO:0016020	3	7.07e-07	1.30668	190	984	421	2849	>LE01Gene00297,>LE01Gene01153,>LE01Gene05511,>LE01Gene01120,>LE01Gene00276,>LE01Gene01123,>LE01Gene05547,>LE01Gene03381,>LE01Gene04206,>LE01Gene14484,>LE01Gene09041,>LE01Gene12689,>LE01Gene01523,>LE01Gene01533,>LE01Gene02435,>LE01Gene00254,>LE01Gene01107,>LE01Gene10064,>LE01Gene12240,>LE01Gene00231,>LE01Gene02429,>LE01Gene13553,>LE01Gene05076,>LE01Gene09436,>LE01Gene09889,>LE01Gene09887,>LE01Gene…	1.34e-05
Biological process	purine nucleoside monophosphate biosynthetic process	GO:0009127	10	3.37e-05	2.32903	23	58	970	5697	>LE01Gene05983,>LE01Gene06818,>LE01Gene01586,>LE01Gene02390,>LE01Gene11222,>LE01Gene09790,>LE01Gene00950,>LE01Gene07114,>LE01Gene07172,>LE01Gene04902,>LE01Gene14216,>LE01Gene07910,>LE01Gene03960,>LE01Gene00453,>LE01Gene03056,>LE01Gene06597,>LE01Gene03019,>LE01Gene06507,>LE01Gene04720,>LE01Gene04726,>LE01Gene00733,>LE01Gene08279,>LE01Gene05567,	0.00100621		Cellular component	non-membrane-bounded organelle	GO:0043228	4	7.13e-07	1.49199	112	508	421	2849	>LE01Gene03323,>LE01Gene14438,>LE01Gene03366,>LE01Gene05546,>LE01Gene03363,>LE01Gene02038,>LE01Gene05520,>LE01Gene02019,>LE01Gene01532,>LE01Gene10059,>LE01Gene10066,>LE01Gene02417,>LE01Gene00242,>LE01Gene04609,>LE01Gene00662,>LE01Gene01960,>LE01Gene07645,>LE01Gene09867,>LE01Gene07689,>LE01Gene08526,>LE01Gene05499,>LE01Gene04172,>LE01Gene01018,>LE01Gene12144,>LE01Gene02350,>LE01Gene08932,>LE01Gene…	1.28e-05
Biological process	purine ribonucleoside monophosphate biosynthetic process	GO:0009168	11	3.37e-05	2.32903	23	58	970	5697	>LE01Gene05983,>LE01Gene06818,>LE01Gene01586,>LE01Gene02390,>LE01Gene11222,>LE01Gene09790,>LE01Gene00950,>LE01Gene07114,>LE01Gene07172,>LE01Gene04902,>LE01Gene14216,>LE01Gene07910,>LE01Gene03960,>LE01Gene00453,>LE01Gene03056,>LE01Gene06597,>LE01Gene03019,>LE01Gene06507,>LE01Gene04720,>LE01Gene04726,>LE01Gene00733,>LE01Gene08279,>LE01Gene05567,	0.00100621		Cellular component	intracellular non-membrane-bounded organelle	GO:0043232	5	7.13e-07	1.49199	112	508	421	2849	>LE01Gene03323,>LE01Gene14438,>LE01Gene03366,>LE01Gene05546,>LE01Gene03363,>LE01Gene02038,>LE01Gene05520,>LE01Gene02019,>LE01Gene01532,>LE01Gene10059,>LE01Gene10066,>LE01Gene02417,>LE01Gene00242,>LE01Gene04609,>LE01Gene00662,>LE01Gene01960,>LE01Gene07645,>LE01Gene09867,>LE01Gene07689,>LE01Gene08526,>LE01Gene05499,>LE01Gene04172,>LE01Gene01018,>LE01Gene12144,>LE01Gene02350,>LE01Gene08932,>LE01Gene…	1.28e-05
Biological process	hydrocarbon metabolic process	GO:0120252	4	3.62e-05	3.35611	12	21	970	5697	>LE01Gene01966,>LE01Gene05481,>LE01Gene09818,>LE01Gene10868,>LE01Gene03960,>LE01Gene02634,>LE01Gene00476,>LE01Gene02142,>LE01Gene12309,>LE01Gene03875,>LE01Gene08279,>LE01Gene04245,	0.00103927		Cellular component	respiratory chain complex	GO:0098803	4	7.47e-07	4.51148	12	18	421	2849	>LE01Gene02435,>LE01Gene12240,>LE01Gene05850,>LE01Gene01076,>LE01Gene08075,>LE01Gene10320,>LE01Gene02208,>LE01Gene06179,>LE01Gene08280,>LE01Gene02509,>LE01Gene11013,>LE01Gene04234,	1.22e-05
Biological process	nicotinamide nucleotide biosynthetic process	GO:0019359	11	4.9e-05	2.57848	18	41	970	5697	>LE01Gene02390,>LE01Gene01422,>LE01Gene11222,>LE01Gene09790,>LE01Gene07114,>LE01Gene04902,>LE01Gene05356,>LE01Gene14216,>LE01Gene03960,>LE01Gene03056,>LE01Gene06597,>LE01Gene03019,>LE01Gene02539,>LE01Gene02540,>LE01Gene04720,>LE01Gene00733,>LE01Gene08279,>LE01Gene05567,	0.00137749		Cellular component	cytochrome complex	GO:0070069	4	8.49e-07	5.20555	10	13	421	2849	>LE01Gene02435,>LE01Gene12240,>LE01Gene05850,>LE01Gene01076,>LE01Gene08075,>LE01Gene10320,>LE01Gene06179,>LE01Gene08280,>LE01Gene02509,>LE01Gene04234,	1.32e-05
Biological process	pyridine nucleotide biosynthetic process	GO:0019363	10	4.9e-05	2.57848	18	41	970	5697	>LE01Gene02390,>LE01Gene01422,>LE01Gene11222,>LE01Gene09790,>LE01Gene07114,>LE01Gene04902,>LE01Gene05356,>LE01Gene14216,>LE01Gene03960,>LE01Gene03056,>LE01Gene06597,>LE01Gene03019,>LE01Gene02539,>LE01Gene02540,>LE01Gene04720,>LE01Gene00733,>LE01Gene08279,>LE01Gene05567,	0.00137749		Cellular component	obsolete membrane part	GO:0044425	0	1.47e-06	1.36611	151	748	421	2849	>LE01Gene00297,>LE01Gene01153,>LE01Gene01120,>LE01Gene00276,>LE01Gene05547,>LE01Gene04206,>LE01Gene14484,>LE01Gene09041,>LE01Gene12689,>LE01Gene01523,>LE01Gene01533,>LE01Gene02435,>LE01Gene00254,>LE01Gene01107,>LE01Gene10064,>LE01Gene12240,>LE01Gene02429,>LE01Gene05076,>LE01Gene09436,>LE01Gene09889,>LE01Gene09887,>LE01Gene09891,>LE01Gene08573,>LE01Gene13912,>LE01Gene10405,>LE01Gene08571,>LE01Gene…	2.19e-05
Biological process	glucose metabolic process	GO:0006006	7	4.9e-05	2.57848	18	41	970	5697	>LE01Gene00638,>LE01Gene02390,>LE01Gene11222,>LE01Gene09790,>LE01Gene07114,>LE01Gene04902,>LE01Gene14216,>LE01Gene03960,>LE01Gene02678,>LE01Gene03056,>LE01Gene06597,>LE01Gene03019,>LE01Gene04720,>LE01Gene00733,>LE01Gene01623,>LE01Gene08279,>LE01Gene05567,>LE01Gene04299,	0.00137749		Cellular component	proton-transporting two-sector ATPase complex	GO:0016469	4	1.81e-06	3.78964	14	25	421	2849	>LE01Gene01120,>LE01Gene06352,>LE01Gene13008,>LE01Gene04586,>LE01Gene01885,>LE01Gene14307,>LE01Gene03585,>LE01Gene06610,>LE01Gene01780,>LE01Gene10225,>LE01Gene03934,>LE01Gene03007,>LE01Gene09140,>LE01Gene03869,	2.57e-05
Biological process	organic hydroxy compound metabolic process	GO:1901615	4	5.86e-05	2.47979	19	45	970	5697	>LE01Gene03342,>LE01Gene05481,>LE01Gene10868,>LE01Gene11222,>LE01Gene09790,>LE01Gene01873,>LE01Gene04902,>LE01Gene03960,>LE01Gene06597,>LE01Gene06122,>LE01Gene05620,>LE01Gene03019,>LE01Gene02135,>LE01Gene02142,>LE01Gene08279,>LE01Gene11898,>LE01Gene05579,>LE01Gene04299,>LE01Gene05151,	0.00155597		Cellular component	oxidoreductase complex	GO:1990204	4	3.39e-06	3.64389	14	26	421	2849	>LE01Gene06839,>LE01Gene04224,>LE01Gene01553,>LE01Gene02435,>LE01Gene05850,>LE01Gene08075,>LE01Gene02208,>LE01Gene10284,>LE01Gene06114,>LE01Gene03424,>LE01Gene01259,>LE01Gene03468,>LE01Gene02509,>LE01Gene11013,	4.64e-05
Biological process	ribonucleoside monophosphate biosynthetic process	GO:0009156	10	6.69e-05	2.20245	24	64	970	5697	>LE01Gene05983,>LE01Gene06818,>LE01Gene01586,>LE01Gene01078,>LE01Gene02390,>LE01Gene11222,>LE01Gene09790,>LE01Gene00950,>LE01Gene07114,>LE01Gene07172,>LE01Gene04902,>LE01Gene14216,>LE01Gene07910,>LE01Gene03960,>LE01Gene00453,>LE01Gene03056,>LE01Gene06597,>LE01Gene03019,>LE01Gene06507,>LE01Gene04720,>LE01Gene04726,>LE01Gene00733,>LE01Gene08279,>LE01Gene05567,	0.00174326		Cellular component	MCM complex	GO:0042555	3	1.01e-05	6.76722	6	6	421	2849	>LE01Gene03366,>LE01Gene10059,>LE01Gene08526,>LE01Gene08065,>LE01Gene11651,>LE01Gene02290,	0.000133
Biological process	nucleoside metabolic process	GO:0009116	7	6.74e-05	3.20356	12	22	970	5697	>LE01Gene05983,>LE01Gene13132,>LE01Gene12254,>LE01Gene13510,>LE01Gene02434,>LE01Gene06379,>LE01Gene01078,>LE01Gene10334,>LE01Gene14276,>LE01Gene12908,>LE01Gene02239,>LE01Gene07910,	0.00172686		Cellular component	mitochondrial protein-containing complex	GO:0098798	3	2.22e-05	3.38361	13	26	421	2849	>LE01Gene03323,>LE01Gene09041,>LE01Gene02435,>LE01Gene13008,>LE01Gene04586,>LE01Gene12551,>LE01Gene08056,>LE01Gene14307,>LE01Gene00461,>LE01Gene10655,>LE01Gene03934,>LE01Gene02509,>LE01Gene09140,	0.000281
Biological process	amine metabolic process	GO:0009308	5	8.08e-05	2.26685	22	57	970	5697	>LE01Gene06881,>LE01Gene07739,>LE01Gene06854,>LE01Gene01520,>LE01Gene09080,>LE01Gene01477,>LE01Gene10765,>LE01Gene07177,>LE01Gene08833,>LE01Gene03960,>LE01Gene07012,>LE01Gene12832,>LE01Gene06195,>LE01Gene06514,>LE01Gene04738,>LE01Gene02539,>LE01Gene02540,>LE01Gene04720,>LE01Gene06090,>LE01Gene06091,>LE01Gene08279,>LE01Gene04245,	0.00203368		Cellular component	proton-transporting two-sector ATPase complex, proton-transporting domain	GO:0033177	4	2.34e-05	4.92162	8	11	421	2849	>LE01Gene01120,>LE01Gene06352,>LE01Gene04586,>LE01Gene14307,>LE01Gene10225,>LE01Gene03934,>LE01Gene09140,>LE01Gene03869,	0.000286
Biological process	nucleoside monophosphate biosynthetic process	GO:0009124	9	8.92e-05	2.16856	24	65	970	5697	>LE01Gene05983,>LE01Gene06818,>LE01Gene01586,>LE01Gene01078,>LE01Gene02390,>LE01Gene11222,>LE01Gene09790,>LE01Gene00950,>LE01Gene07114,>LE01Gene07172,>LE01Gene04902,>LE01Gene14216,>LE01Gene07910,>LE01Gene03960,>LE01Gene00453,>LE01Gene03056,>LE01Gene06597,>LE01Gene03019,>LE01Gene06507,>LE01Gene04720,>LE01Gene04726,>LE01Gene00733,>LE01Gene08279,>LE01Gene05567,	0.00220539		Cellular component	inner mitochondrial membrane protein complex	GO:0098800	4	3.29e-05	3.98072	10	17	421	2849	>LE01Gene09041,>LE01Gene02435,>LE01Gene13008,>LE01Gene04586,>LE01Gene12551,>LE01Gene08056,>LE01Gene14307,>LE01Gene03934,>LE01Gene02509,>LE01Gene09140,	0.000388
Biological process	heterocycle catabolic process	GO:0046700	5	9.13e-05	2.0038	29	85	970	5697	>LE01Gene05977,>LE01Gene10018,>LE01Gene09080,>LE01Gene02390,>LE01Gene11222,>LE01Gene09790,>LE01Gene07114,>LE01Gene04902,>LE01Gene10314,>LE01Gene02230,>LE01Gene14216,>LE01Gene04457,>LE01Gene03960,>LE01Gene11106,>LE01Gene10241,>LE01Gene03056,>LE01Gene06597,>LE01Gene03019,>LE01Gene02142,>LE01Gene06992,>LE01Gene02539,>LE01Gene02540,>LE01Gene03875,>LE01Gene04720,>LE01Gene00733,>LE01Gene06090,>LE01Gene…	0.00221785		Cellular component	obsolete mitochondrial membrane part	GO:0044455	0	4.65e-05	3.38361	12	24	421	2849	>LE01Gene09041,>LE01Gene02435,>LE01Gene11700,>LE01Gene13008,>LE01Gene04586,>LE01Gene12551,>LE01Gene08056,>LE01Gene14307,>LE01Gene03934,>LE01Gene08368,>LE01Gene02509,>LE01Gene09140,	0.00053
Biological process	cellular alkane metabolic process	GO:0043446	5	0.000106	4.56804	7	9	970	5697	>LE01Gene01966,>LE01Gene05481,>LE01Gene09818,>LE01Gene10868,>LE01Gene00476,>LE01Gene12309,>LE01Gene04245,	0.00254532		Cellular component	proton-transporting ATP synthase complex, coupling factor F(o)	GO:0045263	5	6.9e-05	6.76722	5	5	421	2849	>LE01Gene04586,>LE01Gene14307,>LE01Gene03934,>LE01Gene09140,>LE01Gene03869,	0.000762
Biological process	methane metabolic process	GO:0015947	6	0.000106	4.56804	7	9	970	5697	>LE01Gene01966,>LE01Gene05481,>LE01Gene09818,>LE01Gene10868,>LE01Gene00476,>LE01Gene12309,>LE01Gene04245,	0.00254532		Cellular component	protein-DNA complex	GO:0032993	3	0.000125	3.12333	12	26	421	2849	>LE01Gene05520,>LE01Gene01532,>LE01Gene12144,>LE01Gene08055,>LE01Gene13783,>LE01Gene13301,>LE01Gene13300,>LE01Gene13784,>LE01Gene05299,>LE01Gene03840,>LE01Gene03839,>LE01Gene00778,	0.00133653
Biological process	dicarboxylic acid metabolic process	GO:0043648	7	0.00011	2.22776	22	58	970	5697	>LE01Gene01586,>LE01Gene10460,>LE01Gene06329,>LE01Gene04519,>LE01Gene03256,>LE01Gene12537,>LE01Gene07108,>LE01Gene07177,>LE01Gene09703,>LE01Gene07910,>LE01Gene12831,>LE01Gene05292,>LE01Gene12401,>LE01Gene06195,>LE01Gene11906,>LE01Gene06507,>LE01Gene06992,>LE01Gene02988,>LE01Gene02539,>LE01Gene02540,>LE01Gene11424,>LE01Gene06090,	0.00253619		Cellular component	nucleosome	GO:0000786	4	0.000125	3.12333	12	26	421	2849	>LE01Gene05520,>LE01Gene01532,>LE01Gene12144,>LE01Gene08055,>LE01Gene13783,>LE01Gene13301,>LE01Gene13300,>LE01Gene13784,>LE01Gene05299,>LE01Gene03840,>LE01Gene03839,>LE01Gene00778,	0.00133653
Biological process	response to chemical	GO:0042221	3	0.000117	1.45951	83	334	970	5697	>LE01Gene05983,>LE01Gene13132,>LE01Gene00290,>LE01Gene06881,>LE01Gene03342,>LE01Gene10024,>LE01Gene01520,>LE01Gene13508,>LE01Gene01586,>LE01Gene02418,>LE01Gene09060,>LE01Gene00628,>LE01Gene01966,>LE01Gene07656,>LE01Gene05481,>LE01Gene07630,>LE01Gene07632,>LE01Gene10868,>LE01Gene08997,>LE01Gene07614,>LE01Gene02390,>LE01Gene11222,>LE01Gene12537,>LE01Gene04974,>LE01Gene01477,>LE01Gene09790,>LE01Gene…	0.00265389		Cellular component	chromosome	GO:0005694	6	0.0003	1.6719	42	170	421	2849	>LE01Gene03366,>LE01Gene02038,>LE01Gene05520,>LE01Gene01532,>LE01Gene10059,>LE01Gene10066,>LE01Gene02417,>LE01Gene04609,>LE01Gene07645,>LE01Gene08526,>LE01Gene04172,>LE01Gene12144,>LE01Gene02350,>LE01Gene08065,>LE01Gene08055,>LE01Gene01474,>LE01Gene09319,>LE01Gene00959,>LE01Gene06270,>LE01Gene01845,>LE01Gene11651,>LE01Gene12981,>LE01Gene09747,>LE01Gene07551,>LE01Gene00925,>LE01Gene06642,>LE01Gene…	0.00302184
Biological process	cellular nitrogen compound catabolic process	GO:0044270	5	0.000118	2.00548	28	82	970	5697	>LE01Gene05977,>LE01Gene10018,>LE01Gene09080,>LE01Gene02390,>LE01Gene11222,>LE01Gene09790,>LE01Gene07114,>LE01Gene04902,>LE01Gene10314,>LE01Gene02230,>LE01Gene14216,>LE01Gene04457,>LE01Gene03960,>LE01Gene11106,>LE01Gene10241,>LE01Gene03056,>LE01Gene06597,>LE01Gene03019,>LE01Gene02142,>LE01Gene02539,>LE01Gene02540,>LE01Gene03875,>LE01Gene04720,>LE01Gene00733,>LE01Gene06090,>LE01Gene06091,>LE01Gene…	0.00264725		Cellular component	mitochondrial proton-transporting ATP synthase complex	GO:0005753	6	0.000364	5.63935	5	6	421	2849	>LE01Gene13008,>LE01Gene04586,>LE01Gene14307,>LE01Gene03934,>LE01Gene09140,	0.00355449
Biological process	aromatic amino acid family metabolic process	GO:0009072	8	0.00012	2.03303	27	78	970	5697	>LE01Gene06881,>LE01Gene01520,>LE01Gene09080,>LE01Gene01477,>LE01Gene10765,>LE01Gene07177,>LE01Gene11650,>LE01Gene08833,>LE01Gene03960,>LE01Gene02634,>LE01Gene07012,>LE01Gene12832,>LE01Gene06195,>LE01Gene05603,>LE01Gene01640,>LE01Gene03883,>LE01Gene02539,>LE01Gene02540,>LE01Gene03875,>LE01Gene04720,>LE01Gene04726,>LE01Gene01639,>LE01Gene06090,>LE01Gene06091,>LE01Gene08279,>LE01Gene04245,>LE01Gene…	0.00264142		Cellular component	proton-transporting ATP synthase complex, catalytic core F(1)	GO:0045261	5	0.000364	5.63935	5	6	421	2849	>LE01Gene13008,>LE01Gene01885,>LE01Gene03585,>LE01Gene06610,>LE01Gene03007,	0.00355449
Biological process	carbohydrate derivative metabolic process	GO:1901135	4	0.000124	1.52434	68	262	970	5697	>LE01Gene05983,>LE01Gene13132,>LE01Gene06818,>LE01Gene12254,>LE01Gene13510,>LE01Gene02434,>LE01Gene01586,>LE01Gene00256,>LE01Gene02420,>LE01Gene06379,>LE01Gene06393,>LE01Gene01999,>LE01Gene10460,>LE01Gene00638,>LE01Gene07656,>LE01Gene04192,>LE01Gene01078,>LE01Gene06745,>LE01Gene02390,>LE01Gene11222,>LE01Gene09790,>LE01Gene10788,>LE01Gene00950,>LE01Gene07114,>LE01Gene07124,>LE01Gene10334,>LE01Gene…	0.00269241		Cellular component	respiratory chain complex IV	GO:0045277	5	0.000569	4.51148	6	9	421	2849	>LE01Gene12240,>LE01Gene01076,>LE01Gene10320,>LE01Gene06179,>LE01Gene08280,>LE01Gene04234,	0.00486273
Biological process	nucleoside diphosphate phosphorylation	GO:0006165	9	0.000129	2.66963	15	33	970	5697	>LE01Gene02434,>LE01Gene02390,>LE01Gene11222,>LE01Gene09790,>LE01Gene07114,>LE01Gene04902,>LE01Gene14216,>LE01Gene03960,>LE01Gene03056,>LE01Gene06597,>LE01Gene03019,>LE01Gene04720,>LE01Gene00733,>LE01Gene08279,>LE01Gene05567,	0.00276522		Cellular component	mitochondrial matrix	GO:0005759	6	0.00092	3.38361	8	16	421	2849	>LE01Gene03323,>LE01Gene07645,>LE01Gene02392,>LE01Gene13399,>LE01Gene00461,>LE01Gene00801,>LE01Gene03424,>LE01Gene00365,	0.00767327
Biological process	nucleoside phosphate catabolic process	GO:1901292	8	0.00013	2.49611	17	40	970	5697	>LE01Gene02390,>LE01Gene11222,>LE01Gene09790,>LE01Gene07114,>LE01Gene04902,>LE01Gene14216,>LE01Gene04457,>LE01Gene03960,>LE01Gene11106,>LE01Gene10241,>LE01Gene03056,>LE01Gene06597,>LE01Gene03019,>LE01Gene04720,>LE01Gene00733,>LE01Gene08279,>LE01Gene05567,	0.0027385		Cellular component	obsolete chromosomal part	GO:0044427	0	0.00102624	1.62756	38	158	421	2849	>LE01Gene03366,>LE01Gene05520,>LE01Gene01532,>LE01Gene10059,>LE01Gene10066,>LE01Gene02417,>LE01Gene04609,>LE01Gene08526,>LE01Gene04172,>LE01Gene12144,>LE01Gene02350,>LE01Gene08065,>LE01Gene08055,>LE01Gene01474,>LE01Gene09319,>LE01Gene00959,>LE01Gene06270,>LE01Gene11651,>LE01Gene12981,>LE01Gene09747,>LE01Gene07551,>LE01Gene00925,>LE01Gene06642,>LE01Gene02290,>LE01Gene13783,>LE01Gene13301,>LE01Gene…	0.00835651
Biological process	tryptophan metabolic process	GO:0006568	9	0.00021	2.34928	18	45	970	5697	>LE01Gene06881,>LE01Gene01520,>LE01Gene09080,>LE01Gene01477,>LE01Gene10765,>LE01Gene07177,>LE01Gene08833,>LE01Gene03960,>LE01Gene07012,>LE01Gene12832,>LE01Gene06195,>LE01Gene02539,>LE01Gene02540,>LE01Gene04720,>LE01Gene06090,>LE01Gene06091,>LE01Gene08279,>LE01Gene04245,	0.00436728		Cellular component	polymeric cytoskeletal fiber	GO:0099513	6	0.00125545	2.53771	12	32	421	2849	>LE01Gene05546,>LE01Gene05437,>LE01Gene01434,>LE01Gene01435,>LE01Gene11633,>LE01Gene12981,>LE01Gene00049,>LE01Gene03108,>LE01Gene00089,>LE01Gene11519,>LE01Gene00757,>LE01Gene08622,	0.00998518
Biological process	indolalkylamine metabolic process	GO:0006586	8	0.00021	2.34928	18	45	970	5697	>LE01Gene06881,>LE01Gene01520,>LE01Gene09080,>LE01Gene01477,>LE01Gene10765,>LE01Gene07177,>LE01Gene08833,>LE01Gene03960,>LE01Gene07012,>LE01Gene12832,>LE01Gene06195,>LE01Gene02539,>LE01Gene02540,>LE01Gene04720,>LE01Gene06090,>LE01Gene06091,>LE01Gene08279,>LE01Gene04245,	0.00436728		Cellular component	supramolecular fiber	GO:0099512	5	0.00125545	2.53771	12	32	421	2849	>LE01Gene05546,>LE01Gene05437,>LE01Gene01434,>LE01Gene01435,>LE01Gene11633,>LE01Gene12981,>LE01Gene00049,>LE01Gene03108,>LE01Gene00089,>LE01Gene11519,>LE01Gene00757,>LE01Gene08622,	0.00998518
Biological process	indole-containing compound metabolic process	GO:0042430	5	0.00021	2.34928	18	45	970	5697	>LE01Gene06881,>LE01Gene01520,>LE01Gene09080,>LE01Gene01477,>LE01Gene10765,>LE01Gene07177,>LE01Gene08833,>LE01Gene03960,>LE01Gene07012,>LE01Gene12832,>LE01Gene06195,>LE01Gene02539,>LE01Gene02540,>LE01Gene04720,>LE01Gene06090,>LE01Gene06091,>LE01Gene08279,>LE01Gene04245,	0.00436728		Cellular component	microtubule	GO:0005874	7	0.00125545	2.53771	12	32	421	2849	>LE01Gene05546,>LE01Gene05437,>LE01Gene01434,>LE01Gene01435,>LE01Gene11633,>LE01Gene12981,>LE01Gene00049,>LE01Gene03108,>LE01Gene00089,>LE01Gene11519,>LE01Gene00757,>LE01Gene08622,	0.00998518
Biological process	ATP generation from ADP	GO:0006757	12	0.000236	2.65241	14	31	970	5697	>LE01Gene02390,>LE01Gene11222,>LE01Gene09790,>LE01Gene07114,>LE01Gene04902,>LE01Gene14216,>LE01Gene03960,>LE01Gene03056,>LE01Gene06597,>LE01Gene03019,>LE01Gene04720,>LE01Gene00733,>LE01Gene08279,>LE01Gene05567,	0.00469835		Cellular component	supramolecular polymer	GO:0099081	4	0.00125545	2.53771	12	32	421	2849	>LE01Gene05546,>LE01Gene05437,>LE01Gene01434,>LE01Gene01435,>LE01Gene11633,>LE01Gene12981,>LE01Gene00049,>LE01Gene03108,>LE01Gene00089,>LE01Gene11519,>LE01Gene00757,>LE01Gene08622,	0.00998518
Biological process	pyruvate biosynthetic process	GO:0042866	9	0.000236	2.65241	14	31	970	5697	>LE01Gene02390,>LE01Gene11222,>LE01Gene09790,>LE01Gene07114,>LE01Gene04902,>LE01Gene14216,>LE01Gene03960,>LE01Gene03056,>LE01Gene06597,>LE01Gene03019,>LE01Gene04720,>LE01Gene00733,>LE01Gene08279,>LE01Gene05567,	0.00469835		Cellular component	microtubule associated complex	GO:0005875	3	0.00181362	2.70689	10	25	421	2849	>LE01Gene05546,>LE01Gene05437,>LE01Gene11633,>LE01Gene12981,>LE01Gene00049,>LE01Gene03108,>LE01Gene00089,>LE01Gene10693,>LE01Gene09610,>LE01Gene00757,	0.013197
Biological process	glycolytic process	GO:0006096	13	0.000236	2.65241	14	31	970	5697	>LE01Gene02390,>LE01Gene11222,>LE01Gene09790,>LE01Gene07114,>LE01Gene04902,>LE01Gene14216,>LE01Gene03960,>LE01Gene03056,>LE01Gene06597,>LE01Gene03019,>LE01Gene04720,>LE01Gene00733,>LE01Gene08279,>LE01Gene05567,	0.00469835		Cellular component	large ribosomal subunit	GO:0015934	5	0.00240096	3.69121	6	11	421	2849	>LE01Gene00242,>LE01Gene08921,>LE01Gene00147,>LE01Gene00960,>LE01Gene03027,>LE01Gene01648,	0.0164226
Biological process	organophosphate metabolic process	GO:0019637	5	0.00025	1.49621	67	263	970	5697	>LE01Gene05983,>LE01Gene13132,>LE01Gene06818,>LE01Gene07739,>LE01Gene13510,>LE01Gene02434,>LE01Gene01586,>LE01Gene00256,>LE01Gene06393,>LE01Gene10460,>LE01Gene00638,>LE01Gene07630,>LE01Gene07632,>LE01Gene04537,>LE01Gene01078,>LE01Gene02390,>LE01Gene01422,>LE01Gene11222,>LE01Gene09790,>LE01Gene09791,>LE01Gene00950,>LE01Gene07114,>LE01Gene10334,>LE01Gene07172,>LE01Gene01873,>LE01Gene04902,>LE01Gene…	0.00478674		Cellular component	ribosome	GO:0005840	6	0.00266558	1.4725	47	216	421	2849	>LE01Gene03323,>LE01Gene14438,>LE01Gene03363,>LE01Gene00242,>LE01Gene00662,>LE01Gene01960,>LE01Gene09867,>LE01Gene05499,>LE01Gene05411,>LE01Gene08921,>LE01Gene13881,>LE01Gene11238,>LE01Gene01898,>LE01Gene00147,>LE01Gene07135,>LE01Gene10309,>LE01Gene00960,>LE01Gene02727,>LE01Gene02296,>LE01Gene05327,>LE01Gene00911,>LE01Gene08401,>LE01Gene00054,>LE01Gene03586,>LE01Gene03109,>LE01Gene00087,>LE01Gene…	0.0178751
Biological process	aromatic amino acid family catabolic process	GO:0009074	9	0.000303	4.11124	7	10	970	5697	>LE01Gene09080,>LE01Gene02634,>LE01Gene03883,>LE01Gene02539,>LE01Gene02540,>LE01Gene06090,>LE01Gene06091,	0.00571154		Cellular component	fungal-type cell wall	GO:0009277	5	0.00321491	3.15804	7	15	421	2849	>LE01Gene13539,>LE01Gene13506,>LE01Gene13552,>LE01Gene13554,>LE01Gene10826,>LE01Gene08487,>LE01Gene03013,	0.0211442
Biological process	cellular biogenic amine metabolic process	GO:0006576	7	0.000311	2.23181	19	50	970	5697	>LE01Gene06881,>LE01Gene01520,>LE01Gene09080,>LE01Gene01477,>LE01Gene10765,>LE01Gene07177,>LE01Gene08833,>LE01Gene03960,>LE01Gene07012,>LE01Gene12832,>LE01Gene06195,>LE01Gene06514,>LE01Gene02539,>LE01Gene02540,>LE01Gene04720,>LE01Gene06090,>LE01Gene06091,>LE01Gene08279,>LE01Gene04245,	0.00578812		Cellular component	kinesin complex	GO:0005871	4	0.00420965	3.38361	6	12	421	2849	>LE01Gene05546,>LE01Gene05437,>LE01Gene12981,>LE01Gene03108,>LE01Gene00089,>LE01Gene00757,	0.0271642
Biological process	nucleotide catabolic process	GO:0009166	9	0.000334	2.40952	16	39	970	5697	>LE01Gene02390,>LE01Gene11222,>LE01Gene09790,>LE01Gene07114,>LE01Gene04902,>LE01Gene14216,>LE01Gene04457,>LE01Gene03960,>LE01Gene11106,>LE01Gene03056,>LE01Gene06597,>LE01Gene03019,>LE01Gene04720,>LE01Gene00733,>LE01Gene08279,>LE01Gene05567,	0.00613423		Cellular component	DNA packaging complex	GO:0044815	3	0.00450044	2.1457	13	41	421	2849	>LE01Gene05520,>LE01Gene01532,>LE01Gene12144,>LE01Gene08055,>LE01Gene13783,>LE01Gene13301,>LE01Gene13300,>LE01Gene13784,>LE01Gene05299,>LE01Gene03840,>LE01Gene03839,>LE01Gene00778,>LE01Gene05105,	0.0285028
Biological process	carbon utilization	GO:0015976	6	0.00041	3.09116	10	19	970	5697	>LE01Gene02390,>LE01Gene11222,>LE01Gene01407,>LE01Gene04902,>LE01Gene02623,>LE01Gene03058,>LE01Gene03056,>LE01Gene06597,>LE01Gene00733,>LE01Gene11424,	0.00744539		Cellular component	intrinsic component of membrane	GO:0031224	3	0.00577512	1.21463	119	663	421	2849	>LE01Gene00297,>LE01Gene01153,>LE01Gene00276,>LE01Gene05547,>LE01Gene04206,>LE01Gene14484,>LE01Gene12689,>LE01Gene01523,>LE01Gene01533,>LE01Gene02435,>LE01Gene00254,>LE01Gene10064,>LE01Gene02429,>LE01Gene05076,>LE01Gene09436,>LE01Gene09887,>LE01Gene09891,>LE01Gene08573,>LE01Gene13912,>LE01Gene10405,>LE01Gene08571,>LE01Gene08155,>LE01Gene07276,>LE01Gene12618,>LE01Gene11772,>LE01Gene05475,>LE01Gene…	0.0359108
Biological process	cellular amine metabolic process	GO:0044106	6	0.000418	2.18805	19	51	970	5697	>LE01Gene06881,>LE01Gene01520,>LE01Gene09080,>LE01Gene01477,>LE01Gene10765,>LE01Gene07177,>LE01Gene08833,>LE01Gene03960,>LE01Gene07012,>LE01Gene12832,>LE01Gene06195,>LE01Gene06514,>LE01Gene02539,>LE01Gene02540,>LE01Gene04720,>LE01Gene06090,>LE01Gene06091,>LE01Gene08279,>LE01Gene04245,	0.00748632		Cellular component	tubulin complex	GO:0045298	3	0.00743858	2.7865	7	17	421	2849	>LE01Gene05546,>LE01Gene05437,>LE01Gene12981,>LE01Gene03108,>LE01Gene00089,>LE01Gene09135,>LE01Gene00757,	0.0454285
Biological process	obsolete coenzyme biosynthetic process	GO:0009108	0	0.000495	1.81645	30	97	970	5697	>LE01Gene08952,>LE01Gene01907,>LE01Gene02390,>LE01Gene01422,>LE01Gene01423,>LE01Gene11222,>LE01Gene09790,>LE01Gene11602,>LE01Gene07114,>LE01Gene01873,>LE01Gene04902,>LE01Gene09703,>LE01Gene05356,>LE01Gene14216,>LE01Gene03112,>LE01Gene03960,>LE01Gene09272,>LE01Gene03056,>LE01Gene02192,>LE01Gene06597,>LE01Gene03019,>LE01Gene02975,>LE01Gene02988,>LE01Gene02539,>LE01Gene02540,>LE01Gene04720,>LE01Gene…	0.00876192		Cellular component	integral component of membrane	GO:0016021	4	0.0076771	1.20624	118	662	421	2849	>LE01Gene00297,>LE01Gene01153,>LE01Gene00276,>LE01Gene05547,>LE01Gene04206,>LE01Gene14484,>LE01Gene12689,>LE01Gene01523,>LE01Gene01533,>LE01Gene02435,>LE01Gene00254,>LE01Gene10064,>LE01Gene02429,>LE01Gene05076,>LE01Gene09436,>LE01Gene09887,>LE01Gene09891,>LE01Gene13912,>LE01Gene10405,>LE01Gene08571,>LE01Gene08155,>LE01Gene07276,>LE01Gene12618,>LE01Gene11772,>LE01Gene05475,>LE01Gene03264,>LE01Gene…	0.0460626
Biological process	ribose phosphate metabolic process	GO:0019693	6	0.000511	1.69772	37	128	970	5697	>LE01Gene05983,>LE01Gene06818,>LE01Gene02434,>LE01Gene01586,>LE01Gene00256,>LE01Gene06393,>LE01Gene10460,>LE01Gene01078,>LE01Gene02390,>LE01Gene11222,>LE01Gene09790,>LE01Gene00950,>LE01Gene07114,>LE01Gene07172,>LE01Gene04902,>LE01Gene02725,>LE01Gene14216,>LE01Gene07910,>LE01Gene03960,>LE01Gene00453,>LE01Gene11106,>LE01Gene02623,>LE01Gene02678,>LE01Gene10632,>LE01Gene03058,>LE01Gene03056,>LE01Gene…	0.00894255		Cellular component	endoplasmic reticulum subcompartment	GO:0098827	4	0.0087092	1.99941	13	44	421	2849	>LE01Gene04206,>LE01Gene01107,>LE01Gene11772,>LE01Gene06313,>LE01Gene07617,>LE01Gene10330,>LE01Gene07168,>LE01Gene09341,>LE01Gene00093,>LE01Gene00457,>LE01Gene08385,>LE01Gene04328,>LE01Gene01648,	0.0513542
Biological process	purine nucleoside diphosphate metabolic process	GO:0009135	9	0.00052	2.49166	14	33	970	5697	>LE01Gene02390,>LE01Gene11222,>LE01Gene09790,>LE01Gene07114,>LE01Gene04902,>LE01Gene14216,>LE01Gene03960,>LE01Gene03056,>LE01Gene06597,>LE01Gene03019,>LE01Gene04720,>LE01Gene00733,>LE01Gene08279,>LE01Gene05567,	0.00899178		Cellular component	endoplasmic reticulum membrane	GO:0005789	5	0.0087092	1.99941	13	44	421	2849	>LE01Gene04206,>LE01Gene01107,>LE01Gene11772,>LE01Gene06313,>LE01Gene07617,>LE01Gene10330,>LE01Gene07168,>LE01Gene09341,>LE01Gene00093,>LE01Gene00457,>LE01Gene08385,>LE01Gene04328,>LE01Gene01648,	0.0513542
Biological process	ADP metabolic process	GO:0046031	11	0.00052	2.49166	14	33	970	5697	>LE01Gene02390,>LE01Gene11222,>LE01Gene09790,>LE01Gene07114,>LE01Gene04902,>LE01Gene14216,>LE01Gene03960,>LE01Gene03056,>LE01Gene06597,>LE01Gene03019,>LE01Gene04720,>LE01Gene00733,>LE01Gene08279,>LE01Gene05567,	0.00899178		Cellular component	nuclear outer membrane-endoplasmic reticulum membrane network	GO:0042175	4	0.0087092	1.99941	13	44	421	2849	>LE01Gene04206,>LE01Gene01107,>LE01Gene11772,>LE01Gene06313,>LE01Gene07617,>LE01Gene10330,>LE01Gene07168,>LE01Gene09341,>LE01Gene00093,>LE01Gene00457,>LE01Gene08385,>LE01Gene04328,>LE01Gene01648,	0.0513542
Biological process	purine ribonucleoside diphosphate metabolic process	GO:0009179	10	0.00052	2.49166	14	33	970	5697	>LE01Gene02390,>LE01Gene11222,>LE01Gene09790,>LE01Gene07114,>LE01Gene04902,>LE01Gene14216,>LE01Gene03960,>LE01Gene03056,>LE01Gene06597,>LE01Gene03019,>LE01Gene04720,>LE01Gene00733,>LE01Gene08279,>LE01Gene05567,	0.00899178		Cellular component	transporter complex	GO:1990351	3	0.00913139	3.38361	5	10	421	2849	>LE01Gene02435,>LE01Gene05850,>LE01Gene08075,>LE01Gene10655,>LE01Gene02509,	0.0511956
Biological process	ribonucleoside diphosphate metabolic process	GO:0009185	9	0.00052	2.49166	14	33	970	5697	>LE01Gene02390,>LE01Gene11222,>LE01Gene09790,>LE01Gene07114,>LE01Gene04902,>LE01Gene14216,>LE01Gene03960,>LE01Gene03056,>LE01Gene06597,>LE01Gene03019,>LE01Gene04720,>LE01Gene00733,>LE01Gene08279,>LE01Gene05567,	0.00899178		Cellular component	outer membrane	GO:0019867	4	0.0105287	2.90024	6	14	421	2849	>LE01Gene05511,>LE01Gene00937,>LE01Gene09688,>LE01Gene00747,>LE01Gene11410,>LE01Gene09510,	0.0580778
Biological process	alcohol metabolic process	GO:0006066	5	0.00052	2.49166	14	33	970	5697	>LE01Gene03342,>LE01Gene05481,>LE01Gene10868,>LE01Gene11222,>LE01Gene09790,>LE01Gene04902,>LE01Gene03960,>LE01Gene06597,>LE01Gene06122,>LE01Gene03019,>LE01Gene02135,>LE01Gene11898,>LE01Gene04299,>LE01Gene05151,	0.00899178		Cellular component	endoplasmic reticulum	GO:0005783	6	0.0121602	1.69181	19	76	421	2849	>LE01Gene04206,>LE01Gene01523,>LE01Gene01107,>LE01Gene07270,>LE01Gene12618,>LE01Gene11772,>LE01Gene06313,>LE01Gene06357,>LE01Gene07617,>LE01Gene10330,>LE01Gene07168,>LE01Gene09341,>LE01Gene00093,>LE01Gene00457,>LE01Gene09670,>LE01Gene08385,>LE01Gene04328,>LE01Gene01648,>LE01Gene01688,	0.0660128
Biological process	response to extracellular stimulus	GO:0009991	4	0.000608	2.80892	11	23	970	5697	>LE01Gene11295,>LE01Gene02390,>LE01Gene11222,>LE01Gene01407,>LE01Gene04902,>LE01Gene02623,>LE01Gene03058,>LE01Gene03056,>LE01Gene06597,>LE01Gene00733,>LE01Gene11424,	0.00991028		Cellular component	chromatin	GO:0000785	3	0.0130173	1.77501	16	61	421	2849	>LE01Gene05520,>LE01Gene01532,>LE01Gene10066,>LE01Gene04609,>LE01Gene12144,>LE01Gene08065,>LE01Gene08055,>LE01Gene09319,>LE01Gene13783,>LE01Gene13301,>LE01Gene13300,>LE01Gene13784,>LE01Gene05299,>LE01Gene03840,>LE01Gene03839,>LE01Gene00778,	0.0695614
Biological process	transmembrane transport	GO:0055085	5	0.000706	1.32581	107	474	970	5697	>LE01Gene05504,>LE01Gene06812,>LE01Gene02405,>LE01Gene12209,>LE01Gene00682,>LE01Gene00206,>LE01Gene11335,>LE01Gene05946,>LE01Gene09063,>LE01Gene09437,>LE01Gene08555,>LE01Gene11300,>LE01Gene12647,>LE01Gene08151,>LE01Gene04136,>LE01Gene13090,>LE01Gene04140,>LE01Gene04153,>LE01Gene06781,>LE01Gene01038,>LE01Gene06727,>LE01Gene05854,>LE01Gene08936,>LE01Gene07606,>LE01Gene01084,>LE01Gene13022,>LE01Gene…	0.0113687		Cellular component	mitochondrial outer membrane	GO:0005741	7	0.0147401	3.07601	5	11	421	2849	>LE01Gene00937,>LE01Gene09688,>LE01Gene00747,>LE01Gene11410,>LE01Gene09510,	0.0775555
Biological process	glycosyl compound biosynthetic process	GO:1901659	6	0.000764	3.10934	9	17	970	5697	>LE01Gene05983,>LE01Gene02434,>LE01Gene01078,>LE01Gene09790,>LE01Gene10334,>LE01Gene12908,>LE01Gene02239,>LE01Gene07910,>LE01Gene03019,	0.0121776		Cellular component	organelle outer membrane	GO:0031968	6	0.0147401	3.07601	5	11	421	2849	>LE01Gene00937,>LE01Gene09688,>LE01Gene00747,>LE01Gene11410,>LE01Gene09510,	0.0775555
Biological process	polyol metabolic process	GO:0019751	6	0.000764	3.10934	9	17	970	5697	>LE01Gene11222,>LE01Gene09790,>LE01Gene04902,>LE01Gene06597,>LE01Gene06122,>LE01Gene03019,>LE01Gene11898,>LE01Gene04299,>LE01Gene05151,	0.0121776		Cellular component	cell wall	GO:0005618	4	0.0147774	2.49319	7	19	421	2849	>LE01Gene13539,>LE01Gene13506,>LE01Gene13552,>LE01Gene13554,>LE01Gene10826,>LE01Gene08487,>LE01Gene03013,	0.075431
Biological process	response to external stimulus	GO:0009605	3	0.000788	2.61031	12	27	970	5697	>LE01Gene11295,>LE01Gene02390,>LE01Gene11222,>LE01Gene01407,>LE01Gene04902,>LE01Gene02623,>LE01Gene03058,>LE01Gene03056,>LE01Gene06597,>LE01Gene00733,>LE01Gene11424,>LE01Gene04299,	0.012281		Cellular component	microtubule cytoskeleton	GO:0015630	7	0.0155911	1.82194	14	52	421	2849	>LE01Gene05546,>LE01Gene05437,>LE01Gene01434,>LE01Gene01435,>LE01Gene11633,>LE01Gene12981,>LE01Gene00049,>LE01Gene03108,>LE01Gene00089,>LE01Gene11519,>LE01Gene10693,>LE01Gene09610,>LE01Gene00757,>LE01Gene08622,	0.0784143
Biological process	alpha-amino acid biosynthetic process	GO:1901607	9	0.00087	1.76196	30	100	970	5697	>LE01Gene06881,>LE01Gene01520,>LE01Gene10056,>LE01Gene00628,>LE01Gene01963,>LE01Gene06329,>LE01Gene01907,>LE01Gene07681,>LE01Gene02397,>LE01Gene13891,>LE01Gene01477,>LE01Gene10765,>LE01Gene10334,>LE01Gene07177,>LE01Gene01364,>LE01Gene07980,>LE01Gene03960,>LE01Gene07012,>LE01Gene12832,>LE01Gene06195,>LE01Gene11906,>LE01Gene02192,>LE01Gene05603,>LE01Gene06992,>LE01Gene03841,>LE01Gene01640,>LE01Gene…	0.0132722		Cellular component	endomembrane system	GO:0012505	3	0.0161865	1.45683	31	144	421	2849	>LE01Gene04206,>LE01Gene01523,>LE01Gene01107,>LE01Gene09889,>LE01Gene07270,>LE01Gene12618,>LE01Gene11772,>LE01Gene06313,>LE01Gene06357,>LE01Gene07617,>LE01Gene01892,>LE01Gene08458,>LE01Gene07132,>LE01Gene10330,>LE01Gene07168,>LE01Gene09341,>LE01Gene00093,>LE01Gene00457,>LE01Gene13329,>LE01Gene09670,>LE01Gene01740,>LE01Gene08385,>LE01Gene08390,>LE01Gene03081,>LE01Gene03010,>LE01Gene04328,>LE01Gene…	0.0802288
Biological process	cellular amino acid metabolic process	GO:0006520	7	0.000943	1.36773	85	365	970	5697	>LE01Gene06881,>LE01Gene01199,>LE01Gene07739,>LE01Gene03348,>LE01Gene04205,>LE01Gene01520,>LE01Gene01586,>LE01Gene10058,>LE01Gene10056,>LE01Gene04619,>LE01Gene09080,>LE01Gene00628,>LE01Gene02831,>LE01Gene10460,>LE01Gene01963,>LE01Gene06329,>LE01Gene07630,>LE01Gene07632,>LE01Gene01907,>LE01Gene10868,>LE01Gene07681,>LE01Gene04173,>LE01Gene04998,>LE01Gene04519,>LE01Gene00166,>LE01Gene02397,>LE01Gene…	0.0142366		Cellular component	ribosomal subunit	GO:0044391	4	0.0178144	2.25574	8	24	421	2849	>LE01Gene14438,>LE01Gene00242,>LE01Gene08921,>LE01Gene00147,>LE01Gene00960,>LE01Gene00461,>LE01Gene03027,>LE01Gene01648,	0.087036
Biological process	purine nucleobase metabolic process	GO:0006144	8	0.000983	1.85861	25	79	970	5697	>LE01Gene05983,>LE01Gene13132,>LE01Gene06818,>LE01Gene02434,>LE01Gene01586,>LE01Gene02836,>LE01Gene10460,>LE01Gene04567,>LE01Gene08929,>LE01Gene00950,>LE01Gene10334,>LE01Gene07172,>LE01Gene09327,>LE01Gene05330,>LE01Gene04059,>LE01Gene02230,>LE01Gene07910,>LE01Gene00453,>LE01Gene10241,>LE01Gene01744,>LE01Gene03056,>LE01Gene08708,>LE01Gene06507,>LE01Gene00352,>LE01Gene04726,	0.0146906		Cellular component	external encapsulating structure	GO:0030312	3	0.0199192	2.36853	7	20	421	2849	>LE01Gene13539,>LE01Gene13506,>LE01Gene13552,>LE01Gene13554,>LE01Gene10826,>LE01Gene08487,>LE01Gene03013,	0.0959491
Biological process	nucleoside diphosphate metabolic process	GO:0009132	8	0.00113863	2.25892	15	39	970	5697	>LE01Gene02434,>LE01Gene02390,>LE01Gene11222,>LE01Gene09790,>LE01Gene07114,>LE01Gene04902,>LE01Gene14216,>LE01Gene03960,>LE01Gene03056,>LE01Gene06597,>LE01Gene03019,>LE01Gene04720,>LE01Gene00733,>LE01Gene08279,>LE01Gene05567,	0.0168329		Cellular component	obsolete cytoskeletal part	GO:0044430	0	0.021835	1.62413	18	75	421	2849	>LE01Gene05546,>LE01Gene01018,>LE01Gene05437,>LE01Gene01434,>LE01Gene01435,>LE01Gene11633,>LE01Gene12981,>LE01Gene00049,>LE01Gene03108,>LE01Gene00089,>LE01Gene11519,>LE01Gene10693,>LE01Gene03067,>LE01Gene09610,>LE01Gene09135,>LE01Gene00757,>LE01Gene08622,>LE01Gene07300,	0.0969815
Biological process	nucleotide phosphorylation	GO:0046939	7	0.00113863	2.25892	15	39	970	5697	>LE01Gene02434,>LE01Gene02390,>LE01Gene11222,>LE01Gene09790,>LE01Gene07114,>LE01Gene04902,>LE01Gene14216,>LE01Gene03960,>LE01Gene03056,>LE01Gene06597,>LE01Gene03019,>LE01Gene04720,>LE01Gene00733,>LE01Gene08279,>LE01Gene05567,	0.0168329		Cellular component	proton-transporting two-sector ATPase complex, catalytic domain	GO:0033178	4	0.0222618	2.81968	5	12	421	2849	>LE01Gene13008,>LE01Gene01885,>LE01Gene03585,>LE01Gene06610,>LE01Gene03007,	0.0976095
Biological process	proteolysis	GO:0006508	6	0.0012183	1.45017	60	243	970	5697	>LE01Gene01150,>LE01Gene06847,>LE01Gene06858,>LE01Gene02852,>LE01Gene05928,>LE01Gene04199,>LE01Gene09473,>LE01Gene11793,>LE01Gene13976,>LE01Gene13977,>LE01Gene00642,>LE01Gene04165,>LE01Gene07675,>LE01Gene03689,>LE01Gene05870,>LE01Gene13052,>LE01Gene12184,>LE01Gene05410,>LE01Gene05418,>LE01Gene01888,>LE01Gene04912,>LE01Gene07195,>LE01Gene05823,>LE01Gene04979,>LE01Gene14775,>LE01Gene08460,>LE01Gene…	0.0176468		Cellular component	cell periphery	GO:0071944	3	0.0227768	1.64347	17	70	421	2849	>LE01Gene13539,>LE01Gene13506,>LE01Gene13552,>LE01Gene13554,>LE01Gene08573,>LE01Gene09820,>LE01Gene10826,>LE01Gene01018,>LE01Gene08487,>LE01Gene04005,>LE01Gene13329,>LE01Gene11519,>LE01Gene02605,>LE01Gene03067,>LE01Gene03013,>LE01Gene05598,>LE01Gene07300,	0.0986034
Biological process	amine catabolic process	GO:0009310	6	0.00126419	3.91546	6	9	970	5697	>LE01Gene07739,>LE01Gene09080,>LE01Gene02539,>LE01Gene02540,>LE01Gene06090,>LE01Gene06091,	0.0181285		Cellular component	cellular anatomical entity	GO:0110165	2	0.0267334	1.01362	417	2784	421	2849	>LE01Gene00297,>LE01Gene03323,>LE01Gene06839,>LE01Gene01153,>LE01Gene05510,>LE01Gene05511,>LE01Gene01120,>LE01Gene00276,>LE01Gene01123,>LE01Gene14438,>LE01Gene12259,>LE01Gene00288,>LE01Gene13119,>LE01Gene03366,>LE01Gene05546,>LE01Gene05547,>LE01Gene03363,>LE01Gene02038,>LE01Gene04224,>LE01Gene03381,>LE01Gene05520,>LE01Gene03345,>LE01Gene02019,>LE01Gene04206,>LE01Gene14484,>LE01Gene10017,>LE01Gene…	0.110154
Biological process	benzene-containing compound metabolic process	GO:0042537	5	0.00129955	2.9366	9	18	970	5697	>LE01Gene09080,>LE01Gene02634,>LE01Gene02142,>LE01Gene03883,>LE01Gene02539,>LE01Gene02540,>LE01Gene03875,>LE01Gene06090,>LE01Gene06091,	0.018451		Cellular component	obsolete cell cortex part	GO:0044448	0	0.03189	2.60278	5	13	421	2849	>LE01Gene09820,>LE01Gene01018,>LE01Gene11519,>LE01Gene03067,>LE01Gene07300,	0.129838
Biological process	cellular amino acid biosynthetic process	GO:0008652	8	0.00147303	1.71064	30	103	970	5697	>LE01Gene06881,>LE01Gene01520,>LE01Gene10056,>LE01Gene00628,>LE01Gene01963,>LE01Gene06329,>LE01Gene01907,>LE01Gene07681,>LE01Gene02397,>LE01Gene13891,>LE01Gene01477,>LE01Gene10765,>LE01Gene10334,>LE01Gene07177,>LE01Gene01364,>LE01Gene07980,>LE01Gene03960,>LE01Gene07012,>LE01Gene12832,>LE01Gene06195,>LE01Gene11906,>LE01Gene02192,>LE01Gene05603,>LE01Gene06992,>LE01Gene03841,>LE01Gene01640,>LE01Gene…	0.020709		Cellular component	DNA polymerase complex	GO:0042575	6	0.0336834	2.15321	7	22	421	2849	>LE01Gene00640,>LE01Gene04172,>LE01Gene12179,>LE01Gene03549,>LE01Gene03496,>LE01Gene05682,>LE01Gene07785,	0.13395
Biological process	response to nutrient levels	GO:0031667	5	0.00175647	2.66963	10	22	970	5697	>LE01Gene02390,>LE01Gene11222,>LE01Gene01407,>LE01Gene04902,>LE01Gene02623,>LE01Gene03058,>LE01Gene03056,>LE01Gene06597,>LE01Gene00733,>LE01Gene11424,	0.0244542		Cellular component	catalytic complex	GO:1902494	3	0.0359409	1.25319	55	297	421	2849	>LE01Gene06839,>LE01Gene04224,>LE01Gene01541,>LE01Gene01553,>LE01Gene02435,>LE01Gene01107,>LE01Gene10066,>LE01Gene12240,>LE01Gene01563,>LE01Gene01992,>LE01Gene00640,>LE01Gene06313,>LE01Gene04172,>LE01Gene05850,>LE01Gene01014,>LE01Gene01076,>LE01Gene12179,>LE01Gene12551,>LE01Gene08075,>LE01Gene08458,>LE01Gene11633,>LE01Gene11610,>LE01Gene10320,>LE01Gene07168,>LE01Gene08868,>LE01Gene08839,>LE01Gene…	0.141285
Biological process	gluconeogenesis	GO:0006094	8	0.0019865	2.22229	14	37	970	5697	>LE01Gene02390,>LE01Gene11222,>LE01Gene09790,>LE01Gene07114,>LE01Gene04902,>LE01Gene14216,>LE01Gene03960,>LE01Gene03056,>LE01Gene06597,>LE01Gene03019,>LE01Gene04720,>LE01Gene00733,>LE01Gene08279,>LE01Gene05567,	0.0273908		Cellular component	supramolecular complex	GO:0099080	3	0.0360681	1.7278	12	47	421	2849	>LE01Gene05546,>LE01Gene05437,>LE01Gene01434,>LE01Gene01435,>LE01Gene11633,>LE01Gene12981,>LE01Gene00049,>LE01Gene03108,>LE01Gene00089,>LE01Gene11519,>LE01Gene00757,>LE01Gene08622,	0.140174
Biological process	IMP biosynthetic process	GO:0006188	12	0.00219864	4.19514	5	7	970	5697	>LE01Gene06818,>LE01Gene00950,>LE01Gene07172,>LE01Gene00453,>LE01Gene06507,	0.0300271		Cellular component	obsolete endoplasmic reticulum part	GO:0044432	0	0.0403868	1.65988	13	53	421	2849	>LE01Gene04206,>LE01Gene01107,>LE01Gene11772,>LE01Gene06313,>LE01Gene07617,>LE01Gene10330,>LE01Gene07168,>LE01Gene09341,>LE01Gene00093,>LE01Gene00457,>LE01Gene08385,>LE01Gene04328,>LE01Gene01648,	0.155194
Biological process	cellular metabolic compound salvage	GO:0043094	4	0.00219864	4.19514	5	7	970	5697	>LE01Gene05983,>LE01Gene06818,>LE01Gene01078,>LE01Gene10334,>LE01Gene04726,	0.0300271		Cellular component	cell cortex	GO:0005938	4	0.0437574	2.41686	5	14	421	2849	>LE01Gene09820,>LE01Gene01018,>LE01Gene11519,>LE01Gene03067,>LE01Gene07300,	0.166278
Biological process	tryptophan catabolic process	GO:0006569	10	0.00219864	4.19514	5	7	970	5697	>LE01Gene09080,>LE01Gene02539,>LE01Gene02540,>LE01Gene06090,>LE01Gene06091,	0.0300271		Cellular component	ribonucleoprotein complex	GO:1990904	3	0.0486933	1.23677	53	290	421	2849	>LE01Gene03323,>LE01Gene14438,>LE01Gene03363,>LE01Gene00242,>LE01Gene00662,>LE01Gene01960,>LE01Gene09867,>LE01Gene05499,>LE01Gene03244,>LE01Gene01045,>LE01Gene05411,>LE01Gene08921,>LE01Gene13881,>LE01Gene11238,>LE01Gene01898,>LE01Gene00147,>LE01Gene07135,>LE01Gene10309,>LE01Gene00960,>LE01Gene02727,>LE01Gene10342,>LE01Gene08868,>LE01Gene02296,>LE01Gene05327,>LE01Gene00911,>LE01Gene08401,>LE01Gene…	0.181012
Biological process	IMP metabolic process	GO:0046040	11	0.00219864	4.19514	5	7	970	5697	>LE01Gene06818,>LE01Gene00950,>LE01Gene07172,>LE01Gene00453,>LE01Gene06507,	0.0300271		Cellular component	nuclear envelope	GO:0005635	5	0.049841	2.13702	6	19	421	2849	>LE01Gene01892,>LE01Gene07132,>LE01Gene01740,>LE01Gene03081,>LE01Gene03010,>LE01Gene14074,	0.183286
Biological process	obsolete indolalkylamine catabolic process	GO:0046218	0	0.00219864	4.19514	5	7	970	5697	>LE01Gene09080,>LE01Gene02539,>LE01Gene02540,>LE01Gene06090,>LE01Gene06091,	0.0300271		Biological process	nucleoside triphosphate metabolic process	GO:0009141	8	0	4.04777	43	89	680	5697	>LE01Gene13123,>LE01Gene04224,>LE01Gene01553,>LE01Gene02435,>LE01Gene12240,>LE01Gene11377,>LE01Gene06315,>LE01Gene05464,>LE01Gene09851,>LE01Gene13008,>LE01Gene05850,>LE01Gene04586,>LE01Gene01076,>LE01Gene08075,>LE01Gene01885,>LE01Gene05820,>LE01Gene14307,>LE01Gene13422,>LE01Gene10320,>LE01Gene08432,>LE01Gene03585,>LE01Gene06610,>LE01Gene05778,>LE01Gene01780,>LE01Gene02208,>LE01Gene13331,>LE01Gene…	0
Biological process	indole-containing compound catabolic process	GO:0042436	6	0.00219864	4.19514	5	7	970	5697	>LE01Gene09080,>LE01Gene02539,>LE01Gene02540,>LE01Gene06090,>LE01Gene06091,	0.0300271		Biological process	purine nucleoside triphosphate metabolic process	GO:0009144	9	0	4.08923	41	84	680	5697	>LE01Gene13123,>LE01Gene04224,>LE01Gene01553,>LE01Gene02435,>LE01Gene12240,>LE01Gene11377,>LE01Gene06315,>LE01Gene09851,>LE01Gene13008,>LE01Gene05850,>LE01Gene04586,>LE01Gene01076,>LE01Gene08075,>LE01Gene01885,>LE01Gene05820,>LE01Gene14307,>LE01Gene13422,>LE01Gene10320,>LE01Gene08432,>LE01Gene03585,>LE01Gene06610,>LE01Gene05778,>LE01Gene01780,>LE01Gene02208,>LE01Gene10284,>LE01Gene03934,>LE01Gene…	0
Biological process	alpha-amino acid metabolic process	GO:1901605	8	0.00257336	1.34343	78	341	970	5697	>LE01Gene06881,>LE01Gene01199,>LE01Gene03348,>LE01Gene01520,>LE01Gene01586,>LE01Gene10056,>LE01Gene09080,>LE01Gene00628,>LE01Gene02831,>LE01Gene10460,>LE01Gene01963,>LE01Gene06329,>LE01Gene07630,>LE01Gene07632,>LE01Gene01907,>LE01Gene10868,>LE01Gene07681,>LE01Gene04173,>LE01Gene04998,>LE01Gene04519,>LE01Gene00166,>LE01Gene02397,>LE01Gene03252,>LE01Gene03256,>LE01Gene04585,>LE01Gene13891,>LE01Gene…	0.0332451		Biological process	ATP metabolic process	GO:0046034	11	0	4.18897	41	82	680	5697	>LE01Gene13123,>LE01Gene04224,>LE01Gene01553,>LE01Gene02435,>LE01Gene12240,>LE01Gene11377,>LE01Gene06315,>LE01Gene09851,>LE01Gene13008,>LE01Gene05850,>LE01Gene04586,>LE01Gene01076,>LE01Gene08075,>LE01Gene01885,>LE01Gene05820,>LE01Gene14307,>LE01Gene13422,>LE01Gene10320,>LE01Gene08432,>LE01Gene03585,>LE01Gene06610,>LE01Gene05778,>LE01Gene01780,>LE01Gene02208,>LE01Gene10284,>LE01Gene03934,>LE01Gene…	0
Biological process	hexose biosynthetic process	GO:0019319	7	0.0026617	2.16381	14	38	970	5697	>LE01Gene02390,>LE01Gene11222,>LE01Gene09790,>LE01Gene07114,>LE01Gene04902,>LE01Gene14216,>LE01Gene03960,>LE01Gene03056,>LE01Gene06597,>LE01Gene03019,>LE01Gene04720,>LE01Gene00733,>LE01Gene08279,>LE01Gene05567,	0.0340792		Biological process	ribonucleoside triphosphate metabolic process	GO:0009199	9	0	3.99413	41	86	680	5697	>LE01Gene13123,>LE01Gene04224,>LE01Gene01553,>LE01Gene02435,>LE01Gene12240,>LE01Gene11377,>LE01Gene06315,>LE01Gene09851,>LE01Gene13008,>LE01Gene05850,>LE01Gene04586,>LE01Gene01076,>LE01Gene08075,>LE01Gene01885,>LE01Gene05820,>LE01Gene14307,>LE01Gene13422,>LE01Gene10320,>LE01Gene08432,>LE01Gene03585,>LE01Gene06610,>LE01Gene05778,>LE01Gene01780,>LE01Gene02208,>LE01Gene10284,>LE01Gene03934,>LE01Gene…	0
Biological process	monosaccharide biosynthetic process	GO:0046364	6	0.0026617	2.16381	14	38	970	5697	>LE01Gene02390,>LE01Gene11222,>LE01Gene09790,>LE01Gene07114,>LE01Gene04902,>LE01Gene14216,>LE01Gene03960,>LE01Gene03056,>LE01Gene06597,>LE01Gene03019,>LE01Gene04720,>LE01Gene00733,>LE01Gene08279,>LE01Gene05567,	0.0340792		Biological process	purine ribonucleoside triphosphate metabolic process	GO:0009205	10	0	4.08923	41	84	680	5697	>LE01Gene13123,>LE01Gene04224,>LE01Gene01553,>LE01Gene02435,>LE01Gene12240,>LE01Gene11377,>LE01Gene06315,>LE01Gene09851,>LE01Gene13008,>LE01Gene05850,>LE01Gene04586,>LE01Gene01076,>LE01Gene08075,>LE01Gene01885,>LE01Gene05820,>LE01Gene14307,>LE01Gene13422,>LE01Gene10320,>LE01Gene08432,>LE01Gene03585,>LE01Gene06610,>LE01Gene05778,>LE01Gene01780,>LE01Gene02208,>LE01Gene10284,>LE01Gene03934,>LE01Gene…	0
Biological process	nucleoside biosynthetic process	GO:0009163	8	0.00269163	3.16249	7	13	970	5697	>LE01Gene05983,>LE01Gene02434,>LE01Gene01078,>LE01Gene10334,>LE01Gene12908,>LE01Gene02239,>LE01Gene07910,	0.0338579		Biological process	cellular respiration	GO:0045333	6	3.33e-15	4.18897	35	70	680	5697	>LE01Gene13123,>LE01Gene01135,>LE01Gene01549,>LE01Gene02435,>LE01Gene12240,>LE01Gene01574,>LE01Gene11377,>LE01Gene09851,>LE01Gene13008,>LE01Gene05850,>LE01Gene03245,>LE01Gene01076,>LE01Gene08075,>LE01Gene01885,>LE01Gene08443,>LE01Gene10348,>LE01Gene10320,>LE01Gene08432,>LE01Gene03585,>LE01Gene05778,>LE01Gene02208,>LE01Gene06179,>LE01Gene10683,>LE01Gene10685,>LE01Gene03065,>LE01Gene02186,>LE01Gene…	6.44e-13
Biological process	ribonucleoside biosynthetic process	GO:0042455	9	0.00269163	3.16249	7	13	970	5697	>LE01Gene05983,>LE01Gene02434,>LE01Gene01078,>LE01Gene10334,>LE01Gene12908,>LE01Gene02239,>LE01Gene07910,	0.0338579		Biological process	nucleoside monophosphate metabolic process	GO:0009123	8	4.33e-15	3.56685	43	101	680	5697	>LE01Gene13123,>LE01Gene04224,>LE01Gene01553,>LE01Gene02435,>LE01Gene12240,>LE01Gene11377,>LE01Gene06315,>LE01Gene09851,>LE01Gene13008,>LE01Gene05850,>LE01Gene04586,>LE01Gene01076,>LE01Gene08075,>LE01Gene01885,>LE01Gene05820,>LE01Gene14307,>LE01Gene13422,>LE01Gene10320,>LE01Gene03156,>LE01Gene08432,>LE01Gene03585,>LE01Gene06610,>LE01Gene05778,>LE01Gene01780,>LE01Gene02208,>LE01Gene13331,>LE01Gene…	7.18e-13
Biological process	cellular carbohydrate metabolic process	GO:0044262	5	0.00300399	1.62562	31	112	970	5697	>LE01Gene12203,>LE01Gene01103,>LE01Gene00256,>LE01Gene01999,>LE01Gene00638,>LE01Gene11222,>LE01Gene13404,>LE01Gene04913,>LE01Gene01448,>LE01Gene09790,>LE01Gene07108,>LE01Gene04902,>LE01Gene12986,>LE01Gene02639,>LE01Gene13789,>LE01Gene10632,>LE01Gene13706,>LE01Gene06597,>LE01Gene06122,>LE01Gene05622,>LE01Gene05620,>LE01Gene03019,>LE01Gene06973,>LE01Gene02144,>LE01Gene13684,>LE01Gene09188,>LE01Gene…	0.0371355		Biological process	purine nucleoside monophosphate metabolic process	GO:0009126	9	7.11e-15	3.65421	41	94	680	5697	>LE01Gene13123,>LE01Gene04224,>LE01Gene01553,>LE01Gene02435,>LE01Gene12240,>LE01Gene11377,>LE01Gene06315,>LE01Gene09851,>LE01Gene13008,>LE01Gene05850,>LE01Gene04586,>LE01Gene01076,>LE01Gene08075,>LE01Gene01885,>LE01Gene05820,>LE01Gene14307,>LE01Gene13422,>LE01Gene10320,>LE01Gene08432,>LE01Gene03585,>LE01Gene06610,>LE01Gene05778,>LE01Gene01780,>LE01Gene02208,>LE01Gene10284,>LE01Gene03934,>LE01Gene…	1.03e-12
Biological process	nucleobase metabolic process	GO:0009112	7	0.00309713	1.68698	27	94	970	5697	>LE01Gene05983,>LE01Gene13132,>LE01Gene06818,>LE01Gene13510,>LE01Gene02434,>LE01Gene01586,>LE01Gene02836,>LE01Gene10460,>LE01Gene01078,>LE01Gene04567,>LE01Gene08929,>LE01Gene00950,>LE01Gene10334,>LE01Gene07172,>LE01Gene09327,>LE01Gene05330,>LE01Gene04059,>LE01Gene02230,>LE01Gene07910,>LE01Gene00453,>LE01Gene10241,>LE01Gene01744,>LE01Gene03056,>LE01Gene08708,>LE01Gene06507,>LE01Gene00352,>LE01Gene…	0.0379597		Biological process	purine ribonucleoside monophosphate metabolic process	GO:0009167	10	7.11e-15	3.65421	41	94	680	5697	>LE01Gene13123,>LE01Gene04224,>LE01Gene01553,>LE01Gene02435,>LE01Gene12240,>LE01Gene11377,>LE01Gene06315,>LE01Gene09851,>LE01Gene13008,>LE01Gene05850,>LE01Gene04586,>LE01Gene01076,>LE01Gene08075,>LE01Gene01885,>LE01Gene05820,>LE01Gene14307,>LE01Gene13422,>LE01Gene10320,>LE01Gene08432,>LE01Gene03585,>LE01Gene06610,>LE01Gene05778,>LE01Gene01780,>LE01Gene02208,>LE01Gene10284,>LE01Gene03934,>LE01Gene…	1.03e-12
Biological process	L-phenylalanine metabolic process	GO:0006558	10	0.00329864	2.2735	12	31	970	5697	>LE01Gene06881,>LE01Gene01520,>LE01Gene01477,>LE01Gene10765,>LE01Gene07177,>LE01Gene02634,>LE01Gene07012,>LE01Gene12832,>LE01Gene06195,>LE01Gene03883,>LE01Gene03875,>LE01Gene04720,	0.0400868		Biological process	purine ribonucleotide metabolic process	GO:0009150	10	1.03e-14	3.44513	44	107	680	5697	>LE01Gene13123,>LE01Gene04224,>LE01Gene01553,>LE01Gene02435,>LE01Gene12240,>LE01Gene11377,>LE01Gene11772,>LE01Gene06315,>LE01Gene09851,>LE01Gene13008,>LE01Gene05850,>LE01Gene04586,>LE01Gene01076,>LE01Gene08075,>LE01Gene01885,>LE01Gene05820,>LE01Gene14307,>LE01Gene13422,>LE01Gene10320,>LE01Gene08432,>LE01Gene03585,>LE01Gene06610,>LE01Gene05778,>LE01Gene01780,>LE01Gene02208,>LE01Gene10284,>LE01Gene…	1.2e-12
Biological process	aromatic amino acid family biosynthetic process	GO:0009073	9	0.00329864	2.2735	12	31	970	5697	>LE01Gene06881,>LE01Gene01520,>LE01Gene01477,>LE01Gene10765,>LE01Gene07177,>LE01Gene07012,>LE01Gene12832,>LE01Gene06195,>LE01Gene05603,>LE01Gene01640,>LE01Gene04720,>LE01Gene07329,	0.0400868		Biological process	ribonucleoside monophosphate metabolic process	GO:0009161	9	1.68e-14	3.51874	42	100	680	5697	>LE01Gene13123,>LE01Gene04224,>LE01Gene01553,>LE01Gene02435,>LE01Gene12240,>LE01Gene11377,>LE01Gene06315,>LE01Gene09851,>LE01Gene13008,>LE01Gene05850,>LE01Gene04586,>LE01Gene01076,>LE01Gene08075,>LE01Gene01885,>LE01Gene05820,>LE01Gene14307,>LE01Gene13422,>LE01Gene10320,>LE01Gene03156,>LE01Gene08432,>LE01Gene03585,>LE01Gene06610,>LE01Gene05778,>LE01Gene01780,>LE01Gene02208,>LE01Gene10284,>LE01Gene…	1.77e-12
Biological process	erythrose 4-phosphate/phosphoenolpyruvate family amino acid metabolic process	GO:1902221	9	0.00329864	2.2735	12	31	970	5697	>LE01Gene06881,>LE01Gene01520,>LE01Gene01477,>LE01Gene10765,>LE01Gene07177,>LE01Gene02634,>LE01Gene07012,>LE01Gene12832,>LE01Gene06195,>LE01Gene03883,>LE01Gene03875,>LE01Gene04720,	0.0400868		Biological process	aerobic respiration	GO:0009060	7	1.78e-14	4.12826	34	69	680	5697	>LE01Gene13123,>LE01Gene01135,>LE01Gene01549,>LE01Gene02435,>LE01Gene12240,>LE01Gene01574,>LE01Gene11377,>LE01Gene09851,>LE01Gene13008,>LE01Gene05850,>LE01Gene01076,>LE01Gene08075,>LE01Gene01885,>LE01Gene08443,>LE01Gene10348,>LE01Gene10320,>LE01Gene08432,>LE01Gene03585,>LE01Gene05778,>LE01Gene02208,>LE01Gene06179,>LE01Gene10683,>LE01Gene10685,>LE01Gene03065,>LE01Gene02186,>LE01Gene06114,>LE01Gene…	1.72e-12
Biological process	carbohydrate derivative biosynthetic process	GO:1901137	5	0.00351121	1.57235	34	127	970	5697	>LE01Gene05983,>LE01Gene06818,>LE01Gene02434,>LE01Gene01586,>LE01Gene02420,>LE01Gene10460,>LE01Gene01078,>LE01Gene02390,>LE01Gene11222,>LE01Gene09790,>LE01Gene00950,>LE01Gene07114,>LE01Gene10334,>LE01Gene07172,>LE01Gene02724,>LE01Gene04902,>LE01Gene00996,>LE01Gene12908,>LE01Gene02239,>LE01Gene14216,>LE01Gene07910,>LE01Gene07980,>LE01Gene03960,>LE01Gene00453,>LE01Gene03056,>LE01Gene06597,>LE01Gene…	0.0416122		Biological process	energy derivation by oxidation of organic compounds	GO:0015980	5	2.38e-14	3.91696	36	77	680	5697	>LE01Gene13123,>LE01Gene01135,>LE01Gene01549,>LE01Gene02435,>LE01Gene12240,>LE01Gene01574,>LE01Gene11377,>LE01Gene09851,>LE01Gene13008,>LE01Gene05850,>LE01Gene01014,>LE01Gene03245,>LE01Gene01076,>LE01Gene08075,>LE01Gene01885,>LE01Gene08443,>LE01Gene10348,>LE01Gene10320,>LE01Gene08432,>LE01Gene03585,>LE01Gene05778,>LE01Gene02208,>LE01Gene06179,>LE01Gene10683,>LE01Gene10685,>LE01Gene03065,>LE01Gene…	2.12e-12
Biological process	monocarboxylic acid biosynthetic process	GO:0072330	8	0.00356693	1.75433	23	77	970	5697	>LE01Gene08952,>LE01Gene01907,>LE01Gene02390,>LE01Gene01423,>LE01Gene11222,>LE01Gene01407,>LE01Gene09790,>LE01Gene07114,>LE01Gene04902,>LE01Gene14216,>LE01Gene03960,>LE01Gene09272,>LE01Gene03056,>LE01Gene02192,>LE01Gene06597,>LE01Gene03019,>LE01Gene03883,>LE01Gene04720,>LE01Gene00733,>LE01Gene08279,>LE01Gene02095,>LE01Gene05567,>LE01Gene04283,	0.041926		Biological process	purine nucleotide metabolic process	GO:0006163	9	4.93e-14	3.32099	44	111	680	5697	>LE01Gene13123,>LE01Gene04224,>LE01Gene01553,>LE01Gene02435,>LE01Gene12240,>LE01Gene11377,>LE01Gene11772,>LE01Gene06315,>LE01Gene09851,>LE01Gene13008,>LE01Gene05850,>LE01Gene04586,>LE01Gene01076,>LE01Gene08075,>LE01Gene01885,>LE01Gene05820,>LE01Gene14307,>LE01Gene13422,>LE01Gene10320,>LE01Gene08432,>LE01Gene03585,>LE01Gene06610,>LE01Gene05778,>LE01Gene01780,>LE01Gene02208,>LE01Gene10284,>LE01Gene…	4.09e-12
Biological process	aspartate family amino acid metabolic process	GO:0009066	9	0.00364408	1.66922	27	95	970	5697	>LE01Gene01586,>LE01Gene00628,>LE01Gene10460,>LE01Gene07630,>LE01Gene07632,>LE01Gene10868,>LE01Gene07681,>LE01Gene04998,>LE01Gene04519,>LE01Gene00166,>LE01Gene02397,>LE01Gene03256,>LE01Gene12537,>LE01Gene10334,>LE01Gene03960,>LE01Gene12831,>LE01Gene08387,>LE01Gene12401,>LE01Gene11906,>LE01Gene06989,>LE01Gene06507,>LE01Gene03841,>LE01Gene06092,>LE01Gene08279,>LE01Gene11894,>LE01Gene08627,>LE01Gene…	0.040825		Biological process	ribonucleotide metabolic process	GO:0009259	9	7.19e-14	3.29133	44	112	680	5697	>LE01Gene13123,>LE01Gene04224,>LE01Gene01553,>LE01Gene02435,>LE01Gene12240,>LE01Gene11377,>LE01Gene11772,>LE01Gene06315,>LE01Gene09851,>LE01Gene13008,>LE01Gene05850,>LE01Gene04586,>LE01Gene01076,>LE01Gene08075,>LE01Gene01885,>LE01Gene05820,>LE01Gene14307,>LE01Gene13422,>LE01Gene10320,>LE01Gene08432,>LE01Gene03585,>LE01Gene06610,>LE01Gene05778,>LE01Gene01780,>LE01Gene02208,>LE01Gene10284,>LE01Gene…	5.57e-12
Biological process	obsolete cofactor biosynthetic process	GO:0051188	0	0.00367419	1.59273	32	118	970	5697	>LE01Gene13915,>LE01Gene10457,>LE01Gene08952,>LE01Gene01907,>LE01Gene02390,>LE01Gene01422,>LE01Gene01423,>LE01Gene11222,>LE01Gene09790,>LE01Gene11602,>LE01Gene07114,>LE01Gene01873,>LE01Gene04902,>LE01Gene09703,>LE01Gene05356,>LE01Gene14216,>LE01Gene03112,>LE01Gene03960,>LE01Gene09272,>LE01Gene03056,>LE01Gene02192,>LE01Gene06597,>LE01Gene03019,>LE01Gene02975,>LE01Gene02988,>LE01Gene02539,>LE01Gene…	0.0408433		Biological process	proton transmembrane transport	GO:1902600	9	4.11e-13	4.42608	28	53	680	5697	>LE01Gene13123,>LE01Gene01120,>LE01Gene12240,>LE01Gene09851,>LE01Gene06352,>LE01Gene13008,>LE01Gene05850,>LE01Gene04586,>LE01Gene01076,>LE01Gene08075,>LE01Gene01885,>LE01Gene14307,>LE01Gene10320,>LE01Gene08432,>LE01Gene03585,>LE01Gene06610,>LE01Gene05778,>LE01Gene01780,>LE01Gene10225,>LE01Gene03934,>LE01Gene06179,>LE01Gene10683,>LE01Gene02186,>LE01Gene03007,>LE01Gene08280,>LE01Gene09140,>LE01Gene…	2.98e-11
Biological process	dicarboxylic acid biosynthetic process	GO:0043650	8	0.00392469	2.76386	8	17	970	5697	>LE01Gene06329,>LE01Gene07177,>LE01Gene09703,>LE01Gene06195,>LE01Gene06992,>LE01Gene02988,>LE01Gene02539,>LE01Gene02540,	0.0432923		Biological process	DNA replication	GO:0006260	8	9.1e-13	3.88542	32	69	680	5697	>LE01Gene06839,>LE01Gene02458,>LE01Gene03366,>LE01Gene13527,>LE01Gene10059,>LE01Gene00240,>LE01Gene00640,>LE01Gene05470,>LE01Gene08526,>LE01Gene04172,>LE01Gene12179,>LE01Gene08065,>LE01Gene01474,>LE01Gene03631,>LE01Gene09769,>LE01Gene10312,>LE01Gene11651,>LE01Gene05332,>LE01Gene00925,>LE01Gene03549,>LE01Gene08815,>LE01Gene02290,>LE01Gene03142,>LE01Gene00430,>LE01Gene01263,>LE01Gene05607,>LE01Gene…	6.22e-11
Biological process	ribonucleoside triphosphate biosynthetic process	GO:0009201	10	0.0043775	1.95773	16	48	970	5697	>LE01Gene02434,>LE01Gene01078,>LE01Gene02390,>LE01Gene11222,>LE01Gene09790,>LE01Gene07114,>LE01Gene04902,>LE01Gene14216,>LE01Gene03960,>LE01Gene03056,>LE01Gene06597,>LE01Gene03019,>LE01Gene04720,>LE01Gene00733,>LE01Gene08279,>LE01Gene05567,	0.0479185		Biological process	oxidative phosphorylation	GO:0006119	8	1.11e-12	5.07086	23	38	680	5697	>LE01Gene13123,>LE01Gene02435,>LE01Gene12240,>LE01Gene09851,>LE01Gene13008,>LE01Gene05850,>LE01Gene01076,>LE01Gene08075,>LE01Gene01885,>LE01Gene10320,>LE01Gene08432,>LE01Gene03585,>LE01Gene05778,>LE01Gene02208,>LE01Gene06179,>LE01Gene10683,>LE01Gene02186,>LE01Gene03007,>LE01Gene13274,>LE01Gene08280,>LE01Gene02509,>LE01Gene11013,>LE01Gene04234,	7.19e-11
Biological process	reactive oxygen species metabolic process	GO:0072593	4	0.00504237	3.67075	5	8	970	5697	>LE01Gene09060,>LE01Gene08997,>LE01Gene10767,>LE01Gene04245,>LE01Gene04299,	0.0516483		Biological process	ribose phosphate metabolic process	GO:0019693	6	3.84e-12	2.94537	45	128	680	5697	>LE01Gene13123,>LE01Gene04224,>LE01Gene01553,>LE01Gene02435,>LE01Gene12240,>LE01Gene11377,>LE01Gene11772,>LE01Gene06315,>LE01Gene09851,>LE01Gene13008,>LE01Gene05850,>LE01Gene04586,>LE01Gene01076,>LE01Gene08075,>LE01Gene01885,>LE01Gene05820,>LE01Gene14307,>LE01Gene13422,>LE01Gene10320,>LE01Gene03156,>LE01Gene08432,>LE01Gene03585,>LE01Gene06610,>LE01Gene05778,>LE01Gene01780,>LE01Gene02208,>LE01Gene…	2.35e-10
Biological process	cellular biogenic amine catabolic process	GO:0042402	7	0.00504237	3.67075	5	8	970	5697	>LE01Gene09080,>LE01Gene02539,>LE01Gene02540,>LE01Gene06090,>LE01Gene06091,	0.0516483		Biological process	generation of precursor metabolites and energy	GO:0006091	4	8.75e-12	2.92563	44	126	680	5697	>LE01Gene13123,>LE01Gene01135,>LE01Gene04224,>LE01Gene01549,>LE01Gene01553,>LE01Gene02435,>LE01Gene12240,>LE01Gene01574,>LE01Gene11377,>LE01Gene09851,>LE01Gene13008,>LE01Gene05850,>LE01Gene01014,>LE01Gene03245,>LE01Gene01076,>LE01Gene08075,>LE01Gene01885,>LE01Gene05820,>LE01Gene13422,>LE01Gene08443,>LE01Gene10348,>LE01Gene10320,>LE01Gene03156,>LE01Gene08432,>LE01Gene03585,>LE01Gene05778,>LE01Gene…	5.08e-10
Biological process	small molecule catabolic process	GO:0044282	4	0.00532347	1.77976	20	66	970	5697	>LE01Gene04619,>LE01Gene09080,>LE01Gene02397,>LE01Gene01407,>LE01Gene14216,>LE01Gene03960,>LE01Gene02634,>LE01Gene00476,>LE01Gene05216,>LE01Gene02192,>LE01Gene06122,>LE01Gene05620,>LE01Gene06992,>LE01Gene00332,>LE01Gene03883,>LE01Gene02539,>LE01Gene02540,>LE01Gene06090,>LE01Gene06091,>LE01Gene08279,	0.0537595		Biological process	nucleoside phosphate metabolic process	GO:0006753	7	7.27e-11	2.51823	52	173	680	5697	>LE01Gene06839,>LE01Gene13123,>LE01Gene04224,>LE01Gene01553,>LE01Gene02435,>LE01Gene12240,>LE01Gene11377,>LE01Gene08137,>LE01Gene11772,>LE01Gene06315,>LE01Gene05464,>LE01Gene09851,>LE01Gene13008,>LE01Gene05850,>LE01Gene04586,>LE01Gene03255,>LE01Gene01076,>LE01Gene08075,>LE01Gene01885,>LE01Gene05820,>LE01Gene14307,>LE01Gene13422,>LE01Gene10320,>LE01Gene03156,>LE01Gene08432,>LE01Gene02243,>LE01Gene…	4.02e-09
Biological process	nucleoside triphosphate biosynthetic process	GO:0009142	9	0.00549693	1.91778	16	49	970	5697	>LE01Gene02434,>LE01Gene01078,>LE01Gene02390,>LE01Gene11222,>LE01Gene09790,>LE01Gene07114,>LE01Gene04902,>LE01Gene14216,>LE01Gene03960,>LE01Gene03056,>LE01Gene06597,>LE01Gene03019,>LE01Gene04720,>LE01Gene00733,>LE01Gene08279,>LE01Gene05567,	0.0551231		Biological process	respiratory electron transport chain	GO:0022904	6	1.57e-10	5.82813	16	23	680	5697	>LE01Gene13123,>LE01Gene02435,>LE01Gene12240,>LE01Gene09851,>LE01Gene03245,>LE01Gene01076,>LE01Gene10320,>LE01Gene08432,>LE01Gene05778,>LE01Gene06179,>LE01Gene10683,>LE01Gene02186,>LE01Gene13274,>LE01Gene08280,>LE01Gene02509,>LE01Gene04234,	8.31e-09
Biological process	xenobiotic catabolic process	GO:0042178	5	0.00597982	2.06356	13	37	970	5697	>LE01Gene09060,>LE01Gene07656,>LE01Gene08997,>LE01Gene11646,>LE01Gene02230,>LE01Gene03960,>LE01Gene02634,>LE01Gene05686,>LE01Gene02142,>LE01Gene03883,>LE01Gene03875,>LE01Gene08279,>LE01Gene04245,	0.059549		Biological process	purine-containing compound metabolic process	GO:0072521	5	1.58e-10	2.52348	50	166	680	5697	>LE01Gene06839,>LE01Gene13123,>LE01Gene04224,>LE01Gene01541,>LE01Gene01553,>LE01Gene02435,>LE01Gene12240,>LE01Gene11377,>LE01Gene11772,>LE01Gene06315,>LE01Gene07689,>LE01Gene09851,>LE01Gene13008,>LE01Gene05850,>LE01Gene08932,>LE01Gene04586,>LE01Gene01076,>LE01Gene08075,>LE01Gene01885,>LE01Gene05820,>LE01Gene14307,>LE01Gene13422,>LE01Gene10320,>LE01Gene03156,>LE01Gene08432,>LE01Gene03585,>LE01Gene…	7.98e-09
Biological process	regulation of translational elongation	GO:0006448	9	0.0060248	2.61031	8	18	970	5697	>LE01Gene12685,>LE01Gene06351,>LE01Gene04537,>LE01Gene06725,>LE01Gene03252,>LE01Gene07174,>LE01Gene05679,>LE01Gene10513,	0.0595832		Biological process	electron transport chain	GO:0022900	5	4.46e-10	5.275	17	27	680	5697	>LE01Gene13123,>LE01Gene02435,>LE01Gene12240,>LE01Gene09851,>LE01Gene03245,>LE01Gene01076,>LE01Gene10320,>LE01Gene08432,>LE01Gene05778,>LE01Gene06179,>LE01Gene10683,>LE01Gene02186,>LE01Gene13274,>LE01Gene02513,>LE01Gene08280,>LE01Gene02509,>LE01Gene04234,	2.16e-08
Biological process	nucleobase-containing compound catabolic process	GO:0034655	6	0.00640663	1.75319	20	67	970	5697	>LE01Gene05977,>LE01Gene10018,>LE01Gene02390,>LE01Gene11222,>LE01Gene09790,>LE01Gene07114,>LE01Gene04902,>LE01Gene10314,>LE01Gene14216,>LE01Gene04457,>LE01Gene03960,>LE01Gene11106,>LE01Gene10241,>LE01Gene03056,>LE01Gene06597,>LE01Gene03019,>LE01Gene04720,>LE01Gene00733,>LE01Gene08279,>LE01Gene05567,	0.0629254		Biological process	cellular component organization or biogenesis	GO:0071840	3	5.91e-10	1.81095	99	458	680	5697	>LE01Gene03323,>LE01Gene05993,>LE01Gene05510,>LE01Gene14438,>LE01Gene03366,>LE01Gene03363,>LE01Gene02038,>LE01Gene05520,>LE01Gene02019,>LE01Gene13145,>LE01Gene12689,>LE01Gene13539,>LE01Gene13506,>LE01Gene01533,>LE01Gene10059,>LE01Gene10066,>LE01Gene00242,>LE01Gene13552,>LE01Gene13554,>LE01Gene09893,>LE01Gene08568,>LE01Gene00662,>LE01Gene01960,>LE01Gene05096,>LE01Gene07645,>LE01Gene10826,>LE01Gene…	2.74e-08
Biological process	alanine metabolic process	GO:0006522	10	0.00697273	2.40267	9	22	970	5697	>LE01Gene01586,>LE01Gene10460,>LE01Gene04519,>LE01Gene03256,>LE01Gene12537,>LE01Gene12831,>LE01Gene12401,>LE01Gene11906,>LE01Gene06507,	0.0680197		Biological process	energy coupled proton transport, down electrochemical gradient	GO:0015985	10	6.98e-10	7.67978	11	12	680	5697	>LE01Gene13008,>LE01Gene04586,>LE01Gene01885,>LE01Gene14307,>LE01Gene03585,>LE01Gene06610,>LE01Gene01780,>LE01Gene03934,>LE01Gene03007,>LE01Gene09140,>LE01Gene03869,	3.12e-08
Biological process	pyruvate family amino acid metabolic process	GO:0009078	9	0.00697273	2.40267	9	22	970	5697	>LE01Gene01586,>LE01Gene10460,>LE01Gene04519,>LE01Gene03256,>LE01Gene12537,>LE01Gene12831,>LE01Gene12401,>LE01Gene11906,>LE01Gene06507,	0.0680197		Biological process	proton motive force-driven ATP synthesis	GO:0015986	13	6.98e-10	7.67978	11	12	680	5697	>LE01Gene13008,>LE01Gene04586,>LE01Gene01885,>LE01Gene14307,>LE01Gene03585,>LE01Gene06610,>LE01Gene01780,>LE01Gene03934,>LE01Gene03007,>LE01Gene09140,>LE01Gene03869,	3.12e-08
Biological process	purine nucleoside triphosphate biosynthetic process	GO:0009145	10	0.00718146	1.91517	15	46	970	5697	>LE01Gene02434,>LE01Gene02390,>LE01Gene11222,>LE01Gene09790,>LE01Gene07114,>LE01Gene04902,>LE01Gene14216,>LE01Gene03960,>LE01Gene03056,>LE01Gene06597,>LE01Gene03019,>LE01Gene04720,>LE01Gene00733,>LE01Gene08279,>LE01Gene05567,	0.0691156		Biological process	aerobic electron transport chain	GO:0019646	8	9.38e-10	5.71223	15	22	680	5697	>LE01Gene13123,>LE01Gene02435,>LE01Gene12240,>LE01Gene09851,>LE01Gene01076,>LE01Gene10320,>LE01Gene08432,>LE01Gene05778,>LE01Gene06179,>LE01Gene10683,>LE01Gene02186,>LE01Gene13274,>LE01Gene08280,>LE01Gene02509,>LE01Gene04234,	3.89e-08
Biological process	purine ribonucleoside triphosphate biosynthetic process	GO:0009206	11	0.00718146	1.91517	15	46	970	5697	>LE01Gene02434,>LE01Gene02390,>LE01Gene11222,>LE01Gene09790,>LE01Gene07114,>LE01Gene04902,>LE01Gene14216,>LE01Gene03960,>LE01Gene03056,>LE01Gene06597,>LE01Gene03019,>LE01Gene04720,>LE01Gene00733,>LE01Gene08279,>LE01Gene05567,	0.0691156		Biological process	ATP synthesis coupled electron transport	GO:0042773	7	9.38e-10	5.71223	15	22	680	5697	>LE01Gene13123,>LE01Gene02435,>LE01Gene12240,>LE01Gene09851,>LE01Gene01076,>LE01Gene10320,>LE01Gene08432,>LE01Gene05778,>LE01Gene06179,>LE01Gene10683,>LE01Gene02186,>LE01Gene13274,>LE01Gene08280,>LE01Gene02509,>LE01Gene04234,	3.89e-08
Biological process	ribonucleoside metabolic process	GO:0009119	8	0.00737264	2.74082	7	15	970	5697	>LE01Gene05983,>LE01Gene02434,>LE01Gene01078,>LE01Gene10334,>LE01Gene12908,>LE01Gene02239,>LE01Gene07910,	0.0700157		Biological process	mitochondrial ATP synthesis coupled electron transport	GO:0042775	8	9.38e-10	5.71223	15	22	680	5697	>LE01Gene13123,>LE01Gene02435,>LE01Gene12240,>LE01Gene09851,>LE01Gene01076,>LE01Gene10320,>LE01Gene08432,>LE01Gene05778,>LE01Gene06179,>LE01Gene10683,>LE01Gene02186,>LE01Gene13274,>LE01Gene08280,>LE01Gene02509,>LE01Gene04234,	3.89e-08
Biological process	amino acid transport	GO:0006865	7	0.00752823	2.25892	10	26	970	5697	>LE01Gene12209,>LE01Gene08151,>LE01Gene03637,>LE01Gene07118,>LE01Gene04028,>LE01Gene07949,>LE01Gene06516,>LE01Gene04797,>LE01Gene01666,>LE01Gene03390,	0.0710229		Biological process	organophosphate metabolic process	GO:0019637	5	1.14e-09	2.10245	66	263	680	5697	>LE01Gene06839,>LE01Gene13123,>LE01Gene04224,>LE01Gene00690,>LE01Gene01553,>LE01Gene02435,>LE01Gene12240,>LE01Gene00230,>LE01Gene11377,>LE01Gene08137,>LE01Gene01992,>LE01Gene11772,>LE01Gene06315,>LE01Gene05464,>LE01Gene09851,>LE01Gene13008,>LE01Gene05850,>LE01Gene04586,>LE01Gene03255,>LE01Gene01076,>LE01Gene08075,>LE01Gene01885,>LE01Gene05820,>LE01Gene03658,>LE01Gene14307,>LE01Gene13422,>LE01Gene…	4.29e-08
Biological process	amino acid transmembrane transport	GO:0003333	9	0.00752823	2.25892	10	26	970	5697	>LE01Gene12209,>LE01Gene08151,>LE01Gene03637,>LE01Gene07118,>LE01Gene04028,>LE01Gene07949,>LE01Gene06516,>LE01Gene04797,>LE01Gene01666,>LE01Gene03390,	0.0710229		Biological process	nucleotide metabolic process	GO:0009117	8	1.31e-09	2.41482	49	170	680	5697	>LE01Gene13123,>LE01Gene04224,>LE01Gene01553,>LE01Gene02435,>LE01Gene12240,>LE01Gene11377,>LE01Gene11772,>LE01Gene06315,>LE01Gene05464,>LE01Gene09851,>LE01Gene13008,>LE01Gene05850,>LE01Gene04586,>LE01Gene03255,>LE01Gene01076,>LE01Gene08075,>LE01Gene01885,>LE01Gene05820,>LE01Gene14307,>LE01Gene13422,>LE01Gene10320,>LE01Gene03156,>LE01Gene08432,>LE01Gene02243,>LE01Gene03585,>LE01Gene06610,>LE01Gene…	4.76e-08
Biological process	tRNA aminoacylation for protein translation	GO:0006418	11	0.00770524	2.00925	13	38	970	5697	>LE01Gene01520,>LE01Gene10058,>LE01Gene01963,>LE01Gene04519,>LE01Gene00166,>LE01Gene03256,>LE01Gene01438,>LE01Gene01477,>LE01Gene10765,>LE01Gene08833,>LE01Gene01304,>LE01Gene08387,>LE01Gene12401,	0.0717488		Biological process	DNA-templated DNA replication	GO:0006261	9	2.47e-09	6.70235	12	15	680	5697	>LE01Gene03366,>LE01Gene10059,>LE01Gene00240,>LE01Gene08526,>LE01Gene08065,>LE01Gene10312,>LE01Gene11651,>LE01Gene02290,>LE01Gene05607,>LE01Gene00799,>LE01Gene07785,>LE01Gene10966,	8.71e-08
Biological process	organonitrogen compound biosynthetic process	GO:1901566	5	0.0078279	1.22953	112	535	970	5697	>LE01Gene05983,>LE01Gene06818,>LE01Gene10077,>LE01Gene00290,>LE01Gene06881,>LE01Gene03342,>LE01Gene10024,>LE01Gene12685,>LE01Gene01520,>LE01Gene13510,>LE01Gene01584,>LE01Gene02434,>LE01Gene01586,>LE01Gene10058,>LE01Gene10056,>LE01Gene02418,>LE01Gene02420,>LE01Gene00628,>LE01Gene13915,>LE01Gene10457,>LE01Gene10460,>LE01Gene01963,>LE01Gene06329,>LE01Gene08952,>LE01Gene05457,>LE01Gene01907,>LE01Gene…	0.0724207		Biological process	carbohydrate derivative metabolic process	GO:1901135	4	6.67e-09	2.04652	64	262	680	5697	>LE01Gene13123,>LE01Gene04224,>LE01Gene04206,>LE01Gene01553,>LE01Gene02435,>LE01Gene01107,>LE01Gene12240,>LE01Gene00230,>LE01Gene11377,>LE01Gene09065,>LE01Gene11772,>LE01Gene06315,>LE01Gene05464,>LE01Gene06313,>LE01Gene09851,>LE01Gene13008,>LE01Gene05850,>LE01Gene04586,>LE01Gene01076,>LE01Gene08075,>LE01Gene01885,>LE01Gene05820,>LE01Gene14307,>LE01Gene13422,>LE01Gene13437,>LE01Gene08458,>LE01Gene…	2.28e-07
Biological process	organophosphate catabolic process	GO:0046434	6	0.00791509	1.81535	17	55	970	5697	>LE01Gene02390,>LE01Gene11222,>LE01Gene09790,>LE01Gene07114,>LE01Gene04902,>LE01Gene14216,>LE01Gene04457,>LE01Gene03960,>LE01Gene11106,>LE01Gene10241,>LE01Gene03056,>LE01Gene06597,>LE01Gene03019,>LE01Gene04720,>LE01Gene00733,>LE01Gene08279,>LE01Gene05567,	0.0727579		Biological process	inorganic cation transmembrane transport	GO:0098662	8	8.88e-09	2.95132	31	88	680	5697	>LE01Gene13123,>LE01Gene01120,>LE01Gene12240,>LE01Gene12618,>LE01Gene09851,>LE01Gene06352,>LE01Gene13008,>LE01Gene05850,>LE01Gene04586,>LE01Gene01076,>LE01Gene08075,>LE01Gene01885,>LE01Gene14307,>LE01Gene10320,>LE01Gene08432,>LE01Gene00929,>LE01Gene03585,>LE01Gene06610,>LE01Gene05778,>LE01Gene02270,>LE01Gene01780,>LE01Gene10225,>LE01Gene03934,>LE01Gene06179,>LE01Gene10683,>LE01Gene02186,>LE01Gene…	2.94e-07
Biological process	organic hydroxy compound biosynthetic process	GO:1901617	5	0.00887921	2.47292	8	19	970	5697	>LE01Gene03342,>LE01Gene09790,>LE01Gene01873,>LE01Gene03960,>LE01Gene03019,>LE01Gene02135,>LE01Gene08279,>LE01Gene05579,	0.0811005		Biological process	lipid biosynthetic process	GO:0008610	5	1.6e-08	2.60491	37	119	680	5697	>LE01Gene04206,>LE01Gene11394,>LE01Gene02429,>LE01Gene09887,>LE01Gene11772,>LE01Gene06312,>LE01Gene06357,>LE01Gene04161,>LE01Gene05875,>LE01Gene00158,>LE01Gene00118,>LE01Gene13422,>LE01Gene13437,>LE01Gene01831,>LE01Gene07594,>LE01Gene09356,>LE01Gene09341,>LE01Gene03176,>LE01Gene01390,>LE01Gene02243,>LE01Gene00457,>LE01Gene03965,>LE01Gene09670,>LE01Gene08313,>LE01Gene08749,>LE01Gene03091,>LE01Gene…	5.18e-07
Biological process	aspartate metabolic process	GO:0006531	10	0.00975819	2.29821	9	23	970	5697	>LE01Gene01586,>LE01Gene10460,>LE01Gene04519,>LE01Gene03256,>LE01Gene12537,>LE01Gene12831,>LE01Gene12401,>LE01Gene11906,>LE01Gene06507,	0.086378		Biological process	inorganic ion transmembrane transport	GO:0098660	7	2.21e-08	2.85402	31	91	680	5697	>LE01Gene13123,>LE01Gene01120,>LE01Gene12240,>LE01Gene12618,>LE01Gene09851,>LE01Gene06352,>LE01Gene13008,>LE01Gene05850,>LE01Gene04586,>LE01Gene01076,>LE01Gene08075,>LE01Gene01885,>LE01Gene14307,>LE01Gene10320,>LE01Gene08432,>LE01Gene00929,>LE01Gene03585,>LE01Gene06610,>LE01Gene05778,>LE01Gene02270,>LE01Gene01780,>LE01Gene10225,>LE01Gene03934,>LE01Gene06179,>LE01Gene10683,>LE01Gene02186,>LE01Gene…	6.95e-07
Biological process	amino acid activation	GO:0043038	8	0.00980055	1.95773	13	39	970	5697	>LE01Gene01520,>LE01Gene10058,>LE01Gene01963,>LE01Gene04519,>LE01Gene00166,>LE01Gene03256,>LE01Gene01438,>LE01Gene01477,>LE01Gene10765,>LE01Gene08833,>LE01Gene01304,>LE01Gene08387,>LE01Gene12401,	0.0862208		Biological process	ATP biosynthetic process	GO:0006754	12	2.84e-08	3.80816	20	44	680	5697	>LE01Gene04224,>LE01Gene01553,>LE01Gene11377,>LE01Gene13008,>LE01Gene04586,>LE01Gene01885,>LE01Gene05820,>LE01Gene14307,>LE01Gene13422,>LE01Gene03585,>LE01Gene06610,>LE01Gene01780,>LE01Gene10284,>LE01Gene03934,>LE01Gene03424,>LE01Gene03007,>LE01Gene04343,>LE01Gene09140,>LE01Gene03869,>LE01Gene05183,	8.69e-07
Biological process	tRNA aminoacylation	GO:0043039	10	0.00980055	1.95773	13	39	970	5697	>LE01Gene01520,>LE01Gene10058,>LE01Gene01963,>LE01Gene04519,>LE01Gene00166,>LE01Gene03256,>LE01Gene01438,>LE01Gene01477,>LE01Gene10765,>LE01Gene08833,>LE01Gene01304,>LE01Gene08387,>LE01Gene12401,	0.0862208		Biological process	response to chemical	GO:0042221	3	3.86e-08	1.85619	74	334	680	5697	>LE01Gene13123,>LE01Gene01135,>LE01Gene04224,>LE01Gene01549,>LE01Gene01553,>LE01Gene02435,>LE01Gene12240,>LE01Gene01574,>LE01Gene11371,>LE01Gene11377,>LE01Gene07256,>LE01Gene11755,>LE01Gene00669,>LE01Gene06315,>LE01Gene06355,>LE01Gene09851,>LE01Gene13008,>LE01Gene05850,>LE01Gene04586,>LE01Gene03255,>LE01Gene01076,>LE01Gene08075,>LE01Gene01885,>LE01Gene05820,>LE01Gene14307,>LE01Gene13422,>LE01Gene…	1.15e-06
Biological process	organonitrogen compound metabolic process	GO:1901564	4	0.0109197	1.11736	277	1456	970	5697	>LE01Gene05983,>LE01Gene01150,>LE01Gene06847,>LE01Gene13132,>LE01Gene06818,>LE01Gene10077,>LE01Gene12254,>LE01Gene14441,>LE01Gene00290,>LE01Gene06881,>LE01Gene01199,>LE01Gene01197,>LE01Gene07739,>LE01Gene06854,>LE01Gene03342,>LE01Gene03348,>LE01Gene06858,>LE01Gene04205,>LE01Gene10024,>LE01Gene12685,>LE01Gene13536,>LE01Gene02852,>LE01Gene01520,>LE01Gene08162,>LE01Gene13510,>LE01Gene01584,>LE01Gene…	0.0949024		Biological process	DNA replication initiation	GO:0006270	8	3.97e-08	8.37794	8	8	680	5697	>LE01Gene03366,>LE01Gene10059,>LE01Gene08526,>LE01Gene08065,>LE01Gene11651,>LE01Gene02290,>LE01Gene05607,>LE01Gene07785,	1.15e-06
Biological process	ATP biosynthetic process	GO:0006754	12	0.011679	1.86874	14	44	970	5697	>LE01Gene02390,>LE01Gene11222,>LE01Gene09790,>LE01Gene07114,>LE01Gene04902,>LE01Gene14216,>LE01Gene03960,>LE01Gene03056,>LE01Gene06597,>LE01Gene03019,>LE01Gene04720,>LE01Gene00733,>LE01Gene08279,>LE01Gene05567,	0.100889		Biological process	nucleoside triphosphate biosynthetic process	GO:0009142	9	4.57e-08	3.59055	21	49	680	5697	>LE01Gene04224,>LE01Gene01553,>LE01Gene11377,>LE01Gene13008,>LE01Gene04586,>LE01Gene01885,>LE01Gene05820,>LE01Gene14307,>LE01Gene13422,>LE01Gene03585,>LE01Gene06610,>LE01Gene01780,>LE01Gene13331,>LE01Gene10284,>LE01Gene03934,>LE01Gene03424,>LE01Gene03007,>LE01Gene04343,>LE01Gene09140,>LE01Gene03869,>LE01Gene05183,	1.3e-06
Biological process	tryptophan biosynthetic process	GO:0000162	10	0.0133058	2.20245	9	24	970	5697	>LE01Gene06881,>LE01Gene01520,>LE01Gene01477,>LE01Gene10765,>LE01Gene07177,>LE01Gene07012,>LE01Gene12832,>LE01Gene06195,>LE01Gene04720,	0.114255		Biological process	purine nucleoside triphosphate biosynthetic process	GO:0009145	10	7.17e-08	3.64258	20	46	680	5697	>LE01Gene04224,>LE01Gene01553,>LE01Gene11377,>LE01Gene13008,>LE01Gene04586,>LE01Gene01885,>LE01Gene05820,>LE01Gene14307,>LE01Gene13422,>LE01Gene03585,>LE01Gene06610,>LE01Gene01780,>LE01Gene10284,>LE01Gene03934,>LE01Gene03424,>LE01Gene03007,>LE01Gene04343,>LE01Gene09140,>LE01Gene03869,>LE01Gene05183,	1.98e-06
Biological process	tyrosine biosynthetic process	GO:0006571	11	0.0133058	2.20245	9	24	970	5697	>LE01Gene06881,>LE01Gene01520,>LE01Gene01477,>LE01Gene10765,>LE01Gene07177,>LE01Gene07012,>LE01Gene12832,>LE01Gene06195,>LE01Gene04720,	0.114255		Biological process	purine ribonucleoside triphosphate biosynthetic process	GO:0009206	11	7.17e-08	3.64258	20	46	680	5697	>LE01Gene04224,>LE01Gene01553,>LE01Gene11377,>LE01Gene13008,>LE01Gene04586,>LE01Gene01885,>LE01Gene05820,>LE01Gene14307,>LE01Gene13422,>LE01Gene03585,>LE01Gene06610,>LE01Gene01780,>LE01Gene10284,>LE01Gene03934,>LE01Gene03424,>LE01Gene03007,>LE01Gene04343,>LE01Gene09140,>LE01Gene03869,>LE01Gene05183,	1.98e-06
Biological process	L-phenylalanine biosynthetic process	GO:0009094	11	0.0133058	2.20245	9	24	970	5697	>LE01Gene06881,>LE01Gene01520,>LE01Gene01477,>LE01Gene10765,>LE01Gene07177,>LE01Gene07012,>LE01Gene12832,>LE01Gene06195,>LE01Gene04720,	0.114255		Biological process	response to stimulus	GO:0050896	2	8.15e-08	1.52536	132	725	680	5697	>LE01Gene00298,>LE01Gene13123,>LE01Gene01135,>LE01Gene13119,>LE01Gene04224,>LE01Gene00690,>LE01Gene01549,>LE01Gene01553,>LE01Gene02435,>LE01Gene12240,>LE01Gene02413,>LE01Gene01563,>LE01Gene01574,>LE01Gene11371,>LE01Gene11377,>LE01Gene07256,>LE01Gene11755,>LE01Gene10887,>LE01Gene08138,>LE01Gene00669,>LE01Gene06315,>LE01Gene03287,>LE01Gene06355,>LE01Gene09851,>LE01Gene04172,>LE01Gene12157,>LE01Gene…	2.15e-06
Biological process	aromatic amino acid family biosynthetic process, prephenate pathway	GO:0009095	10	0.0133058	2.20245	9	24	970	5697	>LE01Gene06881,>LE01Gene01520,>LE01Gene01477,>LE01Gene10765,>LE01Gene07177,>LE01Gene07012,>LE01Gene12832,>LE01Gene06195,>LE01Gene04720,	0.114255		Biological process	phosphate-containing compound metabolic process	GO:0006796	5	9.84e-08	1.55719	121	651	680	5697	>LE01Gene06839,>LE01Gene13123,>LE01Gene05510,>LE01Gene04224,>LE01Gene01183,>LE01Gene01184,>LE01Gene00690,>LE01Gene09035,>LE01Gene01553,>LE01Gene12662,>LE01Gene02435,>LE01Gene10065,>LE01Gene12240,>LE01Gene00230,>LE01Gene11377,>LE01Gene11755,>LE01Gene08137,>LE01Gene01992,>LE01Gene00667,>LE01Gene02814,>LE01Gene11772,>LE01Gene06315,>LE01Gene05464,>LE01Gene01092,>LE01Gene06355,>LE01Gene09851,>LE01Gene…	2.54e-06
Biological process	indolalkylamine biosynthetic process	GO:0046219	9	0.0133058	2.20245	9	24	970	5697	>LE01Gene06881,>LE01Gene01520,>LE01Gene01477,>LE01Gene10765,>LE01Gene07177,>LE01Gene07012,>LE01Gene12832,>LE01Gene06195,>LE01Gene04720,	0.114255		Biological process	cation transmembrane transport	GO:0098655	7	1.21e-07	2.58385	33	107	680	5697	>LE01Gene13123,>LE01Gene01120,>LE01Gene12240,>LE01Gene12618,>LE01Gene09851,>LE01Gene06352,>LE01Gene13008,>LE01Gene05850,>LE01Gene04586,>LE01Gene01076,>LE01Gene08075,>LE01Gene01885,>LE01Gene14307,>LE01Gene10320,>LE01Gene08432,>LE01Gene00929,>LE01Gene03585,>LE01Gene06610,>LE01Gene05778,>LE01Gene02270,>LE01Gene01780,>LE01Gene10225,>LE01Gene03934,>LE01Gene06179,>LE01Gene10683,>LE01Gene02186,>LE01Gene…	3.05e-06
Biological process	indole-containing compound biosynthetic process	GO:0042435	6	0.0133058	2.20245	9	24	970	5697	>LE01Gene06881,>LE01Gene01520,>LE01Gene01477,>LE01Gene10765,>LE01Gene07177,>LE01Gene07012,>LE01Gene12832,>LE01Gene06195,>LE01Gene04720,	0.114255		Biological process	phosphorus metabolic process	GO:0006793	4	1.29e-07	1.55005	121	654	680	5697	>LE01Gene06839,>LE01Gene13123,>LE01Gene05510,>LE01Gene04224,>LE01Gene01183,>LE01Gene01184,>LE01Gene00690,>LE01Gene09035,>LE01Gene01553,>LE01Gene12662,>LE01Gene02435,>LE01Gene10065,>LE01Gene12240,>LE01Gene00230,>LE01Gene11377,>LE01Gene11755,>LE01Gene08137,>LE01Gene01992,>LE01Gene00667,>LE01Gene02814,>LE01Gene11772,>LE01Gene06315,>LE01Gene05464,>LE01Gene01092,>LE01Gene06355,>LE01Gene09851,>LE01Gene…	3.18e-06
Biological process	erythrose 4-phosphate/phosphoenolpyruvate family amino acid biosynthetic process	GO:1902223	10	0.0133058	2.20245	9	24	970	5697	>LE01Gene06881,>LE01Gene01520,>LE01Gene01477,>LE01Gene10765,>LE01Gene07177,>LE01Gene07012,>LE01Gene12832,>LE01Gene06195,>LE01Gene04720,	0.114255		Biological process	nucleobase-containing small molecule metabolic process	GO:0055086	6	1.35e-07	1.98976	57	240	680	5697	>LE01Gene06839,>LE01Gene13123,>LE01Gene04224,>LE01Gene01541,>LE01Gene01553,>LE01Gene02435,>LE01Gene12240,>LE01Gene11377,>LE01Gene08137,>LE01Gene11772,>LE01Gene06315,>LE01Gene05464,>LE01Gene07689,>LE01Gene09851,>LE01Gene13008,>LE01Gene05850,>LE01Gene08932,>LE01Gene04586,>LE01Gene03255,>LE01Gene01076,>LE01Gene08075,>LE01Gene01885,>LE01Gene05820,>LE01Gene14307,>LE01Gene13422,>LE01Gene10320,>LE01Gene…	3.26e-06
Biological process	tyrosine metabolic process	GO:0006570	9	0.0134266	1.79792	15	49	970	5697	>LE01Gene06881,>LE01Gene01520,>LE01Gene01477,>LE01Gene10765,>LE01Gene07177,>LE01Gene11650,>LE01Gene02634,>LE01Gene07012,>LE01Gene12832,>LE01Gene06195,>LE01Gene03883,>LE01Gene03875,>LE01Gene04720,>LE01Gene04726,>LE01Gene01639,	0.110654		Biological process	nucleoside monophosphate biosynthetic process	GO:0009124	9	1.56e-07	3.09339	24	65	680	5697	>LE01Gene04224,>LE01Gene01553,>LE01Gene11377,>LE01Gene06315,>LE01Gene13008,>LE01Gene04586,>LE01Gene01885,>LE01Gene05820,>LE01Gene14307,>LE01Gene13422,>LE01Gene03156,>LE01Gene03585,>LE01Gene06610,>LE01Gene01780,>LE01Gene13331,>LE01Gene10284,>LE01Gene03934,>LE01Gene00801,>LE01Gene03424,>LE01Gene03007,>LE01Gene04343,>LE01Gene09140,>LE01Gene03869,>LE01Gene05183,	3.7e-06
Biological process	amine biosynthetic process	GO:0009309	6	0.0134644	2.09757	10	28	970	5697	>LE01Gene06881,>LE01Gene01520,>LE01Gene01477,>LE01Gene10765,>LE01Gene07177,>LE01Gene07012,>LE01Gene12832,>LE01Gene06195,>LE01Gene06514,>LE01Gene04720,	0.110331		Biological process	ribonucleoside triphosphate biosynthetic process	GO:0009201	10	1.69e-07	3.49081	20	48	680	5697	>LE01Gene04224,>LE01Gene01553,>LE01Gene11377,>LE01Gene13008,>LE01Gene04586,>LE01Gene01885,>LE01Gene05820,>LE01Gene14307,>LE01Gene13422,>LE01Gene03585,>LE01Gene06610,>LE01Gene01780,>LE01Gene10284,>LE01Gene03934,>LE01Gene03424,>LE01Gene03007,>LE01Gene04343,>LE01Gene09140,>LE01Gene03869,>LE01Gene05183,	3.93e-06
Biological process	cellular biogenic amine biosynthetic process	GO:0042401	8	0.0134644	2.09757	10	28	970	5697	>LE01Gene06881,>LE01Gene01520,>LE01Gene01477,>LE01Gene10765,>LE01Gene07177,>LE01Gene07012,>LE01Gene12832,>LE01Gene06195,>LE01Gene06514,>LE01Gene04720,	0.110331		Biological process	xenobiotic metabolic process	GO:0006805	4	2.74e-07	1.87833	63	281	680	5697	>LE01Gene13123,>LE01Gene01135,>LE01Gene04224,>LE01Gene01549,>LE01Gene01553,>LE01Gene02435,>LE01Gene12240,>LE01Gene01574,>LE01Gene11377,>LE01Gene11755,>LE01Gene00669,>LE01Gene06315,>LE01Gene09851,>LE01Gene13008,>LE01Gene05850,>LE01Gene04586,>LE01Gene03255,>LE01Gene01076,>LE01Gene08075,>LE01Gene01885,>LE01Gene05820,>LE01Gene14307,>LE01Gene13422,>LE01Gene11252,>LE01Gene08443,>LE01Gene10348,>LE01Gene…	6.24e-06
Biological process	vitamin metabolic process	GO:0006766	4	0.0135256	1.62286	21	76	970	5697	>LE01Gene13132,>LE01Gene00290,>LE01Gene03342,>LE01Gene10024,>LE01Gene00628,>LE01Gene08952,>LE01Gene01907,>LE01Gene07614,>LE01Gene01423,>LE01Gene10334,>LE01Gene01873,>LE01Gene09703,>LE01Gene03960,>LE01Gene09272,>LE01Gene02192,>LE01Gene02135,>LE01Gene02988,>LE01Gene02539,>LE01Gene02540,>LE01Gene08279,>LE01Gene05579,	0.10958		Biological process	purine nucleoside monophosphate biosynthetic process	GO:0009127	10	2.98e-07	3.17784	22	58	680	5697	>LE01Gene04224,>LE01Gene01553,>LE01Gene11377,>LE01Gene06315,>LE01Gene13008,>LE01Gene04586,>LE01Gene01885,>LE01Gene05820,>LE01Gene14307,>LE01Gene13422,>LE01Gene03585,>LE01Gene06610,>LE01Gene01780,>LE01Gene10284,>LE01Gene03934,>LE01Gene00801,>LE01Gene03424,>LE01Gene03007,>LE01Gene04343,>LE01Gene09140,>LE01Gene03869,>LE01Gene05183,	6.66e-06
Biological process	water-soluble vitamin metabolic process	GO:0006767	5	0.0135256	1.62286	21	76	970	5697	>LE01Gene13132,>LE01Gene00290,>LE01Gene03342,>LE01Gene10024,>LE01Gene00628,>LE01Gene08952,>LE01Gene01907,>LE01Gene07614,>LE01Gene01423,>LE01Gene10334,>LE01Gene01873,>LE01Gene09703,>LE01Gene03960,>LE01Gene09272,>LE01Gene02192,>LE01Gene02135,>LE01Gene02988,>LE01Gene02539,>LE01Gene02540,>LE01Gene08279,>LE01Gene05579,	0.10958		Biological process	purine ribonucleoside monophosphate biosynthetic process	GO:0009168	11	2.98e-07	3.17784	22	58	680	5697	>LE01Gene04224,>LE01Gene01553,>LE01Gene11377,>LE01Gene06315,>LE01Gene13008,>LE01Gene04586,>LE01Gene01885,>LE01Gene05820,>LE01Gene14307,>LE01Gene13422,>LE01Gene03585,>LE01Gene06610,>LE01Gene01780,>LE01Gene10284,>LE01Gene03934,>LE01Gene00801,>LE01Gene03424,>LE01Gene03007,>LE01Gene04343,>LE01Gene09140,>LE01Gene03869,>LE01Gene05183,	6.66e-06
Biological process	vitamin biosynthetic process	GO:0009110	5	0.0152998	1.86223	13	41	970	5697	>LE01Gene00290,>LE01Gene03342,>LE01Gene10024,>LE01Gene08952,>LE01Gene01907,>LE01Gene01423,>LE01Gene01873,>LE01Gene09703,>LE01Gene09272,>LE01Gene02192,>LE01Gene02135,>LE01Gene02988,>LE01Gene05579,	0.12257		Biological process	response to xenobiotic stimulus	GO:0009410	4	4.58e-07	1.84257	64	291	680	5697	>LE01Gene13123,>LE01Gene01135,>LE01Gene04224,>LE01Gene01549,>LE01Gene01553,>LE01Gene02435,>LE01Gene12240,>LE01Gene01574,>LE01Gene11377,>LE01Gene11755,>LE01Gene00669,>LE01Gene06315,>LE01Gene06355,>LE01Gene09851,>LE01Gene13008,>LE01Gene05850,>LE01Gene04586,>LE01Gene03255,>LE01Gene01076,>LE01Gene08075,>LE01Gene01885,>LE01Gene05820,>LE01Gene14307,>LE01Gene13422,>LE01Gene11252,>LE01Gene08443,>LE01Gene…	9.84e-06
Biological process	water-soluble vitamin biosynthetic process	GO:0042364	6	0.0152998	1.86223	13	41	970	5697	>LE01Gene00290,>LE01Gene03342,>LE01Gene10024,>LE01Gene08952,>LE01Gene01907,>LE01Gene01423,>LE01Gene01873,>LE01Gene09703,>LE01Gene09272,>LE01Gene02192,>LE01Gene02135,>LE01Gene02988,>LE01Gene05579,	0.12257		Biological process	ribonucleoside monophosphate biosynthetic process	GO:0009156	10	5.01e-07	3.01082	23	64	680	5697	>LE01Gene04224,>LE01Gene01553,>LE01Gene11377,>LE01Gene06315,>LE01Gene13008,>LE01Gene04586,>LE01Gene01885,>LE01Gene05820,>LE01Gene14307,>LE01Gene13422,>LE01Gene03156,>LE01Gene03585,>LE01Gene06610,>LE01Gene01780,>LE01Gene10284,>LE01Gene03934,>LE01Gene00801,>LE01Gene03424,>LE01Gene03007,>LE01Gene04343,>LE01Gene09140,>LE01Gene03869,>LE01Gene05183,	1.06e-05
Biological process	antibiotic metabolic process	GO:0016999	3	0.0164822	1.69228	17	59	970	5697	>LE01Gene02418,>LE01Gene09060,>LE01Gene01966,>LE01Gene05481,>LE01Gene08997,>LE01Gene09790,>LE01Gene07108,>LE01Gene03960,>LE01Gene00476,>LE01Gene05292,>LE01Gene03019,>LE01Gene02142,>LE01Gene12309,>LE01Gene03875,>LE01Gene11424,>LE01Gene06090,>LE01Gene04245,	0.130583		Biological process	cellular response to stimulus	GO:0051716	3	5.06e-07	1.52682	117	642	680	5697	>LE01Gene00298,>LE01Gene13123,>LE01Gene01135,>LE01Gene13119,>LE01Gene04224,>LE01Gene00690,>LE01Gene01549,>LE01Gene01553,>LE01Gene02435,>LE01Gene12240,>LE01Gene02413,>LE01Gene01563,>LE01Gene01574,>LE01Gene11377,>LE01Gene11755,>LE01Gene10887,>LE01Gene08138,>LE01Gene00669,>LE01Gene06315,>LE01Gene03287,>LE01Gene09851,>LE01Gene04172,>LE01Gene12157,>LE01Gene13008,>LE01Gene05877,>LE01Gene11291,>LE01Gene…	1.05e-05
Biological process	antibiotic catabolic process	GO:0017001	5	0.0168238	2.9366	5	10	970	5697	>LE01Gene09060,>LE01Gene08997,>LE01Gene03960,>LE01Gene00476,>LE01Gene04245,	0.132557		Biological process	cellular response to xenobiotic stimulus	GO:0071466	5	5.34e-07	1.84549	63	286	680	5697	>LE01Gene13123,>LE01Gene01135,>LE01Gene04224,>LE01Gene01549,>LE01Gene01553,>LE01Gene02435,>LE01Gene12240,>LE01Gene01574,>LE01Gene11377,>LE01Gene11755,>LE01Gene00669,>LE01Gene06315,>LE01Gene09851,>LE01Gene13008,>LE01Gene05850,>LE01Gene04586,>LE01Gene03255,>LE01Gene01076,>LE01Gene08075,>LE01Gene01885,>LE01Gene05820,>LE01Gene14307,>LE01Gene13422,>LE01Gene11252,>LE01Gene08443,>LE01Gene10348,>LE01Gene…	1.09e-05
Biological process	anion transmembrane transport	GO:0098656	7	0.0169348	1.95773	11	33	970	5697	>LE01Gene12209,>LE01Gene09063,>LE01Gene08151,>LE01Gene03637,>LE01Gene07118,>LE01Gene04028,>LE01Gene07949,>LE01Gene06516,>LE01Gene04797,>LE01Gene01666,>LE01Gene03390,	0.132703		Biological process	cellular response to chemical stimulus	GO:0070887	4	9.84e-07	1.80535	64	297	680	5697	>LE01Gene13123,>LE01Gene01135,>LE01Gene04224,>LE01Gene01549,>LE01Gene01553,>LE01Gene02435,>LE01Gene12240,>LE01Gene01574,>LE01Gene11377,>LE01Gene11755,>LE01Gene00669,>LE01Gene06315,>LE01Gene09851,>LE01Gene13008,>LE01Gene05850,>LE01Gene04586,>LE01Gene03255,>LE01Gene01076,>LE01Gene08075,>LE01Gene01885,>LE01Gene05820,>LE01Gene14307,>LE01Gene13422,>LE01Gene11252,>LE01Gene08443,>LE01Gene10348,>LE01Gene…	1.97e-05
Biological process	carboxylic acid transmembrane transport	GO:1905039	8	0.0174957	2.02524	10	29	970	5697	>LE01Gene12209,>LE01Gene08151,>LE01Gene03637,>LE01Gene07118,>LE01Gene04028,>LE01Gene07949,>LE01Gene06516,>LE01Gene04797,>LE01Gene01666,>LE01Gene03390,	0.132046		Biological process	purine ribonucleotide biosynthetic process	GO:0009152	11	1.56e-06	2.92563	22	63	680	5697	>LE01Gene04224,>LE01Gene01553,>LE01Gene11377,>LE01Gene06315,>LE01Gene13008,>LE01Gene04586,>LE01Gene01885,>LE01Gene05820,>LE01Gene14307,>LE01Gene13422,>LE01Gene03585,>LE01Gene06610,>LE01Gene01780,>LE01Gene10284,>LE01Gene03934,>LE01Gene00801,>LE01Gene03424,>LE01Gene03007,>LE01Gene04343,>LE01Gene09140,>LE01Gene03869,>LE01Gene05183,	3.07e-05
Biological process	organic acid transmembrane transport	GO:1903825	7	0.0174957	2.02524	10	29	970	5697	>LE01Gene12209,>LE01Gene08151,>LE01Gene03637,>LE01Gene07118,>LE01Gene04028,>LE01Gene07949,>LE01Gene06516,>LE01Gene04797,>LE01Gene01666,>LE01Gene03390,	0.132046		Biological process	DNA conformation change	GO:0071103	7	1.63e-06	3.62289	16	37	680	5697	>LE01Gene03366,>LE01Gene05520,>LE01Gene10059,>LE01Gene05096,>LE01Gene08526,>LE01Gene12144,>LE01Gene08065,>LE01Gene00959,>LE01Gene11651,>LE01Gene00925,>LE01Gene02290,>LE01Gene13321,>LE01Gene13783,>LE01Gene13301,>LE01Gene03927,>LE01Gene05105,	3.15e-05
Biological process	organic acid transport	GO:0015849	6	0.0174957	2.02524	10	29	970	5697	>LE01Gene12209,>LE01Gene08151,>LE01Gene03637,>LE01Gene07118,>LE01Gene04028,>LE01Gene07949,>LE01Gene06516,>LE01Gene04797,>LE01Gene01666,>LE01Gene03390,	0.132046		Biological process	ion transmembrane transport	GO:0034220	6	2.27e-06	2.18298	37	142	680	5697	>LE01Gene13123,>LE01Gene01120,>LE01Gene12240,>LE01Gene13912,>LE01Gene08155,>LE01Gene07276,>LE01Gene12618,>LE01Gene09851,>LE01Gene06352,>LE01Gene13008,>LE01Gene05850,>LE01Gene04586,>LE01Gene01076,>LE01Gene08075,>LE01Gene01885,>LE01Gene14307,>LE01Gene10320,>LE01Gene03144,>LE01Gene08432,>LE01Gene00929,>LE01Gene03585,>LE01Gene06610,>LE01Gene05778,>LE01Gene02270,>LE01Gene01780,>LE01Gene10225,>LE01Gene…	4.32e-05
Biological process	carboxylic acid transport	GO:0046942	8	0.0174957	2.02524	10	29	970	5697	>LE01Gene12209,>LE01Gene08151,>LE01Gene03637,>LE01Gene07118,>LE01Gene04028,>LE01Gene07949,>LE01Gene06516,>LE01Gene04797,>LE01Gene01666,>LE01Gene03390,	0.132046		Biological process	cellular component biogenesis	GO:0044085	4	3.2e-06	1.8064	58	269	680	5697	>LE01Gene03323,>LE01Gene05993,>LE01Gene14438,>LE01Gene03363,>LE01Gene05520,>LE01Gene13145,>LE01Gene13539,>LE01Gene13506,>LE01Gene00242,>LE01Gene13552,>LE01Gene13554,>LE01Gene09893,>LE01Gene01960,>LE01Gene10826,>LE01Gene09867,>LE01Gene05499,>LE01Gene12144,>LE01Gene01045,>LE01Gene05411,>LE01Gene08921,>LE01Gene13881,>LE01Gene01434,>LE01Gene01435,>LE01Gene11238,>LE01Gene00147,>LE01Gene10309,>LE01Gene…	6e-05
Biological process	neurotransmitter metabolic process	GO:0042133	5	0.0175165	1.78749	14	46	970	5697	>LE01Gene00628,>LE01Gene07630,>LE01Gene07632,>LE01Gene10868,>LE01Gene02397,>LE01Gene12537,>LE01Gene03960,>LE01Gene08387,>LE01Gene06989,>LE01Gene03841,>LE01Gene06092,>LE01Gene08279,>LE01Gene11894,>LE01Gene04299,	0.129478		Biological process	biosynthetic process	GO:0009058	3	3.66e-06	1.32175	192	1217	680	5697	>LE01Gene03323,>LE01Gene06839,>LE01Gene13123,>LE01Gene05510,>LE01Gene02458,>LE01Gene14438,>LE01Gene03366,>LE01Gene03363,>LE01Gene04224,>LE01Gene03347,>LE01Gene03345,>LE01Gene06866,>LE01Gene04206,>LE01Gene02875,>LE01Gene13527,>LE01Gene01553,>LE01Gene08161,>LE01Gene10059,>LE01Gene01107,>LE01Gene11394,>LE01Gene00240,>LE01Gene00242,>LE01Gene02429,>LE01Gene11377,>LE01Gene09887,>LE01Gene00662,>LE01Gene…	6.75e-05
Biological process	regulation of neurotransmitter levels	GO:0001505	4	0.0175165	1.78749	14	46	970	5697	>LE01Gene00628,>LE01Gene07630,>LE01Gene07632,>LE01Gene10868,>LE01Gene02397,>LE01Gene12537,>LE01Gene03960,>LE01Gene08387,>LE01Gene06989,>LE01Gene03841,>LE01Gene06092,>LE01Gene08279,>LE01Gene11894,>LE01Gene04299,	0.129478		Biological process	purine nucleotide biosynthetic process	GO:0006164	10	3.8e-06	2.79265	22	66	680	5697	>LE01Gene04224,>LE01Gene01553,>LE01Gene11377,>LE01Gene06315,>LE01Gene13008,>LE01Gene04586,>LE01Gene01885,>LE01Gene05820,>LE01Gene14307,>LE01Gene13422,>LE01Gene03585,>LE01Gene06610,>LE01Gene01780,>LE01Gene10284,>LE01Gene03934,>LE01Gene00801,>LE01Gene03424,>LE01Gene03007,>LE01Gene04343,>LE01Gene09140,>LE01Gene03869,>LE01Gene05183,	6.88e-05
Biological process	generation of precursor metabolites and energy	GO:0006091	4	0.0182368	1.44499	31	126	970	5697	>LE01Gene00256,>LE01Gene06393,>LE01Gene05481,>LE01Gene02390,>LE01Gene11222,>LE01Gene09790,>LE01Gene07108,>LE01Gene07114,>LE01Gene04902,>LE01Gene02725,>LE01Gene14216,>LE01Gene03960,>LE01Gene11106,>LE01Gene02623,>LE01Gene02678,>LE01Gene10632,>LE01Gene05292,>LE01Gene03058,>LE01Gene03056,>LE01Gene06597,>LE01Gene03019,>LE01Gene02144,>LE01Gene04720,>LE01Gene00733,>LE01Gene10999,>LE01Gene01623,>LE01Gene…	0.133426		Biological process	organonitrogen compound metabolic process	GO:1901564	4	6.09e-06	1.27741	222	1456	680	5697	>LE01Gene03323,>LE01Gene06839,>LE01Gene13123,>LE01Gene05510,>LE01Gene14438,>LE01Gene03363,>LE01Gene02037,>LE01Gene04224,>LE01Gene03347,>LE01Gene02019,>LE01Gene04206,>LE01Gene14484,>LE01Gene01183,>LE01Gene01184,>LE01Gene01541,>LE01Gene09035,>LE01Gene01553,>LE01Gene01523,>LE01Gene12662,>LE01Gene02435,>LE01Gene01107,>LE01Gene10065,>LE01Gene12240,>LE01Gene00230,>LE01Gene00242,>LE01Gene11377,>LE01Gene…	0.000109
Biological process	carbohydrate catabolic process	GO:0016052	5	0.0189572	1.55675	22	83	970	5697	>LE01Gene12203,>LE01Gene02390,>LE01Gene11222,>LE01Gene01448,>LE01Gene09790,>LE01Gene07114,>LE01Gene04902,>LE01Gene14216,>LE01Gene03960,>LE01Gene02639,>LE01Gene13789,>LE01Gene03056,>LE01Gene06597,>LE01Gene06122,>LE01Gene03019,>LE01Gene00332,>LE01Gene04720,>LE01Gene00733,>LE01Gene08279,>LE01Gene11400,>LE01Gene05567,>LE01Gene04299,	0.133915		Biological process	cation transport	GO:0006812	6	6.44e-06	2.17443	34	131	680	5697	>LE01Gene13123,>LE01Gene01120,>LE01Gene12240,>LE01Gene09893,>LE01Gene12618,>LE01Gene09851,>LE01Gene06352,>LE01Gene13008,>LE01Gene05850,>LE01Gene04586,>LE01Gene01076,>LE01Gene08075,>LE01Gene01885,>LE01Gene14307,>LE01Gene10320,>LE01Gene08432,>LE01Gene00929,>LE01Gene03585,>LE01Gene06610,>LE01Gene05778,>LE01Gene02270,>LE01Gene01780,>LE01Gene10225,>LE01Gene03934,>LE01Gene06179,>LE01Gene10683,>LE01Gene…	0.000113
Biological process	translational elongation	GO:0006414	7	0.0234046	2.13571	8	22	970	5697	>LE01Gene12685,>LE01Gene06351,>LE01Gene04537,>LE01Gene06725,>LE01Gene03252,>LE01Gene07174,>LE01Gene05679,>LE01Gene10513,	0.164521		Biological process	purine-containing compound biosynthetic process	GO:0072522	6	6.61e-06	2.71051	22	68	680	5697	>LE01Gene04224,>LE01Gene01553,>LE01Gene11377,>LE01Gene06315,>LE01Gene13008,>LE01Gene04586,>LE01Gene01885,>LE01Gene05820,>LE01Gene14307,>LE01Gene13422,>LE01Gene03585,>LE01Gene06610,>LE01Gene01780,>LE01Gene10284,>LE01Gene03934,>LE01Gene00801,>LE01Gene03424,>LE01Gene03007,>LE01Gene04343,>LE01Gene09140,>LE01Gene03869,>LE01Gene05183,	0.000115
Biological process	carbohydrate transport	GO:0008643	6	0.0234046	2.13571	8	22	970	5697	>LE01Gene11335,>LE01Gene01084,>LE01Gene08410,>LE01Gene07973,>LE01Gene05620,>LE01Gene09159,>LE01Gene09158,>LE01Gene08252,	0.164521		Biological process	ribonucleotide biosynthetic process	GO:0009260	10	6.61e-06	2.71051	22	68	680	5697	>LE01Gene04224,>LE01Gene01553,>LE01Gene11377,>LE01Gene06315,>LE01Gene13008,>LE01Gene04586,>LE01Gene01885,>LE01Gene05820,>LE01Gene14307,>LE01Gene13422,>LE01Gene03585,>LE01Gene06610,>LE01Gene01780,>LE01Gene10284,>LE01Gene03934,>LE01Gene00801,>LE01Gene03424,>LE01Gene03007,>LE01Gene04343,>LE01Gene09140,>LE01Gene03869,>LE01Gene05183,	0.000115
Biological process	hydrocarbon catabolic process	GO:0120253	5	0.026592	2.66963	5	11	970	5697	>LE01Gene03960,>LE01Gene02634,>LE01Gene02142,>LE01Gene03875,>LE01Gene08279,	0.185111		Biological process	ribose phosphate biosynthetic process	GO:0046390	7	6.61e-06	2.71051	22	68	680	5697	>LE01Gene04224,>LE01Gene01553,>LE01Gene11377,>LE01Gene06315,>LE01Gene13008,>LE01Gene04586,>LE01Gene01885,>LE01Gene05820,>LE01Gene14307,>LE01Gene13422,>LE01Gene03585,>LE01Gene06610,>LE01Gene01780,>LE01Gene10284,>LE01Gene03934,>LE01Gene00801,>LE01Gene03424,>LE01Gene03007,>LE01Gene04343,>LE01Gene09140,>LE01Gene03869,>LE01Gene05183,	0.000115
Biological process	carbohydrate biosynthetic process	GO:0016051	5	0.0274839	1.66223	15	53	970	5697	>LE01Gene02390,>LE01Gene11222,>LE01Gene13404,>LE01Gene09790,>LE01Gene07114,>LE01Gene04902,>LE01Gene14216,>LE01Gene03960,>LE01Gene03056,>LE01Gene06597,>LE01Gene03019,>LE01Gene04720,>LE01Gene00733,>LE01Gene08279,>LE01Gene05567,	0.190396		Biological process	organonitrogen compound biosynthetic process	GO:1901566	5	7.17e-06	1.51899	97	535	680	5697	>LE01Gene03323,>LE01Gene14438,>LE01Gene03363,>LE01Gene04224,>LE01Gene03347,>LE01Gene04206,>LE01Gene01553,>LE01Gene01107,>LE01Gene00242,>LE01Gene11377,>LE01Gene00662,>LE01Gene00669,>LE01Gene01960,>LE01Gene11776,>LE01Gene06315,>LE01Gene06313,>LE01Gene05475,>LE01Gene09867,>LE01Gene05499,>LE01Gene13008,>LE01Gene05875,>LE01Gene01014,>LE01Gene04586,>LE01Gene03255,>LE01Gene05411,>LE01Gene08921,>LE01Gene…	0.000119
Biological process	metabolic process	GO:0008152	2	0.0288346	1.02711	809	4626	970	5697	>LE01Gene04653,>LE01Gene04657,>LE01Gene03325,>LE01Gene05983,>LE01Gene04654,>LE01Gene05507,>LE01Gene14458,>LE01Gene13129,>LE01Gene14459,>LE01Gene01150,>LE01Gene06846,>LE01Gene01156,>LE01Gene06847,>LE01Gene05516,>LE01Gene05518,>LE01Gene13132,>LE01Gene13135,>LE01Gene01161,>LE01Gene02451,>LE01Gene02456,>LE01Gene03303,>LE01Gene03302,>LE01Gene06818,>LE01Gene10077,>LE01Gene12251,>LE01Gene12252,>LE01Gene…	0.198792		Biological process	carbohydrate derivative biosynthetic process	GO:1901137	5	8.57e-06	2.17695	33	127	680	5697	>LE01Gene04224,>LE01Gene01553,>LE01Gene01107,>LE01Gene11377,>LE01Gene06315,>LE01Gene06313,>LE01Gene13008,>LE01Gene04586,>LE01Gene01885,>LE01Gene05820,>LE01Gene14307,>LE01Gene13422,>LE01Gene13437,>LE01Gene08458,>LE01Gene01850,>LE01Gene09341,>LE01Gene03585,>LE01Gene06610,>LE01Gene00093,>LE01Gene01780,>LE01Gene00457,>LE01Gene13331,>LE01Gene10284,>LE01Gene03934,>LE01Gene00801,>LE01Gene03424,>LE01Gene…	0.00014
Biological process	purine-containing compound metabolic process	GO:0072521	5	0.0297242	1.34447	38	166	970	5697	>LE01Gene05983,>LE01Gene13132,>LE01Gene06818,>LE01Gene02434,>LE01Gene01586,>LE01Gene02836,>LE01Gene10460,>LE01Gene04567,>LE01Gene08929,>LE01Gene02390,>LE01Gene11222,>LE01Gene09790,>LE01Gene00950,>LE01Gene07114,>LE01Gene10334,>LE01Gene07172,>LE01Gene04902,>LE01Gene09327,>LE01Gene05330,>LE01Gene04059,>LE01Gene02230,>LE01Gene14216,>LE01Gene07910,>LE01Gene03960,>LE01Gene00453,>LE01Gene10241,>LE01Gene…	0.17985		Biological process	ion transport	GO:0006811	5	8.81e-06	1.96577	42	179	680	5697	>LE01Gene13123,>LE01Gene01120,>LE01Gene12240,>LE01Gene09893,>LE01Gene13912,>LE01Gene08155,>LE01Gene07276,>LE01Gene12618,>LE01Gene09851,>LE01Gene06352,>LE01Gene13008,>LE01Gene05850,>LE01Gene04586,>LE01Gene01076,>LE01Gene08075,>LE01Gene01885,>LE01Gene14307,>LE01Gene10320,>LE01Gene03144,>LE01Gene08432,>LE01Gene00929,>LE01Gene03585,>LE01Gene00078,>LE01Gene06610,>LE01Gene12056,>LE01Gene05778,>LE01Gene…	0.000142
Biological process	secondary metabolic process	GO:0019748	3	0.0299974	2.34928	6	15	970	5697	>LE01Gene02418,>LE01Gene09060,>LE01Gene08997,>LE01Gene01744,>LE01Gene02142,>LE01Gene03883,	0.180741		Biological process	organic substance biosynthetic process	GO:1901576	4	9.75e-06	1.31238	185	1181	680	5697	>LE01Gene03323,>LE01Gene06839,>LE01Gene13123,>LE01Gene05510,>LE01Gene02458,>LE01Gene14438,>LE01Gene03366,>LE01Gene03363,>LE01Gene04224,>LE01Gene03347,>LE01Gene03345,>LE01Gene04206,>LE01Gene13527,>LE01Gene01553,>LE01Gene08161,>LE01Gene10059,>LE01Gene01107,>LE01Gene11394,>LE01Gene00240,>LE01Gene00242,>LE01Gene02429,>LE01Gene11377,>LE01Gene09887,>LE01Gene00662,>LE01Gene01992,>LE01Gene00669,>LE01Gene…	0.000155
Biological process	purine nucleotide metabolic process	GO:0006163	9	0.0302496	1.42862	27	111	970	5697	>LE01Gene05983,>LE01Gene06818,>LE01Gene02434,>LE01Gene01586,>LE01Gene10460,>LE01Gene02390,>LE01Gene11222,>LE01Gene09790,>LE01Gene00950,>LE01Gene07114,>LE01Gene07172,>LE01Gene04902,>LE01Gene09327,>LE01Gene05330,>LE01Gene14216,>LE01Gene07910,>LE01Gene03960,>LE01Gene00453,>LE01Gene03056,>LE01Gene06597,>LE01Gene03019,>LE01Gene06507,>LE01Gene04720,>LE01Gene04726,>LE01Gene00733,>LE01Gene08279,>LE01Gene…	0.181498		Biological process	ribosome biogenesis	GO:0042254	6	2.76e-05	1.95314	38	163	680	5697	>LE01Gene03323,>LE01Gene14438,>LE01Gene03363,>LE01Gene13145,>LE01Gene00242,>LE01Gene01960,>LE01Gene09867,>LE01Gene05499,>LE01Gene01045,>LE01Gene05411,>LE01Gene08921,>LE01Gene13881,>LE01Gene11238,>LE01Gene00147,>LE01Gene10309,>LE01Gene00960,>LE01Gene02727,>LE01Gene02296,>LE01Gene00911,>LE01Gene08401,>LE01Gene03586,>LE01Gene00461,>LE01Gene13327,>LE01Gene12459,>LE01Gene11500,>LE01Gene00865,>LE01Gene…	0.000433
Biological process	carboxylic acid catabolic process	GO:0046395	7	0.0341147	1.59273	16	59	970	5697	>LE01Gene04619,>LE01Gene09080,>LE01Gene02397,>LE01Gene01407,>LE01Gene03960,>LE01Gene02634,>LE01Gene05216,>LE01Gene02192,>LE01Gene05620,>LE01Gene06992,>LE01Gene03883,>LE01Gene02539,>LE01Gene02540,>LE01Gene06090,>LE01Gene06091,>LE01Gene08279,	0.200494		Biological process	mitochondrial electron transport, cytochrome c to oxygen	GO:0006123	9	2.91e-05	5.86456	7	10	680	5697	>LE01Gene12240,>LE01Gene01076,>LE01Gene10320,>LE01Gene06179,>LE01Gene13274,>LE01Gene08280,>LE01Gene04234,	0.00045
Biological process	organic acid catabolic process	GO:0016054	5	0.0341147	1.59273	16	59	970	5697	>LE01Gene04619,>LE01Gene09080,>LE01Gene02397,>LE01Gene01407,>LE01Gene03960,>LE01Gene02634,>LE01Gene05216,>LE01Gene02192,>LE01Gene05620,>LE01Gene06992,>LE01Gene03883,>LE01Gene02539,>LE01Gene02540,>LE01Gene06090,>LE01Gene06091,>LE01Gene08279,	0.200494		Biological process	nucleoside phosphate biosynthetic process	GO:1901293	8	3.16e-05	2.32721	25	90	680	5697	>LE01Gene04224,>LE01Gene01553,>LE01Gene11377,>LE01Gene06315,>LE01Gene13008,>LE01Gene04586,>LE01Gene01885,>LE01Gene05820,>LE01Gene14307,>LE01Gene13422,>LE01Gene03156,>LE01Gene02243,>LE01Gene03585,>LE01Gene06610,>LE01Gene01780,>LE01Gene13331,>LE01Gene10284,>LE01Gene03934,>LE01Gene00801,>LE01Gene03424,>LE01Gene03007,>LE01Gene04343,>LE01Gene09140,>LE01Gene03869,>LE01Gene05183,	0.000483
Biological process	proline metabolic process	GO:0006560	10	0.0348547	1.83537	10	32	970	5697	>LE01Gene01199,>LE01Gene06329,>LE01Gene02397,>LE01Gene03960,>LE01Gene01304,>LE01Gene11906,>LE01Gene06514,>LE01Gene06992,>LE01Gene06092,>LE01Gene08279,	0.203178		Biological process	nucleotide biosynthetic process	GO:0009165	9	3.16e-05	2.32721	25	90	680	5697	>LE01Gene04224,>LE01Gene01553,>LE01Gene11377,>LE01Gene06315,>LE01Gene13008,>LE01Gene04586,>LE01Gene01885,>LE01Gene05820,>LE01Gene14307,>LE01Gene13422,>LE01Gene03156,>LE01Gene02243,>LE01Gene03585,>LE01Gene06610,>LE01Gene01780,>LE01Gene13331,>LE01Gene10284,>LE01Gene03934,>LE01Gene00801,>LE01Gene03424,>LE01Gene03007,>LE01Gene04343,>LE01Gene09140,>LE01Gene03869,>LE01Gene05183,	0.000483
Biological process	cellular modified amino acid metabolic process	GO:0006575	5	0.0354991	1.64449	14	50	970	5697	>LE01Gene13915,>LE01Gene10823,>LE01Gene08952,>LE01Gene01907,>LE01Gene01423,>LE01Gene09703,>LE01Gene09272,>LE01Gene10637,>LE01Gene03045,>LE01Gene02192,>LE01Gene02988,>LE01Gene02907,>LE01Gene06030,>LE01Gene01623,	0.206096		Biological process	lipid metabolic process	GO:0006629	4	4.14e-05	1.7454	50	240	680	5697	>LE01Gene04206,>LE01Gene00690,>LE01Gene11394,>LE01Gene00230,>LE01Gene02429,>LE01Gene09887,>LE01Gene11772,>LE01Gene06312,>LE01Gene06357,>LE01Gene04161,>LE01Gene05875,>LE01Gene00158,>LE01Gene03658,>LE01Gene00118,>LE01Gene13422,>LE01Gene13437,>LE01Gene01831,>LE01Gene00953,>LE01Gene07594,>LE01Gene09356,>LE01Gene09333,>LE01Gene09341,>LE01Gene08856,>LE01Gene03176,>LE01Gene01390,>LE01Gene02243,>LE01Gene…	0.000616
Biological process	cellular amino acid catabolic process	GO:0009063	8	0.0376468	1.60178	15	55	970	5697	>LE01Gene04619,>LE01Gene09080,>LE01Gene02397,>LE01Gene01407,>LE01Gene03960,>LE01Gene02634,>LE01Gene05216,>LE01Gene02192,>LE01Gene06992,>LE01Gene03883,>LE01Gene02539,>LE01Gene02540,>LE01Gene06090,>LE01Gene06091,>LE01Gene08279,	0.213382		Biological process	small molecule metabolic process	GO:0044281	3	5.58e-05	1.3811	121	734	680	5697	>LE01Gene06839,>LE01Gene13123,>LE01Gene05510,>LE01Gene01135,>LE01Gene04224,>LE01Gene03347,>LE01Gene06865,>LE01Gene04206,>LE01Gene01541,>LE01Gene01549,>LE01Gene01553,>LE01Gene02435,>LE01Gene12240,>LE01Gene01574,>LE01Gene02429,>LE01Gene11377,>LE01Gene11755,>LE01Gene09887,>LE01Gene08137,>LE01Gene01992,>LE01Gene00667,>LE01Gene00669,>LE01Gene02814,>LE01Gene11772,>LE01Gene11776,>LE01Gene06315,>LE01Gene…	0.00082
Biological process	organic anion transport	GO:0015711	7	0.0392423	1.74609	11	37	970	5697	>LE01Gene12209,>LE01Gene09063,>LE01Gene08151,>LE01Gene03637,>LE01Gene07118,>LE01Gene04028,>LE01Gene07949,>LE01Gene06516,>LE01Gene04797,>LE01Gene01666,>LE01Gene03390,	0.221549		Biological process	steroid biosynthetic process	GO:0006694	6	5.65e-05	3.9895	10	21	680	5697	>LE01Gene11394,>LE01Gene11772,>LE01Gene04161,>LE01Gene00118,>LE01Gene13422,>LE01Gene07594,>LE01Gene05248,>LE01Gene04343,>LE01Gene09550,>LE01Gene04255,	0.00082
Biological process	purine nucleoside monophosphate metabolic process	GO:0009126	9	0.0406089	1.43706	23	94	970	5697	>LE01Gene05983,>LE01Gene06818,>LE01Gene01586,>LE01Gene02390,>LE01Gene11222,>LE01Gene09790,>LE01Gene00950,>LE01Gene07114,>LE01Gene07172,>LE01Gene04902,>LE01Gene14216,>LE01Gene07910,>LE01Gene03960,>LE01Gene00453,>LE01Gene03056,>LE01Gene06597,>LE01Gene03019,>LE01Gene06507,>LE01Gene04720,>LE01Gene04726,>LE01Gene00733,>LE01Gene08279,>LE01Gene05567,	0.228366		Biological process	cell division	GO:0051301	3	5.93e-05	3.68629	11	25	680	5697	>LE01Gene03366,>LE01Gene01018,>LE01Gene01831,>LE01Gene00934,>LE01Gene02290,>LE01Gene11519,>LE01Gene03067,>LE01Gene05607,>LE01Gene14559,>LE01Gene09135,>LE01Gene10960,	0.00085
Biological process	purine ribonucleoside monophosphate metabolic process	GO:0009167	10	0.0406089	1.43706	23	94	970	5697	>LE01Gene05983,>LE01Gene06818,>LE01Gene01586,>LE01Gene02390,>LE01Gene11222,>LE01Gene09790,>LE01Gene00950,>LE01Gene07114,>LE01Gene07172,>LE01Gene04902,>LE01Gene14216,>LE01Gene07910,>LE01Gene03960,>LE01Gene00453,>LE01Gene03056,>LE01Gene06597,>LE01Gene03019,>LE01Gene06507,>LE01Gene04720,>LE01Gene04726,>LE01Gene00733,>LE01Gene08279,>LE01Gene05567,	0.228366		Biological process	ubiquinone metabolic process	GO:0006743	6	6.15e-05	4.78739	8	14	680	5697	>LE01Gene13123,>LE01Gene11700,>LE01Gene09851,>LE01Gene08432,>LE01Gene05778,>LE01Gene10683,>LE01Gene02186,>LE01Gene10911,	0.00087
Biological process	amino sugar metabolic process	GO:0006040	5	0.042874	1.67806	12	42	970	5697	>LE01Gene07656,>LE01Gene04192,>LE01Gene06745,>LE01Gene10788,>LE01Gene07124,>LE01Gene11646,>LE01Gene00047,>LE01Gene10240,>LE01Gene00015,>LE01Gene05686,>LE01Gene03019,>LE01Gene05597,	0.239227		Biological process	ubiquinone biosynthetic process	GO:0006744	7	6.15e-05	4.78739	8	14	680	5697	>LE01Gene13123,>LE01Gene11700,>LE01Gene09851,>LE01Gene08432,>LE01Gene05778,>LE01Gene10683,>LE01Gene02186,>LE01Gene10911,	0.00087
Biological process	ribonucleoside monophosphate metabolic process	GO:0009161	9	0.0454866	1.40957	24	100	970	5697	>LE01Gene05983,>LE01Gene06818,>LE01Gene01586,>LE01Gene01078,>LE01Gene02390,>LE01Gene11222,>LE01Gene09790,>LE01Gene00950,>LE01Gene07114,>LE01Gene07172,>LE01Gene04902,>LE01Gene14216,>LE01Gene07910,>LE01Gene03960,>LE01Gene00453,>LE01Gene03056,>LE01Gene06597,>LE01Gene03019,>LE01Gene06507,>LE01Gene04720,>LE01Gene04726,>LE01Gene00733,>LE01Gene08279,>LE01Gene05567,	0.252821		Biological process	quinone metabolic process	GO:1901661	5	6.15e-05	4.78739	8	14	680	5697	>LE01Gene13123,>LE01Gene11700,>LE01Gene09851,>LE01Gene08432,>LE01Gene05778,>LE01Gene10683,>LE01Gene02186,>LE01Gene10911,	0.00087
													Biological process	quinone biosynthetic process	GO:1901663	6	6.15e-05	4.78739	8	14	680	5697	>LE01Gene13123,>LE01Gene11700,>LE01Gene09851,>LE01Gene08432,>LE01Gene05778,>LE01Gene10683,>LE01Gene02186,>LE01Gene10911,	0.00087
													Biological process	ketone biosynthetic process	GO:0042181	5	6.15e-05	4.78739	8	14	680	5697	>LE01Gene13123,>LE01Gene11700,>LE01Gene09851,>LE01Gene08432,>LE01Gene05778,>LE01Gene10683,>LE01Gene02186,>LE01Gene10911,	0.00087
													Biological process	DNA geometric change	GO:0032392	8	6.15e-05	4.78739	8	14	680	5697	>LE01Gene03366,>LE01Gene10059,>LE01Gene08526,>LE01Gene08065,>LE01Gene00959,>LE01Gene11651,>LE01Gene00925,>LE01Gene02290,	0.00087
													Biological process	DNA duplex unwinding	GO:0032508	9	6.15e-05	4.78739	8	14	680	5697	>LE01Gene03366,>LE01Gene10059,>LE01Gene08526,>LE01Gene08065,>LE01Gene00959,>LE01Gene11651,>LE01Gene00925,>LE01Gene02290,	0.00087
													Biological process	cellular lipid metabolic process	GO:0044255	5	8.44e-05	1.86176	38	171	680	5697	>LE01Gene04206,>LE01Gene00690,>LE01Gene00230,>LE01Gene02429,>LE01Gene09887,>LE01Gene11772,>LE01Gene06312,>LE01Gene06357,>LE01Gene05875,>LE01Gene00158,>LE01Gene03658,>LE01Gene00118,>LE01Gene13422,>LE01Gene13437,>LE01Gene01831,>LE01Gene09333,>LE01Gene09341,>LE01Gene03176,>LE01Gene01390,>LE01Gene02243,>LE01Gene00093,>LE01Gene00457,>LE01Gene09670,>LE01Gene08313,>LE01Gene08749,>LE01Gene07878,>LE01Gene…	0.00110148
													Biological process	phosphorylation	GO:0016310	6	8.52e-05	1.50571	78	434	680	5697	>LE01Gene13123,>LE01Gene04224,>LE01Gene01183,>LE01Gene01184,>LE01Gene09035,>LE01Gene01553,>LE01Gene12662,>LE01Gene02435,>LE01Gene10065,>LE01Gene12240,>LE01Gene11377,>LE01Gene02814,>LE01Gene06315,>LE01Gene01092,>LE01Gene06355,>LE01Gene09851,>LE01Gene10849,>LE01Gene13008,>LE01Gene05850,>LE01Gene01014,>LE01Gene08932,>LE01Gene01076,>LE01Gene01061,>LE01Gene08075,>LE01Gene01885,>LE01Gene05820,>LE01Gene…	0.00109901
													Biological process	fatty acid biosynthetic process	GO:0006633	9	9.18e-05	3.54451	11	26	680	5697	>LE01Gene04206,>LE01Gene02429,>LE01Gene09887,>LE01Gene06312,>LE01Gene06357,>LE01Gene03176,>LE01Gene09670,>LE01Gene08313,>LE01Gene03091,>LE01Gene03453,>LE01Gene01288,	0.00117167
													Biological process	tricarboxylic acid metabolic process	GO:0072350	7	0.000107	3.11181	13	35	680	5697	>LE01Gene01135,>LE01Gene01549,>LE01Gene01574,>LE01Gene11377,>LE01Gene08443,>LE01Gene10348,>LE01Gene02208,>LE01Gene10685,>LE01Gene03065,>LE01Gene06114,>LE01Gene02513,>LE01Gene03404,>LE01Gene11013,	0.00134736
													Biological process	microtubule-based process	GO:0007017	3	0.000107	3.11181	13	35	680	5697	>LE01Gene05546,>LE01Gene05437,>LE01Gene01434,>LE01Gene01435,>LE01Gene11633,>LE01Gene12981,>LE01Gene00049,>LE01Gene03108,>LE01Gene00089,>LE01Gene09610,>LE01Gene09135,>LE01Gene00757,>LE01Gene08622,	0.00134736
													Biological process	tricarboxylic acid cycle	GO:0006099	4	0.000107	3.11181	13	35	680	5697	>LE01Gene01135,>LE01Gene01549,>LE01Gene01574,>LE01Gene11377,>LE01Gene08443,>LE01Gene10348,>LE01Gene02208,>LE01Gene10685,>LE01Gene03065,>LE01Gene06114,>LE01Gene02513,>LE01Gene03404,>LE01Gene11013,	0.00134736
													Biological process	citrate metabolic process	GO:0006101	8	0.000107	3.11181	13	35	680	5697	>LE01Gene01135,>LE01Gene01549,>LE01Gene01574,>LE01Gene11377,>LE01Gene08443,>LE01Gene10348,>LE01Gene02208,>LE01Gene10685,>LE01Gene03065,>LE01Gene06114,>LE01Gene02513,>LE01Gene03404,>LE01Gene11013,	0.00134736
													Biological process	cellular biosynthetic process	GO:0044249	4	0.00011	1.27333	176	1158	680	5697	>LE01Gene03323,>LE01Gene06839,>LE01Gene13123,>LE01Gene05510,>LE01Gene02458,>LE01Gene14438,>LE01Gene03366,>LE01Gene03363,>LE01Gene04224,>LE01Gene03347,>LE01Gene03345,>LE01Gene04206,>LE01Gene13527,>LE01Gene01553,>LE01Gene08161,>LE01Gene10059,>LE01Gene01107,>LE01Gene00240,>LE01Gene00242,>LE01Gene02429,>LE01Gene11377,>LE01Gene09887,>LE01Gene00662,>LE01Gene01992,>LE01Gene00669,>LE01Gene01960,>LE01Gene…	0.00132441
													Biological process	microtubule-based movement	GO:0007018	4	0.000142	3.9685	9	19	680	5697	>LE01Gene05546,>LE01Gene05437,>LE01Gene11633,>LE01Gene12981,>LE01Gene00049,>LE01Gene03108,>LE01Gene00089,>LE01Gene09610,>LE01Gene00757,	0.00169885
													Biological process	steroid metabolic process	GO:0008202	5	0.000146	3.64258	10	23	680	5697	>LE01Gene11394,>LE01Gene11772,>LE01Gene04161,>LE01Gene00118,>LE01Gene13422,>LE01Gene07594,>LE01Gene05248,>LE01Gene04343,>LE01Gene09550,>LE01Gene04255,	0.00173519
													Biological process	mitochondrial electron transport, NADH to ubiquinone	GO:0006120	9	0.000173	5.58529	6	9	680	5697	>LE01Gene13123,>LE01Gene09851,>LE01Gene08432,>LE01Gene05778,>LE01Gene10683,>LE01Gene02186,	0.00202792
													Biological process	translation	GO:0006412	8	0.000179	1.66202	49	247	680	5697	>LE01Gene03323,>LE01Gene14438,>LE01Gene03363,>LE01Gene00242,>LE01Gene00662,>LE01Gene01960,>LE01Gene11776,>LE01Gene09867,>LE01Gene05499,>LE01Gene05411,>LE01Gene08921,>LE01Gene13881,>LE01Gene11238,>LE01Gene01898,>LE01Gene00147,>LE01Gene10309,>LE01Gene10753,>LE01Gene00960,>LE01Gene02296,>LE01Gene00911,>LE01Gene08401,>LE01Gene02226,>LE01Gene03586,>LE01Gene03109,>LE01Gene00087,>LE01Gene01789,>LE01Gene…	0.00207267
													Biological process	monocarboxylic acid biosynthetic process	GO:0072330	8	0.000179	2.28489	21	77	680	5697	>LE01Gene04224,>LE01Gene03347,>LE01Gene04206,>LE01Gene01553,>LE01Gene02429,>LE01Gene11377,>LE01Gene09887,>LE01Gene06312,>LE01Gene06357,>LE01Gene05820,>LE01Gene13422,>LE01Gene03176,>LE01Gene10284,>LE01Gene09670,>LE01Gene08313,>LE01Gene03091,>LE01Gene03453,>LE01Gene03424,>LE01Gene04343,>LE01Gene01288,>LE01Gene06023,	0.00205465
													Biological process	cellular component organization	GO:0016043	4	0.000219	1.60429	54	282	680	5697	>LE01Gene05993,>LE01Gene05510,>LE01Gene03366,>LE01Gene02038,>LE01Gene05520,>LE01Gene02019,>LE01Gene12689,>LE01Gene01533,>LE01Gene10059,>LE01Gene10066,>LE01Gene09893,>LE01Gene08568,>LE01Gene00662,>LE01Gene05096,>LE01Gene07645,>LE01Gene08526,>LE01Gene12144,>LE01Gene02350,>LE01Gene08065,>LE01Gene01434,>LE01Gene01435,>LE01Gene08056,>LE01Gene01831,>LE01Gene00959,>LE01Gene06270,>LE01Gene10330,>LE01Gene…	0.00249402
													Biological process	ribonucleoprotein complex biogenesis	GO:0022613	5	0.000262	1.76868	38	180	680	5697	>LE01Gene03323,>LE01Gene14438,>LE01Gene03363,>LE01Gene13145,>LE01Gene00242,>LE01Gene01960,>LE01Gene09867,>LE01Gene05499,>LE01Gene01045,>LE01Gene05411,>LE01Gene08921,>LE01Gene13881,>LE01Gene11238,>LE01Gene00147,>LE01Gene10309,>LE01Gene00960,>LE01Gene02727,>LE01Gene02296,>LE01Gene00911,>LE01Gene08401,>LE01Gene03586,>LE01Gene00461,>LE01Gene13327,>LE01Gene12459,>LE01Gene11500,>LE01Gene00865,>LE01Gene…	0.0029485
													Biological process	organelle organization	GO:0006996	5	0.000268	1.6993	43	212	680	5697	>LE01Gene05510,>LE01Gene03366,>LE01Gene02038,>LE01Gene05520,>LE01Gene02019,>LE01Gene10059,>LE01Gene10066,>LE01Gene08568,>LE01Gene05096,>LE01Gene07645,>LE01Gene08526,>LE01Gene12144,>LE01Gene02350,>LE01Gene08065,>LE01Gene08056,>LE01Gene01831,>LE01Gene00959,>LE01Gene06270,>LE01Gene10330,>LE01Gene11651,>LE01Gene12981,>LE01Gene08839,>LE01Gene00925,>LE01Gene08828,>LE01Gene02290,>LE01Gene11108,>LE01Gene…	0.0029886
													Biological process	cellular amide metabolic process	GO:0043603	5	0.000284	1.53932	61	332	680	5697	>LE01Gene03323,>LE01Gene14438,>LE01Gene03363,>LE01Gene03347,>LE01Gene01553,>LE01Gene00230,>LE01Gene00242,>LE01Gene00662,>LE01Gene01960,>LE01Gene11776,>LE01Gene09867,>LE01Gene05499,>LE01Gene03255,>LE01Gene05411,>LE01Gene08921,>LE01Gene13881,>LE01Gene11238,>LE01Gene01898,>LE01Gene00147,>LE01Gene10309,>LE01Gene10753,>LE01Gene00960,>LE01Gene07168,>LE01Gene02296,>LE01Gene00911,>LE01Gene08401,>LE01Gene…	0.0031382
													Biological process	fatty acid metabolic process	GO:0006631	8	0.000295	2.7277	14	43	680	5697	>LE01Gene04206,>LE01Gene02429,>LE01Gene09887,>LE01Gene06312,>LE01Gene06357,>LE01Gene13422,>LE01Gene03176,>LE01Gene09670,>LE01Gene08313,>LE01Gene03091,>LE01Gene05244,>LE01Gene03453,>LE01Gene04343,>LE01Gene01288,	0.00323124
													Biological process	amide biosynthetic process	GO:0043604	6	0.000317	1.58185	54	286	680	5697	>LE01Gene03323,>LE01Gene14438,>LE01Gene03363,>LE01Gene03347,>LE01Gene01553,>LE01Gene00242,>LE01Gene00662,>LE01Gene01960,>LE01Gene11776,>LE01Gene09867,>LE01Gene05499,>LE01Gene05411,>LE01Gene08921,>LE01Gene13881,>LE01Gene11238,>LE01Gene01898,>LE01Gene00147,>LE01Gene10309,>LE01Gene10753,>LE01Gene00960,>LE01Gene02296,>LE01Gene00911,>LE01Gene08401,>LE01Gene02226,>LE01Gene03586,>LE01Gene03109,>LE01Gene…	0.00344297
													Biological process	peptide biosynthetic process	GO:0043043	7	0.000358	1.61622	49	254	680	5697	>LE01Gene03323,>LE01Gene14438,>LE01Gene03363,>LE01Gene00242,>LE01Gene00662,>LE01Gene01960,>LE01Gene11776,>LE01Gene09867,>LE01Gene05499,>LE01Gene05411,>LE01Gene08921,>LE01Gene13881,>LE01Gene11238,>LE01Gene01898,>LE01Gene00147,>LE01Gene10309,>LE01Gene10753,>LE01Gene00960,>LE01Gene02296,>LE01Gene00911,>LE01Gene08401,>LE01Gene02226,>LE01Gene03586,>LE01Gene03109,>LE01Gene00087,>LE01Gene01789,>LE01Gene…	0.00384651
													Biological process	obsolete movement of cell or subcellular component	GO:0006928	0	0.000362	3.59055	9	21	680	5697	>LE01Gene05546,>LE01Gene05437,>LE01Gene11633,>LE01Gene12981,>LE01Gene00049,>LE01Gene03108,>LE01Gene00089,>LE01Gene09610,>LE01Gene00757,	0.00385417
													Biological process	nucleoside diphosphate metabolic process	GO:0009132	8	0.000373	2.79265	13	39	680	5697	>LE01Gene06839,>LE01Gene04224,>LE01Gene01553,>LE01Gene11377,>LE01Gene08137,>LE01Gene06315,>LE01Gene05820,>LE01Gene13422,>LE01Gene10284,>LE01Gene00801,>LE01Gene03424,>LE01Gene04343,>LE01Gene08254,	0.00393437
													Biological process	cell cycle	GO:0007049	3	0.000381	2.05174	24	98	680	5697	>LE01Gene05510,>LE01Gene02417,>LE01Gene05096,>LE01Gene05877,>LE01Gene01018,>LE01Gene01831,>LE01Gene12981,>LE01Gene09747,>LE01Gene00934,>LE01Gene10713,>LE01Gene01309,>LE01Gene10236,>LE01Gene11519,>LE01Gene10631,>LE01Gene03067,>LE01Gene03085,>LE01Gene14559,>LE01Gene11098,>LE01Gene00799,>LE01Gene09135,>LE01Gene11494,>LE01Gene11404,>LE01Gene05105,>LE01Gene07300,	0.00398798
													Biological process	establishment of localization	GO:0051234	3	0.000426	1.31336	124	791	680	5697	>LE01Gene00297,>LE01Gene13123,>LE01Gene01153,>LE01Gene01120,>LE01Gene00276,>LE01Gene05547,>LE01Gene09041,>LE01Gene12689,>LE01Gene01533,>LE01Gene00254,>LE01Gene10064,>LE01Gene12240,>LE01Gene00234,>LE01Gene01574,>LE01Gene05076,>LE01Gene09889,>LE01Gene09893,>LE01Gene09891,>LE01Gene13912,>LE01Gene08571,>LE01Gene08155,>LE01Gene07276,>LE01Gene12618,>LE01Gene09820,>LE01Gene03264,>LE01Gene13065,>LE01Gene…	0.00441994
													Biological process	organophosphate biosynthetic process	GO:0090407	6	0.000448	1.82377	32	147	680	5697	>LE01Gene04224,>LE01Gene01553,>LE01Gene11377,>LE01Gene01992,>LE01Gene06315,>LE01Gene13008,>LE01Gene04586,>LE01Gene01885,>LE01Gene05820,>LE01Gene14307,>LE01Gene13422,>LE01Gene13437,>LE01Gene01831,>LE01Gene09341,>LE01Gene03156,>LE01Gene02243,>LE01Gene03585,>LE01Gene06610,>LE01Gene01780,>LE01Gene00457,>LE01Gene13331,>LE01Gene10284,>LE01Gene03934,>LE01Gene00801,>LE01Gene03424,>LE01Gene03007,>LE01Gene…	0.00460323
													Biological process	peptide metabolic process	GO:0006518	6	0.000551	1.57086	51	272	680	5697	>LE01Gene03323,>LE01Gene14438,>LE01Gene03363,>LE01Gene00242,>LE01Gene00662,>LE01Gene01960,>LE01Gene11776,>LE01Gene09867,>LE01Gene05499,>LE01Gene05411,>LE01Gene08921,>LE01Gene13881,>LE01Gene11238,>LE01Gene01898,>LE01Gene00147,>LE01Gene10309,>LE01Gene10753,>LE01Gene00960,>LE01Gene07168,>LE01Gene02296,>LE01Gene00911,>LE01Gene08401,>LE01Gene02226,>LE01Gene03586,>LE01Gene03109,>LE01Gene00087,>LE01Gene…	0.0056128
													Biological process	transmembrane transport	GO:0055085	5	0.000571	1.414	80	474	680	5697	>LE01Gene13123,>LE01Gene01153,>LE01Gene01120,>LE01Gene00276,>LE01Gene05547,>LE01Gene00254,>LE01Gene12240,>LE01Gene05076,>LE01Gene13912,>LE01Gene08571,>LE01Gene08155,>LE01Gene07276,>LE01Gene12618,>LE01Gene03264,>LE01Gene13065,>LE01Gene06786,>LE01Gene06355,>LE01Gene08516,>LE01Gene09851,>LE01Gene07683,>LE01Gene06352,>LE01Gene13008,>LE01Gene05850,>LE01Gene01077,>LE01Gene04586,>LE01Gene01076,>LE01Gene…	0.00576708
													Biological process	localization	GO:0051179	2	0.000585	1.30347	124	797	680	5697	>LE01Gene00297,>LE01Gene13123,>LE01Gene01153,>LE01Gene01120,>LE01Gene00276,>LE01Gene05547,>LE01Gene09041,>LE01Gene12689,>LE01Gene01533,>LE01Gene00254,>LE01Gene10064,>LE01Gene12240,>LE01Gene00234,>LE01Gene01574,>LE01Gene05076,>LE01Gene09889,>LE01Gene09893,>LE01Gene09891,>LE01Gene13912,>LE01Gene08571,>LE01Gene08155,>LE01Gene07276,>LE01Gene12618,>LE01Gene09820,>LE01Gene03264,>LE01Gene13065,>LE01Gene…	0.00585332
													Biological process	mitotic cell cycle	GO:0000278	4	0.000624	2.79265	12	36	680	5697	>LE01Gene05510,>LE01Gene02417,>LE01Gene05096,>LE01Gene01831,>LE01Gene12981,>LE01Gene09747,>LE01Gene11519,>LE01Gene03085,>LE01Gene14559,>LE01Gene11098,>LE01Gene11494,>LE01Gene05105,	0.00619449
													Biological process	transport	GO:0006810	4	0.00105088	1.28973	121	786	680	5697	>LE01Gene00297,>LE01Gene13123,>LE01Gene01153,>LE01Gene01120,>LE01Gene00276,>LE01Gene05547,>LE01Gene09041,>LE01Gene00254,>LE01Gene10064,>LE01Gene12240,>LE01Gene00234,>LE01Gene01574,>LE01Gene05076,>LE01Gene09889,>LE01Gene09893,>LE01Gene09891,>LE01Gene13912,>LE01Gene08571,>LE01Gene08155,>LE01Gene07276,>LE01Gene12618,>LE01Gene09820,>LE01Gene03264,>LE01Gene13065,>LE01Gene06786,>LE01Gene06355,>LE01Gene…	0.0103395
													Biological process	obsolete oxidation-reduction process	GO:0055114	0	0.00176403	1.27726	118	774	680	5697	>LE01Gene06839,>LE01Gene13123,>LE01Gene02450,>LE01Gene01123,>LE01Gene01135,>LE01Gene04224,>LE01Gene06893,>LE01Gene06865,>LE01Gene04206,>LE01Gene01549,>LE01Gene01553,>LE01Gene02435,>LE01Gene12240,>LE01Gene11394,>LE01Gene01567,>LE01Gene01574,>LE01Gene02429,>LE01Gene11377,>LE01Gene09065,>LE01Gene09434,>LE01Gene09887,>LE01Gene08137,>LE01Gene00669,>LE01Gene07270,>LE01Gene11772,>LE01Gene06312,>LE01Gene…	0.017067
													Biological process	cellular ketone metabolic process	GO:0042180	4	0.00193633	3.1916	8	21	680	5697	>LE01Gene13123,>LE01Gene11700,>LE01Gene09851,>LE01Gene08432,>LE01Gene05778,>LE01Gene10683,>LE01Gene02186,>LE01Gene10911,	0.0185792
													Biological process	cellular response to DNA damage stimulus	GO:0006974	5	0.00212488	1.68647	31	154	680	5697	>LE01Gene00298,>LE01Gene13119,>LE01Gene02413,>LE01Gene01563,>LE01Gene10887,>LE01Gene03287,>LE01Gene04172,>LE01Gene05877,>LE01Gene11291,>LE01Gene02350,>LE01Gene01474,>LE01Gene04982,>LE01Gene02727,>LE01Gene10312,>LE01Gene11659,>LE01Gene05332,>LE01Gene00925,>LE01Gene08815,>LE01Gene06642,>LE01Gene03142,>LE01Gene07021,>LE01Gene00899,>LE01Gene00874,>LE01Gene02184,>LE01Gene03094,>LE01Gene06943,>LE01Gene…	0.0202212
													Biological process	mitotic cell cycle process	GO:1903047	4	0.00221648	2.90006	9	26	680	5697	>LE01Gene05510,>LE01Gene05096,>LE01Gene01831,>LE01Gene12981,>LE01Gene11519,>LE01Gene03085,>LE01Gene11098,>LE01Gene11494,>LE01Gene05105,	0.0209214
													Biological process	sodium ion transport	GO:0006814	8	0.00231296	3.86674	6	13	680	5697	>LE01Gene13123,>LE01Gene09851,>LE01Gene08432,>LE01Gene05778,>LE01Gene10683,>LE01Gene02186,	0.021656
													Biological process	DNA repair	GO:0006281	8	0.0027596	1.67559	30	150	680	5697	>LE01Gene00298,>LE01Gene13119,>LE01Gene02413,>LE01Gene01563,>LE01Gene10887,>LE01Gene03287,>LE01Gene04172,>LE01Gene05877,>LE01Gene11291,>LE01Gene02350,>LE01Gene01474,>LE01Gene04982,>LE01Gene02727,>LE01Gene10312,>LE01Gene11659,>LE01Gene05332,>LE01Gene00925,>LE01Gene08815,>LE01Gene06642,>LE01Gene03142,>LE01Gene07021,>LE01Gene00899,>LE01Gene00874,>LE01Gene02184,>LE01Gene03094,>LE01Gene06943,>LE01Gene…	0.0256312
													Biological process	isoprenoid metabolic process	GO:0006720	6	0.00297914	2.79265	9	27	680	5697	>LE01Gene11772,>LE01Gene05875,>LE01Gene00158,>LE01Gene00118,>LE01Gene13422,>LE01Gene01390,>LE01Gene08749,>LE01Gene05259,>LE01Gene04343,	0.0274507
													Biological process	antibiotic metabolic process	GO:0016999	3	0.00312754	2.12999	15	59	680	5697	>LE01Gene01135,>LE01Gene01549,>LE01Gene01574,>LE01Gene11377,>LE01Gene13422,>LE01Gene08443,>LE01Gene10348,>LE01Gene02208,>LE01Gene10685,>LE01Gene03065,>LE01Gene06114,>LE01Gene04343,>LE01Gene02513,>LE01Gene03404,>LE01Gene11013,	0.0285911
													Biological process	response to stress	GO:0006950	3	0.00327047	1.52665	41	225	680	5697	>LE01Gene00298,>LE01Gene13119,>LE01Gene02413,>LE01Gene01563,>LE01Gene07256,>LE01Gene10887,>LE01Gene03287,>LE01Gene04172,>LE01Gene05877,>LE01Gene11291,>LE01Gene02350,>LE01Gene01474,>LE01Gene04982,>LE01Gene09300,>LE01Gene02727,>LE01Gene10312,>LE01Gene12981,>LE01Gene11659,>LE01Gene05332,>LE01Gene00925,>LE01Gene08815,>LE01Gene06642,>LE01Gene03142,>LE01Gene06611,>LE01Gene07021,>LE01Gene03920,>LE01Gene…	0.0296642
													Biological process	obsolete oxidoreduction coenzyme metabolic process	GO:0006733	0	0.00344589	1.95848	18	77	680	5697	>LE01Gene13123,>LE01Gene04224,>LE01Gene01553,>LE01Gene11377,>LE01Gene11700,>LE01Gene09851,>LE01Gene03255,>LE01Gene05820,>LE01Gene13422,>LE01Gene03156,>LE01Gene08432,>LE01Gene05778,>LE01Gene10284,>LE01Gene10683,>LE01Gene02186,>LE01Gene03424,>LE01Gene04343,>LE01Gene10911,	0.031013
													Biological process	protein transmembrane transport	GO:0071806	8	0.00359402	4.18897	5	10	680	5697	>LE01Gene08056,>LE01Gene08419,>LE01Gene12896,>LE01Gene10655,>LE01Gene00359,	0.0320974
													Biological process	cell cycle phase transition	GO:0044770	4	0.00364356	3.59055	6	14	680	5697	>LE01Gene05510,>LE01Gene11519,>LE01Gene03085,>LE01Gene11098,>LE01Gene11494,>LE01Gene11404,	0.0322914
													Biological process	purine nucleoside diphosphate metabolic process	GO:0009135	9	0.00389832	2.53877	10	33	680	5697	>LE01Gene04224,>LE01Gene01553,>LE01Gene11377,>LE01Gene06315,>LE01Gene05820,>LE01Gene13422,>LE01Gene10284,>LE01Gene00801,>LE01Gene03424,>LE01Gene04343,	0.0342875
													Biological process	ADP metabolic process	GO:0046031	11	0.00389832	2.53877	10	33	680	5697	>LE01Gene04224,>LE01Gene01553,>LE01Gene11377,>LE01Gene06315,>LE01Gene05820,>LE01Gene13422,>LE01Gene10284,>LE01Gene00801,>LE01Gene03424,>LE01Gene04343,	0.0342875
													Biological process	purine ribonucleoside diphosphate metabolic process	GO:0009179	10	0.00389832	2.53877	10	33	680	5697	>LE01Gene04224,>LE01Gene01553,>LE01Gene11377,>LE01Gene06315,>LE01Gene05820,>LE01Gene13422,>LE01Gene10284,>LE01Gene00801,>LE01Gene03424,>LE01Gene04343,	0.0342875
													Biological process	ribonucleoside diphosphate metabolic process	GO:0009185	9	0.00389832	2.53877	10	33	680	5697	>LE01Gene04224,>LE01Gene01553,>LE01Gene11377,>LE01Gene06315,>LE01Gene05820,>LE01Gene13422,>LE01Gene10284,>LE01Gene00801,>LE01Gene03424,>LE01Gene04343,	0.0342875
													Biological process	chromosome organization	GO:0051276	6	0.00461802	1.68858	26	129	680	5697	>LE01Gene03366,>LE01Gene02038,>LE01Gene05520,>LE01Gene02019,>LE01Gene10059,>LE01Gene10066,>LE01Gene05096,>LE01Gene08526,>LE01Gene12144,>LE01Gene02350,>LE01Gene08065,>LE01Gene00959,>LE01Gene06270,>LE01Gene11651,>LE01Gene12981,>LE01Gene08839,>LE01Gene00925,>LE01Gene02290,>LE01Gene11108,>LE01Gene13321,>LE01Gene13783,>LE01Gene13301,>LE01Gene03927,>LE01Gene03085,>LE01Gene06943,>LE01Gene05105,	0.0394229
													Biological process	obsolete cofactor biosynthetic process	GO:0051188	0	0.00565409	1.70399	24	118	680	5697	>LE01Gene13123,>LE01Gene04224,>LE01Gene03347,>LE01Gene01553,>LE01Gene11377,>LE01Gene05475,>LE01Gene11700,>LE01Gene09851,>LE01Gene05875,>LE01Gene05820,>LE01Gene13422,>LE01Gene10315,>LE01Gene08432,>LE01Gene02210,>LE01Gene05778,>LE01Gene10284,>LE01Gene08313,>LE01Gene10683,>LE01Gene02186,>LE01Gene03424,>LE01Gene04343,>LE01Gene01288,>LE01Gene06023,>LE01Gene10911,	0.0479153
													Biological process	RNA phosphodiester bond hydrolysis, endonucleolytic	GO:0090502	9	0.00594807	3.80816	5	11	680	5697	>LE01Gene01463,>LE01Gene08868,>LE01Gene05327,>LE01Gene12494,>LE01Gene10136,	0.0500414
													Biological process	isoprenoid biosynthetic process	GO:0008299	7	0.00639609	2.93228	7	20	680	5697	>LE01Gene11772,>LE01Gene05875,>LE01Gene00158,>LE01Gene00118,>LE01Gene01390,>LE01Gene08749,>LE01Gene05259,	0.0519291
													Biological process	cell wall biogenesis	GO:0042546	5	0.00639609	2.93228	7	20	680	5697	>LE01Gene13539,>LE01Gene13506,>LE01Gene13552,>LE01Gene13554,>LE01Gene10826,>LE01Gene08487,>LE01Gene03013,	0.0519291
													Biological process	nucleic acid phosphodiester bond hydrolysis	GO:0090305	7	0.00671969	2.09449	13	52	680	5697	>LE01Gene00240,>LE01Gene05877,>LE01Gene11291,>LE01Gene01463,>LE01Gene02727,>LE01Gene10312,>LE01Gene08868,>LE01Gene05327,>LE01Gene12494,>LE01Gene12479,>LE01Gene00899,>LE01Gene10136,>LE01Gene08212,	0.0538038
													Biological process	cellular response to stress	GO:0033554	4	0.00689072	1.56456	31	166	680	5697	>LE01Gene00298,>LE01Gene13119,>LE01Gene02413,>LE01Gene01563,>LE01Gene10887,>LE01Gene03287,>LE01Gene04172,>LE01Gene05877,>LE01Gene11291,>LE01Gene02350,>LE01Gene01474,>LE01Gene04982,>LE01Gene02727,>LE01Gene10312,>LE01Gene11659,>LE01Gene05332,>LE01Gene00925,>LE01Gene08815,>LE01Gene06642,>LE01Gene03142,>LE01Gene07021,>LE01Gene00899,>LE01Gene00874,>LE01Gene02184,>LE01Gene03094,>LE01Gene06943,>LE01Gene…	0.0547954
													Biological process	protein metabolic process	GO:0019538	5	0.00693494	1.20565	137	952	680	5697	>LE01Gene03323,>LE01Gene05510,>LE01Gene14438,>LE01Gene03363,>LE01Gene02037,>LE01Gene02019,>LE01Gene14484,>LE01Gene01183,>LE01Gene01184,>LE01Gene09035,>LE01Gene01523,>LE01Gene12662,>LE01Gene01107,>LE01Gene10065,>LE01Gene00242,>LE01Gene09889,>LE01Gene00662,>LE01Gene00667,>LE01Gene01960,>LE01Gene02814,>LE01Gene01970,>LE01Gene11776,>LE01Gene06313,>LE01Gene01092,>LE01Gene09867,>LE01Gene10849,>LE01Gene…	0.0547719
													Biological process	obsolete electron transport	GO:0006118	0	0.00696963	2.02226	14	58	680	5697	>LE01Gene11377,>LE01Gene01912,>LE01Gene05850,>LE01Gene07617,>LE01Gene08075,>LE01Gene00943,>LE01Gene03544,>LE01Gene05778,>LE01Gene02208,>LE01Gene10227,>LE01Gene05255,>LE01Gene08705,>LE01Gene13274,>LE01Gene11013,	0.0546739
													Biological process	leucine metabolic process	GO:0006551	9	0.00827616	2.43231	9	31	680	5697	>LE01Gene04224,>LE01Gene03347,>LE01Gene01553,>LE01Gene11776,>LE01Gene13422,>LE01Gene10284,>LE01Gene08749,>LE01Gene04343,>LE01Gene06023,	0.0644874
													Biological process	valine metabolic process	GO:0006573	9	0.00827616	2.43231	9	31	680	5697	>LE01Gene04224,>LE01Gene03347,>LE01Gene01553,>LE01Gene11776,>LE01Gene13422,>LE01Gene10284,>LE01Gene08749,>LE01Gene04343,>LE01Gene06023,	0.0644874
													Biological process	obsolete coenzyme biosynthetic process	GO:0009108	0	0.00944609	1.72741	20	97	680	5697	>LE01Gene13123,>LE01Gene04224,>LE01Gene03347,>LE01Gene01553,>LE01Gene11377,>LE01Gene11700,>LE01Gene09851,>LE01Gene05820,>LE01Gene13422,>LE01Gene08432,>LE01Gene05778,>LE01Gene10284,>LE01Gene08313,>LE01Gene10683,>LE01Gene02186,>LE01Gene03424,>LE01Gene04343,>LE01Gene01288,>LE01Gene06023,>LE01Gene10911,	0.0726285
													Biological process	organophosphate catabolic process	GO:0046434	6	0.010975	1.98024	13	55	680	5697	>LE01Gene04224,>LE01Gene00690,>LE01Gene01553,>LE01Gene00230,>LE01Gene11377,>LE01Gene05820,>LE01Gene13422,>LE01Gene09333,>LE01Gene10284,>LE01Gene07878,>LE01Gene03424,>LE01Gene04343,>LE01Gene00777,	0.0838286
													Biological process	monocarboxylic acid metabolic process	GO:0032787	7	0.0120875	1.58673	25	132	680	5697	>LE01Gene04224,>LE01Gene03347,>LE01Gene04206,>LE01Gene01553,>LE01Gene02429,>LE01Gene11377,>LE01Gene09887,>LE01Gene06312,>LE01Gene06357,>LE01Gene05820,>LE01Gene13422,>LE01Gene08443,>LE01Gene10348,>LE01Gene03176,>LE01Gene10284,>LE01Gene09670,>LE01Gene08313,>LE01Gene03091,>LE01Gene05244,>LE01Gene03453,>LE01Gene03424,>LE01Gene04343,>LE01Gene01288,>LE01Gene11013,>LE01Gene06023,	0.0917231
													Biological process	obsolete coenzyme metabolic process	GO:0006732	0	0.0120875	1.58673	25	132	680	5697	>LE01Gene13123,>LE01Gene04224,>LE01Gene03347,>LE01Gene01553,>LE01Gene11377,>LE01Gene11772,>LE01Gene11700,>LE01Gene09851,>LE01Gene03255,>LE01Gene05820,>LE01Gene13422,>LE01Gene03156,>LE01Gene08432,>LE01Gene05778,>LE01Gene10284,>LE01Gene08313,>LE01Gene10694,>LE01Gene10683,>LE01Gene08749,>LE01Gene02186,>LE01Gene03424,>LE01Gene04343,>LE01Gene01288,>LE01Gene06023,>LE01Gene10911,	0.0917231
													Biological process	phospholipid catabolic process	GO:0009395	7	0.0135176	3.22229	5	13	680	5697	>LE01Gene00690,>LE01Gene00230,>LE01Gene09333,>LE01Gene07878,>LE01Gene00777,	0.101252
													Biological process	cellular localization	GO:0051641	3	0.0137779	1.44309	36	209	680	5697	>LE01Gene09041,>LE01Gene12689,>LE01Gene01533,>LE01Gene00234,>LE01Gene01574,>LE01Gene09889,>LE01Gene09891,>LE01Gene10844,>LE01Gene01429,>LE01Gene01892,>LE01Gene08056,>LE01Gene09318,>LE01Gene01831,>LE01Gene12981,>LE01Gene10325,>LE01Gene09341,>LE01Gene03144,>LE01Gene08419,>LE01Gene02289,>LE01Gene08828,>LE01Gene05769,>LE01Gene12896,>LE01Gene13329,>LE01Gene10655,>LE01Gene08381,>LE01Gene08385,>LE01Gene…	0.102539
													Biological process	nucleotide phosphorylation	GO:0046939	7	0.0138425	2.14819	10	39	680	5697	>LE01Gene04224,>LE01Gene01553,>LE01Gene11377,>LE01Gene06315,>LE01Gene05820,>LE01Gene13422,>LE01Gene10284,>LE01Gene00801,>LE01Gene03424,>LE01Gene04343,	0.102364
													Biological process	glycoprotein metabolic process	GO:0009100	6	0.0147125	2.54981	7	23	680	5697	>LE01Gene01107,>LE01Gene06313,>LE01Gene08458,>LE01Gene00093,>LE01Gene01648,>LE01Gene07362,>LE01Gene10924,	0.0993095
													Biological process	cellular lipid catabolic process	GO:0044242	6	0.0147125	2.54981	7	23	680	5697	>LE01Gene00690,>LE01Gene00230,>LE01Gene13422,>LE01Gene09333,>LE01Gene07878,>LE01Gene04343,>LE01Gene00777,	0.0993095
													Biological process	leucine biosynthetic process	GO:0009098	10	0.0148324	2.79265	6	18	680	5697	>LE01Gene04224,>LE01Gene03347,>LE01Gene01553,>LE01Gene11776,>LE01Gene10284,>LE01Gene06023,	0.0989682
													Biological process	valine biosynthetic process	GO:0009099	10	0.0148324	2.79265	6	18	680	5697	>LE01Gene04224,>LE01Gene03347,>LE01Gene01553,>LE01Gene11776,>LE01Gene10284,>LE01Gene06023,	0.0989682
													Biological process	isoleucine metabolic process	GO:0006549	9	0.0155434	2.21769	9	34	680	5697	>LE01Gene04224,>LE01Gene03347,>LE01Gene01553,>LE01Gene11776,>LE01Gene13422,>LE01Gene10284,>LE01Gene08749,>LE01Gene04343,>LE01Gene06023,	0.101381
													Biological process	branched-chain amino acid metabolic process	GO:0009081	8	0.0187772	2.15433	9	35	680	5697	>LE01Gene04224,>LE01Gene03347,>LE01Gene01553,>LE01Gene11776,>LE01Gene13422,>LE01Gene10284,>LE01Gene08749,>LE01Gene04343,>LE01Gene06023,	0.121789
													Biological process	reductive tricarboxylic acid cycle	GO:0019643	5	0.0190032	2.99212	5	14	680	5697	>LE01Gene08443,>LE01Gene10685,>LE01Gene03065,>LE01Gene03404,>LE01Gene11013,	0.122571
													Biological process	carbon fixation	GO:0015977	4	0.0190032	2.99212	5	14	680	5697	>LE01Gene08443,>LE01Gene10685,>LE01Gene03065,>LE01Gene03404,>LE01Gene11013,	0.122571
													Biological process	energy coupled proton transmembrane transport, against electrochemical gradient	GO:0015988	10	0.0190032	2.99212	5	14	680	5697	>LE01Gene01120,>LE01Gene06352,>LE01Gene03585,>LE01Gene06610,>LE01Gene10225,	0.122571
													Biological process	mitotic nuclear division	GO:0140014	8	0.0195435	2.64567	6	19	680	5697	>LE01Gene05510,>LE01Gene05096,>LE01Gene12981,>LE01Gene11519,>LE01Gene03085,>LE01Gene05105,	0.123989
													Biological process	cell cycle process	GO:0022402	3	0.0199443	1.96079	11	47	680	5697	>LE01Gene05510,>LE01Gene05096,>LE01Gene01831,>LE01Gene12981,>LE01Gene11519,>LE01Gene03085,>LE01Gene11098,>LE01Gene09135,>LE01Gene11494,>LE01Gene11404,>LE01Gene05105,	0.125844
													Biological process	obsolete cofactor metabolic process	GO:0051186	0	0.0228476	1.42603	32	188	680	5697	>LE01Gene13123,>LE01Gene04224,>LE01Gene03347,>LE01Gene01553,>LE01Gene11377,>LE01Gene11772,>LE01Gene05475,>LE01Gene11700,>LE01Gene09851,>LE01Gene05875,>LE01Gene03255,>LE01Gene05820,>LE01Gene13422,>LE01Gene10315,>LE01Gene03156,>LE01Gene08432,>LE01Gene02210,>LE01Gene05778,>LE01Gene10284,>LE01Gene06172,>LE01Gene08313,>LE01Gene10694,>LE01Gene10227,>LE01Gene10683,>LE01Gene08749,>LE01Gene02186,>LE01Gene…	0.143384
													Biological process	ATP generation from ADP	GO:0006757	12	0.0255699	2.16205	8	31	680	5697	>LE01Gene04224,>LE01Gene01553,>LE01Gene11377,>LE01Gene05820,>LE01Gene13422,>LE01Gene10284,>LE01Gene03424,>LE01Gene04343,	0.155427
													Biological process	pyruvate biosynthetic process	GO:0042866	9	0.0255699	2.16205	8	31	680	5697	>LE01Gene04224,>LE01Gene01553,>LE01Gene11377,>LE01Gene05820,>LE01Gene13422,>LE01Gene10284,>LE01Gene03424,>LE01Gene04343,	0.155427
													Biological process	glycolytic process	GO:0006096	13	0.0255699	2.16205	8	31	680	5697	>LE01Gene04224,>LE01Gene01553,>LE01Gene11377,>LE01Gene05820,>LE01Gene13422,>LE01Gene10284,>LE01Gene03424,>LE01Gene04343,	0.155427
													Biological process	response to organic substance	GO:0010033	4	0.0257709	2.79265	5	15	680	5697	>LE01Gene02703,>LE01Gene09740,>LE01Gene08702,>LE01Gene08685,>LE01Gene08688,	0.153436
													Biological process	methylation	GO:0032259	3	0.026308	1.63707	17	87	680	5697	>LE01Gene13145,>LE01Gene14484,>LE01Gene01523,>LE01Gene10887,>LE01Gene03658,>LE01Gene12036,>LE01Gene03965,>LE01Gene01309,>LE01Gene13331,>LE01Gene12855,>LE01Gene05248,>LE01Gene05661,>LE01Gene00780,>LE01Gene11414,>LE01Gene04255,>LE01Gene04235,>LE01Gene10911,	0.155835
													Biological process	organelle fission	GO:0048285	6	0.0287819	2.2556	7	26	680	5697	>LE01Gene05510,>LE01Gene05096,>LE01Gene12981,>LE01Gene11519,>LE01Gene03085,>LE01Gene03405,>LE01Gene05105,	0.169623
													Biological process	isoleucine biosynthetic process	GO:0009097	10	0.0317989	2.3937	6	21	680	5697	>LE01Gene04224,>LE01Gene03347,>LE01Gene01553,>LE01Gene11776,>LE01Gene10284,>LE01Gene06023,	0.186457
													Biological process	membrane lipid biosynthetic process	GO:0046467	7	0.0339032	2.61811	5	16	680	5697	>LE01Gene04206,>LE01Gene13437,>LE01Gene09341,>LE01Gene00457,>LE01Gene03001,	0.192949
													Biological process	lipid catabolic process	GO:0016042	5	0.0349911	2.17206	7	27	680	5697	>LE01Gene00690,>LE01Gene00230,>LE01Gene13422,>LE01Gene09333,>LE01Gene07878,>LE01Gene04343,>LE01Gene00777,	0.198169
													Biological process	nucleoside diphosphate phosphorylation	GO:0006165	9	0.0363828	2.03102	8	33	680	5697	>LE01Gene04224,>LE01Gene01553,>LE01Gene11377,>LE01Gene05820,>LE01Gene13422,>LE01Gene10284,>LE01Gene03424,>LE01Gene04343,	0.205051
													Biological process	nuclear division	GO:0000280	7	0.0394568	2.28489	6	22	680	5697	>LE01Gene05510,>LE01Gene05096,>LE01Gene12981,>LE01Gene11519,>LE01Gene03085,>LE01Gene05105,	0.200918
													Biological process	protein glycosylation	GO:0006486	7	0.0394568	2.28489	6	22	680	5697	>LE01Gene01107,>LE01Gene06313,>LE01Gene08458,>LE01Gene00093,>LE01Gene01648,>LE01Gene10924,	0.200918
													Biological process	macromolecule glycosylation	GO:0043413	6	0.0394568	2.28489	6	22	680	5697	>LE01Gene01107,>LE01Gene06313,>LE01Gene08458,>LE01Gene00093,>LE01Gene01648,>LE01Gene10924,	0.200918
													Biological process	branched-chain amino acid biosynthetic process	GO:0009082	9	0.0394568	2.28489	6	22	680	5697	>LE01Gene04224,>LE01Gene03347,>LE01Gene01553,>LE01Gene11776,>LE01Gene10284,>LE01Gene06023,	0.200918
													Biological process	glycoprotein biosynthetic process	GO:0009101	7	0.0394568	2.28489	6	22	680	5697	>LE01Gene01107,>LE01Gene06313,>LE01Gene08458,>LE01Gene00093,>LE01Gene01648,>LE01Gene10924,	0.200918
													Biological process	establishment of protein localization	GO:0045184	6	0.0404798	1.39632	28	168	680	5697	>LE01Gene09041,>LE01Gene12689,>LE01Gene01533,>LE01Gene09889,>LE01Gene09891,>LE01Gene10844,>LE01Gene01429,>LE01Gene08056,>LE01Gene01831,>LE01Gene10325,>LE01Gene09341,>LE01Gene08419,>LE01Gene02289,>LE01Gene08828,>LE01Gene05769,>LE01Gene12896,>LE01Gene13329,>LE01Gene10655,>LE01Gene08381,>LE01Gene08385,>LE01Gene10225,>LE01Gene08390,>LE01Gene00359,>LE01Gene11482,>LE01Gene11410,>LE01Gene04262,>LE01Gene…	0.201704
													Biological process	chromatin remodeling	GO:0006338	6	0.0420268	2.09449	7	28	680	5697	>LE01Gene05520,>LE01Gene10066,>LE01Gene12144,>LE01Gene08839,>LE01Gene11108,>LE01Gene13783,>LE01Gene13301,	0.204155
													Biological process	macromolecule biosynthetic process	GO:0009059	5	0.0420963	1.15876	113	817	680	5697	>LE01Gene03323,>LE01Gene06839,>LE01Gene05510,>LE01Gene02458,>LE01Gene14438,>LE01Gene03366,>LE01Gene03363,>LE01Gene03345,>LE01Gene13527,>LE01Gene08161,>LE01Gene10059,>LE01Gene01107,>LE01Gene00240,>LE01Gene00242,>LE01Gene00662,>LE01Gene01960,>LE01Gene00640,>LE01Gene11776,>LE01Gene06315,>LE01Gene06313,>LE01Gene05470,>LE01Gene05001,>LE01Gene09867,>LE01Gene07689,>LE01Gene08526,>LE01Gene05499,>LE01Gene…	0.203641
													Biological process	cellular macromolecule biosynthetic process	GO:0034645	6	0.0432466	1.15843	112	810	680	5697	>LE01Gene03323,>LE01Gene06839,>LE01Gene05510,>LE01Gene02458,>LE01Gene14438,>LE01Gene03366,>LE01Gene03363,>LE01Gene03345,>LE01Gene13527,>LE01Gene08161,>LE01Gene10059,>LE01Gene01107,>LE01Gene00240,>LE01Gene00242,>LE01Gene00662,>LE01Gene01960,>LE01Gene00640,>LE01Gene11776,>LE01Gene06315,>LE01Gene06313,>LE01Gene05470,>LE01Gene05001,>LE01Gene09867,>LE01Gene07689,>LE01Gene08526,>LE01Gene05499,>LE01Gene…	0.208337

## Sheet: ow_3-VS-ow_1
Up-regulated													Down-regulated
Class	GO_Name	GO_ID	GO_Level	P_value	EnrichmentScore	HitsGenesCountsInSelectedSet	HitsGenesCountsInBackground	AllGenesCountsInSelectedSet	AllGenesCountsInBackground	GenesOfSelectedSetInGOterm	corrected p-value(BH method)		Class	GO_Name	GO_ID	GO_Level	P_value	EnrichmentScore	HitsGenesCountsInSelectedSet	HitsGenesCountsInBackground	AllGenesCountsInSelectedSet	AllGenesCountsInBackground	GenesOfSelectedSetInGOterm	corrected p-value(BH method)
Molecular function	oxidoreductase activity	GO:0016491	3	0	1.9246	320	888	1303	6959	>LE01Gene03325,>LE01Gene05507,>LE01Gene13129,>LE01Gene05518,>LE01Gene13135,>LE01Gene01161,>LE01Gene03303,>LE01Gene12251,>LE01Gene04640,>LE01Gene00290,>LE01Gene05541,>LE01Gene06854,>LE01Gene01167,>LE01Gene14008,>LE01Gene01552,>LE01Gene00225,>LE01Gene08192,>LE01Gene08198,>LE01Gene01526,>LE01Gene00683,>LE01Gene13513,>LE01Gene11338,>LE01Gene11339,>LE01Gene00256,>LE01Gene04617,>LE01Gene05946,>LE01Gene…	0		Molecular function	carbohydrate derivative binding	GO:0097367	3	4.2551e-11	1.56756	177	876	897	6959	>LE01Gene06839,>LE01Gene06843,>LE01Gene01153,>LE01Gene03366,>LE01Gene03365,>LE01Gene05546,>LE01Gene02038,>LE01Gene06400,>LE01Gene02017,>LE01Gene03345,>LE01Gene01183,>LE01Gene01184,>LE01Gene14838,>LE01Gene12662,>LE01Gene10059,>LE01Gene06801,>LE01Gene10066,>LE01Gene10065,>LE01Gene02413,>LE01Gene01563,>LE01Gene10030,>LE01Gene11371,>LE01Gene09434,>LE01Gene09895,>LE01Gene08568,>LE01Gene08571,>LE01Gene…	2.85517e-08
Molecular function	hydrolase activity, acting on glycosyl bonds	GO:0016798	4	0	2.49235	98	210	1303	6959	>LE01Gene14459,>LE01Gene05961,>LE01Gene06823,>LE01Gene04647,>LE01Gene03370,>LE01Gene01164,>LE01Gene12203,>LE01Gene04612,>LE01Gene05940,>LE01Gene02438,>LE01Gene12231,>LE01Gene02894,>LE01Gene10050,>LE01Gene05074,>LE01Gene05083,>LE01Gene05084,>LE01Gene11720,>LE01Gene11318,>LE01Gene13979,>LE01Gene05090,>LE01Gene10432,>LE01Gene07273,>LE01Gene09459,>LE01Gene08136,>LE01Gene11778,>LE01Gene06326,>LE01Gene…	0		Molecular function	purine ribonucleotide binding	GO:0032555	7	4.73681e-11	1.58946	168	820	897	6959	>LE01Gene06839,>LE01Gene06843,>LE01Gene01153,>LE01Gene03366,>LE01Gene03365,>LE01Gene05546,>LE01Gene02038,>LE01Gene06400,>LE01Gene02017,>LE01Gene03345,>LE01Gene01183,>LE01Gene01184,>LE01Gene14838,>LE01Gene12662,>LE01Gene10059,>LE01Gene06801,>LE01Gene10066,>LE01Gene10065,>LE01Gene02413,>LE01Gene01563,>LE01Gene10030,>LE01Gene11371,>LE01Gene09895,>LE01Gene08568,>LE01Gene08571,>LE01Gene01983,>LE01Gene…	1.5892e-08
Molecular function	hydrolase activity, hydrolyzing O-glycosyl compounds	GO:0004553	5	0	2.54961	95	199	1303	6959	>LE01Gene05961,>LE01Gene06823,>LE01Gene04647,>LE01Gene03370,>LE01Gene01164,>LE01Gene12203,>LE01Gene04612,>LE01Gene05940,>LE01Gene02438,>LE01Gene12231,>LE01Gene02894,>LE01Gene10050,>LE01Gene05074,>LE01Gene05083,>LE01Gene05084,>LE01Gene11318,>LE01Gene13979,>LE01Gene05090,>LE01Gene10432,>LE01Gene07273,>LE01Gene09459,>LE01Gene08136,>LE01Gene11778,>LE01Gene06326,>LE01Gene07656,>LE01Gene06300,>LE01Gene…	0		Molecular function	purine ribonucleoside triphosphate binding	GO:0035639	5	4.89088e-11	1.59165	167	814	897	6959	>LE01Gene06839,>LE01Gene06843,>LE01Gene01153,>LE01Gene03366,>LE01Gene03365,>LE01Gene05546,>LE01Gene02038,>LE01Gene06400,>LE01Gene02017,>LE01Gene03345,>LE01Gene01183,>LE01Gene01184,>LE01Gene14838,>LE01Gene12662,>LE01Gene10059,>LE01Gene06801,>LE01Gene10066,>LE01Gene10065,>LE01Gene02413,>LE01Gene01563,>LE01Gene10030,>LE01Gene11371,>LE01Gene09895,>LE01Gene08568,>LE01Gene08571,>LE01Gene01983,>LE01Gene…	1.09393e-08
Molecular function	catalytic activity	GO:0003824	2	0	1.3969	1013	3873	1303	6959	>LE01Gene04653,>LE01Gene04657,>LE01Gene03325,>LE01Gene04654,>LE01Gene05509,>LE01Gene03327,>LE01Gene05507,>LE01Gene14458,>LE01Gene13129,>LE01Gene14459,>LE01Gene01150,>LE01Gene06846,>LE01Gene05516,>LE01Gene06847,>LE01Gene05518,>LE01Gene13132,>LE01Gene13135,>LE01Gene01161,>LE01Gene02451,>LE01Gene02456,>LE01Gene03303,>LE01Gene05961,>LE01Gene06818,>LE01Gene12251,>LE01Gene12252,>LE01Gene12253,>LE01Gene…	0		Molecular function	purine nucleotide binding	GO:0017076	6	4.92126e-11	1.58328	170	833	897	6959	>LE01Gene06839,>LE01Gene06843,>LE01Gene01153,>LE01Gene03366,>LE01Gene03365,>LE01Gene05546,>LE01Gene02038,>LE01Gene06400,>LE01Gene02017,>LE01Gene03345,>LE01Gene01183,>LE01Gene01184,>LE01Gene14838,>LE01Gene12662,>LE01Gene10059,>LE01Gene06801,>LE01Gene10066,>LE01Gene10065,>LE01Gene02413,>LE01Gene01563,>LE01Gene10030,>LE01Gene11371,>LE01Gene09895,>LE01Gene08568,>LE01Gene08571,>LE01Gene01983,>LE01Gene…	8.25542e-09
Molecular function	oxidoreductase activity, acting on paired donors, with incorporation or reduction of molecular oxygen	GO:0016705	4	1.31006e-14	2.23196	84	201	1303	6959	>LE01Gene05507,>LE01Gene13135,>LE01Gene01161,>LE01Gene04640,>LE01Gene08192,>LE01Gene11338,>LE01Gene04617,>LE01Gene11374,>LE01Gene05087,>LE01Gene05088,>LE01Gene05089,>LE01Gene09419,>LE01Gene13914,>LE01Gene11316,>LE01Gene09446,>LE01Gene06359,>LE01Gene06358,>LE01Gene11705,>LE01Gene05865,>LE01Gene06713,>LE01Gene05862,>LE01Gene01012,>LE01Gene05855,>LE01Gene04526,>LE01Gene07610,>LE01Gene13413,>LE01Gene…	1.84981e-12		Molecular function	anion binding	GO:0043168	4	5.96818e-11	1.49781	206	1067	897	6959	>LE01Gene00296,>LE01Gene06839,>LE01Gene06843,>LE01Gene01153,>LE01Gene03315,>LE01Gene03366,>LE01Gene03365,>LE01Gene05546,>LE01Gene02038,>LE01Gene06400,>LE01Gene02017,>LE01Gene03345,>LE01Gene06866,>LE01Gene01183,>LE01Gene01184,>LE01Gene02875,>LE01Gene14838,>LE01Gene12662,>LE01Gene10059,>LE01Gene06801,>LE01Gene10066,>LE01Gene10065,>LE01Gene02413,>LE01Gene01563,>LE01Gene10030,>LE01Gene11371,>LE01Gene…	8.0093e-09
Molecular function	obsolete cofactor binding	GO:0048037	0	4.16112e-13	1.67942	161	512	1303	6959	>LE01Gene03325,>LE01Gene05507,>LE01Gene13129,>LE01Gene13135,>LE01Gene01161,>LE01Gene04649,>LE01Gene12266,>LE01Gene07739,>LE01Gene06854,>LE01Gene04205,>LE01Gene14008,>LE01Gene08192,>LE01Gene13513,>LE01Gene00256,>LE01Gene04617,>LE01Gene12238,>LE01Gene02448,>LE01Gene02892,>LE01Gene09060,>LE01Gene11374,>LE01Gene00628,>LE01Gene05087,>LE01Gene05088,>LE01Gene05089,>LE01Gene11722,>LE01Gene09419,>LE01Gene…	4.89625e-11		Molecular function	ribonucleotide binding	GO:0032553	6	1.81361e-10	1.55162	173	865	897	6959	>LE01Gene06839,>LE01Gene06843,>LE01Gene01153,>LE01Gene03366,>LE01Gene03365,>LE01Gene05546,>LE01Gene02038,>LE01Gene06400,>LE01Gene02017,>LE01Gene03345,>LE01Gene01183,>LE01Gene01184,>LE01Gene14838,>LE01Gene12662,>LE01Gene10059,>LE01Gene06801,>LE01Gene10066,>LE01Gene10065,>LE01Gene02413,>LE01Gene01563,>LE01Gene10030,>LE01Gene11371,>LE01Gene09434,>LE01Gene09895,>LE01Gene08568,>LE01Gene08571,>LE01Gene…	2.02822e-08
Molecular function	hydrolase activity	GO:0016787	3	2.07437e-11	1.34095	349	1390	1303	6959	>LE01Gene14459,>LE01Gene01150,>LE01Gene06847,>LE01Gene05961,>LE01Gene06818,>LE01Gene12252,>LE01Gene12253,>LE01Gene02460,>LE01Gene06823,>LE01Gene05977,>LE01Gene05973,>LE01Gene04647,>LE01Gene04218,>LE01Gene03370,>LE01Gene06888,>LE01Gene03376,>LE01Gene07739,>LE01Gene01164,>LE01Gene06858,>LE01Gene04689,>LE01Gene02025,>LE01Gene10024,>LE01Gene00228,>LE01Gene12203,>LE01Gene02852,>LE01Gene02854,>LE01Gene…	2.09215e-09		Molecular function	catalytic activity	GO:0003824	2	1.8148e-10	1.17383	586	3873	897	6959	>LE01Gene06839,>LE01Gene13124,>LE01Gene04660,>LE01Gene02482,>LE01Gene06843,>LE01Gene01152,>LE01Gene01153,>LE01Gene05510,>LE01Gene02493,>LE01Gene01123,>LE01Gene14433,>LE01Gene12259,>LE01Gene03315,>LE01Gene00289,>LE01Gene01135,>LE01Gene12270,>LE01Gene12267,>LE01Gene03366,>LE01Gene03365,>LE01Gene05546,>LE01Gene02037,>LE01Gene14011,>LE01Gene01193,>LE01Gene04224,>LE01Gene06893,>LE01Gene02494,>LE01Gene…	1.73961e-08
Molecular function	iron ion binding	GO:0005506	7	5.25358e-10	2.02083	70	185	1303	6959	>LE01Gene05507,>LE01Gene13135,>LE01Gene01161,>LE01Gene08192,>LE01Gene04617,>LE01Gene11374,>LE01Gene05087,>LE01Gene05088,>LE01Gene05089,>LE01Gene09419,>LE01Gene11316,>LE01Gene09446,>LE01Gene04116,>LE01Gene06359,>LE01Gene06358,>LE01Gene05865,>LE01Gene05862,>LE01Gene05855,>LE01Gene04526,>LE01Gene07610,>LE01Gene13413,>LE01Gene02731,>LE01Gene00558,>LE01Gene00557,>LE01Gene11694,>LE01Gene12580,>LE01Gene…	4.63628e-08		Molecular function	obsolete drug binding	GO:0008144	0	6.44852e-10	1.57826	154	757	897	6959	>LE01Gene06839,>LE01Gene06843,>LE01Gene01153,>LE01Gene03366,>LE01Gene05546,>LE01Gene02038,>LE01Gene06400,>LE01Gene02017,>LE01Gene02019,>LE01Gene06866,>LE01Gene01183,>LE01Gene01184,>LE01Gene02875,>LE01Gene14838,>LE01Gene12662,>LE01Gene10059,>LE01Gene06801,>LE01Gene10066,>LE01Gene10065,>LE01Gene02413,>LE01Gene01563,>LE01Gene11371,>LE01Gene08568,>LE01Gene08571,>LE01Gene01983,>LE01Gene11302,>LE01Gene…	5.4087e-08
Molecular function	lyase activity	GO:0016829	3	1.66374e-09	2.25106	51	121	1303	6959	>LE01Gene04653,>LE01Gene04654,>LE01Gene05509,>LE01Gene04205,>LE01Gene13156,>LE01Gene00228,>LE01Gene08193,>LE01Gene12687,>LE01Gene02448,>LE01Gene01984,>LE01Gene01988,>LE01Gene10457,>LE01Gene10460,>LE01Gene08127,>LE01Gene04142,>LE01Gene07630,>LE01Gene07632,>LE01Gene01907,>LE01Gene12136,>LE01Gene12537,>LE01Gene02780,>LE01Gene04966,>LE01Gene09791,>LE01Gene00950,>LE01Gene04902,>LE01Gene12986,>LE01Gene…	1.30511e-07		Molecular function	nucleotide binding	GO:0000166	5	9.99868e-10	1.43717	216	1166	897	6959	>LE01Gene06839,>LE01Gene06843,>LE01Gene01153,>LE01Gene03315,>LE01Gene12270,>LE01Gene03366,>LE01Gene03365,>LE01Gene05546,>LE01Gene02038,>LE01Gene06400,>LE01Gene02017,>LE01Gene03345,>LE01Gene01183,>LE01Gene01184,>LE01Gene01549,>LE01Gene14838,>LE01Gene12662,>LE01Gene10059,>LE01Gene06801,>LE01Gene10066,>LE01Gene10065,>LE01Gene02413,>LE01Gene01563,>LE01Gene10030,>LE01Gene01574,>LE01Gene10048,>LE01Gene…	7.45457e-08
Molecular function	heme binding	GO:0020037	5	3.18737e-09	1.96017	69	188	1303	6959	>LE01Gene05507,>LE01Gene13135,>LE01Gene01161,>LE01Gene08192,>LE01Gene04617,>LE01Gene09060,>LE01Gene11374,>LE01Gene05087,>LE01Gene05088,>LE01Gene05089,>LE01Gene09419,>LE01Gene11316,>LE01Gene09446,>LE01Gene06359,>LE01Gene06358,>LE01Gene04157,>LE01Gene08997,>LE01Gene04526,>LE01Gene13413,>LE01Gene02731,>LE01Gene00558,>LE01Gene00557,>LE01Gene12580,>LE01Gene00976,>LE01Gene10784,>LE01Gene00534,>LE01Gene…	2.25029e-07		Molecular function	nucleoside phosphate binding	GO:1901265	4	9.99868e-10	1.43717	216	1166	897	6959	>LE01Gene06839,>LE01Gene06843,>LE01Gene01153,>LE01Gene03315,>LE01Gene12270,>LE01Gene03366,>LE01Gene03365,>LE01Gene05546,>LE01Gene02038,>LE01Gene06400,>LE01Gene02017,>LE01Gene03345,>LE01Gene01183,>LE01Gene01184,>LE01Gene01549,>LE01Gene14838,>LE01Gene12662,>LE01Gene10059,>LE01Gene06801,>LE01Gene10066,>LE01Gene10065,>LE01Gene02413,>LE01Gene01563,>LE01Gene10030,>LE01Gene01574,>LE01Gene10048,>LE01Gene…	7.45457e-08
Molecular function	tetrapyrrole binding	GO:0046906	4	3.18737e-09	1.96017	69	188	1303	6959	>LE01Gene05507,>LE01Gene13135,>LE01Gene01161,>LE01Gene08192,>LE01Gene04617,>LE01Gene09060,>LE01Gene11374,>LE01Gene05087,>LE01Gene05088,>LE01Gene05089,>LE01Gene09419,>LE01Gene11316,>LE01Gene09446,>LE01Gene06359,>LE01Gene06358,>LE01Gene04157,>LE01Gene08997,>LE01Gene04526,>LE01Gene13413,>LE01Gene02731,>LE01Gene00558,>LE01Gene00557,>LE01Gene12580,>LE01Gene00976,>LE01Gene10784,>LE01Gene00534,>LE01Gene…	2.25029e-07		Molecular function	adenyl nucleotide binding	GO:0030554	7	1.00417e-09	1.59308	146	711	897	6959	>LE01Gene06839,>LE01Gene06843,>LE01Gene01153,>LE01Gene03366,>LE01Gene05546,>LE01Gene02038,>LE01Gene06400,>LE01Gene02017,>LE01Gene01183,>LE01Gene01184,>LE01Gene14838,>LE01Gene12662,>LE01Gene10059,>LE01Gene06801,>LE01Gene10066,>LE01Gene10065,>LE01Gene02413,>LE01Gene01563,>LE01Gene11371,>LE01Gene08568,>LE01Gene08571,>LE01Gene01983,>LE01Gene02814,>LE01Gene12618,>LE01Gene11776,>LE01Gene06315,>LE01Gene…	6.12546e-08
Molecular function	carbohydrate binding	GO:0030246	3	4.80771e-09	2.71146	33	65	1303	6959	>LE01Gene03370,>LE01Gene02438,>LE01Gene10050,>LE01Gene07273,>LE01Gene04186,>LE01Gene04104,>LE01Gene03223,>LE01Gene11685,>LE01Gene08044,>LE01Gene11268,>LE01Gene10302,>LE01Gene03184,>LE01Gene04001,>LE01Gene07926,>LE01Gene06603,>LE01Gene00068,>LE01Gene12496,>LE01Gene02639,>LE01Gene04829,>LE01Gene09249,>LE01Gene09248,>LE01Gene13789,>LE01Gene10634,>LE01Gene01726,>LE01Gene09210,>LE01Gene12864,>LE01Gene…	2.82854e-07		Molecular function	small molecule binding	GO:0036094	3	1.10088e-09	1.41734	228	1248	897	6959	>LE01Gene06839,>LE01Gene06843,>LE01Gene01153,>LE01Gene03315,>LE01Gene12270,>LE01Gene03366,>LE01Gene03365,>LE01Gene05546,>LE01Gene02038,>LE01Gene06400,>LE01Gene02017,>LE01Gene03345,>LE01Gene06866,>LE01Gene01183,>LE01Gene01184,>LE01Gene02875,>LE01Gene01549,>LE01Gene14838,>LE01Gene12662,>LE01Gene10059,>LE01Gene06801,>LE01Gene10066,>LE01Gene10065,>LE01Gene02413,>LE01Gene01563,>LE01Gene10030,>LE01Gene…	6.15575e-08
Molecular function	dioxygenase activity	GO:0051213	4	4.37555e-07	2.53459	28	59	1303	6959	>LE01Gene04640,>LE01Gene08198,>LE01Gene11338,>LE01Gene08578,>LE01Gene13914,>LE01Gene04116,>LE01Gene05865,>LE01Gene06713,>LE01Gene05862,>LE01Gene01012,>LE01Gene05855,>LE01Gene07610,>LE01Gene11694,>LE01Gene00097,>LE01Gene02634,>LE01Gene11982,>LE01Gene00849,>LE01Gene09227,>LE01Gene01248,>LE01Gene06937,>LE01Gene05662,>LE01Gene02142,>LE01Gene11447,>LE01Gene09131,>LE01Gene00354,>LE01Gene06049,>LE01Gene…	2.37626e-05		Molecular function	adenyl ribonucleotide binding	GO:0032559	8	1.60522e-09	1.58914	144	703	897	6959	>LE01Gene06839,>LE01Gene06843,>LE01Gene01153,>LE01Gene03366,>LE01Gene05546,>LE01Gene02038,>LE01Gene06400,>LE01Gene02017,>LE01Gene01183,>LE01Gene01184,>LE01Gene14838,>LE01Gene12662,>LE01Gene10059,>LE01Gene06801,>LE01Gene10066,>LE01Gene10065,>LE01Gene02413,>LE01Gene01563,>LE01Gene11371,>LE01Gene08568,>LE01Gene08571,>LE01Gene01983,>LE01Gene02814,>LE01Gene12618,>LE01Gene11776,>LE01Gene06315,>LE01Gene…	8.28538e-08
Molecular function	cellulose binding	GO:0030248	5	4.86365e-07	3.3627	17	27	1303	6959	>LE01Gene03370,>LE01Gene10050,>LE01Gene07273,>LE01Gene04104,>LE01Gene03223,>LE01Gene11268,>LE01Gene06603,>LE01Gene12496,>LE01Gene02639,>LE01Gene04829,>LE01Gene09249,>LE01Gene09248,>LE01Gene10634,>LE01Gene12864,>LE01Gene05218,>LE01Gene11041,>LE01Gene11487,	2.45267e-05		Molecular function	ATP binding	GO:0005524	9	1.65051e-09	1.59169	143	697	897	6959	>LE01Gene06839,>LE01Gene06843,>LE01Gene01153,>LE01Gene03366,>LE01Gene05546,>LE01Gene02038,>LE01Gene06400,>LE01Gene02017,>LE01Gene01183,>LE01Gene01184,>LE01Gene14838,>LE01Gene12662,>LE01Gene10059,>LE01Gene06801,>LE01Gene10066,>LE01Gene10065,>LE01Gene02413,>LE01Gene01563,>LE01Gene11371,>LE01Gene08568,>LE01Gene08571,>LE01Gene01983,>LE01Gene02814,>LE01Gene12618,>LE01Gene11776,>LE01Gene06315,>LE01Gene…	7.91066e-08
Molecular function	polysaccharide binding	GO:0030247	4	7.42336e-07	3.07498	19	33	1303	6959	>LE01Gene03370,>LE01Gene10050,>LE01Gene07273,>LE01Gene04186,>LE01Gene04104,>LE01Gene03223,>LE01Gene11268,>LE01Gene06603,>LE01Gene12496,>LE01Gene02639,>LE01Gene04829,>LE01Gene09249,>LE01Gene09248,>LE01Gene10634,>LE01Gene12864,>LE01Gene05218,>LE01Gene11041,>LE01Gene11487,>LE01Gene09188,	3.49393e-05		Molecular function	structural molecule activity	GO:0005198	2	2.46149e-09	2.44433	46	146	897	6959	>LE01Gene03323,>LE01Gene14438,>LE01Gene13539,>LE01Gene13506,>LE01Gene00242,>LE01Gene01578,>LE01Gene13552,>LE01Gene13972,>LE01Gene01960,>LE01Gene10826,>LE01Gene09867,>LE01Gene05494,>LE01Gene05499,>LE01Gene00183,>LE01Gene05411,>LE01Gene08921,>LE01Gene01434,>LE01Gene01435,>LE01Gene00147,>LE01Gene11242,>LE01Gene10309,>LE01Gene00960,>LE01Gene08487,>LE01Gene02296,>LE01Gene00911,>LE01Gene08401,>LE01Gene…	1.1011e-07
Molecular function	obsolete pattern binding	GO:0001871	0	7.42336e-07	3.07498	19	33	1303	6959	>LE01Gene03370,>LE01Gene10050,>LE01Gene07273,>LE01Gene04186,>LE01Gene04104,>LE01Gene03223,>LE01Gene11268,>LE01Gene06603,>LE01Gene12496,>LE01Gene02639,>LE01Gene04829,>LE01Gene09249,>LE01Gene09248,>LE01Gene10634,>LE01Gene12864,>LE01Gene05218,>LE01Gene11041,>LE01Gene11487,>LE01Gene09188,	3.49393e-05		Molecular function	electron transfer activity	GO:0009055	4	5.63355e-08	3.77958	19	39	897	6959	>LE01Gene12240,>LE01Gene01912,>LE01Gene09851,>LE01Gene05850,>LE01Gene01076,>LE01Gene08075,>LE01Gene10319,>LE01Gene08432,>LE01Gene03544,>LE01Gene05778,>LE01Gene02208,>LE01Gene06179,>LE01Gene10683,>LE01Gene02186,>LE01Gene05255,>LE01Gene13274,>LE01Gene08280,>LE01Gene02945,>LE01Gene04234,	2.36257e-06
Molecular function	obsolete coenzyme binding	GO:0050662	0	7.43703e-07	1.62463	87	286	1303	6959	>LE01Gene13129,>LE01Gene07739,>LE01Gene04205,>LE01Gene14008,>LE01Gene13513,>LE01Gene00256,>LE01Gene12238,>LE01Gene02448,>LE01Gene02892,>LE01Gene00628,>LE01Gene11722,>LE01Gene01966,>LE01Gene03297,>LE01Gene07621,>LE01Gene08952,>LE01Gene13084,>LE01Gene11707,>LE01Gene11705,>LE01Gene10868,>LE01Gene04157,>LE01Gene12136,>LE01Gene06745,>LE01Gene01404,>LE01Gene12537,>LE01Gene10785,>LE01Gene10788,>LE01Gene…	3.08856e-05		Molecular function	proton transmembrane transporter activity	GO:0015078	7	4.11286e-07	3.30131	20	47	897	6959	>LE01Gene12240,>LE01Gene12697,>LE01Gene06352,>LE01Gene13008,>LE01Gene05850,>LE01Gene04586,>LE01Gene01076,>LE01Gene08075,>LE01Gene01885,>LE01Gene14307,>LE01Gene03585,>LE01Gene06610,>LE01Gene01780,>LE01Gene10225,>LE01Gene03934,>LE01Gene06179,>LE01Gene03007,>LE01Gene08280,>LE01Gene09140,>LE01Gene04234,	1.62337e-05
Molecular function	oxidoreductase activity, acting on CH-OH group of donors	GO:0016614	4	2.27288e-06	2.03457	40	105	1303	6959	>LE01Gene00256,>LE01Gene01966,>LE01Gene05481,>LE01Gene07621,>LE01Gene08952,>LE01Gene04182,>LE01Gene10868,>LE01Gene06745,>LE01Gene10788,>LE01Gene07108,>LE01Gene07124,>LE01Gene04010,>LE01Gene04060,>LE01Gene03564,>LE01Gene00046,>LE01Gene00047,>LE01Gene09272,>LE01Gene13764,>LE01Gene04820,>LE01Gene00015,>LE01Gene02678,>LE01Gene04836,>LE01Gene08342,>LE01Gene10632,>LE01Gene02144,>LE01Gene02143,>LE01Gene…	8.91473e-05		Molecular function	primary active transmembrane transporter activity	GO:0015399	5	4.60501e-07	2.6161	29	86	897	6959	>LE01Gene01153,>LE01Gene14838,>LE01Gene12240,>LE01Gene08571,>LE01Gene12618,>LE01Gene09851,>LE01Gene13008,>LE01Gene05850,>LE01Gene01076,>LE01Gene08917,>LE01Gene08075,>LE01Gene01885,>LE01Gene08419,>LE01Gene08432,>LE01Gene03585,>LE01Gene06610,>LE01Gene05778,>LE01Gene01780,>LE01Gene06179,>LE01Gene01735,>LE01Gene10683,>LE01Gene02186,>LE01Gene08779,>LE01Gene03007,>LE01Gene09163,>LE01Gene08280,>LE01Gene…	1.71665e-05
Molecular function	hydrolase activity, acting on carbon-nitrogen (but not peptide) bonds	GO:0016810	4	5.96796e-06	2.24466	29	69	1303	6959	>LE01Gene06818,>LE01Gene07739,>LE01Gene09080,>LE01Gene00247,>LE01Gene06389,>LE01Gene10881,>LE01Gene10882,>LE01Gene00645,>LE01Gene05870,>LE01Gene06726,>LE01Gene05436,>LE01Gene04567,>LE01Gene05800,>LE01Gene00116,>LE01Gene05356,>LE01Gene05330,>LE01Gene02230,>LE01Gene12490,>LE01Gene12831,>LE01Gene11524,>LE01Gene01736,>LE01Gene07896,>LE01Gene06587,>LE01Gene06514,>LE01Gene06517,>LE01Gene12328,>LE01Gene…	0.000221757		Molecular function	hydrolase activity, acting on acid anhydrides	GO:0016817	4	6.60923e-07	1.73969	74	330	897	6959	>LE01Gene01153,>LE01Gene03366,>LE01Gene03365,>LE01Gene05546,>LE01Gene02017,>LE01Gene14838,>LE01Gene10059,>LE01Gene06801,>LE01Gene10066,>LE01Gene02413,>LE01Gene10030,>LE01Gene00240,>LE01Gene09895,>LE01Gene08568,>LE01Gene08571,>LE01Gene08138,>LE01Gene12618,>LE01Gene05464,>LE01Gene09851,>LE01Gene08526,>LE01Gene13008,>LE01Gene02350,>LE01Gene05437,>LE01Gene06736,>LE01Gene08917,>LE01Gene12186,>LE01Gene…	2.3341e-05
Molecular function	2-oxoglutarate-dependent dioxygenase activity	GO:0016706	5	1.26204e-05	2.74667	18	35	1303	6959	>LE01Gene04640,>LE01Gene11338,>LE01Gene13914,>LE01Gene05865,>LE01Gene06713,>LE01Gene05862,>LE01Gene01012,>LE01Gene05855,>LE01Gene07610,>LE01Gene11694,>LE01Gene00849,>LE01Gene06937,>LE01Gene05662,>LE01Gene11447,>LE01Gene09131,>LE01Gene00354,>LE01Gene06049,>LE01Gene06464,	0.000445501		Molecular function	oxidoreduction-driven active transmembrane transporter activity	GO:0015453	6	9.15604e-07	4.65485	12	20	897	6959	>LE01Gene12240,>LE01Gene09851,>LE01Gene05850,>LE01Gene01076,>LE01Gene08075,>LE01Gene08432,>LE01Gene05778,>LE01Gene06179,>LE01Gene10683,>LE01Gene02186,>LE01Gene08280,>LE01Gene04234,	3.07185e-05
Molecular function	ligase activity, forming carbon-nitrogen bonds	GO:0016879	4	1.61335e-05	2.21847	27	65	1303	6959	>LE01Gene12269,>LE01Gene01586,>LE01Gene05082,>LE01Gene13915,>LE01Gene00650,>LE01Gene07671,>LE01Gene01054,>LE01Gene01407,>LE01Gene07121,>LE01Gene07123,>LE01Gene07172,>LE01Gene04905,>LE01Gene09327,>LE01Gene07156,>LE01Gene05356,>LE01Gene07910,>LE01Gene05302,>LE01Gene07980,>LE01Gene00453,>LE01Gene10267,>LE01Gene00447,>LE01Gene11906,>LE01Gene07875,>LE01Gene06939,>LE01Gene10195,>LE01Gene00353,>LE01Gene…	0.000542392		Molecular function	hydrolase activity, acting on acid anhydrides, in phosphorus-containing anhydrides	GO:0016818	5	2.18365e-06	1.70299	72	328	897	6959	>LE01Gene01153,>LE01Gene03366,>LE01Gene03365,>LE01Gene05546,>LE01Gene02017,>LE01Gene14838,>LE01Gene10059,>LE01Gene06801,>LE01Gene10066,>LE01Gene02413,>LE01Gene10030,>LE01Gene00240,>LE01Gene09895,>LE01Gene08568,>LE01Gene08571,>LE01Gene08138,>LE01Gene12618,>LE01Gene05464,>LE01Gene08526,>LE01Gene13008,>LE01Gene02350,>LE01Gene05437,>LE01Gene06736,>LE01Gene08917,>LE01Gene12186,>LE01Gene08065,>LE01Gene…	6.9773e-05
Molecular function	serine-type carboxypeptidase activity	GO:0004185	7	2.46101e-05	3.81482	10	14	1303	6959	>LE01Gene09473,>LE01Gene04165,>LE01Gene05410,>LE01Gene05823,>LE01Gene08460,>LE01Gene06260,>LE01Gene07031,>LE01Gene10154,>LE01Gene11807,>LE01Gene07312,	0.000789761		Molecular function	ribonucleoside triphosphate phosphatase activity	GO:0017111	7	2.73525e-06	1.70775	70	318	897	6959	>LE01Gene01153,>LE01Gene03366,>LE01Gene03365,>LE01Gene05546,>LE01Gene14838,>LE01Gene10059,>LE01Gene06801,>LE01Gene10066,>LE01Gene02413,>LE01Gene10030,>LE01Gene00240,>LE01Gene09895,>LE01Gene08568,>LE01Gene08571,>LE01Gene08138,>LE01Gene12618,>LE01Gene08526,>LE01Gene13008,>LE01Gene02350,>LE01Gene05437,>LE01Gene06736,>LE01Gene08917,>LE01Gene12186,>LE01Gene08065,>LE01Gene01434,>LE01Gene01435,>LE01Gene…	8.34251e-05
Molecular function	carboxypeptidase activity	GO:0004180	6	5.01421e-05	3.20445	12	20	1303	6959	>LE01Gene02852,>LE01Gene09473,>LE01Gene04165,>LE01Gene05870,>LE01Gene05410,>LE01Gene05823,>LE01Gene08460,>LE01Gene06260,>LE01Gene07031,>LE01Gene10154,>LE01Gene11807,>LE01Gene07312,	0.00153914		Molecular function	pyrophosphatase activity	GO:0016462	6	2.75125e-06	1.70007	71	324	897	6959	>LE01Gene01153,>LE01Gene03366,>LE01Gene03365,>LE01Gene05546,>LE01Gene14838,>LE01Gene10059,>LE01Gene06801,>LE01Gene10066,>LE01Gene02413,>LE01Gene10030,>LE01Gene00240,>LE01Gene09895,>LE01Gene08568,>LE01Gene08571,>LE01Gene08138,>LE01Gene12618,>LE01Gene05464,>LE01Gene08526,>LE01Gene13008,>LE01Gene02350,>LE01Gene05437,>LE01Gene06736,>LE01Gene08917,>LE01Gene12186,>LE01Gene08065,>LE01Gene01434,>LE01Gene…	8.02649e-05
Molecular function	pentosyltransferase activity	GO:0016763	5	5.76032e-05	3.01869	13	23	1303	6959	>LE01Gene13132,>LE01Gene06881,>LE01Gene13510,>LE01Gene02893,>LE01Gene01422,>LE01Gene11247,>LE01Gene11248,>LE01Gene10334,>LE01Gene12908,>LE01Gene02239,>LE01Gene03859,>LE01Gene09114,>LE01Gene07329,	0.00169449		Molecular function	ATP-dependent activity	GO:0140657	2	8.42323e-06	1.78533	55	239	897	6959	>LE01Gene01153,>LE01Gene03366,>LE01Gene05546,>LE01Gene14838,>LE01Gene10059,>LE01Gene06801,>LE01Gene10066,>LE01Gene02413,>LE01Gene00240,>LE01Gene08568,>LE01Gene08571,>LE01Gene12618,>LE01Gene08526,>LE01Gene13008,>LE01Gene02350,>LE01Gene05437,>LE01Gene06736,>LE01Gene08917,>LE01Gene12186,>LE01Gene08065,>LE01Gene01885,>LE01Gene11633,>LE01Gene00959,>LE01Gene11651,>LE01Gene12981,>LE01Gene03179,>LE01Gene…	0.000235499
Molecular function	serine-type exopeptidase activity	GO:0070008	6	6.14236e-05	3.5605	10	15	1303	6959	>LE01Gene09473,>LE01Gene04165,>LE01Gene05410,>LE01Gene05823,>LE01Gene08460,>LE01Gene06260,>LE01Gene07031,>LE01Gene10154,>LE01Gene11807,>LE01Gene07312,	0.0017346		Molecular function	active transmembrane transporter activity	GO:0022804	4	1.10333e-05	2.20643	31	109	897	6959	>LE01Gene01153,>LE01Gene14838,>LE01Gene12240,>LE01Gene12697,>LE01Gene08571,>LE01Gene12618,>LE01Gene06355,>LE01Gene09851,>LE01Gene13008,>LE01Gene05850,>LE01Gene01076,>LE01Gene08917,>LE01Gene08075,>LE01Gene01885,>LE01Gene08419,>LE01Gene08432,>LE01Gene03585,>LE01Gene06610,>LE01Gene05778,>LE01Gene01780,>LE01Gene06179,>LE01Gene01735,>LE01Gene10683,>LE01Gene02186,>LE01Gene08779,>LE01Gene03007,>LE01Gene…	0.000296133
Molecular function	oxidoreductase activity, acting on the CH-OH group of donors, NAD or NADP as acceptor	GO:0016616	5	7.05907e-05	2.01145	29	77	1303	6959	>LE01Gene00256,>LE01Gene01966,>LE01Gene05481,>LE01Gene08952,>LE01Gene04182,>LE01Gene06745,>LE01Gene10788,>LE01Gene07108,>LE01Gene07124,>LE01Gene04060,>LE01Gene03564,>LE01Gene00046,>LE01Gene00047,>LE01Gene09272,>LE01Gene00015,>LE01Gene10632,>LE01Gene02144,>LE01Gene02143,>LE01Gene00332,>LE01Gene12309,>LE01Gene03875,>LE01Gene03873,>LE01Gene09184,>LE01Gene08676,>LE01Gene10999,>LE01Gene01623,>LE01Gene…	0.00191681		Molecular function	proton-transporting ATP synthase activity, rotational mechanism	GO:0046933	9	2.81643e-05	6.64978	6	7	897	6959	>LE01Gene13008,>LE01Gene01885,>LE01Gene03585,>LE01Gene06610,>LE01Gene01780,>LE01Gene03007,	0.000726856
Molecular function	carbon-carbon lyase activity	GO:0016830	4	8.09224e-05	2.46496	18	39	1303	6959	>LE01Gene05509,>LE01Gene04205,>LE01Gene02448,>LE01Gene08127,>LE01Gene07630,>LE01Gene07632,>LE01Gene12136,>LE01Gene12537,>LE01Gene02780,>LE01Gene00950,>LE01Gene04902,>LE01Gene11106,>LE01Gene06597,>LE01Gene13255,>LE01Gene06989,>LE01Gene11499,>LE01Gene11894,>LE01Gene04296,	0.00211597		Molecular function	proton channel activity	GO:0015252	8	2.81643e-05	6.64978	6	7	897	6959	>LE01Gene13008,>LE01Gene01885,>LE01Gene03585,>LE01Gene06610,>LE01Gene01780,>LE01Gene03007,	0.000726856
Molecular function	carboxy-lyase activity	GO:0016831	5	0.000104236	2.89291	13	24	1303	6959	>LE01Gene05509,>LE01Gene04205,>LE01Gene02448,>LE01Gene07630,>LE01Gene07632,>LE01Gene12136,>LE01Gene12537,>LE01Gene02780,>LE01Gene00950,>LE01Gene13255,>LE01Gene06989,>LE01Gene11499,>LE01Gene11894,	0.00262825		Molecular function	transferase activity	GO:0016740	3	7.46563e-05	1.27716	188	1142	897	6959	>LE01Gene02482,>LE01Gene14433,>LE01Gene01135,>LE01Gene12270,>LE01Gene01193,>LE01Gene02494,>LE01Gene13145,>LE01Gene06866,>LE01Gene14484,>LE01Gene01183,>LE01Gene01184,>LE01Gene02875,>LE01Gene01541,>LE01Gene00216,>LE01Gene00674,>LE01Gene13988,>LE01Gene12662,>LE01Gene01107,>LE01Gene10065,>LE01Gene11360,>LE01Gene11362,>LE01Gene11371,>LE01Gene00613,>LE01Gene09436,>LE01Gene08573,>LE01Gene10887,>LE01Gene…	0.00178909
Molecular function	monooxygenase activity	GO:0004497	4	0.000135113	1.90303	31	87	1303	6959	>LE01Gene05507,>LE01Gene13135,>LE01Gene04617,>LE01Gene00261,>LE01Gene05087,>LE01Gene05088,>LE01Gene05089,>LE01Gene13969,>LE01Gene11316,>LE01Gene05095,>LE01Gene11705,>LE01Gene13413,>LE01Gene00558,>LE01Gene00976,>LE01Gene10784,>LE01Gene04416,>LE01Gene13761,>LE01Gene13763,>LE01Gene10245,>LE01Gene12421,>LE01Gene01347,>LE01Gene09213,>LE01Gene09224,>LE01Gene05229,>LE01Gene11953,>LE01Gene05668,>LE01Gene…	0.00328931		Molecular function	tubulin binding	GO:0015631	5	8.71536e-05	4.10722	9	17	897	6959	>LE01Gene05546,>LE01Gene05437,>LE01Gene12981,>LE01Gene03108,>LE01Gene00089,>LE01Gene03433,>LE01Gene09135,>LE01Gene00755,>LE01Gene00757,	0.00201655
Molecular function	oxidoreductase activity, acting on peroxide as acceptor	GO:0016684	4	0.000136618	2.45386	17	37	1303	6959	>LE01Gene01167,>LE01Gene09060,>LE01Gene10877,>LE01Gene10879,>LE01Gene08997,>LE01Gene08061,>LE01Gene01844,>LE01Gene04499,>LE01Gene03530,>LE01Gene10614,>LE01Gene02143,>LE01Gene12747,>LE01Gene04245,>LE01Gene08669,>LE01Gene06488,>LE01Gene08639,>LE01Gene10965,	0.00321507		Molecular function	microtubule binding	GO:0008017	6	8.71536e-05	4.10722	9	17	897	6959	>LE01Gene05546,>LE01Gene05437,>LE01Gene12981,>LE01Gene03108,>LE01Gene00089,>LE01Gene03433,>LE01Gene09135,>LE01Gene00755,>LE01Gene00757,	0.00201655
Molecular function	peroxidase activity	GO:0004601	5	0.000136618	2.45386	17	37	1303	6959	>LE01Gene01167,>LE01Gene09060,>LE01Gene10877,>LE01Gene10879,>LE01Gene08997,>LE01Gene08061,>LE01Gene01844,>LE01Gene04499,>LE01Gene03530,>LE01Gene10614,>LE01Gene02143,>LE01Gene12747,>LE01Gene04245,>LE01Gene08669,>LE01Gene06488,>LE01Gene08639,>LE01Gene10965,	0.00321507		Molecular function	structural constituent of ribosome	GO:0003735	3	0.000108262	2.0064	30	116	897	6959	>LE01Gene03323,>LE01Gene14438,>LE01Gene00242,>LE01Gene01578,>LE01Gene01960,>LE01Gene09867,>LE01Gene05494,>LE01Gene05499,>LE01Gene05411,>LE01Gene08921,>LE01Gene00147,>LE01Gene11242,>LE01Gene10309,>LE01Gene00960,>LE01Gene02296,>LE01Gene00911,>LE01Gene08401,>LE01Gene03586,>LE01Gene00461,>LE01Gene13327,>LE01Gene12459,>LE01Gene11500,>LE01Gene00865,>LE01Gene07026,>LE01Gene03096,>LE01Gene05247,>LE01Gene…	0.00234336
Molecular function	galactosidase activity	GO:0015925	6	0.000142493	3.88418	8	11	1303	6959	>LE01Gene06823,>LE01Gene05074,>LE01Gene05090,>LE01Gene01844,>LE01Gene05323,>LE01Gene00068,>LE01Gene09625,>LE01Gene11927,	0.00314376		Molecular function	oxidoreductase activity	GO:0016491	3	0.000134416	1.31049	150	888	897	6959	>LE01Gene06839,>LE01Gene04660,>LE01Gene01123,>LE01Gene03315,>LE01Gene12270,>LE01Gene12267,>LE01Gene04224,>LE01Gene06893,>LE01Gene04206,>LE01Gene01549,>LE01Gene01553,>LE01Gene12235,>LE01Gene12240,>LE01Gene11394,>LE01Gene01567,>LE01Gene01574,>LE01Gene11377,>LE01Gene09065,>LE01Gene09434,>LE01Gene08137,>LE01Gene00669,>LE01Gene11314,>LE01Gene12649,>LE01Gene07270,>LE01Gene11772,>LE01Gene06312,>LE01Gene…	0.00281853
Molecular function	O-methyltransferase activity	GO:0008171	6	0.000174969	2.67038	14	28	1303	6959	>LE01Gene08162,>LE01Gene12646,>LE01Gene06703,>LE01Gene13031,>LE01Gene09304,>LE01Gene09724,>LE01Gene11180,>LE01Gene13774,>LE01Gene11541,>LE01Gene11948,>LE01Gene09181,>LE01Gene05106,>LE01Gene07779,>LE01Gene09518,	0.00374327		Molecular function	microtubule motor activity	GO:0003777	3	0.000154468	3.87904	9	18	897	6959	>LE01Gene05546,>LE01Gene05437,>LE01Gene11633,>LE01Gene12981,>LE01Gene03108,>LE01Gene00089,>LE01Gene09130,>LE01Gene00755,>LE01Gene00757,	0.00314085
Molecular function	carbon-oxygen lyase activity	GO:0016835	4	0.000204543	2.38928	17	38	1303	6959	>LE01Gene04653,>LE01Gene04654,>LE01Gene13156,>LE01Gene08193,>LE01Gene01984,>LE01Gene01988,>LE01Gene10457,>LE01Gene01907,>LE01Gene09791,>LE01Gene02677,>LE01Gene05711,>LE01Gene12832,>LE01Gene05292,>LE01Gene06537,>LE01Gene05603,>LE01Gene04720,>LE01Gene02095,	0.00424728		Molecular function	inorganic cation transmembrane transporter activity	GO:0022890	6	0.000207554	2.08551	25	93	897	6959	>LE01Gene06407,>LE01Gene12240,>LE01Gene12697,>LE01Gene12618,>LE01Gene06352,>LE01Gene13008,>LE01Gene05850,>LE01Gene04586,>LE01Gene01076,>LE01Gene08075,>LE01Gene01885,>LE01Gene14307,>LE01Gene03585,>LE01Gene06610,>LE01Gene02270,>LE01Gene01780,>LE01Gene10225,>LE01Gene03934,>LE01Gene06179,>LE01Gene03007,>LE01Gene08280,>LE01Gene09140,>LE01Gene11842,>LE01Gene05183,>LE01Gene04234,	0.00409615
Molecular function	hydro-lyase activity	GO:0016836	5	0.000478618	2.57147	13	27	1303	6959	>LE01Gene04653,>LE01Gene04654,>LE01Gene01984,>LE01Gene01988,>LE01Gene10457,>LE01Gene01907,>LE01Gene09791,>LE01Gene02677,>LE01Gene12832,>LE01Gene05292,>LE01Gene05603,>LE01Gene04720,>LE01Gene02095,	0.0096544		Molecular function	cation channel activity	GO:0005261	7	0.000253884	4.52555	7	12	897	6959	>LE01Gene06407,>LE01Gene13008,>LE01Gene01885,>LE01Gene03585,>LE01Gene06610,>LE01Gene01780,>LE01Gene03007,	0.00486733
Molecular function	deaminase activity	GO:0019239	4	0.000883798	3.00417	9	16	1303	6959	>LE01Gene06818,>LE01Gene07739,>LE01Gene00255,>LE01Gene04192,>LE01Gene04567,>LE01Gene00116,>LE01Gene03131,>LE01Gene03132,>LE01Gene09127,	0.0173323		Molecular function	ion channel activity	GO:0005216	6	0.000260133	3.67488	9	19	897	6959	>LE01Gene06407,>LE01Gene13008,>LE01Gene01885,>LE01Gene03585,>LE01Gene06610,>LE01Gene01780,>LE01Gene09688,>LE01Gene06956,>LE01Gene03007,	0.00484858
Molecular function	carbon-nitrogen ligase activity, with glutamine as amido-N-donor	GO:0016884	5	0.000908572	2.81092	10	19	1303	6959	>LE01Gene01054,>LE01Gene07172,>LE01Gene04905,>LE01Gene07156,>LE01Gene05356,>LE01Gene07910,>LE01Gene05302,>LE01Gene00447,>LE01Gene06939,>LE01Gene10195,	0.0173365		Molecular function	transporter activity	GO:0005215	2	0.000337492	1.51377	64	328	897	6959	>LE01Gene01153,>LE01Gene06407,>LE01Gene14838,>LE01Gene00254,>LE01Gene12240,>LE01Gene12249,>LE01Gene12697,>LE01Gene05076,>LE01Gene13912,>LE01Gene08571,>LE01Gene08155,>LE01Gene07276,>LE01Gene12618,>LE01Gene13065,>LE01Gene06355,>LE01Gene09851,>LE01Gene06352,>LE01Gene13008,>LE01Gene05850,>LE01Gene04586,>LE01Gene01076,>LE01Gene08917,>LE01Gene08075,>LE01Gene01885,>LE01Gene14307,>LE01Gene08437,>LE01Gene…	0.00612047
Molecular function	serine-type peptidase activity	GO:0008236	5	0.000960423	1.96765	21	57	1303	6959	>LE01Gene09473,>LE01Gene11793,>LE01Gene13977,>LE01Gene04165,>LE01Gene07675,>LE01Gene05410,>LE01Gene05823,>LE01Gene08460,>LE01Gene06260,>LE01Gene11653,>LE01Gene12476,>LE01Gene13788,>LE01Gene07031,>LE01Gene12866,>LE01Gene05677,>LE01Gene10154,>LE01Gene08615,>LE01Gene05588,>LE01Gene04243,>LE01Gene11807,>LE01Gene07312,	0.0178437		Molecular function	active ion transmembrane transporter activity	GO:0022853	5	0.0003641	2.39795	17	55	897	6959	>LE01Gene12240,>LE01Gene12697,>LE01Gene12618,>LE01Gene13008,>LE01Gene05850,>LE01Gene01076,>LE01Gene08075,>LE01Gene01885,>LE01Gene03585,>LE01Gene06610,>LE01Gene01780,>LE01Gene06179,>LE01Gene03007,>LE01Gene08280,>LE01Gene11842,>LE01Gene05183,>LE01Gene04234,	0.00642924
Molecular function	serine hydrolase activity	GO:0017171	4	0.000960423	1.96765	21	57	1303	6959	>LE01Gene09473,>LE01Gene11793,>LE01Gene13977,>LE01Gene04165,>LE01Gene07675,>LE01Gene05410,>LE01Gene05823,>LE01Gene08460,>LE01Gene06260,>LE01Gene11653,>LE01Gene12476,>LE01Gene13788,>LE01Gene07031,>LE01Gene12866,>LE01Gene05677,>LE01Gene10154,>LE01Gene08615,>LE01Gene05588,>LE01Gene04243,>LE01Gene11807,>LE01Gene07312,	0.0178437		Molecular function	cation transmembrane transporter activity	GO:0008324	5	0.000391265	1.97755	26	102	897	6959	>LE01Gene06407,>LE01Gene12240,>LE01Gene12697,>LE01Gene12618,>LE01Gene06352,>LE01Gene13008,>LE01Gene05850,>LE01Gene04586,>LE01Gene01076,>LE01Gene08075,>LE01Gene01885,>LE01Gene14307,>LE01Gene07924,>LE01Gene03585,>LE01Gene06610,>LE01Gene02270,>LE01Gene01780,>LE01Gene10225,>LE01Gene03934,>LE01Gene06179,>LE01Gene03007,>LE01Gene08280,>LE01Gene09140,>LE01Gene11842,>LE01Gene05183,>LE01Gene04234,	0.00673177
Molecular function	exopeptidase activity	GO:0008238	5	0.00100914	2.19108	16	39	1303	6959	>LE01Gene01150,>LE01Gene02852,>LE01Gene09473,>LE01Gene04165,>LE01Gene03689,>LE01Gene05870,>LE01Gene05410,>LE01Gene05823,>LE01Gene08460,>LE01Gene00983,>LE01Gene06260,>LE01Gene04489,>LE01Gene07031,>LE01Gene10154,>LE01Gene11807,>LE01Gene07312,	0.0178114		Molecular function	passive transmembrane transporter activity	GO:0022803	4	0.000419291	3.49114	9	20	897	6959	>LE01Gene06407,>LE01Gene13008,>LE01Gene01885,>LE01Gene03585,>LE01Gene06610,>LE01Gene01780,>LE01Gene09688,>LE01Gene06956,>LE01Gene03007,	0.00703361
Molecular function	vitamin binding	GO:0019842	4	0.00116112	1.80337	26	77	1303	6959	>LE01Gene04649,>LE01Gene12266,>LE01Gene07739,>LE01Gene04205,>LE01Gene02448,>LE01Gene02892,>LE01Gene00628,>LE01Gene03297,>LE01Gene12136,>LE01Gene01404,>LE01Gene12537,>LE01Gene01371,>LE01Gene11102,>LE01Gene13771,>LE01Gene10653,>LE01Gene11927,>LE01Gene13255,>LE01Gene13270,>LE01Gene04325,>LE01Gene01674,>LE01Gene09131,>LE01Gene11499,>LE01Gene08271,>LE01Gene10585,>LE01Gene11817,>LE01Gene08653,	0.0199939		Molecular function	channel activity	GO:0015267	5	0.000419291	3.49114	9	20	897	6959	>LE01Gene06407,>LE01Gene13008,>LE01Gene01885,>LE01Gene03585,>LE01Gene06610,>LE01Gene01780,>LE01Gene09688,>LE01Gene06956,>LE01Gene03007,	0.00703361
Molecular function	antioxidant activity	GO:0016209	2	0.00130093	2.04539	18	47	1303	6959	>LE01Gene01167,>LE01Gene09060,>LE01Gene10877,>LE01Gene10879,>LE01Gene08997,>LE01Gene08061,>LE01Gene10767,>LE01Gene01844,>LE01Gene04499,>LE01Gene03530,>LE01Gene10614,>LE01Gene02143,>LE01Gene12747,>LE01Gene04245,>LE01Gene08669,>LE01Gene06488,>LE01Gene08639,>LE01Gene10965,	0.021868		Molecular function	oxidoreductase activity, acting on the aldehyde or oxo group of donors, disulfide as acceptor	GO:0016624	5	0.000590473	5.54149	5	7	897	6959	>LE01Gene04224,>LE01Gene01553,>LE01Gene09374,>LE01Gene10284,>LE01Gene06114,	0.00943352
Molecular function	hydrolase activity, acting on carbon-nitrogen (but not peptide) bonds, in linear amides	GO:0016811	5	0.00151467	2.67038	10	20	1303	6959	>LE01Gene09080,>LE01Gene10881,>LE01Gene10882,>LE01Gene00645,>LE01Gene05870,>LE01Gene12490,>LE01Gene12831,>LE01Gene11524,>LE01Gene06090,>LE01Gene06091,	0.0248688		Molecular function	ion transmembrane transporter activity	GO:0015075	4	0.000746254	1.75354	33	146	897	6959	>LE01Gene06407,>LE01Gene12240,>LE01Gene12697,>LE01Gene13912,>LE01Gene08155,>LE01Gene07276,>LE01Gene12618,>LE01Gene06352,>LE01Gene13008,>LE01Gene05850,>LE01Gene04586,>LE01Gene01076,>LE01Gene08075,>LE01Gene01885,>LE01Gene14307,>LE01Gene07924,>LE01Gene03585,>LE01Gene00078,>LE01Gene06610,>LE01Gene02270,>LE01Gene01780,>LE01Gene10225,>LE01Gene03934,>LE01Gene06179,>LE01Gene09688,>LE01Gene06956,>LE01Gene…	0.011645
Molecular function	transferase activity, transferring alkyl or aryl (other than methyl) groups	GO:0016765	4	0.00163698	2.31433	13	30	1303	6959	>LE01Gene00290,>LE01Gene05932,>LE01Gene09443,>LE01Gene10823,>LE01Gene02397,>LE01Gene11602,>LE01Gene07177,>LE01Gene00039,>LE01Gene07012,>LE01Gene12813,>LE01Gene06195,>LE01Gene02135,>LE01Gene01624,	0.026266		Molecular function	oxidoreductase activity, acting on NAD(P)H	GO:0016651	4	0.000909587	2.98388	10	26	897	6959	>LE01Gene11377,>LE01Gene09851,>LE01Gene03245,>LE01Gene03255,>LE01Gene07617,>LE01Gene10351,>LE01Gene08432,>LE01Gene05778,>LE01Gene10683,>LE01Gene02186,	0.0138712
Molecular function	aspartic-type endopeptidase activity	GO:0004190	6	0.00275047	1.97376	17	46	1303	6959	>LE01Gene06847,>LE01Gene04199,>LE01Gene00642,>LE01Gene12184,>LE01Gene04568,>LE01Gene05418,>LE01Gene04979,>LE01Gene12959,>LE01Gene12816,>LE01Gene12715,>LE01Gene05178,>LE01Gene05186,>LE01Gene09101,>LE01Gene05586,>LE01Gene02061,>LE01Gene06423,>LE01Gene06489,	0.0431518		Molecular function	inorganic molecular entity transmembrane transporter activity	GO:0015318	4	0.000919898	1.76839	31	136	897	6959	>LE01Gene06407,>LE01Gene12240,>LE01Gene12697,>LE01Gene13912,>LE01Gene08155,>LE01Gene07276,>LE01Gene12618,>LE01Gene06352,>LE01Gene13008,>LE01Gene05850,>LE01Gene04586,>LE01Gene01076,>LE01Gene08075,>LE01Gene01885,>LE01Gene14307,>LE01Gene03585,>LE01Gene06610,>LE01Gene02270,>LE01Gene01780,>LE01Gene10225,>LE01Gene03934,>LE01Gene06179,>LE01Gene09688,>LE01Gene06956,>LE01Gene03007,>LE01Gene08280,>LE01Gene…	0.0137167
Molecular function	aspartic-type peptidase activity	GO:0070001	5	0.00275047	1.97376	17	46	1303	6959	>LE01Gene06847,>LE01Gene04199,>LE01Gene00642,>LE01Gene12184,>LE01Gene04568,>LE01Gene05418,>LE01Gene04979,>LE01Gene12959,>LE01Gene12816,>LE01Gene12715,>LE01Gene05178,>LE01Gene05186,>LE01Gene09101,>LE01Gene05586,>LE01Gene02061,>LE01Gene06423,>LE01Gene06489,	0.0431518		Molecular function	ATP hydrolysis activity	GO:0016887	8	0.00109526	1.70177	34	155	897	6959	>LE01Gene01153,>LE01Gene14838,>LE01Gene06801,>LE01Gene10066,>LE01Gene02413,>LE01Gene00240,>LE01Gene08571,>LE01Gene12618,>LE01Gene13008,>LE01Gene06736,>LE01Gene08917,>LE01Gene12186,>LE01Gene01885,>LE01Gene00959,>LE01Gene07551,>LE01Gene10711,>LE01Gene00925,>LE01Gene03585,>LE01Gene06610,>LE01Gene01780,>LE01Gene13321,>LE01Gene08350,>LE01Gene01735,>LE01Gene11915,>LE01Gene08779,>LE01Gene03094,>LE01Gene…	0.0159766
Molecular function	alpha-galactosidase activity	GO:0004557	7	0.00342813	3.81482	5	7	1303	6959	>LE01Gene06823,>LE01Gene01844,>LE01Gene05323,>LE01Gene09625,>LE01Gene11927,	0.051495		Molecular function	ATPase activity, coupled to transmembrane movement of ions, rotational mechanism	GO:0044769	8	0.00117074	4.23168	6	11	897	6959	>LE01Gene13008,>LE01Gene01885,>LE01Gene03585,>LE01Gene06610,>LE01Gene01780,>LE01Gene03007,	0.0167141
Molecular function	racemase and epimerase activity	GO:0016854	4	0.00342813	3.81482	5	7	1303	6959	>LE01Gene06846,>LE01Gene01199,>LE01Gene08877,>LE01Gene09277,>LE01Gene03058,	0.051495		Molecular function	metalloendopeptidase activity	GO:0004222	6	0.00145089	3.62044	7	15	897	6959	>LE01Gene02392,>LE01Gene07593,>LE01Gene05212,>LE01Gene12334,>LE01Gene00365,>LE01Gene13675,>LE01Gene00730,	0.0202822
Molecular function	intramolecular oxidoreductase activity, interconverting aldoses and ketoses	GO:0016861	5	0.00342813	3.81482	5	7	1303	6959	>LE01Gene04192,>LE01Gene11222,>LE01Gene03017,>LE01Gene01640,>LE01Gene05567,	0.051495		Molecular function	transmembrane transporter activity	GO:0022857	3	0.00148562	1.4997	52	269	897	6959	>LE01Gene01153,>LE01Gene06407,>LE01Gene14838,>LE01Gene00254,>LE01Gene12240,>LE01Gene12697,>LE01Gene13912,>LE01Gene08571,>LE01Gene08155,>LE01Gene07276,>LE01Gene12618,>LE01Gene13065,>LE01Gene06355,>LE01Gene09851,>LE01Gene06352,>LE01Gene13008,>LE01Gene05850,>LE01Gene04586,>LE01Gene01076,>LE01Gene08917,>LE01Gene08075,>LE01Gene01885,>LE01Gene14307,>LE01Gene08419,>LE01Gene08432,>LE01Gene07552,>LE01Gene…	0.0203439
Molecular function	enzyme inhibitor activity	GO:0004857	4	0.00342813	3.81482	5	7	1303	6959	>LE01Gene12503,>LE01Gene05309,>LE01Gene05314,>LE01Gene05312,>LE01Gene04862,	0.051495		Molecular function	DNA binding	GO:0003677	5	0.00161776	1.34657	88	507	897	6959	>LE01Gene05510,>LE01Gene05966,>LE01Gene03366,>LE01Gene02017,>LE01Gene08161,>LE01Gene01532,>LE01Gene10059,>LE01Gene10066,>LE01Gene02413,>LE01Gene01563,>LE01Gene04609,>LE01Gene00640,>LE01Gene06315,>LE01Gene03287,>LE01Gene05470,>LE01Gene06785,>LE01Gene07689,>LE01Gene04168,>LE01Gene08526,>LE01Gene04172,>LE01Gene05860,>LE01Gene05873,>LE01Gene12163,>LE01Gene11291,>LE01Gene12144,>LE01Gene13061,>LE01Gene…	0.0217103
Molecular function	acid-amino acid ligase activity	GO:0016881	5	0.00390994	2.20997	12	29	1303	6959	>LE01Gene12269,>LE01Gene05082,>LE01Gene13915,>LE01Gene00650,>LE01Gene07671,>LE01Gene07121,>LE01Gene07123,>LE01Gene09327,>LE01Gene10267,>LE01Gene07875,>LE01Gene00353,>LE01Gene01621,	0.0541259		Molecular function	rRNA binding	GO:0019843	6	0.00208759	3.87904	6	12	897	6959	>LE01Gene14438,>LE01Gene01578,>LE01Gene09867,>LE01Gene02296,>LE01Gene11443,>LE01Gene04253,	0.0274661
Molecular function	magnesium ion binding	GO:0000287	6	0.00562793	1.89893	16	45	1303	6959	>LE01Gene13156,>LE01Gene01520,>LE01Gene01586,>LE01Gene02892,>LE01Gene12136,>LE01Gene08939,>LE01Gene09790,>LE01Gene03564,>LE01Gene05711,>LE01Gene03056,>LE01Gene06537,>LE01Gene05618,>LE01Gene00324,>LE01Gene04720,>LE01Gene11499,>LE01Gene07329,	0.0735799		Molecular function	obsolete cofactor binding	GO:0048037	0	0.00218442	1.33342	88	512	897	6959	>LE01Gene03315,>LE01Gene12270,>LE01Gene06866,>LE01Gene02875,>LE01Gene01549,>LE01Gene01574,>LE01Gene11377,>LE01Gene09065,>LE01Gene09434,>LE01Gene11772,>LE01Gene05485,>LE01Gene05450,>LE01Gene06357,>LE01Gene01912,>LE01Gene09851,>LE01Gene07683,>LE01Gene06353,>LE01Gene05426,>LE01Gene05421,>LE01Gene03255,>LE01Gene07617,>LE01Gene04110,>LE01Gene08075,>LE01Gene10351,>LE01Gene09374,>LE01Gene01462,>LE01Gene…	0.0266499
Molecular function	pyridoxal phosphate binding	GO:0030170	6	0.00740788	1.74956	19	58	1303	6959	>LE01Gene07739,>LE01Gene04205,>LE01Gene02448,>LE01Gene00628,>LE01Gene03297,>LE01Gene01404,>LE01Gene12537,>LE01Gene01371,>LE01Gene11102,>LE01Gene13771,>LE01Gene10653,>LE01Gene11927,>LE01Gene13255,>LE01Gene13270,>LE01Gene04325,>LE01Gene01674,>LE01Gene08271,>LE01Gene10585,>LE01Gene11817,	0.0871661		Molecular function	ATPase-coupled cation transmembrane transporter activity	GO:0019829	7	0.0028007	2.79291	9	25	897	6959	>LE01Gene12618,>LE01Gene13008,>LE01Gene01885,>LE01Gene03585,>LE01Gene06610,>LE01Gene01780,>LE01Gene03007,>LE01Gene11842,>LE01Gene05183,	0.0335584
Molecular function	vitamin B6 binding	GO:0070279	5	0.00740788	1.74956	19	58	1303	6959	>LE01Gene07739,>LE01Gene04205,>LE01Gene02448,>LE01Gene00628,>LE01Gene03297,>LE01Gene01404,>LE01Gene12537,>LE01Gene01371,>LE01Gene11102,>LE01Gene13771,>LE01Gene10653,>LE01Gene11927,>LE01Gene13255,>LE01Gene13270,>LE01Gene04325,>LE01Gene01674,>LE01Gene08271,>LE01Gene10585,>LE01Gene11817,	0.0871661		Molecular function	ATPase-coupled ion transmembrane transporter activity	GO:0042625	7	0.0028007	2.79291	9	25	897	6959	>LE01Gene12618,>LE01Gene13008,>LE01Gene01885,>LE01Gene03585,>LE01Gene06610,>LE01Gene01780,>LE01Gene03007,>LE01Gene11842,>LE01Gene05183,	0.0335584
Molecular function	polygalacturonase activity	GO:0004650	6	0.00795904	2.67038	7	14	1303	6959	>LE01Gene05940,>LE01Gene02894,>LE01Gene02734,>LE01Gene12986,>LE01Gene03020,>LE01Gene06973,>LE01Gene13684,	0.0906304		Molecular function	cytoskeletal motor activity	GO:0003774	2	0.0028007	2.79291	9	25	897	6959	>LE01Gene05546,>LE01Gene05437,>LE01Gene11633,>LE01Gene12981,>LE01Gene03108,>LE01Gene00089,>LE01Gene09130,>LE01Gene00755,>LE01Gene00757,	0.0335584
Molecular function	glycosyltransferase activity	GO:0016757	4	0.00876448	1.52593	30	105	1303	6959	>LE01Gene13132,>LE01Gene06881,>LE01Gene13510,>LE01Gene02893,>LE01Gene02420,>LE01Gene06379,>LE01Gene00638,>LE01Gene12625,>LE01Gene07209,>LE01Gene00185,>LE01Gene01422,>LE01Gene13404,>LE01Gene00561,>LE01Gene00134,>LE01Gene12571,>LE01Gene11247,>LE01Gene11248,>LE01Gene08018,>LE01Gene10334,>LE01Gene02724,>LE01Gene12908,>LE01Gene02239,>LE01Gene14235,>LE01Gene13733,>LE01Gene13736,>LE01Gene03859,>LE01Gene…	0.0982178		Molecular function	cytochrome-c oxidase activity	GO:0004129	8	0.0028316	4.31005	5	9	897	6959	>LE01Gene12240,>LE01Gene01076,>LE01Gene06179,>LE01Gene08280,>LE01Gene04234,	0.0322035
Molecular function	peptidase activity	GO:0008233	4	0.00882781	1.34097	58	231	1303	6959	>LE01Gene01150,>LE01Gene06847,>LE01Gene06858,>LE01Gene02852,>LE01Gene05928,>LE01Gene04199,>LE01Gene09473,>LE01Gene11793,>LE01Gene13976,>LE01Gene13977,>LE01Gene00642,>LE01Gene04165,>LE01Gene07675,>LE01Gene03689,>LE01Gene05870,>LE01Gene13052,>LE01Gene12184,>LE01Gene05410,>LE01Gene04568,>LE01Gene05418,>LE01Gene01888,>LE01Gene04912,>LE01Gene07195,>LE01Gene05823,>LE01Gene04979,>LE01Gene14775,>LE01Gene…	0.0973818		Molecular function	oxidoreductase activity, acting on NAD(P)H, quinone or similar compound as acceptor	GO:0016655	5	0.0028316	4.31005	5	9	897	6959	>LE01Gene09851,>LE01Gene08432,>LE01Gene05778,>LE01Gene10683,>LE01Gene02186,	0.0322035
Molecular function	ligase activity	GO:0016874	3	0.0104819	1.41272	41	155	1303	6959	>LE01Gene12269,>LE01Gene01520,>LE01Gene01586,>LE01Gene10058,>LE01Gene05082,>LE01Gene13915,>LE01Gene00650,>LE01Gene01963,>LE01Gene07671,>LE01Gene04519,>LE01Gene00166,>LE01Gene03256,>LE01Gene01054,>LE01Gene01438,>LE01Gene01407,>LE01Gene12954,>LE01Gene07121,>LE01Gene10765,>LE01Gene07123,>LE01Gene07172,>LE01Gene04905,>LE01Gene09327,>LE01Gene07156,>LE01Gene05356,>LE01Gene08833,>LE01Gene07910,>LE01Gene…	0.11385		Molecular function	oxidoreductase activity, acting on a heme group of donors	GO:0016675	4	0.0028316	4.31005	5	9	897	6959	>LE01Gene12240,>LE01Gene01076,>LE01Gene06179,>LE01Gene08280,>LE01Gene04234,	0.0322035
Molecular function	FMN binding	GO:0010181	7	0.0111199	1.82071	15	44	1303	6959	>LE01Gene14008,>LE01Gene13513,>LE01Gene13084,>LE01Gene04157,>LE01Gene01873,>LE01Gene05328,>LE01Gene06236,>LE01Gene04416,>LE01Gene03524,>LE01Gene12483,>LE01Gene08338,>LE01Gene00394,>LE01Gene08707,>LE01Gene10171,>LE01Gene05160,	0.118949		Molecular function	obsolete oxidoreductase activity, acting on a heme group of donors, oxygen as acceptor	GO:0016676	0	0.0028316	4.31005	5	9	897	6959	>LE01Gene12240,>LE01Gene01076,>LE01Gene06179,>LE01Gene08280,>LE01Gene04234,	0.0322035
Molecular function	oxidoreductase activity, acting on the aldehyde or oxo group of donors, NAD or NADP as acceptor	GO:0016620	5	0.0147416	2.05414	10	26	1303	6959	>LE01Gene01966,>LE01Gene05481,>LE01Gene09818,>LE01Gene07676,>LE01Gene07114,>LE01Gene04469,>LE01Gene03960,>LE01Gene06992,>LE01Gene12309,>LE01Gene08279,	0.150834		Molecular function	obsolete heme-copper terminal oxidase activity	GO:0015002	0	0.0028316	4.31005	5	9	897	6959	>LE01Gene12240,>LE01Gene01076,>LE01Gene06179,>LE01Gene08280,>LE01Gene04234,	0.0322035
Molecular function	amino acid transmembrane transporter activity	GO:0015171	6	0.0147416	2.05414	10	26	1303	6959	>LE01Gene12209,>LE01Gene08151,>LE01Gene03637,>LE01Gene07118,>LE01Gene04028,>LE01Gene07949,>LE01Gene06516,>LE01Gene04797,>LE01Gene01666,>LE01Gene03390,	0.150834		Molecular function	NADH dehydrogenase activity	GO:0003954	5	0.0028316	4.31005	5	9	897	6959	>LE01Gene09851,>LE01Gene08432,>LE01Gene05778,>LE01Gene10683,>LE01Gene02186,	0.0322035
Molecular function	UDP-N-acetylmuramate dehydrogenase activity	GO:0008762	6	0.0157548	2.24874	8	19	1303	6959	>LE01Gene06745,>LE01Gene10788,>LE01Gene07124,>LE01Gene00046,>LE01Gene00047,>LE01Gene00015,>LE01Gene08676,>LE01Gene05597,	0.15666		Molecular function	NAD(P)H dehydrogenase (quinone) activity	GO:0003955	6	0.0028316	4.31005	5	9	897	6959	>LE01Gene09851,>LE01Gene08432,>LE01Gene05778,>LE01Gene10683,>LE01Gene02186,	0.0322035
Molecular function	organic acid transmembrane transporter activity	GO:0005342	4	0.0195786	1.97806	10	27	1303	6959	>LE01Gene12209,>LE01Gene08151,>LE01Gene03637,>LE01Gene07118,>LE01Gene04028,>LE01Gene07949,>LE01Gene06516,>LE01Gene04797,>LE01Gene01666,>LE01Gene03390,	0.191979		Molecular function	NADH dehydrogenase (ubiquinone) activity	GO:0008137	8	0.0028316	4.31005	5	9	897	6959	>LE01Gene09851,>LE01Gene08432,>LE01Gene05778,>LE01Gene10683,>LE01Gene02186,	0.0322035
Molecular function	carboxylic acid transmembrane transporter activity	GO:0046943	5	0.0195786	1.97806	10	27	1303	6959	>LE01Gene12209,>LE01Gene08151,>LE01Gene03637,>LE01Gene07118,>LE01Gene04028,>LE01Gene07949,>LE01Gene06516,>LE01Gene04797,>LE01Gene01666,>LE01Gene03390,	0.191979		Molecular function	NADH dehydrogenase (quinone) activity	GO:0050136	7	0.0028316	4.31005	5	9	897	6959	>LE01Gene09851,>LE01Gene08432,>LE01Gene05778,>LE01Gene10683,>LE01Gene02186,	0.0322035
Molecular function	isomerase activity	GO:0016853	3	0.0216079	1.51651	23	81	1303	6959	>LE01Gene06846,>LE01Gene01199,>LE01Gene04192,>LE01Gene08939,>LE01Gene12197,>LE01Gene11222,>LE01Gene11685,>LE01Gene13420,>LE01Gene09790,>LE01Gene03184,>LE01Gene08877,>LE01Gene01388,>LE01Gene14216,>LE01Gene09277,>LE01Gene04825,>LE01Gene02677,>LE01Gene03058,>LE01Gene02129,>LE01Gene10194,>LE01Gene03017,>LE01Gene01640,>LE01Gene10176,>LE01Gene05567,	0.206151		Molecular function	ATPase-coupled transmembrane transporter activity	GO:0042626	6	0.00339573	1.99829	17	66	897	6959	>LE01Gene01153,>LE01Gene14838,>LE01Gene08571,>LE01Gene12618,>LE01Gene13008,>LE01Gene08917,>LE01Gene01885,>LE01Gene08419,>LE01Gene03585,>LE01Gene06610,>LE01Gene01780,>LE01Gene01735,>LE01Gene08779,>LE01Gene03007,>LE01Gene09163,>LE01Gene11842,>LE01Gene05183,	0.0325505
Molecular function	oxidoreductase activity, acting on the CH-NH2 group of donors, oxygen as acceptor	GO:0016641	5	0.0219913	2.46496	6	13	1303	6959	>LE01Gene06854,>LE01Gene01873,>LE01Gene04056,>LE01Gene06236,>LE01Gene04738,>LE01Gene06092,	0.207012		Molecular function	oxidoreductase activity, acting on the CH-CH group of donors	GO:0016627	4	0.00535741	2.21659	12	42	897	6959	>LE01Gene01123,>LE01Gene03315,>LE01Gene05475,>LE01Gene08473,>LE01Gene00953,>LE01Gene09743,>LE01Gene00943,>LE01Gene02208,>LE01Gene08705,>LE01Gene01288,>LE01Gene02513,>LE01Gene11013,	0.0506313
Molecular function	organic anion transmembrane transporter activity	GO:0008514	6	0.0254807	1.90741	10	28	1303	6959	>LE01Gene12209,>LE01Gene08151,>LE01Gene03637,>LE01Gene07118,>LE01Gene04028,>LE01Gene07949,>LE01Gene06516,>LE01Gene04797,>LE01Gene01666,>LE01Gene03390,	0.227713		Molecular function	structural constituent of cell wall	GO:0005199	3	0.00539865	3.32489	6	14	897	6959	>LE01Gene13539,>LE01Gene13506,>LE01Gene13552,>LE01Gene10826,>LE01Gene08487,>LE01Gene03013,	0.0503124
Molecular function	flavin adenine dinucleotide binding	GO:0050660	6	0.0372097	1.42041	25	94	1303	6959	>LE01Gene13129,>LE01Gene07621,>LE01Gene11707,>LE01Gene11705,>LE01Gene10868,>LE01Gene06745,>LE01Gene10788,>LE01Gene07124,>LE01Gene04010,>LE01Gene00046,>LE01Gene00047,>LE01Gene13764,>LE01Gene04820,>LE01Gene00015,>LE01Gene02678,>LE01Gene04836,>LE01Gene08342,>LE01Gene05668,>LE01Gene05678,>LE01Gene02540,>LE01Gene08676,>LE01Gene05597,>LE01Gene10914,>LE01Gene04232,>LE01Gene07753,	0.268062		Molecular function	prenyltransferase activity	GO:0004659	5	0.00539865	3.32489	6	14	897	6959	>LE01Gene09436,>LE01Gene05036,>LE01Gene10315,>LE01Gene07511,>LE01Gene04870,>LE01Gene07419,	0.0503124
Molecular function	oxidoreductase activity, acting on single donors with incorporation of molecular oxygen, incorporation of two atoms of oxygen	GO:0016702	5	0.0388901	2.42761	5	11	1303	6959	>LE01Gene04116,>LE01Gene02634,>LE01Gene11982,>LE01Gene09227,>LE01Gene02142,	0.277337		Molecular function	hydrolase activity	GO:0016787	3	0.00617756	1.16092	208	1390	897	6959	>LE01Gene06843,>LE01Gene01152,>LE01Gene01153,>LE01Gene05510,>LE01Gene12259,>LE01Gene03366,>LE01Gene03365,>LE01Gene05546,>LE01Gene02017,>LE01Gene07713,>LE01Gene00690,>LE01Gene13505,>LE01Gene14838,>LE01Gene01539,>LE01Gene10059,>LE01Gene06801,>LE01Gene10066,>LE01Gene13578,>LE01Gene00230,>LE01Gene02413,>LE01Gene01567,>LE01Gene10030,>LE01Gene12213,>LE01Gene00240,>LE01Gene11755,>LE01Gene09895,>LE01Gene…	0.0560154
Molecular function	ligase activity, forming carbon-oxygen bonds	GO:0016875	4	0.0397536	1.68655	12	38	1303	6959	>LE01Gene01520,>LE01Gene10058,>LE01Gene01963,>LE01Gene04519,>LE01Gene00166,>LE01Gene03256,>LE01Gene01438,>LE01Gene10765,>LE01Gene08833,>LE01Gene01304,>LE01Gene08387,>LE01Gene12401,	0.28066		Molecular function	oxidoreductase activity, acting on CH-OH group of donors	GO:0016614	4	0.00672985	1.69939	23	105	897	6959	>LE01Gene04206,>LE01Gene01549,>LE01Gene11394,>LE01Gene01574,>LE01Gene09065,>LE01Gene11772,>LE01Gene05485,>LE01Gene06353,>LE01Gene05421,>LE01Gene03650,>LE01Gene08443,>LE01Gene04052,>LE01Gene04426,>LE01Gene08818,>LE01Gene06192,>LE01Gene01259,>LE01Gene08704,>LE01Gene00331,>LE01Gene09156,>LE01Gene09147,>LE01Gene09192,>LE01Gene06023,>LE01Gene02931,	0.0602097
Molecular function	aminoacyl-tRNA ligase activity	GO:0004812	6	0.0397536	1.68655	12	38	1303	6959	>LE01Gene01520,>LE01Gene10058,>LE01Gene01963,>LE01Gene04519,>LE01Gene00166,>LE01Gene03256,>LE01Gene01438,>LE01Gene10765,>LE01Gene08833,>LE01Gene01304,>LE01Gene08387,>LE01Gene12401,	0.28066		Molecular function	nucleoside binding	GO:0001882	4	0.00744569	1.61129	27	130	897	6959	>LE01Gene03365,>LE01Gene03345,>LE01Gene10030,>LE01Gene09895,>LE01Gene08138,>LE01Gene07689,>LE01Gene01018,>LE01Gene01434,>LE01Gene01435,>LE01Gene10330,>LE01Gene09341,>LE01Gene10717,>LE01Gene08828,>LE01Gene05769,>LE01Gene01305,>LE01Gene04803,>LE01Gene11519,>LE01Gene10687,>LE01Gene03067,>LE01Gene00801,>LE01Gene05610,>LE01Gene03467,>LE01Gene05197,>LE01Gene08622,>LE01Gene07300,>LE01Gene09510,>LE01Gene…	0.0648839
Molecular function	translation elongation factor activity	GO:0003746	7	0.0458292	2.1363	6	15	1303	6959	>LE01Gene12685,>LE01Gene06351,>LE01Gene06725,>LE01Gene03252,>LE01Gene07174,>LE01Gene05679,	0.308147		Molecular function	transmembrane signaling receptor activity	GO:0004888	4	0.00831231	3.5264	5	11	897	6959	>LE01Gene05407,>LE01Gene09740,>LE01Gene08702,>LE01Gene08685,>LE01Gene08688,	0.068019
Molecular function	oxidoreductase activity, acting on single donors with incorporation of molecular oxygen	GO:0016701	4	0.0494261	1.96765	7	19	1303	6959	>LE01Gene04116,>LE01Gene02634,>LE01Gene11982,>LE01Gene09227,>LE01Gene05229,>LE01Gene11953,>LE01Gene02142,	0.320136		Molecular function	oxidoreductase activity, acting on the aldehyde or oxo group of donors	GO:0016903	4	0.00857551	2.28179	10	34	897	6959	>LE01Gene12270,>LE01Gene04224,>LE01Gene01553,>LE01Gene12649,>LE01Gene09374,>LE01Gene13422,>LE01Gene12494,>LE01Gene10284,>LE01Gene06114,>LE01Gene04343,	0.0693273
Cellular component	extracellular region	GO:0005576	3	1.11022e-14	4.29228	32	60	354	2849	>LE01Gene03370,>LE01Gene13508,>LE01Gene10050,>LE01Gene09060,>LE01Gene07273,>LE01Gene08997,>LE01Gene04104,>LE01Gene03223,>LE01Gene06745,>LE01Gene08044,>LE01Gene11268,>LE01Gene11282,>LE01Gene10302,>LE01Gene12986,>LE01Gene06603,>LE01Gene12496,>LE01Gene02639,>LE01Gene04829,>LE01Gene09249,>LE01Gene09248,>LE01Gene10634,>LE01Gene01726,>LE01Gene12864,>LE01Gene05218,>LE01Gene11041,>LE01Gene03020,>LE01Gene…	2.54241e-12		Molecular function	obsolete coenzyme binding	GO:0050662	0	0.00890521	1.38343	51	286	897	6959	>LE01Gene03315,>LE01Gene12270,>LE01Gene06866,>LE01Gene02875,>LE01Gene01549,>LE01Gene01574,>LE01Gene11377,>LE01Gene09065,>LE01Gene09434,>LE01Gene11772,>LE01Gene05485,>LE01Gene05450,>LE01Gene01912,>LE01Gene09851,>LE01Gene06353,>LE01Gene05426,>LE01Gene05421,>LE01Gene03255,>LE01Gene07617,>LE01Gene10351,>LE01Gene09374,>LE01Gene01462,>LE01Gene03650,>LE01Gene00118,>LE01Gene09307,>LE01Gene10319,>LE01Gene…	0.0711357
Cellular component	integral component of membrane	GO:0016021	4	1.03175e-11	1.64121	135	662	354	2849	>LE01Gene05504,>LE01Gene06812,>LE01Gene11341,>LE01Gene02405,>LE01Gene12209,>LE01Gene08162,>LE01Gene00682,>LE01Gene00206,>LE01Gene11335,>LE01Gene05946,>LE01Gene01564,>LE01Gene02419,>LE01Gene02420,>LE01Gene05932,>LE01Gene09437,>LE01Gene09443,>LE01Gene08555,>LE01Gene06392,>LE01Gene11737,>LE01Gene11300,>LE01Gene08151,>LE01Gene04136,>LE01Gene13090,>LE01Gene06321,>LE01Gene04140,>LE01Gene06322,>LE01Gene…	1.18136e-09		Molecular function	ATP-dependent activity, acting on DNA	GO:0008094	5	0.00906254	1.90773	15	61	897	6959	>LE01Gene03366,>LE01Gene10059,>LE01Gene02413,>LE01Gene00240,>LE01Gene08526,>LE01Gene02350,>LE01Gene08065,>LE01Gene00959,>LE01Gene11651,>LE01Gene07551,>LE01Gene00925,>LE01Gene02290,>LE01Gene13321,>LE01Gene03094,>LE01Gene06943,	0.0715408
Cellular component	intrinsic component of membrane	GO:0031224	3	1.16791e-11	1.63874	135	663	354	2849	>LE01Gene05504,>LE01Gene06812,>LE01Gene11341,>LE01Gene02405,>LE01Gene12209,>LE01Gene08162,>LE01Gene00682,>LE01Gene00206,>LE01Gene11335,>LE01Gene05946,>LE01Gene01564,>LE01Gene02419,>LE01Gene02420,>LE01Gene05932,>LE01Gene09437,>LE01Gene09443,>LE01Gene08555,>LE01Gene06392,>LE01Gene11737,>LE01Gene11300,>LE01Gene08151,>LE01Gene04136,>LE01Gene13090,>LE01Gene06321,>LE01Gene04140,>LE01Gene06322,>LE01Gene…	8.91505e-10		Molecular function	serine-type endopeptidase activity	GO:0004252	6	0.0106097	2.48259	8	25	897	6959	>LE01Gene09308,>LE01Gene06272,>LE01Gene10711,>LE01Gene05384,>LE01Gene00433,>LE01Gene00362,>LE01Gene00723,>LE01Gene02932,	0.0827801
Cellular component	obsolete membrane part	GO:0044425	0	1.35208e-08	1.4848	138	748	354	2849	>LE01Gene05504,>LE01Gene06812,>LE01Gene11341,>LE01Gene02405,>LE01Gene12209,>LE01Gene08162,>LE01Gene00682,>LE01Gene00206,>LE01Gene11335,>LE01Gene05946,>LE01Gene01564,>LE01Gene02419,>LE01Gene02420,>LE01Gene05932,>LE01Gene09437,>LE01Gene09443,>LE01Gene08555,>LE01Gene06392,>LE01Gene11737,>LE01Gene11300,>LE01Gene08151,>LE01Gene04136,>LE01Gene13090,>LE01Gene06321,>LE01Gene04140,>LE01Gene06322,>LE01Gene…	7.74068e-07		Molecular function	ion binding	GO:0043167	3	0.0110459	1.10304	330	2321	897	6959	>LE01Gene00296,>LE01Gene06839,>LE01Gene04660,>LE01Gene06843,>LE01Gene01153,>LE01Gene00276,>LE01Gene03315,>LE01Gene03366,>LE01Gene03365,>LE01Gene05546,>LE01Gene02038,>LE01Gene06400,>LE01Gene02017,>LE01Gene03345,>LE01Gene06866,>LE01Gene01183,>LE01Gene01184,>LE01Gene02875,>LE01Gene01549,>LE01Gene14838,>LE01Gene12662,>LE01Gene10059,>LE01Gene06801,>LE01Gene10066,>LE01Gene10065,>LE01Gene05959,>LE01Gene…	0.0851928
Cellular component	membrane	GO:0016020	3	2.96108e-08	1.38223	169	984	354	2849	>LE01Gene05504,>LE01Gene06812,>LE01Gene11341,>LE01Gene02405,>LE01Gene12209,>LE01Gene10475,>LE01Gene08162,>LE01Gene00682,>LE01Gene00206,>LE01Gene11335,>LE01Gene05946,>LE01Gene01564,>LE01Gene02419,>LE01Gene02420,>LE01Gene05932,>LE01Gene09437,>LE01Gene09443,>LE01Gene08555,>LE01Gene06392,>LE01Gene11737,>LE01Gene11300,>LE01Gene00668,>LE01Gene08151,>LE01Gene00636,>LE01Gene04136,>LE01Gene13090,>LE01Gene…	1.35618e-06		Molecular function	ribonucleoside binding	GO:0032549	5	0.0113961	1.57586	26	128	897	6959	>LE01Gene03365,>LE01Gene03345,>LE01Gene10030,>LE01Gene09895,>LE01Gene08138,>LE01Gene07689,>LE01Gene01018,>LE01Gene01434,>LE01Gene01435,>LE01Gene10330,>LE01Gene09341,>LE01Gene10717,>LE01Gene08828,>LE01Gene05769,>LE01Gene01305,>LE01Gene04803,>LE01Gene11519,>LE01Gene10687,>LE01Gene03067,>LE01Gene00801,>LE01Gene05610,>LE01Gene03467,>LE01Gene05197,>LE01Gene08622,>LE01Gene07300,>LE01Gene09510,	0.0868952
Cellular component	cytosol	GO:0005829	3	0.0259599	2.14614	8	30	354	2849	>LE01Gene03342,>LE01Gene02434,>LE01Gene02832,>LE01Gene09805,>LE01Gene01407,>LE01Gene04720,>LE01Gene02095,>LE01Gene04299,	0.495401		Molecular function	P-type transmembrane transporter activity	GO:0140358	7	0.0127585	3.23253	5	12	897	6959	>LE01Gene12618,>LE01Gene13008,>LE01Gene01885,>LE01Gene03585,>LE01Gene03007,	0.0961908
Biological process	carbohydrate metabolic process	GO:0005975	4	0	2.18516	157	360	1137	5697	>LE01Gene04657,>LE01Gene05961,>LE01Gene06823,>LE01Gene05973,>LE01Gene04647,>LE01Gene03370,>LE01Gene12203,>LE01Gene01103,>LE01Gene04612,>LE01Gene05940,>LE01Gene00256,>LE01Gene02438,>LE01Gene12231,>LE01Gene02894,>LE01Gene10050,>LE01Gene05074,>LE01Gene05083,>LE01Gene05084,>LE01Gene06393,>LE01Gene01999,>LE01Gene11318,>LE01Gene13979,>LE01Gene00638,>LE01Gene05090,>LE01Gene10432,>LE01Gene07273,>LE01Gene…	0		Molecular function	signaling receptor activity	GO:0038023	3	0.0127585	3.23253	5	12	897	6959	>LE01Gene05407,>LE01Gene09740,>LE01Gene08702,>LE01Gene08685,>LE01Gene08688,	0.0961908
Biological process	obsolete oxidation-reduction process	GO:0055114	0	2.22045e-16	1.77376	274	774	1137	5697	>LE01Gene03325,>LE01Gene05507,>LE01Gene13129,>LE01Gene05518,>LE01Gene13135,>LE01Gene01161,>LE01Gene03303,>LE01Gene04640,>LE01Gene00290,>LE01Gene05541,>LE01Gene06854,>LE01Gene01167,>LE01Gene14008,>LE01Gene01552,>LE01Gene08192,>LE01Gene08198,>LE01Gene01526,>LE01Gene00683,>LE01Gene13513,>LE01Gene11338,>LE01Gene11339,>LE01Gene00256,>LE01Gene04617,>LE01Gene05946,>LE01Gene04619,>LE01Gene09060,>LE01Gene…	1.80078e-13		Molecular function	P-type ion transporter activity	GO:0015662	8	0.0127585	3.23253	5	12	897	6959	>LE01Gene12618,>LE01Gene13008,>LE01Gene01885,>LE01Gene03585,>LE01Gene03007,	0.0961908
Biological process	cellular carbohydrate metabolic process	GO:0044262	5	5.71919e-10	2.28159	51	112	1137	5697	>LE01Gene06823,>LE01Gene12203,>LE01Gene01103,>LE01Gene05940,>LE01Gene00256,>LE01Gene12231,>LE01Gene02894,>LE01Gene10050,>LE01Gene01999,>LE01Gene00638,>LE01Gene08136,>LE01Gene12625,>LE01Gene07209,>LE01Gene04186,>LE01Gene08530,>LE01Gene04541,>LE01Gene03223,>LE01Gene11222,>LE01Gene13404,>LE01Gene04913,>LE01Gene02734,>LE01Gene01448,>LE01Gene09790,>LE01Gene07108,>LE01Gene11660,>LE01Gene04902,>LE01Gene…	3.09217e-07		Molecular function	GTP binding	GO:0005525	9	0.0141716	1.56413	25	124	897	6959	>LE01Gene03365,>LE01Gene03345,>LE01Gene10030,>LE01Gene09895,>LE01Gene08138,>LE01Gene01018,>LE01Gene01434,>LE01Gene01435,>LE01Gene10330,>LE01Gene09341,>LE01Gene10717,>LE01Gene08828,>LE01Gene05769,>LE01Gene01305,>LE01Gene04803,>LE01Gene11519,>LE01Gene10687,>LE01Gene03067,>LE01Gene00801,>LE01Gene05610,>LE01Gene03467,>LE01Gene05197,>LE01Gene08622,>LE01Gene07300,>LE01Gene09510,	0.103361
Biological process	pyridine-containing compound metabolic process	GO:0072524	5	2.44177e-08	2.46999	35	71	1137	5697	>LE01Gene13132,>LE01Gene00256,>LE01Gene00628,>LE01Gene06393,>LE01Gene02390,>LE01Gene01422,>LE01Gene11222,>LE01Gene09790,>LE01Gene09791,>LE01Gene07114,>LE01Gene10334,>LE01Gene01873,>LE01Gene04902,>LE01Gene02725,>LE01Gene05356,>LE01Gene06236,>LE01Gene14216,>LE01Gene03960,>LE01Gene11106,>LE01Gene02678,>LE01Gene10632,>LE01Gene03058,>LE01Gene03056,>LE01Gene06597,>LE01Gene10629,>LE01Gene03019,>LE01Gene…	9.90137e-06		Molecular function	purine ribonucleoside binding	GO:0032550	6	0.0141716	1.56413	25	124	897	6959	>LE01Gene03365,>LE01Gene03345,>LE01Gene10030,>LE01Gene09895,>LE01Gene08138,>LE01Gene01018,>LE01Gene01434,>LE01Gene01435,>LE01Gene10330,>LE01Gene09341,>LE01Gene10717,>LE01Gene08828,>LE01Gene05769,>LE01Gene01305,>LE01Gene04803,>LE01Gene11519,>LE01Gene10687,>LE01Gene03067,>LE01Gene00801,>LE01Gene05610,>LE01Gene03467,>LE01Gene05197,>LE01Gene08622,>LE01Gene07300,>LE01Gene09510,	0.103361
Biological process	glucose 6-phosphate metabolic process	GO:0051156	6	2.569e-08	3.6076	18	25	1137	5697	>LE01Gene00256,>LE01Gene06393,>LE01Gene00638,>LE01Gene11222,>LE01Gene09790,>LE01Gene04902,>LE01Gene02725,>LE01Gene11106,>LE01Gene02678,>LE01Gene10632,>LE01Gene03058,>LE01Gene06597,>LE01Gene10629,>LE01Gene02144,>LE01Gene00733,>LE01Gene10999,>LE01Gene01623,>LE01Gene05567,	8.33383e-06		Molecular function	guanyl ribonucleotide binding	GO:0032561	8	0.0141716	1.56413	25	124	897	6959	>LE01Gene03365,>LE01Gene03345,>LE01Gene10030,>LE01Gene09895,>LE01Gene08138,>LE01Gene01018,>LE01Gene01434,>LE01Gene01435,>LE01Gene10330,>LE01Gene09341,>LE01Gene10717,>LE01Gene08828,>LE01Gene05769,>LE01Gene01305,>LE01Gene04803,>LE01Gene11519,>LE01Gene10687,>LE01Gene03067,>LE01Gene00801,>LE01Gene05610,>LE01Gene03467,>LE01Gene05197,>LE01Gene08622,>LE01Gene07300,>LE01Gene09510,	0.103361
Biological process	cellular aldehyde metabolic process	GO:0006081	4	3.11231e-08	2.75089	28	51	1137	5697	>LE01Gene00256,>LE01Gene09080,>LE01Gene06393,>LE01Gene01966,>LE01Gene11222,>LE01Gene02780,>LE01Gene09790,>LE01Gene07108,>LE01Gene01873,>LE01Gene04902,>LE01Gene02725,>LE01Gene11106,>LE01Gene03949,>LE01Gene02678,>LE01Gene00476,>LE01Gene10632,>LE01Gene03058,>LE01Gene06597,>LE01Gene10629,>LE01Gene02144,>LE01Gene12309,>LE01Gene00733,>LE01Gene10999,>LE01Gene01623,>LE01Gene06090,>LE01Gene06091,>LE01Gene…	8.41361e-06		Molecular function	purine nucleoside binding	GO:0001883	5	0.0141716	1.56413	25	124	897	6959	>LE01Gene03365,>LE01Gene03345,>LE01Gene10030,>LE01Gene09895,>LE01Gene08138,>LE01Gene01018,>LE01Gene01434,>LE01Gene01435,>LE01Gene10330,>LE01Gene09341,>LE01Gene10717,>LE01Gene08828,>LE01Gene05769,>LE01Gene01305,>LE01Gene04803,>LE01Gene11519,>LE01Gene10687,>LE01Gene03067,>LE01Gene00801,>LE01Gene05610,>LE01Gene03467,>LE01Gene05197,>LE01Gene08622,>LE01Gene07300,>LE01Gene09510,	0.103361
Biological process	polysaccharide metabolic process	GO:0005976	5	4.16061e-08	2.2575	41	91	1137	5697	>LE01Gene06823,>LE01Gene12203,>LE01Gene05940,>LE01Gene12231,>LE01Gene02894,>LE01Gene10050,>LE01Gene01999,>LE01Gene13979,>LE01Gene08136,>LE01Gene12625,>LE01Gene07209,>LE01Gene04186,>LE01Gene04541,>LE01Gene04104,>LE01Gene03223,>LE01Gene04913,>LE01Gene02734,>LE01Gene01448,>LE01Gene09790,>LE01Gene11660,>LE01Gene12986,>LE01Gene12045,>LE01Gene07975,>LE01Gene02639,>LE01Gene04829,>LE01Gene09249,>LE01Gene…	9.64073e-06		Molecular function	4 iron, 4 sulfur cluster binding	GO:0051539	5	0.0158348	2.73815	6	17	897	6959	>LE01Gene09851,>LE01Gene08034,>LE01Gene08432,>LE01Gene02208,>LE01Gene02186,>LE01Gene04286,	0.110678
Biological process	carbohydrate catabolic process	GO:0016052	5	7.73049e-08	2.29399	38	83	1137	5697	>LE01Gene06823,>LE01Gene12203,>LE01Gene12231,>LE01Gene10050,>LE01Gene08136,>LE01Gene04186,>LE01Gene04541,>LE01Gene04104,>LE01Gene03223,>LE01Gene02390,>LE01Gene11222,>LE01Gene01448,>LE01Gene09790,>LE01Gene07114,>LE01Gene11660,>LE01Gene04902,>LE01Gene14216,>LE01Gene07975,>LE01Gene03960,>LE01Gene02639,>LE01Gene04829,>LE01Gene09249,>LE01Gene09248,>LE01Gene13789,>LE01Gene12864,>LE01Gene03056,>LE01Gene…	1.56736e-05		Molecular function	protein heterodimerization activity	GO:0046982	5	0.0159295	2.09678	10	37	897	6959	>LE01Gene01532,>LE01Gene12144,>LE01Gene08055,>LE01Gene13783,>LE01Gene13301,>LE01Gene13300,>LE01Gene13784,>LE01Gene03840,>LE01Gene03839,>LE01Gene00778,	0.110193
Biological process	pentose-phosphate shunt	GO:0006098	13	9.41965e-08	3.54914	17	24	1137	5697	>LE01Gene00256,>LE01Gene06393,>LE01Gene11222,>LE01Gene09790,>LE01Gene04902,>LE01Gene02725,>LE01Gene11106,>LE01Gene02678,>LE01Gene10632,>LE01Gene03058,>LE01Gene06597,>LE01Gene10629,>LE01Gene02144,>LE01Gene00733,>LE01Gene10999,>LE01Gene01623,>LE01Gene05567,	1.69763e-05		Molecular function	oxidoreductase activity, acting on the CH-OH group of donors, NAD or NADP as acceptor	GO:0016616	5	0.016946	1.71282	17	77	897	6959	>LE01Gene04206,>LE01Gene01549,>LE01Gene11394,>LE01Gene01574,>LE01Gene09065,>LE01Gene11772,>LE01Gene06353,>LE01Gene05421,>LE01Gene03650,>LE01Gene08443,>LE01Gene04052,>LE01Gene04426,>LE01Gene08818,>LE01Gene06192,>LE01Gene00331,>LE01Gene06023,>LE01Gene02931,	0.111478
Biological process	NADPH regeneration	GO:0006740	12	9.41965e-08	3.54914	17	24	1137	5697	>LE01Gene00256,>LE01Gene06393,>LE01Gene11222,>LE01Gene09790,>LE01Gene04902,>LE01Gene02725,>LE01Gene11106,>LE01Gene02678,>LE01Gene10632,>LE01Gene03058,>LE01Gene06597,>LE01Gene10629,>LE01Gene02144,>LE01Gene00733,>LE01Gene10999,>LE01Gene01623,>LE01Gene05567,	1.69763e-05		Molecular function	copper ion binding	GO:0005507	7	0.0172449	2.29869	8	27	897	6959	>LE01Gene04660,>LE01Gene09893,>LE01Gene00669,>LE01Gene04977,>LE01Gene00148,>LE01Gene01372,>LE01Gene06962,>LE01Gene07758,	0.112343
Biological process	glyceraldehyde-3-phosphate metabolic process	GO:0019682	6	9.41965e-08	3.54914	17	24	1137	5697	>LE01Gene00256,>LE01Gene06393,>LE01Gene11222,>LE01Gene09790,>LE01Gene04902,>LE01Gene02725,>LE01Gene11106,>LE01Gene02678,>LE01Gene10632,>LE01Gene03058,>LE01Gene06597,>LE01Gene10629,>LE01Gene02144,>LE01Gene00733,>LE01Gene10999,>LE01Gene01623,>LE01Gene05567,	1.69763e-05		Molecular function	iron-sulfur cluster binding	GO:0051536	4	0.0191968	2.0416	10	38	897	6959	>LE01Gene09851,>LE01Gene08075,>LE01Gene08034,>LE01Gene08432,>LE01Gene05778,>LE01Gene02208,>LE01Gene02186,>LE01Gene05255,>LE01Gene02945,>LE01Gene04286,	0.123856
Biological process	pyridine nucleotide metabolic process	GO:0019362	9	1.63539e-07	2.46551	31	63	1137	5697	>LE01Gene13132,>LE01Gene00256,>LE01Gene06393,>LE01Gene02390,>LE01Gene01422,>LE01Gene11222,>LE01Gene09790,>LE01Gene09791,>LE01Gene07114,>LE01Gene10334,>LE01Gene04902,>LE01Gene02725,>LE01Gene05356,>LE01Gene14216,>LE01Gene03960,>LE01Gene11106,>LE01Gene02678,>LE01Gene10632,>LE01Gene03058,>LE01Gene03056,>LE01Gene06597,>LE01Gene10629,>LE01Gene03019,>LE01Gene02144,>LE01Gene02540,>LE01Gene04720,>LE01Gene…	2.2105e-05		Molecular function	metal cluster binding	GO:0051540	3	0.0191968	2.0416	10	38	897	6959	>LE01Gene09851,>LE01Gene08075,>LE01Gene08034,>LE01Gene08432,>LE01Gene05778,>LE01Gene02208,>LE01Gene02186,>LE01Gene05255,>LE01Gene02945,>LE01Gene04286,	0.123856
Biological process	nicotinamide nucleotide metabolic process	GO:0046496	10	2.65128e-07	2.50528	29	58	1137	5697	>LE01Gene00256,>LE01Gene06393,>LE01Gene02390,>LE01Gene01422,>LE01Gene11222,>LE01Gene09790,>LE01Gene09791,>LE01Gene07114,>LE01Gene04902,>LE01Gene02725,>LE01Gene05356,>LE01Gene14216,>LE01Gene03960,>LE01Gene11106,>LE01Gene02678,>LE01Gene10632,>LE01Gene03058,>LE01Gene03056,>LE01Gene06597,>LE01Gene10629,>LE01Gene03019,>LE01Gene02144,>LE01Gene02540,>LE01Gene04720,>LE01Gene00733,>LE01Gene10999,>LE01Gene…	3.30798e-05		Molecular function	double-stranded DNA binding	GO:0003690	6	0.0212224	2.58603	6	18	897	6959	>LE01Gene01563,>LE01Gene03287,>LE01Gene08065,>LE01Gene11678,>LE01Gene02703,>LE01Gene07301,	0.124914
Biological process	NADP metabolic process	GO:0006739	11	5.64302e-07	3.27613	17	26	1137	5697	>LE01Gene00256,>LE01Gene06393,>LE01Gene11222,>LE01Gene09790,>LE01Gene04902,>LE01Gene02725,>LE01Gene11106,>LE01Gene02678,>LE01Gene10632,>LE01Gene03058,>LE01Gene06597,>LE01Gene10629,>LE01Gene02144,>LE01Gene00733,>LE01Gene10999,>LE01Gene01623,>LE01Gene05567,	6.53784e-05		Molecular function	protein kinase activity	GO:0004672	6	0.0221432	1.34275	45	260	897	6959	>LE01Gene01183,>LE01Gene01184,>LE01Gene12662,>LE01Gene10065,>LE01Gene01983,>LE01Gene02814,>LE01Gene06355,>LE01Gene10849,>LE01Gene01061,>LE01Gene02732,>LE01Gene04978,>LE01Gene11611,>LE01Gene02719,>LE01Gene13842,>LE01Gene02720,>LE01Gene02722,>LE01Gene06657,>LE01Gene03156,>LE01Gene04419,>LE01Gene13372,>LE01Gene00063,>LE01Gene10236,>LE01Gene03945,>LE01Gene11576,>LE01Gene06160,>LE01Gene09648,>LE01Gene…	0.129201
Biological process	cellular polysaccharide metabolic process	GO:0044264	6	7.36788e-07	2.24156	34	76	1137	5697	>LE01Gene06823,>LE01Gene12203,>LE01Gene05940,>LE01Gene12231,>LE01Gene02894,>LE01Gene10050,>LE01Gene01999,>LE01Gene08136,>LE01Gene12625,>LE01Gene07209,>LE01Gene04186,>LE01Gene04541,>LE01Gene03223,>LE01Gene04913,>LE01Gene02734,>LE01Gene01448,>LE01Gene09790,>LE01Gene11660,>LE01Gene12986,>LE01Gene12045,>LE01Gene02639,>LE01Gene04829,>LE01Gene09248,>LE01Gene13789,>LE01Gene12864,>LE01Gene05622,>LE01Gene…	7.96714e-05		Molecular function	guanyl nucleotide binding	GO:0019001	7	0.0226421	1.5035	25	129	897	6959	>LE01Gene03365,>LE01Gene03345,>LE01Gene10030,>LE01Gene09895,>LE01Gene08138,>LE01Gene01018,>LE01Gene01434,>LE01Gene01435,>LE01Gene10330,>LE01Gene09341,>LE01Gene10717,>LE01Gene08828,>LE01Gene05769,>LE01Gene01305,>LE01Gene04803,>LE01Gene11519,>LE01Gene10687,>LE01Gene03067,>LE01Gene00801,>LE01Gene05610,>LE01Gene03467,>LE01Gene05197,>LE01Gene08622,>LE01Gene07300,>LE01Gene09510,	0.130973
Biological process	small molecule metabolic process	GO:0044281	3	7.90298e-07	1.34479	197	734	1137	5697	>LE01Gene04653,>LE01Gene04654,>LE01Gene13132,>LE01Gene06818,>LE01Gene12254,>LE01Gene00290,>LE01Gene06881,>LE01Gene01199,>LE01Gene07739,>LE01Gene03342,>LE01Gene03348,>LE01Gene04205,>LE01Gene10024,>LE01Gene01520,>LE01Gene13510,>LE01Gene11339,>LE01Gene02434,>LE01Gene01586,>LE01Gene00256,>LE01Gene10058,>LE01Gene10056,>LE01Gene04619,>LE01Gene02448,>LE01Gene09080,>LE01Gene02893,>LE01Gene00628,>LE01Gene…	8.01164e-05		Molecular function	molecular transducer activity	GO:0060089	2	0.0258898	2.77074	5	14	897	6959	>LE01Gene05407,>LE01Gene09740,>LE01Gene08702,>LE01Gene08685,>LE01Gene08688,	0.148479
Biological process	polysaccharide catabolic process	GO:0000272	6	4.58927e-06	2.56354	22	43	1137	5697	>LE01Gene06823,>LE01Gene12231,>LE01Gene10050,>LE01Gene08136,>LE01Gene04186,>LE01Gene04541,>LE01Gene04104,>LE01Gene03223,>LE01Gene01448,>LE01Gene11660,>LE01Gene07975,>LE01Gene02639,>LE01Gene04829,>LE01Gene09249,>LE01Gene09248,>LE01Gene13789,>LE01Gene12864,>LE01Gene01683,>LE01Gene06083,>LE01Gene11400,>LE01Gene04232,>LE01Gene04299,	0.00043787		Molecular function	GTPase activity	GO:0003924	8	0.0306256	1.63328	16	76	897	6959	>LE01Gene03365,>LE01Gene10030,>LE01Gene09895,>LE01Gene08138,>LE01Gene01434,>LE01Gene01435,>LE01Gene10330,>LE01Gene10717,>LE01Gene08828,>LE01Gene04803,>LE01Gene11519,>LE01Gene10687,>LE01Gene05610,>LE01Gene03467,>LE01Gene08622,>LE01Gene09510,	0.168441
Biological process	monocarboxylic acid metabolic process	GO:0032787	7	6.90939e-06	1.82202	48	132	1137	5697	>LE01Gene00256,>LE01Gene10056,>LE01Gene09080,>LE01Gene01966,>LE01Gene08952,>LE01Gene01907,>LE01Gene07676,>LE01Gene02390,>LE01Gene11222,>LE01Gene01407,>LE01Gene02780,>LE01Gene04966,>LE01Gene09790,>LE01Gene07108,>LE01Gene07114,>LE01Gene04902,>LE01Gene14216,>LE01Gene01364,>LE01Gene03960,>LE01Gene09272,>LE01Gene03949,>LE01Gene12831,>LE01Gene10632,>LE01Gene03045,>LE01Gene03056,>LE01Gene02192,>LE01Gene…	0.000622613		Molecular function	transferase activity, transferring alkyl or aryl (other than methyl) groups	GO:0016765	4	0.0321036	2.06882	8	30	897	6959	>LE01Gene09436,>LE01Gene05036,>LE01Gene10315,>LE01Gene04019,>LE01Gene07511,>LE01Gene04870,>LE01Gene03117,>LE01Gene07419,	0.175134
Biological process	glucan metabolic process	GO:0044042	6	7.45825e-06	2.20161	29	66	1137	5697	>LE01Gene12203,>LE01Gene05940,>LE01Gene12231,>LE01Gene02894,>LE01Gene10050,>LE01Gene01999,>LE01Gene08136,>LE01Gene12625,>LE01Gene07209,>LE01Gene04186,>LE01Gene04541,>LE01Gene04913,>LE01Gene02734,>LE01Gene09790,>LE01Gene11660,>LE01Gene12986,>LE01Gene04829,>LE01Gene09248,>LE01Gene13789,>LE01Gene12864,>LE01Gene05622,>LE01Gene03019,>LE01Gene03020,>LE01Gene06973,>LE01Gene13684,>LE01Gene09188,>LE01Gene…	0.000636699		Molecular function	DNA helicase activity	GO:0003678	6	0.0342721	1.75655	12	53	897	6959	>LE01Gene03366,>LE01Gene10059,>LE01Gene00240,>LE01Gene08526,>LE01Gene02350,>LE01Gene08065,>LE01Gene00959,>LE01Gene11651,>LE01Gene07551,>LE01Gene00925,>LE01Gene02290,>LE01Gene06943,	0.185456
Biological process	monosaccharide metabolic process	GO:0005996	5	9.59769e-06	2.14738	30	70	1137	5697	>LE01Gene06393,>LE01Gene01999,>LE01Gene00638,>LE01Gene02390,>LE01Gene11222,>LE01Gene09790,>LE01Gene07114,>LE01Gene04902,>LE01Gene05323,>LE01Gene04060,>LE01Gene08877,>LE01Gene14216,>LE01Gene03960,>LE01Gene02678,>LE01Gene09692,>LE01Gene13706,>LE01Gene03056,>LE01Gene04353,>LE01Gene06597,>LE01Gene11927,>LE01Gene03017,>LE01Gene03019,>LE01Gene00332,>LE01Gene04720,>LE01Gene00733,>LE01Gene01623,>LE01Gene…	0.000778373		Molecular function	metallopeptidase activity	GO:0008237	5	0.0352031	1.93952	9	36	897	6959	>LE01Gene02392,>LE01Gene07593,>LE01Gene09222,>LE01Gene05212,>LE01Gene12334,>LE01Gene00365,>LE01Gene13675,>LE01Gene00730,>LE01Gene10548,	0.18897
Biological process	disaccharide metabolic process	GO:0005984	6	9.66184e-06	2.28552	26	57	1137	5697	>LE01Gene12203,>LE01Gene05940,>LE01Gene12231,>LE01Gene02894,>LE01Gene10050,>LE01Gene01999,>LE01Gene00638,>LE01Gene08136,>LE01Gene12625,>LE01Gene07209,>LE01Gene04186,>LE01Gene04541,>LE01Gene13404,>LE01Gene04913,>LE01Gene02734,>LE01Gene09790,>LE01Gene12986,>LE01Gene13789,>LE01Gene05622,>LE01Gene05620,>LE01Gene03019,>LE01Gene03020,>LE01Gene06973,>LE01Gene13684,>LE01Gene09188,>LE01Gene05567,	0.000746262		Molecular function	DNA-directed DNA polymerase activity	GO:0003887	7	0.0354162	2.32742	6	20	897	6959	>LE01Gene00640,>LE01Gene04172,>LE01Gene12179,>LE01Gene03549,>LE01Gene05682,>LE01Gene07785,	0.188605
Biological process	obsolete oxidoreduction coenzyme metabolic process	GO:0006733	0	1.06251e-05	2.08231	32	77	1137	5697	>LE01Gene13132,>LE01Gene00256,>LE01Gene06393,>LE01Gene02390,>LE01Gene01422,>LE01Gene11222,>LE01Gene09790,>LE01Gene09791,>LE01Gene11602,>LE01Gene07114,>LE01Gene10334,>LE01Gene04902,>LE01Gene02725,>LE01Gene05356,>LE01Gene14216,>LE01Gene03960,>LE01Gene11106,>LE01Gene02678,>LE01Gene10632,>LE01Gene03058,>LE01Gene03056,>LE01Gene06597,>LE01Gene10629,>LE01Gene03019,>LE01Gene02144,>LE01Gene02540,>LE01Gene…	0.000783362		Molecular function	catalytic activity, acting on a protein	GO:0140096	3	0.036194	1.18426	98	642	897	6959	>LE01Gene06843,>LE01Gene05510,>LE01Gene14433,>LE01Gene02037,>LE01Gene02019,>LE01Gene14484,>LE01Gene01183,>LE01Gene01184,>LE01Gene12662,>LE01Gene10065,>LE01Gene01983,>LE01Gene00667,>LE01Gene02814,>LE01Gene07627,>LE01Gene06355,>LE01Gene10849,>LE01Gene08906,>LE01Gene12167,>LE01Gene01061,>LE01Gene02392,>LE01Gene03606,>LE01Gene13882,>LE01Gene01437,>LE01Gene02732,>LE01Gene04978,>LE01Gene03639,>LE01Gene…	0.19123
Biological process	cellular glucan metabolic process	GO:0006073	7	1.68817e-05	2.15839	28	65	1137	5697	>LE01Gene12203,>LE01Gene05940,>LE01Gene12231,>LE01Gene02894,>LE01Gene10050,>LE01Gene01999,>LE01Gene08136,>LE01Gene12625,>LE01Gene07209,>LE01Gene04186,>LE01Gene04541,>LE01Gene04913,>LE01Gene02734,>LE01Gene09790,>LE01Gene11660,>LE01Gene12986,>LE01Gene04829,>LE01Gene09248,>LE01Gene13789,>LE01Gene12864,>LE01Gene05622,>LE01Gene03019,>LE01Gene03020,>LE01Gene06973,>LE01Gene13684,>LE01Gene09188,>LE01Gene…	0.00119052		Molecular function	acyltransferase activity	GO:0016746	4	0.0367141	1.49468	21	109	897	6959	>LE01Gene01135,>LE01Gene01193,>LE01Gene02494,>LE01Gene00674,>LE01Gene13988,>LE01Gene06317,>LE01Gene05000,>LE01Gene02324,>LE01Gene10348,>LE01Gene09361,>LE01Gene08854,>LE01Gene08839,>LE01Gene04482,>LE01Gene04875,>LE01Gene08749,>LE01Gene03065,>LE01Gene07877,>LE01Gene03424,>LE01Gene01288,>LE01Gene03843,>LE01Gene08296,	0.192462
Biological process	hexose metabolic process	GO:0019318	6	2.38252e-05	2.12569	28	66	1137	5697	>LE01Gene01999,>LE01Gene00638,>LE01Gene02390,>LE01Gene11222,>LE01Gene09790,>LE01Gene07114,>LE01Gene04902,>LE01Gene05323,>LE01Gene04060,>LE01Gene08877,>LE01Gene14216,>LE01Gene03960,>LE01Gene02678,>LE01Gene13706,>LE01Gene03056,>LE01Gene04353,>LE01Gene06597,>LE01Gene11927,>LE01Gene03017,>LE01Gene03019,>LE01Gene00332,>LE01Gene04720,>LE01Gene00733,>LE01Gene01623,>LE01Gene08279,>LE01Gene11898,>LE01Gene…	0.00161019		Molecular function	hydrolase activity, acting on ester bonds	GO:0016788	4	0.0380333	1.28844	47	283	897	6959	>LE01Gene05510,>LE01Gene07713,>LE01Gene00690,>LE01Gene01539,>LE01Gene00230,>LE01Gene00240,>LE01Gene11755,>LE01Gene10454,>LE01Gene00667,>LE01Gene11776,>LE01Gene04172,>LE01Gene05877,>LE01Gene11291,>LE01Gene13050,>LE01Gene03606,>LE01Gene08071,>LE01Gene01463,>LE01Gene01474,>LE01Gene04982,>LE01Gene11252,>LE01Gene01833,>LE01Gene02727,>LE01Gene10312,>LE01Gene11659,>LE01Gene08868,>LE01Gene05327,>LE01Gene…	0.197832
Biological process	obsolete cofactor metabolic process	GO:0051186	0	2.74098e-05	1.62576	61	188	1137	5697	>LE01Gene05509,>LE01Gene13132,>LE01Gene01167,>LE01Gene00256,>LE01Gene10058,>LE01Gene09060,>LE01Gene06393,>LE01Gene13915,>LE01Gene01984,>LE01Gene01988,>LE01Gene10457,>LE01Gene10823,>LE01Gene08952,>LE01Gene01907,>LE01Gene05032,>LE01Gene08997,>LE01Gene02390,>LE01Gene01422,>LE01Gene11222,>LE01Gene09790,>LE01Gene09791,>LE01Gene11602,>LE01Gene07114,>LE01Gene10334,>LE01Gene01873,>LE01Gene04902,>LE01Gene…	0.00177835		Molecular function	ligase activity	GO:0016874	3	0.0385517	1.40146	28	155	897	6959	>LE01Gene01983,>LE01Gene11776,>LE01Gene10827,>LE01Gene05453,>LE01Gene13008,>LE01Gene08949,>LE01Gene01885,>LE01Gene03653,>LE01Gene09305,>LE01Gene11677,>LE01Gene05332,>LE01Gene05745,>LE01Gene02226,>LE01Gene03142,>LE01Gene03585,>LE01Gene06610,>LE01Gene01780,>LE01Gene01789,>LE01Gene12436,>LE01Gene00431,>LE01Gene03503,>LE01Gene10685,>LE01Gene03065,>LE01Gene03007,>LE01Gene03881,>LE01Gene11484,>LE01Gene…	0.198986
Biological process	oligosaccharide metabolic process	GO:0009311	5	2.96767e-05	2.17124	26	60	1137	5697	>LE01Gene12203,>LE01Gene05940,>LE01Gene12231,>LE01Gene02894,>LE01Gene10050,>LE01Gene01999,>LE01Gene00638,>LE01Gene08136,>LE01Gene12625,>LE01Gene07209,>LE01Gene04186,>LE01Gene04541,>LE01Gene13404,>LE01Gene04913,>LE01Gene02734,>LE01Gene09790,>LE01Gene12986,>LE01Gene13789,>LE01Gene05622,>LE01Gene05620,>LE01Gene03019,>LE01Gene03020,>LE01Gene06973,>LE01Gene13684,>LE01Gene09188,>LE01Gene05567,	0.00185137		Molecular function	protein dimerization activity	GO:0046983	4	0.0391208	1.64565	14	66	897	6959	>LE01Gene12270,>LE01Gene01532,>LE01Gene12144,>LE01Gene02732,>LE01Gene08055,>LE01Gene03650,>LE01Gene13783,>LE01Gene13301,>LE01Gene13300,>LE01Gene13784,>LE01Gene03840,>LE01Gene03839,>LE01Gene00741,>LE01Gene00778,	0.200382
Biological process	carbohydrate derivative metabolic process	GO:1901135	4	6.78484e-05	1.49169	78	262	1137	5697	>LE01Gene13132,>LE01Gene06818,>LE01Gene12254,>LE01Gene13510,>LE01Gene02434,>LE01Gene01586,>LE01Gene00256,>LE01Gene02420,>LE01Gene06379,>LE01Gene06393,>LE01Gene01999,>LE01Gene10460,>LE01Gene00638,>LE01Gene07656,>LE01Gene04192,>LE01Gene11712,>LE01Gene00185,>LE01Gene01078,>LE01Gene06745,>LE01Gene02390,>LE01Gene11222,>LE01Gene00134,>LE01Gene00116,>LE01Gene09790,>LE01Gene10788,>LE01Gene13816,>LE01Gene…	0.00407593		Molecular function	transferase activity, transferring one-carbon groups	GO:0016741	4	0.0422156	1.43226	24	130	897	6959	>LE01Gene13145,>LE01Gene14484,>LE01Gene10887,>LE01Gene01014,>LE01Gene00148,>LE01Gene03658,>LE01Gene12036,>LE01Gene11176,>LE01Gene03965,>LE01Gene01309,>LE01Gene13331,>LE01Gene00860,>LE01Gene12855,>LE01Gene11913,>LE01Gene05248,>LE01Gene02146,>LE01Gene05661,>LE01Gene00780,>LE01Gene11414,>LE01Gene04255,>LE01Gene04235,>LE01Gene10911,>LE01Gene05162,>LE01Gene06468,	0.214596
Biological process	starch metabolic process	GO:0005982	8	8.26865e-05	2.17439	23	53	1137	5697	>LE01Gene12203,>LE01Gene05940,>LE01Gene12231,>LE01Gene02894,>LE01Gene10050,>LE01Gene01999,>LE01Gene08136,>LE01Gene12625,>LE01Gene07209,>LE01Gene04186,>LE01Gene04541,>LE01Gene04913,>LE01Gene02734,>LE01Gene09790,>LE01Gene12986,>LE01Gene13789,>LE01Gene05622,>LE01Gene03019,>LE01Gene03020,>LE01Gene06973,>LE01Gene13684,>LE01Gene09188,>LE01Gene05567,	0.00478991		Molecular function	NAD binding	GO:0051287	6	0.0482883	1.83744	9	38	897	6959	>LE01Gene12270,>LE01Gene01549,>LE01Gene01574,>LE01Gene06353,>LE01Gene05421,>LE01Gene10351,>LE01Gene01462,>LE01Gene03650,>LE01Gene08432,	0.231439
Biological process	sucrose metabolic process	GO:0005985	7	8.26865e-05	2.17439	23	53	1137	5697	>LE01Gene12203,>LE01Gene05940,>LE01Gene12231,>LE01Gene02894,>LE01Gene10050,>LE01Gene01999,>LE01Gene08136,>LE01Gene12625,>LE01Gene07209,>LE01Gene04186,>LE01Gene04541,>LE01Gene04913,>LE01Gene02734,>LE01Gene09790,>LE01Gene12986,>LE01Gene13789,>LE01Gene05622,>LE01Gene03019,>LE01Gene03020,>LE01Gene06973,>LE01Gene13684,>LE01Gene09188,>LE01Gene05567,	0.00478991		Molecular function	kinase activity	GO:0016301	5	0.0496797	1.23523	57	358	897	6959	>LE01Gene12270,>LE01Gene01183,>LE01Gene01184,>LE01Gene12662,>LE01Gene10065,>LE01Gene01983,>LE01Gene02814,>LE01Gene06315,>LE01Gene06355,>LE01Gene10849,>LE01Gene01014,>LE01Gene01061,>LE01Gene02732,>LE01Gene05820,>LE01Gene04978,>LE01Gene11611,>LE01Gene09300,>LE01Gene02719,>LE01Gene13842,>LE01Gene02720,>LE01Gene02722,>LE01Gene06657,>LE01Gene03156,>LE01Gene04419,>LE01Gene13372,>LE01Gene00063,>LE01Gene…	0.236419
Biological process	pyruvate metabolic process	GO:0006090	8	0.000100523	2.23876	21	47	1137	5697	>LE01Gene10056,>LE01Gene02390,>LE01Gene11222,>LE01Gene04966,>LE01Gene09790,>LE01Gene07108,>LE01Gene07114,>LE01Gene04902,>LE01Gene14216,>LE01Gene01364,>LE01Gene03960,>LE01Gene03949,>LE01Gene03056,>LE01Gene06597,>LE01Gene03019,>LE01Gene00332,>LE01Gene04720,>LE01Gene00733,>LE01Gene11424,>LE01Gene08279,>LE01Gene05567,	0.00543495		Cellular component	mitochondrion	GO:0005739	6	4.77396e-15	2.89311	53	112	466	2849	>LE01Gene03323,>LE01Gene14438,>LE01Gene12270,>LE01Gene09041,>LE01Gene02435,>LE01Gene12240,>LE01Gene09893,>LE01Gene07270,>LE01Gene06315,>LE01Gene07645,>LE01Gene11700,>LE01Gene07697,>LE01Gene13008,>LE01Gene01014,>LE01Gene03245,>LE01Gene04586,>LE01Gene01076,>LE01Gene02392,>LE01Gene12551,>LE01Gene08075,>LE01Gene01885,>LE01Gene08056,>LE01Gene14307,>LE01Gene10312,>LE01Gene10325,>LE01Gene08419,>LE01Gene…	1.74727e-12
Biological process	glycosyl compound metabolic process	GO:1901657	5	0.000126506	2.69799	14	26	1137	5697	>LE01Gene13132,>LE01Gene12254,>LE01Gene13510,>LE01Gene02434,>LE01Gene06379,>LE01Gene01078,>LE01Gene00116,>LE01Gene09790,>LE01Gene10334,>LE01Gene14276,>LE01Gene12908,>LE01Gene02239,>LE01Gene07910,>LE01Gene03019,	0.00661913		Cellular component	obsolete intracellular organelle part	GO:0044446	0	4.55191e-14	1.66353	157	577	466	2849	>LE01Gene03323,>LE01Gene01152,>LE01Gene02484,>LE01Gene05510,>LE01Gene14433,>LE01Gene14438,>LE01Gene03366,>LE01Gene05546,>LE01Gene02019,>LE01Gene04206,>LE01Gene13528,>LE01Gene09041,>LE01Gene01532,>LE01Gene02435,>LE01Gene10059,>LE01Gene01107,>LE01Gene10066,>LE01Gene01563,>LE01Gene02417,>LE01Gene00242,>LE01Gene04609,>LE01Gene09893,>LE01Gene13972,>LE01Gene07270,>LE01Gene11772,>LE01Gene06315,>LE01Gene…	8.33e-12
Biological process	purine-containing compound biosynthetic process	GO:0072522	6	0.000131675	1.98948	27	68	1137	5697	>LE01Gene06818,>LE01Gene02434,>LE01Gene01586,>LE01Gene10460,>LE01Gene02390,>LE01Gene11222,>LE01Gene09790,>LE01Gene00950,>LE01Gene07114,>LE01Gene10334,>LE01Gene07172,>LE01Gene04902,>LE01Gene09327,>LE01Gene05330,>LE01Gene14216,>LE01Gene07910,>LE01Gene03960,>LE01Gene00453,>LE01Gene03056,>LE01Gene06597,>LE01Gene03019,>LE01Gene06507,>LE01Gene04720,>LE01Gene04726,>LE01Gene00733,>LE01Gene08279,>LE01Gene…	0.0066743		Cellular component	obsolete organelle part	GO:0044422	0	5.37348e-14	1.66065	157	578	466	2849	>LE01Gene03323,>LE01Gene01152,>LE01Gene02484,>LE01Gene05510,>LE01Gene14433,>LE01Gene14438,>LE01Gene03366,>LE01Gene05546,>LE01Gene02019,>LE01Gene04206,>LE01Gene13528,>LE01Gene09041,>LE01Gene01532,>LE01Gene02435,>LE01Gene10059,>LE01Gene01107,>LE01Gene10066,>LE01Gene01563,>LE01Gene02417,>LE01Gene00242,>LE01Gene04609,>LE01Gene09893,>LE01Gene13972,>LE01Gene07270,>LE01Gene11772,>LE01Gene06315,>LE01Gene…	6.55564e-12
Biological process	cellular response to chemical stimulus	GO:0070887	4	0.000149565	1.434	85	297	1137	5697	>LE01Gene13132,>LE01Gene00290,>LE01Gene06881,>LE01Gene03342,>LE01Gene10024,>LE01Gene01520,>LE01Gene13508,>LE01Gene01586,>LE01Gene02448,>LE01Gene02893,>LE01Gene02418,>LE01Gene09060,>LE01Gene00628,>LE01Gene01966,>LE01Gene09830,>LE01Gene07656,>LE01Gene05481,>LE01Gene07630,>LE01Gene07632,>LE01Gene08962,>LE01Gene04182,>LE01Gene11712,>LE01Gene10868,>LE01Gene08997,>LE01Gene00185,>LE01Gene07614,>LE01Gene…	0.00735134		Cellular component	obsolete mitochondrial part	GO:0044429	0	1.8362e-12	3.13948	38	74	466	2849	>LE01Gene03323,>LE01Gene09041,>LE01Gene02435,>LE01Gene09893,>LE01Gene06315,>LE01Gene07645,>LE01Gene11700,>LE01Gene07697,>LE01Gene13008,>LE01Gene03245,>LE01Gene04586,>LE01Gene01076,>LE01Gene02392,>LE01Gene12551,>LE01Gene01885,>LE01Gene08056,>LE01Gene14307,>LE01Gene08419,>LE01Gene00937,>LE01Gene04875,>LE01Gene02289,>LE01Gene13399,>LE01Gene00461,>LE01Gene02208,>LE01Gene10655,>LE01Gene03934,>LE01Gene…	1.68012e-10
Biological process	organic hydroxy compound metabolic process	GO:1901615	4	0.000160478	2.22691	20	45	1137	5697	>LE01Gene03342,>LE01Gene05481,>LE01Gene10868,>LE01Gene08530,>LE01Gene11222,>LE01Gene09790,>LE01Gene01873,>LE01Gene04902,>LE01Gene06236,>LE01Gene03960,>LE01Gene06597,>LE01Gene05620,>LE01Gene03019,>LE01Gene02135,>LE01Gene02142,>LE01Gene08279,>LE01Gene11898,>LE01Gene05579,>LE01Gene04299,>LE01Gene05151,	0.00765574		Cellular component	obsolete cytoplasmic part	GO:0044444	0	8.59263e-11	1.56844	147	573	466	2849	>LE01Gene03323,>LE01Gene06839,>LE01Gene01152,>LE01Gene02484,>LE01Gene14438,>LE01Gene12270,>LE01Gene04224,>LE01Gene04206,>LE01Gene13528,>LE01Gene01553,>LE01Gene09041,>LE01Gene02435,>LE01Gene01107,>LE01Gene12240,>LE01Gene00242,>LE01Gene01578,>LE01Gene09893,>LE01Gene13972,>LE01Gene01960,>LE01Gene07270,>LE01Gene12618,>LE01Gene11772,>LE01Gene06315,>LE01Gene06313,>LE01Gene07645,>LE01Gene09867,>LE01Gene…	6.2898e-09
Biological process	xenobiotic metabolic process	GO:0006805	4	0.000165181	1.44432	81	281	1137	5697	>LE01Gene13132,>LE01Gene00290,>LE01Gene06881,>LE01Gene03342,>LE01Gene10024,>LE01Gene01520,>LE01Gene01586,>LE01Gene02448,>LE01Gene02893,>LE01Gene02418,>LE01Gene09060,>LE01Gene00628,>LE01Gene01966,>LE01Gene09830,>LE01Gene07656,>LE01Gene05481,>LE01Gene07630,>LE01Gene07632,>LE01Gene08962,>LE01Gene04182,>LE01Gene11712,>LE01Gene10868,>LE01Gene08997,>LE01Gene00185,>LE01Gene07614,>LE01Gene02390,>LE01Gene…	0.00765497		Cellular component	organelle membrane	GO:0031090	4	3.29615e-10	2.25675	55	149	466	2849	>LE01Gene01152,>LE01Gene04206,>LE01Gene13528,>LE01Gene09041,>LE01Gene02435,>LE01Gene01107,>LE01Gene09893,>LE01Gene13972,>LE01Gene07270,>LE01Gene11772,>LE01Gene06315,>LE01Gene06313,>LE01Gene11700,>LE01Gene07697,>LE01Gene06352,>LE01Gene13008,>LE01Gene00183,>LE01Gene03245,>LE01Gene04586,>LE01Gene07617,>LE01Gene01081,>LE01Gene12551,>LE01Gene13887,>LE01Gene01885,>LE01Gene08056,>LE01Gene14307,>LE01Gene…	2.01065e-08
Biological process	cellular response to xenobiotic stimulus	GO:0071466	5	0.000183222	1.43659	82	286	1137	5697	>LE01Gene13132,>LE01Gene00290,>LE01Gene06881,>LE01Gene03342,>LE01Gene10024,>LE01Gene01520,>LE01Gene13508,>LE01Gene01586,>LE01Gene02448,>LE01Gene02893,>LE01Gene02418,>LE01Gene09060,>LE01Gene00628,>LE01Gene01966,>LE01Gene09830,>LE01Gene07656,>LE01Gene05481,>LE01Gene07630,>LE01Gene07632,>LE01Gene08962,>LE01Gene04182,>LE01Gene11712,>LE01Gene10868,>LE01Gene08997,>LE01Gene00185,>LE01Gene07614,>LE01Gene…	0.00825518		Cellular component	organelle envelope	GO:0031967	4	5.83483e-10	2.78601	36	79	466	2849	>LE01Gene09041,>LE01Gene02435,>LE01Gene09893,>LE01Gene06315,>LE01Gene11700,>LE01Gene07697,>LE01Gene13008,>LE01Gene03245,>LE01Gene14383,>LE01Gene04586,>LE01Gene01076,>LE01Gene12551,>LE01Gene01885,>LE01Gene01892,>LE01Gene08056,>LE01Gene14308,>LE01Gene14307,>LE01Gene08419,>LE01Gene00937,>LE01Gene02289,>LE01Gene02208,>LE01Gene10655,>LE01Gene01740,>LE01Gene03934,>LE01Gene09688,>LE01Gene03081,>LE01Gene…	3.05078e-08
Biological process	hydrocarbon metabolic process	GO:0120252	4	0.000184224	2.86317	12	21	1137	5697	>LE01Gene01966,>LE01Gene05481,>LE01Gene09818,>LE01Gene10868,>LE01Gene03960,>LE01Gene02634,>LE01Gene00476,>LE01Gene02142,>LE01Gene12309,>LE01Gene03875,>LE01Gene08279,>LE01Gene04245,	0.00807599		Cellular component	envelope	GO:0031975	3	9.01831e-10	2.75118	36	80	466	2849	>LE01Gene09041,>LE01Gene02435,>LE01Gene09893,>LE01Gene06315,>LE01Gene11700,>LE01Gene07697,>LE01Gene13008,>LE01Gene03245,>LE01Gene14383,>LE01Gene04586,>LE01Gene01076,>LE01Gene12551,>LE01Gene01885,>LE01Gene01892,>LE01Gene08056,>LE01Gene14308,>LE01Gene14307,>LE01Gene08419,>LE01Gene00937,>LE01Gene02289,>LE01Gene02208,>LE01Gene10655,>LE01Gene01740,>LE01Gene03934,>LE01Gene09688,>LE01Gene03081,>LE01Gene…	4.12588e-08
Biological process	response to xenobiotic stimulus	GO:0009410	4	0.000202575	1.42913	83	291	1137	5697	>LE01Gene13132,>LE01Gene00290,>LE01Gene06881,>LE01Gene03342,>LE01Gene10024,>LE01Gene01520,>LE01Gene13508,>LE01Gene01586,>LE01Gene02448,>LE01Gene02893,>LE01Gene02418,>LE01Gene09060,>LE01Gene00628,>LE01Gene01966,>LE01Gene09830,>LE01Gene07656,>LE01Gene05481,>LE01Gene07630,>LE01Gene07632,>LE01Gene08962,>LE01Gene04182,>LE01Gene11712,>LE01Gene10868,>LE01Gene08997,>LE01Gene00185,>LE01Gene07614,>LE01Gene…	0.00864676		Cellular component	mitochondrial envelope	GO:0005740	5	3.35977e-09	3.00506	29	59	466	2849	>LE01Gene09041,>LE01Gene02435,>LE01Gene09893,>LE01Gene06315,>LE01Gene11700,>LE01Gene07697,>LE01Gene13008,>LE01Gene03245,>LE01Gene04586,>LE01Gene01076,>LE01Gene12551,>LE01Gene01885,>LE01Gene08056,>LE01Gene14307,>LE01Gene08419,>LE01Gene00937,>LE01Gene02289,>LE01Gene02208,>LE01Gene10655,>LE01Gene03934,>LE01Gene09688,>LE01Gene13274,>LE01Gene04708,>LE01Gene02509,>LE01Gene09140,>LE01Gene01224,>LE01Gene…	1.36631e-07
Biological process	purine nucleotide biosynthetic process	GO:0006164	10	0.000203186	1.97385	26	66	1137	5697	>LE01Gene06818,>LE01Gene02434,>LE01Gene01586,>LE01Gene10460,>LE01Gene02390,>LE01Gene11222,>LE01Gene09790,>LE01Gene00950,>LE01Gene07114,>LE01Gene07172,>LE01Gene04902,>LE01Gene09327,>LE01Gene05330,>LE01Gene14216,>LE01Gene07910,>LE01Gene03960,>LE01Gene00453,>LE01Gene03056,>LE01Gene06597,>LE01Gene03019,>LE01Gene06507,>LE01Gene04720,>LE01Gene04726,>LE01Gene00733,>LE01Gene08279,>LE01Gene05567,	0.00845046		Cellular component	mitochondrial inner membrane	GO:0005743	6	1.01598e-08	3.56634	21	36	466	2849	>LE01Gene09041,>LE01Gene02435,>LE01Gene09893,>LE01Gene06315,>LE01Gene11700,>LE01Gene13008,>LE01Gene03245,>LE01Gene04586,>LE01Gene12551,>LE01Gene01885,>LE01Gene08056,>LE01Gene14307,>LE01Gene08419,>LE01Gene02289,>LE01Gene02208,>LE01Gene03934,>LE01Gene04708,>LE01Gene02509,>LE01Gene09140,>LE01Gene01224,>LE01Gene04234,	3.71848e-07
Biological process	transmembrane transport	GO:0055085	5	0.000245334	1.32135	125	474	1137	5697	>LE01Gene05504,>LE01Gene06812,>LE01Gene02405,>LE01Gene12209,>LE01Gene00682,>LE01Gene00206,>LE01Gene11335,>LE01Gene05946,>LE01Gene09063,>LE01Gene09437,>LE01Gene08555,>LE01Gene06392,>LE01Gene11300,>LE01Gene08151,>LE01Gene04136,>LE01Gene13090,>LE01Gene06321,>LE01Gene04140,>LE01Gene06322,>LE01Gene04153,>LE01Gene06774,>LE01Gene06781,>LE01Gene05033,>LE01Gene11712,>LE01Gene01038,>LE01Gene06727,>LE01Gene…	0.00994827		Cellular component	mitochondrial membrane	GO:0031966	5	1.42739e-08	3.05687	26	52	466	2849	>LE01Gene09041,>LE01Gene02435,>LE01Gene09893,>LE01Gene06315,>LE01Gene11700,>LE01Gene07697,>LE01Gene13008,>LE01Gene03245,>LE01Gene04586,>LE01Gene12551,>LE01Gene01885,>LE01Gene08056,>LE01Gene14307,>LE01Gene08419,>LE01Gene00937,>LE01Gene02289,>LE01Gene02208,>LE01Gene03934,>LE01Gene09688,>LE01Gene04708,>LE01Gene02509,>LE01Gene09140,>LE01Gene01224,>LE01Gene00747,>LE01Gene04234,>LE01Gene09510,	4.74933e-07
Biological process	nucleobase-containing small molecule biosynthetic process	GO:0034404	7	0.000257557	2.07985	22	53	1137	5697	>LE01Gene02434,>LE01Gene01078,>LE01Gene02390,>LE01Gene11222,>LE01Gene09790,>LE01Gene07114,>LE01Gene10334,>LE01Gene04902,>LE01Gene12908,>LE01Gene02239,>LE01Gene14216,>LE01Gene07910,>LE01Gene03960,>LE01Gene11106,>LE01Gene10241,>LE01Gene03056,>LE01Gene06597,>LE01Gene03019,>LE01Gene04720,>LE01Gene00733,>LE01Gene08279,>LE01Gene05567,	0.0101892		Cellular component	oxidoreductase complex	GO:1990204	4	2.4362e-08	3.99744	17	26	466	2849	>LE01Gene06839,>LE01Gene04224,>LE01Gene01553,>LE01Gene02435,>LE01Gene05850,>LE01Gene08075,>LE01Gene09374,>LE01Gene03650,>LE01Gene02208,>LE01Gene10284,>LE01Gene06114,>LE01Gene03424,>LE01Gene01259,>LE01Gene03468,>LE01Gene03843,>LE01Gene02509,>LE01Gene11013,	7.4304e-07
Biological process	cellular alkane metabolic process	GO:0043446	5	0.000305605	3.8971	7	9	1137	5697	>LE01Gene01966,>LE01Gene05481,>LE01Gene09818,>LE01Gene10868,>LE01Gene00476,>LE01Gene12309,>LE01Gene04245,	0.0118022		Cellular component	membrane	GO:0016020	3	5.64365e-08	1.31719	212	984	466	2849	>LE01Gene00297,>LE01Gene01152,>LE01Gene02484,>LE01Gene01153,>LE01Gene05511,>LE01Gene00276,>LE01Gene01123,>LE01Gene05547,>LE01Gene06407,>LE01Gene03381,>LE01Gene12299,>LE01Gene04206,>LE01Gene14484,>LE01Gene13528,>LE01Gene09041,>LE01Gene12689,>LE01Gene14838,>LE01Gene01533,>LE01Gene02435,>LE01Gene00254,>LE01Gene01107,>LE01Gene10064,>LE01Gene12240,>LE01Gene12249,>LE01Gene00231,>LE01Gene12697,>LE01Gene…	1.5889e-06
Biological process	methane metabolic process	GO:0015947	6	0.000305605	3.8971	7	9	1137	5697	>LE01Gene01966,>LE01Gene05481,>LE01Gene09818,>LE01Gene10868,>LE01Gene00476,>LE01Gene12309,>LE01Gene04245,	0.0118022		Cellular component	organelle inner membrane	GO:0019866	5	6.98754e-08	3.29201	21	39	466	2849	>LE01Gene09041,>LE01Gene02435,>LE01Gene09893,>LE01Gene06315,>LE01Gene11700,>LE01Gene13008,>LE01Gene03245,>LE01Gene04586,>LE01Gene12551,>LE01Gene01885,>LE01Gene08056,>LE01Gene14307,>LE01Gene08419,>LE01Gene02289,>LE01Gene02208,>LE01Gene03934,>LE01Gene04708,>LE01Gene02509,>LE01Gene09140,>LE01Gene01224,>LE01Gene04234,	1.82674e-06
Biological process	organic cyclic compound catabolic process	GO:1901361	5	0.00031516	1.77794	33	93	1137	5697	>LE01Gene05977,>LE01Gene09080,>LE01Gene09060,>LE01Gene08997,>LE01Gene02390,>LE01Gene11222,>LE01Gene00116,>LE01Gene09790,>LE01Gene07114,>LE01Gene04902,>LE01Gene10314,>LE01Gene02230,>LE01Gene14216,>LE01Gene03960,>LE01Gene02634,>LE01Gene11106,>LE01Gene10241,>LE01Gene03056,>LE01Gene06597,>LE01Gene05620,>LE01Gene02129,>LE01Gene03019,>LE01Gene02142,>LE01Gene06992,>LE01Gene03883,>LE01Gene02540,>LE01Gene…	0.0116179		Cellular component	cytoplasm	GO:0005737	3	1.9995e-07	1.36935	170	759	466	2849	>LE01Gene03323,>LE01Gene06839,>LE01Gene06843,>LE01Gene01152,>LE01Gene02484,>LE01Gene14438,>LE01Gene00288,>LE01Gene12270,>LE01Gene04224,>LE01Gene04206,>LE01Gene13528,>LE01Gene01553,>LE01Gene09041,>LE01Gene02435,>LE01Gene01107,>LE01Gene12240,>LE01Gene00242,>LE01Gene01578,>LE01Gene09893,>LE01Gene13972,>LE01Gene01960,>LE01Gene07270,>LE01Gene12618,>LE01Gene11772,>LE01Gene11776,>LE01Gene06315,>LE01Gene…	4.87877e-06
Biological process	organic acid metabolic process	GO:0006082	4	0.00032603	1.31304	125	477	1137	5697	>LE01Gene06881,>LE01Gene01199,>LE01Gene07739,>LE01Gene03348,>LE01Gene04205,>LE01Gene01520,>LE01Gene01586,>LE01Gene00256,>LE01Gene10058,>LE01Gene10056,>LE01Gene04619,>LE01Gene02448,>LE01Gene09080,>LE01Gene02893,>LE01Gene00628,>LE01Gene02831,>LE01Gene10460,>LE01Gene11318,>LE01Gene01966,>LE01Gene01963,>LE01Gene06329,>LE01Gene08952,>LE01Gene07630,>LE01Gene07632,>LE01Gene01907,>LE01Gene04182,>LE01Gene…	0.0117516		Cellular component	obsolete membrane part	GO:0044425	0	2.01635e-07	1.37314	168	748	466	2849	>LE01Gene00297,>LE01Gene01152,>LE01Gene01153,>LE01Gene00276,>LE01Gene05547,>LE01Gene06407,>LE01Gene12299,>LE01Gene04206,>LE01Gene14484,>LE01Gene13528,>LE01Gene09041,>LE01Gene12689,>LE01Gene14838,>LE01Gene01533,>LE01Gene02435,>LE01Gene00254,>LE01Gene01107,>LE01Gene10064,>LE01Gene12240,>LE01Gene12249,>LE01Gene12697,>LE01Gene05076,>LE01Gene09436,>LE01Gene09891,>LE01Gene08573,>LE01Gene13912,>LE01Gene…	4.61241e-06
Biological process	pyridine-containing compound biosynthetic process	GO:0072525	6	0.000328344	2.13215	20	47	1137	5697	>LE01Gene02390,>LE01Gene01422,>LE01Gene11222,>LE01Gene09790,>LE01Gene07114,>LE01Gene01873,>LE01Gene04902,>LE01Gene05356,>LE01Gene06236,>LE01Gene14216,>LE01Gene03960,>LE01Gene03056,>LE01Gene06597,>LE01Gene03019,>LE01Gene02540,>LE01Gene04720,>LE01Gene00733,>LE01Gene08279,>LE01Gene05567,>LE01Gene05579,	0.0115777		Cellular component	membrane protein complex	GO:0098796	3	2.78073e-07	2.13981	42	120	466	2849	>LE01Gene09041,>LE01Gene02435,>LE01Gene01107,>LE01Gene12240,>LE01Gene13972,>LE01Gene06313,>LE01Gene07697,>LE01Gene06352,>LE01Gene13008,>LE01Gene00183,>LE01Gene05850,>LE01Gene04586,>LE01Gene01076,>LE01Gene12551,>LE01Gene08075,>LE01Gene01885,>LE01Gene08056,>LE01Gene14307,>LE01Gene08458,>LE01Gene12084,>LE01Gene03585,>LE01Gene06610,>LE01Gene01780,>LE01Gene00457,>LE01Gene04859,>LE01Gene13329,>LE01Gene…	5.98674e-06
Biological process	nucleoside metabolic process	GO:0009116	7	0.000332145	2.73303	12	22	1137	5697	>LE01Gene13132,>LE01Gene12254,>LE01Gene13510,>LE01Gene02434,>LE01Gene06379,>LE01Gene01078,>LE01Gene00116,>LE01Gene10334,>LE01Gene14276,>LE01Gene12908,>LE01Gene02239,>LE01Gene07910,	0.0114625		Cellular component	proton-transporting ATP synthase complex	GO:0045259	5	6.08274e-07	5.09478	10	12	466	2849	>LE01Gene13008,>LE01Gene04586,>LE01Gene01885,>LE01Gene14307,>LE01Gene03585,>LE01Gene06610,>LE01Gene01780,>LE01Gene03934,>LE01Gene03007,>LE01Gene09140,	1.23682e-05
Biological process	oxoacid metabolic process	GO:0043436	5	0.000408285	1.30802	124	475	1137	5697	>LE01Gene06881,>LE01Gene01199,>LE01Gene07739,>LE01Gene03348,>LE01Gene04205,>LE01Gene01520,>LE01Gene01586,>LE01Gene00256,>LE01Gene10058,>LE01Gene10056,>LE01Gene04619,>LE01Gene02448,>LE01Gene09080,>LE01Gene02893,>LE01Gene00628,>LE01Gene02831,>LE01Gene10460,>LE01Gene11318,>LE01Gene01966,>LE01Gene01963,>LE01Gene06329,>LE01Gene08952,>LE01Gene07630,>LE01Gene07632,>LE01Gene01907,>LE01Gene04182,>LE01Gene…	0.0137966		Cellular component	protein-containing complex	GO:0032991	2	2.06988e-06	1.30065	187	879	466	2849	>LE01Gene03323,>LE01Gene06839,>LE01Gene06843,>LE01Gene05510,>LE01Gene14433,>LE01Gene14438,>LE01Gene03366,>LE01Gene05546,>LE01Gene02032,>LE01Gene04224,>LE01Gene01541,>LE01Gene01553,>LE01Gene09041,>LE01Gene08161,>LE01Gene01532,>LE01Gene02435,>LE01Gene10059,>LE01Gene01107,>LE01Gene10066,>LE01Gene12240,>LE01Gene01563,>LE01Gene00242,>LE01Gene01578,>LE01Gene13972,>LE01Gene01960,>LE01Gene00640,>LE01Gene…	3.98724e-05
Biological process	carboxylic acid metabolic process	GO:0019752	6	0.000408285	1.30802	124	475	1137	5697	>LE01Gene06881,>LE01Gene01199,>LE01Gene07739,>LE01Gene03348,>LE01Gene04205,>LE01Gene01520,>LE01Gene01586,>LE01Gene00256,>LE01Gene10058,>LE01Gene10056,>LE01Gene04619,>LE01Gene02448,>LE01Gene09080,>LE01Gene02893,>LE01Gene00628,>LE01Gene02831,>LE01Gene10460,>LE01Gene11318,>LE01Gene01966,>LE01Gene01963,>LE01Gene06329,>LE01Gene08952,>LE01Gene07630,>LE01Gene07632,>LE01Gene01907,>LE01Gene04182,>LE01Gene…	0.0137966		Cellular component	respirasome	GO:0070469	3	1.14525e-05	3.66824	12	20	466	2849	>LE01Gene02435,>LE01Gene12240,>LE01Gene05850,>LE01Gene01076,>LE01Gene08075,>LE01Gene02208,>LE01Gene06179,>LE01Gene13274,>LE01Gene08280,>LE01Gene02509,>LE01Gene11013,>LE01Gene04234,	0.000209582
Biological process	glucose metabolic process	GO:0006006	7	0.000408675	2.19976	18	41	1137	5697	>LE01Gene00638,>LE01Gene02390,>LE01Gene11222,>LE01Gene09790,>LE01Gene07114,>LE01Gene04902,>LE01Gene14216,>LE01Gene03960,>LE01Gene02678,>LE01Gene03056,>LE01Gene06597,>LE01Gene03019,>LE01Gene04720,>LE01Gene00733,>LE01Gene01623,>LE01Gene08279,>LE01Gene05567,>LE01Gene04299,	0.0132574		Cellular component	mitochondrial protein-containing complex	GO:0098798	3	1.16878e-05	3.29201	14	26	466	2849	>LE01Gene03323,>LE01Gene09041,>LE01Gene02435,>LE01Gene07697,>LE01Gene13008,>LE01Gene04586,>LE01Gene12551,>LE01Gene08056,>LE01Gene14307,>LE01Gene00461,>LE01Gene10655,>LE01Gene03934,>LE01Gene02509,>LE01Gene09140,	0.000203702
Biological process	purine ribonucleotide biosynthetic process	GO:0009152	11	0.000632011	1.90878	24	63	1137	5697	>LE01Gene06818,>LE01Gene02434,>LE01Gene01586,>LE01Gene10460,>LE01Gene02390,>LE01Gene11222,>LE01Gene09790,>LE01Gene00950,>LE01Gene07114,>LE01Gene07172,>LE01Gene04902,>LE01Gene14216,>LE01Gene07910,>LE01Gene03960,>LE01Gene00453,>LE01Gene03056,>LE01Gene06597,>LE01Gene03019,>LE01Gene06507,>LE01Gene04720,>LE01Gene04726,>LE01Gene00733,>LE01Gene08279,>LE01Gene05567,	0.0201004		Cellular component	MCM complex	GO:0042555	3	1.86386e-05	6.11373	6	6	466	2849	>LE01Gene03366,>LE01Gene10059,>LE01Gene08526,>LE01Gene08065,>LE01Gene11651,>LE01Gene02290,	0.000310079
Biological process	organic substance catabolic process	GO:1901575	4	0.000705291	1.38517	81	293	1137	5697	>LE01Gene06823,>LE01Gene05977,>LE01Gene07739,>LE01Gene06858,>LE01Gene12203,>LE01Gene04619,>LE01Gene12231,>LE01Gene09080,>LE01Gene10050,>LE01Gene09060,>LE01Gene11318,>LE01Gene08136,>LE01Gene07656,>LE01Gene04186,>LE01Gene08997,>LE01Gene07676,>LE01Gene08530,>LE01Gene04541,>LE01Gene02397,>LE01Gene04104,>LE01Gene03223,>LE01Gene02390,>LE01Gene11222,>LE01Gene01438,>LE01Gene01407,>LE01Gene01448,>LE01Gene…	0.0219996		Cellular component	respiratory chain complex	GO:0098803	4	2.12995e-05	3.73617	11	18	466	2849	>LE01Gene02435,>LE01Gene12240,>LE01Gene05850,>LE01Gene01076,>LE01Gene08075,>LE01Gene02208,>LE01Gene06179,>LE01Gene08280,>LE01Gene02509,>LE01Gene11013,>LE01Gene04234,	0.000338939
Biological process	aromatic amino acid family metabolic process	GO:0009072	8	0.000711164	1.79866	28	78	1137	5697	>LE01Gene06881,>LE01Gene01520,>LE01Gene09080,>LE01Gene02893,>LE01Gene04182,>LE01Gene07676,>LE01Gene10765,>LE01Gene07177,>LE01Gene11650,>LE01Gene08833,>LE01Gene03960,>LE01Gene02634,>LE01Gene07012,>LE01Gene12832,>LE01Gene06195,>LE01Gene05603,>LE01Gene01640,>LE01Gene03883,>LE01Gene02540,>LE01Gene03875,>LE01Gene04720,>LE01Gene04726,>LE01Gene01639,>LE01Gene06090,>LE01Gene06091,>LE01Gene08279,>LE01Gene…	0.0217643		Cellular component	non-membrane-bounded organelle	GO:0043228	4	2.83802e-05	1.38401	115	508	466	2849	>LE01Gene03323,>LE01Gene14433,>LE01Gene14438,>LE01Gene03366,>LE01Gene05546,>LE01Gene02038,>LE01Gene02019,>LE01Gene01532,>LE01Gene10059,>LE01Gene10066,>LE01Gene02417,>LE01Gene00242,>LE01Gene01578,>LE01Gene04609,>LE01Gene01960,>LE01Gene07645,>LE01Gene09867,>LE01Gene07689,>LE01Gene05494,>LE01Gene08526,>LE01Gene05499,>LE01Gene04172,>LE01Gene01018,>LE01Gene12144,>LE01Gene02350,>LE01Gene05437,>LE01Gene…	0.000432798
Biological process	obsolete coenzyme metabolic process	GO:0006732	0	0.000754796	1.59427	42	132	1137	5697	>LE01Gene13132,>LE01Gene00256,>LE01Gene06393,>LE01Gene08952,>LE01Gene01907,>LE01Gene02390,>LE01Gene01422,>LE01Gene11222,>LE01Gene09790,>LE01Gene09791,>LE01Gene11602,>LE01Gene07114,>LE01Gene10334,>LE01Gene01873,>LE01Gene04902,>LE01Gene02725,>LE01Gene05356,>LE01Gene14216,>LE01Gene03112,>LE01Gene03960,>LE01Gene09272,>LE01Gene11106,>LE01Gene02678,>LE01Gene10632,>LE01Gene12813,>LE01Gene03058,>LE01Gene…	0.0226718		Cellular component	intracellular non-membrane-bounded organelle	GO:0043232	5	2.83802e-05	1.38401	115	508	466	2849	>LE01Gene03323,>LE01Gene14433,>LE01Gene14438,>LE01Gene03366,>LE01Gene05546,>LE01Gene02038,>LE01Gene02019,>LE01Gene01532,>LE01Gene10059,>LE01Gene10066,>LE01Gene02417,>LE01Gene00242,>LE01Gene01578,>LE01Gene04609,>LE01Gene01960,>LE01Gene07645,>LE01Gene09867,>LE01Gene07689,>LE01Gene05494,>LE01Gene08526,>LE01Gene05499,>LE01Gene04172,>LE01Gene01018,>LE01Gene12144,>LE01Gene02350,>LE01Gene05437,>LE01Gene…	0.000432798
Biological process	nucleoside diphosphate phosphorylation	GO:0006165	9	0.000790419	2.27752	15	33	1137	5697	>LE01Gene02434,>LE01Gene02390,>LE01Gene11222,>LE01Gene09790,>LE01Gene07114,>LE01Gene04902,>LE01Gene14216,>LE01Gene03960,>LE01Gene03056,>LE01Gene06597,>LE01Gene03019,>LE01Gene04720,>LE01Gene00733,>LE01Gene08279,>LE01Gene05567,	0.0233102		Cellular component	cytochrome complex	GO:0070069	4	3.00701e-05	4.23259	9	13	466	2849	>LE01Gene02435,>LE01Gene12240,>LE01Gene05850,>LE01Gene01076,>LE01Gene08075,>LE01Gene06179,>LE01Gene08280,>LE01Gene02509,>LE01Gene04234,	0.000423295
Biological process	nucleoside phosphate biosynthetic process	GO:1901293	8	0.000847654	1.72586	31	90	1137	5697	>LE01Gene06818,>LE01Gene13510,>LE01Gene02434,>LE01Gene01586,>LE01Gene10460,>LE01Gene01078,>LE01Gene02390,>LE01Gene01422,>LE01Gene11222,>LE01Gene09790,>LE01Gene00950,>LE01Gene07114,>LE01Gene07172,>LE01Gene04902,>LE01Gene09327,>LE01Gene05356,>LE01Gene05330,>LE01Gene14216,>LE01Gene07910,>LE01Gene03960,>LE01Gene00453,>LE01Gene03056,>LE01Gene06597,>LE01Gene03019,>LE01Gene06507,>LE01Gene02540,>LE01Gene…	0.0245517		Cellular component	inner mitochondrial membrane protein complex	GO:0098800	4	8.17359e-05	3.59631	10	17	466	2849	>LE01Gene09041,>LE01Gene02435,>LE01Gene13008,>LE01Gene04586,>LE01Gene12551,>LE01Gene08056,>LE01Gene14307,>LE01Gene03934,>LE01Gene02509,>LE01Gene09140,	0.00110798
Biological process	nucleotide biosynthetic process	GO:0009165	9	0.000847654	1.72586	31	90	1137	5697	>LE01Gene06818,>LE01Gene13510,>LE01Gene02434,>LE01Gene01586,>LE01Gene10460,>LE01Gene01078,>LE01Gene02390,>LE01Gene01422,>LE01Gene11222,>LE01Gene09790,>LE01Gene00950,>LE01Gene07114,>LE01Gene07172,>LE01Gene04902,>LE01Gene09327,>LE01Gene05356,>LE01Gene05330,>LE01Gene14216,>LE01Gene07910,>LE01Gene03960,>LE01Gene00453,>LE01Gene03056,>LE01Gene06597,>LE01Gene03019,>LE01Gene06507,>LE01Gene02540,>LE01Gene…	0.0245517		Cellular component	obsolete mitochondrial membrane part	GO:0044455	0	0.000130417	3.05687	12	24	466	2849	>LE01Gene09041,>LE01Gene02435,>LE01Gene11700,>LE01Gene07697,>LE01Gene13008,>LE01Gene04586,>LE01Gene12551,>LE01Gene08056,>LE01Gene14307,>LE01Gene03934,>LE01Gene02509,>LE01Gene09140,	0.00170474
Biological process	amine metabolic process	GO:0009308	5	0.000856186	1.9339	22	57	1137	5697	>LE01Gene06881,>LE01Gene07739,>LE01Gene06854,>LE01Gene01520,>LE01Gene09080,>LE01Gene02893,>LE01Gene04182,>LE01Gene10765,>LE01Gene07177,>LE01Gene08833,>LE01Gene03960,>LE01Gene07012,>LE01Gene12832,>LE01Gene06195,>LE01Gene06514,>LE01Gene04738,>LE01Gene02540,>LE01Gene04720,>LE01Gene06090,>LE01Gene06091,>LE01Gene08279,>LE01Gene04245,	0.0239437		Cellular component	proton-transporting two-sector ATPase complex	GO:0016469	4	0.000214132	2.93459	12	25	466	2849	>LE01Gene06352,>LE01Gene13008,>LE01Gene04586,>LE01Gene01885,>LE01Gene14307,>LE01Gene03585,>LE01Gene06610,>LE01Gene01780,>LE01Gene10225,>LE01Gene03934,>LE01Gene03007,>LE01Gene09140,	0.0027025
Biological process	ribonucleotide biosynthetic process	GO:0009260	10	0.000906474	1.84212	25	68	1137	5697	>LE01Gene06818,>LE01Gene02434,>LE01Gene01586,>LE01Gene10460,>LE01Gene01078,>LE01Gene02390,>LE01Gene11222,>LE01Gene09790,>LE01Gene00950,>LE01Gene07114,>LE01Gene07172,>LE01Gene04902,>LE01Gene14216,>LE01Gene07910,>LE01Gene03960,>LE01Gene00453,>LE01Gene03056,>LE01Gene06597,>LE01Gene03019,>LE01Gene06507,>LE01Gene04720,>LE01Gene04726,>LE01Gene00733,>LE01Gene08279,>LE01Gene05567,	0.0249203		Cellular component	mitochondrial matrix	GO:0005759	6	0.000302042	3.43898	9	16	466	2849	>LE01Gene03323,>LE01Gene07645,>LE01Gene02392,>LE01Gene04875,>LE01Gene13399,>LE01Gene00461,>LE01Gene00801,>LE01Gene03424,>LE01Gene00365,	0.00368491
Biological process	ribose phosphate biosynthetic process	GO:0046390	7	0.000906474	1.84212	25	68	1137	5697	>LE01Gene06818,>LE01Gene02434,>LE01Gene01586,>LE01Gene10460,>LE01Gene01078,>LE01Gene02390,>LE01Gene11222,>LE01Gene09790,>LE01Gene00950,>LE01Gene07114,>LE01Gene07172,>LE01Gene04902,>LE01Gene14216,>LE01Gene07910,>LE01Gene03960,>LE01Gene00453,>LE01Gene03056,>LE01Gene06597,>LE01Gene03019,>LE01Gene06507,>LE01Gene04720,>LE01Gene04726,>LE01Gene00733,>LE01Gene08279,>LE01Gene05567,	0.0249203		Cellular component	chromosome	GO:0005694	6	0.00036806	1.61834	45	170	466	2849	>LE01Gene14433,>LE01Gene03366,>LE01Gene02038,>LE01Gene01532,>LE01Gene10059,>LE01Gene10066,>LE01Gene02417,>LE01Gene04609,>LE01Gene07645,>LE01Gene08526,>LE01Gene04172,>LE01Gene12144,>LE01Gene02350,>LE01Gene05416,>LE01Gene08065,>LE01Gene08055,>LE01Gene01474,>LE01Gene09319,>LE01Gene00959,>LE01Gene06270,>LE01Gene01845,>LE01Gene11651,>LE01Gene12981,>LE01Gene09747,>LE01Gene05387,>LE01Gene07551,>LE01Gene…	0.00434548
Biological process	nucleobase-containing small molecule metabolic process	GO:0055086	6	0.000918321	1.41966	68	240	1137	5697	>LE01Gene13132,>LE01Gene06818,>LE01Gene12254,>LE01Gene13510,>LE01Gene02434,>LE01Gene01586,>LE01Gene00256,>LE01Gene06379,>LE01Gene06393,>LE01Gene02836,>LE01Gene01999,>LE01Gene10460,>LE01Gene11712,>LE01Gene01078,>LE01Gene05436,>LE01Gene04567,>LE01Gene08929,>LE01Gene02390,>LE01Gene01422,>LE01Gene11222,>LE01Gene11277,>LE01Gene00116,>LE01Gene09790,>LE01Gene09791,>LE01Gene00950,>LE01Gene07114,>LE01Gene…	0.0244183		Cellular component	tubulin complex	GO:0045298	3	0.000549887	3.23668	9	17	466	2849	>LE01Gene05546,>LE01Gene05437,>LE01Gene12981,>LE01Gene03108,>LE01Gene00089,>LE01Gene03433,>LE01Gene09135,>LE01Gene00755,>LE01Gene00757,	0.00628933
Biological process	aromatic compound catabolic process	GO:0019439	5	0.00100068	1.72778	30	87	1137	5697	>LE01Gene05977,>LE01Gene09080,>LE01Gene09060,>LE01Gene08997,>LE01Gene02390,>LE01Gene11222,>LE01Gene00116,>LE01Gene09790,>LE01Gene07114,>LE01Gene04902,>LE01Gene10314,>LE01Gene14216,>LE01Gene03960,>LE01Gene02634,>LE01Gene11106,>LE01Gene10241,>LE01Gene03056,>LE01Gene06597,>LE01Gene02129,>LE01Gene03019,>LE01Gene02142,>LE01Gene03883,>LE01Gene02540,>LE01Gene03875,>LE01Gene04720,>LE01Gene00733,>LE01Gene…	0.0261791		Cellular component	endomembrane system	GO:0012505	3	0.000559372	1.6558	39	144	466	2849	>LE01Gene01152,>LE01Gene02484,>LE01Gene04206,>LE01Gene13528,>LE01Gene01107,>LE01Gene13972,>LE01Gene07270,>LE01Gene12618,>LE01Gene11772,>LE01Gene06313,>LE01Gene06357,>LE01Gene00183,>LE01Gene14383,>LE01Gene07617,>LE01Gene13887,>LE01Gene01892,>LE01Gene14308,>LE01Gene08458,>LE01Gene10330,>LE01Gene09341,>LE01Gene12084,>LE01Gene00093,>LE01Gene00457,>LE01Gene04859,>LE01Gene13329,>LE01Gene09670,>LE01Gene…	0.00620394
Biological process	purine nucleoside monophosphate biosynthetic process	GO:0009127	10	0.00112431	1.90055	22	58	1137	5697	>LE01Gene06818,>LE01Gene01586,>LE01Gene02390,>LE01Gene11222,>LE01Gene09790,>LE01Gene00950,>LE01Gene07114,>LE01Gene07172,>LE01Gene04902,>LE01Gene14216,>LE01Gene07910,>LE01Gene03960,>LE01Gene00453,>LE01Gene03056,>LE01Gene06597,>LE01Gene03019,>LE01Gene06507,>LE01Gene04720,>LE01Gene04726,>LE01Gene00733,>LE01Gene08279,>LE01Gene05567,	0.0289465		Cellular component	mitochondrial proton-transporting ATP synthase complex	GO:0005753	6	0.000596719	5.09478	5	6	466	2849	>LE01Gene13008,>LE01Gene04586,>LE01Gene14307,>LE01Gene03934,>LE01Gene09140,	0.00642351
Biological process	purine ribonucleoside monophosphate biosynthetic process	GO:0009168	11	0.00112431	1.90055	22	58	1137	5697	>LE01Gene06818,>LE01Gene01586,>LE01Gene02390,>LE01Gene11222,>LE01Gene09790,>LE01Gene00950,>LE01Gene07114,>LE01Gene07172,>LE01Gene04902,>LE01Gene14216,>LE01Gene07910,>LE01Gene03960,>LE01Gene00453,>LE01Gene03056,>LE01Gene06597,>LE01Gene03019,>LE01Gene06507,>LE01Gene04720,>LE01Gene04726,>LE01Gene00733,>LE01Gene08279,>LE01Gene05567,	0.0289465		Cellular component	proton-transporting ATP synthase complex, catalytic core F(1)	GO:0045261	5	0.000596719	5.09478	5	6	466	2849	>LE01Gene13008,>LE01Gene01885,>LE01Gene03585,>LE01Gene06610,>LE01Gene03007,	0.00642351
Biological process	catabolic process	GO:0009056	3	0.00126737	1.35464	83	307	1137	5697	>LE01Gene06823,>LE01Gene05977,>LE01Gene07739,>LE01Gene06858,>LE01Gene12203,>LE01Gene04619,>LE01Gene12231,>LE01Gene09080,>LE01Gene10050,>LE01Gene09060,>LE01Gene11318,>LE01Gene08136,>LE01Gene07656,>LE01Gene04186,>LE01Gene08997,>LE01Gene07676,>LE01Gene08530,>LE01Gene04541,>LE01Gene02397,>LE01Gene04104,>LE01Gene03223,>LE01Gene02390,>LE01Gene11222,>LE01Gene01438,>LE01Gene01407,>LE01Gene01448,>LE01Gene…	0.0316257		Cellular component	polymeric cytoskeletal fiber	GO:0099513	6	0.000874003	2.4837	13	32	466	2849	>LE01Gene05546,>LE01Gene05437,>LE01Gene01434,>LE01Gene01435,>LE01Gene11633,>LE01Gene12981,>LE01Gene03108,>LE01Gene00089,>LE01Gene11519,>LE01Gene09130,>LE01Gene00755,>LE01Gene00757,>LE01Gene08622,	0.00820218
Biological process	pyruvate biosynthetic process	GO:0042866	9	0.00127411	2.26283	14	31	1137	5697	>LE01Gene02390,>LE01Gene11222,>LE01Gene09790,>LE01Gene07114,>LE01Gene04902,>LE01Gene14216,>LE01Gene03960,>LE01Gene03056,>LE01Gene06597,>LE01Gene03019,>LE01Gene04720,>LE01Gene00733,>LE01Gene08279,>LE01Gene05567,	0.0313122		Cellular component	supramolecular fiber	GO:0099512	5	0.000874003	2.4837	13	32	466	2849	>LE01Gene05546,>LE01Gene05437,>LE01Gene01434,>LE01Gene01435,>LE01Gene11633,>LE01Gene12981,>LE01Gene03108,>LE01Gene00089,>LE01Gene11519,>LE01Gene09130,>LE01Gene00755,>LE01Gene00757,>LE01Gene08622,	0.00820218
Biological process	glycolytic process	GO:0006096	13	0.00127411	2.26283	14	31	1137	5697	>LE01Gene02390,>LE01Gene11222,>LE01Gene09790,>LE01Gene07114,>LE01Gene04902,>LE01Gene14216,>LE01Gene03960,>LE01Gene03056,>LE01Gene06597,>LE01Gene03019,>LE01Gene04720,>LE01Gene00733,>LE01Gene08279,>LE01Gene05567,	0.0313122		Cellular component	microtubule	GO:0005874	7	0.000874003	2.4837	13	32	466	2849	>LE01Gene05546,>LE01Gene05437,>LE01Gene01434,>LE01Gene01435,>LE01Gene11633,>LE01Gene12981,>LE01Gene03108,>LE01Gene00089,>LE01Gene11519,>LE01Gene09130,>LE01Gene00755,>LE01Gene00757,>LE01Gene08622,	0.00820218
Biological process	ATP generation from ADP	GO:0006757	12	0.00127411	2.26283	14	31	1137	5697	>LE01Gene02390,>LE01Gene11222,>LE01Gene09790,>LE01Gene07114,>LE01Gene04902,>LE01Gene14216,>LE01Gene03960,>LE01Gene03056,>LE01Gene06597,>LE01Gene03019,>LE01Gene04720,>LE01Gene00733,>LE01Gene08279,>LE01Gene05567,	0.0313122		Cellular component	supramolecular polymer	GO:0099081	4	0.000874003	2.4837	13	32	466	2849	>LE01Gene05546,>LE01Gene05437,>LE01Gene01434,>LE01Gene01435,>LE01Gene11633,>LE01Gene12981,>LE01Gene03108,>LE01Gene00089,>LE01Gene11519,>LE01Gene09130,>LE01Gene00755,>LE01Gene00757,>LE01Gene08622,	0.00820218
Biological process	nicotinamide nucleotide biosynthetic process	GO:0019359	11	0.00129251	2.07755	17	41	1137	5697	>LE01Gene02390,>LE01Gene01422,>LE01Gene11222,>LE01Gene09790,>LE01Gene07114,>LE01Gene04902,>LE01Gene05356,>LE01Gene14216,>LE01Gene03960,>LE01Gene03056,>LE01Gene06597,>LE01Gene03019,>LE01Gene02540,>LE01Gene04720,>LE01Gene00733,>LE01Gene08279,>LE01Gene05567,	0.0303833		Cellular component	endoplasmic reticulum subcompartment	GO:0098827	4	0.00096945	2.22318	16	44	466	2849	>LE01Gene04206,>LE01Gene13528,>LE01Gene01107,>LE01Gene11772,>LE01Gene06313,>LE01Gene07617,>LE01Gene13887,>LE01Gene10330,>LE01Gene09341,>LE01Gene00093,>LE01Gene00457,>LE01Gene04859,>LE01Gene08385,>LE01Gene04328,>LE01Gene01648,>LE01Gene10516,	0.0082516
Biological process	pyridine nucleotide biosynthetic process	GO:0019363	10	0.00129251	2.07755	17	41	1137	5697	>LE01Gene02390,>LE01Gene01422,>LE01Gene11222,>LE01Gene09790,>LE01Gene07114,>LE01Gene04902,>LE01Gene05356,>LE01Gene14216,>LE01Gene03960,>LE01Gene03056,>LE01Gene06597,>LE01Gene03019,>LE01Gene02540,>LE01Gene04720,>LE01Gene00733,>LE01Gene08279,>LE01Gene05567,	0.0303833		Cellular component	endoplasmic reticulum membrane	GO:0005789	5	0.00096945	2.22318	16	44	466	2849	>LE01Gene04206,>LE01Gene13528,>LE01Gene01107,>LE01Gene11772,>LE01Gene06313,>LE01Gene07617,>LE01Gene13887,>LE01Gene10330,>LE01Gene09341,>LE01Gene00093,>LE01Gene00457,>LE01Gene04859,>LE01Gene08385,>LE01Gene04328,>LE01Gene01648,>LE01Gene10516,	0.0082516
Biological process	response to chemical	GO:0042221	3	0.0013917	1.33515	89	334	1137	5697	>LE01Gene13132,>LE01Gene00290,>LE01Gene06881,>LE01Gene03342,>LE01Gene10024,>LE01Gene01520,>LE01Gene13508,>LE01Gene01586,>LE01Gene02448,>LE01Gene02893,>LE01Gene02418,>LE01Gene09060,>LE01Gene00628,>LE01Gene01966,>LE01Gene09830,>LE01Gene07656,>LE01Gene05481,>LE01Gene07630,>LE01Gene07632,>LE01Gene08962,>LE01Gene04182,>LE01Gene11712,>LE01Gene10868,>LE01Gene08997,>LE01Gene00185,>LE01Gene07614,>LE01Gene…	0.0317934		Cellular component	nuclear outer membrane-endoplasmic reticulum membrane network	GO:0042175	4	0.00096945	2.22318	16	44	466	2849	>LE01Gene04206,>LE01Gene13528,>LE01Gene01107,>LE01Gene11772,>LE01Gene06313,>LE01Gene07617,>LE01Gene13887,>LE01Gene10330,>LE01Gene09341,>LE01Gene00093,>LE01Gene00457,>LE01Gene04859,>LE01Gene08385,>LE01Gene04328,>LE01Gene01648,>LE01Gene10516,	0.0082516
Biological process	cellular polysaccharide catabolic process	GO:0044247	7	0.00142894	2.81844	9	16	1137	5697	>LE01Gene06823,>LE01Gene10050,>LE01Gene01448,>LE01Gene11660,>LE01Gene04829,>LE01Gene09248,>LE01Gene12864,>LE01Gene01683,>LE01Gene04299,	0.0321909		Cellular component	tricarboxylic acid cycle enzyme complex	GO:0045239	4	0.0010019	4.07582	6	9	466	2849	>LE01Gene09374,>LE01Gene10685,>LE01Gene03065,>LE01Gene06114,>LE01Gene03843,>LE01Gene03404,	0.00797165
Biological process	indole-containing compound metabolic process	GO:0042430	5	0.00154131	2.00422	18	45	1137	5697	>LE01Gene06881,>LE01Gene01520,>LE01Gene09080,>LE01Gene02893,>LE01Gene04182,>LE01Gene10765,>LE01Gene07177,>LE01Gene08833,>LE01Gene03960,>LE01Gene07012,>LE01Gene12832,>LE01Gene06195,>LE01Gene02540,>LE01Gene04720,>LE01Gene06090,>LE01Gene06091,>LE01Gene08279,>LE01Gene04245,	0.0342467		Cellular component	kinesin complex	GO:0005871	4	0.0011194	3.56634	7	12	466	2849	>LE01Gene05546,>LE01Gene05437,>LE01Gene12981,>LE01Gene03108,>LE01Gene00089,>LE01Gene00755,>LE01Gene00757,	0.00871704
Biological process	tryptophan metabolic process	GO:0006568	9	0.00154131	2.00422	18	45	1137	5697	>LE01Gene06881,>LE01Gene01520,>LE01Gene09080,>LE01Gene02893,>LE01Gene04182,>LE01Gene10765,>LE01Gene07177,>LE01Gene08833,>LE01Gene03960,>LE01Gene07012,>LE01Gene12832,>LE01Gene06195,>LE01Gene02540,>LE01Gene04720,>LE01Gene06090,>LE01Gene06091,>LE01Gene08279,>LE01Gene04245,	0.0342467		Cellular component	intrinsic component of membrane	GO:0031224	3	0.00157647	1.23566	134	663	466	2849	>LE01Gene00297,>LE01Gene01152,>LE01Gene01153,>LE01Gene00276,>LE01Gene05547,>LE01Gene06407,>LE01Gene12299,>LE01Gene04206,>LE01Gene14484,>LE01Gene13528,>LE01Gene12689,>LE01Gene14838,>LE01Gene01533,>LE01Gene02435,>LE01Gene00254,>LE01Gene10064,>LE01Gene12249,>LE01Gene12697,>LE01Gene05076,>LE01Gene09436,>LE01Gene09891,>LE01Gene08573,>LE01Gene13912,>LE01Gene10405,>LE01Gene08571,>LE01Gene08155,>LE01Gene…	0.0120206
Biological process	indolalkylamine metabolic process	GO:0006586	8	0.00154131	2.00422	18	45	1137	5697	>LE01Gene06881,>LE01Gene01520,>LE01Gene09080,>LE01Gene02893,>LE01Gene04182,>LE01Gene10765,>LE01Gene07177,>LE01Gene08833,>LE01Gene03960,>LE01Gene07012,>LE01Gene12832,>LE01Gene06195,>LE01Gene02540,>LE01Gene04720,>LE01Gene06090,>LE01Gene06091,>LE01Gene08279,>LE01Gene04245,	0.0342467		Cellular component	obsolete chromosomal part	GO:0044427	0	0.00199636	1.54778	40	158	466	2849	>LE01Gene14433,>LE01Gene03366,>LE01Gene01532,>LE01Gene10059,>LE01Gene10066,>LE01Gene02417,>LE01Gene04609,>LE01Gene08526,>LE01Gene04172,>LE01Gene12144,>LE01Gene02350,>LE01Gene05416,>LE01Gene08065,>LE01Gene08055,>LE01Gene01474,>LE01Gene09319,>LE01Gene00959,>LE01Gene06270,>LE01Gene11651,>LE01Gene12981,>LE01Gene09747,>LE01Gene05387,>LE01Gene07551,>LE01Gene00925,>LE01Gene03551,>LE01Gene02290,>LE01Gene…	0.0149116
Biological process	amino sugar metabolic process	GO:0006040	5	0.00177451	2.02808	17	42	1137	5697	>LE01Gene07656,>LE01Gene04192,>LE01Gene00185,>LE01Gene06745,>LE01Gene10788,>LE01Gene07124,>LE01Gene11646,>LE01Gene00046,>LE01Gene00047,>LE01Gene02645,>LE01Gene10240,>LE01Gene00015,>LE01Gene03019,>LE01Gene10125,>LE01Gene10124,>LE01Gene08676,>LE01Gene05597,	0.0378717		Cellular component	integral component of membrane	GO:0016021	4	0.00213741	1.22829	133	662	466	2849	>LE01Gene00297,>LE01Gene01152,>LE01Gene01153,>LE01Gene00276,>LE01Gene05547,>LE01Gene06407,>LE01Gene12299,>LE01Gene04206,>LE01Gene14484,>LE01Gene13528,>LE01Gene12689,>LE01Gene14838,>LE01Gene01533,>LE01Gene02435,>LE01Gene00254,>LE01Gene10064,>LE01Gene12249,>LE01Gene12697,>LE01Gene05076,>LE01Gene09436,>LE01Gene09891,>LE01Gene13912,>LE01Gene10405,>LE01Gene08571,>LE01Gene08155,>LE01Gene07276,>LE01Gene…	0.0156458
Biological process	nucleotide metabolic process	GO:0009117	8	0.00180034	1.47369	50	170	1137	5697	>LE01Gene13132,>LE01Gene06818,>LE01Gene13510,>LE01Gene02434,>LE01Gene01586,>LE01Gene00256,>LE01Gene06393,>LE01Gene10460,>LE01Gene11712,>LE01Gene01078,>LE01Gene02390,>LE01Gene01422,>LE01Gene11222,>LE01Gene09790,>LE01Gene09791,>LE01Gene00950,>LE01Gene07114,>LE01Gene10334,>LE01Gene07172,>LE01Gene04902,>LE01Gene02725,>LE01Gene09327,>LE01Gene12503,>LE01Gene05356,>LE01Gene05330,>LE01Gene14216,>LE01Gene…	0.0379241		Cellular component	DNA packaging complex	GO:0044815	3	0.00392675	2.08762	14	41	466	2849	>LE01Gene01532,>LE01Gene12144,>LE01Gene08055,>LE01Gene05387,>LE01Gene03551,>LE01Gene13783,>LE01Gene13301,>LE01Gene13300,>LE01Gene13784,>LE01Gene03840,>LE01Gene03839,>LE01Gene05172,>LE01Gene00778,>LE01Gene05105,	0.0266147
Biological process	ribonucleoside monophosphate biosynthetic process	GO:0009156	10	0.00203644	1.80067	23	64	1137	5697	>LE01Gene06818,>LE01Gene01586,>LE01Gene01078,>LE01Gene02390,>LE01Gene11222,>LE01Gene09790,>LE01Gene00950,>LE01Gene07114,>LE01Gene07172,>LE01Gene04902,>LE01Gene14216,>LE01Gene07910,>LE01Gene03960,>LE01Gene00453,>LE01Gene03056,>LE01Gene06597,>LE01Gene03019,>LE01Gene06507,>LE01Gene04720,>LE01Gene04726,>LE01Gene00733,>LE01Gene08279,>LE01Gene05567,	0.0423475		Cellular component	microtubule associated complex	GO:0005875	3	0.00395936	2.44549	10	25	466	2849	>LE01Gene05546,>LE01Gene05437,>LE01Gene11633,>LE01Gene12981,>LE01Gene03108,>LE01Gene00089,>LE01Gene10693,>LE01Gene09610,>LE01Gene00755,>LE01Gene00757,	0.0263477
Biological process	obsolete peroxidase reaction	GO:0006804	0	0.00205536	2.24611	13	29	1137	5697	>LE01Gene01167,>LE01Gene09060,>LE01Gene10877,>LE01Gene10879,>LE01Gene08997,>LE01Gene08061,>LE01Gene04499,>LE01Gene03530,>LE01Gene10614,>LE01Gene12747,>LE01Gene04245,>LE01Gene06488,>LE01Gene10965,	0.0422		Cellular component	proton-transporting two-sector ATPase complex, proton-transporting domain	GO:0033177	4	0.0041027	3.33476	6	11	466	2849	>LE01Gene06352,>LE01Gene04586,>LE01Gene14307,>LE01Gene10225,>LE01Gene03934,>LE01Gene09140,	0.026814
Biological process	cellular biogenic amine metabolic process	GO:0006576	7	0.00234401	1.90401	19	50	1137	5697	>LE01Gene06881,>LE01Gene01520,>LE01Gene09080,>LE01Gene02893,>LE01Gene04182,>LE01Gene10765,>LE01Gene07177,>LE01Gene08833,>LE01Gene03960,>LE01Gene07012,>LE01Gene12832,>LE01Gene06195,>LE01Gene06514,>LE01Gene02540,>LE01Gene04720,>LE01Gene06090,>LE01Gene06091,>LE01Gene08279,>LE01Gene04245,	0.0475248		Cellular component	protein-DNA complex	GO:0032993	3	0.00551408	2.35144	10	26	466	2849	>LE01Gene01532,>LE01Gene12144,>LE01Gene08055,>LE01Gene13783,>LE01Gene13301,>LE01Gene13300,>LE01Gene13784,>LE01Gene03840,>LE01Gene03839,>LE01Gene00778,	0.0354062
Biological process	cell wall macromolecule catabolic process	GO:0016998	7	0.00250313	2.65265	9	17	1137	5697	>LE01Gene06823,>LE01Gene07656,>LE01Gene03223,>LE01Gene01448,>LE01Gene11646,>LE01Gene02639,>LE01Gene10125,>LE01Gene10124,>LE01Gene01683,	0.0501244		Cellular component	nucleosome	GO:0000786	4	0.00551408	2.35144	10	26	466	2849	>LE01Gene01532,>LE01Gene12144,>LE01Gene08055,>LE01Gene13783,>LE01Gene13301,>LE01Gene13300,>LE01Gene13784,>LE01Gene03840,>LE01Gene03839,>LE01Gene00778,	0.0354062
Biological process	polyol metabolic process	GO:0019751	6	0.00250313	2.65265	9	17	1137	5697	>LE01Gene08530,>LE01Gene11222,>LE01Gene09790,>LE01Gene04902,>LE01Gene06597,>LE01Gene03019,>LE01Gene11898,>LE01Gene04299,>LE01Gene05151,	0.0501244		Cellular component	microtubule cytoskeleton	GO:0015630	7	0.0067507	1.88115	16	52	466	2849	>LE01Gene05546,>LE01Gene05437,>LE01Gene01434,>LE01Gene01435,>LE01Gene11633,>LE01Gene12981,>LE01Gene03108,>LE01Gene00089,>LE01Gene11519,>LE01Gene10693,>LE01Gene09610,>LE01Gene09130,>LE01Gene00325,>LE01Gene00755,>LE01Gene00757,>LE01Gene08622,	0.0418772
Biological process	fructose metabolic process	GO:0006000	7	0.00250674	2.50528	10	20	1137	5697	>LE01Gene11222,>LE01Gene04902,>LE01Gene04060,>LE01Gene13706,>LE01Gene06597,>LE01Gene03017,>LE01Gene03019,>LE01Gene00332,>LE01Gene00733,>LE01Gene11898,	0.0489871		Cellular component	obsolete cytoskeletal part	GO:0044430	0	0.00699491	1.71185	21	75	466	2849	>LE01Gene05546,>LE01Gene01018,>LE01Gene05437,>LE01Gene01434,>LE01Gene01435,>LE01Gene11633,>LE01Gene12981,>LE01Gene03108,>LE01Gene00089,>LE01Gene11519,>LE01Gene10693,>LE01Gene03067,>LE01Gene09610,>LE01Gene03433,>LE01Gene09135,>LE01Gene09130,>LE01Gene00325,>LE01Gene00755,>LE01Gene00757,>LE01Gene08622,>LE01Gene07300,	0.0426689
Biological process	mannose metabolic process	GO:0006013	7	0.00250674	2.50528	10	20	1137	5697	>LE01Gene11222,>LE01Gene04902,>LE01Gene04060,>LE01Gene13706,>LE01Gene06597,>LE01Gene03017,>LE01Gene03019,>LE01Gene00332,>LE01Gene00733,>LE01Gene11898,	0.0489871		Cellular component	vesicle membrane	GO:0012506	5	0.00708599	3.05687	6	12	466	2849	>LE01Gene01152,>LE01Gene13972,>LE01Gene00183,>LE01Gene13329,>LE01Gene08390,>LE01Gene05102,	0.0425159
Biological process	nucleoside monophosphate biosynthetic process	GO:0009124	9	0.0025693	1.77297	23	65	1137	5697	>LE01Gene06818,>LE01Gene01586,>LE01Gene01078,>LE01Gene02390,>LE01Gene11222,>LE01Gene09790,>LE01Gene00950,>LE01Gene07114,>LE01Gene07172,>LE01Gene04902,>LE01Gene14216,>LE01Gene07910,>LE01Gene03960,>LE01Gene00453,>LE01Gene03056,>LE01Gene06597,>LE01Gene03019,>LE01Gene06507,>LE01Gene04720,>LE01Gene04726,>LE01Gene00733,>LE01Gene08279,>LE01Gene05567,	0.0490283		Cellular component	obsolete cytoplasmic vesicle part	GO:0044433	0	0.00708599	3.05687	6	12	466	2849	>LE01Gene01152,>LE01Gene13972,>LE01Gene00183,>LE01Gene13329,>LE01Gene08390,>LE01Gene05102,	0.0425159
Biological process	purine nucleoside diphosphate metabolic process	GO:0009135	9	0.00263951	2.12569	14	33	1137	5697	>LE01Gene02390,>LE01Gene11222,>LE01Gene09790,>LE01Gene07114,>LE01Gene04902,>LE01Gene14216,>LE01Gene03960,>LE01Gene03056,>LE01Gene06597,>LE01Gene03019,>LE01Gene04720,>LE01Gene00733,>LE01Gene08279,>LE01Gene05567,	0.0497824		Cellular component	cytoplasmic vesicle membrane	GO:0030659	6	0.00708599	3.05687	6	12	466	2849	>LE01Gene01152,>LE01Gene13972,>LE01Gene00183,>LE01Gene13329,>LE01Gene08390,>LE01Gene05102,	0.0425159
Biological process	ADP metabolic process	GO:0046031	11	0.00263951	2.12569	14	33	1137	5697	>LE01Gene02390,>LE01Gene11222,>LE01Gene09790,>LE01Gene07114,>LE01Gene04902,>LE01Gene14216,>LE01Gene03960,>LE01Gene03056,>LE01Gene06597,>LE01Gene03019,>LE01Gene04720,>LE01Gene00733,>LE01Gene08279,>LE01Gene05567,	0.0497824		Cellular component	Golgi-associated vesicle	GO:0005798	8	0.00814051	3.39652	5	9	466	2849	>LE01Gene13972,>LE01Gene00183,>LE01Gene13329,>LE01Gene08390,>LE01Gene05102,	0.0465536
Biological process	purine ribonucleoside diphosphate metabolic process	GO:0009179	10	0.00263951	2.12569	14	33	1137	5697	>LE01Gene02390,>LE01Gene11222,>LE01Gene09790,>LE01Gene07114,>LE01Gene04902,>LE01Gene14216,>LE01Gene03960,>LE01Gene03056,>LE01Gene06597,>LE01Gene03019,>LE01Gene04720,>LE01Gene00733,>LE01Gene08279,>LE01Gene05567,	0.0497824		Cellular component	respiratory chain complex IV	GO:0045277	5	0.00814051	3.39652	5	9	466	2849	>LE01Gene12240,>LE01Gene01076,>LE01Gene06179,>LE01Gene08280,>LE01Gene04234,	0.0465536
Biological process	ribonucleoside diphosphate metabolic process	GO:0009185	9	0.00263951	2.12569	14	33	1137	5697	>LE01Gene02390,>LE01Gene11222,>LE01Gene09790,>LE01Gene07114,>LE01Gene04902,>LE01Gene14216,>LE01Gene03960,>LE01Gene03056,>LE01Gene06597,>LE01Gene03019,>LE01Gene04720,>LE01Gene00733,>LE01Gene08279,>LE01Gene05567,	0.0497824		Cellular component	Golgi-associated vesicle membrane	GO:0030660	7	0.00814051	3.39652	5	9	466	2849	>LE01Gene13972,>LE01Gene00183,>LE01Gene13329,>LE01Gene08390,>LE01Gene05102,	0.0465536
Biological process	alcohol metabolic process	GO:0006066	5	0.00263951	2.12569	14	33	1137	5697	>LE01Gene03342,>LE01Gene05481,>LE01Gene10868,>LE01Gene08530,>LE01Gene11222,>LE01Gene09790,>LE01Gene04902,>LE01Gene03960,>LE01Gene06597,>LE01Gene03019,>LE01Gene02135,>LE01Gene11898,>LE01Gene04299,>LE01Gene05151,	0.0497824		Cellular component	endoplasmic reticulum	GO:0005783	6	0.00823391	1.68932	21	76	466	2849	>LE01Gene04206,>LE01Gene13528,>LE01Gene01107,>LE01Gene07270,>LE01Gene12618,>LE01Gene11772,>LE01Gene06313,>LE01Gene06357,>LE01Gene07617,>LE01Gene13887,>LE01Gene10330,>LE01Gene09341,>LE01Gene00093,>LE01Gene00457,>LE01Gene04859,>LE01Gene09670,>LE01Gene08385,>LE01Gene04328,>LE01Gene01648,>LE01Gene01688,>LE01Gene10516,	0.0449793
Biological process	nucleoside phosphate metabolic process	GO:0006753	7	0.00269743	1.44814	50	173	1137	5697	>LE01Gene13132,>LE01Gene06818,>LE01Gene13510,>LE01Gene02434,>LE01Gene01586,>LE01Gene00256,>LE01Gene06393,>LE01Gene10460,>LE01Gene11712,>LE01Gene01078,>LE01Gene02390,>LE01Gene01422,>LE01Gene11222,>LE01Gene09790,>LE01Gene09791,>LE01Gene00950,>LE01Gene07114,>LE01Gene10334,>LE01Gene07172,>LE01Gene04902,>LE01Gene02725,>LE01Gene09327,>LE01Gene12503,>LE01Gene05356,>LE01Gene05330,>LE01Gene14216,>LE01Gene…	0.0480795		Cellular component	obsolete endoplasmic reticulum part	GO:0044432	0	0.00825294	1.84566	16	53	466	2849	>LE01Gene04206,>LE01Gene13528,>LE01Gene01107,>LE01Gene11772,>LE01Gene06313,>LE01Gene07617,>LE01Gene13887,>LE01Gene10330,>LE01Gene09341,>LE01Gene00093,>LE01Gene00457,>LE01Gene04859,>LE01Gene08385,>LE01Gene04328,>LE01Gene01648,>LE01Gene10516,	0.0444202
Biological process	nucleoside phosphate catabolic process	GO:1901292	8	0.00277538	2.00422	16	40	1137	5697	>LE01Gene02390,>LE01Gene11222,>LE01Gene09790,>LE01Gene07114,>LE01Gene04902,>LE01Gene14216,>LE01Gene03960,>LE01Gene11106,>LE01Gene10241,>LE01Gene03056,>LE01Gene06597,>LE01Gene03019,>LE01Gene04720,>LE01Gene00733,>LE01Gene08279,>LE01Gene05567,	0.0489312		Cellular component	transporter complex	GO:1990351	3	0.0141204	3.05687	5	10	466	2849	>LE01Gene02435,>LE01Gene05850,>LE01Gene08075,>LE01Gene10655,>LE01Gene02509,	0.0748993
Biological process	cellular amine metabolic process	GO:0044106	6	0.00305097	1.86668	19	51	1137	5697	>LE01Gene06881,>LE01Gene01520,>LE01Gene09080,>LE01Gene02893,>LE01Gene04182,>LE01Gene10765,>LE01Gene07177,>LE01Gene08833,>LE01Gene03960,>LE01Gene07012,>LE01Gene12832,>LE01Gene06195,>LE01Gene06514,>LE01Gene02540,>LE01Gene04720,>LE01Gene06090,>LE01Gene06091,>LE01Gene08279,>LE01Gene04245,	0.0532115		Cellular component	vesicle coat	GO:0030120	5	0.0141204	3.05687	5	10	466	2849	>LE01Gene13972,>LE01Gene00183,>LE01Gene13329,>LE01Gene08390,>LE01Gene05102,	0.0748993
Biological process	heterocycle catabolic process	GO:0046700	5	0.00314017	1.65054	28	85	1137	5697	>LE01Gene05977,>LE01Gene09080,>LE01Gene02390,>LE01Gene11222,>LE01Gene00116,>LE01Gene09790,>LE01Gene07114,>LE01Gene04902,>LE01Gene10314,>LE01Gene02230,>LE01Gene14216,>LE01Gene03960,>LE01Gene11106,>LE01Gene10241,>LE01Gene03056,>LE01Gene06597,>LE01Gene02129,>LE01Gene03019,>LE01Gene02142,>LE01Gene06992,>LE01Gene02540,>LE01Gene03875,>LE01Gene04720,>LE01Gene00733,>LE01Gene06090,>LE01Gene06091,>LE01Gene…	0.0541846		Cellular component	coated vesicle membrane	GO:0030662	7	0.0141204	3.05687	5	10	466	2849	>LE01Gene13972,>LE01Gene00183,>LE01Gene13329,>LE01Gene08390,>LE01Gene05102,	0.0748993
Biological process	response to external stimulus	GO:0009605	3	0.00331854	2.22691	12	27	1137	5697	>LE01Gene11295,>LE01Gene02390,>LE01Gene11222,>LE01Gene01407,>LE01Gene04902,>LE01Gene03058,>LE01Gene03056,>LE01Gene06597,>LE01Gene00733,>LE01Gene11424,>LE01Gene04299,>LE01Gene04295,	0.0566597		Cellular component	chromatin	GO:0000785	3	0.0152714	1.70383	17	61	466	2849	>LE01Gene01532,>LE01Gene10066,>LE01Gene04609,>LE01Gene12144,>LE01Gene05416,>LE01Gene08065,>LE01Gene08055,>LE01Gene09319,>LE01Gene05387,>LE01Gene13783,>LE01Gene13301,>LE01Gene13300,>LE01Gene13784,>LE01Gene03840,>LE01Gene03839,>LE01Gene00778,>LE01Gene11431,	0.0776297
Biological process	cellular nitrogen compound catabolic process	GO:0044270	5	0.00371611	1.64982	27	82	1137	5697	>LE01Gene05977,>LE01Gene09080,>LE01Gene02390,>LE01Gene11222,>LE01Gene00116,>LE01Gene09790,>LE01Gene07114,>LE01Gene04902,>LE01Gene10314,>LE01Gene02230,>LE01Gene14216,>LE01Gene03960,>LE01Gene11106,>LE01Gene10241,>LE01Gene03056,>LE01Gene06597,>LE01Gene02129,>LE01Gene03019,>LE01Gene02142,>LE01Gene02540,>LE01Gene03875,>LE01Gene04720,>LE01Gene00733,>LE01Gene06090,>LE01Gene06091,>LE01Gene08279,>LE01Gene…	0.0627868		Cellular component	cytoplasmic vesicle	GO:0031410	7	0.0172047	2.62017	6	14	466	2849	>LE01Gene01152,>LE01Gene13972,>LE01Gene00183,>LE01Gene13329,>LE01Gene08390,>LE01Gene05102,	0.0839587
Biological process	cellular carbohydrate catabolic process	GO:0044275	6	0.0041292	2.50528	9	18	1137	5697	>LE01Gene06823,>LE01Gene10050,>LE01Gene01448,>LE01Gene11660,>LE01Gene04829,>LE01Gene09248,>LE01Gene12864,>LE01Gene01683,>LE01Gene04299,	0.0690471		Cellular component	outer membrane	GO:0019867	4	0.0172047	2.62017	6	14	466	2849	>LE01Gene05511,>LE01Gene07697,>LE01Gene00937,>LE01Gene09688,>LE01Gene00747,>LE01Gene09510,	0.0839587
Biological process	glucan catabolic process	GO:0009251	7	0.00413154	2.6723	8	15	1137	5697	>LE01Gene10050,>LE01Gene11660,>LE01Gene04829,>LE01Gene09248,>LE01Gene13789,>LE01Gene12864,>LE01Gene11400,>LE01Gene04299,	0.0683811		Cellular component	intracellular vesicle	GO:0097708	6	0.0172047	2.62017	6	14	466	2849	>LE01Gene01152,>LE01Gene13972,>LE01Gene00183,>LE01Gene13329,>LE01Gene08390,>LE01Gene05102,	0.0839587
Biological process	aromatic amino acid family biosynthetic process	GO:0009073	9	0.00420257	2.1012	13	31	1137	5697	>LE01Gene06881,>LE01Gene01520,>LE01Gene02893,>LE01Gene04182,>LE01Gene10765,>LE01Gene07177,>LE01Gene07012,>LE01Gene12832,>LE01Gene06195,>LE01Gene05603,>LE01Gene01640,>LE01Gene04720,>LE01Gene07329,	0.0688542		Cellular component	catalytic complex	GO:1902494	3	0.0180713	1.27627	62	297	466	2849	>LE01Gene06839,>LE01Gene06843,>LE01Gene14433,>LE01Gene02032,>LE01Gene04224,>LE01Gene01541,>LE01Gene01553,>LE01Gene02435,>LE01Gene01107,>LE01Gene10066,>LE01Gene12240,>LE01Gene01563,>LE01Gene00640,>LE01Gene06313,>LE01Gene04172,>LE01Gene05850,>LE01Gene01014,>LE01Gene01076,>LE01Gene12179,>LE01Gene12551,>LE01Gene08075,>LE01Gene09374,>LE01Gene03650,>LE01Gene08458,>LE01Gene11633,>LE01Gene11678,>LE01Gene…	0.084796
Biological process	erythrose 4-phosphate/phosphoenolpyruvate family amino acid metabolic process	GO:1902221	9	0.00420257	2.1012	13	31	1137	5697	>LE01Gene06881,>LE01Gene01520,>LE01Gene02893,>LE01Gene04182,>LE01Gene10765,>LE01Gene07177,>LE01Gene02634,>LE01Gene07012,>LE01Gene12832,>LE01Gene06195,>LE01Gene03883,>LE01Gene03875,>LE01Gene04720,	0.0688542		Cellular component	organelle subcompartment	GO:0031984	3	0.018648	1.6425	18	67	466	2849	>LE01Gene04206,>LE01Gene13528,>LE01Gene01107,>LE01Gene11772,>LE01Gene06313,>LE01Gene07617,>LE01Gene13887,>LE01Gene08458,>LE01Gene10330,>LE01Gene09341,>LE01Gene00093,>LE01Gene00457,>LE01Gene04859,>LE01Gene08385,>LE01Gene04328,>LE01Gene01648,>LE01Gene10516,>LE01Gene10924,	0.0863947
Biological process	L-phenylalanine metabolic process	GO:0006558	10	0.00420257	2.1012	13	31	1137	5697	>LE01Gene06881,>LE01Gene01520,>LE01Gene02893,>LE01Gene04182,>LE01Gene10765,>LE01Gene07177,>LE01Gene02634,>LE01Gene07012,>LE01Gene12832,>LE01Gene06195,>LE01Gene03883,>LE01Gene03875,>LE01Gene04720,	0.0688542		Cellular component	large ribosomal subunit	GO:0015934	5	0.0224684	2.77897	5	11	466	2849	>LE01Gene00242,>LE01Gene08921,>LE01Gene00147,>LE01Gene00960,>LE01Gene01648,	0.102793
Biological process	IMP metabolic process	GO:0046040	11	0.00460065	3.57897	5	7	1137	5697	>LE01Gene06818,>LE01Gene00950,>LE01Gene07172,>LE01Gene00453,>LE01Gene06507,	0.0731593		Cellular component	mitochondrial outer membrane	GO:0005741	7	0.0224684	2.77897	5	11	466	2849	>LE01Gene07697,>LE01Gene00937,>LE01Gene09688,>LE01Gene00747,>LE01Gene09510,	0.102793
Biological process	IMP biosynthetic process	GO:0006188	12	0.00460065	3.57897	5	7	1137	5697	>LE01Gene06818,>LE01Gene00950,>LE01Gene07172,>LE01Gene00453,>LE01Gene06507,	0.0731593		Cellular component	organelle outer membrane	GO:0031968	6	0.0224684	2.77897	5	11	466	2849	>LE01Gene07697,>LE01Gene00937,>LE01Gene09688,>LE01Gene00747,>LE01Gene09510,	0.102793
Biological process	cell wall polysaccharide metabolic process	GO:0010383	7	0.00460065	3.57897	5	7	1137	5697	>LE01Gene06823,>LE01Gene03223,>LE01Gene01448,>LE01Gene02639,>LE01Gene01683,	0.0731593		Cellular component	coated vesicle	GO:0030135	8	0.0224684	2.77897	5	11	466	2849	>LE01Gene13972,>LE01Gene00183,>LE01Gene13329,>LE01Gene08390,>LE01Gene05102,	0.102793
Biological process	cell wall polysaccharide catabolic process	GO:0044347	8	0.00460065	3.57897	5	7	1137	5697	>LE01Gene06823,>LE01Gene03223,>LE01Gene01448,>LE01Gene02639,>LE01Gene01683,	0.0731593		Cellular component	cytoskeleton	GO:0005856	6	0.0227012	1.54685	21	83	466	2849	>LE01Gene05546,>LE01Gene01018,>LE01Gene05437,>LE01Gene01434,>LE01Gene01435,>LE01Gene11633,>LE01Gene12981,>LE01Gene03108,>LE01Gene00089,>LE01Gene11519,>LE01Gene10693,>LE01Gene03067,>LE01Gene09610,>LE01Gene03433,>LE01Gene09135,>LE01Gene09130,>LE01Gene00325,>LE01Gene00755,>LE01Gene00757,>LE01Gene08622,>LE01Gene07300,	0.0989124
Biological process	ribose phosphate metabolic process	GO:0019693	6	0.00512326	1.48751	38	128	1137	5697	>LE01Gene06818,>LE01Gene02434,>LE01Gene01586,>LE01Gene00256,>LE01Gene06393,>LE01Gene10460,>LE01Gene11712,>LE01Gene01078,>LE01Gene02390,>LE01Gene11222,>LE01Gene09790,>LE01Gene00950,>LE01Gene07114,>LE01Gene07172,>LE01Gene04902,>LE01Gene02725,>LE01Gene14216,>LE01Gene07910,>LE01Gene03960,>LE01Gene00453,>LE01Gene11106,>LE01Gene02678,>LE01Gene10632,>LE01Gene03058,>LE01Gene03056,>LE01Gene06597,>LE01Gene…	0.0783955		Cellular component	organelle lumen	GO:0043233	4	0.0242299	1.38578	34	150	466	2849	>LE01Gene03323,>LE01Gene02019,>LE01Gene10066,>LE01Gene06315,>LE01Gene07645,>LE01Gene07689,>LE01Gene04172,>LE01Gene01045,>LE01Gene03236,>LE01Gene02392,>LE01Gene01474,>LE01Gene01815,>LE01Gene06270,>LE01Gene01845,>LE01Gene10312,>LE01Gene12981,>LE01Gene08839,>LE01Gene05387,>LE01Gene04875,>LE01Gene13399,>LE01Gene11108,>LE01Gene00461,>LE01Gene10655,>LE01Gene11913,>LE01Gene00801,>LE01Gene03424,>LE01Gene…	0.104331
Biological process	nucleoside diphosphate metabolic process	GO:0009132	8	0.00576597	1.92714	15	39	1137	5697	>LE01Gene02434,>LE01Gene02390,>LE01Gene11222,>LE01Gene09790,>LE01Gene07114,>LE01Gene04902,>LE01Gene14216,>LE01Gene03960,>LE01Gene03056,>LE01Gene06597,>LE01Gene03019,>LE01Gene04720,>LE01Gene00733,>LE01Gene08279,>LE01Gene05567,	0.0874056		Cellular component	membrane-enclosed lumen	GO:0031974	3	0.0242299	1.38578	34	150	466	2849	>LE01Gene03323,>LE01Gene02019,>LE01Gene10066,>LE01Gene06315,>LE01Gene07645,>LE01Gene07689,>LE01Gene04172,>LE01Gene01045,>LE01Gene03236,>LE01Gene02392,>LE01Gene01474,>LE01Gene01815,>LE01Gene06270,>LE01Gene01845,>LE01Gene10312,>LE01Gene12981,>LE01Gene08839,>LE01Gene05387,>LE01Gene04875,>LE01Gene13399,>LE01Gene11108,>LE01Gene00461,>LE01Gene10655,>LE01Gene11913,>LE01Gene00801,>LE01Gene03424,>LE01Gene…	0.104331
Biological process	nucleotide catabolic process	GO:0009166	9	0.00576597	1.92714	15	39	1137	5697	>LE01Gene02390,>LE01Gene11222,>LE01Gene09790,>LE01Gene07114,>LE01Gene04902,>LE01Gene14216,>LE01Gene03960,>LE01Gene11106,>LE01Gene03056,>LE01Gene06597,>LE01Gene03019,>LE01Gene04720,>LE01Gene00733,>LE01Gene08279,>LE01Gene05567,	0.0874056		Cellular component	intracellular organelle lumen	GO:0070013	5	0.0242299	1.38578	34	150	466	2849	>LE01Gene03323,>LE01Gene02019,>LE01Gene10066,>LE01Gene06315,>LE01Gene07645,>LE01Gene07689,>LE01Gene04172,>LE01Gene01045,>LE01Gene03236,>LE01Gene02392,>LE01Gene01474,>LE01Gene01815,>LE01Gene06270,>LE01Gene01845,>LE01Gene10312,>LE01Gene12981,>LE01Gene08839,>LE01Gene05387,>LE01Gene04875,>LE01Gene13399,>LE01Gene11108,>LE01Gene00461,>LE01Gene10655,>LE01Gene11913,>LE01Gene00801,>LE01Gene03424,>LE01Gene…	0.104331
Biological process	nucleotide phosphorylation	GO:0046939	7	0.00576597	1.92714	15	39	1137	5697	>LE01Gene02434,>LE01Gene02390,>LE01Gene11222,>LE01Gene09790,>LE01Gene07114,>LE01Gene04902,>LE01Gene14216,>LE01Gene03960,>LE01Gene03056,>LE01Gene06597,>LE01Gene03019,>LE01Gene04720,>LE01Gene00733,>LE01Gene08279,>LE01Gene05567,	0.0874056		Cellular component	nuclear pore	GO:0005643	4	0.0248069	2.44549	6	15	466	2849	>LE01Gene14383,>LE01Gene01892,>LE01Gene14308,>LE01Gene01740,>LE01Gene03081,>LE01Gene03010,	0.103174
Biological process	pyruvate family amino acid metabolic process	GO:0009078	9	0.0059508	2.27752	10	22	1137	5697	>LE01Gene01586,>LE01Gene02448,>LE01Gene10460,>LE01Gene04519,>LE01Gene03256,>LE01Gene12537,>LE01Gene12831,>LE01Gene12401,>LE01Gene11906,>LE01Gene06507,	0.0877473		Cellular component	fungal-type cell wall	GO:0009277	5	0.0248069	2.44549	6	15	466	2849	>LE01Gene13539,>LE01Gene13506,>LE01Gene13552,>LE01Gene10826,>LE01Gene08487,>LE01Gene03013,	0.103174
Biological process	alanine metabolic process	GO:0006522	10	0.0059508	2.27752	10	22	1137	5697	>LE01Gene01586,>LE01Gene02448,>LE01Gene10460,>LE01Gene04519,>LE01Gene03256,>LE01Gene12537,>LE01Gene12831,>LE01Gene12401,>LE01Gene11906,>LE01Gene06507,	0.0877473		Cellular component	nuclear envelope	GO:0005635	5	0.0251101	2.25243	7	19	466	2849	>LE01Gene14383,>LE01Gene01892,>LE01Gene14308,>LE01Gene01740,>LE01Gene03081,>LE01Gene03010,>LE01Gene14074,	0.102114
Biological process	cell wall macromolecule metabolic process	GO:0044036	6	0.0059508	2.27752	10	22	1137	5697	>LE01Gene06823,>LE01Gene07656,>LE01Gene03223,>LE01Gene01448,>LE01Gene11646,>LE01Gene07980,>LE01Gene02639,>LE01Gene10125,>LE01Gene10124,>LE01Gene01683,	0.0877473		Cellular component	cell periphery	GO:0071944	3	0.0287283	1.5721	18	70	466	2849	>LE01Gene13539,>LE01Gene13506,>LE01Gene13552,>LE01Gene08573,>LE01Gene10826,>LE01Gene01018,>LE01Gene11280,>LE01Gene08487,>LE01Gene04005,>LE01Gene13329,>LE01Gene11519,>LE01Gene02605,>LE01Gene03067,>LE01Gene02599,>LE01Gene05601,>LE01Gene03013,>LE01Gene05598,>LE01Gene07300,	0.11068
Biological process	aromatic amino acid family catabolic process	GO:0009074	9	0.00625411	3.00633	6	10	1137	5697	>LE01Gene09080,>LE01Gene02634,>LE01Gene03883,>LE01Gene02540,>LE01Gene06090,>LE01Gene06091,	0.0897714		Cellular component	bounding membrane of organelle	GO:0098588	5	0.0325053	1.57475	17	66	466	2849	>LE01Gene01152,>LE01Gene13972,>LE01Gene07270,>LE01Gene07697,>LE01Gene06352,>LE01Gene00183,>LE01Gene01081,>LE01Gene08458,>LE01Gene00937,>LE01Gene13329,>LE01Gene08390,>LE01Gene09688,>LE01Gene03405,>LE01Gene00747,>LE01Gene05102,>LE01Gene10924,>LE01Gene09510,	0.123927
Biological process	small molecule biosynthetic process	GO:0044283	4	0.006408	1.33756	63	236	1137	5697	>LE01Gene00290,>LE01Gene06881,>LE01Gene03342,>LE01Gene10024,>LE01Gene01520,>LE01Gene02434,>LE01Gene10056,>LE01Gene02893,>LE01Gene00628,>LE01Gene01963,>LE01Gene06329,>LE01Gene08952,>LE01Gene01907,>LE01Gene04182,>LE01Gene02397,>LE01Gene01078,>LE01Gene02390,>LE01Gene11222,>LE01Gene01407,>LE01Gene09790,>LE01Gene11602,>LE01Gene07114,>LE01Gene10765,>LE01Gene10334,>LE01Gene07177,>LE01Gene01873,>LE01Gene…	0.0911735		Cellular component	cellular anatomical entity	GO:0110165	2	0.0327755	1.01237	461	2784	466	2849	>LE01Gene00297,>LE01Gene03323,>LE01Gene06839,>LE01Gene06843,>LE01Gene01152,>LE01Gene02484,>LE01Gene01153,>LE01Gene05510,>LE01Gene05511,>LE01Gene00276,>LE01Gene01123,>LE01Gene14433,>LE01Gene14438,>LE01Gene12259,>LE01Gene00288,>LE01Gene12270,>LE01Gene03366,>LE01Gene05546,>LE01Gene02032,>LE01Gene05547,>LE01Gene02038,>LE01Gene04224,>LE01Gene06407,>LE01Gene03381,>LE01Gene03345,>LE01Gene02019,>LE01Gene…	0.123669
Biological process	organic hydroxy compound biosynthetic process	GO:1901617	5	0.00647477	2.37342	9	19	1137	5697	>LE01Gene03342,>LE01Gene09790,>LE01Gene01873,>LE01Gene06236,>LE01Gene03960,>LE01Gene03019,>LE01Gene02135,>LE01Gene08279,>LE01Gene05579,	0.0913224		Cellular component	proton-transporting two-sector ATPase complex, catalytic domain	GO:0033178	4	0.0334558	2.54739	5	12	466	2849	>LE01Gene13008,>LE01Gene01885,>LE01Gene03585,>LE01Gene06610,>LE01Gene03007,	0.124947
Biological process	carbon utilization	GO:0015976	6	0.00647477	2.37342	9	19	1137	5697	>LE01Gene02390,>LE01Gene11222,>LE01Gene01407,>LE01Gene04902,>LE01Gene03058,>LE01Gene03056,>LE01Gene06597,>LE01Gene00733,>LE01Gene11424,	0.0913224		Cellular component	supramolecular complex	GO:0099080	3	0.0338078	1.69103	13	47	466	2849	>LE01Gene05546,>LE01Gene05437,>LE01Gene01434,>LE01Gene01435,>LE01Gene11633,>LE01Gene12981,>LE01Gene03108,>LE01Gene00089,>LE01Gene11519,>LE01Gene09130,>LE01Gene00755,>LE01Gene00757,>LE01Gene08622,	0.117844
Biological process	dicarboxylic acid metabolic process	GO:0043648	7	0.00664076	1.72778	20	58	1137	5697	>LE01Gene01586,>LE01Gene02448,>LE01Gene10460,>LE01Gene06329,>LE01Gene04519,>LE01Gene03256,>LE01Gene12537,>LE01Gene07108,>LE01Gene07177,>LE01Gene07910,>LE01Gene12831,>LE01Gene05292,>LE01Gene12401,>LE01Gene06195,>LE01Gene11906,>LE01Gene06507,>LE01Gene06992,>LE01Gene02540,>LE01Gene11424,>LE01Gene06090,	0.0920624		Cellular component	vesicle	GO:0031982	5	0.0343592	2.29265	6	16	466	2849	>LE01Gene01152,>LE01Gene13972,>LE01Gene00183,>LE01Gene13329,>LE01Gene08390,>LE01Gene05102,	0.118637
Biological process	small molecule catabolic process	GO:0044282	4	0.00714199	1.67018	22	66	1137	5697	>LE01Gene04619,>LE01Gene09080,>LE01Gene11318,>LE01Gene07676,>LE01Gene02397,>LE01Gene01407,>LE01Gene00116,>LE01Gene14216,>LE01Gene03960,>LE01Gene02634,>LE01Gene00476,>LE01Gene05216,>LE01Gene02192,>LE01Gene06587,>LE01Gene05620,>LE01Gene06992,>LE01Gene00332,>LE01Gene03883,>LE01Gene02540,>LE01Gene06090,>LE01Gene06091,>LE01Gene08279,	0.0949534		Cellular component	nuclear chromosome	GO:0000228	7	0.044692	1.83412	9	30	466	2849	>LE01Gene10066,>LE01Gene04172,>LE01Gene01474,>LE01Gene06270,>LE01Gene01845,>LE01Gene05387,>LE01Gene11108,>LE01Gene10546,>LE01Gene11404,	0.152872
Biological process	obsolete cofactor biosynthetic process	GO:0051188	0	0.00715694	1.48618	35	118	1137	5697	>LE01Gene05509,>LE01Gene13915,>LE01Gene01984,>LE01Gene01988,>LE01Gene10457,>LE01Gene08952,>LE01Gene01907,>LE01Gene02390,>LE01Gene01422,>LE01Gene11222,>LE01Gene09790,>LE01Gene11602,>LE01Gene07114,>LE01Gene01873,>LE01Gene04902,>LE01Gene05356,>LE01Gene06236,>LE01Gene14216,>LE01Gene03112,>LE01Gene03960,>LE01Gene09272,>LE01Gene01346,>LE01Gene12813,>LE01Gene03056,>LE01Gene02192,>LE01Gene06597,>LE01Gene…	0.0943785		Cellular component	integral component of endoplasmic reticulum membrane	GO:0030176	6	0.0472589	2.35144	5	13	466	2849	>LE01Gene13528,>LE01Gene13887,>LE01Gene00457,>LE01Gene08385,>LE01Gene04328,	0.160155
Biological process	nucleobase metabolic process	GO:0009112	7	0.00762576	1.54581	29	94	1137	5697	>LE01Gene13132,>LE01Gene06818,>LE01Gene13510,>LE01Gene02434,>LE01Gene01586,>LE01Gene02836,>LE01Gene10460,>LE01Gene01078,>LE01Gene05436,>LE01Gene04567,>LE01Gene08929,>LE01Gene11277,>LE01Gene00116,>LE01Gene00950,>LE01Gene10334,>LE01Gene07172,>LE01Gene09327,>LE01Gene05330,>LE01Gene04059,>LE01Gene02230,>LE01Gene07910,>LE01Gene00453,>LE01Gene10241,>LE01Gene01744,>LE01Gene03056,>LE01Gene08708,>LE01Gene…	0.0997499		Cellular component	intrinsic component of endoplasmic reticulum membrane	GO:0031227	5	0.0472589	2.35144	5	13	466	2849	>LE01Gene13528,>LE01Gene13887,>LE01Gene00457,>LE01Gene08385,>LE01Gene04328,	0.160155
Biological process	carboxylic acid biosynthetic process	GO:0046394	7	0.00857111	1.38222	48	174	1137	5697	>LE01Gene06881,>LE01Gene01520,>LE01Gene10056,>LE01Gene02893,>LE01Gene00628,>LE01Gene01963,>LE01Gene06329,>LE01Gene08952,>LE01Gene01907,>LE01Gene04182,>LE01Gene02397,>LE01Gene02390,>LE01Gene11222,>LE01Gene01407,>LE01Gene09790,>LE01Gene07114,>LE01Gene10765,>LE01Gene10334,>LE01Gene07177,>LE01Gene04902,>LE01Gene14216,>LE01Gene01364,>LE01Gene12083,>LE01Gene07980,>LE01Gene03960,>LE01Gene09272,>LE01Gene…	0.103749		Biological process	cellular respiration	GO:0045333	6	3.84137e-14	3.76592	36	70	778	5697	>LE01Gene01135,>LE01Gene01549,>LE01Gene02435,>LE01Gene12240,>LE01Gene01574,>LE01Gene11377,>LE01Gene09851,>LE01Gene13008,>LE01Gene05850,>LE01Gene03245,>LE01Gene01076,>LE01Gene08075,>LE01Gene01885,>LE01Gene09374,>LE01Gene08443,>LE01Gene10348,>LE01Gene08432,>LE01Gene03585,>LE01Gene05778,>LE01Gene02208,>LE01Gene06179,>LE01Gene10683,>LE01Gene10685,>LE01Gene03065,>LE01Gene02186,>LE01Gene06114,>LE01Gene…	4.62501e-11
Biological process	response to extracellular stimulus	GO:0009991	4	0.00867757	2.1785	10	23	1137	5697	>LE01Gene11295,>LE01Gene02390,>LE01Gene11222,>LE01Gene01407,>LE01Gene04902,>LE01Gene03058,>LE01Gene03056,>LE01Gene06597,>LE01Gene00733,>LE01Gene11424,	0.104259		Biological process	nucleoside triphosphate metabolic process	GO:0009141	8	8.03801e-14	3.37334	41	89	778	5697	>LE01Gene04224,>LE01Gene01553,>LE01Gene02435,>LE01Gene12240,>LE01Gene11377,>LE01Gene12649,>LE01Gene06315,>LE01Gene05464,>LE01Gene09851,>LE01Gene13008,>LE01Gene05850,>LE01Gene04586,>LE01Gene01076,>LE01Gene08075,>LE01Gene01885,>LE01Gene05820,>LE01Gene14307,>LE01Gene13422,>LE01Gene08432,>LE01Gene03585,>LE01Gene06610,>LE01Gene05778,>LE01Gene01780,>LE01Gene02208,>LE01Gene13331,>LE01Gene10284,>LE01Gene…	4.83888e-11
Biological process	aspartate metabolic process	GO:0006531	10	0.00867757	2.1785	10	23	1137	5697	>LE01Gene01586,>LE01Gene02448,>LE01Gene10460,>LE01Gene04519,>LE01Gene03256,>LE01Gene12537,>LE01Gene12831,>LE01Gene12401,>LE01Gene11906,>LE01Gene06507,	0.104259		Biological process	ATP metabolic process	GO:0046034	11	8.9595e-14	3.48271	39	82	778	5697	>LE01Gene04224,>LE01Gene01553,>LE01Gene02435,>LE01Gene12240,>LE01Gene11377,>LE01Gene12649,>LE01Gene06315,>LE01Gene09851,>LE01Gene13008,>LE01Gene05850,>LE01Gene04586,>LE01Gene01076,>LE01Gene08075,>LE01Gene01885,>LE01Gene05820,>LE01Gene14307,>LE01Gene13422,>LE01Gene08432,>LE01Gene03585,>LE01Gene06610,>LE01Gene05778,>LE01Gene01780,>LE01Gene02208,>LE01Gene10284,>LE01Gene03934,>LE01Gene06179,>LE01Gene…	3.59575e-11
Biological process	xenobiotic catabolic process	GO:0042178	5	0.00889749	1.89589	14	37	1137	5697	>LE01Gene09060,>LE01Gene07656,>LE01Gene08997,>LE01Gene11646,>LE01Gene02230,>LE01Gene03960,>LE01Gene02634,>LE01Gene02142,>LE01Gene10125,>LE01Gene10124,>LE01Gene03883,>LE01Gene03875,>LE01Gene08279,>LE01Gene04245,	0.105341		Biological process	aerobic respiration	GO:0009060	7	1.50657e-13	3.71437	35	69	778	5697	>LE01Gene01135,>LE01Gene01549,>LE01Gene02435,>LE01Gene12240,>LE01Gene01574,>LE01Gene11377,>LE01Gene09851,>LE01Gene13008,>LE01Gene05850,>LE01Gene01076,>LE01Gene08075,>LE01Gene01885,>LE01Gene09374,>LE01Gene08443,>LE01Gene10348,>LE01Gene08432,>LE01Gene03585,>LE01Gene05778,>LE01Gene02208,>LE01Gene06179,>LE01Gene10683,>LE01Gene10685,>LE01Gene03065,>LE01Gene02186,>LE01Gene06114,>LE01Gene03007,>LE01Gene…	4.53478e-11
Biological process	gluconeogenesis	GO:0006094	8	0.00889749	1.89589	14	37	1137	5697	>LE01Gene02390,>LE01Gene11222,>LE01Gene09790,>LE01Gene07114,>LE01Gene04902,>LE01Gene14216,>LE01Gene03960,>LE01Gene03056,>LE01Gene06597,>LE01Gene03019,>LE01Gene04720,>LE01Gene00733,>LE01Gene08279,>LE01Gene05567,	0.105341		Biological process	purine nucleoside triphosphate metabolic process	GO:0009144	9	2.39697e-13	3.39979	39	84	778	5697	>LE01Gene04224,>LE01Gene01553,>LE01Gene02435,>LE01Gene12240,>LE01Gene11377,>LE01Gene12649,>LE01Gene06315,>LE01Gene09851,>LE01Gene13008,>LE01Gene05850,>LE01Gene04586,>LE01Gene01076,>LE01Gene08075,>LE01Gene01885,>LE01Gene05820,>LE01Gene14307,>LE01Gene13422,>LE01Gene08432,>LE01Gene03585,>LE01Gene06610,>LE01Gene05778,>LE01Gene01780,>LE01Gene02208,>LE01Gene10284,>LE01Gene03934,>LE01Gene06179,>LE01Gene…	5.77191e-11
Biological process	purine nucleobase metabolic process	GO:0006144	8	0.00900664	1.58562	25	79	1137	5697	>LE01Gene13132,>LE01Gene06818,>LE01Gene02434,>LE01Gene01586,>LE01Gene02836,>LE01Gene10460,>LE01Gene04567,>LE01Gene08929,>LE01Gene11277,>LE01Gene00950,>LE01Gene10334,>LE01Gene07172,>LE01Gene09327,>LE01Gene05330,>LE01Gene04059,>LE01Gene02230,>LE01Gene07910,>LE01Gene00453,>LE01Gene10241,>LE01Gene01744,>LE01Gene03056,>LE01Gene08708,>LE01Gene06507,>LE01Gene00352,>LE01Gene04726,	0.105099		Biological process	purine ribonucleoside triphosphate metabolic process	GO:0009205	10	2.39697e-13	3.39979	39	84	778	5697	>LE01Gene04224,>LE01Gene01553,>LE01Gene02435,>LE01Gene12240,>LE01Gene11377,>LE01Gene12649,>LE01Gene06315,>LE01Gene09851,>LE01Gene13008,>LE01Gene05850,>LE01Gene04586,>LE01Gene01076,>LE01Gene08075,>LE01Gene01885,>LE01Gene05820,>LE01Gene14307,>LE01Gene13422,>LE01Gene08432,>LE01Gene03585,>LE01Gene06610,>LE01Gene05778,>LE01Gene01780,>LE01Gene02208,>LE01Gene10284,>LE01Gene03934,>LE01Gene06179,>LE01Gene…	5.77191e-11
[truncated: 191 more rows]

## Sheet: ow_3-VS-ow_2
Up-regulated													Down-regulated
Class	GO_Name	GO_ID	GO_Level	P_value	EnrichmentScore	HitsGenesCountsInSelectedSet	HitsGenesCountsInBackground	AllGenesCountsInSelectedSet	AllGenesCountsInBackground	GenesOfSelectedSetInGOterm	corrected p-value(BH method)		Class	GO_Name	GO_ID	GO_Level	P_value	EnrichmentScore	HitsGenesCountsInSelectedSet	HitsGenesCountsInBackground	AllGenesCountsInSelectedSet	AllGenesCountsInBackground	GenesOfSelectedSetInGOterm	corrected p-value(BH method)
Molecular function	hydrolase activity, hydrolyzing O-glycosyl compounds	GO:0004553	5	1.72233e-08	7.216	13	199	63	6959	>LE01Gene06326,>LE01Gene07930,>LE01Gene05323,>LE01Gene12496,>LE01Gene05218,>LE01Gene07086,>LE01Gene03370,>LE01Gene05156,>LE01Gene07975,>LE01Gene11318,>LE01Gene03020,>LE01Gene11487,>LE01Gene10050,	2.48015e-06		NA
[truncated: 10 more rows]

## Sheet: cs_2-VS-cs_1
Up-regulated													Down-regulated
[truncated: 323 more rows]

## Sheet: cs_3-VS-cs_1 
Up-regulated													Down-regulated
[truncated: 356 more rows]

## Sheet: cs_3-VS-cs_2
Up-regulated													Down-regulated
[truncated: 2 more rows]

## Sheet: ow_1-VS-cs_1
Up-regulated													Down-regulated
[truncated: 71 more rows]

[truncated: 2 more sheets: ow_2-VS-cs_2, ow_3-VS-cs_3]
