# Supplementary material for: Comparative analysis of simulated in-situ colonization and degradation by Lentinula edodes on oak wafer and corn stalk
Source: Front Microbiol. 2023 Nov 23;14:1286064. doi: 10.3389/fmicb.2023.1286064 (PMC10701760; doi:10.3389/fmicb.2023.1286064)
Supplement: Supplementary file 4 [file Data_Sheet_4.XLSX]

## Sheet: cs_2-VS-cs_1
CAZyme_family	Class	Gene name	Gene_id	cs_1_a	cs_1_b	cs_1_c	cs_2_a	cs_2_b	cs_2_c	log2FoldChange	pvalue	padj	id	sprot_Top_BLASTX_hit	Pfam	eggnog	Kegg	gene_ontology_blast	gene_ontology_pfam
GH15	#N/A	#N/A	LE01Gene04370	0	0	0	8.75476	7.27607	8.11001	10.7229	3.52e-05	0.000123021	LE01Gene04370	AMYG_SCHCM^AMYG_SCHCM^Q:43-1227,H:18-496^48.1%ID^E:6.2e-102^RecName: Full=Glucoamylase ARB_02327-1 {ECO:0000305}	PF00723.20^Glyco_hydro_15^Glycosyl hydrolases family 15^153-362^E:3.9e-29	COG3387^glycoside hydrolase 15-related	KEGG:scm:SCHCODRAFT_57589`KO:K01178	GO:0005576^cellular_component^extracellular region`GO:0004339^molecular_function^glucan 1,4-alpha-glucosidase activity`GO:2001070^molecular_function^starch binding`GO:0000272^biological_process^polysaccharide catabolic process	.
AA9	Cellulase	Endo-beta-1,4-glucanase	LE01Gene10266	5.52341	5.29729	4.7266	12.8611	8.26704	5.32388	6.16101	2.46e-05	8.94e-05	LE01Gene10266	EGLD_NEOFI^EGLD_NEOFI^Q:62-841,H:2-234^31.9%ID^E:2.8e-20^RecName: Full=Probable endo-beta-1,4-glucanase D	PF03443.13^Glyco_hydro_61^Glycosyl hydrolase family 61^23-219^E:1.5e-52	.	KEGG:nfi:NFIA_099510`KO:K19356	GO:0005576^cellular_component^extracellular region`GO:0008810^molecular_function^cellulase activity`GO:0030248^molecular_function^cellulose binding`GO:0030245^biological_process^cellulose catabolic process	.
GH12	Cellulase	Endo-beta-1,4-glucanase	LE01Gene13789	4.10419	3.26643	3.19985	9.84836	7.84919	10.2428	6.15934	9.36e-12	1.25e-10	LE01Gene13789	XGEA_ASPNC^XGEA_ASPNC^Q:92-817,H:4-240^44.7%ID^E:1.6e-47^RecName: Full=Probable xyloglucan-specific endo-beta-1,4-glucanase A	PF01670.15^Glyco_hydro_12^Glycosyl hydrolase family 12^64-273^E:3.2e-38	.	KEGG:ang:ANI_1_432014`KO:K18576	GO:0005576^cellular_component^extracellular region`GO:0008810^molecular_function^cellulase activity`GO:0033946^molecular_function^xyloglucan-specific endo-beta-1,4-glucanase activity`GO:0071555^biological_process^cell wall organization`GO:0000272^biological_process^polysaccharide catabolic process	GO:0008810^molecular_function^cellulase activity`GO:0000272^biological_process^polysaccharide catabolic process
AA9; CBM1	Cellulase	Endo-beta-1,4-glucanase	LE01Gene09249	5.80462	6.06838	6.01546	13.1896	9.73183	6.6854	5.80039	2.64e-06	1.16e-05	LE01Gene09249	CEL1_AGABI^CEL1_AGABI^Q:47-976,H:18-320^62.6%ID^E:5.1e-106^RecName: Full=Cellulose-growth-specific protein	PF03443.13^Glyco_hydro_61^Glycosyl hydrolase family 61^19-235^E:6.5e-53`PF00734.17^CBM_1^Fungal cellulose binding domain^283-311^E:1.6e-11	.	.	GO:0005576^cellular_component^extracellular region`GO:0030248^molecular_function^cellulose binding`GO:0016798^molecular_function^hydrolase activity, acting on glycosyl bonds`GO:0030245^biological_process^cellulose catabolic process	GO:0030248^molecular_function^cellulose binding`GO:0005975^biological_process^carbohydrate metabolic process`GO:0005576^cellular_component^extracellular region
AA1	Lignin Oxidase	multicopper oxidase	LE01Gene13044	5.43614	5.89341	6.59297	11.9838	12.1283	10.4187	5.65547	2.5e-08	1.67e-07	LE01Gene13044	LAC5_TRAVI^LAC5_TRAVI^Q:34-1602,H:6-527^62.2%ID^E:9e-182^RecName: Full=Laccase-5	.	.	.	.	.
CBM1; GH5	#N/A	#N/A	LE01Gene11268	7.00883	7.02613	7.21331	13.6508	11.0413	9.51491	5.27817	1.83e-05	6.81e-05	LE01Gene11268	MANF_EMENI^MANF_EMENI^Q:1-1323,H:1-433^41.8%ID^E:3.5e-67^RecName: Full=Probable mannan endo-1,4-beta-mannosidase F	PF00734.17^CBM_1^Fungal cellulose binding domain^25-52^E:6e-12`PF00150.17^Cellulase^Cellulase (glycosyl hydrolase family 5)^111-406^E:9.9e-28	.	KEGG:afv:AFLA_069870`KO:K19355	GO:0005576^cellular_component^extracellular region`GO:0030248^molecular_function^cellulose binding`GO:0016985^molecular_function^mannan endo-1,4-beta-mannosidase activity`GO:0005975^biological_process^carbohydrate metabolic process	GO:0030248^molecular_function^cellulose binding`GO:0005975^biological_process^carbohydrate metabolic process`GO:0005576^cellular_component^extracellular region`GO:0004553^molecular_function^hydrolase activity, hydrolyzing O-glycosyl compounds
AA3_4	Lignin Degrading Auxiliary enzyme	Pyranose oxidase	LE01Gene02678	11.0941	10.8171	11.6039	16.493	15.7679	16.6601	5.14714	3.52e-22	2.96e-20	LE01Gene02678	P2OX_TRIMT^P2OX_TRIMT^Q:551-2125,H:33-548^57.9%ID^E:1.1e-173^RecName: Full=Pyranose 2-oxidase	PF00732.18^GMC_oxred_N^GMC oxidoreductase^297-373^E:3.7e-06`PF05199.12^GMC_oxred_C^GMC oxidoreductase^501-608^E:1.7e-10	.	.	GO:0050660^molecular_function^flavin adenine dinucleotide binding`GO:0050233^molecular_function^pyranose oxidase activity	GO:0016614^molecular_function^oxidoreductase activity, acting on CH-OH group of donors`GO:0050660^molecular_function^flavin adenine dinucleotide binding`GO:0055114^biological_process^oxidation-reduction process
CBM1; GH7	Cellulase	1,4-beta-cellobiosidase	LE01Gene12864	8.3159	8.34353	7.61256	14.6089	10.6587	10.9107	5.09229	1.39e-05	5.31e-05	LE01Gene12864	GUX2_AGABI^GUX2_AGABI^Q:837-2195,H:1-450^62.8%ID^E:2.7e-167^RecName: Full=Exoglucanase	PF00840.19^Glyco_hydro_7^Glycosyl hydrolase family 7^22-453^E:4.1e-200	.	.	GO:0005576^cellular_component^extracellular region`GO:0016162^molecular_function^cellulose 1,4-beta-cellobiosidase activity`GO:0030248^molecular_function^cellulose binding`GO:0030245^biological_process^cellulose catabolic process	GO:0004553^molecular_function^hydrolase activity, hydrolyzing O-glycosyl compounds`GO:0005975^biological_process^carbohydrate metabolic process
AA2	Lignin Oxidase	Manganese peroxidase	LE01Gene08997	9.48104	9.48903	9.1836	13.8307	13.1076	15.2651	4.96364	9.92e-11	1.07e-09	LE01Gene08997	PEM2_PHLRA^PEM2_PHLRA^Q:1487-2656,H:5-390^63.4%ID^E:1.1e-135^RecName: Full=Manganese peroxidase 2	PF00141.22^peroxidase^Peroxidase^174-407^E:8.9e-26`PF11895.7^Peroxidase_ext^Fungal peroxidase extension region^413-489^E:1.9e-29	.	KEGG:ag:CAC85963`KO:K20205	GO:0005576^cellular_component^extracellular region`GO:0020037^molecular_function^heme binding`GO:0016689^molecular_function^manganese peroxidase activity`GO:0046872^molecular_function^metal ion binding`GO:0042744^biological_process^hydrogen peroxide catabolic process`GO:0046274^biological_process^lignin catabolic process`GO:0006979^biological_process^response to oxidative stress	GO:0004601^molecular_function^peroxidase activity`GO:0020037^molecular_function^heme binding`GO:0006979^biological_process^response to oxidative stress`GO:0055114^biological_process^oxidation-reduction process
GH47	#N/A	#N/A	LE01Gene07086	7.25818	7.03669	8.28618	12.8379	11.1472	12.7576	4.79777	2.6e-16	8.08e-15	LE01Gene07086	MNS1B_ASPPH^MNS1B_ASPPH^Q:190-1533,H:45-504^39.4%ID^E:1e-84^RecName: Full=Mannosyl-oligosaccharide alpha-1,2-mannosidase 1B	PF01532.19^Glyco_hydro_47^Glycosyl hydrolase family 47^47-494^E:4.7e-119	.	.	GO:0060205^cellular_component^cytoplasmic vesicle lumen`GO:0016020^cellular_component^membrane`GO:0005509^molecular_function^calcium ion binding`GO:0004571^molecular_function^mannosyl-oligosaccharide 1,2-alpha-mannosidase activity`GO:0005975^biological_process^carbohydrate metabolic process`GO:0006486^biological_process^protein glycosylation	GO:0004571^molecular_function^mannosyl-oligosaccharide 1,2-alpha-mannosidase activity`GO:0005509^molecular_function^calcium ion binding`GO:0016020^cellular_component^membrane
CBM1; GH131	#N/A	#N/A	LE01Gene03370	6.76803	7.04718	5.56689	12.7611	8.99335	6.50046	4.72211	0.00078977	0.00206883	LE01Gene03370	CBHB_ASPFC^CBHB_ASPFC^Q:941-1039,H:501-532^69.7%ID^E:3.7e-06^RecName: Full=Probable 1,4-beta-D-glucan cellobiohydrolase B	PF00734.17^CBM_1^Fungal cellulose binding domain^313-341^E:5.2e-11	.	.	GO:0005576^cellular_component^extracellular region`GO:0016162^molecular_function^cellulose 1,4-beta-cellobiosidase activity`GO:0030248^molecular_function^cellulose binding`GO:0030245^biological_process^cellulose catabolic process	GO:0030248^molecular_function^cellulose binding`GO:0005975^biological_process^carbohydrate metabolic process`GO:0005576^cellular_component^extracellular region
CBM1; GH7	Cellulase	1,4-beta-cellobiosidase	LE01Gene07961	8.04806	7.39799	7.12202	13.4116	11.6347	9.44762	4.69662	2.32e-09	1.94e-08	LE01Gene07961	GUX1_PHACH^GUX1_PHACH^Q:25-1383,H:1-446^63.4%ID^E:6.7e-164^RecName: Full=Exoglucanase 1	.	.	.	.	.
AA9; CBM1	Cellulase	Endo-beta-1,4-glucanase	LE01Gene05218	7.6751	7.27844	7.41136	13.4114	10.0854	7.94136	4.53613	0.0014072	0.00348256	LE01Gene05218	EGLD_ASPNC^EGLD_ASPNC^Q:82-765,H:6-232^47.5%ID^E:5.2e-48^RecName: Full=Probable endo-beta-1,4-glucanase D	.	.	.	.	.
GH76	#N/A	#N/A	LE01Gene02160	7.97254	7.51596	8.0785	12.7701	11.1719	11.4282	4.10167	5.75e-15	1.36e-13	LE01Gene02160	DCW1_YEAST^DCW1_YEAST^Q:47-1015,H:6-316^25.7%ID^E:5.5e-13^RecName: Full=Mannan endo-1,6-alpha-mannosidase DCW1	PF03663.13^Glyco_hydro_76^Glycosyl hydrolase family 76^50-214^E:4.6e-12`PF03663.13^Glyco_hydro_76^Glycosyl hydrolase family 76^234-390^E:9.2e-19	.	.	.	.
CBM1; CBM13; CBM2; GH74	#N/A	#N/A	LE01Gene07273	7.74333	7.56057	6.87604	12.6528	10.0285	8.27437	3.91203	0.000437097	0.00120949	LE01Gene07273	XG74_HYPJQ^XG74_HYPJQ^Q:329-2815,H:5-838^56.3%ID^E:2.7e-241^RecName: Full=Xyloglucanase {ECO:0000303|PubMed:15541296}	.	.	.	.	.
GH12	Cellulase	Endo-beta-1,4-glucanase	LE01Gene04541	6.79166	6.43075	7.09347	12.0799	8.44372	7.97997	3.89731	0.000992876	0.00254946	LE01Gene04541	XGEA_ASPAC^XGEA_ASPAC^Q:436-1227,H:3-237^40.1%ID^E:5.8e-42^RecName: Full=Xyloglucan-specific endo-beta-1,4-glucanase A	PF01670.15^Glyco_hydro_12^Glycosyl hydrolase family 12^36-265^E:7.4e-33	.	.	.	GO:0008810^molecular_function^cellulase activity`GO:0000272^biological_process^polysaccharide catabolic process
CBM20; GH15	#N/A	#N/A	LE01Gene04190	10.7977	10.2489	10.2848	14.9902	13.7278	13.9916	3.87887	2.69e-17	9.74e-16	LE01Gene04190	AMYG_SCHCM^AMYG_SCHCM^Q:43-1725,H:18-576^62.7%ID^E:3.4e-199^RecName: Full=Glucoamylase ARB_02327-1 {ECO:0000305}	PF00723.20^Glyco_hydro_15^Glycosyl hydrolases family 15^34-447^E:1.5e-93`PF00686.18^CBM_20^Starch binding domain^481-569^E:1.6e-27	COG3387^glycoside hydrolase 15-related	KEGG:scm:SCHCODRAFT_57589`KO:K01178	GO:0005576^cellular_component^extracellular region`GO:0004339^molecular_function^glucan 1,4-alpha-glucosidase activity`GO:2001070^molecular_function^starch binding`GO:0000272^biological_process^polysaccharide catabolic process	GO:2001070^molecular_function^starch binding
GH16	#N/A	#N/A	LE01Gene05084	4.60866	6.00523	5.79678	9.664	9.17437	9.23602	3.81664	1.95e-08	1.34e-07	LE01Gene05084	YHZ7_SCHPO^YHZ7_SCHPO^Q:319-1197,H:128-417^39.7%ID^E:1e-60^RecName: Full=Probable glycosidase C21B10.07	.	.	.	.	.
CBM1; CE1	Hemicellulase	acetylxylan esterase	LE01Gene12496	7.39559	7.39799	7.12202	12.5177	8.98806	7.96355	3.80548	0.000682373	0.00181268	LE01Gene12496	AXE1_NEOFI^AXE1_NEOFI^Q:623-1729,H:4-368^52.8%ID^E:3.4e-88^RecName: Full=Probable acetylxylan esterase A	.	.	.	.	.
AA3	Lignin Degrading Auxiliary enzyme	aryl-alcohol oxidase	LE01Gene04836	7.0486	6.72013	7.79502	11.0657	10.3088	11.3222	3.70705	5.8e-27	8.58e-25	LE01Gene04836	PDH1_AGABI^PDH1_AGABI^Q:934-2631,H:76-594^36%ID^E:1.5e-87^RecName: Full=Pyranose dehydrogenase {ECO:0000303|PubMed:11086703}	PF00732.18^GMC_oxred_N^GMC oxidoreductase^135-263^E:6.1e-24`PF05199.12^GMC_oxred_C^GMC oxidoreductase^363-504^E:2.3e-37	.	.	GO:0005576^cellular_component^extracellular region`GO:0050660^molecular_function^flavin adenine dinucleotide binding`GO:0033718^molecular_function^pyranose dehydrogenase (acceptor) activity`GO:0005975^biological_process^carbohydrate metabolic process	GO:0016614^molecular_function^oxidoreductase activity, acting on CH-OH group of donors`GO:0050660^molecular_function^flavin adenine dinucleotide binding`GO:0055114^biological_process^oxidation-reduction process
CBM20; GH15	#N/A	#N/A	LE01Gene04186	8.21901	8.50061	8.42632	12.7814	11.1951	11.8487	3.70648	4.27e-07	2.23e-06	LE01Gene04186	AMYG_SCHCM^AMYG_SCHCM^Q:909-2588,H:20-576^62.4%ID^E:4.7e-198^RecName: Full=Glucoamylase ARB_02327-1 {ECO:0000305}	.	.	.	.	.
CBM20; CBM25; GH13	#N/A	#N/A	LE01Gene09188	8.55213	8.55307	8.83553	12.9084	11.9496	11.9249	3.688	6.48e-23	6.01e-21	LE01Gene09188	AMY_STRLM^AMY_STRLM^Q:429-2096,H:29-565^45.6%ID^E:1.1e-129^RecName: Full=Alpha-amylase	.	.	.	.	.
AA3	Lignin Degrading Auxiliary enzyme	glucose oxidase	LE01Gene07621	11.7454	10.9908	13.0193	16.3003	14.614	15.8401	3.57818	4.66e-05	0.000158907	LE01Gene07621	GOX_ASPNG^GOX_ASPNG^Q:307-2097,H:26-603^30.3%ID^E:1.4e-43^RecName: Full=Glucose oxidase	PF00732.18^GMC_oxred_N^GMC oxidoreductase^38-357^E:6.7e-45`PF05199.12^GMC_oxred_C^GMC oxidoreductase^466-607^E:5.5e-24	.	KEGG:ani:AN7998.2	GO:0050660^molecular_function^flavin adenine dinucleotide binding`GO:0016614^molecular_function^oxidoreductase activity, acting on CH-OH group of donors`GO:1900793^biological_process^shamixanthone biosynthetic process	GO:0016614^molecular_function^oxidoreductase activity, acting on CH-OH group of donors`GO:0050660^molecular_function^flavin adenine dinucleotide binding`GO:0055114^biological_process^oxidation-reduction process
CBM67	#N/A	#N/A	LE01Gene08448	10.7028	10.6525	12.3339	14.4723	15.3347	15.0448	3.53598	3.35e-16	1.01e-14	LE01Gene08448	.	.	.	.	.	.
CE3	#N/A	#N/A	LE01Gene01029	8.01331	7.68669	8.0785	12.4638	10.4985	10.2153	3.50047	6.76e-05	0.000221486	LE01Gene01029	CESA_RUMFL^CESA_RUMFL^Q:762-1313,H:40-250^25.2%ID^E:6.5e-05^RecName: Full=Multidomain esterase {ECO:0000303|PubMed:10846217}	.	.	.	.	.
AA3	Lignin Degrading Auxiliary enzyme	aryl-alcohol oxidase	LE01Gene04820	9.8759	10.1635	10.8889	13.9576	13.6283	13.8904	3.4587	1.13e-31	3.01e-29	LE01Gene04820	DTXS3_METRA^DTXS3_METRA^Q:2343-3371,H:20-369^54.3%ID^E:5.9e-102^RecName: Full=Aldo-keto reductase dtxS3 {ECO:0000305}	PF00732.18^GMC_oxred_N^GMC oxidoreductase^43-356^E:1.3e-55`PF05199.12^GMC_oxred_C^GMC oxidoreductase^464-604^E:4.4e-29`PF00248.20^Aldo_ket_red^Aldo/keto reductase family^642-952^E:7.4e-68	.	KEGG:maj:MAA_10045	GO:0016491^molecular_function^oxidoreductase activity	GO:0016614^molecular_function^oxidoreductase activity, acting on CH-OH group of donors`GO:0050660^molecular_function^flavin adenine dinucleotide binding`GO:0055114^biological_process^oxidation-reduction process
GH18	#N/A	#N/A	LE01Gene10302	7.76737	7.52349	8.51869	11.6914	11.4651	11.1154	3.4469	6.75e-09	5.14e-08	LE01Gene10302	CHI2_RHIOL^CHI2_RHIOL^Q:842-1675,H:58-304^46.8%ID^E:4.1e-62^RecName: Full=Chitinase 2	.	.	.	.	.
CBM1; GH10	Hemicellulase	Endo-1,4-beta-xylanase	LE01Gene03223	8.66838	7.77768	7.93569	12.8526	10.3414	9.47877	3.43728	0.000473049	0.00130036	LE01Gene03223	XYNC_PHACH^XYNC_PHACH^Q:360-1553,H:1-399^71.4%ID^E:1.2e-156^RecName: Full=Endo-1,4-beta-xylanase C	.	.	.	.	.
CE16	#N/A	#N/A	LE01Gene11041	6.65663	7.4777	7.15002	11.7362	9.07801	8.09501	3.33594	0.00283273	0.00658529	LE01Gene11041	AES1_THIHE^AES1_THIHE^Q:871-1365,H:6-178^44.3%ID^E:8.9e-36^RecName: Full=Acetylesterase {ECO:0000303|PubMed:24140638}	.	.	.	.	.
AA7	#N/A	#N/A	LE01Gene10788	7.03876	7.23322	8.33171	10.178	11.2508	11.2675	3.33292	4.31e-17	1.51e-15	LE01Gene10788	CHG5_CHAGB^CHG5_CHAGB^Q:740-2227,H:63-560^32.3%ID^E:1.5e-65^RecName: Full=FAD-linked oxidoreductase CHGG_01242-2 {ECO:0000303|PubMed:23611317}	.	.	.	.	.
CE16	#N/A	#N/A	LE01Gene12173	8.01331	7.50839	6.78375	11.7877	9.97465	9.70801	3.29495	0.000744976	0.0019616	LE01Gene12173	AES1_HYPJE^AES1_HYPJE^Q:885-1808,H:1-344^30.5%ID^E:1.1e-30^RecName: Full=Acetylesterase {ECO:0000303|Ref.2}	PF00657.21^Lipase_GDSL^GDSL-like Lipase/Acylhydrolase^31-296^E:6.9e-13	ENOG4111JEM^carbohydrate esterase family 16 protein	.	GO:0005576^cellular_component^extracellular region`GO:0008126^molecular_function^acetylesterase activity	GO:0016788^molecular_function^hydrolase activity, acting on ester bonds
CBM12; CBM5	#N/A	#N/A	LE01Gene10124	5.52341	5.52448	6.38882	9.5982	8.78632	8.86958	3.28215	0.00305151	0.00701992	LE01Gene10124	.	.	.	.	.	.
GH16	#N/A	#N/A	LE01Gene05083	8.71237	8.82098	9.67924	12.7342	12.3098	11.8964	3.21685	9.03e-11	9.83e-10	LE01Gene05083	YHZ7_SCHPO^YHZ7_SCHPO^Q:102-995,H:126-417^44.7%ID^E:5.8e-63^RecName: Full=Probable glycosidase C21B10.07	PF00722.20^Glyco_hydro_16^Glycosyl hydrolases family 16^75-172^E:4.5e-07	.	KEGG:ang:ANI_1_2196024	GO:0031225^cellular_component^anchored component of membrane`GO:0005886^cellular_component^plasma membrane`GO:0052861^molecular_function^glucan endo-1,3-beta-glucanase activity, C-3 substituted reducing group`GO:0052862^molecular_function^glucan endo-1,4-beta-glucanase activity, C-3 substituted reducing group`GO:0030245^biological_process^cellulose catabolic process	GO:0004553^molecular_function^hydrolase activity, hydrolyzing O-glycosyl compounds`GO:0005975^biological_process^carbohydrate metabolic process
GH28	#N/A	#N/A	LE01Gene06973	7.73726	8.39781	7.79502	11.5151	9.4123	11.7485	3.19432	0.000952736	0.00245611	LE01Gene06973	PGLRA_ASPKW^PGLRA_ASPKW^Q:60-1187,H:10-367^36.3%ID^E:3.1e-46^RecName: Full=Probable endopolygalacturonase A	PF00295.16^Glyco_hydro_28^Glycosyl hydrolases family 28^73-383^E:2.9e-60	.	.	GO:0005576^cellular_component^extracellular region`GO:0004650^molecular_function^polygalacturonase activity`GO:0005975^biological_process^carbohydrate metabolic process`GO:0071555^biological_process^cell wall organization	GO:0004650^molecular_function^polygalacturonase activity`GO:0005975^biological_process^carbohydrate metabolic process
CBM12	#N/A	#N/A	LE01Gene01726	13.1389	12.6803	13.8257	16.7337	15.9645	16.5351	3.15379	9.96e-14	1.93e-12	LE01Gene01726	DEAA_VIBAL^DEAA_VIBAL^Q:324-536,H:305-375^36.6%ID^E:9.6e-06^RecName: Full=Chitin disaccharide deacetylase	.	.	.	.	.
GH76	#N/A	#N/A	LE01Gene10232	7.83716	7.1383	8.34792	11.7248	9.93255	10.7933	3.14683	4.53e-09	3.6e-08	LE01Gene10232	.	.	.	.	.	.
GH16_10	#N/A	#N/A	LE01Gene11778	8.27457	7.52349	7.84726	11.9355	10.427	10.0253	3.13468	1.01e-07	6.03e-07	LE01Gene11778	E3GAL_FLAVE^E3GAL_FLAVE^Q:590-952,H:129-249^73.6%ID^E:1.4e-49^RecName: Full=Galactan endo-beta-1,3-galactanase	.	.	.	.	.
GH5	Cellulase	Endo-beta-1,4-glucanase	LE01Gene08136	8.48849	7.44634	7.24826	12.1035	9.60616	9.55016	3.11797	0.000531781	0.00144549	LE01Gene08136	GUN_ROBSP^GUN_ROBSP^Q:604-1719,H:6-377^62.1%ID^E:1.5e-133^RecName: Full=Endoglucanase 1	.	.	.	.	.
GH18	#N/A	#N/A	LE01Gene09723	7.47071	8.00452	7.75912	11.9121	9.43971	9.37704	3.00764	3.83e-07	2.03e-06	LE01Gene09723	CHI33_ARTBC^CHI33_ARTBC^Q:1119-1817,H:114-323^24.3%ID^E:6.7e-05^RecName: Full=Class III chitinase ARB_03514 {ECO:0000305}	.	.	.	.	.
GH18	#N/A	#N/A	LE01Gene10125	8.0627	6.52382	7.38804	11.0754	9.90894	9.84132	2.94456	0.00120524	0.00304066	LE01Gene10125	CHI1_APHAL^CHI1_APHAL^Q:254-1294,H:31-379^45.6%ID^E:7.3e-89^RecName: Full=Chitinase 1	PF00704.27^Glyco_hydro_18^Glycosyl hydrolases family 18^59-396^E:2.5e-72	.	.	GO:0005576^cellular_component^extracellular region`GO:0008061^molecular_function^chitin binding`GO:0004568^molecular_function^chitinase activity`GO:0006032^biological_process^chitin catabolic process`GO:0000272^biological_process^polysaccharide catabolic process	GO:0005975^biological_process^carbohydrate metabolic process
CE4	#N/A	#N/A	LE01Gene06517	8.20588	8.31777	8.05401	11.2118	10.6802	11.3614	2.92052	5e-15	1.2e-13	LE01Gene06517	PGDAE_HELPG^PGDAE_HELPG^Q:264-1118,H:2-285^60.7%ID^E:1.9e-104^RecName: Full=Peptidoglycan deacetylase	PF01522.20^Polysacc_deac_1^Polysaccharide deacetylase^43-147^E:1.3e-14	.	KEGG:hpg:HPG27_289`KO:K22278	GO:0046555^molecular_function^acetylxylan esterase activity`GO:0016810^molecular_function^hydrolase activity, acting on carbon-nitrogen (but not peptide) bonds`GO:0046872^molecular_function^metal ion binding`GO:0071555^biological_process^cell wall organization`GO:0045493^biological_process^xylan catabolic process	GO:0016810^molecular_function^hydrolase activity, acting on carbon-nitrogen (but not peptide) bonds`GO:0005975^biological_process^carbohydrate metabolic process
GT20	#N/A	#N/A	LE01Gene13404	12.532	12.1461	12.3288	15.5074	14.8509	15.1671	2.856	1.16e-09	1.02e-08	LE01Gene13404	TPS2_YEAST^TPS2_YEAST^Q:279-3200,H:26-848^32.7%ID^E:7.3e-129^RecName: Full=Trehalose-phosphatase	PF00982.20^Glyco_transf_20^Glycosyltransferase family 20^51-479^E:2e-123`PF00982.20^Glyco_transf_20^Glycosyltransferase family 20^592-646^E:5.8e-11`PF02358.15^Trehalose_PPase^Trehalose-phosphatase^711-930^E:6e-63	.	KEGG:sce:YDR074W`KO:K16055	GO:0005946^cellular_component^alpha,alpha-trehalose-phosphate synthase complex (UDP-forming)`GO:0004805^molecular_function^trehalose-phosphatase activity`GO:0034605^biological_process^cellular response to heat`GO:0005992^biological_process^trehalose biosynthetic process`GO:0070413^biological_process^trehalose metabolism in response to stress	GO:0003824^molecular_function^catalytic activity`GO:0005992^biological_process^trehalose biosynthetic process
GH152	#N/A	#N/A	LE01Gene02946	8.62957	8.33499	9.00861	12.2067	11.2558	10.7501	2.85243	3.24e-11	3.85e-10	LE01Gene02946	PR5_ARATH^PR5_ARATH^Q:644-1357,H:23-239^40.1%ID^E:2.9e-32^RecName: Full=Pathogenesis-related protein 5	.	.	.	.	.
GT8	#N/A	#N/A	LE01Gene07316	7.61013	6.89291	7.67812	10.4149	9.7207	10.5574	2.84652	1.06e-14	2.39e-13	LE01Gene07316	Y258_HAEIN^Y258_HAEIN^Q:917-1591,H:46-274^25.2%ID^E:1.4e-12^RecName: Full=Putative glycosyltransferase HI_0258	PF13578.5^Methyltransf_24^Methyltransferase domain^67-224^E:5.1e-14`PF01501.19^Glyco_transf_8^Glycosyl transferase family 8^300-532^E:3.1e-27	.	.	.	GO:0016757^molecular_function^transferase activity, transferring glycosyl groups
AA3	#N/A	#N/A	LE01Gene13764	7.21514	7.14808	8.37979	9.93773	10.9886	10.4544	2.82996	2.34e-14	4.97e-13	LE01Gene13764	BETA_PSE14^BETA_PSE14^Q:1352-3019,H:7-535^32.5%ID^E:5e-67^RecName: Full=Oxygen-dependent choline dehydrogenase {ECO:0000255|HAMAP-Rule:MF_00750}	.	.	.	.	.
GH20	#N/A	#N/A	LE01Gene10240	9.4198	8.77123	10.3646	12.5146	11.9459	12.7685	2.78252	1.67e-10	1.74e-09	LE01Gene10240	HEXO2_ARATH^HEXO2_ARATH^Q:285-1994,H:8-571^34.7%ID^E:1.7e-83^RecName: Full=Beta-hexosaminidase 2	.	.	.	.	.
PL1	Pectinase	pectate lyase	LE01Gene04946	10.7999	11.0765	10.2753	14.9464	11.4821	9.95367	2.774	0.0037949	0.00853852	LE01Gene04946	PLYA_ASPNG^PLYA_ASPNG^Q:871-1800,H:13-323^57.5%ID^E:8.6e-83^RecName: Full=Pectate lyase A	.	.	.	.	.
CBM51; GH35	#N/A	#N/A	LE01Gene05202	6.69473	7.53844	7.36434	10.1729	9.40835	10.1185	2.70522	9.46e-09	6.97e-08	LE01Gene05202	BGALA_NEOFI^BGALA_NEOFI^Q:1-3021,H:1-979^34.4%ID^E:2.6e-152^RecName: Full=Probable beta-galactosidase A	PF01301.18^Glyco_hydro_35^Glycosyl hydrolases family 35^43-368^E:3.8e-78`PF10435.8^BetaGal_dom2^Beta-galactosidase, domain 2^407-533^E:1.1e-30`PF13363.5^BetaGal_dom3^Beta-galactosidase, domain 3^574-660^E:4.9e-18`PF13364.5^BetaGal_dom4_5^Beta-galactosidase jelly roll domain^697-786^E:5.7e-13`PF13364.5^BetaGal_dom4_5^Beta-galactosidase jelly roll domain^885-995^E:4e-31	.	KEGG:nfi:NFIA_011250	GO:0005576^cellular_component^extracellular region`GO:0004565^molecular_function^beta-galactosidase activity`GO:0000272^biological_process^polysaccharide catabolic process	.
GH71	#N/A	#N/A	LE01Gene04265	7.2834	7.12846	7.88662	10.623	10.0717	9.51303	2.67482	1.86e-09	1.59e-08	LE01Gene04265	AGN1_SCHPO^AGN1_SCHPO^Q:354-1562,H:24-422^35.6%ID^E:7e-59^RecName: Full=Glucan endo-1,3-alpha-glucosidase agn1	.	.	.	.	.
GH43_24	#N/A	#N/A	LE01Gene10175	9.06728	8.7932	8.8555	12.4274	10.8749	10.3254	2.589	1.54e-06	7.12e-06	LE01Gene10175	.	PF04616.13^Glyco_hydro_43^Glycosyl hydrolases family 43^101-296^E:8.8e-10	.	.	.	GO:0004553^molecular_function^hydrolase activity, hydrolyzing O-glycosyl compounds`GO:0005975^biological_process^carbohydrate metabolic process
GH18	#N/A	#N/A	LE01Gene09736	9.14501	8.7457	9.93395	11.5237	12.1687	11.905	2.5298	1.59e-08	1.11e-07	LE01Gene09736	.	PF00704.27^Glyco_hydro_18^Glycosyl hydrolases family 18^174-412^E:2.1e-13	.	.	.	GO:0005975^biological_process^carbohydrate metabolic process
CBM35; GH43_24	#N/A	#N/A	LE01Gene00068	9.45538	9.52324	9.37565	12.7873	11.1323	11.3852	2.51337	2.24e-06	1e-05	LE01Gene00068	.	PF04616.13^Glyco_hydro_43^Glycosyl hydrolases family 43^60-244^E:2.3e-19	.	.	.	GO:0004553^molecular_function^hydrolase activity, hydrolyzing O-glycosyl compounds`GO:0005975^biological_process^carbohydrate metabolic process
GH53	#N/A	#N/A	LE01Gene05074	7.09682	6.46245	5.62123	9.63617	8.38048	8.26546	2.40149	8.86e-05	0.000283095	LE01Gene05074	GANA_EMENI^GANA_EMENI^Q:374-1120,H:102-347^43.1%ID^E:9.8e-50^RecName: Full=Arabinogalactan endo-beta-1,4-galactanase A	PF07745.12^Glyco_hydro_53^Glycosyl hydrolase family 53^1-121^E:1.7e-24	.	KEGG:ani:AN5727.2`KO:K01224	GO:0005576^cellular_component^extracellular region`GO:0031218^molecular_function^arabinogalactan endo-1,4-beta-galactosidase activity`GO:0015926^molecular_function^glucosidase activity`GO:0071555^biological_process^cell wall organization`GO:0045490^biological_process^pectin catabolic process	GO:0015926^molecular_function^glucosidase activity
CE12	#N/A	#N/A	LE01Gene06888	9.01804	8.45801	8.16336	11.7881	10.1847	9.80029	2.27616	0.0039832	0.00892099	LE01Gene06888	RHA1_ASPAC^RHA1_ASPAC^Q:618-1334,H:7-242^49.6%ID^E:1.2e-56^RecName: Full=Rhamnogalacturonan acetylesterase	PF13472.5^Lipase_GDSL_2^GDSL-like Lipase/Acylhydrolase family^24-222^E:9.3e-10	.	KEGG:ag:CAA61858`KO:K15530	GO:0016787^molecular_function^hydrolase activity	.
PL4	#N/A	#N/A	LE01Gene10811	9.39109	9.55667	10.2817	12.5141	11.6181	11.9323	2.27417	1.26e-14	2.81e-13	LE01Gene10811	RGLB_ASPFN^RGLB_ASPFN^Q:495-2417,H:14-662^43.1%ID^E:2.1e-144^RecName: Full=Probable rhamnogalacturonate lyase B	.	.	.	.	.
GH53	#N/A	#N/A	LE01Gene05090	9.11254	8.75212	9.01624	11.6832	10.5335	11.1736	2.23871	7.59e-05	0.000246066	LE01Gene05090	GANA_EMENI^GANA_EMENI^Q:635-1579,H:7-322^47.2%ID^E:2.5e-75^RecName: Full=Arabinogalactan endo-beta-1,4-galactanase A	.	.	.	.	.
AA6	Lignin Degrading Auxiliary enzyme	Benzoquinone reductase	LE01Gene05328	9.22746	8.89833	9.32129	11.4083	10.9026	11.7485	2.23572	3.09e-05	0.000109609	LE01Gene05328	PST2_YEAST^PST2_YEAST^Q:126-716,H:2-197^62.9%ID^E:1.4e-70^RecName: Full=Protoplast secreted protein 2	PF03358.14^FMN_red^NADPH-dependent FMN reductase^56-183^E:1.4e-09`PF02525.16^Flavodoxin_2^Flavodoxin-like fold^56-173^E:8.7e-07	.	KEGG:sce:YDR032C	GO:0005576^cellular_component^extracellular region`GO:0010181^molecular_function^FMN binding`GO:0042802^molecular_function^identical protein binding`GO:0003955^molecular_function^NAD(P)H dehydrogenase (quinone) activity	GO:0016491^molecular_function^oxidoreductase activity
GH13; GH152	#N/A	#N/A	LE01Gene12203	5.13735	4.64107	5.6991	6.90509	5.94636	8.33094	2.19732	0.0023273	0.00550556	LE01Gene12203	AMYB_ASPAW^AMYB_ASPAW^Q:1205-2719,H:3-498^44.5%ID^E:1.3e-116^RecName: Full=Alpha-amylase B	.	.	.	.	.
GH78	#N/A	#N/A	LE01Gene11720	7.94646	7.85732	8.62558	10.6567	9.77088	10.4515	2.15773	2.25e-10	2.29e-09	LE01Gene11720	.	PF17389.1^Bac_rhamnosid6H^Bacterial alpha-L-rhamnosidase 6 hairpin glycosidase domain^248-468^E:4.5e-17`PF01204.17^Trehalase^Trehalase^382-460^E:3.5e-07	.	.	.	GO:0004555^molecular_function^alpha,alpha-trehalase activity`GO:0005991^biological_process^trehalose metabolic process
GH16_1	#N/A	#N/A	LE01Gene11400	8.25346	8.89543	9.05377	11.1527	10.4985	11.0027	2.13979	3.59e-07	1.91e-06	LE01Gene11400	YHZ7_SCHPO^YHZ7_SCHPO^Q:183-1094,H:126-417^33.4%ID^E:3.5e-42^RecName: Full=Probable glycosidase C21B10.07	.	.	KEGG:spo:SPBC21B10.07	GO:0009277^cellular_component^fungal-type cell wall`GO:0016021^cellular_component^integral component of membrane`GO:0004553^molecular_function^hydrolase activity, hydrolyzing O-glycosyl compounds`GO:0071966^biological_process^fungal-type cell wall polysaccharide metabolic process	.
CBM51; GH35	#N/A	#N/A	LE01Gene04812	10.838	10.768	11.1358	13.5875	12.3133	12.8947	2.10314	1.32e-07	7.65e-07	LE01Gene04812	BGALB_ASPNC^BGALB_ASPNC^Q:1131-4082,H:42-1012^36.4%ID^E:5.1e-164^RecName: Full=Probable beta-galactosidase B	.	.	.	.	.
CBM67	#N/A	#N/A	LE01Gene11861	14.7801	14.1924	16.0141	16.8039	17.5312	17.3731	2.06688	2.97e-06	1.29e-05	LE01Gene11861	.	.	.	.	.	.
GH27	#N/A	#N/A	LE01Gene05323	12.2838	12.2922	12.8718	15.0807	13.9304	14.4641	2.05828	2.64e-06	1.16e-05	LE01Gene05323	AGAL3_HYPJE^AGAL3_HYPJE^Q:49-1383,H:167-618^49.2%ID^E:1.2e-117^RecName: Full=Alpha-galactosidase 3	PF16499.4^Melibiase_2^Alpha galactosidase A^36-124^E:1.3e-08`PF16499.4^Melibiase_2^Alpha galactosidase A^151-352^E:1.8e-08	ENOG410Y110^glycoside hydrolase family 27	.	GO:0005576^cellular_component^extracellular region`GO:0004557^molecular_function^alpha-galactosidase activity`GO:0052692^molecular_function^raffinose alpha-galactosidase activity`GO:0005975^biological_process^carbohydrate metabolic process	GO:0004553^molecular_function^hydrolase activity, hydrolyzing O-glycosyl compounds`GO:0005975^biological_process^carbohydrate metabolic process
GH51	#N/A	#N/A	LE01Gene09692	8.48124	7.82721	8.48245	10.8049	9.45897	10.4486	2.04912	0.000102814	0.000323814	LE01Gene09692	ABFA_ASPTN^ABFA_ASPTN^Q:362-2269,H:14-626^36.8%ID^E:9.8e-109^RecName: Full=Probable alpha-L-arabinofuranosidase A	.	.	.	.	.
CE1	#N/A	#N/A	LE01Gene00476	10.5079	10.7196	11.415	13.1227	12.8073	12.9744	2.03947	1.64e-19	8.65e-18	LE01Gene00476	ESTD_PIG^ESTD_PIG^Q:47-907,H:3-282^49.1%ID^E:1.3e-69^RecName: Full=S-formylglutathione hydrolase	PF00756.19^Esterase^Putative esterase^33-284^E:2.4e-41	COG0627^esterase	KEGG:ssc:397127`KO:K01070	GO:0031410^cellular_component^cytoplasmic vesicle`GO:0052689^molecular_function^carboxylic ester hydrolase activity`GO:0042802^molecular_function^identical protein binding`GO:0018738^molecular_function^S-formylglutathione hydrolase activity`GO:0046294^biological_process^formaldehyde catabolic process	.
GH71	#N/A	#N/A	LE01Gene06228	7.26663	6.29652	7.48648	9.83699	8.56244	8.53366	2.02062	6.61e-06	2.68e-05	LE01Gene06228	MU71A_PENRW^MU71A_PENRW^Q:964-2274,H:28-433^41.8%ID^E:5e-82^RecName: Full=Mutanase Pc12g07500 {ECO:0000303|PubMed:24884713}	PF03659.13^Glyco_hydro_71^Glycosyl hydrolase family 71^50-447^E:2.5e-120	ENOG4111H6V^hydrolase family 71 protein	KEGG:pcs:Pc12g07500`KO:K08254	GO:0005576^cellular_component^extracellular region`GO:0051118^molecular_function^glucan endo-1,3-alpha-glucosidase activity`GO:0008152^biological_process^metabolic process	GO:0016787^molecular_function^hydrolase activity
GH92	#N/A	#N/A	LE01Gene04001	8.69368	8.68989	9.98666	11.3484	10.3803	11.7473	2.00399	0.000494904	0.00135375	LE01Gene04001	A7629_ARTBC^A7629_ARTBC^Q:873-3197,H:29-761^31.8%ID^E:5.7e-102^RecName: Full=Uncharacterized secreted glycosidase ARB_07629 {ECO:0000305}	PF07971.11^Glyco_hydro_92^Glycosyl hydrolase family 92^283-796^E:4.2e-127	COG3537^Alpha-1,2-mannosidase	KEGG:abe:ARB_07629	GO:0005576^cellular_component^extracellular region`GO:0030246^molecular_function^carbohydrate binding`GO:0016798^molecular_function^hydrolase activity, acting on glycosyl bonds`GO:0008152^biological_process^metabolic process	.
GT20	#N/A	#N/A	LE01Gene12625	11.972	11.7245	12.8196	14.3049	13.9611	14.4128	1.98731	0.000218285	0.000639752	LE01Gene12625	TPS1_EMENI^TPS1_EMENI^Q:353-1888,H:2-484^63.5%ID^E:1.4e-195^RecName: Full=Alpha,alpha-trehalose-phosphate synthase [UDP-forming]	PF00982.20^Glyco_transf_20^Glycosyltransferase family 20^22-178^E:4.9e-44`PF00982.20^Glyco_transf_20^Glycosyltransferase family 20^200-513^E:9.9e-140	.	KEGG:ani:AN5523.2`KO:K00697	GO:0005946^cellular_component^alpha,alpha-trehalose-phosphate synthase complex (UDP-forming)`GO:0005737^cellular_component^cytoplasm`GO:0003825^molecular_function^alpha,alpha-trehalose-phosphate synthase (UDP-forming) activity`GO:0016791^molecular_function^phosphatase activity`GO:0030437^biological_process^ascospore formation`GO:0044262^biological_process^cellular carbohydrate metabolic process`G…	GO:0003824^molecular_function^catalytic activity`GO:0005992^biological_process^trehalose biosynthetic process
GH79	#N/A	#N/A	LE01Gene09636	9.665	9.51004	10.2732	11.9008	11.5922	11.8924	1.94808	4.41e-10	4.18e-09	LE01Gene09636	GUS79_ASPNC^GUS79_ASPNC^Q:1289-1939,H:317-540^30.6%ID^E:8e-17^RecName: Full=Beta-glucuronidase {ECO:0000303|PubMed:18377882}	.	.	.	.	.
GT1	#N/A	#N/A	LE01Gene13736	8.54172	8.47753	8.91654	10.4706	11.066	10.0973	1.94465	3.27e-06	1.41e-05	LE01Gene13736	UFOG1_FRAAN^UFOG1_FRAAN^Q:772-1242,H:235-392^37.6%ID^E:8.2e-17^RecName: Full=Anthocyanidin 3-O-glucosyltransferase 1	PF00201.17^UDPGT^UDP-glucoronosyl and UDP-glucosyl transferase^297-426^E:4.1e-19	COG1819^Transferase	KEGG:ath:AT1G22340	GO:0043231^cellular_component^intracellular membrane-bounded organelle`GO:0015020^molecular_function^glucuronosyltransferase activity`GO:0080043^molecular_function^quercetin 3-O-glucosyltransferase activity`GO:0080044^molecular_function^quercetin 7-O-glucosyltransferase activity`GO:0008152^biological_process^metabolic process	GO:0016758^molecular_function^transferase activity, transferring hexosyl groups
GH16	#N/A	#N/A	LE01Gene07068	9.808	9.63002	9.64194	11.1928	12.0973	11.4357	1.93331	4.61e-05	0.000157466	LE01Gene07068	YHZ7_SCHPO^YHZ7_SCHPO^Q:346-1248,H:126-417^36.4%ID^E:1.7e-48^RecName: Full=Probable glycosidase C21B10.07	.	.	KEGG:ang:ANI_1_2196024	GO:0031225^cellular_component^anchored component of membrane`GO:0005886^cellular_component^plasma membrane`GO:0052861^molecular_function^glucan endo-1,3-beta-glucanase activity, C-3 substituted reducing group`GO:0052862^molecular_function^glucan endo-1,4-beta-glucanase activity, C-3 substituted reducing group`GO:0030245^biological_process^cellulose catabolic process	.
GH43	#N/A	#N/A	LE01Gene11715	9.8992	9.75525	10.1676	11.9596	11.6091	11.9498	1.89846	7.26e-23	6.68e-21	LE01Gene11715	ABNC_ASPNC^ABNC_ASPNC^Q:512-784,H:30-121^37.9%ID^E:0.00064^RecName: Full=Probable arabinan endo-1,5-alpha-L-arabinosidase C	PF04616.13^Glyco_hydro_43^Glycosyl hydrolases family 43^14-109^E:2.2e-07	.	.	.	GO:0004553^molecular_function^hydrolase activity, hydrolyzing O-glycosyl compounds`GO:0005975^biological_process^carbohydrate metabolic process
GH28	#N/A	#N/A	LE01Gene02734	8.03327	7.76503	7.51546	10.7012	8.83136	8.30511	1.88353	0.0010701	0.00272976	LE01Gene02734	RHGA_ASPAC^RHGA_ASPAC^Q:719-1714,H:41-370^30.2%ID^E:1.5e-30^RecName: Full=Rhamnogalacturonase A	.	.	.	.	.
GH18	#N/A	#N/A	LE01Gene11646	10.916	10.2306	10.9272	12.8567	12.355	12.5569	1.87904	1.2e-08	8.65e-08	LE01Gene11646	LACP_KLULA^LACP_KLULA^Q:210-1679,H:65-551^31.9%ID^E:9.4e-67^RecName: Full=Lactose permease	.	.	.	.	.
GH128	#N/A	#N/A	LE01Gene02985	8.7247	9.90405	9.50593	10.6135	12.1454	10.5899	1.85882	0.000532365	0.00144674	LE01Gene02985	ASL1_SCHPO^ASL1_SCHPO^Q:195-884,H:296-529^35.1%ID^E:1.3e-25^RecName: Full=Alkali-sensitive linkage protein 1	PF11790.7^Glyco_hydro_cc^Glycosyl hydrolase catalytic core^67-293^E:3.4e-65	.	.	.	.
CBM1; CE15	#N/A	#N/A	LE01Gene11487	8.77891	8.97174	9.21707	11.1991	10.3267	10.8525	1.83769	1.19e-05	4.6e-05	LE01Gene11487	GCE1_PHACR^GCE1_PHACR^Q:329-1732,H:1-472^66.7%ID^E:1e-169^RecName: Full=4-O-methyl-glucuronoyl methylesterase 1 {ECO:0000305}	PF00734.17^CBM_1^Fungal cellulose binding domain^24-52^E:2e-11	.	.	GO:0005576^cellular_component^extracellular region`GO:0052689^molecular_function^carboxylic ester hydrolase activity`GO:0030248^molecular_function^cellulose binding`GO:0005975^biological_process^carbohydrate metabolic process`GO:0046274^biological_process^lignin catabolic process	GO:0030248^molecular_function^cellulose binding`GO:0005975^biological_process^carbohydrate metabolic process`GO:0005576^cellular_component^extracellular region
CBM1; GH10	Hemicellulase	Endo-1,4-beta-xylanase	LE01Gene02639	8.79068	8.55307	8.78584	10.7694	10.1472	10.645	1.8329	3.12e-06	1.35e-05	LE01Gene02639	XYNA_PHACH^XYNA_PHACH^Q:177-1091,H:95-400^63.8%ID^E:5.4e-116^RecName: Full=Endo-1,4-beta-xylanase A	PF00331.19^Glyco_hydro_10^Glycosyl hydrolase family 10^45-347^E:1.6e-96	COG3693^hydrolase family 10	.	GO:0005576^cellular_component^extracellular region`GO:0030248^molecular_function^cellulose binding`GO:0031176^molecular_function^endo-1,4-beta-xylanase activity`GO:0045493^biological_process^xylan catabolic process	GO:0004553^molecular_function^hydrolase activity, hydrolyzing O-glycosyl compounds`GO:0005975^biological_process^carbohydrate metabolic process
GH43	#N/A	#N/A	LE01Gene06082	8.66838	8.97174	7.85861	11.2588	9.89628	9.33935	1.83067	0.000707552	0.00187446	LE01Gene06082	ABNA_ASPNC^ABNA_ASPNC^Q:166-1080,H:5-320^42.4%ID^E:7.4e-58^RecName: Full=Probable arabinan endo-1,5-alpha-L-arabinosidase A	PF04616.13^Glyco_hydro_43^Glycosyl hydrolases family 43^82-358^E:1.9e-41	.	KEGG:ang:ANI_1_118084`KO:K06113	GO:0005576^cellular_component^extracellular region`GO:0046558^molecular_function^arabinan endo-1,5-alpha-L-arabinosidase activity`GO:0031222^biological_process^arabinan catabolic process`GO:2000895^biological_process^hemicellulose catabolic process`GO:0045493^biological_process^xylan catabolic process	GO:0004553^molecular_function^hydrolase activity, hydrolyzing O-glycosyl compounds`GO:0005975^biological_process^carbohydrate metabolic process
GH16	#N/A	#N/A	LE01Gene09459	7.11567	6.75894	6.55159	8.78211	8.39255	8.64083	1.79505	3.16e-05	0.000111889	LE01Gene09459	GUB_PAEPO^GUB_PAEPO^Q:889-1413,H:60-209^22.8%ID^E:2.7e-05^RecName: Full=Beta-glucanase	.	.	.	.	.
GH31	#N/A	#N/A	LE01Gene02438	11.0414	10.3306	10.8034	13.0219	11.9756	12.4512	1.79242	0.000104883	0.000329268	LE01Gene02438	XYLS_ECOLI^XYLS_ECOLI^Q:64-2370,H:1-729^46%ID^E:3.1e-206^RecName: Full=Alpha-xylosidase	PF13802.5^Gal_mutarotas_2^Galactose mutarotase-like^187-245^E:1.9e-16`PF01055.25^Glyco_hydro_31^Glycosyl hydrolases family 31^267-699^E:2e-119	COG1501^hydrolase, family 31	KEGG:ecj:JW3631`KEGG:eco:b3656`KO:K01811	GO:0061634^molecular_function^alpha-D-xyloside xylohydrolase`GO:0030246^molecular_function^carbohydrate binding`GO:0042802^molecular_function^identical protein binding`GO:0080176^molecular_function^xyloglucan 1,6-alpha-xylosidase activity`GO:0005975^biological_process^carbohydrate metabolic process	GO:0004553^molecular_function^hydrolase activity, hydrolyzing O-glycosyl compounds`GO:0005975^biological_process^carbohydrate metabolic process
GH17	#N/A	#N/A	LE01Gene05973	8.26616	8.00452	9.42231	10.8724	9.7923	10.5854	1.78304	5.57e-05	0.000186729	LE01Gene05973	.	.	.	.	.	.
GH30_3	#N/A	#N/A	LE01Gene06426	10.3166	10.452	10.4877	12.2856	12.2336	11.9899	1.75548	5.36e-11	6.06e-10	LE01Gene06426	NEG1_NEUCR^NEG1_NEUCR^Q:483-1625,H:46-416^33.5%ID^E:3.5e-39^RecName: Full=Endo-1,6-beta-D-glucanase	PF02055.15^Glyco_hydro_30^Glycosyl hydrolase family 30 TIM-barrel domain^68-365^E:1.5e-27`PF02057.14^Glyco_hydro_59^Glycosyl hydrolase family 59^96-331^E:2e-06	.	.	GO:0005576^cellular_component^extracellular region`GO:0005615^cellular_component^extracellular space`GO:0046557^molecular_function^glucan endo-1,6-beta-glucosidase activity`GO:0004348^molecular_function^glucosylceramidase activity`GO:0016798^molecular_function^hydrolase activity, acting on glycosyl bonds`GO:0005976^biological_process^polysaccharide metabolic process`GO:0006665^biological_process^…	GO:0004336^molecular_function^galactosylceramidase activity`GO:0006683^biological_process^galactosylceramide catabolic process
GT1	#N/A	#N/A	LE01Gene13733	6.75607	7.4304	7.83581	9.09999	8.90623	9.35202	1.73041	5.2e-07	2.66e-06	LE01Gene13733	U72B3_ARATH^U72B3_ARATH^Q:1000-1743,H:205-439^27.6%ID^E:3.3e-14^RecName: Full=UDP-glycosyltransferase 72B3	PF00201.17^UDPGT^UDP-glucoronosyl and UDP-glucosyl transferase^310-436^E:2.5e-18	COG1819^Transferase	KEGG:ath:AT1G22370	GO:0043231^cellular_component^intracellular membrane-bounded organelle`GO:0015020^molecular_function^glucuronosyltransferase activity`GO:0080043^molecular_function^quercetin 3-O-glucosyltransferase activity`GO:0080044^molecular_function^quercetin 7-O-glucosyltransferase activity`GO:0008152^biological_process^metabolic process	GO:0016758^molecular_function^transferase activity, transferring hexosyl groups
CBM50	#N/A	#N/A	LE01Gene13151	4.43947	5.82191	4.39346	6.96599	6.16853	6.96382	1.73004	0.000234707	0.000684449	LE01Gene13151	.	PF01476.19^LysM^LysM domain^132-171^E:9.9e-08`PF01476.19^LysM^LysM domain^181-226^E:4.5e-07	.	.	.	.
GH106	#N/A	#N/A	LE01Gene12252	10.0217	9.50053	10.3304	12.019	11.0246	11.9214	1.72951	3.24e-05	0.000114509	LE01Gene12252	.	PF17132.3^Glyco_hydro_106^alpha-L-rhamnosidase^208-715^E:4e-24	.	.	.	.
GH76	#N/A	#N/A	LE01Gene07201	6.3091	5.86997	6.69784	8.29053	7.44012	8.24296	1.72087	0.00385413	0.0086518	LE01Gene07201	YHG7_SCHPO^YHG7_SCHPO^Q:484-1116,H:134-353^29%ID^E:4.3e-15^RecName: Full=Putative mannan endo-1,6-alpha-mannosidase C1198.07c	.	.	.	.	.
GH105	#N/A	#N/A	LE01Gene01413	6.94704	6.85758	7.89215	9.53328	8.30159	8.95513	1.70889	0.000139707	0.00042697	LE01Gene01413	URHG2_BACSU^URHG2_BACSU^Q:456-1487,H:41-367^31.1%ID^E:1.7e-43^RecName: Full=Unsaturated rhamnogalacturonyl hydrolase YteR	PF07470.12^Glyco_hydro_88^Glycosyl Hydrolase Family 88^49-392^E:2.1e-59	COG4225^Glycosyl Hydrolase Family 88	KEGG:atu:Atu3128	GO:0016787^molecular_function^hydrolase activity	.
GH93	#N/A	#N/A	LE01Gene03844	6.92585	6.00523	6.6594	9.05024	7.55197	7.70496	1.70084	0.00352725	0.00799478	LE01Gene03844	.	.	.	.	.	.
GH55	#N/A	#N/A	LE01Gene05622	9.21877	8.58221	8.95408	11.3084	9.97732	10.2382	1.68961	0.000333199	0.000942976	LE01Gene05622	EXG1_COCCA^EXG1_COCCA^Q:56-2344,H:15-781^41.6%ID^E:1.4e-159^RecName: Full=Glucan 1,3-beta-glucosidase	PF12708.6^Pectate_lyase_3^Pectate lyase superfamily protein^75-302^E:1.5e-85`PF12708.6^Pectate_lyase_3^Pectate lyase superfamily protein^431-543^E:1.4e-14	ENOG410XTFG^glycoside hydrolase family 55 protein	KEGG:abe:ARB_02077	GO:0005576^cellular_component^extracellular region`GO:0042973^molecular_function^glucan endo-1,3-beta-D-glucosidase activity`GO:0008152^biological_process^metabolic process	.
GH5	#N/A	#N/A	LE01Gene07930	11.5309	11.1348	11.2879	13.5986	12.5461	12.6275	1.68123	0.00159302	0.00389787	LE01Gene07930	XYL5_PHACH^XYL5_PHACH^Q:2368-3792,H:1-474^75.6%ID^E:2.2e-222^RecName: Full=Beta-xylosidase {ECO:0000303|PubMed:25300189}	.	.	.	.	.
AA7	#N/A	#N/A	LE01Gene00015	6.96794	6.88123	7.26543	8.29529	9.0978	8.6477	1.67765	0.000433023	0.00119936	LE01Gene00015	A2372_ARTBC^A2372_ARTBC^Q:326-1540,H:63-462^29.5%ID^E:3.7e-34^RecName: Full=Uncharacterized FAD-linked oxidoreductase ARB_02372 {ECO:0000305}	PF01565.22^FAD_binding_4^FAD binding domain^86-220^E:1.1e-20	COG0277^FAD linked oxidase domain protein	KEGG:abe:ARB_02372	GO:0005576^cellular_component^extracellular region`GO:0071949^molecular_function^FAD binding`GO:0016491^molecular_function^oxidoreductase activity	GO:0016491^molecular_function^oxidoreductase activity`GO:0050660^molecular_function^flavin adenine dinucleotide binding`GO:0055114^biological_process^oxidation-reduction process
AA5	Lignin Degrading Auxiliary enzyme	Glyoxal oxidase	LE01Gene02092	11.6701	11.4129	11.6815	13.2706	12.4235	13.7887	1.67173	0.00289067	0.00670265	LE01Gene02092	GLOX_PHACH^GLOX_PHACH^Q:491-2146,H:3-556^59.3%ID^E:3.9e-190^RecName: Full=Aldehyde oxidase GLOX {ECO:0000305}	PF07250.10^Glyoxal_oxid_N^Glyoxal oxidase N-terminus^233-445^E:2.9e-30`PF09118.10^DUF1929^Domain of unknown function (DUF1929)^609-708^E:1.5e-22	.	KEGG:ag:AAA33747`KO:K20929	GO:0005615^cellular_component^extracellular space`GO:0004031^molecular_function^aldehyde oxidase activity`GO:0102797^molecular_function^geranial:oxygen oxidoreductase activity`GO:0102798^molecular_function^heptaldehyde:oxygen oxidoreductase activity`GO:0050665^biological_process^hydrogen peroxide biosynthetic process	.
GH2	#N/A	#N/A	LE01Gene01448	8.53473	8.22842	8.98549	10.5232	10.0155	10.2188	1.65303	1.55e-11	1.95e-10	LE01Gene01448	MANBB_THIHE^MANBB_THIHE^Q:803-2902,H:171-853^39.9%ID^E:2.1e-143^RecName: Full=Beta-mannosidase B	.	.	.	.	.
GH79	#N/A	#N/A	LE01Gene06732	9.53803	8.97724	10.0199	11.428	10.69	11.3888	1.63407	1.16e-05	4.5e-05	LE01Gene06732	GUS79_ASPNC^GUS79_ASPNC^Q:195-1805,H:43-541^30.6%ID^E:1e-48^RecName: Full=Beta-glucuronidase {ECO:0000303|PubMed:18377882}	PF16862.4^Glyco_hydro_79C^Glycosyl hydrolase family 79 C-terminal beta domain^298-418^E:3.9e-22	.	.	.	.
GH17	#N/A	#N/A	LE01Gene01277	8.6197	8.26033	7.49378	10.0573	9.57649	9.79411	1.62922	0.00014755	0.000449338	LE01Gene01277	BTGC_ASPNC^BTGC_ASPNC^Q:514-1458,H:363-678^35.1%ID^E:6.2e-45^RecName: Full=Putative glucan endo-1,3-beta-glucosidase btgC	PF00332.17^Glyco_hydro_17^Glycosyl hydrolases family 17^370-450^E:1.2e-08	.	KEGG:ang:ANI_1_1742064	GO:0016021^cellular_component^integral component of membrane`GO:0005886^cellular_component^plasma membrane`GO:0042973^molecular_function^glucan endo-1,3-beta-D-glucosidase activity`GO:0071555^biological_process^cell wall organization`GO:0000272^biological_process^polysaccharide catabolic process	GO:0004553^molecular_function^hydrolase activity, hydrolyzing O-glycosyl compounds`GO:0005975^biological_process^carbohydrate metabolic process
GH27	#N/A	#N/A	LE01Gene06823	10.2154	10.0363	10.3119	12.3222	11.0168	11.8349	1.62834	0.000124963	0.00038527	LE01Gene06823	AGALD_ASPOR^AGALD_ASPOR^Q:110-1675,H:24-656^38.2%ID^E:3.3e-99^RecName: Full=Probable alpha-galactosidase D	PF16499.4^Melibiase_2^Alpha galactosidase A^34-316^E:1.3e-52	.	KEGG:ang:ANI_1_276124`KO:K07407	GO:0005576^cellular_component^extracellular region`GO:0052692^molecular_function^raffinose alpha-galactosidase activity`GO:0000272^biological_process^polysaccharide catabolic process	GO:0004553^molecular_function^hydrolase activity, hydrolyzing O-glycosyl compounds`GO:0005975^biological_process^carbohydrate metabolic process
CBM12; CBM5; GH18	#N/A	#N/A	LE01Gene08044	9.11956	8.70653	9.22805	11.0454	10.1329	10.5997	1.60704	0.00431939	0.00958951	LE01Gene08044	CHI1_RHIOL^CHI1_RHIOL^Q:198-1136,H:19-316^47.3%ID^E:8.2e-69^RecName: Full=Chitinase 1	.	.	.	.	.
GH28	#N/A	#N/A	LE01Gene12986	9.82814	8.90122	10.6647	11.675	11.4522	11.5496	1.59192	9.15e-05	0.000291404	LE01Gene12986	RGXB_ASPNC^RGXB_ASPNC^Q:396-1595,H:33-417^51%ID^E:7.6e-110^RecName: Full=Alpha-L-rhamnosidase rgxB	PF00295.16^Glyco_hydro_28^Glycosyl hydrolases family 28^95-406^E:1.5e-38	.	KEGG:ang:ANI_1_1122034	GO:0005576^cellular_component^extracellular region`GO:0030596^molecular_function^alpha-L-rhamnosidase activity`GO:0004650^molecular_function^polygalacturonase activity`GO:0071555^biological_process^cell wall organization`GO:0000272^biological_process^polysaccharide catabolic process	GO:0004650^molecular_function^polygalacturonase activity`GO:0005975^biological_process^carbohydrate metabolic process
AA7	#N/A	#N/A	LE01Gene06745	6.4933	6.14851	6.25772	8.41806	6.95647	7.93013	1.59133	0.00103209	0.00264319	LE01Gene06745	PATO_ASPCL^PATO_ASPCL^Q:1087-2694,H:29-565^42%ID^E:5.9e-124^RecName: Full=FAD-linked oxidoreductase patO {ECO:0000303|PubMed:19383676}	PF01565.22^FAD_binding_4^FAD binding domain^127-267^E:4e-20`PF08031.11^BBE^Berberine and berberine like^512-548^E:5.6e-09	.	KEGG:act:ACLA_093700	GO:0071949^molecular_function^FAD binding`GO:0016491^molecular_function^oxidoreductase activity	GO:0016491^molecular_function^oxidoreductase activity`GO:0050660^molecular_function^flavin adenine dinucleotide binding`GO:0055114^biological_process^oxidation-reduction process
GH17	#N/A	#N/A	LE01Gene06060	4.89709	5.02752	5.79678	6.96599	6.44068	7.05965	1.57263	0.000361865	0.00101745	LE01Gene06060	BTGC_ASPNC^BTGC_ASPNC^Q:462-1259,H:376-639^28.1%ID^E:7.2e-20^RecName: Full=Putative glucan endo-1,3-beta-glucosidase btgC	.	.	KEGG:ang:ANI_1_1742064	GO:0016021^cellular_component^integral component of membrane`GO:0005886^cellular_component^plasma membrane`GO:0042973^molecular_function^glucan endo-1,3-beta-D-glucosidase activity`GO:0071555^biological_process^cell wall organization`GO:0000272^biological_process^polysaccharide catabolic process	.
GH2	#N/A	#N/A	LE01Gene01683	11.3043	11.2658	11.4355	13.0674	12.6341	12.9725	1.56635	6.74e-09	5.13e-08	LE01Gene01683	MANBB_THIHE^MANBB_THIHE^Q:1673-4219,H:7-853^45.6%ID^E:1.1e-217^RecName: Full=Beta-mannosidase B	PF07690.15^MFS_1^Major Facilitator Superfamily^89-462^E:2.9e-34`PF00703.20^Glyco_hydro_2^Glycosyl hydrolases family 2^746-852^E:4.2e-08	COG3250^hydrolase family 2	.	GO:0005576^cellular_component^extracellular region`GO:0004567^molecular_function^beta-mannosidase activity`GO:0000272^biological_process^polysaccharide catabolic process	GO:0055085^biological_process^transmembrane transport`GO:0016021^cellular_component^integral component of membrane`GO:0004553^molecular_function^hydrolase activity, hydrolyzing O-glycosyl compounds`GO:0005975^biological_process^carbohydrate metabolic process
PL14; PL36_2	#N/A	#N/A	LE01Gene03031	8.26616	7.89846	8.12626	9.70388	9.39641	9.85028	1.56045	4.7e-14	9.49e-13	LE01Gene03031	.	.	.	.	.	.
PL14; PL36_2	#N/A	#N/A	LE01Gene02213	6.03986	6.9721	6.57931	8.21728	7.98825	8.14441	1.55089	5.25e-06	2.17e-05	LE01Gene02213	.	.	.	.	.	.
GH28	#N/A	#N/A	LE01Gene03020	9.24682	9.09566	9.52387	11.4204	10.0051	10.7809	1.54913	0.00323144	0.007396	LE01Gene03020	PGLRX_COCCA^PGLRX_COCCA^Q:139-1359,H:3-426^42.5%ID^E:7.4e-84^RecName: Full=Exopolygalacturonase	PF00295.16^Glyco_hydro_28^Glycosyl hydrolases family 28^53-385^E:9.5e-69	.	.	GO:0005576^cellular_component^extracellular region`GO:0047911^molecular_function^galacturan 1,4-alpha-galacturonidase activity`GO:0004650^molecular_function^polygalacturonase activity`GO:0005975^biological_process^carbohydrate metabolic process`GO:0071555^biological_process^cell wall organization	GO:0004650^molecular_function^polygalacturonase activity`GO:0005975^biological_process^carbohydrate metabolic process
GH12	Cellulase	Endo-beta-1,4-glucanase	LE01Gene12231	8.28293	8.26483	7.89767	10.4883	9.35383	8.68156	1.54764	0.00172905	0.00420177	LE01Gene12231	XGEA_EMENI^XGEA_EMENI^Q:987-1613,H:21-239^39.2%ID^E:5e-30^RecName: Full=Xyloglucan-specific endo-beta-1,4-glucanase A	.	.	.	.	.
GH43	#N/A	#N/A	LE01Gene09852	8.5659	8.27824	8.17703	10.349	9.65207	9.52613	1.54251	1.66e-05	6.24e-05	LE01Gene09852	ABNA_ASPFN^ABNA_ASPFN^Q:528-1493,H:6-319^43.3%ID^E:1.4e-58^RecName: Full=Probable arabinan endo-1,5-alpha-L-arabinosidase A	PF04616.13^Glyco_hydro_43^Glycosyl hydrolases family 43^32-306^E:5.6e-24	.	KEGG:afv:AFLA_059500`KO:K06113	GO:0005576^cellular_component^extracellular region`GO:0046558^molecular_function^arabinan endo-1,5-alpha-L-arabinosidase activity`GO:0031222^biological_process^arabinan catabolic process`GO:0045493^biological_process^xylan catabolic process	GO:0004553^molecular_function^hydrolase activity, hydrolyzing O-glycosyl compounds`GO:0005975^biological_process^carbohydrate metabolic process
AA7	#N/A	#N/A	LE01Gene08676	6.91513	6.79672	7.25687	8.57095	8.42033	8.54474	1.51736	3.54e-07	1.88e-06	LE01Gene08676	A7056_ARTBC^A7056_ARTBC^Q:156-1832,H:26-587^35.7%ID^E:1.5e-84^RecName: Full=Uncharacterized FAD-linked oxidoreductase ARB_02478 {ECO:0000305}	.	.	.	.	.
GH105	#N/A	#N/A	LE01Gene10169	10.0066	9.93826	10.7616	11.9404	11.3532	12.0253	1.51691	3.01e-06	1.31e-05	LE01Gene10169	URHG1_BACSU^URHG1_BACSU^Q:513-1124,H:77-266^27.1%ID^E:1e-06^RecName: Full=Unsaturated rhamnogalacturonyl hydrolase YesR	PF07470.12^Glyco_hydro_88^Glycosyl Hydrolase Family 88^133-337^E:4.1e-14	.	.	.	.
GH3	Hemicellulase	beta-xylosidase	LE01Gene05156	8.76405	9.13306	9.80783	11.3259	10.1002	10.7284	1.50368	0.00286429	0.00664941	LE01Gene05156	BXLB_ASPFC^BXLB_ASPFC^Q:161-2464,H:10-767^55.3%ID^E:1.5e-241^RecName: Full=Probable exo-1,4-beta-xylosidase bxlB	PF00933.20^Glyco_hydro_3^Glycosyl hydrolase family 3 N terminal domain^104-325^E:1.7e-24`PF01915.21^Glyco_hydro_3_C^Glycosyl hydrolase family 3 C-terminal domain^400-625^E:6e-43`PF14310.5^Fn3-like^Fibronectin type III-like domain^689-747^E:6.1e-09	.	.	GO:0005576^cellular_component^extracellular region`GO:0009044^molecular_function^xylan 1,4-beta-xylosidase activity`GO:0045493^biological_process^xylan catabolic process	GO:0004553^molecular_function^hydrolase activity, hydrolyzing O-glycosyl compounds`GO:0005975^biological_process^carbohydrate metabolic process
GH79	#N/A	#N/A	LE01Gene00946	7.59678	7.18654	8.45653	9.70209	8.73984	9.35202	1.47445	0.00272056	0.00635614	LE01Gene00946	GUS79_ASPNC^GUS79_ASPNC^Q:175-1743,H:31-541^26%ID^E:7e-26^RecName: Full=Beta-glucuronidase {ECO:0000303|PubMed:18377882}	.	.	.	.	.
GT1	#N/A	#N/A	LE01Gene13734	11.297	11.031	11.8704	13.4038	12.4408	12.7127	1.46852	0.00420192	0.00936243	LE01Gene13734	U71K1_MALDO^U71K1_MALDO^Q:75-1562,H:2-461^24%ID^E:2.3e-19^RecName: Full=UDP-glycosyltransferase 71K1 {ECO:0000303|Ref.1}	PF00201.17^UDPGT^UDP-glucoronosyl and UDP-glucosyl transferase^327-452^E:8.4e-21	.	KEGG:ag:BAO01109`KO:K21373	GO:0102970^molecular_function^7-deoxyloganetic acid glucosyltransferase activity`GO:0035251^molecular_function^UDP-glucosyltransferase activity`GO:1900994^biological_process^(-)-secologanin biosynthetic process	GO:0016758^molecular_function^transferase activity, transferring hexosyl groups
GH3	Hemicellulase	beta-xylosidase	LE01Gene06168	9.57425	9.15505	9.66638	11.0447	10.7278	11.0087	1.45316	6.4e-08	3.95e-07	LE01Gene06168	BGLX_ECOLI^BGLX_ECOLI^Q:235-2982,H:24-750^25.1%ID^E:8.3e-63^RecName: Full=Periplasmic beta-glucosidase	PF00933.20^Glyco_hydro_3^Glycosyl hydrolase family 3 N terminal domain^110-382^E:1.2e-39`PF01915.21^Glyco_hydro_3_C^Glycosyl hydrolase family 3 C-terminal domain^433-843^E:5.6e-42`PF07691.11^PA14^PA14 domain^537-675^E:4.8e-10`PF14310.5^Fn3-like^Fibronectin type III-like domain^885-953^E:8.4e-13	.	.	GO:0005576^cellular_component^extracellular region`GO:0008422^molecular_function^beta-glucosidase activity`GO:0102483^molecular_function^scopolin beta-glucosidase activity`GO:0030245^biological_process^cellulose catabolic process	GO:0004553^molecular_function^hydrolase activity, hydrolyzing O-glycosyl compounds`GO:0005975^biological_process^carbohydrate metabolic process
GH16_2	#N/A	#N/A	LE01Gene00492	11.3567	11.009	11.7025	12.6197	12.8304	13.0295	1.45281	3.15e-12	4.62e-11	LE01Gene00492	SKN1_CANAX^SKN1_CANAX^Q:922-2463,H:246-736^41%ID^E:3.2e-103^RecName: Full=Beta-glucan synthesis-associated protein SKN1	.	.	.	.	.
AA1	Lignin Oxidase	multicopper oxidase	LE01Gene08330	8.87882	8.04172	8.23917	9.67681	9.72548	10.143	1.43405	1.11e-05	4.33e-05	LE01Gene08330	LAC1_PHLRA^LAC1_PHLRA^Q:13-1587,H:8-515^65.9%ID^E:3.2e-199^RecName: Full=Laccase	.	.	.	.	.
GH55	#N/A	#N/A	LE01Gene12491	8.52066	8.37301	8.80651	10.096	9.92841	9.94951	1.41694	1.42e-18	6.24e-17	LE01Gene12491	EXG1_COCCA^EXG1_COCCA^Q:45-2321,H:26-781^40.1%ID^E:2e-157^RecName: Full=Glucan 1,3-beta-glucosidase	PF12708.6^Pectate_lyase_3^Pectate lyase superfamily protein^60-287^E:7.3e-79`PF12708.6^Pectate_lyase_3^Pectate lyase superfamily protein^419-487^E:5.6e-12	.	.	GO:0004338^molecular_function^glucan exo-1,3-beta-glucosidase activity`GO:0071555^biological_process^cell wall organization`GO:0008152^biological_process^metabolic process	.
GH28	#N/A	#N/A	LE01Gene13684	8.42946	8.17203	8.9829	10.2739	9.44937	10.045	1.39599	6.75e-05	0.000221133	LE01Gene13684	RGXB_ASPNC^RGXB_ASPNC^Q:38-1276,H:1-416^43.2%ID^E:2.1e-95^RecName: Full=Alpha-L-rhamnosidase rgxB	PF00295.16^Glyco_hydro_28^Glycosyl hydrolases family 28^133-418^E:2.2e-39	.	KEGG:ang:ANI_1_1122034	GO:0005576^cellular_component^extracellular region`GO:0030596^molecular_function^alpha-L-rhamnosidase activity`GO:0004650^molecular_function^polygalacturonase activity`GO:0071555^biological_process^cell wall organization`GO:0000272^biological_process^polysaccharide catabolic process	GO:0004650^molecular_function^polygalacturonase activity`GO:0005975^biological_process^carbohydrate metabolic process
GH16_2	#N/A	#N/A	LE01Gene04938	8.89254	8.74247	9.11423	10.1729	10.4599	10.2291	1.36991	1.94e-13	3.49e-12	LE01Gene04938	KRE6_YEAST^KRE6_YEAST^Q:285-1847,H:211-711^40.4%ID^E:5.3e-100^RecName: Full=Beta-glucan synthesis-associated protein KRE6	.	.	.	.	.
GT15	#N/A	#N/A	LE01Gene02724	9.32177	9.62653	9.54687	10.8732	10.7142	11.0047	1.36618	6.66e-12	9.1e-11	LE01Gene02724	MNT2_CANAL^MNT2_CANAL^Q:1047-1922,H:137-429^53.9%ID^E:2.1e-99^RecName: Full=Glycolipid 2-alpha-mannosyltransferase 2	PF01793.15^Glyco_transf_15^Glycolipid 2-alpha-mannosyltransferase^45-266^E:6.1e-91	.	KEGG:cal:CAALFM_C301830CA`KO:K10967	GO:0000139^cellular_component^Golgi membrane`GO:0016021^cellular_component^integral component of membrane`GO:0000026^molecular_function^alpha-1,2-mannosyltransferase activity`GO:0043710^biological_process^cell adhesion involved in multi-species biofilm formation`GO:0098609^biological_process^cell-cell adhesion`GO:0007160^biological_process^cell-matrix adhesion`GO:0051834^biological_process^evasio…	GO:0000030^molecular_function^mannosyltransferase activity`GO:0006486^biological_process^protein glycosylation`GO:0016020^cellular_component^membrane
GH30	#N/A	#N/A	LE01Gene13816	10.9817	10.8346	10.4488	12.8496	11.5804	11.5751	1.36354	0.000483785	0.00132706	LE01Gene13816	.	.	.	.	.	.
GH13; GT5	#N/A	#N/A	LE01Gene04657	12.0749	11.5353	12.75	13.476	13.6016	13.6013	1.35531	5.05e-07	2.59e-06	LE01Gene04657	AGS1_SCHPO^AGS1_SCHPO^Q:129-7226,H:14-2410^41.6%ID^E:0^RecName: Full=Cell wall alpha-1,3-glucan synthase ags1	PF00128.23^Alpha-amylase^Alpha amylase, catalytic domain^103-358^E:5.3e-12`PF08323.10^Glyco_transf_5^Starch synthase catalytic domain^1183-1388^E:9.8e-14`PF00534.19^Glycos_transf_1^Glycosyl transferases group 1^1472-1574^E:3.1e-07	.	KEGG:spo:SPCC1281.01`KO:K00749	GO:0005619^cellular_component^ascospore wall`GO:0032153^cellular_component^cell division site`GO:0051286^cellular_component^cell tip`GO:0000935^cellular_component^division septum`GO:0009897^cellular_component^external side of plasma membrane`GO:0005887^cellular_component^integral component of plasma membrane`GO:0035841^cellular_component^new growing cell tip`GO:0035840^cellular_component^old grow…	GO:0003824^molecular_function^catalytic activity`GO:0005975^biological_process^carbohydrate metabolic process
CE9	#N/A	#N/A	LE01Gene02107	10.1311	9.89827	10.0161	11.59	11.1795	11.2847	1.34458	2.85e-07	1.55e-06	LE01Gene02107	NAGA_DROME^NAGA_DROME^Q:151-1701,H:20-409^33.7%ID^E:1.7e-68^RecName: Full=N-acetylglucosamine-6-phosphate deacetylase {ECO:0000250|UniProtKB:Q9Y303}	.	.	.	.	.
GH39	#N/A	#N/A	LE01Gene06836	8.84815	9.2237	8.59875	11.0622	9.80891	9.2919	1.34185	0.000558198	0.00150923	LE01Gene06836	.	.	.	.	.	.
GH71	#N/A	#N/A	LE01Gene00554	5.91632	6.49346	6.53753	8.02461	7.3019	7.59554	1.33991	9.86e-05	0.000311848	LE01Gene00554	AGN1_SCHPO^AGN1_SCHPO^Q:499-1722,H:11-420^35%ID^E:1.5e-59^RecName: Full=Glucan endo-1,3-alpha-glucosidase agn1	PF03659.13^Glyco_hydro_71^Glycosyl hydrolase family 71^135-504^E:1.1e-101	.	.	GO:1990819^cellular_component^actin fusion focus`GO:0005618^cellular_component^cell wall`GO:0005576^cellular_component^extracellular region`GO:0043332^cellular_component^mating projection tip`GO:0051118^molecular_function^glucan endo-1,3-alpha-glucosidase activity`GO:0007049^biological_process^cell cycle`GO:0030995^biological_process^cell septum edging catabolic process`GO:1904541^biological_proc…	GO:0016787^molecular_function^hydrolase activity
AA1	Lignin Oxidase	multicopper oxidase	LE01Gene06108	10.1449	9.70811	10.2974	11.5085	11.1766	11.4352	1.30988	7.08e-09	5.37e-08	LE01Gene06108	LAC1_CRYNB^LAC1_CRYNB^Q:198-1814,H:43-560^30.4%ID^E:4.7e-61^RecName: Full=Laccase-1 {ECO:0000305}	.	.	.	.	.
PL7	#N/A	#N/A	LE01Gene04142	9.76836	10.0701	9.85678	11.5568	11.0685	10.8797	1.29411	0.000171331	0.000514258	LE01Gene04142	ALYA_KLEPN^ALYA_KLEPN^Q:359-634,H:15-99^39.4%ID^E:3.1e-05^RecName: Full=Alginate lyase	PF08787.10^Alginate_lyase2^Alginate lyase^41-253^E:2.1e-42	.	.	.	.
GH3	Cellulase	beta-glucosidase	LE01Gene06170	9.34592	9.09818	9.0734	10.8148	10.1484	10.3656	1.2936	2.75e-06	1.2e-05	LE01Gene06170	BGLX_ECOLI^BGLX_ECOLI^Q:2529-4733,H:38-734^30.3%ID^E:7.6e-84^RecName: Full=Periplasmic beta-glucosidase	PF00933.20^Glyco_hydro_3^Glycosyl hydrolase family 3 N terminal domain^60-395^E:3.7e-51`PF01915.21^Glyco_hydro_3_C^Glycosyl hydrolase family 3 C-terminal domain^433-685^E:8.9e-48`PF14310.5^Fn3-like^Fibronectin type III-like domain^722-750^E:2.5e-07	COG1472^hydrolase family 3	KEGG:stm:STM2166`KO:K05349	GO:0042597^cellular_component^periplasmic space`GO:0005886^cellular_component^plasma membrane`GO:0008422^molecular_function^beta-glucosidase activity`GO:0102483^molecular_function^scopolin beta-glucosidase activity`GO:0009251^biological_process^glucan catabolic process	GO:0004553^molecular_function^hydrolase activity, hydrolyzing O-glycosyl compounds`GO:0005975^biological_process^carbohydrate metabolic process
AA3; AA8	Lignin Degrading Auxiliary enzyme	aryl-alcohol oxidase	LE01Gene04010	8.00827	7.70667	7.02457	9.01609	8.78632	8.92151	1.27963	0.000445125	0.00123083	LE01Gene04010	PDH3_LEUMG^PDH3_LEUMG^Q:151-1818,H:41-599^40.5%ID^E:2e-110^RecName: Full=Pyranose dehydrogenase 3 {ECO:0000303|PubMed:18097667}	PF00732.18^GMC_oxred_N^GMC oxidoreductase^33-342^E:2.9e-66`PF05199.12^GMC_oxred_C^GMC oxidoreductase^445-580^E:2.4e-35	.	.	GO:0005576^cellular_component^extracellular region`GO:0050660^molecular_function^flavin adenine dinucleotide binding`GO:0033718^molecular_function^pyranose dehydrogenase (acceptor) activity`GO:0005975^biological_process^carbohydrate metabolic process	GO:0016614^molecular_function^oxidoreductase activity, acting on CH-OH group of donors`GO:0050660^molecular_function^flavin adenine dinucleotide binding`GO:0055114^biological_process^oxidation-reduction process
GH1	Cellulase	beta-glucosidase	LE01Gene06300	10.8758	10.416	11.8295	12.4179	12.3488	12.5407	1.27407	0.000325466	0.000923772	LE01Gene06300	BGL06_ORYSJ^BGL06_ORYSJ^Q:496-1890,H:50-511^34%ID^E:2.1e-71^RecName: Full=Beta-glucosidase 6 {ECO:0000305}	PF00232.17^Glyco_hydro_1^Glycosyl hydrolase family 1^165-640^E:3.6e-103	COG2723^beta-glucosidase	KEGG:osa:4332041`KO:K01188	GO:0005576^cellular_component^extracellular region`GO:0033907^molecular_function^beta-D-fucosidase activity`GO:0004565^molecular_function^beta-galactosidase activity`GO:0080083^molecular_function^beta-gentiobiose beta-glucosidase activity`GO:0008422^molecular_function^beta-glucosidase activity`GO:0080079^molecular_function^cellobiose glucosidase activity`GO:0042973^molecular_function^glucan endo-…	GO:0004553^molecular_function^hydrolase activity, hydrolyzing O-glycosyl compounds`GO:0005975^biological_process^carbohydrate metabolic process
GT90	#N/A	#N/A	LE01Gene13995	10.3227	10.144	10.0499	10.9078	11.8371	11.398	1.25427	3.56e-05	0.000124192	LE01Gene13995	CXT1_CRYNJ^CXT1_CRYNJ^Q:1895-3436,H:152-661^33.9%ID^E:2.6e-81^RecName: Full=Beta-1,2-xylosyltransferase 1	.	.	.	.	.
AA5	Lignin Degrading Auxiliary enzyme	Glyoxal oxidase	LE01Gene04793	10.9707	11.4002	11.373	11.8036	13.178	12.0948	1.22602	0.00424008	0.00943845	LE01Gene04793	WSCD1_ARTBC^WSCD1_ARTBC^Q:2371-4941,H:63-924^52.3%ID^E:1.1e-269^RecName: Full=WSC domain-containing protein ARB_07867 {ECO:0000305}	.	.	.	.	.
GH28	#N/A	#N/A	LE01Gene05940	7.06809	7.61093	7.77718	9.09182	8.58365	8.4259	1.21788	0.00212753	0.00507612	LE01Gene05940	PGXC_ASPFN^PGXC_ASPFN^Q:505-1749,H:46-434^36.5%ID^E:9.8e-67^RecName: Full=Probable exopolygalacturonase C	.	.	.	.	.
GH16	#N/A	#N/A	LE01Gene11628	8.04315	8.0099	8.22169	9.29774	9.17437	9.4198	1.20907	3.15e-05	0.000111632	LE01Gene11628	BGBP_PENMO^BGBP_PENMO^Q:721-1767,H:31-361^39.2%ID^E:1.7e-55^RecName: Full=Beta-1,3-glucan-binding protein {ECO:0000312|EMBL:AAM21213.1}	.	.	.	.	.
GH154	#N/A	#N/A	LE01Gene11296	9.82385	9.32416	9.83395	11.0538	10.7142	10.8338	1.19551	1.99e-06	8.98e-06	LE01Gene11296	.	.	.	.	.	.
GH106	#N/A	#N/A	LE01Gene12253	10.6062	10.2825	10.5951	11.8074	11.3812	11.8551	1.1946	5.38e-10	5e-09	LE01Gene12253	.	PF17132.3^Glyco_hydro_106^alpha-L-rhamnosidase^204-729^E:2e-24	.	.	.	.
GT49	#N/A	#N/A	LE01Gene03872	6.81491	6.41464	6.97326	7.63973	8.01972	8.08997	1.18411	0.00186798	0.00450188	LE01Gene03872	GNT14_DICDI^GNT14_DICDI^Q:518-1357,H:348-620^27.1%ID^E:4.8e-17^RecName: Full=Glycosyltransferase-like protein gnt14	PF13896.5^Glyco_transf_49^Glycosyl-transferase for dystroglycan^130-198^E:9.4e-12`PF13896.5^Glyco_transf_49^Glycosyl-transferase for dystroglycan^201-406^E:1.6e-52	ENOG410XRNY^Glucoside xylosyltransferase	KEGG:ddi:DDB_G0274741	GO:0016021^cellular_component^integral component of membrane`GO:0016338^biological_process^calcium-independent cell-cell adhesion via plasma membrane cell-adhesion molecules`GO:0030587^biological_process^sorocarp development	.
GH5	#N/A	#N/A	LE01Gene07850	7.45599	7.08839	7.90864	8.25193	8.90623	8.85481	1.18089	0.00290886	0.00673949	LE01Gene07850	EXG3_SCHPO^EXG3_SCHPO^Q:109-1578,H:4-448^30%ID^E:1.6e-58^RecName: Full=Glucan 1,3-beta-glucosidase 3	PF00150.17^Cellulase^Cellulase (glycosyl hydrolase family 5)^111-391^E:3.3e-17	.	KEGG:spo:SPBC2D10.05	GO:1990819^cellular_component^actin fusion focus`GO:0009986^cellular_component^cell surface`GO:0005737^cellular_component^cytoplasm`GO:0005829^cellular_component^cytosol`GO:0005576^cellular_component^extracellular region`GO:0005634^cellular_component^nucleus`GO:0046557^molecular_function^glucan endo-1,6-beta-glucosidase activity`GO:0004338^molecular_function^glucan exo-1,3-beta-glucosidase activi…	GO:0004553^molecular_function^hydrolase activity, hydrolyzing O-glycosyl compounds`GO:0005975^biological_process^carbohydrate metabolic process
AA1	Lignin Oxidase	multicopper oxidase	LE01Gene04648	8.29538	8.26483	8.71576	9.60587	9.20207	9.93975	1.17545	0.00104126	0.00266493	LE01Gene04648	LAC2_AGABI^LAC2_AGABI^Q:851-2422,H:1-520^43.8%ID^E:2.7e-124^RecName: Full=Laccase-2	.	.	.	.	.
CBM21	#N/A	#N/A	LE01Gene05981	10.2467	10.0468	10.2859	11.4659	11.3736	11.1961	1.15328	0.000568157	0.00153367	LE01Gene05981	PPR3E_MOUSE^PPR3E_MOUSE^Q:2154-2459,H:172-256^32.4%ID^E:5.6e-05^RecName: Full=Protein phosphatase 1 regulatory subunit 3E	PF03370.12^CBM_21^Carbohydrate/starch-binding module (family 21)^440-562^E:5.5e-20	.	.	.	GO:0005515^molecular_function^protein binding
GH27	#N/A	#N/A	LE01Gene01844	11.2914	11.0816	11.9888	12.4182	12.5366	12.9514	1.14613	0.00186264	0.00448991	LE01Gene01844	AGALB_NEOFI^AGALB_NEOFI^Q:1117-2337,H:3-443^41.5%ID^E:8.5e-90^RecName: Full=Probable alpha-galactosidase B	.	.	.	GO:0005576^cellular_component^extracellular region`GO:0052692^molecular_function^raffinose alpha-galactosidase activity`GO:0005975^biological_process^carbohydrate metabolic process	.
GH43	#N/A	#N/A	LE01Gene10432	10.0623	9.58933	9.78866	11.2199	10.6728	10.8338	1.10155	7.59e-06	3.05e-05	LE01Gene10432	GH43B_BACO1^GH43B_BACO1^Q:1739-3478,H:18-523^34%ID^E:3e-72^RecName: Full=Non-reducing end alpha-L-arabinofuranosidase BoGH43B	PF04616.13^Glyco_hydro_43^Glycosyl hydrolases family 43^10-332^E:1.8e-65	COG3507^hydrolase family 43	.	GO:0042597^cellular_component^periplasmic space`GO:0046556^molecular_function^alpha-L-arabinofuranosidase activity`GO:0085030^biological_process^symbiont process benefiting host`GO:2000899^biological_process^xyloglucan catabolic process	GO:0004553^molecular_function^hydrolase activity, hydrolyzing O-glycosyl compounds`GO:0005975^biological_process^carbohydrate metabolic process
GT15	#N/A	#N/A	LE01Gene00134	8.3159	8.77439	8.59875	9.65848	9.38437	9.90863	1.09335	1.85e-06	8.39e-06	LE01Gene00134	MNT2_CANAL^MNT2_CANAL^Q:697-1632,H:133-445^52.7%ID^E:1.2e-104^RecName: Full=Glycolipid 2-alpha-mannosyltransferase 2	PF01793.15^Glyco_transf_15^Glycolipid 2-alpha-mannosyltransferase^83-359^E:3.3e-121	.	KEGG:cal:CAALFM_C301830CA`KO:K10967	GO:0000139^cellular_component^Golgi membrane`GO:0016021^cellular_component^integral component of membrane`GO:0000026^molecular_function^alpha-1,2-mannosyltransferase activity`GO:0043710^biological_process^cell adhesion involved in multi-species biofilm formation`GO:0098609^biological_process^cell-cell adhesion`GO:0007160^biological_process^cell-matrix adhesion`GO:0051834^biological_process^evasio…	GO:0000030^molecular_function^mannosyltransferase activity`GO:0006486^biological_process^protein glycosylation`GO:0016020^cellular_component^membrane
GH18	#N/A	#N/A	LE01Gene07656	9.28478	9.16953	9.44132	10.4258	10.2054	10.5298	1.09156	0.00319413	0.00732034	LE01Gene07656	CHIA1_BACCI^CHIA1_BACCI^Q:2346-3308,H:154-451^27.9%ID^E:1.3e-27^RecName: Full=Chitinase A1	PF01062.20^Bestrophin^Bestrophin, RFP-TM, chloride channel^40-210^E:1.7e-14`PF01062.20^Bestrophin^Bestrophin, RFP-TM, chloride channel^385-509^E:3.2e-21`PF00704.27^Glyco_hydro_18^Glycosyl hydrolases family 18^589-957^E:2.1e-57	COG3781^UPF0187 protein	KEGG:ana:alr2987`KO:K08994	GO:0016021^cellular_component^integral component of membrane`GO:0005886^cellular_component^plasma membrane	GO:0005975^biological_process^carbohydrate metabolic process
AA1	Lignin Oxidase	multicopper oxidase	LE01Gene05032	11.4695	10.6274	10.3375	11.8182	12.1093	11.9943	1.08452	2.41e-05	8.76e-05	LE01Gene05032	FER1_USTMA^FER1_USTMA^Q:134-1903,H:20-618^46.4%ID^E:6.6e-157^RecName: Full=Iron multicopper oxidase fer1 {ECO:0000303|PubMed:17138696}	PF07732.14^Cu-oxidase_3^Multicopper oxidase^32-147^E:3.6e-29`PF00394.21^Cu-oxidase^Multicopper oxidase^154-317^E:4.2e-34`PF07731.13^Cu-oxidase_2^Multicopper oxidase^410-517^E:6.5e-35	.	KEGG:uma:UMAG_00105`KO:K19791	GO:0033573^cellular_component^high-affinity iron permease complex`GO:0005507^molecular_function^copper ion binding`GO:0004322^molecular_function^ferroxidase activity`GO:0033215^biological_process^iron assimilation by reduction and transport`GO:0034755^biological_process^iron ion transmembrane transport`GO:0006826^biological_process^iron ion transport`GO:0009405^biological_process^pathogenesis	GO:0005507^molecular_function^copper ion binding`GO:0055114^biological_process^oxidation-reduction process`GO:0016491^molecular_function^oxidoreductase activity
GT1	#N/A	#N/A	LE01Gene00561	10.0768	9.76799	9.98407	11.0775	10.927	11.0866	1.08417	8.92e-07	4.34e-06	LE01Gene00561	U80A2_ARATH^U80A2_ARATH^Q:317-1612,H:191-611^47.1%ID^E:3.3e-116^RecName: Full=Sterol 3-beta-glucosyltransferase UGT80A2	PF03033.19^Glyco_transf_28^Glycosyltransferase family 28 N-terminal domain^110-258^E:2e-20`PF00201.17^UDPGT^UDP-glucoronosyl and UDP-glucosyl transferase^373-482^E:4.3e-05	COG1819^Transferase	KEGG:ath:AT3G07020`KO:K05841	GO:0043231^cellular_component^intracellular membrane-bounded organelle`GO:0016020^cellular_component^membrane`GO:0005886^cellular_component^plasma membrane`GO:0051507^molecular_function^beta-sitosterol UDP-glucosyltransferase activity`GO:0102203^molecular_function^brassicasterol glucosyltransferase activity`GO:0102205^molecular_function^cholesterol allpha-glucosyltransferase activity`GO:0080043^m…	GO:0016758^molecular_function^transferase activity, transferring hexosyl groups`GO:0005975^biological_process^carbohydrate metabolic process`GO:0030259^biological_process^lipid glycosylation
GH92	#N/A	#N/A	LE01Gene07926	11.0291	10.354	10.8834	12.0563	11.4882	11.9667	1.07475	0.0013662	0.00339251	LE01Gene07926	A7629_ARTBC^A7629_ARTBC^Q:380-2779,H:7-761^34.8%ID^E:1.5e-127^RecName: Full=Uncharacterized secreted glycosidase ARB_07629 {ECO:0000305}	.	.	.	.	.
GH16	#N/A	#N/A	LE01Gene06326	7.06809	7.32228	7.08383	8.23718	8.15813	8.2565	1.06081	1.2e-06	5.7e-06	LE01Gene06326	.	PF00722.20^Glyco_hydro_16^Glycosyl hydrolases family 16^159-306^E:5.9e-10	.	.	.	GO:0004553^molecular_function^hydrolase activity, hydrolyzing O-glycosyl compounds`GO:0005975^biological_process^carbohydrate metabolic process
GH20	#N/A	#N/A	LE01Gene02645	9.46091	9.0676	9.40111	10.3189	10.2403	10.5149	1.04374	3.45e-06	1.49e-05	LE01Gene02645	HEXA_PORGI^HEXA_PORGI^Q:150-1448,H:61-504^22%ID^E:2.6e-13^RecName: Full=Beta-hexosaminidase	PF00728.21^Glyco_hydro_20^Glycosyl hydrolase family 20, catalytic domain^152-480^E:3.4e-21	.	.	.	GO:0004553^molecular_function^hydrolase activity, hydrolyzing O-glycosyl compounds`GO:0005975^biological_process^carbohydrate metabolic process
CBM67	#N/A	#N/A	LE01Gene03573	8.5452	8.2238	8.00376	9.26902	9.19059	9.41175	1.02077	0.000124128	0.000382997	LE01Gene03573	.	.	.	.	.	.
GT4	#N/A	#N/A	LE01Gene00638	14.256	13.8724	14.922	15.2764	15.6513	15.3287	1.01203	9.23e-05	0.000293431	LE01Gene00638	TREPH_PLEPU^TREPH_PLEPU^Q:33-2240,H:1-739^76.8%ID^E:0^RecName: Full=Trehalose phosphorylase {ECO:0000312|EMBL:ABR88135.1}	.	.	.	.	.
CBM20; GH15	#N/A	#N/A	LE01Gene04191	12.1281	12.0681	11.7299	10.7075	11.1507	11.0358	-1.00932	2.12e-07	1.18e-06	LE01Gene04191	AMYG_SCHCM^AMYG_SCHCM^Q:562-2271,H:3-576^61.7%ID^E:4.2e-201^RecName: Full=Glucoamylase ARB_02327-1 {ECO:0000305}	PF00723.20^Glyco_hydro_15^Glycosyl hydrolases family 15^33-447^E:1.1e-89`PF00686.18^CBM_20^Starch binding domain^476-566^E:2.7e-27	COG3387^glycoside hydrolase 15-related	KEGG:scm:SCHCODRAFT_57589`KO:K01178	GO:0005576^cellular_component^extracellular region`GO:0004339^molecular_function^glucan 1,4-alpha-glucosidase activity`GO:2001070^molecular_function^starch binding`GO:0000272^biological_process^polysaccharide catabolic process	GO:2001070^molecular_function^starch binding
AA5	Lignin Degrading Auxiliary enzyme	Glyoxal oxidase	LE01Gene04633	14.9826	14.7306	14.3727	13.5697	13.7963	13.7459	-1.00953	3.91e-10	3.75e-09	LE01Gene04633	GLOX_PHACH^GLOX_PHACH^Q:413-2224,H:2-553^30.9%ID^E:7.7e-67^RecName: Full=Aldehyde oxidase GLOX {ECO:0000305}	.	.	.	.	.
GH9	Cellulase	Endo-beta-1,4-glucanase	LE01Gene08227	11.76	11.5721	11.5754	10.5202	10.8393	10.471	-1.01927	9.92e-13	1.55e-11	LE01Gene08227	GUN4_THEFU^GUN4_THEFU^Q:106-1608,H:36-485^37.1%ID^E:5.9e-72^RecName: Full=Endoglucanase E-4	PF00759.18^Glyco_hydro_9^Glycosyl hydrolase family 9^53-532^E:5e-108	ENOG410XPC9^hydrolase family	.	GO:0008810^molecular_function^cellulase activity`GO:0030248^molecular_function^cellulose binding`GO:0030245^biological_process^cellulose catabolic process	GO:0004553^molecular_function^hydrolase activity, hydrolyzing O-glycosyl compounds`GO:0005975^biological_process^carbohydrate metabolic process
PL35	#N/A	#N/A	LE01Gene10427	14.6934	14.6034	14.1698	13.359	13.554	13.5179	-1.02696	1.24e-11	1.6e-10	LE01Gene10427	.	PF07940.12^Hepar_II_III^Heparinase II/III-like protein^526-726^E:6e-08	.	.	.	GO:0016829^molecular_function^lyase activity
CE17	#N/A	#N/A	LE01Gene05798	12.6335	12.5437	12.0965	11.2769	11.5551	11.335	-1.04912	3.05e-08	2e-07	LE01Gene05798	RWD2B_HUMAN^RWD2B_HUMAN^Q:414-653,H:194-271^40%ID^E:5.2e-11^RecName: Full=RWD domain-containing protein 2B	.	.	.	.	.
CE4	#N/A	#N/A	LE01Gene02924	15.2028	15.2713	15.4233	13.6401	14.7825	14.0223	-1.07363	0.00137602	0.00341189	LE01Gene02924	CDA_AMYRO^CDA_AMYRO^Q:175-1104,H:46-358^46.4%ID^E:4.9e-80^RecName: Full=Chitin deacetylase	PF01522.20^Polysacc_deac_1^Polysaccharide deacetylase^142-256^E:2.4e-25	.	.	GO:0004099^molecular_function^chitin deacetylase activity`GO:0006032^biological_process^chitin catabolic process`GO:0000272^biological_process^polysaccharide catabolic process	GO:0016810^molecular_function^hydrolase activity, acting on carbon-nitrogen (but not peptide) bonds`GO:0005975^biological_process^carbohydrate metabolic process
GT8	#N/A	#N/A	LE01Gene00367	12.7736	12.4808	12.3038	11.4144	11.5618	11.3883	-1.07595	0.000100044	0.000315429	LE01Gene00367	GYG1_CAEEL^GYG1_CAEEL^Q:109-771,H:4-219^44.9%ID^E:6e-44^RecName: Full=Glycogenin-1 {ECO:0000312|WormBase:F56B6.4a}	.	.	.	.	.
GH13	#N/A	#N/A	LE01Gene01055	10.3257	10.3476	10.2583	9.15072	9.25371	9.27426	-1.0849	1.42e-09	1.23e-08	LE01Gene01055	AMY_GEOSE^AMY_GEOSE^Q:153-1580,H:39-515^42.1%ID^E:2.3e-104^RecName: Full=Alpha-amylase	PF00128.23^Alpha-amylase^Alpha amylase, catalytic domain^54-390^E:1.7e-20	.	.	GO:0005576^cellular_component^extracellular region`GO:0004556^molecular_function^alpha-amylase activity`GO:0103025^molecular_function^alpha-amylase activity (releasing maltohexaose)`GO:0005509^molecular_function^calcium ion binding`GO:0005975^biological_process^carbohydrate metabolic process	GO:0003824^molecular_function^catalytic activity`GO:0005975^biological_process^carbohydrate metabolic process
GH13	#N/A	#N/A	LE01Gene13578	12.9708	13.3079	12.7221	11.8334	12.0754	11.7847	-1.11705	4.4e-07	2.29e-06	LE01Gene13578	AMY1_SCHOC^AMY1_SCHOC^Q:172-1581,H:36-511^45.1%ID^E:5e-114^RecName: Full=Alpha-amylase 1	PF00128.23^Alpha-amylase^Alpha amylase, catalytic domain^98-396^E:9.1e-48`PF09260.10^DUF1966^Domain of unknown function (DUF1966)^450-526^E:2.6e-18	.	.	GO:0005576^cellular_component^extracellular region`GO:0004556^molecular_function^alpha-amylase activity`GO:0103025^molecular_function^alpha-amylase activity (releasing maltohexaose)`GO:0005509^molecular_function^calcium ion binding`GO:0016052^biological_process^carbohydrate catabolic process	GO:0003824^molecular_function^catalytic activity`GO:0005975^biological_process^carbohydrate metabolic process`GO:0004556^molecular_function^alpha-amylase activity`GO:0005509^molecular_function^calcium ion binding`GO:0016052^biological_process^carbohydrate catabolic process
GH31	#N/A	#N/A	LE01Gene04444	12.3865	12.2539	11.8982	10.754	11.2547	11.1302	-1.13265	1.49e-05	5.66e-05	LE01Gene04444	GLU2A_SCHPO^GLU2A_SCHPO^Q:319-2832,H:31-850^43.9%ID^E:4.9e-210^RecName: Full=Glucosidase 2 subunit alpha {ECO:0000250|UniProtKB:P38138}	.	.	.	.	.
GH31	#N/A	#N/A	LE01Gene09429	12.5446	12.4336	12.6664	11.3335	11.3199	11.5737	-1.1378	3.56e-07	1.9e-06	LE01Gene09429	AGLU_CANTS^AGLU_CANTS^Q:1008-3767,H:57-1054^41.8%ID^E:3.3e-210^RecName: Full=Alpha-glucosidase	PF16863.4^NtCtMGAM_N^N-terminal barrel of NtMGAM and CtMGAM, maltase-glucoamylase^49-186^E:7.6e-30`PF01055.25^Glyco_hydro_31^Glycosyl hydrolases family 31^289-828^E:3.2e-141	.	.	GO:0004558^molecular_function^alpha-1,4-glucosidase activity`GO:0030246^molecular_function^carbohydrate binding`GO:0032450^molecular_function^maltose alpha-glucosidase activity	GO:0004553^molecular_function^hydrolase activity, hydrolyzing O-glycosyl compounds`GO:0005975^biological_process^carbohydrate metabolic process
GT22	#N/A	#N/A	LE01Gene00318	11.5296	11.2747	11.0573	9.94228	10.5344	9.88702	-1.14849	5.55e-06	2.29e-05	LE01Gene00318	ALG9_SCHPO^ALG9_SCHPO^Q:247-2178,H:11-565^35.8%ID^E:3.5e-98^RecName: Full=Alpha-1,2-mannosyltransferase alg9	PF03901.16^Glyco_transf_22^Alg9-like mannosyltransferase family^53-530^E:9.1e-76	.	KEGG:spo:SPAC1834.05`KO:K03846	GO:0005783^cellular_component^endoplasmic reticulum`GO:0030176^cellular_component^integral component of endoplasmic reticulum membrane`GO:0052926^molecular_function^dol-P-Man:Man(6)GlcNAc(2)-PP-Dol alpha-1,2-mannosyltransferase activity`GO:0052918^molecular_function^dol-P-Man:Man(8)GlcNAc(2)-PP-Dol alpha-1,2-mannosyltransferase activity`GO:0000030^molecular_function^mannosyltransferase activity`G…	GO:0016757^molecular_function^transferase activity, transferring glycosyl groups
AA14	#N/A	#N/A	LE01Gene02669	12.3063	12.1406	11.9801	10.9641	10.8742	11.149	-1.14851	2.64e-08	1.76e-07	LE01Gene02669	.	.	.	.	.	.
GH92	#N/A	#N/A	LE01Gene11792	12.8403	12.4505	12.4154	11.4648	11.4565	11.3655	-1.1526	1.36e-08	9.67e-08	LE01Gene11792	KN7L_ORYSJ^KN7L_ORYSJ^Q:3561-4175,H:2-219^40.7%ID^E:9.6e-34^RecName: Full=Kinesin-like protein KIN-7L {ECO:0000305}	.	.	.	.	.
CBM18; GH16	#N/A	#N/A	LE01Gene11302	12.2872	12.4829	11.8704	11.4409	10.6859	11.02	-1.15384	3.96e-06	1.69e-05	LE01Gene11302	CRF2_ASPFU^CRF2_ASPFU^Q:52-1098,H:6-346^43.2%ID^E:4.9e-73^RecName: Full=Probable glycosidase crf2	PF00722.20^Glyco_hydro_16^Glycosyl hydrolases family 16^112-290^E:3.2e-40	.	KEGG:afm:AFUA_2G03120	GO:0031225^cellular_component^anchored component of membrane`GO:0009277^cellular_component^fungal-type cell wall`GO:0005886^cellular_component^plasma membrane`GO:0004553^molecular_function^hydrolase activity, hydrolyzing O-glycosyl compounds`GO:0005975^biological_process^carbohydrate metabolic process`GO:0071555^biological_process^cell wall organization	GO:0004553^molecular_function^hydrolase activity, hydrolyzing O-glycosyl compounds`GO:0005975^biological_process^carbohydrate metabolic process
GT25	#N/A	#N/A	LE01Gene05153	9.93014	10.0257	9.43185	8.60198	8.53729	8.78487	-1.17515	0.00425745	0.0094681	LE01Gene05153	GT251_DANRE^GT251_DANRE^Q:1316-1840,H:387-574^28.6%ID^E:7.3e-10^RecName: Full=Procollagen galactosyltransferase 1	.	.	.	.	.
GT39	#N/A	#N/A	LE01Gene10924	13.488	13.2625	12.9303	11.9559	12.1792	11.9154	-1.22348	4.12e-10	3.94e-09	LE01Gene10924	PMT4_YEAST^PMT4_YEAST^Q:248-2329,H:56-748^44.7%ID^E:1.5e-176^RecName: Full=Dolichyl-phosphate-mannose--protein mannosyltransferase 4	PF02366.17^PMT^Dolichyl-phosphate-mannose-protein mannosyltransferase^59-304^E:2.5e-83`PF13231.5^PMT_2^Dolichyl-phosphate-mannose-protein mannosyltransferase^141-292^E:1.7e-06`PF02815.18^MIR^MIR domain^351-513^E:2.8e-17`PF16192.4^PMT_4TMC^C-terminal four TMM region of protein-O-mannosyltransferase^544-759^E:1.9e-60	.	KEGG:sce:YJR143C`KO:K00728	GO:0097582^cellular_component^dolichyl-phosphate-mannose-protein mannosyltransferase Pmt1p-Pmt2p dimer complex`GO:0097586^cellular_component^dolichyl-phosphate-mannose-protein mannosyltransferase Pmt4p homodimer complex`GO:0016021^cellular_component^integral component of membrane`GO:0004169^molecular_function^dolichyl-phosphate-mannose-protein mannosyltransferase activity`GO:0042802^molecular_fun…	GO:0000030^molecular_function^mannosyltransferase activity`GO:0006493^biological_process^protein O-linked glycosylation`GO:0016020^cellular_component^membrane
AA3	#N/A	#N/A	LE01Gene12439	10.2909	10.5812	9.9944	8.88662	9.21345	9.08732	-1.24108	8.35e-09	6.21e-08	LE01Gene12439	CITC_MONPU^CITC_MONPU^Q:185-1966,H:3-609^35.3%ID^E:1.4e-91^RecName: Full=Dehydrogenase mpl7 {ECO:0000303|PubMed:27913218}	PF00732.18^GMC_oxred_N^GMC oxidoreductase^73-383^E:1.4e-52`PF05199.12^GMC_oxred_C^GMC oxidoreductase^514-650^E:4.5e-33	.	.	GO:0050660^molecular_function^flavin adenine dinucleotide binding`GO:0016614^molecular_function^oxidoreductase activity, acting on CH-OH group of donors	GO:0016614^molecular_function^oxidoreductase activity, acting on CH-OH group of donors`GO:0050660^molecular_function^flavin adenine dinucleotide binding`GO:0055114^biological_process^oxidation-reduction process
GT90	#N/A	#N/A	LE01Gene12784	12.2882	11.9658	11.6018	10.5828	10.9826	10.5382	-1.26397	1.15e-06	5.46e-06	LE01Gene12784	CXT1_CRYNJ^CXT1_CRYNJ^Q:191-2332,H:116-661^23%ID^E:7.2e-29^RecName: Full=Beta-1,2-xylosyltransferase 1	.	.	.	.	.
AA9	Cellulase	Endo-beta-1,4-glucanase	LE01Gene03338	11.3438	11.2044	11.1034	9.89452	9.90894	10.0437	-1.27077	3.37e-09	2.73e-08	LE01Gene03338	CEL1_AGABI^CEL1_AGABI^Q:387-1118,H:16-253^33.5%ID^E:2.9e-24^RecName: Full=Cellulose-growth-specific protein	PF03443.13^Glyco_hydro_61^Glycosyl hydrolase family 61^23-240^E:1.6e-50	.	KEGG:tre:TRIREDRAFT_120961	GO:0005576^cellular_component^extracellular region`GO:0008810^molecular_function^cellulase activity`GO:0046872^molecular_function^metal ion binding`GO:0030245^biological_process^cellulose catabolic process	.
GT69	#N/A	#N/A	LE01Gene05799	12.3596	12.3632	12.0078	10.7048	11.2976	10.8033	-1.29381	2.67e-10	2.67e-09	LE01Gene05799	CMT1_CRYNJ^CMT1_CRYNJ^Q:438-1373,H:76-399^33.1%ID^E:8.8e-37^RecName: Full=Alpha-1,3-mannosyltransferase CMT1	.	.	.	.	.
GH71	#N/A	#N/A	LE01Gene04239	12.2999	12.1847	11.8205	10.6049	10.84	10.8797	-1.33626	1.31e-07	7.61e-07	LE01Gene04239	AGN1_SCHPO^AGN1_SCHPO^Q:384-1940,H:21-420^34%ID^E:4.9e-59^RecName: Full=Glucan endo-1,3-alpha-glucosidase agn1	.	.	.	.	.
CBM43; GH72	#N/A	#N/A	LE01Gene08573	13.9036	13.8625	13.6573	12.256	12.3825	12.5335	-1.41676	6.9e-17	2.33e-15	LE01Gene08573	GEL4_ASPFC^GEL4_ASPFC^Q:40-1509,H:11-481^38.4%ID^E:1.1e-81^RecName: Full=1,3-beta-glucanosyltransferase gel4	PF03198.13^Glyco_hydro_72^Glucanosyltransferase^51-361^E:2.3e-85`PF07983.12^X8^X8 domain^411-490^E:4.2e-17	.	KEGG:spo:SPAC19B12.02c	GO:0031362^cellular_component^anchored component of external side of plasma membrane`GO:0032153^cellular_component^cell division site`GO:0071944^cellular_component^cell periphery`GO:0043188^cellular_component^cell septum edging`GO:0005576^cellular_component^extracellular region`GO:0009277^cellular_component^fungal-type cell wall`GO:0035841^cellular_component^new growing cell tip`GO:0035840^cellul…	.
GH128	#N/A	#N/A	LE01Gene13878	16.2093	16.2231	15.6486	14.529	14.8255	14.4825	-1.43018	1.17e-13	2.23e-12	LE01Gene13878	ASL1_SCHPO^ASL1_SCHPO^Q:490-1191,H:299-529^30.8%ID^E:1.3e-21^RecName: Full=Alkali-sensitive linkage protein 1	.	.	.	.	.
GT66	#N/A	#N/A	LE01Gene01107	14.1587	13.9648	13.6454	12.3971	12.7313	12.3451	-1.4368	5.58e-09	4.34e-08	LE01Gene01107	STT3_SCHPO^STT3_SCHPO^Q:279-2516,H:24-742^59%ID^E:4.6e-256^RecName: Full=Dolichyl-diphosphooligosaccharide--protein glycosyltransferase subunit stt3	PF02516.13^STT3^Oligosaccharyl transferase STT3 subunit^23-535^E:1.2e-138	.	KEGG:spo:SPBC1271.02`KO:K07151	GO:0005783^cellular_component^endoplasmic reticulum`GO:0016021^cellular_component^integral component of membrane`GO:0008250^cellular_component^oligosaccharyltransferase complex`GO:0004576^molecular_function^oligosaccharyl transferase activity`GO:0043687^biological_process^post-translational protein modification`GO:0006487^biological_process^protein N-linked glycosylation`GO:0018279^biological_pro…	GO:0004576^molecular_function^oligosaccharyl transferase activity`GO:0006486^biological_process^protein glycosylation`GO:0016020^cellular_component^membrane
AA1	Lignin Oxidase	multicopper oxidase	LE01Gene07758	13.1973	13.3113	12.7271	11.5686	11.8477	11.551	-1.43782	3.13e-09	2.55e-08	LE01Gene07758	LAC2_TRAVE^LAC2_TRAVE^Q:969-2477,H:27-515^56.8%ID^E:3e-164^RecName: Full=Laccase-2	PF07732.14^Cu-oxidase_3^Multicopper oxidase^78-180^E:1.1e-33`PF00394.21^Cu-oxidase^Multicopper oxidase^193-339^E:2.2e-42`PF07731.13^Cu-oxidase_2^Multicopper oxidase^408-531^E:8.6e-38	.	.	GO:0005576^cellular_component^extracellular region`GO:0005507^molecular_function^copper ion binding`GO:0052716^molecular_function^hydroquinone:oxygen oxidoreductase activity`GO:0046274^biological_process^lignin catabolic process	GO:0005507^molecular_function^copper ion binding`GO:0055114^biological_process^oxidation-reduction process`GO:0016491^molecular_function^oxidoreductase activity
PL7	#N/A	#N/A	LE01Gene12410	9.4198	10.1244	9.86102	8.08076	8.68854	8.18275	-1.48974	2.87e-09	2.37e-08	LE01Gene12410	ALYA_KLEPN^ALYA_KLEPN^Q:199-915,H:12-307^25.6%ID^E:1.3e-07^RecName: Full=Alginate lyase	PF08787.10^Alginate_lyase2^Alginate lyase^43-257^E:4.6e-49	.	.	.	.
GH76	#N/A	#N/A	LE01Gene10275	10.09	10.0204	9.34772	8.32813	8.14868	8.29201	-1.60082	2.24e-06	1e-05	LE01Gene10275	.	.	.	.	.	.
GH37	#N/A	#N/A	LE01Gene01228	13.2509	13.4206	13.0255	11.3312	11.9948	11.4935	-1.60657	2.38e-10	2.4e-09	LE01Gene01228	TREB_EMENI^TREB_EMENI^Q:99-2294,H:29-748^54.9%ID^E:9e-236^RecName: Full=Neutral trehalase	PF07492.10^Trehalase_Ca-bi^Neutral trehalase Ca2+ binding domain^100-129^E:6.4e-15`PF01204.17^Trehalase^Trehalase^159-734^E:1.1e-167	.	KEGG:ani:AN5635.2`KO:K01194	GO:0005737^cellular_component^cytoplasm`GO:0004555^molecular_function^alpha,alpha-trehalase activity`GO:0005509^molecular_function^calcium ion binding`GO:0015927^molecular_function^trehalase activity`GO:0030437^biological_process^ascospore formation`GO:0034605^biological_process^cellular response to heat`GO:0009267^biological_process^cellular response to starvation`GO:1903134^biological_process^t…	GO:0004555^molecular_function^alpha,alpha-trehalase activity`GO:0005509^molecular_function^calcium ion binding`GO:0005993^biological_process^trehalose catabolic process`GO:0005737^cellular_component^cytoplasm`GO:0005991^biological_process^trehalose metabolic process
AA5	Lignin Degrading Auxiliary enzyme	Galactose oxidase	LE01Gene12661	13.1569	12.9437	12.552	11.2237	11.2558	11.4066	-1.6082	1.84e-11	2.28e-10	LE01Gene12661	GLOX_PHACH^GLOX_PHACH^Q:180-1985,H:3-553^31%ID^E:8.6e-66^RecName: Full=Aldehyde oxidase GLOX {ECO:0000305}	PF07250.10^Glyoxal_oxid_N^Glyoxal oxidase N-terminus^206-308^E:2e-14`PF09118.10^DUF1929^Domain of unknown function (DUF1929)^488-596^E:1.8e-24	.	.	GO:0005618^cellular_component^cell wall`GO:0005615^cellular_component^extracellular space`GO:0004031^molecular_function^aldehyde oxidase activity`GO:0102797^molecular_function^geranial:oxygen oxidoreductase activity`GO:0102798^molecular_function^heptaldehyde:oxygen oxidoreductase activity`GO:0050832^biological_process^defense response to fungus	.
GT21	#N/A	#N/A	LE01Gene00486	11.7004	12.1069	11.4963	10.0891	10.3024	10.0605	-1.63653	8.98e-16	2.47e-14	LE01Gene00486	CEGT_CRYNH^CEGT_CRYNH^Q:174-1385,H:16-442^43.1%ID^E:3.2e-88^RecName: Full=Ceramide glucosyltransferase {ECO:0000250|UniProtKB:Q16739}	PF00535.25^Glycos_transf_2^Glycosyl transferase family 2^75-238^E:7.4e-05`PF13641.5^Glyco_tranf_2_3^Glycosyltransferase like family 2^76-315^E:2.2e-16`PF13506.5^Glyco_transf_21^Glycosyl transferase family 21^116-243^E:2.2e-21`PF13632.5^Glyco_trans_2_3^Glycosyl transferase family group 2^152-368^E:2e-06	.	.	GO:0000139^cellular_component^Golgi membrane`GO:0016021^cellular_component^integral component of membrane`GO:0008120^molecular_function^ceramide glucosyltransferase activity`GO:0102769^molecular_function^dihydroceramide glucosyltransferase activity`GO:0006665^biological_process^sphingolipid metabolic process	GO:0016757^molecular_function^transferase activity, transferring glycosyl groups
CE4	#N/A	#N/A	LE01Gene11812	14.9705	14.9165	14.3131	13.1429	13.1927	12.9814	-1.65416	2.77e-15	6.91e-14	LE01Gene11812	CDA_AMYRO^CDA_AMYRO^Q:503-1291,H:67-352^34.1%ID^E:5.7e-38^RecName: Full=Chitin deacetylase	PF01522.20^Polysacc_deac_1^Polysaccharide deacetylase^251-361^E:9.5e-28	.	.	GO:0004099^molecular_function^chitin deacetylase activity`GO:0006032^biological_process^chitin catabolic process`GO:0000272^biological_process^polysaccharide catabolic process	GO:0016810^molecular_function^hydrolase activity, acting on carbon-nitrogen (but not peptide) bonds`GO:0005975^biological_process^carbohydrate metabolic process
GT69	#N/A	#N/A	LE01Gene09778	12.3993	12.4861	12.0362	10.4842	10.9277	10.4902	-1.67105	8.5e-11	9.29e-10	LE01Gene09778	.	.	.	.	.	.
GH152	#N/A	#N/A	LE01Gene10845	10.4235	10.3455	9.51314	8.987	8.06567	8.12977	-1.69305	0.000404567	0.00112695	LE01Gene10845	TLP_PRUAV^TLP_PRUAV^Q:81-860,H:1-245^38.2%ID^E:7.7e-38^RecName: Full=Glucan endo-1,3-beta-glucosidase	.	.	.	.	.
AA9	Cellulase	Endo-beta-1,4-glucanase	LE01Gene14047	13.4287	13.4935	13.1611	11.5136	11.6087	11.7194	-1.75207	1.55e-17	5.85e-16	LE01Gene14047	GUN4_HYPJE^GUN4_HYPJE^Q:313-1047,H:5-252^34.9%ID^E:2.8e-25^RecName: Full=Endoglucanase-4	.	.	.	.	.
GH23	#N/A	#N/A	LE01Gene01933	12.5819	13.455	11.9696	11.1922	10.742	11.086	-1.77977	4.02e-07	2.12e-06	LE01Gene01933	YJBJ_BACSU^YJBJ_BACSU^Q:944-1324,H:24-150^28.3%ID^E:3.3e-07^RecName: Full=Putative murein lytic transglycosylase YjbJ	PF01464.19^SLT^Transglycosylase SLT domain^184-269^E:2.3e-12	.	.	.	.
GH5	#N/A	#N/A	LE01Gene11040	13.1379	13.698	12.975	10.9834	12.0027	11.2978	-1.81212	0.000110722	0.000345924	LE01Gene11040	EXG_BLUGR^EXG_BLUGR^Q:152-1402,H:4-416^45.3%ID^E:1.9e-95^RecName: Full=Glucan 1,3-beta-glucosidase	PF00150.17^Cellulase^Cellulase (glycosyl hydrolase family 5)^78-212^E:8.3e-14	.	.	GO:0005576^cellular_component^extracellular region`GO:0004338^molecular_function^glucan exo-1,3-beta-glucosidase activity`GO:0005975^biological_process^carbohydrate metabolic process`GO:0071555^biological_process^cell wall organization	GO:0004553^molecular_function^hydrolase activity, hydrolyzing O-glycosyl compounds`GO:0005975^biological_process^carbohydrate metabolic process
AA7	#N/A	#N/A	LE01Gene02931	12.1897	11.4686	10.0363	9.85964	9.29073	9.53542	-1.89834	8.14e-07	4e-06	LE01Gene02931	CHG5_CHAGB^CHG5_CHAGB^Q:125-1756,H:60-608^39.7%ID^E:2.5e-107^RecName: Full=FAD-linked oxidoreductase CHGG_01242-2 {ECO:0000303|PubMed:23611317}	.	.	.	.	.
CBM1; GH5_5	Cellulase	Endo-beta-1,4-glucanase	LE01Gene12259	9.79345	9.10573	7.57174	7.71262	7.15847	6.15963	-1.94938	0.000185912	0.000553193	LE01Gene12259	EG5A_PHACH^EG5A_PHACH^Q:608-1594,H:22-276^48%ID^E:1.2e-80^RecName: Full=Manganese dependent endoglucanase Eg5A {ECO:0000303|PubMed:26173955}	.	.	.	.	.
CBM13	#N/A	#N/A	LE01Gene10858	14.5448	14.9532	14.5773	12.3629	12.7871	12.6993	-2.07646	7.38e-06	2.97e-05	LE01Gene10858	.	PF14200.5^RicinB_lectin_2^Ricin-type beta-trefoil lectin domain-like^46-116^E:9.8e-08	.	.	.	.
AA14	#N/A	#N/A	LE01Gene07498	13.8703	13.728	12.9561	11.2545	11.5644	11.5326	-2.11356	3.65e-21	2.81e-19	LE01Gene07498	.	.	.	.	.	.
AA3; AA8	Lignin Degrading Auxiliary enzyme	aryl-alcohol oxidase	LE01Gene09156	9.999	11.4053	10.3646	8.57486	8.50059	8.54474	-2.18082	1e-11	1.32e-10	LE01Gene09156	PDH1_AGACM^PDH1_AGACM^Q:146-1852,H:29-593^36.6%ID^E:2.7e-91^RecName: Full=Pyranose dehydrogenase {ECO:0000303|PubMed:24970179}	PF00732.18^GMC_oxred_N^GMC oxidoreductase^36-339^E:4.7e-64`PF05199.12^GMC_oxred_C^GMC oxidoreductase^444-588^E:8.3e-30	.	.	GO:0005576^cellular_component^extracellular region`GO:0050660^molecular_function^flavin adenine dinucleotide binding`GO:0033718^molecular_function^pyranose dehydrogenase (acceptor) activity`GO:0005975^biological_process^carbohydrate metabolic process	GO:0016614^molecular_function^oxidoreductase activity, acting on CH-OH group of donors`GO:0050660^molecular_function^flavin adenine dinucleotide binding`GO:0055114^biological_process^oxidation-reduction process
CE17	#N/A	#N/A	LE01Gene12021	11.9214	11.7751	11.5827	9.01609	9.91313	9.3457	-2.29424	3.43e-15	8.35e-14	LE01Gene12021	.	.	.	.	.	.
GH75	#N/A	#N/A	LE01Gene12054	11.1625	12.5332	11.8349	9.15334	10.1472	9.27203	-2.35576	2.64e-08	1.76e-07	LE01Gene12054	CSNC_ASPOZ^CSNC_ASPOZ^Q:353-961,H:42-247^49%ID^E:8.7e-48^RecName: Full=Endo-chitosanase C	PF07335.10^Glyco_hydro_75^Fungal chitosanase of glycosyl hydrolase group 75^177-291^E:1.7e-35	.	.	GO:0005576^cellular_component^extracellular region`GO:0016977^molecular_function^chitosanase activity`GO:0000272^biological_process^polysaccharide catabolic process	GO:0016977^molecular_function^chitosanase activity
GH13	#N/A	#N/A	LE01Gene12213	13.4589	13.5576	12.8353	10.9232	10.9551	10.6484	-2.46945	7.24e-26	9e-24	LE01Gene12213	AMYB_ASPAW^AMYB_ASPAW^Q:192-1664,H:15-498^46.6%ID^E:6.8e-118^RecName: Full=Alpha-amylase B	.	.	.	.	.
GT90	#N/A	#N/A	LE01Gene00533	9.79929	10.1244	9.09035	7.3046	7.45555	6.93041	-2.49374	2.15e-12	3.23e-11	LE01Gene00533	CXT1_CRYNJ^CXT1_CRYNJ^Q:328-1965,H:140-661^31.8%ID^E:1.6e-75^RecName: Full=Beta-1,2-xylosyltransferase 1	PF05686.11^Glyco_transf_90^Glycosyl transferase family 90^529-653^E:4.1e-19	ENOG4111KZD^Glycosyltransferase family 90 protein	KEGG:cne:CNL04750`KO:K11702	GO:0012505^cellular_component^endomembrane system`GO:0016021^cellular_component^integral component of membrane`GO:0046527^molecular_function^glucosyltransferase activity`GO:0035252^molecular_function^UDP-xylosyltransferase activity`GO:0045227^biological_process^capsule polysaccharide biosynthetic process`GO:0006688^biological_process^glycosphingolipid biosynthetic process`GO:0009405^biological_pr…	.
AA3	Lignin Degrading Auxiliary enzyme	alcohol oxidase	LE01Gene09192	10.4682	11.198	11.5193	8.05296	9.22475	7.78191	-2.63129	0.000386695	0.00108103	LE01Gene09192	ALOX_CANBO^ALOX_CANBO^Q:78-1772,H:4-604^40%ID^E:6.1e-119^RecName: Full=Alcohol oxidase	.	.	.	.	.
GH26	#N/A	#N/A	LE01Gene13721	9.51692	10.8155	10.7085	7.40478	7.96688	7.63755	-2.77119	4.39e-13	7.39e-12	LE01Gene13721	.	PF02156.14^Glyco_hydro_26^Glycosyl hydrolase family 26^152-276^E:2.8e-06	.	.	.	GO:0004553^molecular_function^hydrolase activity, hydrolyzing O-glycosyl compounds
AA2	Lignin Oxidase	Other peroxidase	LE01Gene03920	15.0171	15.2937	15.0177	11.9675	12.6636	12.0256	-2.86084	3.82e-11	4.48e-10	LE01Gene03920	CCPR_CRYNB^CCPR_CRYNB^Q:116-1207,H:3-377^57.6%ID^E:2.9e-119^RecName: Full=Cytochrome c peroxidase, mitochondrial	PF00141.22^peroxidase^Peroxidase^110-332^E:3.1e-47	COG0376^Bifunctional enzyme with both catalase and broad- spectrum peroxidase activity (By similarity)	KEGG:cnb:CNBD3710`KO:K00428	GO:0005759^cellular_component^mitochondrial matrix`GO:0004130^molecular_function^cytochrome-c peroxidase activity`GO:0020037^molecular_function^heme binding`GO:0046872^molecular_function^metal ion binding`GO:0006979^biological_process^response to oxidative stress	GO:0004601^molecular_function^peroxidase activity`GO:0020037^molecular_function^heme binding`GO:0006979^biological_process^response to oxidative stress`GO:0055114^biological_process^oxidation-reduction process
AA3	Lignin Degrading Auxiliary enzyme	aryl-alcohol oxidase	LE01Gene09147	11.0561	11.9141	11.4284	8.39167	8.84606	8.40983	-2.94718	4.34e-27	6.5e-25	LE01Gene09147	PDH1_LEUMG^PDH1_LEUMG^Q:97-1848,H:17-597^39.7%ID^E:1.2e-102^RecName: Full=Pyranose dehydrogenase 1 {ECO:0000303|PubMed:18097667}	PF00732.18^GMC_oxred_N^GMC oxidoreductase^61-363^E:6.8e-66`PF05199.12^GMC_oxred_C^GMC oxidoreductase^467-611^E:7.5e-34	.	.	GO:0005576^cellular_component^extracellular region`GO:0050660^molecular_function^flavin adenine dinucleotide binding`GO:0033718^molecular_function^pyranose dehydrogenase (acceptor) activity`GO:0005975^biological_process^carbohydrate metabolic process	GO:0016614^molecular_function^oxidoreductase activity, acting on CH-OH group of donors`GO:0050660^molecular_function^flavin adenine dinucleotide binding`GO:0055114^biological_process^oxidation-reduction process
AA7	#N/A	#N/A	LE01Gene13975	13.7608	13.9452	12.8016	10.7906	9.79382	10.8368	-3.03625	2.52e-08	1.68e-07	LE01Gene13975	A2372_ARTBC^A2372_ARTBC^Q:1183-2478,H:53-499^29.3%ID^E:1.5e-41^RecName: Full=Uncharacterized FAD-linked oxidoreductase ARB_02372 {ECO:0000305}	.	.	.	.	.
CBM50	#N/A	#N/A	LE01Gene04605	11.8479	12.1187	11.7483	8.53924	8.76172	8.7048	-3.24504	4.72e-17	1.65e-15	LE01Gene04605	.	PF01476.19^LysM^LysM domain^32-77^E:5.8e-12`PF01476.19^LysM^LysM domain^82-122^E:1.4e-07	.	.	.	.
CE4	#N/A	#N/A	LE01Gene03495	9.91273	10.9453	10.0974	6.58617	7.48591	7.16873	-3.27396	1.21e-12	1.88e-11	LE01Gene03495	CDA_AMYRO^CDA_AMYRO^Q:391-1293,H:52-358^43.4%ID^E:2.4e-70^RecName: Full=Chitin deacetylase	PF01522.20^Polysacc_deac_1^Polysaccharide deacetylase^142-256^E:1.7e-25	.	.	GO:0004099^molecular_function^chitin deacetylase activity`GO:0006032^biological_process^chitin catabolic process`GO:0000272^biological_process^polysaccharide catabolic process	GO:0016810^molecular_function^hydrolase activity, acting on carbon-nitrogen (but not peptide) bonds`GO:0005975^biological_process^carbohydrate metabolic process
CE4	#N/A	#N/A	LE01Gene01633	13.7445	13.7733	12.6719	9.72341	9.44358	9.41377	-3.94704	1.39e-37	6.78e-35	LE01Gene01633	CDA_CRYNH^CDA_CRYNH^Q:147-1112,H:25-337^46.2%ID^E:8.4e-73^RecName: Full=Chitin deacetylase	.	.	.	.	.
AA7	#N/A	#N/A	LE01Gene09065	11.4125	12.2068	11.0027	5.97749	5.22491	6.32302	-5.74272	4.97e-11	5.68e-10	LE01Gene09065	SORD_PENRW^SORD_PENRW^Q:163-1560,H:17-467^29.4%ID^E:5.1e-44^RecName: Full=FAD-linked oxidoreductase sorD {ECO:0000303|PubMed:28618182}	.	.	.	.	.

## Sheet: cs_3-VS-cs_1 
CAZyme_family	Class	Gene name	Gene_id	cs_1_a	cs_1_b	cs_1_c	cs_3_a	cs_3_b	cs_3_c	log2FoldChange	pvalue	padj	id	sprot_Top_BLASTX_hit	Pfam	eggnog	Kegg	gene_ontology_blast	gene_ontology_pfam
GH15	#N/A	#N/A	LE01Gene04370	0	0	0	6.8761	5.93848	8.24039	9.87581	0.000139235	0.00036514	LE01Gene04370	AMYG_SCHCM^AMYG_SCHCM^Q:43-1227,H:18-496^48.1%ID^E:6.2e-102^RecName: Full=Glucoamylase ARB_02327-1 {ECO:0000305}	PF00723.20^Glyco_hydro_15^Glycosyl hydrolases family 15^153-362^E:3.9e-29	COG3387^glycoside hydrolase 15-related	KEGG:scm:SCHCODRAFT_57589`KO:K01178	GO:0005576^cellular_component^extracellular region`GO:0004339^molecular_function^glucan 1,4-alpha-glucosidase activity`GO:2001070^molecular_function^starch binding`GO:0000272^biological_process^polysaccharide catabolic process	.
AA9	Cellulase	Endo-beta-1,4-glucanase	LE01Gene10266	5.52341	5.29729	4.7266	15.6152	13.4284	12.9008	9.30595	1.87e-10	1.32e-09	LE01Gene10266	EGLD_NEOFI^EGLD_NEOFI^Q:62-841,H:2-234^31.9%ID^E:2.8e-20^RecName: Full=Probable endo-beta-1,4-glucanase D	PF03443.13^Glyco_hydro_61^Glycosyl hydrolase family 61^23-219^E:1.5e-52	.	KEGG:nfi:NFIA_099510`KO:K19356	GO:0005576^cellular_component^extracellular region`GO:0008810^molecular_function^cellulase activity`GO:0030248^molecular_function^cellulose binding`GO:0030245^biological_process^cellulose catabolic process	.
AA9; CBM1	Cellulase	Endo-beta-1,4-glucanase	LE01Gene09249	5.80462	6.06838	6.01546	15.1227	13.3097	13.5608	8.29258	1.87e-11	1.53e-10	LE01Gene09249	CEL1_AGABI^CEL1_AGABI^Q:47-976,H:18-320^62.6%ID^E:5.1e-106^RecName: Full=Cellulose-growth-specific protein	PF03443.13^Glyco_hydro_61^Glycosyl hydrolase family 61^19-235^E:6.5e-53`PF00734.17^CBM_1^Fungal cellulose binding domain^283-311^E:1.6e-11	.	.	GO:0005576^cellular_component^extracellular region`GO:0030248^molecular_function^cellulose binding`GO:0016798^molecular_function^hydrolase activity, acting on glycosyl bonds`GO:0030245^biological_process^cellulose catabolic process	GO:0030248^molecular_function^cellulose binding`GO:0005975^biological_process^carbohydrate metabolic process`GO:0005576^cellular_component^extracellular region
AA9; CBM1	Cellulase	Endo-beta-1,4-glucanase	LE01Gene05218	7.6751	7.27844	7.41136	15.9958	14.1393	13.3547	7.47695	1.41e-07	6.15e-07	LE01Gene05218	EGLD_ASPNC^EGLD_ASPNC^Q:82-765,H:6-232^47.5%ID^E:5.2e-48^RecName: Full=Probable endo-beta-1,4-glucanase D	.	.	.	.	.
AA1	Lignin Oxidase	multicopper oxidase	LE01Gene13044	5.43614	5.89341	6.59297	13.3788	14.4844	8.31871	7.43182	2.41e-13	2.62e-12	LE01Gene13044	LAC5_TRAVI^LAC5_TRAVI^Q:34-1602,H:6-527^62.2%ID^E:9e-182^RecName: Full=Laccase-5	.	.	.	.	.
CBM1; GH131	#N/A	#N/A	LE01Gene03370	6.76803	7.04718	5.56689	14.8877	13.3142	12.5624	7.34831	1.76e-07	7.52e-07	LE01Gene03370	CBHB_ASPFC^CBHB_ASPFC^Q:941-1039,H:501-532^69.7%ID^E:3.7e-06^RecName: Full=Probable 1,4-beta-D-glucan cellobiohydrolase B	PF00734.17^CBM_1^Fungal cellulose binding domain^313-341^E:5.2e-11	.	.	GO:0005576^cellular_component^extracellular region`GO:0016162^molecular_function^cellulose 1,4-beta-cellobiosidase activity`GO:0030248^molecular_function^cellulose binding`GO:0030245^biological_process^cellulose catabolic process	GO:0030248^molecular_function^cellulose binding`GO:0005975^biological_process^carbohydrate metabolic process`GO:0005576^cellular_component^extracellular region
GH12	Cellulase	Endo-beta-1,4-glucanase	LE01Gene13789	4.10419	3.26643	3.19985	9.94738	7.96344	12.0142	7.34493	4.29e-16	6.95e-15	LE01Gene13789	XGEA_ASPNC^XGEA_ASPNC^Q:92-817,H:4-240^44.7%ID^E:1.6e-47^RecName: Full=Probable xyloglucan-specific endo-beta-1,4-glucanase A	PF01670.15^Glyco_hydro_12^Glycosyl hydrolase family 12^64-273^E:3.2e-38	.	KEGG:ang:ANI_1_432014`KO:K18576	GO:0005576^cellular_component^extracellular region`GO:0008810^molecular_function^cellulase activity`GO:0033946^molecular_function^xyloglucan-specific endo-beta-1,4-glucanase activity`GO:0071555^biological_process^cell wall organization`GO:0000272^biological_process^polysaccharide catabolic process	GO:0008810^molecular_function^cellulase activity`GO:0000272^biological_process^polysaccharide catabolic process
CBM1; GH5	#N/A	#N/A	LE01Gene11268	7.00883	7.02613	7.21331	14.3076	12.3657	13.4386	6.50161	1.3e-07	5.7e-07	LE01Gene11268	MANF_EMENI^MANF_EMENI^Q:1-1323,H:1-433^41.8%ID^E:3.5e-67^RecName: Full=Probable mannan endo-1,4-beta-mannosidase F	PF00734.17^CBM_1^Fungal cellulose binding domain^25-52^E:6e-12`PF00150.17^Cellulase^Cellulase (glycosyl hydrolase family 5)^111-406^E:9.9e-28	.	KEGG:afv:AFLA_069870`KO:K19355	GO:0005576^cellular_component^extracellular region`GO:0030248^molecular_function^cellulose binding`GO:0016985^molecular_function^mannan endo-1,4-beta-mannosidase activity`GO:0005975^biological_process^carbohydrate metabolic process	GO:0030248^molecular_function^cellulose binding`GO:0005975^biological_process^carbohydrate metabolic process`GO:0005576^cellular_component^extracellular region`GO:0004553^molecular_function^hydrolase activity, hydrolyzing O-glycosyl compounds
CBM1; GH7	Cellulase	1,4-beta-cellobiosidase	LE01Gene12864	8.3159	8.34353	7.61256	14.4173	12.0215	15.3927	6.3677	5.51e-08	2.57e-07	LE01Gene12864	GUX2_AGABI^GUX2_AGABI^Q:837-2195,H:1-450^62.8%ID^E:2.7e-167^RecName: Full=Exoglucanase	PF00840.19^Glyco_hydro_7^Glycosyl hydrolase family 7^22-453^E:4.1e-200	.	.	GO:0005576^cellular_component^extracellular region`GO:0016162^molecular_function^cellulose 1,4-beta-cellobiosidase activity`GO:0030248^molecular_function^cellulose binding`GO:0030245^biological_process^cellulose catabolic process	GO:0004553^molecular_function^hydrolase activity, hydrolyzing O-glycosyl compounds`GO:0005975^biological_process^carbohydrate metabolic process
CBM1; CE1	Hemicellulase	acetylxylan esterase	LE01Gene12496	7.39559	7.39799	7.12202	14.2574	12.8716	13.0609	6.23369	2.63e-08	1.3e-07	LE01Gene12496	AXE1_NEOFI^AXE1_NEOFI^Q:623-1729,H:4-368^52.8%ID^E:3.4e-88^RecName: Full=Probable acetylxylan esterase A	.	.	.	.	.
AA9; CBM1	Cellulase	Endo-beta-1,4-glucanase	LE01Gene09248	6.77989	7.26052	6.68514	14.0395	12.943	11.136	6.2143	5.47e-07	2.16e-06	LE01Gene09248	CEL1_AGABI^CEL1_AGABI^Q:66-1061,H:18-319^55.1%ID^E:2.9e-93^RecName: Full=Cellulose-growth-specific protein	PF03443.13^Glyco_hydro_61^Glycosyl hydrolase family 61^19-127^E:1.1e-16`PF03443.13^Glyco_hydro_61^Glycosyl hydrolase family 61^147-256^E:7.6e-30`PF00734.17^CBM_1^Fungal cellulose binding domain^306-334^E:5.2e-13	.	.	GO:0005576^cellular_component^extracellular region`GO:0030248^molecular_function^cellulose binding`GO:0016798^molecular_function^hydrolase activity, acting on glycosyl bonds`GO:0030245^biological_process^cellulose catabolic process	GO:0030248^molecular_function^cellulose binding`GO:0005975^biological_process^carbohydrate metabolic process`GO:0005576^cellular_component^extracellular region
GH12	Cellulase	Endo-beta-1,4-glucanase	LE01Gene04541	6.79166	6.43075	7.09347	13.5451	12.0462	11.3704	5.8314	8.35e-07	3.2e-06	LE01Gene04541	XGEA_ASPAC^XGEA_ASPAC^Q:436-1227,H:3-237^40.1%ID^E:5.8e-42^RecName: Full=Xyloglucan-specific endo-beta-1,4-glucanase A	PF01670.15^Glyco_hydro_12^Glycosyl hydrolase family 12^36-265^E:7.4e-33	.	.	.	GO:0008810^molecular_function^cellulase activity`GO:0000272^biological_process^polysaccharide catabolic process
CBM20; GH15	#N/A	#N/A	LE01Gene04186	8.21901	8.50061	8.42632	14.7418	12.5254	14.4936	5.8149	2.13e-15	3.12e-14	LE01Gene04186	AMYG_SCHCM^AMYG_SCHCM^Q:909-2588,H:20-576^62.4%ID^E:4.7e-198^RecName: Full=Glucoamylase ARB_02327-1 {ECO:0000305}	.	.	.	.	.
CE16	#N/A	#N/A	LE01Gene11041	6.65663	7.4777	7.15002	13.7018	11.9333	11.7115	5.6215	4.87e-07	1.93e-06	LE01Gene11041	AES1_THIHE^AES1_THIHE^Q:871-1365,H:6-178^44.3%ID^E:8.9e-36^RecName: Full=Acetylesterase {ECO:0000303|PubMed:24140638}	.	.	.	.	.
GH47	#N/A	#N/A	LE01Gene07086	7.25818	7.03669	8.28618	13.2331	10.5803	13.8329	5.43882	1.62e-20	4.57e-19	LE01Gene07086	MNS1B_ASPPH^MNS1B_ASPPH^Q:190-1533,H:45-504^39.4%ID^E:1e-84^RecName: Full=Mannosyl-oligosaccharide alpha-1,2-mannosidase 1B	PF01532.19^Glyco_hydro_47^Glycosyl hydrolase family 47^47-494^E:4.7e-119	.	.	GO:0060205^cellular_component^cytoplasmic vesicle lumen`GO:0016020^cellular_component^membrane`GO:0005509^molecular_function^calcium ion binding`GO:0004571^molecular_function^mannosyl-oligosaccharide 1,2-alpha-mannosidase activity`GO:0005975^biological_process^carbohydrate metabolic process`GO:0006486^biological_process^protein glycosylation	GO:0004571^molecular_function^mannosyl-oligosaccharide 1,2-alpha-mannosidase activity`GO:0005509^molecular_function^calcium ion binding`GO:0016020^cellular_component^membrane
CBM1; CBM13; CBM2; GH74	#N/A	#N/A	LE01Gene07273	7.74333	7.56057	6.87604	13.5209	11.7181	12.4339	5.31864	1.74e-06	6.35e-06	LE01Gene07273	XG74_HYPJQ^XG74_HYPJQ^Q:329-2815,H:5-838^56.3%ID^E:2.7e-241^RecName: Full=Xyloglucanase {ECO:0000303|PubMed:15541296}	.	.	.	.	.
CE3	#N/A	#N/A	LE01Gene01029	8.01331	7.68669	8.0785	14.0345	11.7671	12.7405	5.21118	2.99e-09	1.72e-08	LE01Gene01029	CESA_RUMFL^CESA_RUMFL^Q:762-1313,H:40-250^25.2%ID^E:6.5e-05^RecName: Full=Multidomain esterase {ECO:0000303|PubMed:10846217}	.	.	.	.	.
AA3	Lignin Degrading Auxiliary enzyme	aryl-alcohol oxidase	LE01Gene04836	7.0486	6.72013	7.79502	12.6576	11.6729	12.6566	5.14561	1.9e-50	8.9e-48	LE01Gene04836	PDH1_AGABI^PDH1_AGABI^Q:934-2631,H:76-594^36%ID^E:1.5e-87^RecName: Full=Pyranose dehydrogenase {ECO:0000303|PubMed:11086703}	PF00732.18^GMC_oxred_N^GMC oxidoreductase^135-263^E:6.1e-24`PF05199.12^GMC_oxred_C^GMC oxidoreductase^363-504^E:2.3e-37	.	.	GO:0005576^cellular_component^extracellular region`GO:0050660^molecular_function^flavin adenine dinucleotide binding`GO:0033718^molecular_function^pyranose dehydrogenase (acceptor) activity`GO:0005975^biological_process^carbohydrate metabolic process	GO:0016614^molecular_function^oxidoreductase activity, acting on CH-OH group of donors`GO:0050660^molecular_function^flavin adenine dinucleotide binding`GO:0055114^biological_process^oxidation-reduction process
CBM1; GH3	Cellulase	beta-glucosidase	LE01Gene10634	6.54982	5.98355	5.91026	12.0812	10.3387	10.7231	5.09445	4e-07	1.61e-06	LE01Gene10634	BGLL_ASPFU^BGLL_ASPFU^Q:349-2367,H:25-728^45.2%ID^E:5.8e-168^RecName: Full=Probable beta-glucosidase L	PF00734.17^CBM_1^Fungal cellulose binding domain^24-49^E:8.5e-10`PF00933.20^Glyco_hydro_3^Glycosyl hydrolase family 3 N terminal domain^162-261^E:4.4e-15`PF00933.20^Glyco_hydro_3^Glycosyl hydrolase family 3 N terminal domain^272-362^E:7e-07`PF01915.21^Glyco_hydro_3_C^Glycosyl hydrolase family 3 C-terminal domain^409-663^E:2.8e-52`PF14310.5^Fn3-like^Fibronectin type III-like domain^716-785^E:3.4e-…	.	KEGG:afm:AFUA_7G06140`KO:K05349	GO:0005576^cellular_component^extracellular region`GO:0008422^molecular_function^beta-glucosidase activity`GO:0102483^molecular_function^scopolin beta-glucosidase activity`GO:0030245^biological_process^cellulose catabolic process	GO:0030248^molecular_function^cellulose binding`GO:0005975^biological_process^carbohydrate metabolic process`GO:0005576^cellular_component^extracellular region`GO:0004553^molecular_function^hydrolase activity, hydrolyzing O-glycosyl compounds
AA9	Cellulase	Endo-beta-1,4-glucanase	LE01Gene06603	9.30134	9.30462	8.83553	15.2202	13.3895	12.8284	5.0318	4.88e-07	1.94e-06	LE01Gene06603	EGLD_ASPNC^EGLD_ASPNC^Q:629-1339,H:8-235^45%ID^E:4.9e-43^RecName: Full=Probable endo-beta-1,4-glucanase D	PF03443.13^Glyco_hydro_61^Glycosyl hydrolase family 61^24-239^E:2.5e-66	ENOG410YBW9^endo-glucanase	KEGG:mtm:MYCTH_46583`KO:K19356	GO:0005576^cellular_component^extracellular region`GO:0030248^molecular_function^cellulose binding`GO:0016798^molecular_function^hydrolase activity, acting on glycosyl bonds`GO:0016491^molecular_function^oxidoreductase activity`GO:0030245^biological_process^cellulose catabolic process	.
AA3_4	Lignin Degrading Auxiliary enzyme	Pyranose oxidase	LE01Gene02678	11.0941	10.8171	11.6039	16.3982	14.9056	16.3369	4.81488	1.32e-19	3.35e-18	LE01Gene02678	P2OX_TRIMT^P2OX_TRIMT^Q:551-2125,H:33-548^57.9%ID^E:1.1e-173^RecName: Full=Pyranose 2-oxidase	PF00732.18^GMC_oxred_N^GMC oxidoreductase^297-373^E:3.7e-06`PF05199.12^GMC_oxred_C^GMC oxidoreductase^501-608^E:1.7e-10	.	.	GO:0050660^molecular_function^flavin adenine dinucleotide binding`GO:0050233^molecular_function^pyranose oxidase activity	GO:0016614^molecular_function^oxidoreductase activity, acting on CH-OH group of donors`GO:0050660^molecular_function^flavin adenine dinucleotide binding`GO:0055114^biological_process^oxidation-reduction process
AA3; AA8	Lignin Oxidase	Cellobiose dehydrogenase	LE01Gene04232	7.07773	7.33089	7.62591	13.038	11.4971	11.1617	4.79172	2.51e-05	7.57e-05	LE01Gene04232	CDH_PHACH^CDH_PHACH^Q:808-3114,H:1-773^64.6%ID^E:1e-281^RecName: Full=Cellobiose dehydrogenase	PF16010.4^CDH-cyt^Cytochrome domain of cellobiose dehydrogenase^24-196^E:2e-47`PF00732.18^GMC_oxred_N^GMC oxidoreductase^233-505^E:4e-19`PF00890.23^FAD_binding_2^FAD binding domain^234-273^E:7.7e-05`PF13450.5^NAD_binding_8^NAD(P)-binding Rossmann-like domain^237-264^E:0.00011`PF05199.12^GMC_oxred_C^GMC oxidoreductase^634-758^E:1.3e-15	COG2303^oxidoreductase	.	GO:0005576^cellular_component^extracellular region`GO:0047735^molecular_function^cellobiose dehydrogenase (acceptor) activity`GO:0050660^molecular_function^flavin adenine dinucleotide binding`GO:0046872^molecular_function^metal ion binding`GO:0030245^biological_process^cellulose catabolic process	GO:0016614^molecular_function^oxidoreductase activity, acting on CH-OH group of donors`GO:0050660^molecular_function^flavin adenine dinucleotide binding`GO:0055114^biological_process^oxidation-reduction process
GH127	#N/A	#N/A	LE01Gene05822	9.1102	8.84522	9.29017	14.5962	12.6823	13.2185	4.64309	6.18e-06	2.05e-05	LE01Gene05822	.	.	.	.	.	.
GH18	#N/A	#N/A	LE01Gene09723	7.47071	8.00452	7.75912	13.2496	11.0687	12.0356	4.6338	5.08e-15	7.04e-14	LE01Gene09723	CHI33_ARTBC^CHI33_ARTBC^Q:1119-1817,H:114-323^24.3%ID^E:6.7e-05^RecName: Full=Class III chitinase ARB_03514 {ECO:0000305}	.	.	.	.	.
CBM1; GH7	Cellulase	1,4-beta-cellobiosidase	LE01Gene04829	10.8514	10.2409	9.4526	15.7533	14.0925	14.3214	4.63288	2.37e-05	7.17e-05	LE01Gene04829	CBHB_ASPFC^CBHB_ASPFC^Q:119-1696,H:4-532^62.5%ID^E:2.1e-175^RecName: Full=Probable 1,4-beta-D-glucan cellobiohydrolase B	.	.	.	.	.
CBM1; GH10	Hemicellulase	Endo-1,4-beta-xylanase	LE01Gene03223	8.66838	7.77768	7.93569	13.3283	11.8426	12.4442	4.4914	4.93e-06	1.67e-05	LE01Gene03223	XYNC_PHACH^XYNC_PHACH^Q:360-1553,H:1-399^71.4%ID^E:1.2e-156^RecName: Full=Endo-1,4-beta-xylanase C	.	.	.	.	.
CBM1; GH7	Cellulase	1,4-beta-cellobiosidase	LE01Gene07961	8.04806	7.39799	7.12202	12.1728	9.93017	12.7067	4.42946	1.76e-08	8.98e-08	LE01Gene07961	GUX1_PHACH^GUX1_PHACH^Q:25-1383,H:1-446^63.4%ID^E:6.7e-164^RecName: Full=Exoglucanase 1	.	.	.	.	.
GH28	#N/A	#N/A	LE01Gene06973	7.73726	8.39781	7.79502	10.7339	8.63029	13.8201	4.42718	4.66e-06	1.58e-05	LE01Gene06973	PGLRA_ASPKW^PGLRA_ASPKW^Q:60-1187,H:10-367^36.3%ID^E:3.1e-46^RecName: Full=Probable endopolygalacturonase A	PF00295.16^Glyco_hydro_28^Glycosyl hydrolases family 28^73-383^E:2.9e-60	.	.	GO:0005576^cellular_component^extracellular region`GO:0004650^molecular_function^polygalacturonase activity`GO:0005975^biological_process^carbohydrate metabolic process`GO:0071555^biological_process^cell wall organization	GO:0004650^molecular_function^polygalacturonase activity`GO:0005975^biological_process^carbohydrate metabolic process
AA2	Lignin Oxidase	Manganese peroxidase	LE01Gene08997	9.48104	9.48903	9.1836	13.7817	10.7881	14.6136	4.34624	1.48e-08	7.66e-08	LE01Gene08997	PEM2_PHLRA^PEM2_PHLRA^Q:1487-2656,H:5-390^63.4%ID^E:1.1e-135^RecName: Full=Manganese peroxidase 2	PF00141.22^peroxidase^Peroxidase^174-407^E:8.9e-26`PF11895.7^Peroxidase_ext^Fungal peroxidase extension region^413-489^E:1.9e-29	.	KEGG:ag:CAC85963`KO:K20205	GO:0005576^cellular_component^extracellular region`GO:0020037^molecular_function^heme binding`GO:0016689^molecular_function^manganese peroxidase activity`GO:0046872^molecular_function^metal ion binding`GO:0042744^biological_process^hydrogen peroxide catabolic process`GO:0046274^biological_process^lignin catabolic process`GO:0006979^biological_process^response to oxidative stress	GO:0004601^molecular_function^peroxidase activity`GO:0020037^molecular_function^heme binding`GO:0006979^biological_process^response to oxidative stress`GO:0055114^biological_process^oxidation-reduction process
CBM20; CBM25; GH13	#N/A	#N/A	LE01Gene09188	8.55213	8.55307	8.83553	13.6645	11.6797	12.9008	4.31065	1.03e-30	9.75e-29	LE01Gene09188	AMY_STRLM^AMY_STRLM^Q:429-2096,H:29-565^45.6%ID^E:1.1e-129^RecName: Full=Alpha-amylase	.	.	.	.	.
CBM67	#N/A	#N/A	LE01Gene08448	10.7028	10.6525	12.3339	15.2902	16.2147	15.2275	4.19473	3.66e-22	1.3e-20	LE01Gene08448	.	.	.	.	.	.
AA7	#N/A	#N/A	LE01Gene10788	7.03876	7.23322	8.33171	11.9081	11.5685	11.9948	4.18807	4.35e-26	2.5e-24	LE01Gene10788	CHG5_CHAGB^CHG5_CHAGB^Q:740-2227,H:63-560^32.3%ID^E:1.5e-65^RecName: Full=FAD-linked oxidoreductase CHGG_01242-2 {ECO:0000303|PubMed:23611317}	.	.	.	.	.
CBM1; GH5	Cellulase	Endo-beta-1,4-glucanase	LE01Gene04104	8.89254	8.58582	8.70006	13.6515	12.3748	12.1988	4.1683	4.47e-05	0.000128713	LE01Gene04104	GUN2_HYPJE^GUN2_HYPJE^Q:490-1683,H:4-416^59.2%ID^E:5.9e-136^RecName: Full=Endoglucanase EG-II	PF00734.17^CBM_1^Fungal cellulose binding domain^25-53^E:1.4e-10`PF00150.17^Cellulase^Cellulase (glycosyl hydrolase family 5)^114-373^E:1e-50	COG2730^Glycoside hydrolase Family 5	.	GO:0005576^cellular_component^extracellular region`GO:0008810^molecular_function^cellulase activity`GO:0030248^molecular_function^cellulose binding`GO:0030245^biological_process^cellulose catabolic process	GO:0030248^molecular_function^cellulose binding`GO:0005975^biological_process^carbohydrate metabolic process`GO:0005576^cellular_component^extracellular region`GO:0004553^molecular_function^hydrolase activity, hydrolyzing O-glycosyl compounds
CBM1; GH10	Hemicellulase	Endo-1,4-beta-xylanase	LE01Gene07975	6.1353	6.56819	6.01546	10.9333	10.1899	9.61224	4.10476	5.37e-05	0.000152065	LE01Gene07975	XYNA_PHACH^XYNA_PHACH^Q:761-2023,H:1-402^64.6%ID^E:1.5e-137^RecName: Full=Endo-1,4-beta-xylanase A	.	.	.	.	.
AA3	Lignin Degrading Auxiliary enzyme	aryl-alcohol oxidase	LE01Gene04820	9.8759	10.1635	10.8889	14.5263	13.9724	14.6587	4.04148	1.27e-42	3.37e-40	LE01Gene04820	DTXS3_METRA^DTXS3_METRA^Q:2343-3371,H:20-369^54.3%ID^E:5.9e-102^RecName: Full=Aldo-keto reductase dtxS3 {ECO:0000305}	PF00732.18^GMC_oxred_N^GMC oxidoreductase^43-356^E:1.3e-55`PF05199.12^GMC_oxred_C^GMC oxidoreductase^464-604^E:4.4e-29`PF00248.20^Aldo_ket_red^Aldo/keto reductase family^642-952^E:7.4e-68	.	KEGG:maj:MAA_10045	GO:0016491^molecular_function^oxidoreductase activity	GO:0016614^molecular_function^oxidoreductase activity, acting on CH-OH group of donors`GO:0050660^molecular_function^flavin adenine dinucleotide binding`GO:0055114^biological_process^oxidation-reduction process
GH18	#N/A	#N/A	LE01Gene10302	7.76737	7.52349	8.51869	12.7593	11.1653	11.6004	4.00947	1.54e-11	1.28e-10	LE01Gene10302	CHI2_RHIOL^CHI2_RHIOL^Q:842-1675,H:58-304^46.8%ID^E:4.1e-62^RecName: Full=Chitinase 2	.	.	.	.	.
CBM12; CBM5	#N/A	#N/A	LE01Gene10124	5.52341	5.52448	6.38882	10.446	9.19879	9.62668	4.00248	0.000302434	0.000744056	LE01Gene10124	.	.	.	.	.	.
CE4	#N/A	#N/A	LE01Gene06517	8.20588	8.31777	8.05401	12.1976	10.9912	12.7897	3.97689	1.51e-26	9.22e-25	LE01Gene06517	PGDAE_HELPG^PGDAE_HELPG^Q:264-1118,H:2-285^60.7%ID^E:1.9e-104^RecName: Full=Peptidoglycan deacetylase	PF01522.20^Polysacc_deac_1^Polysaccharide deacetylase^43-147^E:1.3e-14	.	KEGG:hpg:HPG27_289`KO:K22278	GO:0046555^molecular_function^acetylxylan esterase activity`GO:0016810^molecular_function^hydrolase activity, acting on carbon-nitrogen (but not peptide) bonds`GO:0046872^molecular_function^metal ion binding`GO:0071555^biological_process^cell wall organization`GO:0045493^biological_process^xylan catabolic process	GO:0016810^molecular_function^hydrolase activity, acting on carbon-nitrogen (but not peptide) bonds`GO:0005975^biological_process^carbohydrate metabolic process
AA3	Lignin Degrading Auxiliary enzyme	glucose oxidase	LE01Gene07621	11.7454	10.9908	13.0193	16.2516	13.3931	16.8739	3.92332	8.01e-06	2.61e-05	LE01Gene07621	GOX_ASPNG^GOX_ASPNG^Q:307-2097,H:26-603^30.3%ID^E:1.4e-43^RecName: Full=Glucose oxidase	PF00732.18^GMC_oxred_N^GMC oxidoreductase^38-357^E:6.7e-45`PF05199.12^GMC_oxred_C^GMC oxidoreductase^466-607^E:5.5e-24	.	KEGG:ani:AN7998.2	GO:0050660^molecular_function^flavin adenine dinucleotide binding`GO:0016614^molecular_function^oxidoreductase activity, acting on CH-OH group of donors`GO:1900793^biological_process^shamixanthone biosynthetic process	GO:0016614^molecular_function^oxidoreductase activity, acting on CH-OH group of donors`GO:0050660^molecular_function^flavin adenine dinucleotide binding`GO:0055114^biological_process^oxidation-reduction process
CBM1; GH5	#N/A	#N/A	LE01Gene05890	9.7534	9.64563	8.95408	14.0511	12.2046	12.9379	3.77547	0.000171308	0.000440457	LE01Gene05890	MANF_EMENI^MANF_EMENI^Q:531-1856,H:1-433^44%ID^E:1.6e-83^RecName: Full=Probable mannan endo-1,4-beta-mannosidase F	PF00734.17^CBM_1^Fungal cellulose binding domain^26-53^E:1.9e-12`PF00150.17^Cellulase^Cellulase (glycosyl hydrolase family 5)^124-408^E:6.1e-28	.	KEGG:ani:AN9276.2`KO:K19355	GO:0005576^cellular_component^extracellular region`GO:0030248^molecular_function^cellulose binding`GO:0016985^molecular_function^mannan endo-1,4-beta-mannosidase activity`GO:0046355^biological_process^mannan catabolic process	GO:0030248^molecular_function^cellulose binding`GO:0005975^biological_process^carbohydrate metabolic process`GO:0005576^cellular_component^extracellular region`GO:0004553^molecular_function^hydrolase activity, hydrolyzing O-glycosyl compounds
CE16	#N/A	#N/A	LE01Gene12173	8.01331	7.50839	6.78375	11.5779	10.1731	11.4162	3.66392	0.000176701	0.000452615	LE01Gene12173	AES1_HYPJE^AES1_HYPJE^Q:885-1808,H:1-344^30.5%ID^E:1.1e-30^RecName: Full=Acetylesterase {ECO:0000303|Ref.2}	PF00657.21^Lipase_GDSL^GDSL-like Lipase/Acylhydrolase^31-296^E:6.9e-13	ENOG4111JEM^carbohydrate esterase family 16 protein	.	GO:0005576^cellular_component^extracellular region`GO:0008126^molecular_function^acetylesterase activity	GO:0016788^molecular_function^hydrolase activity, acting on ester bonds
GH18	#N/A	#N/A	LE01Gene10125	8.0627	6.52382	7.38804	11.8989	10.3433	10.5617	3.66073	5.69e-05	0.000160351	LE01Gene10125	CHI1_APHAL^CHI1_APHAL^Q:254-1294,H:31-379^45.6%ID^E:7.3e-89^RecName: Full=Chitinase 1	PF00704.27^Glyco_hydro_18^Glycosyl hydrolases family 18^59-396^E:2.5e-72	.	.	GO:0005576^cellular_component^extracellular region`GO:0008061^molecular_function^chitin binding`GO:0004568^molecular_function^chitinase activity`GO:0006032^biological_process^chitin catabolic process`GO:0000272^biological_process^polysaccharide catabolic process	GO:0005975^biological_process^carbohydrate metabolic process
AA9	Cellulase	Endo-beta-1,4-glucanase	LE01Gene02255	8.00322	7.61093	7.15923	12.1274	10.9726	9.91753	3.65309	0.00123072	0.00271324	LE01Gene02255	CEL1_AGABI^CEL1_AGABI^Q:10-732,H:17-254^50.6%ID^E:2.5e-66^RecName: Full=Cellulose-growth-specific protein	PF03443.13^Glyco_hydro_61^Glycosyl hydrolase family 61^23-236^E:4.4e-56	.	.	GO:0005576^cellular_component^extracellular region`GO:0030248^molecular_function^cellulose binding`GO:0016798^molecular_function^hydrolase activity, acting on glycosyl bonds`GO:0030245^biological_process^cellulose catabolic process	.
GH76	#N/A	#N/A	LE01Gene02160	7.97254	7.51596	8.0785	11.8013	9.69515	12.088	3.64029	4.22e-12	3.78e-11	LE01Gene02160	DCW1_YEAST^DCW1_YEAST^Q:47-1015,H:6-316^25.7%ID^E:5.5e-13^RecName: Full=Mannan endo-1,6-alpha-mannosidase DCW1	PF03663.13^Glyco_hydro_76^Glycosyl hydrolase family 76^50-214^E:4.6e-12`PF03663.13^Glyco_hydro_76^Glycosyl hydrolase family 76^234-390^E:9.2e-19	.	.	.	.
GH5	Cellulase	Endo-beta-1,4-glucanase	LE01Gene08136	8.48849	7.44634	7.24826	11.6428	9.87051	11.9976	3.58994	6.64e-05	0.000184591	LE01Gene08136	GUN_ROBSP^GUN_ROBSP^Q:604-1719,H:6-377^62.1%ID^E:1.5e-133^RecName: Full=Endoglucanase 1	.	.	.	.	.
CBM1; GH6	Cellulase	1,4-beta-cellobiosidase	LE01Gene10050	10.2165	10.563	10.3646	14.6269	13.5378	13.3505	3.56747	0.000295983	0.000729261	LE01Gene10050	GUX3_AGABI^GUX3_AGABI^Q:122-1432,H:7-438^70.5%ID^E:2.6e-162^RecName: Full=Exoglucanase 3	.	.	.	.	.
CBM1; CE15	#N/A	#N/A	LE01Gene11487	8.77891	8.97174	9.21707	12.6911	11.2311	12.736	3.36829	9.54e-16	1.47e-14	LE01Gene11487	GCE1_PHACR^GCE1_PHACR^Q:329-1732,H:1-472^66.7%ID^E:1e-169^RecName: Full=4-O-methyl-glucuronoyl methylesterase 1 {ECO:0000305}	PF00734.17^CBM_1^Fungal cellulose binding domain^24-52^E:2e-11	.	.	GO:0005576^cellular_component^extracellular region`GO:0052689^molecular_function^carboxylic ester hydrolase activity`GO:0030248^molecular_function^cellulose binding`GO:0005975^biological_process^carbohydrate metabolic process`GO:0046274^biological_process^lignin catabolic process	GO:0030248^molecular_function^cellulose binding`GO:0005975^biological_process^carbohydrate metabolic process`GO:0005576^cellular_component^extracellular region
GT8	#N/A	#N/A	LE01Gene07316	7.61013	6.89291	7.67812	11.3176	9.83316	10.6949	3.30968	2.41e-19	5.94e-18	LE01Gene07316	Y258_HAEIN^Y258_HAEIN^Q:917-1591,H:46-274^25.2%ID^E:1.4e-12^RecName: Full=Putative glycosyltransferase HI_0258	PF13578.5^Methyltransf_24^Methyltransferase domain^67-224^E:5.1e-14`PF01501.19^Glyco_transf_8^Glycosyl transferase family 8^300-532^E:3.1e-27	.	.	.	GO:0016757^molecular_function^transferase activity, transferring glycosyl groups
GH28	#N/A	#N/A	LE01Gene08820	8.36398	7.97186	7.98833	12.5225	10.249	9.95725	3.28269	0.00216615	0.00456544	LE01Gene08820	XGHA_ASPOR^XGHA_ASPOR^Q:126-1238,H:34-406^48.1%ID^E:5.1e-97^RecName: Full=Probable endo-xylogalacturonan hydrolase A	PF00295.16^Glyco_hydro_28^Glycosyl hydrolases family 28^60-388^E:9.5e-52	.	KEGG:aor:AO090102000011`KO:K01213	GO:0005576^cellular_component^extracellular region`GO:0004650^molecular_function^polygalacturonase activity`GO:0071555^biological_process^cell wall organization`GO:0000272^biological_process^polysaccharide catabolic process	GO:0004650^molecular_function^polygalacturonase activity`GO:0005975^biological_process^carbohydrate metabolic process
CE16	#N/A	#N/A	LE01Gene11542	10.5536	9.79314	9.97887	13.9573	12.1339	13.5716	3.26159	1.15e-05	3.65e-05	LE01Gene11542	AES1_MYCTT^AES1_MYCTT^Q:88-930,H:31-300^36.2%ID^E:1.9e-43^RecName: Full=Acetylesterase {ECO:0000250|UniProtKB:T2FKR1}	PF00657.21^Lipase_GDSL^GDSL-like Lipase/Acylhydrolase^33-228^E:5.4e-06`PF13472.5^Lipase_GDSL_2^GDSL-like Lipase/Acylhydrolase family^35-222^E:4.2e-09	.	.	.	GO:0016788^molecular_function^hydrolase activity, acting on ester bonds
GH20	#N/A	#N/A	LE01Gene10240	9.4198	8.77123	10.3646	13.1627	11.4539	13.4607	3.25352	7.98e-14	9.42e-13	LE01Gene10240	HEXO2_ARATH^HEXO2_ARATH^Q:285-1994,H:8-571^34.7%ID^E:1.7e-83^RecName: Full=Beta-hexosaminidase 2	.	.	.	.	.
AA3	#N/A	#N/A	LE01Gene13764	7.21514	7.14808	8.37979	10.7391	10.9808	11.0891	3.25027	1.86e-18	4.01e-17	LE01Gene13764	BETA_PSE14^BETA_PSE14^Q:1352-3019,H:7-535^32.5%ID^E:5e-67^RecName: Full=Oxygen-dependent choline dehydrogenase {ECO:0000255|HAMAP-Rule:MF_00750}	.	.	.	.	.
GH92	#N/A	#N/A	LE01Gene04001	8.69368	8.68989	9.98666	12.4132	10.3329	13.2685	3.17522	3.38e-08	1.64e-07	LE01Gene04001	A7629_ARTBC^A7629_ARTBC^Q:873-3197,H:29-761^31.8%ID^E:5.7e-102^RecName: Full=Uncharacterized secreted glycosidase ARB_07629 {ECO:0000305}	PF07971.11^Glyco_hydro_92^Glycosyl hydrolase family 92^283-796^E:4.2e-127	COG3537^Alpha-1,2-mannosidase	KEGG:abe:ARB_07629	GO:0005576^cellular_component^extracellular region`GO:0030246^molecular_function^carbohydrate binding`GO:0016798^molecular_function^hydrolase activity, acting on glycosyl bonds`GO:0008152^biological_process^metabolic process	.
GH16_10	#N/A	#N/A	LE01Gene11778	8.27457	7.52349	7.84726	10.9466	9.27828	11.9004	3.15317	8.54e-08	3.84e-07	LE01Gene11778	E3GAL_FLAVE^E3GAL_FLAVE^Q:590-952,H:129-249^73.6%ID^E:1.4e-49^RecName: Full=Galactan endo-beta-1,3-galactanase	.	.	.	.	.
CBM35; GH43_24	#N/A	#N/A	LE01Gene00068	9.45538	9.52324	9.37565	12.9307	11.1382	13.0615	3.14799	3.12e-09	1.8e-08	LE01Gene00068	.	PF04616.13^Glyco_hydro_43^Glycosyl hydrolases family 43^60-244^E:2.3e-19	.	.	.	GO:0004553^molecular_function^hydrolase activity, hydrolyzing O-glycosyl compounds`GO:0005975^biological_process^carbohydrate metabolic process
GH27	#N/A	#N/A	LE01Gene05323	12.2838	12.2922	12.8718	16.0645	14.3132	15.8088	3.06383	2.72e-12	2.54e-11	LE01Gene05323	AGAL3_HYPJE^AGAL3_HYPJE^Q:49-1383,H:167-618^49.2%ID^E:1.2e-117^RecName: Full=Alpha-galactosidase 3	PF16499.4^Melibiase_2^Alpha galactosidase A^36-124^E:1.3e-08`PF16499.4^Melibiase_2^Alpha galactosidase A^151-352^E:1.8e-08	ENOG410Y110^glycoside hydrolase family 27	.	GO:0005576^cellular_component^extracellular region`GO:0004557^molecular_function^alpha-galactosidase activity`GO:0052692^molecular_function^raffinose alpha-galactosidase activity`GO:0005975^biological_process^carbohydrate metabolic process	GO:0004553^molecular_function^hydrolase activity, hydrolyzing O-glycosyl compounds`GO:0005975^biological_process^carbohydrate metabolic process
GH16	#N/A	#N/A	LE01Gene05084	4.60866	6.00523	5.79678	7.65231	7.45734	9.59975	3.02602	8.66e-06	2.81e-05	LE01Gene05084	YHZ7_SCHPO^YHZ7_SCHPO^Q:319-1197,H:128-417^39.7%ID^E:1e-60^RecName: Full=Probable glycosidase C21B10.07	.	.	.	.	.
CBM51; GH35	#N/A	#N/A	LE01Gene04812	10.838	10.768	11.1358	14.2289	12.337	14.4236	2.99301	5.94e-14	7.19e-13	LE01Gene04812	BGALB_ASPNC^BGALB_ASPNC^Q:1131-4082,H:42-1012^36.4%ID^E:5.1e-164^RecName: Full=Probable beta-galactosidase B	.	.	.	.	.
GH43_24	#N/A	#N/A	LE01Gene10175	9.06728	8.7932	8.8555	12.4109	11.1835	11.6057	2.91784	6.09e-08	2.81e-07	LE01Gene10175	.	PF04616.13^Glyco_hydro_43^Glycosyl hydrolases family 43^101-296^E:8.8e-10	.	.	.	GO:0004553^molecular_function^hydrolase activity, hydrolyzing O-glycosyl compounds`GO:0005975^biological_process^carbohydrate metabolic process
GH18	#N/A	#N/A	LE01Gene09736	9.14501	8.7457	9.93395	12.463	11.8167	12.3716	2.88418	1.17e-10	8.51e-10	LE01Gene09736	.	PF00704.27^Glyco_hydro_18^Glycosyl hydrolases family 18^174-412^E:2.1e-13	.	.	.	GO:0005975^biological_process^carbohydrate metabolic process
CBM51; GH35	#N/A	#N/A	LE01Gene05202	6.69473	7.53844	7.36434	10.2443	9.13617	10.5596	2.86259	1.25e-09	7.68e-09	LE01Gene05202	BGALA_NEOFI^BGALA_NEOFI^Q:1-3021,H:1-979^34.4%ID^E:2.6e-152^RecName: Full=Probable beta-galactosidase A	PF01301.18^Glyco_hydro_35^Glycosyl hydrolases family 35^43-368^E:3.8e-78`PF10435.8^BetaGal_dom2^Beta-galactosidase, domain 2^407-533^E:1.1e-30`PF13363.5^BetaGal_dom3^Beta-galactosidase, domain 3^574-660^E:4.9e-18`PF13364.5^BetaGal_dom4_5^Beta-galactosidase jelly roll domain^697-786^E:5.7e-13`PF13364.5^BetaGal_dom4_5^Beta-galactosidase jelly roll domain^885-995^E:4e-31	.	KEGG:nfi:NFIA_011250	GO:0005576^cellular_component^extracellular region`GO:0004565^molecular_function^beta-galactosidase activity`GO:0000272^biological_process^polysaccharide catabolic process	.
GH28	#N/A	#N/A	LE01Gene02734	8.03327	7.76503	7.51546	11.4918	10.044	9.63487	2.8416	7.9e-07	3.03e-06	LE01Gene02734	RHGA_ASPAC^RHGA_ASPAC^Q:719-1714,H:41-370^30.2%ID^E:1.5e-30^RecName: Full=Rhamnogalacturonase A	.	.	.	.	.
GH16	#N/A	#N/A	LE01Gene04800	10.9623	10.7703	10.8468	12.3606	14.791	12.569	2.83001	5.77e-07	2.27e-06	LE01Gene04800	BGBP_PENMO^BGBP_PENMO^Q:1374-2483,H:31-360^36.2%ID^E:7.4e-58^RecName: Full=Beta-1,3-glucan-binding protein {ECO:0000312|EMBL:AAM21213.1}	.	.	.	.	.
GH53	#N/A	#N/A	LE01Gene05074	7.09682	6.46245	5.62123	9.81956	8.51195	9.28037	2.79821	4.91e-06	1.66e-05	LE01Gene05074	GANA_EMENI^GANA_EMENI^Q:374-1120,H:102-347^43.1%ID^E:9.8e-50^RecName: Full=Arabinogalactan endo-beta-1,4-galactanase A	PF07745.12^Glyco_hydro_53^Glycosyl hydrolase family 53^1-121^E:1.7e-24	.	KEGG:ani:AN5727.2`KO:K01224	GO:0005576^cellular_component^extracellular region`GO:0031218^molecular_function^arabinogalactan endo-1,4-beta-galactosidase activity`GO:0015926^molecular_function^glucosidase activity`GO:0071555^biological_process^cell wall organization`GO:0045490^biological_process^pectin catabolic process	GO:0015926^molecular_function^glucosidase activity
GH16	#N/A	#N/A	LE01Gene05083	8.71237	8.82098	9.67924	11.5859	12.4391	11.59	2.7935	1.82e-08	9.25e-08	LE01Gene05083	YHZ7_SCHPO^YHZ7_SCHPO^Q:102-995,H:126-417^44.7%ID^E:5.8e-63^RecName: Full=Probable glycosidase C21B10.07	PF00722.20^Glyco_hydro_16^Glycosyl hydrolases family 16^75-172^E:4.5e-07	.	KEGG:ang:ANI_1_2196024	GO:0031225^cellular_component^anchored component of membrane`GO:0005886^cellular_component^plasma membrane`GO:0052861^molecular_function^glucan endo-1,3-beta-glucanase activity, C-3 substituted reducing group`GO:0052862^molecular_function^glucan endo-1,4-beta-glucanase activity, C-3 substituted reducing group`GO:0030245^biological_process^cellulose catabolic process	GO:0004553^molecular_function^hydrolase activity, hydrolyzing O-glycosyl compounds`GO:0005975^biological_process^carbohydrate metabolic process
GH16	#N/A	#N/A	LE01Gene07068	9.808	9.63002	9.64194	11.67	13.2483	11.6176	2.69848	1.29e-08	6.7e-08	LE01Gene07068	YHZ7_SCHPO^YHZ7_SCHPO^Q:346-1248,H:126-417^36.4%ID^E:1.7e-48^RecName: Full=Probable glycosidase C21B10.07	.	.	KEGG:ang:ANI_1_2196024	GO:0031225^cellular_component^anchored component of membrane`GO:0005886^cellular_component^plasma membrane`GO:0052861^molecular_function^glucan endo-1,3-beta-glucanase activity, C-3 substituted reducing group`GO:0052862^molecular_function^glucan endo-1,4-beta-glucanase activity, C-3 substituted reducing group`GO:0030245^biological_process^cellulose catabolic process	.
CBM20; GH15	#N/A	#N/A	LE01Gene04190	10.7977	10.2489	10.2848	12.7744	11.4976	13.9848	2.62178	1.08e-08	5.73e-08	LE01Gene04190	AMYG_SCHCM^AMYG_SCHCM^Q:43-1725,H:18-576^62.7%ID^E:3.4e-199^RecName: Full=Glucoamylase ARB_02327-1 {ECO:0000305}	PF00723.20^Glyco_hydro_15^Glycosyl hydrolases family 15^34-447^E:1.5e-93`PF00686.18^CBM_20^Starch binding domain^481-569^E:1.6e-27	COG3387^glycoside hydrolase 15-related	KEGG:scm:SCHCODRAFT_57589`KO:K01178	GO:0005576^cellular_component^extracellular region`GO:0004339^molecular_function^glucan 1,4-alpha-glucosidase activity`GO:2001070^molecular_function^starch binding`GO:0000272^biological_process^polysaccharide catabolic process	GO:2001070^molecular_function^starch binding
AA7	#N/A	#N/A	LE01Gene05597	7.70651	7.96635	7.83006	9.86906	11.4683	8.77274	2.62048	1.95e-05	5.97e-05	LE01Gene05597	CHG5_CHAGB^CHG5_CHAGB^Q:602-2266,H:49-608^34.9%ID^E:4e-84^RecName: Full=FAD-linked oxidoreductase CHGG_01242-2 {ECO:0000303|PubMed:23611317}	PF01565.22^FAD_binding_4^FAD binding domain^121-263^E:1.7e-19`PF08031.11^BBE^Berberine and berberine like^509-542^E:5.6e-07	ENOG4110F4M^FAD binding domain-containing protein	KEGG:abe:ARB_07056	GO:0005576^cellular_component^extracellular region`GO:0071949^molecular_function^FAD binding`GO:0016491^molecular_function^oxidoreductase activity	GO:0016491^molecular_function^oxidoreductase activity`GO:0050660^molecular_function^flavin adenine dinucleotide binding`GO:0055114^biological_process^oxidation-reduction process
GH5	#N/A	#N/A	LE01Gene07930	11.5309	11.1348	11.2879	14.4976	13.1704	13.8104	2.59998	1.05e-06	3.93e-06	LE01Gene07930	XYL5_PHACH^XYL5_PHACH^Q:2368-3792,H:1-474^75.6%ID^E:2.2e-222^RecName: Full=Beta-xylosidase {ECO:0000303|PubMed:25300189}	.	.	.	.	.
GT20	#N/A	#N/A	LE01Gene13404	12.532	12.1461	12.3288	15.5029	14.4389	14.6004	2.58346	3.69e-08	1.78e-07	LE01Gene13404	TPS2_YEAST^TPS2_YEAST^Q:279-3200,H:26-848^32.7%ID^E:7.3e-129^RecName: Full=Trehalose-phosphatase	PF00982.20^Glyco_transf_20^Glycosyltransferase family 20^51-479^E:2e-123`PF00982.20^Glyco_transf_20^Glycosyltransferase family 20^592-646^E:5.8e-11`PF02358.15^Trehalose_PPase^Trehalose-phosphatase^711-930^E:6e-63	.	KEGG:sce:YDR074W`KO:K16055	GO:0005946^cellular_component^alpha,alpha-trehalose-phosphate synthase complex (UDP-forming)`GO:0004805^molecular_function^trehalose-phosphatase activity`GO:0034605^biological_process^cellular response to heat`GO:0005992^biological_process^trehalose biosynthetic process`GO:0070413^biological_process^trehalose metabolism in response to stress	GO:0003824^molecular_function^catalytic activity`GO:0005992^biological_process^trehalose biosynthetic process
GH71	#N/A	#N/A	LE01Gene04265	7.2834	7.12846	7.88662	10.323	8.67503	10.4766	2.5549	9.59e-09	5.12e-08	LE01Gene04265	AGN1_SCHPO^AGN1_SCHPO^Q:354-1562,H:24-422^35.6%ID^E:7e-59^RecName: Full=Glucan endo-1,3-alpha-glucosidase agn1	.	.	.	.	.
CBM12	#N/A	#N/A	LE01Gene01726	13.1389	12.6803	13.8257	16.1861	15.106	16.0322	2.55459	1.67e-09	1e-08	LE01Gene01726	DEAA_VIBAL^DEAA_VIBAL^Q:324-536,H:305-375^36.6%ID^E:9.6e-06^RecName: Full=Chitin disaccharide deacetylase	.	.	.	.	.
GH16_1	#N/A	#N/A	LE01Gene11400	8.25346	8.89543	9.05377	11.8271	10.3742	11.3425	2.52787	1.82e-09	1.09e-08	LE01Gene11400	YHZ7_SCHPO^YHZ7_SCHPO^Q:183-1094,H:126-417^33.4%ID^E:3.5e-42^RecName: Full=Probable glycosidase C21B10.07	.	.	KEGG:spo:SPBC21B10.07	GO:0009277^cellular_component^fungal-type cell wall`GO:0016021^cellular_component^integral component of membrane`GO:0004553^molecular_function^hydrolase activity, hydrolyzing O-glycosyl compounds`GO:0071966^biological_process^fungal-type cell wall polysaccharide metabolic process	.
GT1	#N/A	#N/A	LE01Gene13733	6.75607	7.4304	7.83581	10.0013	9.37637	10.1959	2.49836	3.93e-13	4.12e-12	LE01Gene13733	U72B3_ARATH^U72B3_ARATH^Q:1000-1743,H:205-439^27.6%ID^E:3.3e-14^RecName: Full=UDP-glycosyltransferase 72B3	PF00201.17^UDPGT^UDP-glucoronosyl and UDP-glucosyl transferase^310-436^E:2.5e-18	COG1819^Transferase	KEGG:ath:AT1G22370	GO:0043231^cellular_component^intracellular membrane-bounded organelle`GO:0015020^molecular_function^glucuronosyltransferase activity`GO:0080043^molecular_function^quercetin 3-O-glucosyltransferase activity`GO:0080044^molecular_function^quercetin 7-O-glucosyltransferase activity`GO:0008152^biological_process^metabolic process	GO:0016758^molecular_function^transferase activity, transferring hexosyl groups
GH13; GH152	#N/A	#N/A	LE01Gene12203	5.13735	4.64107	5.6991	6.52339	5.83713	8.79848	2.43788	0.000728678	0.00167006	LE01Gene12203	AMYB_ASPAW^AMYB_ASPAW^Q:1205-2719,H:3-498^44.5%ID^E:1.3e-116^RecName: Full=Alpha-amylase B	.	.	.	.	.
PL4	#N/A	#N/A	LE01Gene10811	9.39109	9.55667	10.2817	12.5933	11.7555	12.2091	2.42994	1.76e-16	3.02e-15	LE01Gene10811	RGLB_ASPFN^RGLB_ASPFN^Q:495-2417,H:14-662^43.1%ID^E:2.1e-144^RecName: Full=Probable rhamnogalacturonate lyase B	.	.	.	.	.
GH18	#N/A	#N/A	LE01Gene11646	10.916	10.2306	10.9272	13.5404	12.7864	13.0008	2.41979	2.14e-13	2.35e-12	LE01Gene11646	LACP_KLULA^LACP_KLULA^Q:210-1679,H:65-551^31.9%ID^E:9.4e-67^RecName: Full=Lactose permease	.	.	.	.	.
GH79	#N/A	#N/A	LE01Gene09636	9.665	9.51004	10.2732	12.1089	11.3548	12.7738	2.33827	6.92e-14	8.28e-13	LE01Gene09636	GUS79_ASPNC^GUS79_ASPNC^Q:1289-1939,H:317-540^30.6%ID^E:8e-17^RecName: Full=Beta-glucuronidase {ECO:0000303|PubMed:18377882}	.	.	.	.	.
GH78	#N/A	#N/A	LE01Gene11720	7.94646	7.85732	8.62558	10.4597	9.98599	10.931	2.32798	7.74e-12	6.65e-11	LE01Gene11720	.	PF17389.1^Bac_rhamnosid6H^Bacterial alpha-L-rhamnosidase 6 hairpin glycosidase domain^248-468^E:4.5e-17`PF01204.17^Trehalase^Trehalase^382-460^E:3.5e-07	.	.	.	GO:0004555^molecular_function^alpha,alpha-trehalase activity`GO:0005991^biological_process^trehalose metabolic process
GH76	#N/A	#N/A	LE01Gene07201	6.3091	5.86997	6.69784	8.37591	7.14384	9.49571	2.32095	9.58e-05	0.000259447	LE01Gene07201	YHG7_SCHPO^YHG7_SCHPO^Q:484-1116,H:134-353^29%ID^E:4.3e-15^RecName: Full=Putative mannan endo-1,6-alpha-mannosidase C1198.07c	.	.	.	.	.
GH128	#N/A	#N/A	LE01Gene09549	9.5116	9.5176	9.19931	10.7309	12.8254	10.2529	2.31298	3.18e-05	9.42e-05	LE01Gene09549	ASL1_SCHPO^ASL1_SCHPO^Q:766-1467,H:296-529^33.3%ID^E:8.5e-26^RecName: Full=Alkali-sensitive linkage protein 1	PF11790.7^Glyco_hydro_cc^Glycosyl hydrolase catalytic core^55-284^E:1.3e-65	.	KEGG:spo:SPAC13G6.10c	GO:0005783^cellular_component^endoplasmic reticulum`GO:0010339^cellular_component^external side of cell wall`GO:0005576^cellular_component^extracellular region`GO:0009277^cellular_component^fungal-type cell wall`GO:0005794^cellular_component^Golgi apparatus`GO:0004553^molecular_function^hydrolase activity, hydrolyzing O-glycosyl compounds`GO:0071966^biological_process^fungal-type cell wall polysa…	.
CBM67	#N/A	#N/A	LE01Gene11861	14.7801	14.1924	16.0141	17.2429	17.6376	17.5051	2.26961	2.88e-07	1.19e-06	LE01Gene11861	.	.	.	.	.	.
GH30_3	#N/A	#N/A	LE01Gene06426	10.3166	10.452	10.4877	13.1476	12.0624	12.6132	2.255	3.49e-17	6.55e-16	LE01Gene06426	NEG1_NEUCR^NEG1_NEUCR^Q:483-1625,H:46-416^33.5%ID^E:3.5e-39^RecName: Full=Endo-1,6-beta-D-glucanase	PF02055.15^Glyco_hydro_30^Glycosyl hydrolase family 30 TIM-barrel domain^68-365^E:1.5e-27`PF02057.14^Glyco_hydro_59^Glycosyl hydrolase family 59^96-331^E:2e-06	.	.	GO:0005576^cellular_component^extracellular region`GO:0005615^cellular_component^extracellular space`GO:0046557^molecular_function^glucan endo-1,6-beta-glucosidase activity`GO:0004348^molecular_function^glucosylceramidase activity`GO:0016798^molecular_function^hydrolase activity, acting on glycosyl bonds`GO:0005976^biological_process^polysaccharide metabolic process`GO:0006665^biological_process^…	GO:0004336^molecular_function^galactosylceramidase activity`GO:0006683^biological_process^galactosylceramide catabolic process
GH76	#N/A	#N/A	LE01Gene10232	7.83716	7.1383	8.34792	10.025	8.12267	10.9058	2.22438	3.44e-05	0.000101336	LE01Gene10232	.	.	.	.	.	.
GT1	#N/A	#N/A	LE01Gene13736	8.54172	8.47753	8.91654	10.0484	11.8479	9.76551	2.21465	1.16e-07	5.11e-07	LE01Gene13736	UFOG1_FRAAN^UFOG1_FRAAN^Q:772-1242,H:235-392^37.6%ID^E:8.2e-17^RecName: Full=Anthocyanidin 3-O-glucosyltransferase 1	PF00201.17^UDPGT^UDP-glucoronosyl and UDP-glucosyl transferase^297-426^E:4.1e-19	COG1819^Transferase	KEGG:ath:AT1G22340	GO:0043231^cellular_component^intracellular membrane-bounded organelle`GO:0015020^molecular_function^glucuronosyltransferase activity`GO:0080043^molecular_function^quercetin 3-O-glucosyltransferase activity`GO:0080044^molecular_function^quercetin 7-O-glucosyltransferase activity`GO:0008152^biological_process^metabolic process	GO:0016758^molecular_function^transferase activity, transferring hexosyl groups
PL14; PL36_2	#N/A	#N/A	LE01Gene02213	6.03986	6.9721	6.57931	8.87806	8.6787	8.78014	2.21428	6.97e-11	5.24e-10	LE01Gene02213	.	.	.	.	.	.
GH12	Cellulase	Endo-beta-1,4-glucanase	LE01Gene12233	6.79166	7.2054	7.08383	10.2357	8.37854	8.09368	2.20939	0.00260033	0.00538824	LE01Gene12233	XGEA_EMENI^XGEA_EMENI^Q:255-992,H:3-238^47%ID^E:9.2e-47^RecName: Full=Xyloglucan-specific endo-beta-1,4-glucanase A	PF01670.15^Glyco_hydro_12^Glycosyl hydrolase family 12^45-258^E:4.9e-32	.	KEGG:afm:AFUA_1G04730`KO:K18576	GO:0005576^cellular_component^extracellular region`GO:0008810^molecular_function^cellulase activity`GO:0033946^molecular_function^xyloglucan-specific endo-beta-1,4-glucanase activity`GO:0071555^biological_process^cell wall organization`GO:0000272^biological_process^polysaccharide catabolic process	GO:0008810^molecular_function^cellulase activity`GO:0000272^biological_process^polysaccharide catabolic process
AA5	Lignin Degrading Auxiliary enzyme	Glyoxal oxidase	LE01Gene02092	11.6701	11.4129	11.6815	13.7785	12.2087	14.5325	2.19663	9.05e-05	0.00024624	LE01Gene02092	GLOX_PHACH^GLOX_PHACH^Q:491-2146,H:3-556^59.3%ID^E:3.9e-190^RecName: Full=Aldehyde oxidase GLOX {ECO:0000305}	PF07250.10^Glyoxal_oxid_N^Glyoxal oxidase N-terminus^233-445^E:2.9e-30`PF09118.10^DUF1929^Domain of unknown function (DUF1929)^609-708^E:1.5e-22	.	KEGG:ag:AAA33747`KO:K20929	GO:0005615^cellular_component^extracellular space`GO:0004031^molecular_function^aldehyde oxidase activity`GO:0102797^molecular_function^geranial:oxygen oxidoreductase activity`GO:0102798^molecular_function^heptaldehyde:oxygen oxidoreductase activity`GO:0050665^biological_process^hydrogen peroxide biosynthetic process	.
GH16	#N/A	#N/A	LE01Gene09459	7.11567	6.75894	6.55159	9.07265	9.17563	8.59113	2.15005	6.15e-07	2.4e-06	LE01Gene09459	GUB_PAEPO^GUB_PAEPO^Q:889-1413,H:60-209^22.8%ID^E:2.7e-05^RecName: Full=Beta-glucanase	.	.	.	.	.
GH12	Cellulase	Endo-beta-1,4-glucanase	LE01Gene12231	8.28293	8.26483	7.89767	10.7493	9.48716	10.3543	2.13164	1.58e-05	4.91e-05	LE01Gene12231	XGEA_EMENI^XGEA_EMENI^Q:987-1613,H:21-239^39.2%ID^E:5e-30^RecName: Full=Xyloglucan-specific endo-beta-1,4-glucanase A	.	.	.	.	.
GH79	#N/A	#N/A	LE01Gene06732	9.53803	8.97724	10.0199	12.0869	10.7787	11.9042	2.12189	1.23e-08	6.41e-08	LE01Gene06732	GUS79_ASPNC^GUS79_ASPNC^Q:195-1805,H:43-541^30.6%ID^E:1e-48^RecName: Full=Beta-glucuronidase {ECO:0000303|PubMed:18377882}	PF16862.4^Glyco_hydro_79C^Glycosyl hydrolase family 79 C-terminal beta domain^298-418^E:3.9e-22	.	.	.	.
GH2	#N/A	#N/A	LE01Gene01683	11.3043	11.2658	11.4355	13.8421	12.8631	13.4584	2.10559	6.48e-15	8.92e-14	LE01Gene01683	MANBB_THIHE^MANBB_THIHE^Q:1673-4219,H:7-853^45.6%ID^E:1.1e-217^RecName: Full=Beta-mannosidase B	PF07690.15^MFS_1^Major Facilitator Superfamily^89-462^E:2.9e-34`PF00703.20^Glyco_hydro_2^Glycosyl hydrolases family 2^746-852^E:4.2e-08	COG3250^hydrolase family 2	.	GO:0005576^cellular_component^extracellular region`GO:0004567^molecular_function^beta-mannosidase activity`GO:0000272^biological_process^polysaccharide catabolic process	GO:0055085^biological_process^transmembrane transport`GO:0016021^cellular_component^integral component of membrane`GO:0004553^molecular_function^hydrolase activity, hydrolyzing O-glycosyl compounds`GO:0005975^biological_process^carbohydrate metabolic process
GH3	Hemicellulase	beta-xylosidase	LE01Gene05156	8.76405	9.13306	9.80783	11.2652	9.99484	12.1793	2.10284	3.03e-05	9.03e-05	LE01Gene05156	BXLB_ASPFC^BXLB_ASPFC^Q:161-2464,H:10-767^55.3%ID^E:1.5e-241^RecName: Full=Probable exo-1,4-beta-xylosidase bxlB	PF00933.20^Glyco_hydro_3^Glycosyl hydrolase family 3 N terminal domain^104-325^E:1.7e-24`PF01915.21^Glyco_hydro_3_C^Glycosyl hydrolase family 3 C-terminal domain^400-625^E:6e-43`PF14310.5^Fn3-like^Fibronectin type III-like domain^689-747^E:6.1e-09	.	.	GO:0005576^cellular_component^extracellular region`GO:0009044^molecular_function^xylan 1,4-beta-xylosidase activity`GO:0045493^biological_process^xylan catabolic process	GO:0004553^molecular_function^hydrolase activity, hydrolyzing O-glycosyl compounds`GO:0005975^biological_process^carbohydrate metabolic process
GH16_2	#N/A	#N/A	LE01Gene04938	8.89254	8.74247	9.11423	11.2466	10.8697	10.9134	2.09727	1.59e-29	1.31e-27	LE01Gene04938	KRE6_YEAST^KRE6_YEAST^Q:285-1847,H:211-711^40.4%ID^E:5.3e-100^RecName: Full=Beta-glucan synthesis-associated protein KRE6	.	.	.	.	.
GH106	#N/A	#N/A	LE01Gene12252	10.0217	9.50053	10.3304	11.8242	10.715	12.8693	2.0684	6.69e-07	2.59e-06	LE01Gene12252	.	PF17132.3^Glyco_hydro_106^alpha-L-rhamnosidase^208-715^E:4e-24	.	.	.	.
CBM1; GH10	Hemicellulase	Endo-1,4-beta-xylanase	LE01Gene02639	8.79068	8.55307	8.78584	10.7884	9.99924	11.2609	2.06047	1.59e-07	6.85e-07	LE01Gene02639	XYNA_PHACH^XYNA_PHACH^Q:177-1091,H:95-400^63.8%ID^E:5.4e-116^RecName: Full=Endo-1,4-beta-xylanase A	PF00331.19^Glyco_hydro_10^Glycosyl hydrolase family 10^45-347^E:1.6e-96	COG3693^hydrolase family 10	.	GO:0005576^cellular_component^extracellular region`GO:0030248^molecular_function^cellulose binding`GO:0031176^molecular_function^endo-1,4-beta-xylanase activity`GO:0045493^biological_process^xylan catabolic process	GO:0004553^molecular_function^hydrolase activity, hydrolyzing O-glycosyl compounds`GO:0005975^biological_process^carbohydrate metabolic process
GH17	#N/A	#N/A	LE01Gene06060	4.89709	5.02752	5.79678	7.46689	7.26586	7.24516	2.05912	2.84e-06	1e-05	LE01Gene06060	BTGC_ASPNC^BTGC_ASPNC^Q:462-1259,H:376-639^28.1%ID^E:7.2e-20^RecName: Full=Putative glucan endo-1,3-beta-glucosidase btgC	.	.	KEGG:ang:ANI_1_1742064	GO:0016021^cellular_component^integral component of membrane`GO:0005886^cellular_component^plasma membrane`GO:0042973^molecular_function^glucan endo-1,3-beta-D-glucosidase activity`GO:0071555^biological_process^cell wall organization`GO:0000272^biological_process^polysaccharide catabolic process	.
GH43	#N/A	#N/A	LE01Gene11715	9.8992	9.75525	10.1676	12.0194	11.7006	12.2433	2.05471	1.68e-26	1.01e-24	LE01Gene11715	ABNC_ASPNC^ABNC_ASPNC^Q:512-784,H:30-121^37.9%ID^E:0.00064^RecName: Full=Probable arabinan endo-1,5-alpha-L-arabinosidase C	PF04616.13^Glyco_hydro_43^Glycosyl hydrolases family 43^14-109^E:2.2e-07	.	.	.	GO:0004553^molecular_function^hydrolase activity, hydrolyzing O-glycosyl compounds`GO:0005975^biological_process^carbohydrate metabolic process
AA6	Lignin Degrading Auxiliary enzyme	Benzoquinone reductase	LE01Gene05328	9.22746	8.89833	9.32129	11.4851	10.411	11.4624	2.04009	0.000143744	0.000376205	LE01Gene05328	PST2_YEAST^PST2_YEAST^Q:126-716,H:2-197^62.9%ID^E:1.4e-70^RecName: Full=Protoplast secreted protein 2	PF03358.14^FMN_red^NADPH-dependent FMN reductase^56-183^E:1.4e-09`PF02525.16^Flavodoxin_2^Flavodoxin-like fold^56-173^E:8.7e-07	.	KEGG:sce:YDR032C	GO:0005576^cellular_component^extracellular region`GO:0010181^molecular_function^FMN binding`GO:0042802^molecular_function^identical protein binding`GO:0003955^molecular_function^NAD(P)H dehydrogenase (quinone) activity	GO:0016491^molecular_function^oxidoreductase activity
CE1	#N/A	#N/A	LE01Gene00476	10.5079	10.7196	11.415	13.1616	12.7976	12.9246	2.03483	1.99e-19	4.96e-18	LE01Gene00476	ESTD_PIG^ESTD_PIG^Q:47-907,H:3-282^49.1%ID^E:1.3e-69^RecName: Full=S-formylglutathione hydrolase	PF00756.19^Esterase^Putative esterase^33-284^E:2.4e-41	COG0627^esterase	KEGG:ssc:397127`KO:K01070	GO:0031410^cellular_component^cytoplasmic vesicle`GO:0052689^molecular_function^carboxylic ester hydrolase activity`GO:0042802^molecular_function^identical protein binding`GO:0018738^molecular_function^S-formylglutathione hydrolase activity`GO:0046294^biological_process^formaldehyde catabolic process	.
GH3	Cellulase	beta-glucosidase	LE01Gene11660	9.84659	8.98544	9.37169	11.8433	10.0581	11.8317	2.00586	0.0006077	0.00141414	LE01Gene11660	BGLI_ASPFC^BGLI_ASPFC^Q:254-2884,H:1-838^44.2%ID^E:9.2e-205^RecName: Full=Probable beta-glucosidase I	PF00933.20^Glyco_hydro_3^Glycosyl hydrolase family 3 N terminal domain^79-288^E:3.7e-43`PF01915.21^Glyco_hydro_3_C^Glycosyl hydrolase family 3 C-terminal domain^340-752^E:8.8e-58`PF07691.11^PA14^PA14 domain^480-586^E:1.1e-08`PF14310.5^Fn3-like^Fibronectin type III-like domain^787-857^E:2e-23	.	.	GO:0005576^cellular_component^extracellular region`GO:0008422^molecular_function^beta-glucosidase activity`GO:0102483^molecular_function^scopolin beta-glucosidase activity`GO:0030245^biological_process^cellulose catabolic process	GO:0004553^molecular_function^hydrolase activity, hydrolyzing O-glycosyl compounds`GO:0005975^biological_process^carbohydrate metabolic process
GH17	#N/A	#N/A	LE01Gene01277	8.6197	8.26033	7.49378	10.7122	9.70956	9.96051	1.99953	3.18e-06	1.11e-05	LE01Gene01277	BTGC_ASPNC^BTGC_ASPNC^Q:514-1458,H:363-678^35.1%ID^E:6.2e-45^RecName: Full=Putative glucan endo-1,3-beta-glucosidase btgC	PF00332.17^Glyco_hydro_17^Glycosyl hydrolases family 17^370-450^E:1.2e-08	.	KEGG:ang:ANI_1_1742064	GO:0016021^cellular_component^integral component of membrane`GO:0005886^cellular_component^plasma membrane`GO:0042973^molecular_function^glucan endo-1,3-beta-D-glucosidase activity`GO:0071555^biological_process^cell wall organization`GO:0000272^biological_process^polysaccharide catabolic process	GO:0004553^molecular_function^hydrolase activity, hydrolyzing O-glycosyl compounds`GO:0005975^biological_process^carbohydrate metabolic process
GH16_2	#N/A	#N/A	LE01Gene00492	11.3567	11.009	11.7025	13.2004	13.2356	13.516	1.94102	1.22e-20	3.48e-19	LE01Gene00492	SKN1_CANAX^SKN1_CANAX^Q:922-2463,H:246-736^41%ID^E:3.2e-103^RecName: Full=Beta-glucan synthesis-associated protein SKN1	.	.	.	.	.
GH2	#N/A	#N/A	LE01Gene01448	8.53473	8.22842	8.98549	10.605	10.4044	10.5988	1.92462	4.07e-15	5.71e-14	LE01Gene01448	MANBB_THIHE^MANBB_THIHE^Q:803-2902,H:171-853^39.9%ID^E:2.1e-143^RecName: Full=Beta-mannosidase B	.	.	.	.	.
AA1	Lignin Oxidase	multicopper oxidase	LE01Gene08330	8.87882	8.04172	8.23917	10.7247	10.2453	9.9959	1.9245	3.6e-09	2.05e-08	LE01Gene08330	LAC1_PHLRA^LAC1_PHLRA^Q:13-1587,H:8-515^65.9%ID^E:3.2e-199^RecName: Full=Laccase	.	.	.	.	.
GH51	#N/A	#N/A	LE01Gene09692	8.48124	7.82721	8.48245	9.93491	8.72198	11.0181	1.88613	0.00035165	0.000855418	LE01Gene09692	ABFA_ASPTN^ABFA_ASPTN^Q:362-2269,H:14-626^36.8%ID^E:9.8e-109^RecName: Full=Probable alpha-L-arabinofuranosidase A	.	.	.	.	.
GH3	Cellulase	beta-glucosidase	LE01Gene06170	9.34592	9.09818	9.0734	11.0844	10.5645	11.3543	1.86088	1.49e-11	1.23e-10	LE01Gene06170	BGLX_ECOLI^BGLX_ECOLI^Q:2529-4733,H:38-734^30.3%ID^E:7.6e-84^RecName: Full=Periplasmic beta-glucosidase	PF00933.20^Glyco_hydro_3^Glycosyl hydrolase family 3 N terminal domain^60-395^E:3.7e-51`PF01915.21^Glyco_hydro_3_C^Glycosyl hydrolase family 3 C-terminal domain^433-685^E:8.9e-48`PF14310.5^Fn3-like^Fibronectin type III-like domain^722-750^E:2.5e-07	COG1472^hydrolase family 3	KEGG:stm:STM2166`KO:K05349	GO:0042597^cellular_component^periplasmic space`GO:0005886^cellular_component^plasma membrane`GO:0008422^molecular_function^beta-glucosidase activity`GO:0102483^molecular_function^scopolin beta-glucosidase activity`GO:0009251^biological_process^glucan catabolic process	GO:0004553^molecular_function^hydrolase activity, hydrolyzing O-glycosyl compounds`GO:0005975^biological_process^carbohydrate metabolic process
GH5	#N/A	#N/A	LE01Gene07850	7.45599	7.08839	7.90864	9.11745	9.45331	9.52684	1.85865	2.7e-06	9.55e-06	LE01Gene07850	EXG3_SCHPO^EXG3_SCHPO^Q:109-1578,H:4-448^30%ID^E:1.6e-58^RecName: Full=Glucan 1,3-beta-glucosidase 3	PF00150.17^Cellulase^Cellulase (glycosyl hydrolase family 5)^111-391^E:3.3e-17	.	KEGG:spo:SPBC2D10.05	GO:1990819^cellular_component^actin fusion focus`GO:0009986^cellular_component^cell surface`GO:0005737^cellular_component^cytoplasm`GO:0005829^cellular_component^cytosol`GO:0005576^cellular_component^extracellular region`GO:0005634^cellular_component^nucleus`GO:0046557^molecular_function^glucan endo-1,6-beta-glucosidase activity`GO:0004338^molecular_function^glucan exo-1,3-beta-glucosidase activi…	GO:0004553^molecular_function^hydrolase activity, hydrolyzing O-glycosyl compounds`GO:0005975^biological_process^carbohydrate metabolic process
AA7	#N/A	#N/A	LE01Gene06745	6.4933	6.14851	6.25772	8.50678	7.48273	8.23502	1.84124	0.000146103	0.000381527	LE01Gene06745	PATO_ASPCL^PATO_ASPCL^Q:1087-2694,H:29-565^42%ID^E:5.9e-124^RecName: Full=FAD-linked oxidoreductase patO {ECO:0000303|PubMed:19383676}	PF01565.22^FAD_binding_4^FAD binding domain^127-267^E:4e-20`PF08031.11^BBE^Berberine and berberine like^512-548^E:5.6e-09	.	KEGG:act:ACLA_093700	GO:0071949^molecular_function^FAD binding`GO:0016491^molecular_function^oxidoreductase activity	GO:0016491^molecular_function^oxidoreductase activity`GO:0050660^molecular_function^flavin adenine dinucleotide binding`GO:0055114^biological_process^oxidation-reduction process
AA3; AA8	Lignin Degrading Auxiliary enzyme	aryl-alcohol oxidase	LE01Gene04010	8.00827	7.70667	7.02457	9.37374	8.67135	9.98953	1.8121	6.41e-07	2.5e-06	LE01Gene04010	PDH3_LEUMG^PDH3_LEUMG^Q:151-1818,H:41-599^40.5%ID^E:2e-110^RecName: Full=Pyranose dehydrogenase 3 {ECO:0000303|PubMed:18097667}	PF00732.18^GMC_oxred_N^GMC oxidoreductase^33-342^E:2.9e-66`PF05199.12^GMC_oxred_C^GMC oxidoreductase^445-580^E:2.4e-35	.	.	GO:0005576^cellular_component^extracellular region`GO:0050660^molecular_function^flavin adenine dinucleotide binding`GO:0033718^molecular_function^pyranose dehydrogenase (acceptor) activity`GO:0005975^biological_process^carbohydrate metabolic process	GO:0016614^molecular_function^oxidoreductase activity, acting on CH-OH group of donors`GO:0050660^molecular_function^flavin adenine dinucleotide binding`GO:0055114^biological_process^oxidation-reduction process
GH17	#N/A	#N/A	LE01Gene05973	8.26616	8.00452	9.42231	10.5277	9.23411	11.1474	1.79934	4.77e-05	0.000136658	LE01Gene05973	.	.	.	.	.	.
GH71	#N/A	#N/A	LE01Gene00554	5.91632	6.49346	6.53753	8.17861	7.64895	8.41693	1.78635	1.97e-07	8.37e-07	LE01Gene00554	AGN1_SCHPO^AGN1_SCHPO^Q:499-1722,H:11-420^35%ID^E:1.5e-59^RecName: Full=Glucan endo-1,3-alpha-glucosidase agn1	PF03659.13^Glyco_hydro_71^Glycosyl hydrolase family 71^135-504^E:1.1e-101	.	.	GO:1990819^cellular_component^actin fusion focus`GO:0005618^cellular_component^cell wall`GO:0005576^cellular_component^extracellular region`GO:0043332^cellular_component^mating projection tip`GO:0051118^molecular_function^glucan endo-1,3-alpha-glucosidase activity`GO:0007049^biological_process^cell cycle`GO:0030995^biological_process^cell septum edging catabolic process`GO:1904541^biological_proc…	GO:0016787^molecular_function^hydrolase activity
GH53	#N/A	#N/A	LE01Gene05090	9.11254	8.75212	9.01624	10.7421	9.39432	11.4227	1.77381	0.00172183	0.00368748	LE01Gene05090	GANA_EMENI^GANA_EMENI^Q:635-1579,H:7-322^47.2%ID^E:2.5e-75^RecName: Full=Arabinogalactan endo-beta-1,4-galactanase A	.	.	.	.	.
AA3	#N/A	#N/A	LE01Gene07753	10.745	10.6395	10.9762	11.3588	13.4836	11.9996	1.7715	0.000112339	0.000300538	LE01Gene07753	XPTC_EMENI^XPTC_EMENI^Q:103-1944,H:25-613^29.3%ID^E:1.5e-47^RecName: Full=Dehydrogenase xptC {ECO:0000303|PubMed:21351751}	PF05199.12^GMC_oxred_C^GMC oxidoreductase^63-204^E:3.9e-25	.	KEGG:ani:AN7998.2	GO:0050660^molecular_function^flavin adenine dinucleotide binding`GO:0016614^molecular_function^oxidoreductase activity, acting on CH-OH group of donors`GO:1900793^biological_process^shamixanthone biosynthetic process	GO:0016614^molecular_function^oxidoreductase activity, acting on CH-OH group of donors`GO:0055114^biological_process^oxidation-reduction process
GH27	#N/A	#N/A	LE01Gene06823	10.2154	10.0363	10.3119	12.0257	10.5059	12.6023	1.75511	3.55e-05	0.000104214	LE01Gene06823	AGALD_ASPOR^AGALD_ASPOR^Q:110-1675,H:24-656^38.2%ID^E:3.3e-99^RecName: Full=Probable alpha-galactosidase D	PF16499.4^Melibiase_2^Alpha galactosidase A^34-316^E:1.3e-52	.	KEGG:ang:ANI_1_276124`KO:K07407	GO:0005576^cellular_component^extracellular region`GO:0052692^molecular_function^raffinose alpha-galactosidase activity`GO:0000272^biological_process^polysaccharide catabolic process	GO:0004553^molecular_function^hydrolase activity, hydrolyzing O-glycosyl compounds`GO:0005975^biological_process^carbohydrate metabolic process
GH31	#N/A	#N/A	LE01Gene02438	11.0414	10.3306	10.8034	12.9013	11.7446	12.6106	1.74259	0.000162604	0.000420112	LE01Gene02438	XYLS_ECOLI^XYLS_ECOLI^Q:64-2370,H:1-729^46%ID^E:3.1e-206^RecName: Full=Alpha-xylosidase	PF13802.5^Gal_mutarotas_2^Galactose mutarotase-like^187-245^E:1.9e-16`PF01055.25^Glyco_hydro_31^Glycosyl hydrolases family 31^267-699^E:2e-119	COG1501^hydrolase, family 31	KEGG:ecj:JW3631`KEGG:eco:b3656`KO:K01811	GO:0061634^molecular_function^alpha-D-xyloside xylohydrolase`GO:0030246^molecular_function^carbohydrate binding`GO:0042802^molecular_function^identical protein binding`GO:0080176^molecular_function^xyloglucan 1,6-alpha-xylosidase activity`GO:0005975^biological_process^carbohydrate metabolic process	GO:0004553^molecular_function^hydrolase activity, hydrolyzing O-glycosyl compounds`GO:0005975^biological_process^carbohydrate metabolic process
AA5	Lignin Degrading Auxiliary enzyme	Glyoxal oxidase	LE01Gene04793	10.9707	11.4002	11.373	12.2847	13.7415	12.4043	1.71176	6.53e-05	0.00018185	LE01Gene04793	WSCD1_ARTBC^WSCD1_ARTBC^Q:2371-4941,H:63-924^52.3%ID^E:1.1e-269^RecName: Full=WSC domain-containing protein ARB_07867 {ECO:0000305}	.	.	.	.	.
CE9	#N/A	#N/A	LE01Gene02107	10.1311	9.89827	10.0161	12.1073	11.356	11.6197	1.71101	6.44e-11	4.88e-10	LE01Gene02107	NAGA_DROME^NAGA_DROME^Q:151-1701,H:20-409^33.7%ID^E:1.7e-68^RecName: Full=N-acetylglucosamine-6-phosphate deacetylase {ECO:0000250|UniProtKB:Q9Y303}	.	.	.	.	.
GH1	Cellulase	beta-glucosidase	LE01Gene06300	10.8758	10.416	11.8295	12.9501	12.2847	13.226	1.70778	1.45e-06	5.34e-06	LE01Gene06300	BGL06_ORYSJ^BGL06_ORYSJ^Q:496-1890,H:50-511^34%ID^E:2.1e-71^RecName: Full=Beta-glucosidase 6 {ECO:0000305}	PF00232.17^Glyco_hydro_1^Glycosyl hydrolase family 1^165-640^E:3.6e-103	COG2723^beta-glucosidase	KEGG:osa:4332041`KO:K01188	GO:0005576^cellular_component^extracellular region`GO:0033907^molecular_function^beta-D-fucosidase activity`GO:0004565^molecular_function^beta-galactosidase activity`GO:0080083^molecular_function^beta-gentiobiose beta-glucosidase activity`GO:0008422^molecular_function^beta-glucosidase activity`GO:0080079^molecular_function^cellobiose glucosidase activity`GO:0042973^molecular_function^glucan endo-…	GO:0004553^molecular_function^hydrolase activity, hydrolyzing O-glycosyl compounds`GO:0005975^biological_process^carbohydrate metabolic process
GT90	#N/A	#N/A	LE01Gene13995	10.3227	10.144	10.0499	11.3059	12.4969	11.4981	1.69111	2.47e-08	1.23e-07	LE01Gene13995	CXT1_CRYNJ^CXT1_CRYNJ^Q:1895-3436,H:152-661^33.9%ID^E:2.6e-81^RecName: Full=Beta-1,2-xylosyltransferase 1	.	.	.	.	.
GT20	#N/A	#N/A	LE01Gene12625	11.972	11.7245	12.8196	14.4074	13.5185	13.7116	1.68024	0.00177471	0.00379378	LE01Gene12625	TPS1_EMENI^TPS1_EMENI^Q:353-1888,H:2-484^63.5%ID^E:1.4e-195^RecName: Full=Alpha,alpha-trehalose-phosphate synthase [UDP-forming]	PF00982.20^Glyco_transf_20^Glycosyltransferase family 20^22-178^E:4.9e-44`PF00982.20^Glyco_transf_20^Glycosyltransferase family 20^200-513^E:9.9e-140	.	KEGG:ani:AN5523.2`KO:K00697	GO:0005946^cellular_component^alpha,alpha-trehalose-phosphate synthase complex (UDP-forming)`GO:0005737^cellular_component^cytoplasm`GO:0003825^molecular_function^alpha,alpha-trehalose-phosphate synthase (UDP-forming) activity`GO:0016791^molecular_function^phosphatase activity`GO:0030437^biological_process^ascospore formation`GO:0044262^biological_process^cellular carbohydrate metabolic process`G…	GO:0003824^molecular_function^catalytic activity`GO:0005992^biological_process^trehalose biosynthetic process
PL14; PL36_2	#N/A	#N/A	LE01Gene03031	8.26616	7.89846	8.12626	9.97198	9.59587	9.73347	1.67349	6.44e-16	1.02e-14	LE01Gene03031	.	.	.	.	.	.
AA1	Lignin Oxidase	multicopper oxidase	LE01Gene04648	8.29538	8.26483	8.71576	10.2842	9.83151	10.1538	1.6643	3.39e-06	1.18e-05	LE01Gene04648	LAC2_AGABI^LAC2_AGABI^Q:851-2422,H:1-520^43.8%ID^E:2.7e-124^RecName: Full=Laccase-2	.	.	.	.	.
GT15	#N/A	#N/A	LE01Gene02724	9.32177	9.62653	9.54687	11.2716	10.8225	11.3337	1.65713	8.16e-17	1.47e-15	LE01Gene02724	MNT2_CANAL^MNT2_CANAL^Q:1047-1922,H:137-429^53.9%ID^E:2.1e-99^RecName: Full=Glycolipid 2-alpha-mannosyltransferase 2	PF01793.15^Glyco_transf_15^Glycolipid 2-alpha-mannosyltransferase^45-266^E:6.1e-91	.	KEGG:cal:CAALFM_C301830CA`KO:K10967	GO:0000139^cellular_component^Golgi membrane`GO:0016021^cellular_component^integral component of membrane`GO:0000026^molecular_function^alpha-1,2-mannosyltransferase activity`GO:0043710^biological_process^cell adhesion involved in multi-species biofilm formation`GO:0098609^biological_process^cell-cell adhesion`GO:0007160^biological_process^cell-matrix adhesion`GO:0051834^biological_process^evasio…	GO:0000030^molecular_function^mannosyltransferase activity`GO:0006486^biological_process^protein glycosylation`GO:0016020^cellular_component^membrane
GH16	#N/A	#N/A	LE01Gene02697	11.745	11.6981	11.8982	13.2023	13.8555	13.121	1.64934	7.41e-11	5.55e-10	LE01Gene02697	BGBP_PENMO^BGBP_PENMO^Q:842-2017,H:31-360^34.1%ID^E:5.9e-55^RecName: Full=Beta-1,3-glucan-binding protein {ECO:0000312|EMBL:AAM21213.1}	.	.	.	.	.
AA7	#N/A	#N/A	LE01Gene08676	6.91513	6.79672	7.25687	9.08881	8.10097	8.57845	1.64863	3.21e-08	1.57e-07	LE01Gene08676	A7056_ARTBC^A7056_ARTBC^Q:156-1832,H:26-587^35.7%ID^E:1.5e-84^RecName: Full=Uncharacterized FAD-linked oxidoreductase ARB_02478 {ECO:0000305}	.	.	.	.	.
GH128	#N/A	#N/A	LE01Gene02985	8.7247	9.90405	9.50593	10.5074	11.914	10.2529	1.63365	0.00233591	0.00489236	LE01Gene02985	ASL1_SCHPO^ASL1_SCHPO^Q:195-884,H:296-529^35.1%ID^E:1.3e-25^RecName: Full=Alkali-sensitive linkage protein 1	PF11790.7^Glyco_hydro_cc^Glycosyl hydrolase catalytic core^67-293^E:3.4e-65	.	.	.	.
GH16	#N/A	#N/A	LE01Gene06326	7.06809	7.32228	7.08383	8.89654	8.6787	8.72752	1.61474	1.1e-13	1.26e-12	LE01Gene06326	.	PF00722.20^Glyco_hydro_16^Glycosyl hydrolases family 16^159-306^E:5.9e-10	.	.	.	GO:0004553^molecular_function^hydrolase activity, hydrolyzing O-glycosyl compounds`GO:0005975^biological_process^carbohydrate metabolic process
GH43	#N/A	#N/A	LE01Gene09852	8.5659	8.27824	8.17703	9.98758	9.33282	10.3703	1.61071	6.93e-06	2.28e-05	LE01Gene09852	ABNA_ASPFN^ABNA_ASPFN^Q:528-1493,H:6-319^43.3%ID^E:1.4e-58^RecName: Full=Probable arabinan endo-1,5-alpha-L-arabinosidase A	PF04616.13^Glyco_hydro_43^Glycosyl hydrolases family 43^32-306^E:5.6e-24	.	KEGG:afv:AFLA_059500`KO:K06113	GO:0005576^cellular_component^extracellular region`GO:0046558^molecular_function^arabinan endo-1,5-alpha-L-arabinosidase activity`GO:0031222^biological_process^arabinan catabolic process`GO:0045493^biological_process^xylan catabolic process	GO:0004553^molecular_function^hydrolase activity, hydrolyzing O-glycosyl compounds`GO:0005975^biological_process^carbohydrate metabolic process
CBM50	#N/A	#N/A	LE01Gene13151	4.43947	5.82191	4.39346	6.73535	5.83713	7.05081	1.60909	0.000652956	0.00151103	LE01Gene13151	.	PF01476.19^LysM^LysM domain^132-171^E:9.9e-08`PF01476.19^LysM^LysM domain^181-226^E:4.5e-07	.	.	.	.
GH79	#N/A	#N/A	LE01Gene00946	7.59678	7.18654	8.45653	9.51918	8.09549	10.0942	1.60864	0.00107512	0.0023946	LE01Gene00946	GUS79_ASPNC^GUS79_ASPNC^Q:175-1743,H:31-541^26%ID^E:7e-26^RecName: Full=Beta-glucuronidase {ECO:0000303|PubMed:18377882}	.	.	.	.	.
GH28	#N/A	#N/A	LE01Gene03020	9.24682	9.09566	9.52387	11.156	9.77268	11.3431	1.60712	0.00225193	0.00473257	LE01Gene03020	PGLRX_COCCA^PGLRX_COCCA^Q:139-1359,H:3-426^42.5%ID^E:7.4e-84^RecName: Full=Exopolygalacturonase	PF00295.16^Glyco_hydro_28^Glycosyl hydrolases family 28^53-385^E:9.5e-69	.	.	GO:0005576^cellular_component^extracellular region`GO:0047911^molecular_function^galacturan 1,4-alpha-galacturonidase activity`GO:0004650^molecular_function^polygalacturonase activity`GO:0005975^biological_process^carbohydrate metabolic process`GO:0071555^biological_process^cell wall organization	GO:0004650^molecular_function^polygalacturonase activity`GO:0005975^biological_process^carbohydrate metabolic process
PL7	#N/A	#N/A	LE01Gene04142	9.76836	10.0701	9.85678	11.7029	11.5033	11.2328	1.58939	3.92e-06	1.35e-05	LE01Gene04142	ALYA_KLEPN^ALYA_KLEPN^Q:359-634,H:15-99^39.4%ID^E:3.1e-05^RecName: Full=Alginate lyase	PF08787.10^Alginate_lyase2^Alginate lyase^41-253^E:2.1e-42	.	.	.	.
GH28	#N/A	#N/A	LE01Gene13684	8.42946	8.17203	8.9829	10.5801	9.35361	10.2219	1.57083	7.33e-06	2.41e-05	LE01Gene13684	RGXB_ASPNC^RGXB_ASPNC^Q:38-1276,H:1-416^43.2%ID^E:2.1e-95^RecName: Full=Alpha-L-rhamnosidase rgxB	PF00295.16^Glyco_hydro_28^Glycosyl hydrolases family 28^133-418^E:2.2e-39	.	KEGG:ang:ANI_1_1122034	GO:0005576^cellular_component^extracellular region`GO:0030596^molecular_function^alpha-L-rhamnosidase activity`GO:0004650^molecular_function^polygalacturonase activity`GO:0071555^biological_process^cell wall organization`GO:0000272^biological_process^polysaccharide catabolic process	GO:0004650^molecular_function^polygalacturonase activity`GO:0005975^biological_process^carbohydrate metabolic process
GH105	#N/A	#N/A	LE01Gene10169	10.0066	9.93826	10.7616	12.0719	10.8713	12.2682	1.56929	1.36e-06	5.02e-06	LE01Gene10169	URHG1_BACSU^URHG1_BACSU^Q:513-1124,H:77-266^27.1%ID^E:1e-06^RecName: Full=Unsaturated rhamnogalacturonyl hydrolase YesR	PF07470.12^Glyco_hydro_88^Glycosyl Hydrolase Family 88^133-337^E:4.1e-14	.	.	.	.
GT49	#N/A	#N/A	LE01Gene03872	6.81491	6.41464	6.97326	8.64436	7.44877	8.56993	1.56886	3.7e-05	0.000108165	LE01Gene03872	GNT14_DICDI^GNT14_DICDI^Q:518-1357,H:348-620^27.1%ID^E:4.8e-17^RecName: Full=Glycosyltransferase-like protein gnt14	PF13896.5^Glyco_transf_49^Glycosyl-transferase for dystroglycan^130-198^E:9.4e-12`PF13896.5^Glyco_transf_49^Glycosyl-transferase for dystroglycan^201-406^E:1.6e-52	ENOG410XRNY^Glucoside xylosyltransferase	KEGG:ddi:DDB_G0274741	GO:0016021^cellular_component^integral component of membrane`GO:0016338^biological_process^calcium-independent cell-cell adhesion via plasma membrane cell-adhesion molecules`GO:0030587^biological_process^sorocarp development	.
GH55	#N/A	#N/A	LE01Gene12491	8.52066	8.37301	8.80651	10.2828	10.1079	10.0258	1.56661	2.5e-22	9.07e-21	LE01Gene12491	EXG1_COCCA^EXG1_COCCA^Q:45-2321,H:26-781^40.1%ID^E:2e-157^RecName: Full=Glucan 1,3-beta-glucosidase	PF12708.6^Pectate_lyase_3^Pectate lyase superfamily protein^60-287^E:7.3e-79`PF12708.6^Pectate_lyase_3^Pectate lyase superfamily protein^419-487^E:5.6e-12	.	.	GO:0004338^molecular_function^glucan exo-1,3-beta-glucosidase activity`GO:0071555^biological_process^cell wall organization`GO:0008152^biological_process^metabolic process	.
GH152	#N/A	#N/A	LE01Gene02946	8.62957	8.33499	9.00861	10.3975	9.72914	10.5003	1.56508	0.000276209	0.000683854	LE01Gene02946	PR5_ARATH^PR5_ARATH^Q:644-1357,H:23-239^40.1%ID^E:2.9e-32^RecName: Full=Pathogenesis-related protein 5	.	.	.	.	.
GH28	#N/A	#N/A	LE01Gene12986	9.82814	8.90122	10.6647	11.3135	10.9546	12.0483	1.54264	0.000150394	0.000391769	LE01Gene12986	RGXB_ASPNC^RGXB_ASPNC^Q:396-1595,H:33-417^51%ID^E:7.6e-110^RecName: Full=Alpha-L-rhamnosidase rgxB	PF00295.16^Glyco_hydro_28^Glycosyl hydrolases family 28^95-406^E:1.5e-38	.	KEGG:ang:ANI_1_1122034	GO:0005576^cellular_component^extracellular region`GO:0030596^molecular_function^alpha-L-rhamnosidase activity`GO:0004650^molecular_function^polygalacturonase activity`GO:0071555^biological_process^cell wall organization`GO:0000272^biological_process^polysaccharide catabolic process	GO:0004650^molecular_function^polygalacturonase activity`GO:0005975^biological_process^carbohydrate metabolic process
CBM51; GH35	#N/A	#N/A	LE01Gene08777	9.40839	9.69483	9.55212	11.2146	10.3594	11.4156	1.50845	1.83e-06	6.63e-06	LE01Gene08777	BGALC_ASPNC^BGALC_ASPNC^Q:562-3456,H:23-976^38.7%ID^E:1.6e-182^RecName: Full=Probable beta-galactosidase C	PF05871.11^ESCRT-II^ESCRT-II complex subunit^1-53^E:2.9e-11`PF01301.18^Glyco_hydro_35^Glycosyl hydrolases family 35^141-472^E:4.4e-75`PF10435.8^BetaGal_dom2^Beta-galactosidase, domain 2^490-664^E:2.6e-42`PF13363.5^BetaGal_dom3^Beta-galactosidase, domain 3^686-748^E:3.4e-21`PF13364.5^BetaGal_dom4_5^Beta-galactosidase jelly roll domain^780-895^E:1.1e-18`PF13364.5^BetaGal_dom4_5^Beta-galactosidase j…	.	.	GO:0005576^cellular_component^extracellular region`GO:0004565^molecular_function^beta-galactosidase activity`GO:0000272^biological_process^polysaccharide catabolic process	GO:0071985^biological_process^multivesicular body sorting pathway`GO:0000814^cellular_component^ESCRT II complex
GH39	#N/A	#N/A	LE01Gene06836	8.84815	9.2237	8.59875	10.7442	9.52431	10.6782	1.50153	0.000112652	0.000301309	LE01Gene06836	.	.	.	.	.	.
GH154	#N/A	#N/A	LE01Gene11296	9.82385	9.32416	9.83395	11.3905	10.9963	11.0506	1.478	4.14e-09	2.33e-08	LE01Gene11296	.	.	.	.	.	.
GH13; GT5	#N/A	#N/A	LE01Gene04657	12.0749	11.5353	12.75	13.5861	13.8733	13.5696	1.4777	4.3e-08	2.05e-07	LE01Gene04657	AGS1_SCHPO^AGS1_SCHPO^Q:129-7226,H:14-2410^41.6%ID^E:0^RecName: Full=Cell wall alpha-1,3-glucan synthase ags1	PF00128.23^Alpha-amylase^Alpha amylase, catalytic domain^103-358^E:5.3e-12`PF08323.10^Glyco_transf_5^Starch synthase catalytic domain^1183-1388^E:9.8e-14`PF00534.19^Glycos_transf_1^Glycosyl transferases group 1^1472-1574^E:3.1e-07	.	KEGG:spo:SPCC1281.01`KO:K00749	GO:0005619^cellular_component^ascospore wall`GO:0032153^cellular_component^cell division site`GO:0051286^cellular_component^cell tip`GO:0000935^cellular_component^division septum`GO:0009897^cellular_component^external side of plasma membrane`GO:0005887^cellular_component^integral component of plasma membrane`GO:0035841^cellular_component^new growing cell tip`GO:0035840^cellular_component^old grow…	GO:0003824^molecular_function^catalytic activity`GO:0005975^biological_process^carbohydrate metabolic process
GH106	#N/A	#N/A	LE01Gene12253	10.6062	10.2825	10.5951	12.0941	11.6622	12.0402	1.44281	6.47e-14	7.79e-13	LE01Gene12253	.	PF17132.3^Glyco_hydro_106^alpha-L-rhamnosidase^204-729^E:2e-24	.	.	.	.
GH27	#N/A	#N/A	LE01Gene09625	11.4922	10.8117	11.0517	12.9483	11.6247	12.7975	1.41897	0.00285985	0.00587497	LE01Gene09625	AGALB_TALEM^AGALB_TALEM^Q:733-1890,H:21-449^42.2%ID^E:1.7e-94^RecName: Full=Probable alpha-galactosidase B	PF16499.4^Melibiase_2^Alpha galactosidase A^69-341^E:2e-55	.	.	GO:0005576^cellular_component^extracellular region`GO:0052692^molecular_function^raffinose alpha-galactosidase activity`GO:0005975^biological_process^carbohydrate metabolic process	GO:0004553^molecular_function^hydrolase activity, hydrolyzing O-glycosyl compounds`GO:0005975^biological_process^carbohydrate metabolic process
CBM51; GH35	#N/A	#N/A	LE01Gene05961	11.4324	10.9219	10.9204	12.6876	11.2898	13.0704	1.41463	0.00299716	0.00612049	LE01Gene05961	BGALB_SCLS1^BGALB_SCLS1^Q:399-3290,H:15-965^37.8%ID^E:2.5e-168^RecName: Full=Probable beta-galactosidase B	.	.	.	.	.
GT1	#N/A	#N/A	LE01Gene00561	10.0768	9.76799	9.98407	11.3721	11.3317	11.3605	1.40702	1.78e-10	1.26e-09	LE01Gene00561	U80A2_ARATH^U80A2_ARATH^Q:317-1612,H:191-611^47.1%ID^E:3.3e-116^RecName: Full=Sterol 3-beta-glucosyltransferase UGT80A2	PF03033.19^Glyco_transf_28^Glycosyltransferase family 28 N-terminal domain^110-258^E:2e-20`PF00201.17^UDPGT^UDP-glucoronosyl and UDP-glucosyl transferase^373-482^E:4.3e-05	COG1819^Transferase	KEGG:ath:AT3G07020`KO:K05841	GO:0043231^cellular_component^intracellular membrane-bounded organelle`GO:0016020^cellular_component^membrane`GO:0005886^cellular_component^plasma membrane`GO:0051507^molecular_function^beta-sitosterol UDP-glucosyltransferase activity`GO:0102203^molecular_function^brassicasterol glucosyltransferase activity`GO:0102205^molecular_function^cholesterol allpha-glucosyltransferase activity`GO:0080043^m…	GO:0016758^molecular_function^transferase activity, transferring hexosyl groups`GO:0005975^biological_process^carbohydrate metabolic process`GO:0030259^biological_process^lipid glycosylation
GH28	#N/A	#N/A	LE01Gene05940	7.06809	7.61093	7.77718	9.02641	8.62269	8.99572	1.38191	0.000492174	0.0011669	LE01Gene05940	PGXC_ASPFN^PGXC_ASPFN^Q:505-1749,H:46-434^36.5%ID^E:9.8e-67^RecName: Full=Probable exopolygalacturonase C	.	.	.	.	.
GH16	#N/A	#N/A	LE01Gene11628	8.04315	8.0099	8.22169	9.65997	8.90215	9.70459	1.37422	2.25e-06	8.06e-06	LE01Gene11628	BGBP_PENMO^BGBP_PENMO^Q:721-1767,H:31-361^39.2%ID^E:1.7e-55^RecName: Full=Beta-1,3-glucan-binding protein {ECO:0000312|EMBL:AAM21213.1}	.	.	.	.	.
GH3	Hemicellulase	beta-xylosidase	LE01Gene06168	9.57425	9.15505	9.66638	10.8739	10.6294	11.0181	1.36851	3.59e-07	1.46e-06	LE01Gene06168	BGLX_ECOLI^BGLX_ECOLI^Q:235-2982,H:24-750^25.1%ID^E:8.3e-63^RecName: Full=Periplasmic beta-glucosidase	PF00933.20^Glyco_hydro_3^Glycosyl hydrolase family 3 N terminal domain^110-382^E:1.2e-39`PF01915.21^Glyco_hydro_3_C^Glycosyl hydrolase family 3 C-terminal domain^433-843^E:5.6e-42`PF07691.11^PA14^PA14 domain^537-675^E:4.8e-10`PF14310.5^Fn3-like^Fibronectin type III-like domain^885-953^E:8.4e-13	.	.	GO:0005576^cellular_component^extracellular region`GO:0008422^molecular_function^beta-glucosidase activity`GO:0102483^molecular_function^scopolin beta-glucosidase activity`GO:0030245^biological_process^cellulose catabolic process	GO:0004553^molecular_function^hydrolase activity, hydrolyzing O-glycosyl compounds`GO:0005975^biological_process^carbohydrate metabolic process
CBM21	#N/A	#N/A	LE01Gene05981	10.2467	10.0468	10.2859	11.7387	11.7804	11.0298	1.35874	4.9e-05	0.000139997	LE01Gene05981	PPR3E_MOUSE^PPR3E_MOUSE^Q:2154-2459,H:172-256^32.4%ID^E:5.6e-05^RecName: Full=Protein phosphatase 1 regulatory subunit 3E	PF03370.12^CBM_21^Carbohydrate/starch-binding module (family 21)^440-562^E:5.5e-20	.	.	.	GO:0005515^molecular_function^protein binding
CBM67	#N/A	#N/A	LE01Gene03573	8.5452	8.2238	8.00376	9.20902	9.68607	9.89556	1.35271	3.6e-07	1.46e-06	LE01Gene03573	.	.	.	.	.	.
GH18	#N/A	#N/A	LE01Gene07656	9.28478	9.16953	9.44132	10.5617	9.64917	11.2563	1.33029	0.000326418	0.000798192	LE01Gene07656	CHIA1_BACCI^CHIA1_BACCI^Q:2346-3308,H:154-451^27.9%ID^E:1.3e-27^RecName: Full=Chitinase A1	PF01062.20^Bestrophin^Bestrophin, RFP-TM, chloride channel^40-210^E:1.7e-14`PF01062.20^Bestrophin^Bestrophin, RFP-TM, chloride channel^385-509^E:3.2e-21`PF00704.27^Glyco_hydro_18^Glycosyl hydrolases family 18^589-957^E:2.1e-57	COG3781^UPF0187 protein	KEGG:ana:alr2987`KO:K08994	GO:0016021^cellular_component^integral component of membrane`GO:0005886^cellular_component^plasma membrane	GO:0005975^biological_process^carbohydrate metabolic process
GH43	#N/A	#N/A	LE01Gene10432	10.0623	9.58933	9.78866	11.3892	10.8713	11.1345	1.32126	7.9e-08	3.58e-07	LE01Gene10432	GH43B_BACO1^GH43B_BACO1^Q:1739-3478,H:18-523^34%ID^E:3e-72^RecName: Full=Non-reducing end alpha-L-arabinofuranosidase BoGH43B	PF04616.13^Glyco_hydro_43^Glycosyl hydrolases family 43^10-332^E:1.8e-65	COG3507^hydrolase family 43	.	GO:0042597^cellular_component^periplasmic space`GO:0046556^molecular_function^alpha-L-arabinofuranosidase activity`GO:0085030^biological_process^symbiont process benefiting host`GO:2000899^biological_process^xyloglucan catabolic process	GO:0004553^molecular_function^hydrolase activity, hydrolyzing O-glycosyl compounds`GO:0005975^biological_process^carbohydrate metabolic process
AA1	Lignin Oxidase	multicopper oxidase	LE01Gene06108	10.1449	9.70811	10.2974	11.5231	11.195	11.4257	1.31726	5.91e-09	3.26e-08	LE01Gene06108	LAC1_CRYNB^LAC1_CRYNB^Q:198-1814,H:43-560^30.4%ID^E:4.7e-61^RecName: Full=Laccase-1 {ECO:0000305}	.	.	.	.	.
AA1	Lignin Oxidase	multicopper oxidase	LE01Gene05032	11.4695	10.6274	10.3375	12.0231	12.3399	12.1974	1.29834	4.29e-07	1.72e-06	LE01Gene05032	FER1_USTMA^FER1_USTMA^Q:134-1903,H:20-618^46.4%ID^E:6.6e-157^RecName: Full=Iron multicopper oxidase fer1 {ECO:0000303|PubMed:17138696}	PF07732.14^Cu-oxidase_3^Multicopper oxidase^32-147^E:3.6e-29`PF00394.21^Cu-oxidase^Multicopper oxidase^154-317^E:4.2e-34`PF07731.13^Cu-oxidase_2^Multicopper oxidase^410-517^E:6.5e-35	.	KEGG:uma:UMAG_00105`KO:K19791	GO:0033573^cellular_component^high-affinity iron permease complex`GO:0005507^molecular_function^copper ion binding`GO:0004322^molecular_function^ferroxidase activity`GO:0033215^biological_process^iron assimilation by reduction and transport`GO:0034755^biological_process^iron ion transmembrane transport`GO:0006826^biological_process^iron ion transport`GO:0009405^biological_process^pathogenesis	GO:0005507^molecular_function^copper ion binding`GO:0055114^biological_process^oxidation-reduction process`GO:0016491^molecular_function^oxidoreductase activity
GH27	#N/A	#N/A	LE01Gene01844	11.2914	11.0816	11.9888	12.3562	11.9756	13.5508	1.28379	0.00049227	0.0011669	LE01Gene01844	AGALB_NEOFI^AGALB_NEOFI^Q:1117-2337,H:3-443^41.5%ID^E:8.5e-90^RecName: Full=Probable alpha-galactosidase B	.	.	.	GO:0005576^cellular_component^extracellular region`GO:0052692^molecular_function^raffinose alpha-galactosidase activity`GO:0005975^biological_process^carbohydrate metabolic process	.
GH43	#N/A	#N/A	LE01Gene06083	8.45558	8.68989	8.63552	10.0746	9.45117	9.94083	1.25099	0.000165284	0.000426281	LE01Gene06083	ABNA_ASPFN^ABNA_ASPFN^Q:950-1879,H:3-319^41%ID^E:1.5e-55^RecName: Full=Probable arabinan endo-1,5-alpha-L-arabinosidase A	.	.	.	.	.
GH20	#N/A	#N/A	LE01Gene02645	9.46091	9.0676	9.40111	10.6558	10.1796	10.7915	1.24617	2.99e-08	1.47e-07	LE01Gene02645	HEXA_PORGI^HEXA_PORGI^Q:150-1448,H:61-504^22%ID^E:2.6e-13^RecName: Full=Beta-hexosaminidase	PF00728.21^Glyco_hydro_20^Glycosyl hydrolase family 20, catalytic domain^152-480^E:3.4e-21	.	.	.	GO:0004553^molecular_function^hydrolase activity, hydrolyzing O-glycosyl compounds`GO:0005975^biological_process^carbohydrate metabolic process
PL38	#N/A	#N/A	LE01Gene07234	8.20148	8.48526	8.35995	9.63817	9.36958	9.74296	1.24094	2.1e-08	1.06e-07	LE01Gene07234	.	.	.	.	.	.
GT15	#N/A	#N/A	LE01Gene14235	8.81683	9.03371	8.99581	10.4104	9.62467	10.3038	1.2017	2.67e-10	1.82e-09	LE01Gene14235	MNT2_CANAL^MNT2_CANAL^Q:1-495,H:284-449^51.2%ID^E:1.3e-52^RecName: Full=Glycolipid 2-alpha-mannosyltransferase 2	PF01793.15^Glyco_transf_15^Glycolipid 2-alpha-mannosyltransferase^1-126^E:6.4e-58	.	KEGG:cal:CAALFM_C301830CA`KO:K10967	GO:0000139^cellular_component^Golgi membrane`GO:0016021^cellular_component^integral component of membrane`GO:0000026^molecular_function^alpha-1,2-mannosyltransferase activity`GO:0043710^biological_process^cell adhesion involved in multi-species biofilm formation`GO:0098609^biological_process^cell-cell adhesion`GO:0007160^biological_process^cell-matrix adhesion`GO:0051834^biological_process^evasio…	GO:0000030^molecular_function^mannosyltransferase activity`GO:0006486^biological_process^protein glycosylation`GO:0016020^cellular_component^membrane
GH3	Cellulase	beta-glucosidase	LE01Gene02578	9.40264	9.67468	9.58497	10.7523	11.1725	10.1438	1.19217	4.2e-05	0.0001215	LE01Gene02578	BGLG_ASPFN^BGLG_ASPFN^Q:502-2415,H:170-812^42.3%ID^E:1.2e-126^RecName: Full=Probable beta-glucosidase G	PF00933.20^Glyco_hydro_3^Glycosyl hydrolase family 3 N terminal domain^96-145^E:0.00013	.	.	GO:0008422^molecular_function^beta-glucosidase activity`GO:0102483^molecular_function^scopolin beta-glucosidase activity`GO:0030245^biological_process^cellulose catabolic process	GO:0004553^molecular_function^hydrolase activity, hydrolyzing O-glycosyl compounds`GO:0005975^biological_process^carbohydrate metabolic process
GH28	#N/A	#N/A	LE01Gene06700	8.27037	8.15273	8.63881	9.79809	8.97255	9.71428	1.17226	0.00011944	0.000318007	LE01Gene06700	RCC1_SCHPO^RCC1_SCHPO^Q:1208-2302,H:129-468^31.7%ID^E:5.8e-45^RecName: Full=Protein pim1	PF13540.5^RCC1_2^Regulator of chromosome condensation (RCC1) repeat^118-146^E:7.9e-08`PF00415.17^RCC1^Regulator of chromosome condensation (RCC1) repeat^135-188^E:3.1e-11`PF13540.5^RCC1_2^Regulator of chromosome condensation (RCC1) repeat^178-203^E:2.1e-05`PF00415.17^RCC1^Regulator of chromosome condensation (RCC1) repeat^192-251^E:2.1e-07`PF13540.5^RCC1_2^Regulator of chromosome condensation (RC…	.	.	GO:0005694^cellular_component^chromosome`GO:0005737^cellular_component^cytoplasm`GO:0005634^cellular_component^nucleus`GO:0005085^molecular_function^guanyl-nucleotide exchange factor activity`GO:0031492^molecular_function^nucleosomal DNA binding`GO:0051301^biological_process^cell division`GO:0007059^biological_process^chromosome segregation`GO:0051225^biological_process^spindle assembly	.
AA7	#N/A	#N/A	LE01Gene00047	11.7294	11.7762	12.3234	12.5956	13.7351	12.6913	1.13647	0.00230907	0.00484308	LE01Gene00047	A2372_ARTBC^A2372_ARTBC^Q:584-1669,H:43-394^29.8%ID^E:1.7e-33^RecName: Full=Uncharacterized FAD-linked oxidoreductase ARB_02372 {ECO:0000305}	PF01565.22^FAD_binding_4^FAD binding domain^84-218^E:6.9e-18	COG0277^FAD linked oxidase domain protein	KEGG:abe:ARB_02372	GO:0005576^cellular_component^extracellular region`GO:0071949^molecular_function^FAD binding`GO:0016491^molecular_function^oxidoreductase activity	GO:0016491^molecular_function^oxidoreductase activity`GO:0050660^molecular_function^flavin adenine dinucleotide binding`GO:0055114^biological_process^oxidation-reduction process
AA3	Lignin Degrading Auxiliary enzyme	alcohol oxidase	LE01Gene08342	6.95753	6.93869	6.07508	7.60814	7.61873	8.1689	1.1198	0.000162437	0.000419773	LE01Gene08342	ALOX_CANBO^ALOX_CANBO^Q:1-1671,H:1-563^35.2%ID^E:7.5e-90^RecName: Full=Alcohol oxidase	.	.	.	.	.
GH79	#N/A	#N/A	LE01Gene05168	11.6292	11.3138	11.7502	12.6494	12.7457	12.6424	1.10428	2.12e-14	2.7e-13	LE01Gene05168	GUS79_ASPNC^GUS79_ASPNC^Q:973-2427,H:53-541^25.2%ID^E:9.9e-15^RecName: Full=Beta-glucuronidase {ECO:0000303|PubMed:18377882}	.	.	.	.	.
AA14	#N/A	#N/A	LE01Gene07497	7.47801	6.68026	6.85351	7.9987	8.36495	7.95671	1.07822	0.000709722	0.00162885	LE01Gene07497	.	.	.	.	.	.
GT15	#N/A	#N/A	LE01Gene14236	8.0963	7.80883	8.31119	9.33902	8.83474	9.25935	1.0757	4.12e-07	1.66e-06	LE01Gene14236	KTR1_YEAST^KTR1_YEAST^Q:313-675,H:73-198^49.2%ID^E:8.5e-29^RecName: Full=Alpha-1,2 mannosyltransferase KTR1	PF01793.15^Glyco_transf_15^Glycolipid 2-alpha-mannosyltransferase^51-183^E:3.3e-37	.	KEGG:sce:YOR099W`KO:K10967	GO:0005794^cellular_component^Golgi apparatus`GO:0000139^cellular_component^Golgi membrane`GO:0016021^cellular_component^integral component of membrane`GO:0000026^molecular_function^alpha-1,2-mannosyltransferase activity`GO:0000032^biological_process^cell wall mannoprotein biosynthetic process`GO:0006487^biological_process^protein N-linked glycosylation`GO:0006493^biological_process^protein O-lin…	GO:0000030^molecular_function^mannosyltransferase activity`GO:0006486^biological_process^protein glycosylation`GO:0016020^cellular_component^membrane
GH2	#N/A	#N/A	LE01Gene02206	11.3773	11.0217	11.2774	12.3925	12.1141	12.318	1.04657	1.82e-13	2.02e-12	LE01Gene02206	BGA2_ECOLI^BGA2_ECOLI^Q:1798-4866,H:4-993^36.3%ID^E:5.8e-196^RecName: Full=Evolved beta-galactosidase subunit alpha	PF00097.24^zf-C3HC4^Zinc finger, C3HC4 type (RING finger)^486-574^E:4.6e-05`PF13639.5^zf-RING_2^Ring finger domain^544-575^E:9.6e-08`PF13923.5^zf-C3HC4_2^Zinc finger, C3HC4 type (RING finger)^544-574^E:3.6e-07`PF02837.17^Glyco_hydro_2_N^Glycosyl hydrolases family 2, sugar binding domain^638-811^E:1.3e-38`PF00703.20^Glyco_hydro_2^Glycosyl hydrolases family 2^814-908^E:1.2e-10`PF02836.16^Glyco_hydr…	COG3250^hydrolase family 2	KEGG:ecj:JW5511`KEGG:eco:b3076`KO:K12111	GO:0009341^cellular_component^beta-galactosidase complex`GO:0004565^molecular_function^beta-galactosidase activity`GO:0030246^molecular_function^carbohydrate binding`GO:0005990^biological_process^lactose catabolic process	GO:0046872^molecular_function^metal ion binding`GO:0004553^molecular_function^hydrolase activity, hydrolyzing O-glycosyl compounds`GO:0005975^biological_process^carbohydrate metabolic process`GO:0004565^molecular_function^beta-galactosidase activity`GO:0009341^cellular_component^beta-galactosidase complex
AA1	Lignin Oxidase	multicopper oxidase	LE01Gene07443	8.60644	8.52333	8.45279	9.74401	9.28311	9.63282	1.03851	2.93e-10	1.99e-09	LE01Gene07443	LAC2_TRAVE^LAC2_TRAVE^Q:508-2043,H:13-517^59.3%ID^E:1.3e-173^RecName: Full=Laccase-2	PF07732.14^Cu-oxidase_3^Multicopper oxidase^62-163^E:9.4e-32`PF00394.21^Cu-oxidase^Multicopper oxidase^176-321^E:6.4e-47`PF07731.13^Cu-oxidase_2^Multicopper oxidase^381-504^E:9.9e-38	.	.	GO:0005576^cellular_component^extracellular region`GO:0005507^molecular_function^copper ion binding`GO:0052716^molecular_function^hydroquinone:oxygen oxidoreductase activity`GO:0046274^biological_process^lignin catabolic process	GO:0005507^molecular_function^copper ion binding`GO:0055114^biological_process^oxidation-reduction process`GO:0016491^molecular_function^oxidoreductase activity
AA3	#N/A	#N/A	LE01Gene12448	10.5336	10.4099	10.6895	11.6352	11.5818	11.5199	1.03121	1.43e-10	1.03e-09	LE01Gene12448	CITC_MONPU^CITC_MONPU^Q:1372-3138,H:9-609^34.4%ID^E:1.2e-80^RecName: Full=Dehydrogenase mpl7 {ECO:0000303|PubMed:27913218}	.	.	.	.	.
GH92	#N/A	#N/A	LE01Gene07926	11.0291	10.354	10.8834	11.9529	10.794	12.3036	1.03007	0.00215409	0.00454083	LE01Gene07926	A7629_ARTBC^A7629_ARTBC^Q:380-2779,H:7-761^34.8%ID^E:1.5e-127^RecName: Full=Uncharacterized secreted glycosidase ARB_07629 {ECO:0000305}	.	.	.	.	.
GT76	#N/A	#N/A	LE01Gene01769	10.6136	10.6317	10.7264	11.8111	11.0596	12.0169	1.02638	4.94e-05	0.000140953	LE01Gene01769	GPI18_CRYNB^GPI18_CRYNB^Q:13-1131,H:16-423^32.3%ID^E:3.8e-41^RecName: Full=GPI mannosyltransferase 2	.	.	.	.	.
GT4	#N/A	#N/A	LE01Gene00638	14.256	13.8724	14.922	15.1578	15.9052	15.116	1.02431	7.58e-05	0.000208797	LE01Gene00638	TREPH_PLEPU^TREPH_PLEPU^Q:33-2240,H:1-739^76.8%ID^E:0^RecName: Full=Trehalose phosphorylase {ECO:0000312|EMBL:ABR88135.1}	.	.	.	.	.
GH5	#N/A	#N/A	LE01Gene08669	11.4859	11.2305	11.4849	12.5719	12.0497	12.5834	1.01702	2.99e-07	1.23e-06	LE01Gene08669	XYL5_PHACH^XYL5_PHACH^Q:26-1453,H:1-473^62.7%ID^E:1.1e-183^RecName: Full=Beta-xylosidase {ECO:0000303|PubMed:25300189}	PF00150.17^Cellulase^Cellulase (glycosyl hydrolase family 5)^81-349^E:4.8e-29`PF02627.19^CMD^Carboxymuconolactone decarboxylase family^528-587^E:1.6e-09`PF12697.6^Abhydrolase_6^Alpha/beta hydrolase family^776-1050^E:1.7e-09	.	.	GO:0005576^cellular_component^extracellular region`GO:0009044^molecular_function^xylan 1,4-beta-xylosidase activity`GO:0005975^biological_process^carbohydrate metabolic process	GO:0004553^molecular_function^hydrolase activity, hydrolyzing O-glycosyl compounds`GO:0005975^biological_process^carbohydrate metabolic process`GO:0051920^molecular_function^peroxiredoxin activity`GO:0055114^biological_process^oxidation-reduction process
GH92	#N/A	#N/A	LE01Gene09210	11.6949	11.7192	12.1474	13.2473	12.02	13.0794	1.0056	0.000575512	0.00134728	LE01Gene09210	A7629_ARTBC^A7629_ARTBC^Q:548-2710,H:46-717^33%ID^E:1.9e-96^RecName: Full=Uncharacterized secreted glycosidase ARB_07629 {ECO:0000305}	.	.	.	.	.
CE17	#N/A	#N/A	LE01Gene05798	12.6335	12.5437	12.0965	11.2285	11.6166	11.4097	-1.01608	8.24e-08	3.72e-07	LE01Gene05798	RWD2B_HUMAN^RWD2B_HUMAN^Q:414-653,H:194-271^40%ID^E:5.2e-11^RecName: Full=RWD domain-containing protein 2B	.	.	.	.	.
GH5	#N/A	#N/A	LE01Gene12502	13.3091	13.1869	13.0198	11.9503	12.3494	12.127	-1.02529	3.65e-12	3.31e-11	LE01Gene12502	EXGD_ASPCL^EXGD_ASPCL^Q:841-2175,H:372-821^35%ID^E:2e-70^RecName: Full=Probable glucan 1,3-beta-glucosidase D	.	.	.	.	.
GH13	#N/A	#N/A	LE01Gene13578	12.9708	13.3079	12.7221	11.7944	12.1682	11.9976	-1.02568	3.54e-06	1.23e-05	LE01Gene13578	AMY1_SCHOC^AMY1_SCHOC^Q:172-1581,H:36-511^45.1%ID^E:5e-114^RecName: Full=Alpha-amylase 1	PF00128.23^Alpha-amylase^Alpha amylase, catalytic domain^98-396^E:9.1e-48`PF09260.10^DUF1966^Domain of unknown function (DUF1966)^450-526^E:2.6e-18	.	.	GO:0005576^cellular_component^extracellular region`GO:0004556^molecular_function^alpha-amylase activity`GO:0103025^molecular_function^alpha-amylase activity (releasing maltohexaose)`GO:0005509^molecular_function^calcium ion binding`GO:0016052^biological_process^carbohydrate catabolic process	GO:0003824^molecular_function^catalytic activity`GO:0005975^biological_process^carbohydrate metabolic process`GO:0004556^molecular_function^alpha-amylase activity`GO:0005509^molecular_function^calcium ion binding`GO:0016052^biological_process^carbohydrate catabolic process
GT8	#N/A	#N/A	LE01Gene00367	12.7736	12.4808	12.3038	11.2969	11.6802	11.4647	-1.04359	0.000161493	0.000417518	LE01Gene00367	GYG1_CAEEL^GYG1_CAEEL^Q:109-771,H:4-219^44.9%ID^E:6e-44^RecName: Full=Glycogenin-1 {ECO:0000312|WormBase:F56B6.4a}	.	.	.	.	.
GH31	#N/A	#N/A	LE01Gene09429	12.5446	12.4336	12.6664	11.4592	11.0652	11.8397	-1.06261	2e-06	7.21e-06	LE01Gene09429	AGLU_CANTS^AGLU_CANTS^Q:1008-3767,H:57-1054^41.8%ID^E:3.3e-210^RecName: Full=Alpha-glucosidase	PF16863.4^NtCtMGAM_N^N-terminal barrel of NtMGAM and CtMGAM, maltase-glucoamylase^49-186^E:7.6e-30`PF01055.25^Glyco_hydro_31^Glycosyl hydrolases family 31^289-828^E:3.2e-141	.	.	GO:0004558^molecular_function^alpha-1,4-glucosidase activity`GO:0030246^molecular_function^carbohydrate binding`GO:0032450^molecular_function^maltose alpha-glucosidase activity	GO:0004553^molecular_function^hydrolase activity, hydrolyzing O-glycosyl compounds`GO:0005975^biological_process^carbohydrate metabolic process
GT90	#N/A	#N/A	LE01Gene12784	12.2882	11.9658	11.6018	10.6262	11.1541	10.905	-1.06804	3.95e-05	0.000114727	LE01Gene12784	CXT1_CRYNJ^CXT1_CRYNJ^Q:191-2332,H:116-661^23%ID^E:7.2e-29^RecName: Full=Beta-1,2-xylosyltransferase 1	.	.	.	.	.
GT22	#N/A	#N/A	LE01Gene00318	11.5296	11.2747	11.0573	9.6857	10.6724	10.1623	-1.07088	2.3e-05	6.97e-05	LE01Gene00318	ALG9_SCHPO^ALG9_SCHPO^Q:247-2178,H:11-565^35.8%ID^E:3.5e-98^RecName: Full=Alpha-1,2-mannosyltransferase alg9	PF03901.16^Glyco_transf_22^Alg9-like mannosyltransferase family^53-530^E:9.1e-76	.	KEGG:spo:SPAC1834.05`KO:K03846	GO:0005783^cellular_component^endoplasmic reticulum`GO:0030176^cellular_component^integral component of endoplasmic reticulum membrane`GO:0052926^molecular_function^dol-P-Man:Man(6)GlcNAc(2)-PP-Dol alpha-1,2-mannosyltransferase activity`GO:0052918^molecular_function^dol-P-Man:Man(8)GlcNAc(2)-PP-Dol alpha-1,2-mannosyltransferase activity`GO:0000030^molecular_function^mannosyltransferase activity`G…	GO:0016757^molecular_function^transferase activity, transferring glycosyl groups
AA6	Lignin Degrading Auxiliary enzyme	Benzoquinone reductase	LE01Gene10171	14.8619	14.7323	13.9915	13.7661	13.3174	13.3729	-1.07662	5.24e-05	0.000148692	LE01Gene10171	PST2_YEAST^PST2_YEAST^Q:430-1020,H:2-197^59.9%ID^E:3.3e-68^RecName: Full=Protoplast secreted protein 2	PF03358.14^FMN_red^NADPH-dependent FMN reductase^72-200^E:4.1e-10`PF02525.16^Flavodoxin_2^Flavodoxin-like fold^73-187^E:1.3e-06	.	KEGG:sce:YDR032C	GO:0005576^cellular_component^extracellular region`GO:0010181^molecular_function^FMN binding`GO:0042802^molecular_function^identical protein binding`GO:0003955^molecular_function^NAD(P)H dehydrogenase (quinone) activity	GO:0016491^molecular_function^oxidoreductase activity
PL7	#N/A	#N/A	LE01Gene12410	9.4198	10.1244	9.86102	8.49227	9.19879	8.30338	-1.11239	8.89e-06	2.88e-05	LE01Gene12410	ALYA_KLEPN^ALYA_KLEPN^Q:199-915,H:12-307^25.6%ID^E:1.3e-07^RecName: Full=Alginate lyase	PF08787.10^Alginate_lyase2^Alginate lyase^43-257^E:4.6e-49	.	.	.	.
CE4	#N/A	#N/A	LE01Gene02924	15.2028	15.2713	15.4233	13.5034	14.9006	13.7498	-1.11464	0.000894529	0.00202086	LE01Gene02924	CDA_AMYRO^CDA_AMYRO^Q:175-1104,H:46-358^46.4%ID^E:4.9e-80^RecName: Full=Chitin deacetylase	PF01522.20^Polysacc_deac_1^Polysaccharide deacetylase^142-256^E:2.4e-25	.	.	GO:0004099^molecular_function^chitin deacetylase activity`GO:0006032^biological_process^chitin catabolic process`GO:0000272^biological_process^polysaccharide catabolic process	GO:0016810^molecular_function^hydrolase activity, acting on carbon-nitrogen (but not peptide) bonds`GO:0005975^biological_process^carbohydrate metabolic process
GT39	#N/A	#N/A	LE01Gene10924	13.488	13.2625	12.9303	11.8777	12.2561	12.1013	-1.15827	3.32e-09	1.9e-08	LE01Gene10924	PMT4_YEAST^PMT4_YEAST^Q:248-2329,H:56-748^44.7%ID^E:1.5e-176^RecName: Full=Dolichyl-phosphate-mannose--protein mannosyltransferase 4	PF02366.17^PMT^Dolichyl-phosphate-mannose-protein mannosyltransferase^59-304^E:2.5e-83`PF13231.5^PMT_2^Dolichyl-phosphate-mannose-protein mannosyltransferase^141-292^E:1.7e-06`PF02815.18^MIR^MIR domain^351-513^E:2.8e-17`PF16192.4^PMT_4TMC^C-terminal four TMM region of protein-O-mannosyltransferase^544-759^E:1.9e-60	.	KEGG:sce:YJR143C`KO:K00728	GO:0097582^cellular_component^dolichyl-phosphate-mannose-protein mannosyltransferase Pmt1p-Pmt2p dimer complex`GO:0097586^cellular_component^dolichyl-phosphate-mannose-protein mannosyltransferase Pmt4p homodimer complex`GO:0016021^cellular_component^integral component of membrane`GO:0004169^molecular_function^dolichyl-phosphate-mannose-protein mannosyltransferase activity`GO:0042802^molecular_fun…	GO:0000030^molecular_function^mannosyltransferase activity`GO:0006493^biological_process^protein O-linked glycosylation`GO:0016020^cellular_component^membrane
GT69	#N/A	#N/A	LE01Gene05799	12.3596	12.3632	12.0078	10.8823	11.3165	11.0157	-1.16993	1.13e-08	5.94e-08	LE01Gene05799	CMT1_CRYNJ^CMT1_CRYNJ^Q:438-1373,H:76-399^33.1%ID^E:8.8e-37^RecName: Full=Alpha-1,3-mannosyltransferase CMT1	.	.	.	.	.
GH92	#N/A	#N/A	LE01Gene11792	12.8403	12.4505	12.4154	11.4814	11.1242	11.5559	-1.18326	5.67e-09	3.14e-08	LE01Gene11792	KN7L_ORYSJ^KN7L_ORYSJ^Q:3561-4175,H:2-219^40.7%ID^E:9.6e-34^RecName: Full=Kinesin-like protein KIN-7L {ECO:0000305}	.	.	.	.	.
GT59	#N/A	#N/A	LE01Gene00093	11.5796	11.3935	11.2705	9.79021	10.327	10.3788	-1.23165	4.96e-11	3.82e-10	LE01Gene00093	ALG10_ARATH^ALG10_ARATH^Q:55-1341,H:21-495^33.7%ID^E:9.2e-58^RecName: Full=Dol-P-Glc:Glc(2)Man(9)GlcNAc(2)-PP-Dol alpha-1,2-glucosyltransferase {ECO:0000305}	.	.	.	.	.
GH31	#N/A	#N/A	LE01Gene04444	12.3865	12.2539	11.8982	10.5395	11.2416	10.7832	-1.30945	5.65e-07	2.23e-06	LE01Gene04444	GLU2A_SCHPO^GLU2A_SCHPO^Q:319-2832,H:31-850^43.9%ID^E:4.9e-210^RecName: Full=Glucosidase 2 subunit alpha {ECO:0000250|UniProtKB:P38138}	.	.	.	.	.
GH9	Cellulase	Endo-beta-1,4-glucanase	LE01Gene08227	11.76	11.5721	11.5754	10.2284	10.4924	10.1834	-1.33091	1.87e-20	5.23e-19	LE01Gene08227	GUN4_THEFU^GUN4_THEFU^Q:106-1608,H:36-485^37.1%ID^E:5.9e-72^RecName: Full=Endoglucanase E-4	PF00759.18^Glyco_hydro_9^Glycosyl hydrolase family 9^53-532^E:5e-108	ENOG410XPC9^hydrolase family	.	GO:0008810^molecular_function^cellulase activity`GO:0030248^molecular_function^cellulose binding`GO:0030245^biological_process^cellulose catabolic process	GO:0004553^molecular_function^hydrolase activity, hydrolyzing O-glycosyl compounds`GO:0005975^biological_process^carbohydrate metabolic process
GH13	#N/A	#N/A	LE01Gene01055	10.3257	10.3476	10.2583	8.78193	9.23162	8.8765	-1.33502	1.36e-13	1.54e-12	LE01Gene01055	AMY_GEOSE^AMY_GEOSE^Q:153-1580,H:39-515^42.1%ID^E:2.3e-104^RecName: Full=Alpha-amylase	PF00128.23^Alpha-amylase^Alpha amylase, catalytic domain^54-390^E:1.7e-20	.	.	GO:0005576^cellular_component^extracellular region`GO:0004556^molecular_function^alpha-amylase activity`GO:0103025^molecular_function^alpha-amylase activity (releasing maltohexaose)`GO:0005509^molecular_function^calcium ion binding`GO:0005975^biological_process^carbohydrate metabolic process	GO:0003824^molecular_function^catalytic activity`GO:0005975^biological_process^carbohydrate metabolic process
AA3	#N/A	#N/A	LE01Gene12439	10.2909	10.5812	9.9944	8.68745	9.00212	9.18881	-1.33572	6.38e-10	4.09e-09	LE01Gene12439	CITC_MONPU^CITC_MONPU^Q:185-1966,H:3-609^35.3%ID^E:1.4e-91^RecName: Full=Dehydrogenase mpl7 {ECO:0000303|PubMed:27913218}	PF00732.18^GMC_oxred_N^GMC oxidoreductase^73-383^E:1.4e-52`PF05199.12^GMC_oxred_C^GMC oxidoreductase^514-650^E:4.5e-33	.	.	GO:0050660^molecular_function^flavin adenine dinucleotide binding`GO:0016614^molecular_function^oxidoreductase activity, acting on CH-OH group of donors	GO:0016614^molecular_function^oxidoreductase activity, acting on CH-OH group of donors`GO:0050660^molecular_function^flavin adenine dinucleotide binding`GO:0055114^biological_process^oxidation-reduction process
GT66	#N/A	#N/A	LE01Gene01107	14.1587	13.9648	13.6454	12.3705	12.7747	12.4031	-1.41026	1.06e-08	5.62e-08	LE01Gene01107	STT3_SCHPO^STT3_SCHPO^Q:279-2516,H:24-742^59%ID^E:4.6e-256^RecName: Full=Dolichyl-diphosphooligosaccharide--protein glycosyltransferase subunit stt3	PF02516.13^STT3^Oligosaccharyl transferase STT3 subunit^23-535^E:1.2e-138	.	KEGG:spo:SPBC1271.02`KO:K07151	GO:0005783^cellular_component^endoplasmic reticulum`GO:0016021^cellular_component^integral component of membrane`GO:0008250^cellular_component^oligosaccharyltransferase complex`GO:0004576^molecular_function^oligosaccharyl transferase activity`GO:0043687^biological_process^post-translational protein modification`GO:0006487^biological_process^protein N-linked glycosylation`GO:0018279^biological_pro…	GO:0004576^molecular_function^oligosaccharyl transferase activity`GO:0006486^biological_process^protein glycosylation`GO:0016020^cellular_component^membrane
AA9	Cellulase	Endo-beta-1,4-glucanase	LE01Gene03338	11.3438	11.2044	11.1034	9.53105	9.83808	9.95888	-1.43431	2.75e-11	2.21e-10	LE01Gene03338	CEL1_AGABI^CEL1_AGABI^Q:387-1118,H:16-253^33.5%ID^E:2.9e-24^RecName: Full=Cellulose-growth-specific protein	PF03443.13^Glyco_hydro_61^Glycosyl hydrolase family 61^23-240^E:1.6e-50	.	KEGG:tre:TRIREDRAFT_120961	GO:0005576^cellular_component^extracellular region`GO:0008810^molecular_function^cellulase activity`GO:0046872^molecular_function^metal ion binding`GO:0030245^biological_process^cellulose catabolic process	.
GH30	#N/A	#N/A	LE01Gene04345	13.3046	13.1788	12.6391	11.2552	11.8773	11.5478	-1.48608	7e-11	5.26e-10	LE01Gene04345	NEG1_NEUCR^NEG1_NEUCR^Q:160-1377,H:48-476^29.2%ID^E:1.9e-33^RecName: Full=Endo-1,6-beta-D-glucanase	PF02055.15^Glyco_hydro_30^Glycosyl hydrolase family 30 TIM-barrel domain^73-330^E:1.8e-26	.	.	GO:0005576^cellular_component^extracellular region`GO:0005615^cellular_component^extracellular space`GO:0046557^molecular_function^glucan endo-1,6-beta-glucosidase activity`GO:0004348^molecular_function^glucosylceramidase activity`GO:0016798^molecular_function^hydrolase activity, acting on glycosyl bonds`GO:0005976^biological_process^polysaccharide metabolic process`GO:0006665^biological_process^…	.
CE4	#N/A	#N/A	LE01Gene11812	14.9705	14.9165	14.3131	13.0109	13.1914	13.5447	-1.4963	8.9e-13	8.9e-12	LE01Gene11812	CDA_AMYRO^CDA_AMYRO^Q:503-1291,H:67-352^34.1%ID^E:5.7e-38^RecName: Full=Chitin deacetylase	PF01522.20^Polysacc_deac_1^Polysaccharide deacetylase^251-361^E:9.5e-28	.	.	GO:0004099^molecular_function^chitin deacetylase activity`GO:0006032^biological_process^chitin catabolic process`GO:0000272^biological_process^polysaccharide catabolic process	GO:0016810^molecular_function^hydrolase activity, acting on carbon-nitrogen (but not peptide) bonds`GO:0005975^biological_process^carbohydrate metabolic process
GT25	#N/A	#N/A	LE01Gene05153	9.93014	10.0257	9.43185	8.64436	7.9932	8.09368	-1.54878	0.000171347	0.000440462	LE01Gene05153	GT251_DANRE^GT251_DANRE^Q:1316-1840,H:387-574^28.6%ID^E:7.3e-10^RecName: Full=Procollagen galactosyltransferase 1	.	.	.	.	.
CBM18; GH16	#N/A	#N/A	LE01Gene11302	12.2872	12.4829	11.8704	10.7614	10.2759	10.9293	-1.55505	5.32e-10	3.45e-09	LE01Gene11302	CRF2_ASPFU^CRF2_ASPFU^Q:52-1098,H:6-346^43.2%ID^E:4.9e-73^RecName: Full=Probable glycosidase crf2	PF00722.20^Glyco_hydro_16^Glycosyl hydrolases family 16^112-290^E:3.2e-40	.	KEGG:afm:AFUA_2G03120	GO:0031225^cellular_component^anchored component of membrane`GO:0009277^cellular_component^fungal-type cell wall`GO:0005886^cellular_component^plasma membrane`GO:0004553^molecular_function^hydrolase activity, hydrolyzing O-glycosyl compounds`GO:0005975^biological_process^carbohydrate metabolic process`GO:0071555^biological_process^cell wall organization	GO:0004553^molecular_function^hydrolase activity, hydrolyzing O-glycosyl compounds`GO:0005975^biological_process^carbohydrate metabolic process
CBM43; GH72	#N/A	#N/A	LE01Gene08573	13.9036	13.8625	13.6573	12.2278	11.8924	12.5653	-1.55747	4.63e-20	1.24e-18	LE01Gene08573	GEL4_ASPFC^GEL4_ASPFC^Q:40-1509,H:11-481^38.4%ID^E:1.1e-81^RecName: Full=1,3-beta-glucanosyltransferase gel4	PF03198.13^Glyco_hydro_72^Glucanosyltransferase^51-361^E:2.3e-85`PF07983.12^X8^X8 domain^411-490^E:4.2e-17	.	KEGG:spo:SPAC19B12.02c	GO:0031362^cellular_component^anchored component of external side of plasma membrane`GO:0032153^cellular_component^cell division site`GO:0071944^cellular_component^cell periphery`GO:0043188^cellular_component^cell septum edging`GO:0005576^cellular_component^extracellular region`GO:0009277^cellular_component^fungal-type cell wall`GO:0035841^cellular_component^new growing cell tip`GO:0035840^cellul…	.
GT69	#N/A	#N/A	LE01Gene09778	12.3993	12.4861	12.0362	10.3805	11.1508	10.5081	-1.59939	5.26e-10	3.42e-09	LE01Gene09778	.	.	.	.	.	.
GH128	#N/A	#N/A	LE01Gene13878	16.2093	16.2231	15.6486	14.2414	14.7371	14.2767	-1.614	5.6e-17	1.02e-15	LE01Gene13878	ASL1_SCHPO^ASL1_SCHPO^Q:490-1191,H:299-529^30.8%ID^E:1.3e-21^RecName: Full=Alkali-sensitive linkage protein 1	.	.	.	.	.
AA1	Lignin Oxidase	multicopper oxidase	LE01Gene07758	13.1973	13.3113	12.7271	11.2688	11.5496	11.5138	-1.65082	1.06e-11	8.94e-11	LE01Gene07758	LAC2_TRAVE^LAC2_TRAVE^Q:969-2477,H:27-515^56.8%ID^E:3e-164^RecName: Full=Laccase-2	PF07732.14^Cu-oxidase_3^Multicopper oxidase^78-180^E:1.1e-33`PF00394.21^Cu-oxidase^Multicopper oxidase^193-339^E:2.2e-42`PF07731.13^Cu-oxidase_2^Multicopper oxidase^408-531^E:8.6e-38	.	.	GO:0005576^cellular_component^extracellular region`GO:0005507^molecular_function^copper ion binding`GO:0052716^molecular_function^hydroquinone:oxygen oxidoreductase activity`GO:0046274^biological_process^lignin catabolic process	GO:0005507^molecular_function^copper ion binding`GO:0055114^biological_process^oxidation-reduction process`GO:0016491^molecular_function^oxidoreductase activity
GH37	#N/A	#N/A	LE01Gene01228	13.2509	13.4206	13.0255	11.2343	12.0909	11.2342	-1.66207	5.72e-11	4.35e-10	LE01Gene01228	TREB_EMENI^TREB_EMENI^Q:99-2294,H:29-748^54.9%ID^E:9e-236^RecName: Full=Neutral trehalase	PF07492.10^Trehalase_Ca-bi^Neutral trehalase Ca2+ binding domain^100-129^E:6.4e-15`PF01204.17^Trehalase^Trehalase^159-734^E:1.1e-167	.	KEGG:ani:AN5635.2`KO:K01194	GO:0005737^cellular_component^cytoplasm`GO:0004555^molecular_function^alpha,alpha-trehalase activity`GO:0005509^molecular_function^calcium ion binding`GO:0015927^molecular_function^trehalase activity`GO:0030437^biological_process^ascospore formation`GO:0034605^biological_process^cellular response to heat`GO:0009267^biological_process^cellular response to starvation`GO:1903134^biological_process^t…	GO:0004555^molecular_function^alpha,alpha-trehalase activity`GO:0005509^molecular_function^calcium ion binding`GO:0005993^biological_process^trehalose catabolic process`GO:0005737^cellular_component^cytoplasm`GO:0005991^biological_process^trehalose metabolic process
AA5	Lignin Degrading Auxiliary enzyme	Galactose oxidase	LE01Gene12661	13.1569	12.9437	12.552	11.1052	11.0333	11.5065	-1.67538	2.65e-12	2.47e-11	LE01Gene12661	GLOX_PHACH^GLOX_PHACH^Q:180-1985,H:3-553^31%ID^E:8.6e-66^RecName: Full=Aldehyde oxidase GLOX {ECO:0000305}	PF07250.10^Glyoxal_oxid_N^Glyoxal oxidase N-terminus^206-308^E:2e-14`PF09118.10^DUF1929^Domain of unknown function (DUF1929)^488-596^E:1.8e-24	.	.	GO:0005618^cellular_component^cell wall`GO:0005615^cellular_component^extracellular space`GO:0004031^molecular_function^aldehyde oxidase activity`GO:0102797^molecular_function^geranial:oxygen oxidoreductase activity`GO:0102798^molecular_function^heptaldehyde:oxygen oxidoreductase activity`GO:0050832^biological_process^defense response to fungus	.
GH28	#N/A	#N/A	LE01Gene01562	9.8381	9.23751	8.80651	7.9987	7.66383	7.19066	-1.70693	0.000438884	0.00104864	LE01Gene01562	RHGA_ASPAC^RHGA_ASPAC^Q:263-1114,H:39-356^31.7%ID^E:9.2e-36^RecName: Full=Rhamnogalacturonase A	PF00295.16^Glyco_hydro_28^Glycosyl hydrolases family 28^128-315^E:2.7e-31	.	KEGG:ani:AN9134.2`KO:K18580	GO:0005576^cellular_component^extracellular region`GO:0004650^molecular_function^polygalacturonase activity`GO:0046576^molecular_function^rhamnogalacturonan alpha-L-rhamnopyranosyl-(1->4)-alpha-D-galactopyranosyluronide lyase activity`GO:0071555^biological_process^cell wall organization`GO:0045490^biological_process^pectin catabolic process	GO:0004650^molecular_function^polygalacturonase activity`GO:0005975^biological_process^carbohydrate metabolic process
AA7	#N/A	#N/A	LE01Gene13975	13.7608	13.9452	12.8016	11.5057	10.3317	12.7791	-1.71297	0.00166152	0.00357337	LE01Gene13975	A2372_ARTBC^A2372_ARTBC^Q:1183-2478,H:53-499^29.3%ID^E:1.5e-41^RecName: Full=Uncharacterized FAD-linked oxidoreductase ARB_02372 {ECO:0000305}	.	.	.	.	.
GH23	#N/A	#N/A	LE01Gene01933	12.5819	13.455	11.9696	11.2013	10.2807	11.3568	-1.781	3.96e-07	1.6e-06	LE01Gene01933	YJBJ_BACSU^YJBJ_BACSU^Q:944-1324,H:24-150^28.3%ID^E:3.3e-07^RecName: Full=Putative murein lytic transglycosylase YjbJ	PF01464.19^SLT^Transglycosylase SLT domain^184-269^E:2.3e-12	.	.	.	.
GT21	#N/A	#N/A	LE01Gene00486	11.7004	12.1069	11.4963	9.65997	10.3329	9.95562	-1.78169	2.42e-18	5.16e-17	LE01Gene00486	CEGT_CRYNH^CEGT_CRYNH^Q:174-1385,H:16-442^43.1%ID^E:3.2e-88^RecName: Full=Ceramide glucosyltransferase {ECO:0000250|UniProtKB:Q16739}	PF00535.25^Glycos_transf_2^Glycosyl transferase family 2^75-238^E:7.4e-05`PF13641.5^Glyco_tranf_2_3^Glycosyltransferase like family 2^76-315^E:2.2e-16`PF13506.5^Glyco_transf_21^Glycosyl transferase family 21^116-243^E:2.2e-21`PF13632.5^Glyco_trans_2_3^Glycosyl transferase family group 2^152-368^E:2e-06	.	.	GO:0000139^cellular_component^Golgi membrane`GO:0016021^cellular_component^integral component of membrane`GO:0008120^molecular_function^ceramide glucosyltransferase activity`GO:0102769^molecular_function^dihydroceramide glucosyltransferase activity`GO:0006665^biological_process^sphingolipid metabolic process	GO:0016757^molecular_function^transferase activity, transferring glycosyl groups
GH76	#N/A	#N/A	LE01Gene10275	10.09	10.0204	9.34772	8.19064	7.64895	8.14617	-1.84532	5.53e-08	2.58e-07	LE01Gene10275	.	.	.	.	.	.
AA14	#N/A	#N/A	LE01Gene02669	12.3063	12.1406	11.9801	10.2856	10.2711	10.3368	-1.85123	3.98e-19	9.48e-18	LE01Gene02669	.	.	.	.	.	.
GH71	#N/A	#N/A	LE01Gene04239	12.2999	12.1847	11.8205	9.83113	10.4924	10.3368	-1.86963	1.72e-13	1.92e-12	LE01Gene04239	AGN1_SCHPO^AGN1_SCHPO^Q:384-1940,H:21-420^34%ID^E:4.9e-59^RecName: Full=Glucan endo-1,3-alpha-glucosidase agn1	.	.	.	.	.
CBM13	#N/A	#N/A	LE01Gene06860	16.8738	17.4938	17.9441	15.8966	14.6219	15.8179	-1.95142	8.47e-05	0.000231514	LE01Gene06860	.	PF14200.5^RicinB_lectin_2^Ricin-type beta-trefoil lectin domain-like^5-76^E:8.9e-12	.	.	.	.
AA3; AA8	Lignin Degrading Auxiliary enzyme	aryl-alcohol oxidase	LE01Gene09156	9.999	11.4053	10.3646	8.74161	8.49542	8.70826	-2.06863	1.1e-10	8.07e-10	LE01Gene09156	PDH1_AGACM^PDH1_AGACM^Q:146-1852,H:29-593^36.6%ID^E:2.7e-91^RecName: Full=Pyranose dehydrogenase {ECO:0000303|PubMed:24970179}	PF00732.18^GMC_oxred_N^GMC oxidoreductase^36-339^E:4.7e-64`PF05199.12^GMC_oxred_C^GMC oxidoreductase^444-588^E:8.3e-30	.	.	GO:0005576^cellular_component^extracellular region`GO:0050660^molecular_function^flavin adenine dinucleotide binding`GO:0033718^molecular_function^pyranose dehydrogenase (acceptor) activity`GO:0005975^biological_process^carbohydrate metabolic process	GO:0016614^molecular_function^oxidoreductase activity, acting on CH-OH group of donors`GO:0050660^molecular_function^flavin adenine dinucleotide binding`GO:0055114^biological_process^oxidation-reduction process
AA7	#N/A	#N/A	LE01Gene02931	12.1897	11.4686	10.0363	9.58446	9.22661	9.31645	-2.09551	5.36e-08	2.5e-07	LE01Gene02931	CHG5_CHAGB^CHG5_CHAGB^Q:125-1756,H:60-608^39.7%ID^E:2.5e-107^RecName: Full=FAD-linked oxidoreductase CHGG_01242-2 {ECO:0000303|PubMed:23611317}	.	.	.	.	.
GH5	#N/A	#N/A	LE01Gene11040	13.1379	13.698	12.975	9.98586	12.1379	10.2753	-2.16707	3.8e-06	1.31e-05	LE01Gene11040	EXG_BLUGR^EXG_BLUGR^Q:152-1402,H:4-416^45.3%ID^E:1.9e-95^RecName: Full=Glucan 1,3-beta-glucosidase	PF00150.17^Cellulase^Cellulase (glycosyl hydrolase family 5)^78-212^E:8.3e-14	.	.	GO:0005576^cellular_component^extracellular region`GO:0004338^molecular_function^glucan exo-1,3-beta-glucosidase activity`GO:0005975^biological_process^carbohydrate metabolic process`GO:0071555^biological_process^cell wall organization	GO:0004553^molecular_function^hydrolase activity, hydrolyzing O-glycosyl compounds`GO:0005975^biological_process^carbohydrate metabolic process
AA9	Cellulase	Endo-beta-1,4-glucanase	LE01Gene14047	13.4287	13.4935	13.1611	10.9782	11.1828	11.2063	-2.24251	1.25e-27	8.62e-26	LE01Gene14047	GUN4_HYPJE^GUN4_HYPJE^Q:313-1047,H:5-252^34.9%ID^E:2.8e-25^RecName: Full=Endoglucanase-4	.	.	.	.	.
CBM13	#N/A	#N/A	LE01Gene10858	14.5448	14.9532	14.5773	12.0776	12.6852	12.436	-2.28337	8.28e-07	3.17e-06	LE01Gene10858	.	PF14200.5^RicinB_lectin_2^Ricin-type beta-trefoil lectin domain-like^46-116^E:9.8e-08	.	.	.	.
GT90	#N/A	#N/A	LE01Gene00533	9.79929	10.1244	9.09035	6.76784	7.80472	7.4814	-2.32457	5.97e-11	4.54e-10	LE01Gene00533	CXT1_CRYNJ^CXT1_CRYNJ^Q:328-1965,H:140-661^31.8%ID^E:1.6e-75^RecName: Full=Beta-1,2-xylosyltransferase 1	PF05686.11^Glyco_transf_90^Glycosyl transferase family 90^529-653^E:4.1e-19	ENOG4111KZD^Glycosyltransferase family 90 protein	KEGG:cne:CNL04750`KO:K11702	GO:0012505^cellular_component^endomembrane system`GO:0016021^cellular_component^integral component of membrane`GO:0046527^molecular_function^glucosyltransferase activity`GO:0035252^molecular_function^UDP-xylosyltransferase activity`GO:0045227^biological_process^capsule polysaccharide biosynthetic process`GO:0006688^biological_process^glycosphingolipid biosynthetic process`GO:0009405^biological_pr…	.
GH152	#N/A	#N/A	LE01Gene10845	10.4235	10.3455	9.51314	8.14808	6.62606	8.04536	-2.40313	5.68e-07	2.23e-06	LE01Gene10845	TLP_PRUAV^TLP_PRUAV^Q:81-860,H:1-245^38.2%ID^E:7.7e-38^RecName: Full=Glucan endo-1,3-beta-glucosidase	.	.	.	.	.
AA3	Lignin Degrading Auxiliary enzyme	aryl-alcohol oxidase	LE01Gene09147	11.0561	11.9141	11.4284	8.8706	9.03396	8.63668	-2.65535	2.53e-22	9.16e-21	LE01Gene09147	PDH1_LEUMG^PDH1_LEUMG^Q:97-1848,H:17-597^39.7%ID^E:1.2e-102^RecName: Full=Pyranose dehydrogenase 1 {ECO:0000303|PubMed:18097667}	PF00732.18^GMC_oxred_N^GMC oxidoreductase^61-363^E:6.8e-66`PF05199.12^GMC_oxred_C^GMC oxidoreductase^467-611^E:7.5e-34	.	.	GO:0005576^cellular_component^extracellular region`GO:0050660^molecular_function^flavin adenine dinucleotide binding`GO:0033718^molecular_function^pyranose dehydrogenase (acceptor) activity`GO:0005975^biological_process^carbohydrate metabolic process	GO:0016614^molecular_function^oxidoreductase activity, acting on CH-OH group of donors`GO:0050660^molecular_function^flavin adenine dinucleotide binding`GO:0055114^biological_process^oxidation-reduction process
AA14	#N/A	#N/A	LE01Gene07498	13.8703	13.728	12.9561	10.6933	11.1059	10.8733	-2.66998	1.08e-32	1.25e-30	LE01Gene07498	.	.	.	.	.	.
GH75	#N/A	#N/A	LE01Gene12054	11.1625	12.5332	11.8349	8.84799	9.50792	9.32406	-2.69965	1.9e-10	1.34e-09	LE01Gene12054	CSNC_ASPOZ^CSNC_ASPOZ^Q:353-961,H:42-247^49%ID^E:8.7e-48^RecName: Full=Endo-chitosanase C	PF07335.10^Glyco_hydro_75^Fungal chitosanase of glycosyl hydrolase group 75^177-291^E:1.7e-35	.	.	GO:0005576^cellular_component^extracellular region`GO:0016977^molecular_function^chitosanase activity`GO:0000272^biological_process^polysaccharide catabolic process	GO:0016977^molecular_function^chitosanase activity
CE4	#N/A	#N/A	LE01Gene03495	9.91273	10.9453	10.0974	7.49627	7.64146	7.90349	-2.70741	3.87e-09	2.19e-08	LE01Gene03495	CDA_AMYRO^CDA_AMYRO^Q:391-1293,H:52-358^43.4%ID^E:2.4e-70^RecName: Full=Chitin deacetylase	PF01522.20^Polysacc_deac_1^Polysaccharide deacetylase^142-256^E:1.7e-25	.	.	GO:0004099^molecular_function^chitin deacetylase activity`GO:0006032^biological_process^chitin catabolic process`GO:0000272^biological_process^polysaccharide catabolic process	GO:0016810^molecular_function^hydrolase activity, acting on carbon-nitrogen (but not peptide) bonds`GO:0005975^biological_process^carbohydrate metabolic process
CE17	#N/A	#N/A	LE01Gene12021	11.9214	11.7751	11.5827	8.76995	9.43174	8.73896	-2.75089	4.93e-21	1.48e-19	LE01Gene12021	.	.	.	.	.	.
GH13	#N/A	#N/A	LE01Gene12213	13.4589	13.5576	12.8353	10.6922	10.5254	10.287	-2.80735	7.55e-33	8.83e-31	LE01Gene12213	AMYB_ASPAW^AMYB_ASPAW^Q:192-1664,H:15-498^46.6%ID^E:6.8e-118^RecName: Full=Alpha-amylase B	.	.	.	.	.
CBM50	#N/A	#N/A	LE01Gene04605	11.8479	12.1187	11.7483	8.83272	8.42294	9.70069	-2.82917	2.42e-13	2.63e-12	LE01Gene04605	.	PF01476.19^LysM^LysM domain^32-77^E:5.8e-12`PF01476.19^LysM^LysM domain^82-122^E:1.4e-07	.	.	.	.
AA2	Lignin Oxidase	Other peroxidase	LE01Gene03920	15.0171	15.2937	15.0177	11.3508	13.1914	11.0935	-2.91199	1.71e-11	1.41e-10	LE01Gene03920	CCPR_CRYNB^CCPR_CRYNB^Q:116-1207,H:3-377^57.6%ID^E:2.9e-119^RecName: Full=Cytochrome c peroxidase, mitochondrial	PF00141.22^peroxidase^Peroxidase^110-332^E:3.1e-47	COG0376^Bifunctional enzyme with both catalase and broad- spectrum peroxidase activity (By similarity)	KEGG:cnb:CNBD3710`KO:K00428	GO:0005759^cellular_component^mitochondrial matrix`GO:0004130^molecular_function^cytochrome-c peroxidase activity`GO:0020037^molecular_function^heme binding`GO:0046872^molecular_function^metal ion binding`GO:0006979^biological_process^response to oxidative stress	GO:0004601^molecular_function^peroxidase activity`GO:0020037^molecular_function^heme binding`GO:0006979^biological_process^response to oxidative stress`GO:0055114^biological_process^oxidation-reduction process
GH26	#N/A	#N/A	LE01Gene13721	9.51692	10.8155	10.7085	7.67818	6.53189	7.27689	-3.22779	5.24e-17	9.63e-16	LE01Gene13721	.	PF02156.14^Glyco_hydro_26^Glycosyl hydrolase family 26^152-276^E:2.8e-06	.	.	.	GO:0004553^molecular_function^hydrolase activity, hydrolyzing O-glycosyl compounds
CE4	#N/A	#N/A	LE01Gene01633	13.7445	13.7733	12.6719	9.10479	8.98741	9.30879	-4.34158	6.85e-45	2.29e-42	LE01Gene01633	CDA_CRYNH^CDA_CRYNH^Q:147-1112,H:25-337^46.2%ID^E:8.4e-73^RecName: Full=Chitin deacetylase	.	.	.	.	.
CBM1; GH5_5	Cellulase	Endo-beta-1,4-glucanase	LE01Gene12259	9.79345	9.10573	7.57174	4.91248	4.37593	4.62167	-4.4897	2.35e-16	3.99e-15	LE01Gene12259	EG5A_PHACH^EG5A_PHACH^Q:608-1594,H:22-276^48%ID^E:1.2e-80^RecName: Full=Manganese dependent endoglucanase Eg5A {ECO:0000303|PubMed:26173955}	.	.	.	.	.
AA7	#N/A	#N/A	LE01Gene09065	11.4125	12.2068	11.0027	5.31549	5.14261	5.02198	-6.50498	1.46e-13	1.64e-12	LE01Gene09065	SORD_PENRW^SORD_PENRW^Q:163-1560,H:17-467^29.4%ID^E:5.1e-44^RecName: Full=FAD-linked oxidoreductase sorD {ECO:0000303|PubMed:28618182}	.	.	.	.	.

## Sheet: cs_3-VS-cs_2
CAZyme_family	Class	Gene name	Gene_id	cs_2_a	cs_2_b	cs_2_c	cs_3_a	cs_3_b	cs_3_c	log2FoldChange	pvalue	padj	id	sprot_Top_BLASTX_hit	Pfam	eggnog	Kegg	gene_ontology_blast	gene_ontology_pfam
CBM1; GH5_5	Cellulase	Endo-beta-1,4-glucanase	LE01Gene04836	11.0657	10.3088	11.3222	12.6576	11.6729	12.6566	1.43855	2.18e-05	0.00500043	LE01Gene04836	PDH1_AGABI^PDH1_AGABI^Q:934-2631,H:76-594^36%ID^E:1.5e-87^RecName: Full=Pyranose dehydrogenase {ECO:0000303|PubMed:11086703}	PF00732.18^GMC_oxred_N^GMC oxidoreductase^135-263^E:6.1e-24`PF05199.12^GMC_oxred_C^GMC oxidoreductase^363-504^E:2.3e-37	.	.	GO:0005576^cellular_component^extracellular region`GO:0050660^molecular_function^flavin adenine dinucleotide binding`GO:0033718^molecular_function^pyranose dehydrogenase (acceptor) activity`GO:0005975^biological_process^carbohydrate metabolic process	GO:0016614^molecular_function^oxidoreductase activity, acting on CH-OH group of donors`GO:0050660^molecular_function^flavin adenine dinucleotide binding`GO:0055114^biological_process^oxidation-reduction process
AA3	Lignin Degrading Auxiliary enzyme	aryl-alcohol oxidase	LE01Gene01562	10.6557	9.41822	8.17326	7.9987	7.66383	7.19066	-2.10219	1.48e-05	0.00412483	LE01Gene01562	RHGA_ASPAC^RHGA_ASPAC^Q:263-1114,H:39-356^31.7%ID^E:9.2e-36^RecName: Full=Rhamnogalacturonase A	PF00295.16^Glyco_hydro_28^Glycosyl hydrolases family 28^128-315^E:2.7e-31	.	KEGG:ani:AN9134.2`KO:K18580	GO:0005576^cellular_component^extracellular region`GO:0004650^molecular_function^polygalacturonase activity`GO:0046576^molecular_function^rhamnogalacturonan alpha-L-rhamnopyranosyl-(1->4)-alpha-D-galactopyranosyluronide lyase activity`GO:0071555^biological_process^cell wall organization`GO:0045490^biological_process^pectin catabolic process	GO:0004650^molecular_function^polygalacturonase activity`GO:0005975^biological_process^carbohydrate metabolic process
GH28	#N/A	#N/A	LE01Gene12259	7.71262	7.15847	6.15963	4.91248	4.37593	4.62167	-2.54032	3.97e-06	0.00165568	LE01Gene12259	EG5A_PHACH^EG5A_PHACH^Q:608-1594,H:22-276^48%ID^E:1.2e-80^RecName: Full=Manganese dependent endoglucanase Eg5A {ECO:0000303|PubMed:26173955}	.	.	.	.	.

## Sheet: ow_1-VS-cs_1
CAZyme_family	Class	Gene name	Gene_id	cs_1_a	cs_1_b	cs_1_c	ow_1_a	ow_1_b	ow_1_c	log2FoldChange	pvalue	padj	id	sprot_Top_BLASTX_hit	Pfam	eggnog	Kegg	gene_ontology_blast	gene_ontology_pfam
AA1	Lignin Oxidase	multicopper oxidase	LE01Gene04660	6.24207	6.96105	6.41981	8.02878	11.7612	12.3049	4.95743	7.55e-05	0.000853556	LE01Gene04660	LAC2_AGABI^LAC2_AGABI^Q:850-2421,H:1-520^44.4%ID^E:4.6e-126^RecName: Full=Laccase-2	.	.	.	.	.
GH16	#N/A	#N/A	LE01Gene11628	8.04315	8.0099	8.22169	11.5829	11.5254	11.1263	3.33545	8.46e-31	5.49e-28	LE01Gene11628	BGBP_PENMO^BGBP_PENMO^Q:721-1767,H:31-361^39.2%ID^E:1.7e-55^RecName: Full=Beta-1,3-glucan-binding protein {ECO:0000312|EMBL:AAM21213.1}	.	.	.	.	.
GH13	#N/A	#N/A	LE01Gene04133	7.96216	7.53844	7.88662	10.3981	10.1718	9.96822	2.38768	1.33e-21	3.7e-19	LE01Gene04133	AMT6_BACS7^AMT6_BACS7^Q:359-1843,H:30-518^48.2%ID^E:1.8e-133^RecName: Full=Glucan 1,4-alpha-maltohexaosidase	PF00128.23^Alpha-amylase^Alpha amylase, catalytic domain^43-389^E:1.7e-21`PF09154.9^DUF1939^Domain of unknown function (DUF1939)^442-495^E:2.1e-05	.	.	GO:0005576^cellular_component^extracellular region`GO:0005509^molecular_function^calcium ion binding`GO:0033927^molecular_function^glucan 1,4-alpha-maltohexaosidase activity`GO:0005983^biological_process^starch catabolic process	GO:0003824^molecular_function^catalytic activity`GO:0005975^biological_process^carbohydrate metabolic process`GO:0004553^molecular_function^hydrolase activity, hydrolyzing O-glycosyl compounds
GH28	#N/A	#N/A	LE01Gene08349	6.29263	6.88123	6.15093	7.95168	9.063	8.78074	2.2058	0.00136495	0.00885061	LE01Gene08349	PGLR1_ASPNC^PGLR1_ASPNC^Q:10-963,H:6-357^27.9%ID^E:4.8e-16^RecName: Full=Probable endopolygalacturonase I	PF00295.16^Glyco_hydro_28^Glycosyl hydrolases family 28^46-187^E:4.8e-16`PF00295.16^Glyco_hydro_28^Glycosyl hydrolases family 28^192-321^E:3.2e-17	.	.	GO:0005576^cellular_component^extracellular region`GO:0004650^molecular_function^polygalacturonase activity`GO:0071555^biological_process^cell wall organization`GO:0045490^biological_process^pectin catabolic process	GO:0004650^molecular_function^polygalacturonase activity`GO:0005975^biological_process^carbohydrate metabolic process
GH17	#N/A	#N/A	LE01Gene01277	8.6197	8.26033	7.49378	11.1525	9.53909	9.45135	2.08332	1.2e-06	2.67e-05	LE01Gene01277	BTGC_ASPNC^BTGC_ASPNC^Q:514-1458,H:363-678^35.1%ID^E:6.2e-45^RecName: Full=Putative glucan endo-1,3-beta-glucosidase btgC	PF00332.17^Glyco_hydro_17^Glycosyl hydrolases family 17^370-450^E:1.2e-08	.	KEGG:ang:ANI_1_1742064	GO:0016021^cellular_component^integral component of membrane`GO:0005886^cellular_component^plasma membrane`GO:0042973^molecular_function^glucan endo-1,3-beta-D-glucosidase activity`GO:0071555^biological_process^cell wall organization`GO:0000272^biological_process^polysaccharide catabolic process	GO:0004553^molecular_function^hydrolase activity, hydrolyzing O-glycosyl compounds`GO:0005975^biological_process^carbohydrate metabolic process
GH128	#N/A	#N/A	LE01Gene03896	8.89254	9.09566	8.84698	9.93305	11.7426	10.754	2.05009	0.000250417	0.00232351	LE01Gene03896	ASL1_SCHPO^ASL1_SCHPO^Q:52-768,H:296-529^33.6%ID^E:2.1e-30^RecName: Full=Alkali-sensitive linkage protein 1	PF11790.7^Glyco_hydro_cc^Glycosyl hydrolase catalytic core^20-255^E:1.8e-71	.	.	.	.
AA1	Lignin Oxidase	multicopper oxidase	LE01Gene04648	8.29538	8.26483	8.71576	9.33226	10.8391	10.8367	2.04958	1.03e-08	3.91e-07	LE01Gene04648	LAC2_AGABI^LAC2_AGABI^Q:851-2422,H:1-520^43.8%ID^E:2.7e-124^RecName: Full=Laccase-2	.	.	.	.	.
GH27	#N/A	#N/A	LE01Gene12953	7.66873	7.43839	6.90918	9.67831	9.10148	9.3745	2.03811	1.18e-08	4.46e-07	LE01Gene12953	AGALB_TALEM^AGALB_TALEM^Q:135-1289,H:21-448^42.3%ID^E:4.1e-94^RecName: Full=Probable alpha-galactosidase B	PF16499.4^Melibiase_2^Alpha galactosidase A^57-329^E:2.6e-57	.	.	GO:0005576^cellular_component^extracellular region`GO:0052692^molecular_function^raffinose alpha-galactosidase activity`GO:0005975^biological_process^carbohydrate metabolic process	GO:0004553^molecular_function^hydrolase activity, hydrolyzing O-glycosyl compounds`GO:0005975^biological_process^carbohydrate metabolic process
GH37	#N/A	#N/A	LE01Gene13906	9.94996	10.219	10.0047	11.35	12.149	11.6712	1.69956	1.18e-10	6.81e-09	LE01Gene13906	TREA_DICDI^TREA_DICDI^Q:323-2140,H:82-594^32.5%ID^E:1.4e-81^RecName: Full=Trehalase {ECO:0000305}	PF01204.17^Trehalase^Trehalase^17-456^E:8.5e-97`PF01204.17^Trehalase^Trehalase^560-607^E:2.8e-09	COG1626^trehalase	KEGG:ddi:DDB_G0283473`KO:K01194	GO:0004555^molecular_function^alpha,alpha-trehalase activity`GO:0005993^biological_process^trehalose catabolic process	GO:0004555^molecular_function^alpha,alpha-trehalase activity`GO:0005991^biological_process^trehalose metabolic process
AA7	#N/A	#N/A	LE01Gene02931	12.1897	11.4686	10.0363	13.6517	12.9422	12.5945	1.65434	1.63e-05	0.000238445	LE01Gene02931	CHG5_CHAGB^CHG5_CHAGB^Q:125-1756,H:60-608^39.7%ID^E:2.5e-107^RecName: Full=FAD-linked oxidoreductase CHGG_01242-2 {ECO:0000303|PubMed:23611317}	.	.	.	.	.
GH133; GH13_25	#N/A	#N/A	LE01Gene05224	11.8612	11.7212	11.7815	12.7787	13.5335	13.2286	1.424	1.33e-09	6.09e-08	LE01Gene05224	GDE_YEAST^GDE_YEAST^Q:250-4800,H:7-1523^42.9%ID^E:0^RecName: Full=Glycogen debranching enzyme	.	.	.	.	.
AA3; AA8	Lignin Degrading Auxiliary enzyme	aryl-alcohol oxidase	LE01Gene09156	9.999	11.4053	10.3646	12.5666	11.7337	11.9161	1.4005	1.05e-05	0.000166065	LE01Gene09156	PDH1_AGACM^PDH1_AGACM^Q:146-1852,H:29-593^36.6%ID^E:2.7e-91^RecName: Full=Pyranose dehydrogenase {ECO:0000303|PubMed:24970179}	PF00732.18^GMC_oxred_N^GMC oxidoreductase^36-339^E:4.7e-64`PF05199.12^GMC_oxred_C^GMC oxidoreductase^444-588^E:8.3e-30	.	.	GO:0005576^cellular_component^extracellular region`GO:0050660^molecular_function^flavin adenine dinucleotide binding`GO:0033718^molecular_function^pyranose dehydrogenase (acceptor) activity`GO:0005975^biological_process^carbohydrate metabolic process	GO:0016614^molecular_function^oxidoreductase activity, acting on CH-OH group of donors`GO:0050660^molecular_function^flavin adenine dinucleotide binding`GO:0055114^biological_process^oxidation-reduction process
AA3	Lignin Degrading Auxiliary enzyme	aryl-alcohol oxidase	LE01Gene09147	11.0561	11.9141	11.4284	13.2614	12.5488	12.807	1.39413	2.5e-07	6.96e-06	LE01Gene09147	PDH1_LEUMG^PDH1_LEUMG^Q:97-1848,H:17-597^39.7%ID^E:1.2e-102^RecName: Full=Pyranose dehydrogenase 1 {ECO:0000303|PubMed:18097667}	PF00732.18^GMC_oxred_N^GMC oxidoreductase^61-363^E:6.8e-66`PF05199.12^GMC_oxred_C^GMC oxidoreductase^467-611^E:7.5e-34	.	.	GO:0005576^cellular_component^extracellular region`GO:0050660^molecular_function^flavin adenine dinucleotide binding`GO:0033718^molecular_function^pyranose dehydrogenase (acceptor) activity`GO:0005975^biological_process^carbohydrate metabolic process	GO:0016614^molecular_function^oxidoreductase activity, acting on CH-OH group of donors`GO:0050660^molecular_function^flavin adenine dinucleotide binding`GO:0055114^biological_process^oxidation-reduction process
CBM21	#N/A	#N/A	LE01Gene05981	10.2467	10.0468	10.2859	11.1265	11.9267	11.5975	1.39067	3.23e-05	0.000421247	LE01Gene05981	PPR3E_MOUSE^PPR3E_MOUSE^Q:2154-2459,H:172-256^32.4%ID^E:5.6e-05^RecName: Full=Protein phosphatase 1 regulatory subunit 3E	PF03370.12^CBM_21^Carbohydrate/starch-binding module (family 21)^440-562^E:5.5e-20	.	.	.	GO:0005515^molecular_function^protein binding
GT25	#N/A	#N/A	LE01Gene05153	9.93014	10.0257	9.43185	11.336	11.0207	11.0712	1.332	0.00114048	0.00764529	LE01Gene05153	GT251_DANRE^GT251_DANRE^Q:1316-1840,H:387-574^28.6%ID^E:7.3e-10^RecName: Full=Procollagen galactosyltransferase 1	.	.	.	.	.
GH23	#N/A	#N/A	LE01Gene01933	12.5819	13.455	11.9696	14.0783	13.988	14.2095	1.2965	0.000218733	0.00207398	LE01Gene01933	YJBJ_BACSU^YJBJ_BACSU^Q:944-1324,H:24-150^28.3%ID^E:3.3e-07^RecName: Full=Putative murein lytic transglycosylase YjbJ	PF01464.19^SLT^Transglycosylase SLT domain^184-269^E:2.3e-12	.	.	.	.
GH71	#N/A	#N/A	LE01Gene00554	5.91632	6.49346	6.53753	7.57209	7.56155	7.72677	1.29097	0.000177241	0.00173399	LE01Gene00554	AGN1_SCHPO^AGN1_SCHPO^Q:499-1722,H:11-420^35%ID^E:1.5e-59^RecName: Full=Glucan endo-1,3-alpha-glucosidase agn1	PF03659.13^Glyco_hydro_71^Glycosyl hydrolase family 71^135-504^E:1.1e-101	.	.	GO:1990819^cellular_component^actin fusion focus`GO:0005618^cellular_component^cell wall`GO:0005576^cellular_component^extracellular region`GO:0043332^cellular_component^mating projection tip`GO:0051118^molecular_function^glucan endo-1,3-alpha-glucosidase activity`GO:0007049^biological_process^cell cycle`GO:0030995^biological_process^cell septum edging catabolic process`GO:1904541^biological_proc…	GO:0016787^molecular_function^hydrolase activity
GT90	#N/A	#N/A	LE01Gene13995	10.3227	10.144	10.0499	11.1624	11.4789	11.5322	1.22416	5.46e-05	0.000652814	LE01Gene13995	CXT1_CRYNJ^CXT1_CRYNJ^Q:1895-3436,H:152-661^33.9%ID^E:2.6e-81^RecName: Full=Beta-1,2-xylosyltransferase 1	.	.	.	.	.
CE4	#N/A	#N/A	LE01Gene01633	13.7445	13.7733	12.6719	14.5919	14.5538	14.6406	1.11704	0.000269352	0.00245829	LE01Gene01633	CDA_CRYNH^CDA_CRYNH^Q:147-1112,H:25-337^46.2%ID^E:8.4e-73^RecName: Full=Chitin deacetylase	.	.	.	.	.
AA2	Lignin Oxidase	Other peroxidase	LE01Gene03530	7.62336	7.15779	8.13095	6.88825	6.59096	6.50429	-1.02873	0.000114155	0.00120866	LE01Gene03530	WSCD2_ARTBC^WSCD2_ARTBC^Q:358-1404,H:56-403^35.1%ID^E:5.1e-45^RecName: Full=WSC domain-containing protein ARB_07870 {ECO:0000305}	PF00141.22^peroxidase^Peroxidase^13-207^E:7e-22	COG0376^Bifunctional enzyme with both catalase and broad- spectrum peroxidase activity (By similarity)	KEGG:ath:AT4G32320`KO:K00434	GO:0005829^cellular_component^cytosol`GO:0004130^molecular_function^cytochrome-c peroxidase activity`GO:0020037^molecular_function^heme binding`GO:0016688^molecular_function^L-ascorbate peroxidase activity`GO:0046872^molecular_function^metal ion binding`GO:0004601^molecular_function^peroxidase activity`GO:0034599^biological_process^cellular response to oxidative stress`GO:0042744^biological_proce…	GO:0004601^molecular_function^peroxidase activity`GO:0020037^molecular_function^heme binding`GO:0006979^biological_process^response to oxidative stress`GO:0055114^biological_process^oxidation-reduction process
GT15	#N/A	#N/A	LE01Gene10739	10.0204	10.5005	10.7804	9.50218	9.50122	9.01818	-1.11013	4.45e-06	8.13e-05	LE01Gene10739	MNT2_CANAL^MNT2_CANAL^Q:593-1114,H:138-311^52.9%ID^E:2e-52^RecName: Full=Glycolipid 2-alpha-mannosyltransferase 2	PF01793.15^Glyco_transf_15^Glycolipid 2-alpha-mannosyltransferase^3-95^E:1.3e-44	.	KEGG:cal:CAALFM_C301830CA`KO:K10967	GO:0000139^cellular_component^Golgi membrane`GO:0016021^cellular_component^integral component of membrane`GO:0000026^molecular_function^alpha-1,2-mannosyltransferase activity`GO:0043710^biological_process^cell adhesion involved in multi-species biofilm formation`GO:0098609^biological_process^cell-cell adhesion`GO:0007160^biological_process^cell-matrix adhesion`GO:0051834^biological_process^evasio…	GO:0000030^molecular_function^mannosyltransferase activity`GO:0006486^biological_process^protein glycosylation`GO:0016020^cellular_component^membrane
GH79	#N/A	#N/A	LE01Gene09636	9.665	9.51004	10.2732	8.61547	8.68478	8.48422	-1.26007	6.25e-05	0.000730351	LE01Gene09636	GUS79_ASPNC^GUS79_ASPNC^Q:1289-1939,H:317-540^30.6%ID^E:8e-17^RecName: Full=Beta-glucuronidase {ECO:0000303|PubMed:18377882}	.	.	.	.	.
GH47	#N/A	#N/A	LE01Gene11301	12.413	12.1006	13.0814	11.189	11.2986	10.9963	-1.425	0.00042677	0.00353856	LE01Gene11301	MNS1B_ASPTN^MNS1B_ASPTN^Q:72-1595,H:6-505^34.3%ID^E:1.2e-71^RecName: Full=Probable mannosyl-oligosaccharide alpha-1,2-mannosidase 1B	PF01532.19^Glyco_hydro_47^Glycosyl hydrolase family 47^63-532^E:3.7e-102`PF08309.10^LVIVD^LVIVD repeat^324-335^E:0.13	.	KEGG:act:ACLA_020870`KO:K01230	GO:0060205^cellular_component^cytoplasmic vesicle lumen`GO:0016020^cellular_component^membrane`GO:0005509^molecular_function^calcium ion binding`GO:0004571^molecular_function^mannosyl-oligosaccharide 1,2-alpha-mannosidase activity`GO:0005975^biological_process^carbohydrate metabolic process`GO:0006486^biological_process^protein glycosylation	GO:0004571^molecular_function^mannosyl-oligosaccharide 1,2-alpha-mannosidase activity`GO:0005509^molecular_function^calcium ion binding`GO:0016020^cellular_component^membrane
GT15	#N/A	#N/A	LE01Gene02420	11.6649	11.7993	12.3523	10.6808	10.3485	10.5312	-1.44464	2.98e-06	5.73e-05	LE01Gene02420	MNT2_CANAL^MNT2_CANAL^Q:358-1353,H:133-440^30.5%ID^E:5.8e-46^RecName: Full=Glycolipid 2-alpha-mannosyltransferase 2	.	.	.	.	.
AA1	Lignin Oxidase	multicopper oxidase	LE01Gene01361	8.11982	8.31343	8.52939	7.31497	6.53209	6.61236	-1.47357	1.61e-06	3.42e-05	LE01Gene01361	LAC2_AGABI^LAC2_AGABI^Q:757-2268,H:21-520^46.1%ID^E:2.4e-126^RecName: Full=Laccase-2	PF07732.14^Cu-oxidase_3^Multicopper oxidase^40-154^E:2.7e-27`PF00394.21^Cu-oxidase^Multicopper oxidase^167-318^E:1.2e-39`PF07731.13^Cu-oxidase_2^Multicopper oxidase^379-498^E:2.3e-32	.	.	GO:0005576^cellular_component^extracellular region`GO:0005507^molecular_function^copper ion binding`GO:0052716^molecular_function^hydroquinone:oxygen oxidoreductase activity`GO:0046274^biological_process^lignin catabolic process	GO:0005507^molecular_function^copper ion binding`GO:0055114^biological_process^oxidation-reduction process`GO:0016491^molecular_function^oxidoreductase activity
CBM67	#N/A	#N/A	LE01Gene08448	10.7028	10.6525	12.3339	9.90848	10.4603	9.34124	-1.48408	0.000628973	0.00477799	LE01Gene08448	.	.	.	.	.	.
AA3	#N/A	#N/A	LE01Gene06189	9.21877	9.89682	9.86525	8.14713	8.53542	7.83907	-1.49298	5.74e-06	9.95e-05	LE01Gene06189	CITC_MONPU^CITC_MONPU^Q:218-1984,H:9-609^34.7%ID^E:2e-82^RecName: Full=Dehydrogenase mpl7 {ECO:0000303|PubMed:27913218}	PF00732.18^GMC_oxred_N^GMC oxidoreductase^40-351^E:2.4e-60`PF05199.12^GMC_oxred_C^GMC oxidoreductase^481-618^E:1.8e-33	.	.	GO:0050660^molecular_function^flavin adenine dinucleotide binding`GO:0016614^molecular_function^oxidoreductase activity, acting on CH-OH group of donors	GO:0016614^molecular_function^oxidoreductase activity, acting on CH-OH group of donors`GO:0050660^molecular_function^flavin adenine dinucleotide binding`GO:0055114^biological_process^oxidation-reduction process
AA1	Lignin Oxidase	multicopper oxidase	LE01Gene08330	8.87882	8.04172	8.23917	7.04494	7.0865	6.47187	-1.54649	3.64e-06	6.85e-05	LE01Gene08330	LAC1_PHLRA^LAC1_PHLRA^Q:13-1587,H:8-515^65.9%ID^E:3.2e-199^RecName: Full=Laccase	.	.	.	.	.
AA3	Lignin Degrading Auxiliary enzyme	aryl-alcohol oxidase	LE01Gene04820	9.8759	10.1635	10.8889	8.7088	8.88625	8.81991	-1.56988	1.36e-07	3.96e-06	LE01Gene04820	DTXS3_METRA^DTXS3_METRA^Q:2343-3371,H:20-369^54.3%ID^E:5.9e-102^RecName: Full=Aldo-keto reductase dtxS3 {ECO:0000305}	PF00732.18^GMC_oxred_N^GMC oxidoreductase^43-356^E:1.3e-55`PF05199.12^GMC_oxred_C^GMC oxidoreductase^464-604^E:4.4e-29`PF00248.20^Aldo_ket_red^Aldo/keto reductase family^642-952^E:7.4e-68	.	KEGG:maj:MAA_10045	GO:0016491^molecular_function^oxidoreductase activity	GO:0016614^molecular_function^oxidoreductase activity, acting on CH-OH group of donors`GO:0050660^molecular_function^flavin adenine dinucleotide binding`GO:0055114^biological_process^oxidation-reduction process
GH1	Cellulase	beta-glucosidase	LE01Gene06300	10.8758	10.416	11.8295	9.37296	9.7604	9.47609	-1.61962	5.25e-06	9.25e-05	LE01Gene06300	BGL06_ORYSJ^BGL06_ORYSJ^Q:496-1890,H:50-511^34%ID^E:2.1e-71^RecName: Full=Beta-glucosidase 6 {ECO:0000305}	PF00232.17^Glyco_hydro_1^Glycosyl hydrolase family 1^165-640^E:3.6e-103	COG2723^beta-glucosidase	KEGG:osa:4332041`KO:K01188	GO:0005576^cellular_component^extracellular region`GO:0033907^molecular_function^beta-D-fucosidase activity`GO:0004565^molecular_function^beta-galactosidase activity`GO:0080083^molecular_function^beta-gentiobiose beta-glucosidase activity`GO:0008422^molecular_function^beta-glucosidase activity`GO:0080079^molecular_function^cellobiose glucosidase activity`GO:0042973^molecular_function^glucan endo-…	GO:0004553^molecular_function^hydrolase activity, hydrolyzing O-glycosyl compounds`GO:0005975^biological_process^carbohydrate metabolic process
AA1	Lignin Oxidase	multicopper oxidase	LE01Gene05032	11.4695	10.6274	10.3375	9.42889	9.03677	9.25811	-1.64624	1.96e-10	1.05e-08	LE01Gene05032	FER1_USTMA^FER1_USTMA^Q:134-1903,H:20-618^46.4%ID^E:6.6e-157^RecName: Full=Iron multicopper oxidase fer1 {ECO:0000303|PubMed:17138696}	PF07732.14^Cu-oxidase_3^Multicopper oxidase^32-147^E:3.6e-29`PF00394.21^Cu-oxidase^Multicopper oxidase^154-317^E:4.2e-34`PF07731.13^Cu-oxidase_2^Multicopper oxidase^410-517^E:6.5e-35	.	KEGG:uma:UMAG_00105`KO:K19791	GO:0033573^cellular_component^high-affinity iron permease complex`GO:0005507^molecular_function^copper ion binding`GO:0004322^molecular_function^ferroxidase activity`GO:0033215^biological_process^iron assimilation by reduction and transport`GO:0034755^biological_process^iron ion transmembrane transport`GO:0006826^biological_process^iron ion transport`GO:0009405^biological_process^pathogenesis	GO:0005507^molecular_function^copper ion binding`GO:0055114^biological_process^oxidation-reduction process`GO:0016491^molecular_function^oxidoreductase activity
GH92	#N/A	#N/A	LE01Gene09210	11.6949	11.7192	12.1474	10.1158	9.96621	10.3277	-1.72596	3.81e-09	1.6e-07	LE01Gene09210	A7629_ARTBC^A7629_ARTBC^Q:548-2710,H:46-717^33%ID^E:1.9e-96^RecName: Full=Uncharacterized secreted glycosidase ARB_07629 {ECO:0000305}	.	.	.	.	.
GH16	#N/A	#N/A	LE01Gene05083	8.71237	8.82098	9.67924	7.0555	7.49375	7.41339	-1.81256	0.000291918	0.00262121	LE01Gene05083	YHZ7_SCHPO^YHZ7_SCHPO^Q:102-995,H:126-417^44.7%ID^E:5.8e-63^RecName: Full=Probable glycosidase C21B10.07	PF00722.20^Glyco_hydro_16^Glycosyl hydrolases family 16^75-172^E:4.5e-07	.	KEGG:ang:ANI_1_2196024	GO:0031225^cellular_component^anchored component of membrane`GO:0005886^cellular_component^plasma membrane`GO:0052861^molecular_function^glucan endo-1,3-beta-glucanase activity, C-3 substituted reducing group`GO:0052862^molecular_function^glucan endo-1,4-beta-glucanase activity, C-3 substituted reducing group`GO:0030245^biological_process^cellulose catabolic process	GO:0004553^molecular_function^hydrolase activity, hydrolyzing O-glycosyl compounds`GO:0005975^biological_process^carbohydrate metabolic process
PL7	#N/A	#N/A	LE01Gene04142	9.76836	10.0701	9.85678	7.84608	7.9524	8.32995	-1.84998	1.03e-07	3.09e-06	LE01Gene04142	ALYA_KLEPN^ALYA_KLEPN^Q:359-634,H:15-99^39.4%ID^E:3.1e-05^RecName: Full=Alginate lyase	PF08787.10^Alginate_lyase2^Alginate lyase^41-253^E:2.1e-42	.	.	.	.
GH152	#N/A	#N/A	LE01Gene10845	10.4235	10.3455	9.51314	8.80587	8.07604	6.83265	-2.03784	2.11e-05	0.000296806	LE01Gene10845	TLP_PRUAV^TLP_PRUAV^Q:81-860,H:1-245^38.2%ID^E:7.7e-38^RecName: Full=Glucan endo-1,3-beta-glucosidase	.	.	.	.	.
CBM20; GH15	#N/A	#N/A	LE01Gene04190	10.7977	10.2489	10.2848	8.54972	8.56875	8.00122	-2.07346	6.78e-06	0.000114472	LE01Gene04190	AMYG_SCHCM^AMYG_SCHCM^Q:43-1725,H:18-576^62.7%ID^E:3.4e-199^RecName: Full=Glucoamylase ARB_02327-1 {ECO:0000305}	PF00723.20^Glyco_hydro_15^Glycosyl hydrolases family 15^34-447^E:1.5e-93`PF00686.18^CBM_20^Starch binding domain^481-569^E:1.6e-27	COG3387^glycoside hydrolase 15-related	KEGG:scm:SCHCODRAFT_57589`KO:K01178	GO:0005576^cellular_component^extracellular region`GO:0004339^molecular_function^glucan 1,4-alpha-glucosidase activity`GO:2001070^molecular_function^starch binding`GO:0000272^biological_process^polysaccharide catabolic process	GO:2001070^molecular_function^starch binding
GH27	#N/A	#N/A	LE01Gene09625	11.4922	10.8117	11.0517	8.64025	9.04732	9.38107	-2.09443	1.13e-05	0.000176411	LE01Gene09625	AGALB_TALEM^AGALB_TALEM^Q:733-1890,H:21-449^42.2%ID^E:1.7e-94^RecName: Full=Probable alpha-galactosidase B	PF16499.4^Melibiase_2^Alpha galactosidase A^69-341^E:2e-55	.	.	GO:0005576^cellular_component^extracellular region`GO:0052692^molecular_function^raffinose alpha-galactosidase activity`GO:0005975^biological_process^carbohydrate metabolic process	GO:0004553^molecular_function^hydrolase activity, hydrolyzing O-glycosyl compounds`GO:0005975^biological_process^carbohydrate metabolic process
AA6	Lignin Degrading Auxiliary enzyme	Benzoquinone reductase	LE01Gene10171	14.8619	14.7323	13.9915	12.1488	12.705	12.1428	-2.21918	7.84e-17	1.24e-14	LE01Gene10171	PST2_YEAST^PST2_YEAST^Q:430-1020,H:2-197^59.9%ID^E:3.3e-68^RecName: Full=Protoplast secreted protein 2	PF03358.14^FMN_red^NADPH-dependent FMN reductase^72-200^E:4.1e-10`PF02525.16^Flavodoxin_2^Flavodoxin-like fold^73-187^E:1.3e-06	.	KEGG:sce:YDR032C	GO:0005576^cellular_component^extracellular region`GO:0010181^molecular_function^FMN binding`GO:0042802^molecular_function^identical protein binding`GO:0003955^molecular_function^NAD(P)H dehydrogenase (quinone) activity	GO:0016491^molecular_function^oxidoreductase activity
AA5	Lignin Degrading Auxiliary enzyme	Glyoxal oxidase	LE01Gene02092	11.6701	11.4129	11.6815	9.38138	9.00466	9.04873	-2.44049	1.42e-05	0.000212804	LE01Gene02092	GLOX_PHACH^GLOX_PHACH^Q:491-2146,H:3-556^59.3%ID^E:3.9e-190^RecName: Full=Aldehyde oxidase GLOX {ECO:0000305}	PF07250.10^Glyoxal_oxid_N^Glyoxal oxidase N-terminus^233-445^E:2.9e-30`PF09118.10^DUF1929^Domain of unknown function (DUF1929)^609-708^E:1.5e-22	.	KEGG:ag:AAA33747`KO:K20929	GO:0005615^cellular_component^extracellular space`GO:0004031^molecular_function^aldehyde oxidase activity`GO:0102797^molecular_function^geranial:oxygen oxidoreductase activity`GO:0102798^molecular_function^heptaldehyde:oxygen oxidoreductase activity`GO:0050665^biological_process^hydrogen peroxide biosynthetic process	.
CBM67	#N/A	#N/A	LE01Gene11861	14.7801	14.1924	16.0141	12.0986	12.4429	11.5556	-3.12451	1.65e-12	1.25e-10	LE01Gene11861	.	.	.	.	.	.

## Sheet: ow_2-VS-cs_2
CAZyme_family	Class	Gene name	Gene_id	cs_2_a	cs_2_b	cs_2_c	ow_2_a	ow_2_b	ow_2_c	log2FoldChange	pvalue	padj	id	sprot_Top_BLASTX_hit	Pfam	eggnog	Kegg	gene_ontology_blast	gene_ontology_pfam
AA7	#N/A	#N/A	LE01Gene13975	10.7906	9.79382	10.8368	13.8539	15.1495	13.2764	3.76736	4.71e-12	2.19e-10	LE01Gene13975	A2372_ARTBC^A2372_ARTBC^Q:1183-2478,H:53-499^29.3%ID^E:1.5e-41^RecName: Full=Uncharacterized FAD-linked oxidoreductase ARB_02372 {ECO:0000305}	.	.	.	.	.
AA7	#N/A	#N/A	LE01Gene09065	5.97749	5.22491	6.32302	8.9865	10.6054	8.00654	3.70828	2.22e-05	0.000205031	LE01Gene09065	SORD_PENRW^SORD_PENRW^Q:163-1560,H:17-467^29.4%ID^E:5.1e-44^RecName: Full=FAD-linked oxidoreductase sorD {ECO:0000303|PubMed:28618182}	.	.	.	.	.
GH128	#N/A	#N/A	LE01Gene03896	8.7339	9.1294	8.94401	11.4438	13.337	11.8383	3.50863	3.65e-10	1.19e-08	LE01Gene03896	ASL1_SCHPO^ASL1_SCHPO^Q:52-768,H:296-529^33.6%ID^E:2.1e-30^RecName: Full=Alkali-sensitive linkage protein 1	PF11790.7^Glyco_hydro_cc^Glycosyl hydrolase catalytic core^20-255^E:1.8e-71	.	.	.	.
GH128	#N/A	#N/A	LE01Gene01001	11.5242	14.7878	11.7441	15.25	16.1487	18.0965	3.49922	0.00167085	0.00750437	LE01Gene01001	ASL1_SCHPO^ASL1_SCHPO^Q:820-1554,H:295-527^31.4%ID^E:3.5e-18^RecName: Full=Alkali-sensitive linkage protein 1	PF11790.7^Glyco_hydro_cc^Glycosyl hydrolase catalytic core^25-238^E:2.7e-32	.	.	.	.
GH18	#N/A	#N/A	LE01Gene04624	7.314	8.76172	7.77565	10.0167	10.5516	12.1802	3.14798	0.000236883	0.00151258	LE01Gene04624	.	.	.	.	.	.
AA3	Lignin Degrading Auxiliary enzyme	alcohol oxidase	LE01Gene10868	14.1812	14.1548	14.5876	16.726	18.0692	17.254	3.1351	3.26e-09	8.34e-08	LE01Gene10868	ALOX1_KOMPC^ALOX1_KOMPC^Q:38-1963,H:1-637^49.4%ID^E:1.1e-176^RecName: Full=Alcohol oxidase 1	.	.	.	.	.
GH18	#N/A	#N/A	LE01Gene04647	8.44398	9.2756	9.5224	12.1506	12.4434	11.3408	2.90159	0.000134662	0.000945546	LE01Gene04647	.	PF00704.27^Glyco_hydro_18^Glycosyl hydrolases family 18^64-301^E:9.8e-15	.	.	.	GO:0005975^biological_process^carbohydrate metabolic process
GH13	#N/A	#N/A	LE01Gene04133	8.38276	7.79566	8.18747	10.5023	11.0858	10.8411	2.69219	2.65e-27	6.88e-25	LE01Gene04133	AMT6_BACS7^AMT6_BACS7^Q:359-1843,H:30-518^48.2%ID^E:1.8e-133^RecName: Full=Glucan 1,4-alpha-maltohexaosidase	PF00128.23^Alpha-amylase^Alpha amylase, catalytic domain^43-389^E:1.7e-21`PF09154.9^DUF1939^Domain of unknown function (DUF1939)^442-495^E:2.1e-05	.	.	GO:0005576^cellular_component^extracellular region`GO:0005509^molecular_function^calcium ion binding`GO:0033927^molecular_function^glucan 1,4-alpha-maltohexaosidase activity`GO:0005983^biological_process^starch catabolic process	GO:0003824^molecular_function^catalytic activity`GO:0005975^biological_process^carbohydrate metabolic process`GO:0004553^molecular_function^hydrolase activity, hydrolyzing O-glycosyl compounds
GH18	#N/A	#N/A	LE01Gene05686	10.1599	9.98797	9.56294	13.3696	12.2685	11.6387	2.68284	8.81e-08	1.61e-06	LE01Gene05686	CHIA1_BACCI^CHIA1_BACCI^Q:672-1961,H:133-464^23%ID^E:1.2e-20^RecName: Full=Chitinase A1	PF00787.23^PX^PX domain^30-131^E:1.7e-14`PF00704.27^Glyco_hydro_18^Glycosyl hydrolases family 18^186-606^E:8.1e-56	COG3325^chitinase	KEGG:hsa:1118`KO:K01183	GO:0005576^cellular_component^extracellular region`GO:0005615^cellular_component^extracellular space`GO:0005764^cellular_component^lysosome`GO:0035580^cellular_component^specific granule lumen`GO:1904724^cellular_component^tertiary granule lumen`GO:0008061^molecular_function^chitin binding`GO:0004568^molecular_function^chitinase activity`GO:0008843^molecular_function^endochitinase activity`GO:000…	GO:0035091^molecular_function^phosphatidylinositol binding`GO:0005975^biological_process^carbohydrate metabolic process
GT25	#N/A	#N/A	LE01Gene05153	8.60198	8.53729	8.78487	10.2738	10.8637	11.7861	2.46807	1.85e-09	5.01e-08	LE01Gene05153	GT251_DANRE^GT251_DANRE^Q:1316-1840,H:387-574^28.6%ID^E:7.3e-10^RecName: Full=Procollagen galactosyltransferase 1	.	.	.	.	.
CE4	#N/A	#N/A	LE01Gene03495	6.58617	7.48591	7.16873	8.39629	9.79316	9.52037	2.23133	1.33e-06	1.77e-05	LE01Gene03495	CDA_AMYRO^CDA_AMYRO^Q:391-1293,H:52-358^43.4%ID^E:2.4e-70^RecName: Full=Chitin deacetylase	PF01522.20^Polysacc_deac_1^Polysaccharide deacetylase^142-256^E:1.7e-25	.	.	GO:0004099^molecular_function^chitin deacetylase activity`GO:0006032^biological_process^chitin catabolic process`GO:0000272^biological_process^polysaccharide catabolic process	GO:0016810^molecular_function^hydrolase activity, acting on carbon-nitrogen (but not peptide) bonds`GO:0005975^biological_process^carbohydrate metabolic process
GH75	#N/A	#N/A	LE01Gene12054	9.15334	10.1472	9.27203	11.8364	11.8569	11.6185	2.17988	2.63e-07	4.3e-06	LE01Gene12054	CSNC_ASPOZ^CSNC_ASPOZ^Q:353-961,H:42-247^49%ID^E:8.7e-48^RecName: Full=Endo-chitosanase C	PF07335.10^Glyco_hydro_75^Fungal chitosanase of glycosyl hydrolase group 75^177-291^E:1.7e-35	.	.	GO:0005576^cellular_component^extracellular region`GO:0016977^molecular_function^chitosanase activity`GO:0000272^biological_process^polysaccharide catabolic process	GO:0016977^molecular_function^chitosanase activity
CBM1; GH3	Cellulase	beta-glucosidase	LE01Gene10512	10.7505	10.3558	10.3179	13.0335	12.4763	11.4065	1.96339	3.29e-07	5.27e-06	LE01Gene10512	BGLL_ASPTN^BGLL_ASPTN^Q:79-2244,H:24-735^42.9%ID^E:1.7e-156^RecName: Full=Probable beta-glucosidase L	PF00933.20^Glyco_hydro_3^Glycosyl hydrolase family 3 N terminal domain^76-322^E:3.6e-40`PF01915.21^Glyco_hydro_3_C^Glycosyl hydrolase family 3 C-terminal domain^373-636^E:5.7e-44`PF14310.5^Fn3-like^Fibronectin type III-like domain^669-737^E:3.7e-21	.	KEGG:afm:AFUA_7G06140`KO:K05349	GO:0005576^cellular_component^extracellular region`GO:0008422^molecular_function^beta-glucosidase activity`GO:0102483^molecular_function^scopolin beta-glucosidase activity`GO:0030245^biological_process^cellulose catabolic process	GO:0004553^molecular_function^hydrolase activity, hydrolyzing O-glycosyl compounds`GO:0005975^biological_process^carbohydrate metabolic process
AA7	#N/A	#N/A	LE01Gene05597	8.23718	9.42215	7.99621	9.62538	10.3269	11.4103	1.95023	0.00145503	0.00669981	LE01Gene05597	CHG5_CHAGB^CHG5_CHAGB^Q:602-2266,H:49-608^34.9%ID^E:4e-84^RecName: Full=FAD-linked oxidoreductase CHGG_01242-2 {ECO:0000303|PubMed:23611317}	PF01565.22^FAD_binding_4^FAD binding domain^121-263^E:1.7e-19`PF08031.11^BBE^Berberine and berberine like^509-542^E:5.6e-07	ENOG4110F4M^FAD binding domain-containing protein	KEGG:abe:ARB_07056	GO:0005576^cellular_component^extracellular region`GO:0071949^molecular_function^FAD binding`GO:0016491^molecular_function^oxidoreductase activity	GO:0016491^molecular_function^oxidoreductase activity`GO:0050660^molecular_function^flavin adenine dinucleotide binding`GO:0055114^biological_process^oxidation-reduction process
GH37	#N/A	#N/A	LE01Gene13906	9.38952	9.79987	9.53171	10.993	11.8296	11.3269	1.84194	3.27e-12	1.56e-10	LE01Gene13906	TREA_DICDI^TREA_DICDI^Q:323-2140,H:82-594^32.5%ID^E:1.4e-81^RecName: Full=Trehalase {ECO:0000305}	PF01204.17^Trehalase^Trehalase^17-456^E:8.5e-97`PF01204.17^Trehalase^Trehalase^560-607^E:2.8e-09	COG1626^trehalase	KEGG:ddi:DDB_G0283473`KO:K01194	GO:0004555^molecular_function^alpha,alpha-trehalase activity`GO:0005993^biological_process^trehalose catabolic process	GO:0004555^molecular_function^alpha,alpha-trehalase activity`GO:0005991^biological_process^trehalose metabolic process
CBM13	#N/A	#N/A	LE01Gene10858	12.3629	12.7871	12.6993	13.7722	15.1773	13.4863	1.7195	0.000205842	0.00133917	LE01Gene10858	.	PF14200.5^RicinB_lectin_2^Ricin-type beta-trefoil lectin domain-like^46-116^E:9.8e-08	.	.	.	.
CE4	#N/A	#N/A	LE01Gene01633	9.72341	9.44358	9.41377	11.6966	11.262	10.5575	1.7129	2.79e-08	5.72e-07	LE01Gene01633	CDA_CRYNH^CDA_CRYNH^Q:147-1112,H:25-337^46.2%ID^E:8.4e-73^RecName: Full=Chitin deacetylase	.	.	.	.	.
GH5	#N/A	#N/A	LE01Gene07850	8.25193	8.90623	8.85481	9.39415	10.9808	10.1913	1.63261	3.25e-05	0.000281754	LE01Gene07850	EXG3_SCHPO^EXG3_SCHPO^Q:109-1578,H:4-448^30%ID^E:1.6e-58^RecName: Full=Glucan 1,3-beta-glucosidase 3	PF00150.17^Cellulase^Cellulase (glycosyl hydrolase family 5)^111-391^E:3.3e-17	.	KEGG:spo:SPBC2D10.05	GO:1990819^cellular_component^actin fusion focus`GO:0009986^cellular_component^cell surface`GO:0005737^cellular_component^cytoplasm`GO:0005829^cellular_component^cytosol`GO:0005576^cellular_component^extracellular region`GO:0005634^cellular_component^nucleus`GO:0046557^molecular_function^glucan endo-1,6-beta-glucosidase activity`GO:0004338^molecular_function^glucan exo-1,3-beta-glucosidase activi…	GO:0004553^molecular_function^hydrolase activity, hydrolyzing O-glycosyl compounds`GO:0005975^biological_process^carbohydrate metabolic process
GH76	#N/A	#N/A	LE01Gene10275	8.32813	8.14868	8.29201	9.70518	10.176	9.58582	1.59049	2.62e-06	3.18e-05	LE01Gene10275	.	.	.	.	.	.
AA7	#N/A	#N/A	LE01Gene10788	10.178	11.2508	11.2675	12.2373	13.2692	11.6678	1.5672	6.58e-05	0.00051058	LE01Gene10788	CHG5_CHAGB^CHG5_CHAGB^Q:740-2227,H:63-560^32.3%ID^E:1.5e-65^RecName: Full=FAD-linked oxidoreductase CHGG_01242-2 {ECO:0000303|PubMed:23611317}	.	.	.	.	.
AA7	#N/A	#N/A	LE01Gene06745	8.41806	6.95647	7.93013	9.049	9.71899	9.39759	1.5318	0.00133532	0.00626455	LE01Gene06745	PATO_ASPCL^PATO_ASPCL^Q:1087-2694,H:29-565^42%ID^E:5.9e-124^RecName: Full=FAD-linked oxidoreductase patO {ECO:0000303|PubMed:19383676}	PF01565.22^FAD_binding_4^FAD binding domain^127-267^E:4e-20`PF08031.11^BBE^Berberine and berberine like^512-548^E:5.6e-09	.	KEGG:act:ACLA_093700	GO:0071949^molecular_function^FAD binding`GO:0016491^molecular_function^oxidoreductase activity	GO:0016491^molecular_function^oxidoreductase activity`GO:0050660^molecular_function^flavin adenine dinucleotide binding`GO:0055114^biological_process^oxidation-reduction process
CBM1; GH3	Cellulase	beta-glucosidase	LE01Gene07574	11.963	13.0186	12.208	13.4932	13.7778	14.5087	1.52222	7.18e-05	0.000550895	LE01Gene07574	BGLL_ASPFU^BGLL_ASPFU^Q:562-2787,H:25-732^47.6%ID^E:1e-187^RecName: Full=Probable beta-glucosidase L	PF00933.20^Glyco_hydro_3^Glycosyl hydrolase family 3 N terminal domain^224-461^E:2.9e-42`PF01915.21^Glyco_hydro_3_C^Glycosyl hydrolase family 3 C-terminal domain^511-775^E:1.2e-47`PF14310.5^Fn3-like^Fibronectin type III-like domain^842-913^E:2.2e-17	.	KEGG:afm:AFUA_7G06140`KO:K05349	GO:0005576^cellular_component^extracellular region`GO:0008422^molecular_function^beta-glucosidase activity`GO:0102483^molecular_function^scopolin beta-glucosidase activity`GO:0030245^biological_process^cellulose catabolic process	GO:0004553^molecular_function^hydrolase activity, hydrolyzing O-glycosyl compounds`GO:0005975^biological_process^carbohydrate metabolic process
CBM48; GH13_8	#N/A	#N/A	LE01Gene07209	11.341	11.3288	11.4212	12.5808	13.4672	12.2818	1.50434	5.24e-07	7.88e-06	LE01Gene07209	GLGB_RHIID^GLGB_RHIID^Q:165-2231,H:16-681^68.5%ID^E:4.2e-296^RecName: Full=1,4-alpha-glucan-branching enzyme	PF02922.17^CBM_48^Carbohydrate-binding module 48 (Isoamylase N-terminal domain)^55-140^E:5.4e-19`PF00128.23^Alpha-amylase^Alpha amylase, catalytic domain^207-278^E:6.1e-10`PF02806.17^Alpha-amylase_C^Alpha amylase, C-terminal all-beta domain^586-699^E:1.8e-19	.	.	GO:0003844^molecular_function^1,4-alpha-glucan branching enzyme activity`GO:0102752^molecular_function^1,4-alpha-glucan branching enzyme activity (using a glucosylated glycogenin as primer for glycogen synthesis)`GO:0043169^molecular_function^cation binding`GO:0004553^molecular_function^hydrolase activity, hydrolyzing O-glycosyl compounds`GO:0005978^biological_process^glycogen biosynthetic process	GO:0004553^molecular_function^hydrolase activity, hydrolyzing O-glycosyl compounds`GO:0005975^biological_process^carbohydrate metabolic process`GO:0003824^molecular_function^catalytic activity`GO:0043169^molecular_function^cation binding
GT3	#N/A	#N/A	LE01Gene01015	12.0692	12.2801	12.101	13.3336	14.0129	13.3834	1.45822	2.34e-10	7.96e-09	LE01Gene01015	GYS_NEUCR^GYS_NEUCR^Q:86-2161,H:7-688^67.9%ID^E:4.1e-283^RecName: Full=Glycogen [starch] synthase	PF05693.12^Glycogen_syn^Glycogen synthase^40-684^E:0`PF08323.10^Glyco_transf_5^Starch synthase catalytic domain^42-273^E:3.8e-06	.	KEGG:ncr:NCU06687`KO:K00693	GO:0004373^molecular_function^glycogen (starch) synthase activity`GO:0005978^biological_process^glycogen biosynthetic process	GO:0004373^molecular_function^glycogen (starch) synthase activity`GO:0005978^biological_process^glycogen biosynthetic process
GT8	#N/A	#N/A	LE01Gene00367	11.4144	11.5618	11.3883	12.8178	12.2862	13.3624	1.43181	2.24e-07	3.71e-06	LE01Gene00367	GYG1_CAEEL^GYG1_CAEEL^Q:109-771,H:4-219^44.9%ID^E:6e-44^RecName: Full=Glycogenin-1 {ECO:0000312|WormBase:F56B6.4a}	.	.	.	.	.
GH27	#N/A	#N/A	LE01Gene01844	12.4182	12.5366	12.9514	13.354	13.9466	14.6108	1.40723	0.000132024	0.000930749	LE01Gene01844	AGALB_NEOFI^AGALB_NEOFI^Q:1117-2337,H:3-443^41.5%ID^E:8.5e-90^RecName: Full=Probable alpha-galactosidase B	.	.	.	GO:0005576^cellular_component^extracellular region`GO:0052692^molecular_function^raffinose alpha-galactosidase activity`GO:0005975^biological_process^carbohydrate metabolic process	.
CBM21	#N/A	#N/A	LE01Gene06320	9.37612	10.3341	9.6798	10.697	11.2246	11.6883	1.4064	0.0006826	0.00363566	LE01Gene06320	GBS76_DROME^GBS76_DROME^Q:1063-1602,H:447-629^30.6%ID^E:5.6e-12^RecName: Full=Glycogen-binding subunit 76A	.	.	.	.	.
GH26	#N/A	#N/A	LE01Gene13721	7.40478	7.96688	7.63755	9.44152	9.11323	8.30867	1.34393	0.000461002	0.00263291	LE01Gene13721	.	PF02156.14^Glyco_hydro_26^Glycosyl hydrolase family 26^152-276^E:2.8e-06	.	.	.	GO:0004553^molecular_function^hydrolase activity, hydrolyzing O-glycosyl compounds
AA3	#N/A	#N/A	LE01Gene13764	9.93773	10.9886	10.4544	11.7418	11.9093	11.5868	1.22899	0.00081081	0.00417218	LE01Gene13764	BETA_PSE14^BETA_PSE14^Q:1352-3019,H:7-535^32.5%ID^E:5e-67^RecName: Full=Oxygen-dependent choline dehydrogenase {ECO:0000255|HAMAP-Rule:MF_00750}	.	.	.	.	.
CBM20; GH15	#N/A	#N/A	LE01Gene12151	8.07524	8.3395	8.66473	9.35758	9.92235	9.37308	1.19792	3.21e-05	0.000278609	LE01Gene12151	AMYG_SCHCM^AMYG_SCHCM^Q:136-1821,H:22-575^56.6%ID^E:5e-189^RecName: Full=Glucoamylase ARB_02327-1 {ECO:0000305}	PF00723.20^Glyco_hydro_15^Glycosyl hydrolases family 15^62-477^E:4.2e-90`PF00686.18^CBM_20^Starch binding domain^513-601^E:9.3e-26	COG3387^glycoside hydrolase 15-related	KEGG:scm:SCHCODRAFT_57589`KO:K01178	GO:0005576^cellular_component^extracellular region`GO:0004339^molecular_function^glucan 1,4-alpha-glucosidase activity`GO:2001070^molecular_function^starch binding`GO:0000272^biological_process^polysaccharide catabolic process	GO:2001070^molecular_function^starch binding
GH16	#N/A	#N/A	LE01Gene09781	12.4255	13.4331	12.5647	13.7381	14.2853	14.0961	1.17705	0.000153952	0.00105385	LE01Gene09781	EGLX_ASPFC^EGLX_ASPFC^Q:168-1085,H:18-327^43.2%ID^E:4e-61^RecName: Full=Probable endo-1,3(4)-beta-glucanase AFUB_029980	.	.	.	.	.
GT57	#N/A	#N/A	LE01Gene03331	10.2906	10.5106	10.5935	11.4366	11.501	11.8996	1.15727	7.66e-08	1.42e-06	LE01Gene03331	ALG6_YEAST^ALG6_YEAST^Q:551-2041,H:42-529^42.5%ID^E:6.9e-100^RecName: Full=Dolichyl pyrophosphate Man9GlcNAc2 alpha-1,3-glucosyltransferase	PF03155.14^Alg6_Alg8^ALG6, ALG8 glycosyltransferase family^171-660^E:5.9e-131	.	KEGG:sce:YOR002W`KO:K03848	GO:0005783^cellular_component^endoplasmic reticulum`GO:0005789^cellular_component^endoplasmic reticulum membrane`GO:0016021^cellular_component^integral component of membrane`GO:0042281^molecular_function^dolichyl pyrophosphate Man9GlcNAc2 alpha-1,3-glucosyltransferase activity`GO:0016758^molecular_function^transferase activity, transferring hexosyl groups`GO:0009060^biological_process^aerobic res…	GO:0016758^molecular_function^transferase activity, transferring hexosyl groups`GO:0005789^cellular_component^endoplasmic reticulum membrane
GH16_2	#N/A	#N/A	LE01Gene09705	12.474	12.4318	12.5011	13.4858	13.5904	13.5213	1.06405	8.07e-14	5.18e-12	LE01Gene09705	KRE6_YEAST^KRE6_YEAST^Q:392-1894,H:219-705^44.9%ID^E:1.3e-113^RecName: Full=Beta-glucan synthesis-associated protein KRE6	.	.	.	.	.
GH31	#N/A	#N/A	LE01Gene09429	11.3335	11.3199	11.5737	12.352	12.5305	12.4756	1.04107	3.2e-06	3.81e-05	LE01Gene09429	AGLU_CANTS^AGLU_CANTS^Q:1008-3767,H:57-1054^41.8%ID^E:3.3e-210^RecName: Full=Alpha-glucosidase	PF16863.4^NtCtMGAM_N^N-terminal barrel of NtMGAM and CtMGAM, maltase-glucoamylase^49-186^E:7.6e-30`PF01055.25^Glyco_hydro_31^Glycosyl hydrolases family 31^289-828^E:3.2e-141	.	.	GO:0004558^molecular_function^alpha-1,4-glucosidase activity`GO:0030246^molecular_function^carbohydrate binding`GO:0032450^molecular_function^maltose alpha-glucosidase activity	GO:0004553^molecular_function^hydrolase activity, hydrolyzing O-glycosyl compounds`GO:0005975^biological_process^carbohydrate metabolic process
GH16_1	#N/A	#N/A	LE01Gene01843	9.80402	9.20891	9.14672	8.03894	8.45868	8.58963	-1.03958	0.00100296	0.0049496	LE01Gene01843	YHZ7_SCHPO^YHZ7_SCHPO^Q:103-1077,H:122-417^37%ID^E:1.8e-56^RecName: Full=Probable glycosidase C21B10.07	.	.	KEGG:spo:SPBC21B10.07	GO:0009277^cellular_component^fungal-type cell wall`GO:0016021^cellular_component^integral component of membrane`GO:0004553^molecular_function^hydrolase activity, hydrolyzing O-glycosyl compounds`GO:0071966^biological_process^fungal-type cell wall polysaccharide metabolic process	.
GT15	#N/A	#N/A	LE01Gene00748	12.8995	12.2602	12.478	11.5207	11.7841	11.1689	-1.05792	3.68e-06	4.3e-05	LE01Gene00748	MNT1_CANAL^MNT1_CANAL^Q:631-1638,H:108-417^47.8%ID^E:1.9e-89^RecName: Full=Glycolipid 2-alpha-mannosyltransferase 1	PF01793.15^Glyco_transf_15^Glycolipid 2-alpha-mannosyltransferase^48-172^E:3.6e-29`PF01793.15^Glyco_transf_15^Glycolipid 2-alpha-mannosyltransferase^227-373^E:1.5e-68	.	KEGG:cal:CAALFM_C301810CA`KO:K10967	GO:0005576^cellular_component^extracellular region`GO:0000139^cellular_component^Golgi membrane`GO:0016021^cellular_component^integral component of membrane`GO:0016020^cellular_component^membrane`GO:0005886^cellular_component^plasma membrane`GO:0000026^molecular_function^alpha-1,2-mannosyltransferase activity`GO:0043710^biological_process^cell adhesion involved in multi-species biofilm formation`…	GO:0000030^molecular_function^mannosyltransferase activity`GO:0006486^biological_process^protein glycosylation`GO:0016020^cellular_component^membrane
GT15	#N/A	#N/A	LE01Gene14236	9.00162	8.79847	9.00145	7.81747	7.97885	7.71892	-1.09743	2.89e-07	4.67e-06	LE01Gene14236	KTR1_YEAST^KTR1_YEAST^Q:313-675,H:73-198^49.2%ID^E:8.5e-29^RecName: Full=Alpha-1,2 mannosyltransferase KTR1	PF01793.15^Glyco_transf_15^Glycolipid 2-alpha-mannosyltransferase^51-183^E:3.3e-37	.	KEGG:sce:YOR099W`KO:K10967	GO:0005794^cellular_component^Golgi apparatus`GO:0000139^cellular_component^Golgi membrane`GO:0016021^cellular_component^integral component of membrane`GO:0000026^molecular_function^alpha-1,2-mannosyltransferase activity`GO:0000032^biological_process^cell wall mannoprotein biosynthetic process`GO:0006487^biological_process^protein N-linked glycosylation`GO:0006493^biological_process^protein O-lin…	GO:0000030^molecular_function^mannosyltransferase activity`GO:0006486^biological_process^protein glycosylation`GO:0016020^cellular_component^membrane
GH2	#N/A	#N/A	LE01Gene01683	13.0674	12.6341	12.9725	11.8471	11.6316	11.6303	-1.19661	9.41e-06	9.78e-05	LE01Gene01683	MANBB_THIHE^MANBB_THIHE^Q:1673-4219,H:7-853^45.6%ID^E:1.1e-217^RecName: Full=Beta-mannosidase B	PF07690.15^MFS_1^Major Facilitator Superfamily^89-462^E:2.9e-34`PF00703.20^Glyco_hydro_2^Glycosyl hydrolases family 2^746-852^E:4.2e-08	COG3250^hydrolase family 2	.	GO:0005576^cellular_component^extracellular region`GO:0004567^molecular_function^beta-mannosidase activity`GO:0000272^biological_process^polysaccharide catabolic process	GO:0055085^biological_process^transmembrane transport`GO:0016021^cellular_component^integral component of membrane`GO:0004553^molecular_function^hydrolase activity, hydrolyzing O-glycosyl compounds`GO:0005975^biological_process^carbohydrate metabolic process
PL7	#N/A	#N/A	LE01Gene04142	11.5568	11.0685	10.8797	9.22625	9.59647	10.6137	-1.26175	0.000248731	0.00157462	LE01Gene04142	ALYA_KLEPN^ALYA_KLEPN^Q:359-634,H:15-99^39.4%ID^E:3.1e-05^RecName: Full=Alginate lyase	PF08787.10^Alginate_lyase2^Alginate lyase^41-253^E:2.1e-42	.	.	.	.
GH43	#N/A	#N/A	LE01Gene09852	10.349	9.65207	9.52613	8.59091	7.84578	9.00663	-1.33513	0.000191518	0.00126858	LE01Gene09852	ABNA_ASPFN^ABNA_ASPFN^Q:528-1493,H:6-319^43.3%ID^E:1.4e-58^RecName: Full=Probable arabinan endo-1,5-alpha-L-arabinosidase A	PF04616.13^Glyco_hydro_43^Glycosyl hydrolases family 43^32-306^E:5.6e-24	.	KEGG:afv:AFLA_059500`KO:K06113	GO:0005576^cellular_component^extracellular region`GO:0046558^molecular_function^arabinan endo-1,5-alpha-L-arabinosidase activity`GO:0031222^biological_process^arabinan catabolic process`GO:0045493^biological_process^xylan catabolic process	GO:0004553^molecular_function^hydrolase activity, hydrolyzing O-glycosyl compounds`GO:0005975^biological_process^carbohydrate metabolic process
CBM51; GH35	#N/A	#N/A	LE01Gene04812	13.5875	12.3133	12.8947	11.788	11.7198	11.5169	-1.34636	0.000727551	0.00382799	LE01Gene04812	BGALB_ASPNC^BGALB_ASPNC^Q:1131-4082,H:42-1012^36.4%ID^E:5.1e-164^RecName: Full=Probable beta-galactosidase B	.	.	.	.	.
GH16	#N/A	#N/A	LE01Gene09786	14.9231	14.759	14.8687	13.7457	13.4615	13.1954	-1.36687	1.99e-14	1.47e-12	LE01Gene09786	YHZ7_SCHPO^YHZ7_SCHPO^Q:202-1119,H:114-418^40.2%ID^E:2e-61^RecName: Full=Probable glycosidase C21B10.07	.	.	.	.	.
GT1	#N/A	#N/A	LE01Gene13736	10.4706	11.066	10.0973	9.25083	9.08012	9.32277	-1.3807	0.000939101	0.00470551	LE01Gene13736	UFOG1_FRAAN^UFOG1_FRAAN^Q:772-1242,H:235-392^37.6%ID^E:8.2e-17^RecName: Full=Anthocyanidin 3-O-glucosyltransferase 1	PF00201.17^UDPGT^UDP-glucoronosyl and UDP-glucosyl transferase^297-426^E:4.1e-19	COG1819^Transferase	KEGG:ath:AT1G22340	GO:0043231^cellular_component^intracellular membrane-bounded organelle`GO:0015020^molecular_function^glucuronosyltransferase activity`GO:0080043^molecular_function^quercetin 3-O-glucosyltransferase activity`GO:0080044^molecular_function^quercetin 7-O-glucosyltransferase activity`GO:0008152^biological_process^metabolic process	GO:0016758^molecular_function^transferase activity, transferring hexosyl groups
CBM67	#N/A	#N/A	LE01Gene11861	16.8039	17.5312	17.3731	15.9372	16.5128	14.6242	-1.38364	0.00175927	0.00785924	LE01Gene11861	.	.	.	.	.	.
GH16	#N/A	#N/A	LE01Gene09459	8.78211	8.39255	8.64083	6.91616	7.02794	7.20627	-1.56628	0.000276657	0.00171951	LE01Gene09459	GUB_PAEPO^GUB_PAEPO^Q:889-1413,H:60-209^22.8%ID^E:2.7e-05^RecName: Full=Beta-glucanase	.	.	.	.	.
CBM13; GH95	#N/A	#N/A	LE01Gene05191	11.5632	11.2997	11.2495	9.71163	9.5692	10.0979	-1.56809	2.56e-07	4.2e-06	LE01Gene05191	FUCO2_ARATH^FUCO2_ARATH^Q:1622-3799,H:62-816^33%ID^E:3.6e-103^RecName: Full=Alpha-L-fucosidase 2	PF07690.15^MFS_1^Major Facilitator Superfamily^44-266^E:3.8e-11`PF07690.15^MFS_1^Major Facilitator Superfamily^258-418^E:3.2e-12	ENOG4110RR0^solute carrier family 16, member 8 (monocarboxylic acid transporter 3)	KEGG:gga:396041`KO:K08185	GO:0016021^cellular_component^integral component of membrane`GO:0005887^cellular_component^integral component of plasma membrane`GO:0015129^molecular_function^lactate transmembrane transporter activity`GO:0008028^molecular_function^monocarboxylic acid transmembrane transporter activity`GO:0015293^molecular_function^symporter activity	GO:0055085^biological_process^transmembrane transport`GO:0016021^cellular_component^integral component of membrane
GH27	#N/A	#N/A	LE01Gene06823	12.3222	11.0168	11.8349	10.216	10.0955	10.347	-1.59753	0.000167636	0.00113079	LE01Gene06823	AGALD_ASPOR^AGALD_ASPOR^Q:110-1675,H:24-656^38.2%ID^E:3.3e-99^RecName: Full=Probable alpha-galactosidase D	PF16499.4^Melibiase_2^Alpha galactosidase A^34-316^E:1.3e-52	.	KEGG:ang:ANI_1_276124`KO:K07407	GO:0005576^cellular_component^extracellular region`GO:0052692^molecular_function^raffinose alpha-galactosidase activity`GO:0000272^biological_process^polysaccharide catabolic process	GO:0004553^molecular_function^hydrolase activity, hydrolyzing O-glycosyl compounds`GO:0005975^biological_process^carbohydrate metabolic process
AA3	Lignin Degrading Auxiliary enzyme	aryl-alcohol oxidase	LE01Gene04836	11.0657	10.3088	11.3222	8.91558	9.76779	9.1785	-1.62811	1.7e-06	2.19e-05	LE01Gene04836	PDH1_AGABI^PDH1_AGABI^Q:934-2631,H:76-594^36%ID^E:1.5e-87^RecName: Full=Pyranose dehydrogenase {ECO:0000303|PubMed:11086703}	PF00732.18^GMC_oxred_N^GMC oxidoreductase^135-263^E:6.1e-24`PF05199.12^GMC_oxred_C^GMC oxidoreductase^363-504^E:2.3e-37	.	.	GO:0005576^cellular_component^extracellular region`GO:0050660^molecular_function^flavin adenine dinucleotide binding`GO:0033718^molecular_function^pyranose dehydrogenase (acceptor) activity`GO:0005975^biological_process^carbohydrate metabolic process	GO:0016614^molecular_function^oxidoreductase activity, acting on CH-OH group of donors`GO:0050660^molecular_function^flavin adenine dinucleotide binding`GO:0055114^biological_process^oxidation-reduction process
GH16_1	#N/A	#N/A	LE01Gene08682	9.75136	8.81052	8.45361	7.77495	7.15077	7.45585	-1.63521	4.56e-05	0.000373204	LE01Gene08682	EGLX_NEOFI^EGLX_NEOFI^Q:497-1456,H:14-338^40.4%ID^E:3.4e-54^RecName: Full=Probable endo-1,3(4)-beta-glucanase NFIA_089530	.	.	KEGG:nfi:NFIA_089530	GO:0031225^cellular_component^anchored component of membrane`GO:0005886^cellular_component^plasma membrane`GO:0052861^molecular_function^glucan endo-1,3-beta-glucanase activity, C-3 substituted reducing group`GO:0052862^molecular_function^glucan endo-1,4-beta-glucanase activity, C-3 substituted reducing group`GO:0030245^biological_process^cellulose catabolic process	.
GH43	#N/A	#N/A	LE01Gene06082	11.2588	9.89628	9.33935	9.34102	7.73234	8.76086	-1.64747	0.00230141	0.00980176	LE01Gene06082	ABNA_ASPNC^ABNA_ASPNC^Q:166-1080,H:5-320^42.4%ID^E:7.4e-58^RecName: Full=Probable arabinan endo-1,5-alpha-L-arabinosidase A	PF04616.13^Glyco_hydro_43^Glycosyl hydrolases family 43^82-358^E:1.9e-41	.	KEGG:ang:ANI_1_118084`KO:K06113	GO:0005576^cellular_component^extracellular region`GO:0046558^molecular_function^arabinan endo-1,5-alpha-L-arabinosidase activity`GO:0031222^biological_process^arabinan catabolic process`GO:2000895^biological_process^hemicellulose catabolic process`GO:0045493^biological_process^xylan catabolic process	GO:0004553^molecular_function^hydrolase activity, hydrolyzing O-glycosyl compounds`GO:0005975^biological_process^carbohydrate metabolic process
AA1	Lignin Oxidase	multicopper oxidase	LE01Gene05032	11.8182	12.1093	11.9943	10.2496	10.1796	10.024	-1.82557	1.3e-12	6.9e-11	LE01Gene05032	FER1_USTMA^FER1_USTMA^Q:134-1903,H:20-618^46.4%ID^E:6.6e-157^RecName: Full=Iron multicopper oxidase fer1 {ECO:0000303|PubMed:17138696}	PF07732.14^Cu-oxidase_3^Multicopper oxidase^32-147^E:3.6e-29`PF00394.21^Cu-oxidase^Multicopper oxidase^154-317^E:4.2e-34`PF07731.13^Cu-oxidase_2^Multicopper oxidase^410-517^E:6.5e-35	.	KEGG:uma:UMAG_00105`KO:K19791	GO:0033573^cellular_component^high-affinity iron permease complex`GO:0005507^molecular_function^copper ion binding`GO:0004322^molecular_function^ferroxidase activity`GO:0033215^biological_process^iron assimilation by reduction and transport`GO:0034755^biological_process^iron ion transmembrane transport`GO:0006826^biological_process^iron ion transport`GO:0009405^biological_process^pathogenesis	GO:0005507^molecular_function^copper ion binding`GO:0055114^biological_process^oxidation-reduction process`GO:0016491^molecular_function^oxidoreductase activity
GH27	#N/A	#N/A	LE01Gene09625	12.8975	11.6653	12.042	10.3461	10.3149	10.6466	-1.85376	9.84e-05	0.000726933	LE01Gene09625	AGALB_TALEM^AGALB_TALEM^Q:733-1890,H:21-449^42.2%ID^E:1.7e-94^RecName: Full=Probable alpha-galactosidase B	PF16499.4^Melibiase_2^Alpha galactosidase A^69-341^E:2e-55	.	.	GO:0005576^cellular_component^extracellular region`GO:0052692^molecular_function^raffinose alpha-galactosidase activity`GO:0005975^biological_process^carbohydrate metabolic process	GO:0004553^molecular_function^hydrolase activity, hydrolyzing O-glycosyl compounds`GO:0005975^biological_process^carbohydrate metabolic process
CBM1; GH5_5	Cellulase	Endo-beta-1,4-glucanase	LE01Gene12259	7.71262	7.15847	6.15963	5.19211	5.08147	5.60033	-1.86128	0.000528992	0.002952	LE01Gene12259	EG5A_PHACH^EG5A_PHACH^Q:608-1594,H:22-276^48%ID^E:1.2e-80^RecName: Full=Manganese dependent endoglucanase Eg5A {ECO:0000303|PubMed:26173955}	.	.	.	.	.
CBM60; GH11	Hemicellulase	Endo-1,4-beta-xylanase	LE01Gene02619	9.73746	8.13437	6.89621	7.04442	6.87003	6.53807	-1.8831	0.00139741	0.00650104	LE01Gene02619	XYNB_ASPKW^XYNB_ASPKW^Q:27-677,H:5-224^59.3%ID^E:1.5e-68^RecName: Full=Endo-1,4-beta-xylanase B	PF00457.16^Glyco_hydro_11^Glycosyl hydrolases family 11^48-224^E:6e-70	.	.	GO:0005576^cellular_component^extracellular region`GO:0031176^molecular_function^endo-1,4-beta-xylanase activity`GO:0045493^biological_process^xylan catabolic process	.
GH92	#N/A	#N/A	LE01Gene09210	13.0364	12.6729	12.6924	11.099	11.1814	10.3573	-1.88719	1.08e-10	3.97e-09	LE01Gene09210	A7629_ARTBC^A7629_ARTBC^Q:548-2710,H:46-717^33%ID^E:1.9e-96^RecName: Full=Uncharacterized secreted glycosidase ARB_07629 {ECO:0000305}	.	.	.	.	.
CBM20; CBM25; GH13	#N/A	#N/A	LE01Gene09188	12.9084	11.9496	11.9249	10.3606	10.489	10.3425	-1.93988	1.95e-07	3.26e-06	LE01Gene09188	AMY_STRLM^AMY_STRLM^Q:429-2096,H:29-565^45.6%ID^E:1.1e-129^RecName: Full=Alpha-amylase	.	.	.	.	.
GH51	#N/A	#N/A	LE01Gene06046	13.1326	11.6961	11.5934	10.5217	10.1868	10.3193	-1.9762	3.76e-05	0.000317462	LE01Gene06046	ABFA_ASPFN^ABFA_ASPFN^Q:180-1991,H:35-626^35.9%ID^E:1.3e-96^RecName: Full=Probable alpha-L-arabinofuranosidase A	PF06964.11^Alpha-L-AF_C^Alpha-L-arabinofuranosidase C-terminal domain^448-629^E:1.6e-32	COG3534^Alpha-N-arabinofuranosidase (EC 3.2.1.55)	.	GO:0046556^molecular_function^alpha-L-arabinofuranosidase activity`GO:0031222^biological_process^arabinan catabolic process`GO:0046373^biological_process^L-arabinose metabolic process	GO:0046556^molecular_function^alpha-L-arabinofuranosidase activity`GO:0046373^biological_process^L-arabinose metabolic process
PL4	#N/A	#N/A	LE01Gene10811	12.5141	11.6181	11.9323	10.0232	10.1295	10.0282	-2.01007	9.25e-12	4.06e-10	LE01Gene10811	RGLB_ASPFN^RGLB_ASPFN^Q:495-2417,H:14-662^43.1%ID^E:2.1e-144^RecName: Full=Probable rhamnogalacturonate lyase B	.	.	.	.	.
AA3	#N/A	#N/A	LE01Gene06189	9.78555	10.2766	10.1023	7.92691	8.61621	7.30381	-2.02495	7.82e-10	2.31e-08	LE01Gene06189	CITC_MONPU^CITC_MONPU^Q:218-1984,H:9-609^34.7%ID^E:2e-82^RecName: Full=Dehydrogenase mpl7 {ECO:0000303|PubMed:27913218}	PF00732.18^GMC_oxred_N^GMC oxidoreductase^40-351^E:2.4e-60`PF05199.12^GMC_oxred_C^GMC oxidoreductase^481-618^E:1.8e-33	.	.	GO:0050660^molecular_function^flavin adenine dinucleotide binding`GO:0016614^molecular_function^oxidoreductase activity, acting on CH-OH group of donors	GO:0016614^molecular_function^oxidoreductase activity, acting on CH-OH group of donors`GO:0050660^molecular_function^flavin adenine dinucleotide binding`GO:0055114^biological_process^oxidation-reduction process
GH16_10	#N/A	#N/A	LE01Gene11778	11.9355	10.427	10.0253	8.6988	8.40622	9.31344	-2.18983	0.000194629	0.00128409	LE01Gene11778	E3GAL_FLAVE^E3GAL_FLAVE^Q:590-952,H:129-249^73.6%ID^E:1.4e-49^RecName: Full=Galactan endo-beta-1,3-galactanase	.	.	.	.	.
CE12	#N/A	#N/A	LE01Gene06888	11.7881	10.1847	9.80029	8.88164	7.60205	8.39088	-2.4845	0.00167733	0.00753058	LE01Gene06888	RHA1_ASPAC^RHA1_ASPAC^Q:618-1334,H:7-242^49.6%ID^E:1.2e-56^RecName: Full=Rhamnogalacturonan acetylesterase	PF13472.5^Lipase_GDSL_2^GDSL-like Lipase/Acylhydrolase family^24-222^E:9.3e-10	.	KEGG:ag:CAA61858`KO:K15530	GO:0016787^molecular_function^hydrolase activity	.
CE16	#N/A	#N/A	LE01Gene11542	13.1038	11.2635	11.5597	9.8409	9.16758	9.95957	-2.52248	0.000693989	0.00368792	LE01Gene11542	AES1_MYCTT^AES1_MYCTT^Q:88-930,H:31-300^36.2%ID^E:1.9e-43^RecName: Full=Acetylesterase {ECO:0000250|UniProtKB:T2FKR1}	PF00657.21^Lipase_GDSL^GDSL-like Lipase/Acylhydrolase^33-228^E:5.4e-06`PF13472.5^Lipase_GDSL_2^GDSL-like Lipase/Acylhydrolase family^35-222^E:4.2e-09	.	.	.	GO:0016788^molecular_function^hydrolase activity, acting on ester bonds
CBM20; GH15	#N/A	#N/A	LE01Gene04186	12.7814	11.1951	11.8487	9.24639	9.58925	9.75748	-2.54456	0.000511561	0.00287394	LE01Gene04186	AMYG_SCHCM^AMYG_SCHCM^Q:909-2588,H:20-576^62.4%ID^E:4.7e-198^RecName: Full=Glucoamylase ARB_02327-1 {ECO:0000305}	.	.	.	.	.
GH27	#N/A	#N/A	LE01Gene05323	15.0807	13.9304	14.4641	12.2976	12.1693	11.0565	-2.63037	1.96e-09	5.27e-08	LE01Gene05323	AGAL3_HYPJE^AGAL3_HYPJE^Q:49-1383,H:167-618^49.2%ID^E:1.2e-117^RecName: Full=Alpha-galactosidase 3	PF16499.4^Melibiase_2^Alpha galactosidase A^36-124^E:1.3e-08`PF16499.4^Melibiase_2^Alpha galactosidase A^151-352^E:1.8e-08	ENOG410Y110^glycoside hydrolase family 27	.	GO:0005576^cellular_component^extracellular region`GO:0004557^molecular_function^alpha-galactosidase activity`GO:0052692^molecular_function^raffinose alpha-galactosidase activity`GO:0005975^biological_process^carbohydrate metabolic process	GO:0004553^molecular_function^hydrolase activity, hydrolyzing O-glycosyl compounds`GO:0005975^biological_process^carbohydrate metabolic process
GH71	#N/A	#N/A	LE01Gene06228	9.83699	8.56244	8.53366	6.33158	6.78408	6.25556	-2.65138	4.39e-09	1.09e-07	LE01Gene06228	MU71A_PENRW^MU71A_PENRW^Q:964-2274,H:28-433^41.8%ID^E:5e-82^RecName: Full=Mutanase Pc12g07500 {ECO:0000303|PubMed:24884713}	PF03659.13^Glyco_hydro_71^Glycosyl hydrolase family 71^50-447^E:2.5e-120	ENOG4111H6V^hydrolase family 71 protein	KEGG:pcs:Pc12g07500`KO:K08254	GO:0005576^cellular_component^extracellular region`GO:0051118^molecular_function^glucan endo-1,3-alpha-glucosidase activity`GO:0008152^biological_process^metabolic process	GO:0016787^molecular_function^hydrolase activity
GH28	#N/A	#N/A	LE01Gene01562	10.6557	9.41822	8.17326	6.93834	6.7194	7.35932	-2.73058	2.02e-08	4.28e-07	LE01Gene01562	RHGA_ASPAC^RHGA_ASPAC^Q:263-1114,H:39-356^31.7%ID^E:9.2e-36^RecName: Full=Rhamnogalacturonase A	PF00295.16^Glyco_hydro_28^Glycosyl hydrolases family 28^128-315^E:2.7e-31	.	KEGG:ani:AN9134.2`KO:K18580	GO:0005576^cellular_component^extracellular region`GO:0004650^molecular_function^polygalacturonase activity`GO:0046576^molecular_function^rhamnogalacturonan alpha-L-rhamnopyranosyl-(1->4)-alpha-D-galactopyranosyluronide lyase activity`GO:0071555^biological_process^cell wall organization`GO:0045490^biological_process^pectin catabolic process	GO:0004650^molecular_function^polygalacturonase activity`GO:0005975^biological_process^carbohydrate metabolic process
PL1	Pectinase	pectate lyase	LE01Gene12358	11.1883	9.227	8.39766	7.59813	7.01722	7.25587	-2.78741	1.03e-05	0.000106112	LE01Gene12358	PLYC_ASPFU^PLYC_ASPFU^Q:763-1851,H:1-365^36.5%ID^E:4e-42^RecName: Full=Probable pectate lyase C	.	.	.	.	.
CBM1; GH10	Hemicellulase	Endo-1,4-beta-xylanase	LE01Gene03223	12.8526	10.3414	9.47877	8.50061	8.71242	8.62025	-3.00414	0.00224441	0.00959043	LE01Gene03223	XYNC_PHACH^XYNC_PHACH^Q:360-1553,H:1-399^71.4%ID^E:1.2e-156^RecName: Full=Endo-1,4-beta-xylanase C	.	.	.	.	.
GH18	#N/A	#N/A	LE01Gene09723	11.9121	9.43971	9.37704	7.91578	7.71917	7.09077	-3.15317	1.04e-07	1.87e-06	LE01Gene09723	CHI33_ARTBC^CHI33_ARTBC^Q:1119-1817,H:114-323^24.3%ID^E:6.7e-05^RecName: Full=Class III chitinase ARB_03514 {ECO:0000305}	.	.	.	.	.
GH76	#N/A	#N/A	LE01Gene10232	11.7248	9.93255	10.7933	8.29248	6.99553	7.31321	-3.36005	4e-10	1.28e-08	LE01Gene10232	.	.	.	.	.	.
PL1	Pectinase	pectate lyase	LE01Gene04946	14.9464	11.4821	9.95367	9.27718	10.6667	10.2154	-3.36757	0.000441916	0.00254004	LE01Gene04946	PLYA_ASPNG^PLYA_ASPNG^Q:871-1800,H:13-323^57.5%ID^E:8.6e-83^RecName: Full=Pectate lyase A	.	.	.	.	.
AA1	Lignin Oxidase	multicopper oxidase	LE01Gene13044	11.9838	12.1283	10.4187	7.50459	8.72894	8.39973	-3.39476	0.000785761	0.00407738	LE01Gene13044	LAC5_TRAVI^LAC5_TRAVI^Q:34-1602,H:6-527^62.2%ID^E:9e-182^RecName: Full=Laccase-5	.	.	.	.	.
AA1	Lignin Oxidase	multicopper oxidase	LE01Gene01372	12.8297	12.5015	11.5205	8.94327	9.28399	7.84093	-3.57678	9.18e-07	1.28e-05	LE01Gene01372	LAC4_TRAVE^LAC4_TRAVE^Q:1120-2766,H:4-520^63.1%ID^E:2e-199^RecName: Full=Laccase-4	PF07732.14^Cu-oxidase_3^Multicopper oxidase^33-151^E:1e-33`PF00394.21^Cu-oxidase^Multicopper oxidase^164-260^E:1.1e-30`PF07731.13^Cu-oxidase_2^Multicopper oxidase^403-526^E:6.4e-37	.	.	GO:0005576^cellular_component^extracellular region`GO:0005507^molecular_function^copper ion binding`GO:0052716^molecular_function^hydroquinone:oxygen oxidoreductase activity`GO:0046274^biological_process^lignin catabolic process	GO:0005507^molecular_function^copper ion binding`GO:0055114^biological_process^oxidation-reduction process`GO:0016491^molecular_function^oxidoreductase activity
GH76	#N/A	#N/A	LE01Gene02160	12.7701	11.1719	11.4282	8.36797	8.2177	8.29924	-3.67948	2.34e-12	1.16e-10	LE01Gene02160	DCW1_YEAST^DCW1_YEAST^Q:47-1015,H:6-316^25.7%ID^E:5.5e-13^RecName: Full=Mannan endo-1,6-alpha-mannosidase DCW1	PF03663.13^Glyco_hydro_76^Glycosyl hydrolase family 76^50-214^E:4.6e-12`PF03663.13^Glyco_hydro_76^Glycosyl hydrolase family 76^234-390^E:9.2e-19	.	.	.	.
AA9	Cellulase	Endo-beta-1,4-glucanase	LE01Gene02255	12.229	8.89779	7.63755	6.57756	7.51326	6.97709	-3.77013	0.000859972	0.00438985	LE01Gene02255	CEL1_AGABI^CEL1_AGABI^Q:10-732,H:17-254^50.6%ID^E:2.5e-66^RecName: Full=Cellulose-growth-specific protein	PF03443.13^Glyco_hydro_61^Glycosyl hydrolase family 61^23-236^E:4.4e-56	.	.	GO:0005576^cellular_component^extracellular region`GO:0030248^molecular_function^cellulose binding`GO:0016798^molecular_function^hydrolase activity, acting on glycosyl bonds`GO:0030245^biological_process^cellulose catabolic process	.
CBM1; GH5	#N/A	#N/A	LE01Gene05890	13.1888	10.5966	9.2383	8.2532	7.74539	8.01809	-3.88788	0.000110483	0.000800916	LE01Gene05890	MANF_EMENI^MANF_EMENI^Q:531-1856,H:1-433^44%ID^E:1.6e-83^RecName: Full=Probable mannan endo-1,4-beta-mannosidase F	PF00734.17^CBM_1^Fungal cellulose binding domain^26-53^E:1.9e-12`PF00150.17^Cellulase^Cellulase (glycosyl hydrolase family 5)^124-408^E:6.1e-28	.	KEGG:ani:AN9276.2`KO:K19355	GO:0005576^cellular_component^extracellular region`GO:0030248^molecular_function^cellulose binding`GO:0016985^molecular_function^mannan endo-1,4-beta-mannosidase activity`GO:0046355^biological_process^mannan catabolic process	GO:0030248^molecular_function^cellulose binding`GO:0005975^biological_process^carbohydrate metabolic process`GO:0005576^cellular_component^extracellular region`GO:0004553^molecular_function^hydrolase activity, hydrolyzing O-glycosyl compounds
CBM1; CBM13; CBM2; GH74	#N/A	#N/A	LE01Gene07273	12.6528	10.0285	8.27437	7.73749	6.7061	7.58564	-3.94192	0.000395565	0.00232272	LE01Gene07273	XG74_HYPJQ^XG74_HYPJQ^Q:329-2815,H:5-838^56.3%ID^E:2.7e-241^RecName: Full=Xyloglucanase {ECO:0000303|PubMed:15541296}	.	.	.	.	.
AA9; CBM1	Cellulase	Endo-beta-1,4-glucanase	LE01Gene09249	13.1896	9.73183	6.6854	6.88223	7.37731	7.67585	-4.40545	0.000350307	0.00209272	LE01Gene09249	CEL1_AGABI^CEL1_AGABI^Q:47-976,H:18-320^62.6%ID^E:5.1e-106^RecName: Full=Cellulose-growth-specific protein	PF03443.13^Glyco_hydro_61^Glycosyl hydrolase family 61^19-235^E:6.5e-53`PF00734.17^CBM_1^Fungal cellulose binding domain^283-311^E:1.6e-11	.	.	GO:0005576^cellular_component^extracellular region`GO:0030248^molecular_function^cellulose binding`GO:0016798^molecular_function^hydrolase activity, acting on glycosyl bonds`GO:0030245^biological_process^cellulose catabolic process	GO:0030248^molecular_function^cellulose binding`GO:0005975^biological_process^carbohydrate metabolic process`GO:0005576^cellular_component^extracellular region
CBM1; GH7	Cellulase	1,4-beta-cellobiosidase	LE01Gene07961	13.4116	11.6347	9.44762	7.71839	8.17974	7.26558	-4.50298	1.01e-08	2.31e-07	LE01Gene07961	GUX1_PHACH^GUX1_PHACH^Q:25-1383,H:1-446^63.4%ID^E:6.7e-164^RecName: Full=Exoglucanase 1	.	.	.	.	.
CBM1; GH7	Cellulase	1,4-beta-cellobiosidase	LE01Gene12864	14.6089	10.6587	10.9107	8.64249	6.60946	9.4896	-4.55552	0.00010089	0.000741831	LE01Gene12864	GUX2_AGABI^GUX2_AGABI^Q:837-2195,H:1-450^62.8%ID^E:2.7e-167^RecName: Full=Exoglucanase	PF00840.19^Glyco_hydro_7^Glycosyl hydrolase family 7^22-453^E:4.1e-200	.	.	GO:0005576^cellular_component^extracellular region`GO:0016162^molecular_function^cellulose 1,4-beta-cellobiosidase activity`GO:0030248^molecular_function^cellulose binding`GO:0030245^biological_process^cellulose catabolic process	GO:0004553^molecular_function^hydrolase activity, hydrolyzing O-glycosyl compounds`GO:0005975^biological_process^carbohydrate metabolic process
GH28	Pectinase	polygalacturonase	LE01Gene06016	14.4816	12.4104	10.5177	9.36987	7.13101	7.82788	-4.85936	6.15e-05	0.000484164	LE01Gene06016	PGLR1_ASPAC^PGLR1_ASPAC^Q:172-1155,H:29-366^34.6%ID^E:1.3e-36^RecName: Full=Endopolygalacturonase I	.	.	.	.	.
CBM1; GH5	#N/A	#N/A	LE01Gene11268	13.6508	11.0413	9.51491	6.41305	7.40225	7.82788	-5.03574	4.33e-05	0.000359427	LE01Gene11268	MANF_EMENI^MANF_EMENI^Q:1-1323,H:1-433^41.8%ID^E:3.5e-67^RecName: Full=Probable mannan endo-1,4-beta-mannosidase F	PF00734.17^CBM_1^Fungal cellulose binding domain^25-52^E:6e-12`PF00150.17^Cellulase^Cellulase (glycosyl hydrolase family 5)^111-406^E:9.9e-28	.	KEGG:afv:AFLA_069870`KO:K19355	GO:0005576^cellular_component^extracellular region`GO:0030248^molecular_function^cellulose binding`GO:0016985^molecular_function^mannan endo-1,4-beta-mannosidase activity`GO:0005975^biological_process^carbohydrate metabolic process	GO:0030248^molecular_function^cellulose binding`GO:0005975^biological_process^carbohydrate metabolic process`GO:0005576^cellular_component^extracellular region`GO:0004553^molecular_function^hydrolase activity, hydrolyzing O-glycosyl compounds
CBM20; GH15	#N/A	#N/A	LE01Gene04190	14.9902	13.7278	13.9916	8.64586	9.15051	9.607	-5.15981	2.78e-29	8.8e-27	LE01Gene04190	AMYG_SCHCM^AMYG_SCHCM^Q:43-1725,H:18-576^62.7%ID^E:3.4e-199^RecName: Full=Glucoamylase ARB_02327-1 {ECO:0000305}	PF00723.20^Glyco_hydro_15^Glycosyl hydrolases family 15^34-447^E:1.5e-93`PF00686.18^CBM_20^Starch binding domain^481-569^E:1.6e-27	COG3387^glycoside hydrolase 15-related	KEGG:scm:SCHCODRAFT_57589`KO:K01178	GO:0005576^cellular_component^extracellular region`GO:0004339^molecular_function^glucan 1,4-alpha-glucosidase activity`GO:2001070^molecular_function^starch binding`GO:0000272^biological_process^polysaccharide catabolic process	GO:2001070^molecular_function^starch binding
CBM1; GH131	#N/A	#N/A	LE01Gene03370	12.7611	8.99335	6.50046	5.71329	5.78452	6.52194	-5.26205	0.000186463	0.00124072	LE01Gene03370	CBHB_ASPFC^CBHB_ASPFC^Q:941-1039,H:501-532^69.7%ID^E:3.7e-06^RecName: Full=Probable 1,4-beta-D-glucan cellobiohydrolase B	PF00734.17^CBM_1^Fungal cellulose binding domain^313-341^E:5.2e-11	.	.	GO:0005576^cellular_component^extracellular region`GO:0016162^molecular_function^cellulose 1,4-beta-cellobiosidase activity`GO:0030248^molecular_function^cellulose binding`GO:0030245^biological_process^cellulose catabolic process	GO:0030248^molecular_function^cellulose binding`GO:0005975^biological_process^carbohydrate metabolic process`GO:0005576^cellular_component^extracellular region
AA9	Cellulase	Endo-beta-1,4-glucanase	LE01Gene10266	12.8611	8.26704	5.32388	5.03628	4.04116	3.74362	-7.0268	1.65e-06	2.13e-05	LE01Gene10266	EGLD_NEOFI^EGLD_NEOFI^Q:62-841,H:2-234^31.9%ID^E:2.8e-20^RecName: Full=Probable endo-beta-1,4-glucanase D	PF03443.13^Glyco_hydro_61^Glycosyl hydrolase family 61^23-219^E:1.5e-52	.	KEGG:nfi:NFIA_099510`KO:K19356	GO:0005576^cellular_component^extracellular region`GO:0008810^molecular_function^cellulase activity`GO:0030248^molecular_function^cellulose binding`GO:0030245^biological_process^cellulose catabolic process	.
GH15	#N/A	#N/A	LE01Gene04370	8.75476	7.27607	8.11001	0.1	0.1	2.624	-7.39034	0.00201523	0.00881738	LE01Gene04370	AMYG_SCHCM^AMYG_SCHCM^Q:43-1227,H:18-496^48.1%ID^E:6.2e-102^RecName: Full=Glucoamylase ARB_02327-1 {ECO:0000305}	PF00723.20^Glyco_hydro_15^Glycosyl hydrolases family 15^153-362^E:3.9e-29	COG3387^glycoside hydrolase 15-related	KEGG:scm:SCHCODRAFT_57589`KO:K01178	GO:0005576^cellular_component^extracellular region`GO:0004339^molecular_function^glucan 1,4-alpha-glucosidase activity`GO:2001070^molecular_function^starch binding`GO:0000272^biological_process^polysaccharide catabolic process	.

## Sheet: ow_3-VS-cs_3
CAZyme_family	Class	Gene name	Gene_id	cs_3_a	cs_3_b	cs_3_c	ow_3_a	ow_3_b	ow_3_c	log2FoldChange	pvalue	padj	id	sprot_Top_BLASTX_hit	Pfam	eggnog	Kegg	gene_ontology_blast	gene_ontology_pfam
AA7	#N/A	#N/A	LE01Gene09065	5.31549	5.14261	5.02198	8.05492	10.9044	6.16072	4.42734	4.96e-07	1.14e-05	LE01Gene09065	SORD_PENRW^SORD_PENRW^Q:163-1560,H:17-467^29.4%ID^E:5.1e-44^RecName: Full=FAD-linked oxidoreductase sorD {ECO:0000303|PubMed:28618182}	.	.	.	.	.
GH18	#N/A	#N/A	LE01Gene04647	8.74569	8.3187	8.70048	11.5497	13.9557	9.5162	4.07791	8.23e-08	2.39e-06	LE01Gene04647	.	PF00704.27^Glyco_hydro_18^Glycosyl hydrolases family 18^64-301^E:9.8e-15	.	.	.	GO:0005975^biological_process^carbohydrate metabolic process
CBM50	#N/A	#N/A	LE01Gene04217	7.29922	7.59565	8.41217	8.72735	13.0617	9.84399	3.84416	2.36e-06	4.31e-05	LE01Gene04217	LYSM4_ARTBC^LYSM4_ARTBC^Q:387-590,H:303-375^37%ID^E:6.1e-06^RecName: Full=LysM domain-containing protein ARB_03442 {ECO:0000305}	PF01476.19^LysM^LysM domain^39-84^E:1.6e-11`PF01476.19^LysM^LysM domain^96-135^E:3.6e-07	.	.	.	.
GH128	#N/A	#N/A	LE01Gene03896	8.2085	8.88639	9.04263	10.7701	13.4712	11.7879	3.68487	4.75e-11	2.62e-09	LE01Gene03896	ASL1_SCHPO^ASL1_SCHPO^Q:52-768,H:296-529^33.6%ID^E:2.1e-30^RecName: Full=Alkali-sensitive linkage protein 1	PF11790.7^Glyco_hydro_cc^Glycosyl hydrolase catalytic core^20-255^E:1.8e-71	.	.	.	.
AA2	Lignin Oxidase	Manganese peroxidase	LE01Gene08997	13.7817	10.7881	14.6136	17.9895	17.0906	15.1075	3.41058	8.68e-06	0.000133099	LE01Gene08997	PEM2_PHLRA^PEM2_PHLRA^Q:1487-2656,H:5-390^63.4%ID^E:1.1e-135^RecName: Full=Manganese peroxidase 2	PF00141.22^peroxidase^Peroxidase^174-407^E:8.9e-26`PF11895.7^Peroxidase_ext^Fungal peroxidase extension region^413-489^E:1.9e-29	.	KEGG:ag:CAC85963`KO:K20205	GO:0005576^cellular_component^extracellular region`GO:0020037^molecular_function^heme binding`GO:0016689^molecular_function^manganese peroxidase activity`GO:0046872^molecular_function^metal ion binding`GO:0042744^biological_process^hydrogen peroxide catabolic process`GO:0046274^biological_process^lignin catabolic process`GO:0006979^biological_process^response to oxidative stress	GO:0004601^molecular_function^peroxidase activity`GO:0020037^molecular_function^heme binding`GO:0006979^biological_process^response to oxidative stress`GO:0055114^biological_process^oxidation-reduction process
CBM50	#N/A	#N/A	LE01Gene04605	8.83272	8.42294	9.70069	11.5131	12.3239	12.4585	3.07027	1.9e-15	2.02e-13	LE01Gene04605	.	PF01476.19^LysM^LysM domain^32-77^E:5.8e-12`PF01476.19^LysM^LysM domain^82-122^E:1.4e-07	.	.	.	.
AA7	#N/A	#N/A	LE01Gene13975	11.5057	10.3317	12.7791	14.7204	15.4922	13.8712	2.97221	4.84e-08	1.45e-06	LE01Gene13975	A2372_ARTBC^A2372_ARTBC^Q:1183-2478,H:53-499^29.3%ID^E:1.5e-41^RecName: Full=Uncharacterized FAD-linked oxidoreductase ARB_02372 {ECO:0000305}	.	.	.	.	.
GH28	#N/A	#N/A	LE01Gene08349	7.24256	6.95114	6.86843	8.51809	6.65705	11.2416	2.89145	2.59e-05	0.000342274	LE01Gene08349	PGLR1_ASPNC^PGLR1_ASPNC^Q:10-963,H:6-357^27.9%ID^E:4.8e-16^RecName: Full=Probable endopolygalacturonase I	PF00295.16^Glyco_hydro_28^Glycosyl hydrolases family 28^46-187^E:4.8e-16`PF00295.16^Glyco_hydro_28^Glycosyl hydrolases family 28^192-321^E:3.2e-17	.	.	GO:0005576^cellular_component^extracellular region`GO:0004650^molecular_function^polygalacturonase activity`GO:0071555^biological_process^cell wall organization`GO:0045490^biological_process^pectin catabolic process	GO:0004650^molecular_function^polygalacturonase activity`GO:0005975^biological_process^carbohydrate metabolic process
AA3	Lignin Degrading Auxiliary enzyme	alcohol oxidase	LE01Gene10868	14.7867	13.5145	16.09	18.4074	18.3592	16.8573	2.871	5.98e-08	1.77e-06	LE01Gene10868	ALOX1_KOMPC^ALOX1_KOMPC^Q:38-1963,H:1-637^49.4%ID^E:1.1e-176^RecName: Full=Alcohol oxidase 1	.	.	.	.	.
GH13	#N/A	#N/A	LE01Gene04133	7.56258	7.39629	8.22421	10.6639	10.3442	10.3339	2.68776	1.11e-26	3.41e-24	LE01Gene04133	AMT6_BACS7^AMT6_BACS7^Q:359-1843,H:30-518^48.2%ID^E:1.8e-133^RecName: Full=Glucan 1,4-alpha-maltohexaosidase	PF00128.23^Alpha-amylase^Alpha amylase, catalytic domain^43-389^E:1.7e-21`PF09154.9^DUF1939^Domain of unknown function (DUF1939)^442-495^E:2.1e-05	.	.	GO:0005576^cellular_component^extracellular region`GO:0005509^molecular_function^calcium ion binding`GO:0033927^molecular_function^glucan 1,4-alpha-maltohexaosidase activity`GO:0005983^biological_process^starch catabolic process	GO:0003824^molecular_function^catalytic activity`GO:0005975^biological_process^carbohydrate metabolic process`GO:0004553^molecular_function^hydrolase activity, hydrolyzing O-glycosyl compounds
AA2	Lignin Oxidase	Manganese peroxidase	LE01Gene09060	8.85557	8.17553	9.78587	12.2203	11.6489	10.0282	2.46718	9.93e-06	0.000150148	LE01Gene09060	PEM2_PHLRA^PEM2_PHLRA^Q:1-1191,H:1-374^62.3%ID^E:8.5e-133^RecName: Full=Manganese peroxidase 2	PF00141.22^peroxidase^Peroxidase^55-307^E:3.5e-27`PF11895.7^Peroxidase_ext^Fungal peroxidase extension region^313-389^E:1.9e-30	.	KEGG:ag:CAC85963`KO:K20205	GO:0005576^cellular_component^extracellular region`GO:0020037^molecular_function^heme binding`GO:0016689^molecular_function^manganese peroxidase activity`GO:0046872^molecular_function^metal ion binding`GO:0042744^biological_process^hydrogen peroxide catabolic process`GO:0046274^biological_process^lignin catabolic process`GO:0006979^biological_process^response to oxidative stress	GO:0004601^molecular_function^peroxidase activity`GO:0020037^molecular_function^heme binding`GO:0006979^biological_process^response to oxidative stress`GO:0055114^biological_process^oxidation-reduction process
GH152	#N/A	#N/A	LE01Gene05009	9.10161	8.48289	8.95707	8.68711	12.4791	9.41485	2.27925	0.000271103	0.00241024	LE01Gene05009	TLP1_PYRPY^TLP1_PYRPY^Q:656-1402,H:9-244^39.9%ID^E:2.6e-43^RecName: Full=Thaumatin-like protein 1	.	.	.	.	.
GH28	#N/A	#N/A	LE01Gene03020	11.156	9.77268	11.3431	13.5019	11.445	13.4843	2.168	3.66e-05	0.000457208	LE01Gene03020	PGLRX_COCCA^PGLRX_COCCA^Q:139-1359,H:3-426^42.5%ID^E:7.4e-84^RecName: Full=Exopolygalacturonase	PF00295.16^Glyco_hydro_28^Glycosyl hydrolases family 28^53-385^E:9.5e-69	.	.	GO:0005576^cellular_component^extracellular region`GO:0047911^molecular_function^galacturan 1,4-alpha-galacturonidase activity`GO:0004650^molecular_function^polygalacturonase activity`GO:0005975^biological_process^carbohydrate metabolic process`GO:0071555^biological_process^cell wall organization	GO:0004650^molecular_function^polygalacturonase activity`GO:0005975^biological_process^carbohydrate metabolic process
AA5	Lignin Degrading Auxiliary enzyme	Glyoxal oxidase	LE01Gene02092	13.7785	12.2087	14.5325	16.8602	15.7012	14.1584	2.16511	0.000113553	0.0011832	LE01Gene02092	GLOX_PHACH^GLOX_PHACH^Q:491-2146,H:3-556^59.3%ID^E:3.9e-190^RecName: Full=Aldehyde oxidase GLOX {ECO:0000305}	PF07250.10^Glyoxal_oxid_N^Glyoxal oxidase N-terminus^233-445^E:2.9e-30`PF09118.10^DUF1929^Domain of unknown function (DUF1929)^609-708^E:1.5e-22	.	KEGG:ag:AAA33747`KO:K20929	GO:0005615^cellular_component^extracellular space`GO:0004031^molecular_function^aldehyde oxidase activity`GO:0102797^molecular_function^geranial:oxygen oxidoreductase activity`GO:0102798^molecular_function^heptaldehyde:oxygen oxidoreductase activity`GO:0050665^biological_process^hydrogen peroxide biosynthetic process	.
GH28	#N/A	#N/A	LE01Gene02894	9.17005	6.7705	9.44306	11.4657	9.34415	11.3787	2.15524	0.000578798	0.00444221	LE01Gene02894	RGXA_ASPFN^RGXA_ASPFN^Q:225-995,H:27-283^41.6%ID^E:1.4e-48^RecName: Full=Putative galacturan 1,4-alpha-galacturonidase A	.	.	.	.	.
GH93	#N/A	#N/A	LE01Gene03844	8.45784	6.83764	8.41217	11.1416	8.58706	9.55863	2.07931	0.000323755	0.00277698	LE01Gene03844	.	.	.	.	.	.
GT25	#N/A	#N/A	LE01Gene05153	8.64436	7.9932	8.09368	10.5895	10.8211	8.87943	2.04547	6.87e-07	1.49e-05	LE01Gene05153	GT251_DANRE^GT251_DANRE^Q:1316-1840,H:387-574^28.6%ID^E:7.3e-10^RecName: Full=Procollagen galactosyltransferase 1	.	.	.	.	.
CBM13	#N/A	#N/A	LE01Gene10858	12.0776	12.6852	12.436	12.6813	15.2297	14.2004	1.95603	2.42e-05	0.00032359	LE01Gene10858	.	PF14200.5^RicinB_lectin_2^Ricin-type beta-trefoil lectin domain-like^46-116^E:9.8e-08	.	.	.	.
GH75	#N/A	#N/A	LE01Gene12054	8.84799	9.50792	9.32406	10.887	11.7764	9.80766	1.7845	2.58e-05	0.000341588	LE01Gene12054	CSNC_ASPOZ^CSNC_ASPOZ^Q:353-961,H:42-247^49%ID^E:8.7e-48^RecName: Full=Endo-chitosanase C	PF07335.10^Glyco_hydro_75^Fungal chitosanase of glycosyl hydrolase group 75^177-291^E:1.7e-35	.	.	GO:0005576^cellular_component^extracellular region`GO:0016977^molecular_function^chitosanase activity`GO:0000272^biological_process^polysaccharide catabolic process	GO:0016977^molecular_function^chitosanase activity
AA7	#N/A	#N/A	LE01Gene00015	8.16648	7.87032	7.88987	8.02588	9.4697	10.6613	1.77575	0.000179778	0.0016991	LE01Gene00015	A2372_ARTBC^A2372_ARTBC^Q:326-1540,H:63-462^29.5%ID^E:3.7e-34^RecName: Full=Uncharacterized FAD-linked oxidoreductase ARB_02372 {ECO:0000305}	PF01565.22^FAD_binding_4^FAD binding domain^86-220^E:1.1e-20	COG0277^FAD linked oxidase domain protein	KEGG:abe:ARB_02372	GO:0005576^cellular_component^extracellular region`GO:0071949^molecular_function^FAD binding`GO:0016491^molecular_function^oxidoreductase activity	GO:0016491^molecular_function^oxidoreductase activity`GO:0050660^molecular_function^flavin adenine dinucleotide binding`GO:0055114^biological_process^oxidation-reduction process
CE8	#N/A	#N/A	LE01Gene04913	9.84262	8.61123	10.2792	11.9682	10.2846	11.7593	1.77427	0.000178327	0.00168948	LE01Gene04913	URIC_EMENI^URIC_EMENI^Q:34-624,H:66-241^43.5%ID^E:6.1e-31^RecName: Full=Uricase	PF01014.17^Uricase^Uricase^27-81^E:5.6e-07`PF01014.17^Uricase^Uricase^102-215^E:5.4e-21`PF01095.18^Pectinesterase^Pectinesterase^451-669^E:2.5e-31	.	KEGG:ani:AN9470.2`KO:K00365	GO:0005576^cellular_component^extracellular region`GO:0005777^cellular_component^peroxisome`GO:0004846^molecular_function^urate oxidase activity`GO:0006145^biological_process^purine nucleobase catabolic process`GO:0019628^biological_process^urate catabolic process	GO:0030599^molecular_function^pectinesterase activity`GO:0042545^biological_process^cell wall modification`GO:0005618^cellular_component^cell wall
GH18	#N/A	#N/A	LE01Gene05686	10.8207	8.93931	9.96701	12.3528	11.7944	10.955	1.70714	0.000665429	0.00496143	LE01Gene05686	CHIA1_BACCI^CHIA1_BACCI^Q:672-1961,H:133-464^23%ID^E:1.2e-20^RecName: Full=Chitinase A1	PF00787.23^PX^PX domain^30-131^E:1.7e-14`PF00704.27^Glyco_hydro_18^Glycosyl hydrolases family 18^186-606^E:8.1e-56	COG3325^chitinase	KEGG:hsa:1118`KO:K01183	GO:0005576^cellular_component^extracellular region`GO:0005615^cellular_component^extracellular space`GO:0005764^cellular_component^lysosome`GO:0035580^cellular_component^specific granule lumen`GO:1904724^cellular_component^tertiary granule lumen`GO:0008061^molecular_function^chitin binding`GO:0004568^molecular_function^chitinase activity`GO:0008843^molecular_function^endochitinase activity`GO:000…	GO:0035091^molecular_function^phosphatidylinositol binding`GO:0005975^biological_process^carbohydrate metabolic process
GH76	#N/A	#N/A	LE01Gene10275	8.19064	7.64895	8.14617	9.16569	10.4288	9.01027	1.67336	8.52e-07	1.8e-05	LE01Gene10275	.	.	.	.	.	.
GH79	#N/A	#N/A	LE01Gene00946	9.51918	8.09549	10.0942	11.9074	10.095	10.7655	1.66994	0.000644558	0.004846	LE01Gene00946	GUS79_ASPNC^GUS79_ASPNC^Q:175-1743,H:31-541^26%ID^E:7e-26^RecName: Full=Beta-glucuronidase {ECO:0000303|PubMed:18377882}	.	.	.	.	.
GH28	#N/A	#N/A	LE01Gene12986	11.3135	10.9546	12.0483	12.9498	13.0106	13.495	1.6609	4.35e-05	0.000525345	LE01Gene12986	RGXB_ASPNC^RGXB_ASPNC^Q:396-1595,H:33-417^51%ID^E:7.6e-110^RecName: Full=Alpha-L-rhamnosidase rgxB	PF00295.16^Glyco_hydro_28^Glycosyl hydrolases family 28^95-406^E:1.5e-38	.	KEGG:ang:ANI_1_1122034	GO:0005576^cellular_component^extracellular region`GO:0030596^molecular_function^alpha-L-rhamnosidase activity`GO:0004650^molecular_function^polygalacturonase activity`GO:0071555^biological_process^cell wall organization`GO:0000272^biological_process^polysaccharide catabolic process	GO:0004650^molecular_function^polygalacturonase activity`GO:0005975^biological_process^carbohydrate metabolic process
GH115	#N/A	#N/A	LE01Gene05655	11.8188	11.5264	12.4621	14.4381	12.2357	13.4757	1.65439	0.000119841	0.00123659	LE01Gene05655	.	.	.	.	.	.
GH16	#N/A	#N/A	LE01Gene09781	12.2914	13.1056	12.784	13.9144	14.8863	13.9931	1.57096	4.4e-07	1.04e-05	LE01Gene09781	EGLX_ASPFC^EGLX_ASPFC^Q:168-1085,H:18-327^43.2%ID^E:4e-61^RecName: Full=Probable endo-1,3(4)-beta-glucanase AFUB_029980	.	.	.	.	.
CE4	#N/A	#N/A	LE01Gene01633	9.10479	8.98741	9.30879	10.3805	11.1286	10.4855	1.56629	4.15e-07	9.87e-06	LE01Gene01633	CDA_CRYNH^CDA_CRYNH^Q:147-1112,H:25-337^46.2%ID^E:8.4e-73^RecName: Full=Chitin deacetylase	.	.	.	.	.
GH26	#N/A	#N/A	LE01Gene13721	7.67818	6.53189	7.27689	8.23316	9.18549	8.51817	1.47377	0.000138805	0.0013858	LE01Gene13721	.	PF02156.14^Glyco_hydro_26^Glycosyl hydrolase family 26^152-276^E:2.8e-06	.	.	.	GO:0004553^molecular_function^hydrolase activity, hydrolyzing O-glycosyl compounds
GT3	#N/A	#N/A	LE01Gene01015	12.2113	12.2577	11.8196	13.1385	13.6995	13.7924	1.46203	2.13e-10	1.05e-08	LE01Gene01015	GYS_NEUCR^GYS_NEUCR^Q:86-2161,H:7-688^67.9%ID^E:4.1e-283^RecName: Full=Glycogen [starch] synthase	PF05693.12^Glycogen_syn^Glycogen synthase^40-684^E:0`PF08323.10^Glyco_transf_5^Starch synthase catalytic domain^42-273^E:3.8e-06	.	KEGG:ncr:NCU06687`KO:K00693	GO:0004373^molecular_function^glycogen (starch) synthase activity`GO:0005978^biological_process^glycogen biosynthetic process	GO:0004373^molecular_function^glycogen (starch) synthase activity`GO:0005978^biological_process^glycogen biosynthetic process
CBM48; GH13_8	#N/A	#N/A	LE01Gene07209	11.6796	11.5954	11.4286	12.4146	13.3195	13.1774	1.45028	1.32e-06	2.57e-05	LE01Gene07209	GLGB_RHIID^GLGB_RHIID^Q:165-2231,H:16-681^68.5%ID^E:4.2e-296^RecName: Full=1,4-alpha-glucan-branching enzyme	PF02922.17^CBM_48^Carbohydrate-binding module 48 (Isoamylase N-terminal domain)^55-140^E:5.4e-19`PF00128.23^Alpha-amylase^Alpha amylase, catalytic domain^207-278^E:6.1e-10`PF02806.17^Alpha-amylase_C^Alpha amylase, C-terminal all-beta domain^586-699^E:1.8e-19	.	.	GO:0003844^molecular_function^1,4-alpha-glucan branching enzyme activity`GO:0102752^molecular_function^1,4-alpha-glucan branching enzyme activity (using a glucosylated glycogenin as primer for glycogen synthesis)`GO:0043169^molecular_function^cation binding`GO:0004553^molecular_function^hydrolase activity, hydrolyzing O-glycosyl compounds`GO:0005978^biological_process^glycogen biosynthetic process	GO:0004553^molecular_function^hydrolase activity, hydrolyzing O-glycosyl compounds`GO:0005975^biological_process^carbohydrate metabolic process`GO:0003824^molecular_function^catalytic activity`GO:0043169^molecular_function^cation binding
GH37	#N/A	#N/A	LE01Gene13906	9.69628	9.74322	9.91249	11.1046	11.5813	10.7555	1.40101	1.19e-07	3.27e-06	LE01Gene13906	TREA_DICDI^TREA_DICDI^Q:323-2140,H:82-594^32.5%ID^E:1.4e-81^RecName: Full=Trehalase {ECO:0000305}	PF01204.17^Trehalase^Trehalase^17-456^E:8.5e-97`PF01204.17^Trehalase^Trehalase^560-607^E:2.8e-09	COG1626^trehalase	KEGG:ddi:DDB_G0283473`KO:K01194	GO:0004555^molecular_function^alpha,alpha-trehalase activity`GO:0005993^biological_process^trehalose catabolic process	GO:0004555^molecular_function^alpha,alpha-trehalase activity`GO:0005991^biological_process^trehalose metabolic process
CBM1; GH3	Cellulase	beta-glucosidase	LE01Gene10512	11.567	10.5059	11.2916	12.9902	12.6672	11.818	1.38412	0.000316915	0.00273234	LE01Gene10512	BGLL_ASPTN^BGLL_ASPTN^Q:79-2244,H:24-735^42.9%ID^E:1.7e-156^RecName: Full=Probable beta-glucosidase L	PF00933.20^Glyco_hydro_3^Glycosyl hydrolase family 3 N terminal domain^76-322^E:3.6e-40`PF01915.21^Glyco_hydro_3_C^Glycosyl hydrolase family 3 C-terminal domain^373-636^E:5.7e-44`PF14310.5^Fn3-like^Fibronectin type III-like domain^669-737^E:3.7e-21	.	KEGG:afm:AFUA_7G06140`KO:K05349	GO:0005576^cellular_component^extracellular region`GO:0008422^molecular_function^beta-glucosidase activity`GO:0102483^molecular_function^scopolin beta-glucosidase activity`GO:0030245^biological_process^cellulose catabolic process	GO:0004553^molecular_function^hydrolase activity, hydrolyzing O-glycosyl compounds`GO:0005975^biological_process^carbohydrate metabolic process
GH28	#N/A	#N/A	LE01Gene05940	9.02641	8.62269	8.99572	10.1143	9.03701	10.9398	1.33732	0.000663545	0.00495055	LE01Gene05940	PGXC_ASPFN^PGXC_ASPFN^Q:505-1749,H:46-434^36.5%ID^E:9.8e-67^RecName: Full=Probable exopolygalacturonase C	.	.	.	.	.
AA7	#N/A	#N/A	LE01Gene00046	10.3366	10.341	10.1089	10.954	11.4389	11.9568	1.24226	8.66e-07	1.83e-05	LE01Gene00046	A2372_ARTBC^A2372_ARTBC^Q:230-1363,H:16-371^30.7%ID^E:3.9e-34^RecName: Full=Uncharacterized FAD-linked oxidoreductase ARB_02372 {ECO:0000305}	PF01565.22^FAD_binding_4^FAD binding domain^77-211^E:1.8e-20	.	KEGG:ag:BAJ09785`KO:K20550	GO:0071949^molecular_function^FAD binding`GO:0016853^molecular_function^isomerase activity`GO:0016491^molecular_function^oxidoreductase activity`GO:0009405^biological_process^pathogenesis	GO:0016491^molecular_function^oxidoreductase activity`GO:0050660^molecular_function^flavin adenine dinucleotide binding`GO:0055114^biological_process^oxidation-reduction process
GH133; GH13_25	#N/A	#N/A	LE01Gene05224	11.4648	11.6181	11.4462	12.2986	12.964	12.8391	1.21666	2.28e-07	5.77e-06	LE01Gene05224	GDE_YEAST^GDE_YEAST^Q:250-4800,H:7-1523^42.9%ID^E:0^RecName: Full=Glycogen debranching enzyme	.	.	.	.	.
GH27	#N/A	#N/A	LE01Gene01844	12.3562	11.9756	13.5508	13.9611	14.0756	13.9522	1.20589	0.0010544	0.00722141	LE01Gene01844	AGALB_NEOFI^AGALB_NEOFI^Q:1117-2337,H:3-443^41.5%ID^E:8.5e-90^RecName: Full=Probable alpha-galactosidase B	.	.	.	GO:0005576^cellular_component^extracellular region`GO:0052692^molecular_function^raffinose alpha-galactosidase activity`GO:0005975^biological_process^carbohydrate metabolic process	.
GH28	#N/A	#N/A	LE01Gene13684	10.5801	9.35361	10.2219	11.6516	10.4243	11.4305	1.12234	0.00127293	0.00838859	LE01Gene13684	RGXB_ASPNC^RGXB_ASPNC^Q:38-1276,H:1-416^43.2%ID^E:2.1e-95^RecName: Full=Alpha-L-rhamnosidase rgxB	PF00295.16^Glyco_hydro_28^Glycosyl hydrolases family 28^133-418^E:2.2e-39	.	KEGG:ang:ANI_1_1122034	GO:0005576^cellular_component^extracellular region`GO:0030596^molecular_function^alpha-L-rhamnosidase activity`GO:0004650^molecular_function^polygalacturonase activity`GO:0071555^biological_process^cell wall organization`GO:0000272^biological_process^polysaccharide catabolic process	GO:0004650^molecular_function^polygalacturonase activity`GO:0005975^biological_process^carbohydrate metabolic process
GT8	#N/A	#N/A	LE01Gene00367	11.2969	11.6802	11.4647	13.0442	12.1853	12.403	1.10291	6.69e-05	0.000756862	LE01Gene00367	GYG1_CAEEL^GYG1_CAEEL^Q:109-771,H:4-219^44.9%ID^E:6e-44^RecName: Full=Glycogenin-1 {ECO:0000312|WormBase:F56B6.4a}	.	.	.	.	.
GT35	#N/A	#N/A	LE01Gene08549	13.8259	13.9342	13.7642	14.9384	15.035	14.8172	1.08981	4.8e-11	2.63e-09	LE01Gene08549	PHSG_YEAST^PHSG_YEAST^Q:69-2666,H:3-901^51.8%ID^E:8.3e-264^RecName: Full=Glycogen phosphorylase	.	.	.	.	.
CBM20; GH15	#N/A	#N/A	LE01Gene12151	8.32224	7.72185	8.7653	9.16835	9.78113	9.1148	1.05922	0.00024847	0.00223968	LE01Gene12151	AMYG_SCHCM^AMYG_SCHCM^Q:136-1821,H:22-575^56.6%ID^E:5e-189^RecName: Full=Glucoamylase ARB_02327-1 {ECO:0000305}	PF00723.20^Glyco_hydro_15^Glycosyl hydrolases family 15^62-477^E:4.2e-90`PF00686.18^CBM_20^Starch binding domain^513-601^E:9.3e-26	COG3387^glycoside hydrolase 15-related	KEGG:scm:SCHCODRAFT_57589`KO:K01178	GO:0005576^cellular_component^extracellular region`GO:0004339^molecular_function^glucan 1,4-alpha-glucosidase activity`GO:2001070^molecular_function^starch binding`GO:0000272^biological_process^polysaccharide catabolic process	GO:2001070^molecular_function^starch binding
CE16	#N/A	#N/A	LE01Gene03376	11.2292	10.2589	11.3052	12.0773	11.5392	12.4203	1.05419	0.000651591	0.00488005	LE01Gene03376	AES1_THIHE^AES1_THIHE^Q:232-936,H:63-293^30.8%ID^E:1.7e-26^RecName: Full=Acetylesterase {ECO:0000303|PubMed:24140638}	.	.	.	.	.
GH16	#N/A	#N/A	LE01Gene09786	14.9089	14.4323	14.9432	13.6903	13.5892	13.9353	-1.03388	7.15e-09	2.67e-07	LE01Gene09786	YHZ7_SCHPO^YHZ7_SCHPO^Q:202-1119,H:114-418^40.2%ID^E:2e-61^RecName: Full=Probable glycosidase C21B10.07	.	.	.	.	.
GH79	#N/A	#N/A	LE01Gene05168	12.6494	12.7457	12.6424	11.4252	11.7131	11.5915	-1.09884	2.94e-14	2.59e-12	LE01Gene05168	GUS79_ASPNC^GUS79_ASPNC^Q:973-2427,H:53-541^25.2%ID^E:9.9e-15^RecName: Full=Beta-glucuronidase {ECO:0000303|PubMed:18377882}	.	.	.	.	.
AA3	Lignin Degrading Auxiliary enzyme	aryl-alcohol oxidase	LE01Gene04836	12.6576	11.6729	12.6566	11.3268	11.1615	11.3521	-1.1149	0.00099832	0.00691844	LE01Gene04836	PDH1_AGABI^PDH1_AGABI^Q:934-2631,H:76-594^36%ID^E:1.5e-87^RecName: Full=Pyranose dehydrogenase {ECO:0000303|PubMed:11086703}	PF00732.18^GMC_oxred_N^GMC oxidoreductase^135-263^E:6.1e-24`PF05199.12^GMC_oxred_C^GMC oxidoreductase^363-504^E:2.3e-37	.	.	GO:0005576^cellular_component^extracellular region`GO:0050660^molecular_function^flavin adenine dinucleotide binding`GO:0033718^molecular_function^pyranose dehydrogenase (acceptor) activity`GO:0005975^biological_process^carbohydrate metabolic process	GO:0016614^molecular_function^oxidoreductase activity, acting on CH-OH group of donors`GO:0050660^molecular_function^flavin adenine dinucleotide binding`GO:0055114^biological_process^oxidation-reduction process
GT15	#N/A	#N/A	LE01Gene00748	12.9111	12.1419	12.6248	11.1981	11.5958	11.2627	-1.2305	7.42e-08	2.16e-06	LE01Gene00748	MNT1_CANAL^MNT1_CANAL^Q:631-1638,H:108-417^47.8%ID^E:1.9e-89^RecName: Full=Glycolipid 2-alpha-mannosyltransferase 1	PF01793.15^Glyco_transf_15^Glycolipid 2-alpha-mannosyltransferase^48-172^E:3.6e-29`PF01793.15^Glyco_transf_15^Glycolipid 2-alpha-mannosyltransferase^227-373^E:1.5e-68	.	KEGG:cal:CAALFM_C301810CA`KO:K10967	GO:0005576^cellular_component^extracellular region`GO:0000139^cellular_component^Golgi membrane`GO:0016021^cellular_component^integral component of membrane`GO:0016020^cellular_component^membrane`GO:0005886^cellular_component^plasma membrane`GO:0000026^molecular_function^alpha-1,2-mannosyltransferase activity`GO:0043710^biological_process^cell adhesion involved in multi-species biofilm formation`…	GO:0000030^molecular_function^mannosyltransferase activity`GO:0006486^biological_process^protein glycosylation`GO:0016020^cellular_component^membrane
AA1	Lignin Oxidase	multicopper oxidase	LE01Gene05032	12.0231	12.3399	12.1974	10.8974	10.5128	11.1625	-1.31119	3.33e-07	8.09e-06	LE01Gene05032	FER1_USTMA^FER1_USTMA^Q:134-1903,H:20-618^46.4%ID^E:6.6e-157^RecName: Full=Iron multicopper oxidase fer1 {ECO:0000303|PubMed:17138696}	PF07732.14^Cu-oxidase_3^Multicopper oxidase^32-147^E:3.6e-29`PF00394.21^Cu-oxidase^Multicopper oxidase^154-317^E:4.2e-34`PF07731.13^Cu-oxidase_2^Multicopper oxidase^410-517^E:6.5e-35	.	KEGG:uma:UMAG_00105`KO:K19791	GO:0033573^cellular_component^high-affinity iron permease complex`GO:0005507^molecular_function^copper ion binding`GO:0004322^molecular_function^ferroxidase activity`GO:0033215^biological_process^iron assimilation by reduction and transport`GO:0034755^biological_process^iron ion transmembrane transport`GO:0006826^biological_process^iron ion transport`GO:0009405^biological_process^pathogenesis	GO:0005507^molecular_function^copper ion binding`GO:0055114^biological_process^oxidation-reduction process`GO:0016491^molecular_function^oxidoreductase activity
GH16_1	#N/A	#N/A	LE01Gene08682	9.46324	8.11727	9.63487	8.07206	7.69547	7.79161	-1.35286	0.000726747	0.00533358	LE01Gene08682	EGLX_NEOFI^EGLX_NEOFI^Q:497-1456,H:14-338^40.4%ID^E:3.4e-54^RecName: Full=Probable endo-1,3(4)-beta-glucanase NFIA_089530	.	.	KEGG:nfi:NFIA_089530	GO:0031225^cellular_component^anchored component of membrane`GO:0005886^cellular_component^plasma membrane`GO:0052861^molecular_function^glucan endo-1,3-beta-glucanase activity, C-3 substituted reducing group`GO:0052862^molecular_function^glucan endo-1,4-beta-glucanase activity, C-3 substituted reducing group`GO:0030245^biological_process^cellulose catabolic process	.
GH92	#N/A	#N/A	LE01Gene09210	13.2473	12.02	13.0794	11.2026	11.3952	11.6754	-1.43739	8.71e-07	1.84e-05	LE01Gene09210	A7629_ARTBC^A7629_ARTBC^Q:548-2710,H:46-717^33%ID^E:1.9e-96^RecName: Full=Uncharacterized secreted glycosidase ARB_07629 {ECO:0000305}	.	.	.	.	.
GH27	#N/A	#N/A	LE01Gene05323	16.0645	14.3132	15.8088	14.2411	13.1409	14.5178	-1.49631	0.000637759	0.00480415	LE01Gene05323	AGAL3_HYPJE^AGAL3_HYPJE^Q:49-1383,H:167-618^49.2%ID^E:1.2e-117^RecName: Full=Alpha-galactosidase 3	PF16499.4^Melibiase_2^Alpha galactosidase A^36-124^E:1.3e-08`PF16499.4^Melibiase_2^Alpha galactosidase A^151-352^E:1.8e-08	ENOG410Y110^glycoside hydrolase family 27	.	GO:0005576^cellular_component^extracellular region`GO:0004557^molecular_function^alpha-galactosidase activity`GO:0052692^molecular_function^raffinose alpha-galactosidase activity`GO:0005975^biological_process^carbohydrate metabolic process	GO:0004553^molecular_function^hydrolase activity, hydrolyzing O-glycosyl compounds`GO:0005975^biological_process^carbohydrate metabolic process
GT1	#N/A	#N/A	LE01Gene13736	10.0484	11.8479	9.76551	9.16036	9.19346	9.58126	-1.54718	0.000209462	0.0019299	LE01Gene13736	UFOG1_FRAAN^UFOG1_FRAAN^Q:772-1242,H:235-392^37.6%ID^E:8.2e-17^RecName: Full=Anthocyanidin 3-O-glucosyltransferase 1	PF00201.17^UDPGT^UDP-glucoronosyl and UDP-glucosyl transferase^297-426^E:4.1e-19	COG1819^Transferase	KEGG:ath:AT1G22340	GO:0043231^cellular_component^intracellular membrane-bounded organelle`GO:0015020^molecular_function^glucuronosyltransferase activity`GO:0080043^molecular_function^quercetin 3-O-glucosyltransferase activity`GO:0080044^molecular_function^quercetin 7-O-glucosyltransferase activity`GO:0008152^biological_process^metabolic process	GO:0016758^molecular_function^transferase activity, transferring hexosyl groups
GH16	#N/A	#N/A	LE01Gene09459	9.07265	9.17563	8.59113	5.96496	8.02793	7.2099	-1.67855	9.46e-05	0.00101866	LE01Gene09459	GUB_PAEPO^GUB_PAEPO^Q:889-1413,H:60-209^22.8%ID^E:2.7e-05^RecName: Full=Beta-glucanase	.	.	.	.	.
AA3	#N/A	#N/A	LE01Gene07753	11.3588	13.4836	11.9996	10.874	11.0164	10.2504	-1.81551	7.57e-05	0.000841128	LE01Gene07753	XPTC_EMENI^XPTC_EMENI^Q:103-1944,H:25-613^29.3%ID^E:1.5e-47^RecName: Full=Dehydrogenase xptC {ECO:0000303|PubMed:21351751}	PF05199.12^GMC_oxred_C^GMC oxidoreductase^63-204^E:3.9e-25	.	KEGG:ani:AN7998.2	GO:0050660^molecular_function^flavin adenine dinucleotide binding`GO:0016614^molecular_function^oxidoreductase activity, acting on CH-OH group of donors`GO:1900793^biological_process^shamixanthone biosynthetic process	GO:0016614^molecular_function^oxidoreductase activity, acting on CH-OH group of donors`GO:0055114^biological_process^oxidation-reduction process
AA3	#N/A	#N/A	LE01Gene06189	9.67289	9.97559	9.59556	7.79067	8.30286	7.35704	-1.89418	1e-08	3.62e-07	LE01Gene06189	CITC_MONPU^CITC_MONPU^Q:218-1984,H:9-609^34.7%ID^E:2e-82^RecName: Full=Dehydrogenase mpl7 {ECO:0000303|PubMed:27913218}	PF00732.18^GMC_oxred_N^GMC oxidoreductase^40-351^E:2.4e-60`PF05199.12^GMC_oxred_C^GMC oxidoreductase^481-618^E:1.8e-33	.	.	GO:0050660^molecular_function^flavin adenine dinucleotide binding`GO:0016614^molecular_function^oxidoreductase activity, acting on CH-OH group of donors	GO:0016614^molecular_function^oxidoreductase activity, acting on CH-OH group of donors`GO:0050660^molecular_function^flavin adenine dinucleotide binding`GO:0055114^biological_process^oxidation-reduction process
PL4	#N/A	#N/A	LE01Gene10811	12.5933	11.7555	12.2091	10.6854	9.93314	10.0621	-1.96104	2.87e-11	1.65e-09	LE01Gene10811	RGLB_ASPFN^RGLB_ASPFN^Q:495-2417,H:14-662^43.1%ID^E:2.1e-144^RecName: Full=Probable rhamnogalacturonate lyase B	.	.	.	.	.
GH76	#N/A	#N/A	LE01Gene10232	10.025	8.12267	10.9058	7.74863	7.29267	7.73218	-2.47628	4.16e-06	7.02e-05	LE01Gene10232	.	.	.	.	.	.
CBM20; CBM25; GH13	#N/A	#N/A	LE01Gene09188	13.6645	11.6797	12.9008	10.1751	10.4027	10.6372	-2.54401	8.77e-12	5.39e-10	LE01Gene09188	AMY_STRLM^AMY_STRLM^Q:429-2096,H:29-565^45.6%ID^E:1.1e-129^RecName: Full=Alpha-amylase	.	.	.	.	.
CBM20; GH15	#N/A	#N/A	LE01Gene04186	14.7418	12.5254	14.4936	9.68722	9.7776	12.8222	-2.65608	0.000283916	0.00249381	LE01Gene04186	AMYG_SCHCM^AMYG_SCHCM^Q:909-2588,H:20-576^62.4%ID^E:4.7e-198^RecName: Full=Glucoamylase ARB_02327-1 {ECO:0000305}	.	.	.	.	.
GH76	#N/A	#N/A	LE01Gene02160	11.8013	9.69515	12.088	8.6982	7.79653	9.50243	-2.68513	3.02e-07	7.43e-06	LE01Gene02160	DCW1_YEAST^DCW1_YEAST^Q:47-1015,H:6-316^25.7%ID^E:5.5e-13^RecName: Full=Mannan endo-1,6-alpha-mannosidase DCW1	PF03663.13^Glyco_hydro_76^Glycosyl hydrolase family 76^50-214^E:4.6e-12`PF03663.13^Glyco_hydro_76^Glycosyl hydrolase family 76^234-390^E:9.2e-19	.	.	.	.
CBM20; GH15	#N/A	#N/A	LE01Gene04190	12.7744	11.4976	13.9848	9.09197	9.73821	9.61456	-3.58154	6.21e-15	6.2e-13	LE01Gene04190	AMYG_SCHCM^AMYG_SCHCM^Q:43-1725,H:18-576^62.7%ID^E:3.4e-199^RecName: Full=Glucoamylase ARB_02327-1 {ECO:0000305}	PF00723.20^Glyco_hydro_15^Glycosyl hydrolases family 15^34-447^E:1.5e-93`PF00686.18^CBM_20^Starch binding domain^481-569^E:1.6e-27	COG3387^glycoside hydrolase 15-related	KEGG:scm:SCHCODRAFT_57589`KO:K01178	GO:0005576^cellular_component^extracellular region`GO:0004339^molecular_function^glucan 1,4-alpha-glucosidase activity`GO:2001070^molecular_function^starch binding`GO:0000272^biological_process^polysaccharide catabolic process	GO:2001070^molecular_function^starch binding
GH18	#N/A	#N/A	LE01Gene09723	13.2496	11.0687	12.0356	8.02	8.10314	9.53371	-3.65919	6e-10	2.8e-08	LE01Gene09723	CHI33_ARTBC^CHI33_ARTBC^Q:1119-1817,H:114-323^24.3%ID^E:6.7e-05^RecName: Full=Class III chitinase ARB_03514 {ECO:0000305}	.	.	.	.	.
AA1	Lignin Oxidase	multicopper oxidase	LE01Gene01372	13.9102	12.7166	11.0015	9.21798	8.95818	9.4542	-3.75425	2.56e-07	6.4e-06	LE01Gene01372	LAC4_TRAVE^LAC4_TRAVE^Q:1120-2766,H:4-520^63.1%ID^E:2e-199^RecName: Full=Laccase-4	PF07732.14^Cu-oxidase_3^Multicopper oxidase^33-151^E:1e-33`PF00394.21^Cu-oxidase^Multicopper oxidase^164-260^E:1.1e-30`PF07731.13^Cu-oxidase_2^Multicopper oxidase^403-526^E:6.4e-37	.	.	GO:0005576^cellular_component^extracellular region`GO:0005507^molecular_function^copper ion binding`GO:0052716^molecular_function^hydroquinone:oxygen oxidoreductase activity`GO:0046274^biological_process^lignin catabolic process	GO:0005507^molecular_function^copper ion binding`GO:0055114^biological_process^oxidation-reduction process`GO:0016491^molecular_function^oxidoreductase activity
CBM1; GH7	Cellulase	1,4-beta-cellobiosidase	LE01Gene07961	12.1728	9.93017	12.7067	7.44075	7.73238	8.64174	-3.97073	4.35e-07	1.03e-05	LE01Gene07961	GUX1_PHACH^GUX1_PHACH^Q:25-1383,H:1-446^63.4%ID^E:6.7e-164^RecName: Full=Exoglucanase 1	.	.	.	.	.
AA9	Cellulase	Endo-beta-1,4-glucanase	LE01Gene10266	15.6152	13.4284	12.9008	5.21065	5.14489	11.2743	-4.75716	0.00107538	0.00731522	LE01Gene10266	EGLD_NEOFI^EGLD_NEOFI^Q:62-841,H:2-234^31.9%ID^E:2.8e-20^RecName: Full=Probable endo-beta-1,4-glucanase D	PF03443.13^Glyco_hydro_61^Glycosyl hydrolase family 61^23-219^E:1.5e-52	.	KEGG:nfi:NFIA_099510`KO:K19356	GO:0005576^cellular_component^extracellular region`GO:0008810^molecular_function^cellulase activity`GO:0030248^molecular_function^cellulose binding`GO:0030245^biological_process^cellulose catabolic process	.
AA1	Lignin Oxidase	multicopper oxidase	LE01Gene13044	13.3788	14.4844	8.31871	7.36858	8.88138	7.81726	-5.30144	1.58e-07	4.23e-06	LE01Gene13044	LAC5_TRAVI^LAC5_TRAVI^Q:34-1602,H:6-527^62.2%ID^E:9e-182^RecName: Full=Laccase-5	.	.	.	.	.

## Sheet: ow_2-VS-ow_1
CAZyme_family	Class	Gene name	Gene_id	ow_1_a	ow_1_b	ow_1_c	ow_2_a	ow_2_b	ow_2_c	log2FoldChange	pvalue	padj	id	sprot_Top_BLASTX_hit	Pfam	eggnog	Kegg	gene_ontology_blast	gene_ontology_pfam
GH12	Cellulase	Endo-beta-1,4-glucanase	LE01Gene13789	4.54393	5.19592	3.81904	11.7184	10.4546	9.55446	6.27857	1.45e-12	1.53e-11	LE01Gene13789	XGEA_ASPNC^XGEA_ASPNC^Q:92-817,H:4-240^44.7%ID^E:1.6e-47^RecName: Full=Probable xyloglucan-specific endo-beta-1,4-glucanase A	PF01670.15^Glyco_hydro_12^Glycosyl hydrolase family 12^64-273^E:3.2e-38	.	KEGG:ang:ANI_1_432014`KO:K18576	GO:0005576^cellular_component^extracellular region`GO:0008810^molecular_function^cellulase activity`GO:0033946^molecular_function^xyloglucan-specific endo-beta-1,4-glucanase activity`GO:0071555^biological_process^cell wall organization`GO:0000272^biological_process^polysaccharide catabolic process	GO:0008810^molecular_function^cellulase activity`GO:0000272^biological_process^polysaccharide catabolic process
GH128	#N/A	#N/A	LE01Gene01001	11.3371	11.5873	11.5508	15.25	16.1487	18.0965	5.49981	7.81e-07	3.28e-06	LE01Gene01001	ASL1_SCHPO^ASL1_SCHPO^Q:820-1554,H:295-527^31.4%ID^E:3.5e-18^RecName: Full=Alkali-sensitive linkage protein 1	PF11790.7^Glyco_hydro_cc^Glycosyl hydrolase catalytic core^25-238^E:2.7e-32	.	.	.	.
AA7	#N/A	#N/A	LE01Gene10788	7.1669	7.61925	7.32538	12.2373	13.2692	11.6678	5.17262	1.01e-38	3.19e-36	LE01Gene10788	CHG5_CHAGB^CHG5_CHAGB^Q:740-2227,H:63-560^32.3%ID^E:1.5e-65^RecName: Full=FAD-linked oxidoreductase CHGG_01242-2 {ECO:0000303|PubMed:23611317}	.	.	.	.	.
GH47	#N/A	#N/A	LE01Gene07086	5.91205	6.09708	6.65631	11.2656	11.7444	10.4476	5.00772	2.34e-17	5.05e-16	LE01Gene07086	MNS1B_ASPPH^MNS1B_ASPPH^Q:190-1533,H:45-504^39.4%ID^E:1e-84^RecName: Full=Mannosyl-oligosaccharide alpha-1,2-mannosidase 1B	PF01532.19^Glyco_hydro_47^Glycosyl hydrolase family 47^47-494^E:4.7e-119	.	.	GO:0060205^cellular_component^cytoplasmic vesicle lumen`GO:0016020^cellular_component^membrane`GO:0005509^molecular_function^calcium ion binding`GO:0004571^molecular_function^mannosyl-oligosaccharide 1,2-alpha-mannosidase activity`GO:0005975^biological_process^carbohydrate metabolic process`GO:0006486^biological_process^protein glycosylation	GO:0004571^molecular_function^mannosyl-oligosaccharide 1,2-alpha-mannosidase activity`GO:0005509^molecular_function^calcium ion binding`GO:0016020^cellular_component^membrane
AA3	Lignin Degrading Auxiliary enzyme	glucose oxidase	LE01Gene07621	9.76777	10.0591	9.7824	15.0507	15.3749	11.4871	4.81549	4.3e-08	2.2e-07	LE01Gene07621	GOX_ASPNG^GOX_ASPNG^Q:307-2097,H:26-603^30.3%ID^E:1.4e-43^RecName: Full=Glucose oxidase	PF00732.18^GMC_oxred_N^GMC oxidoreductase^38-357^E:6.7e-45`PF05199.12^GMC_oxred_C^GMC oxidoreductase^466-607^E:5.5e-24	.	KEGG:ani:AN7998.2	GO:0050660^molecular_function^flavin adenine dinucleotide binding`GO:0016614^molecular_function^oxidoreductase activity, acting on CH-OH group of donors`GO:1900793^biological_process^shamixanthone biosynthetic process	GO:0016614^molecular_function^oxidoreductase activity, acting on CH-OH group of donors`GO:0050660^molecular_function^flavin adenine dinucleotide binding`GO:0055114^biological_process^oxidation-reduction process
GH16	#N/A	#N/A	LE01Gene05083	7.0555	7.49375	7.41339	11.2711	10.4316	13.2257	4.80392	6.62e-22	2.7e-20	LE01Gene05083	YHZ7_SCHPO^YHZ7_SCHPO^Q:102-995,H:126-417^44.7%ID^E:5.8e-63^RecName: Full=Probable glycosidase C21B10.07	PF00722.20^Glyco_hydro_16^Glycosyl hydrolases family 16^75-172^E:4.5e-07	.	KEGG:ang:ANI_1_2196024	GO:0031225^cellular_component^anchored component of membrane`GO:0005886^cellular_component^plasma membrane`GO:0052861^molecular_function^glucan endo-1,3-beta-glucanase activity, C-3 substituted reducing group`GO:0052862^molecular_function^glucan endo-1,4-beta-glucanase activity, C-3 substituted reducing group`GO:0030245^biological_process^cellulose catabolic process	GO:0004553^molecular_function^hydrolase activity, hydrolyzing O-glycosyl compounds`GO:0005975^biological_process^carbohydrate metabolic process
AA2	Lignin Oxidase	Manganese peroxidase	LE01Gene08997	9.95579	9.97314	10.358	14.3815	15.7151	13.5499	4.71922	7.68e-10	5.24e-09	LE01Gene08997	PEM2_PHLRA^PEM2_PHLRA^Q:1487-2656,H:5-390^63.4%ID^E:1.1e-135^RecName: Full=Manganese peroxidase 2	PF00141.22^peroxidase^Peroxidase^174-407^E:8.9e-26`PF11895.7^Peroxidase_ext^Fungal peroxidase extension region^413-489^E:1.9e-29	.	KEGG:ag:CAC85963`KO:K20205	GO:0005576^cellular_component^extracellular region`GO:0020037^molecular_function^heme binding`GO:0016689^molecular_function^manganese peroxidase activity`GO:0046872^molecular_function^metal ion binding`GO:0042744^biological_process^hydrogen peroxide catabolic process`GO:0046274^biological_process^lignin catabolic process`GO:0006979^biological_process^response to oxidative stress	GO:0004601^molecular_function^peroxidase activity`GO:0020037^molecular_function^heme binding`GO:0006979^biological_process^response to oxidative stress`GO:0055114^biological_process^oxidation-reduction process
AA5	Lignin Degrading Auxiliary enzyme	Glyoxal oxidase	LE01Gene02092	9.38138	9.00466	9.04873	13.8627	14.4687	12.7863	4.70839	5.39e-17	1.12e-15	LE01Gene02092	GLOX_PHACH^GLOX_PHACH^Q:491-2146,H:3-556^59.3%ID^E:3.9e-190^RecName: Full=Aldehyde oxidase GLOX {ECO:0000305}	PF07250.10^Glyoxal_oxid_N^Glyoxal oxidase N-terminus^233-445^E:2.9e-30`PF09118.10^DUF1929^Domain of unknown function (DUF1929)^609-708^E:1.5e-22	.	KEGG:ag:AAA33747`KO:K20929	GO:0005615^cellular_component^extracellular space`GO:0004031^molecular_function^aldehyde oxidase activity`GO:0102797^molecular_function^geranial:oxygen oxidoreductase activity`GO:0102798^molecular_function^heptaldehyde:oxygen oxidoreductase activity`GO:0050665^biological_process^hydrogen peroxide biosynthetic process	.
AA3	Lignin Degrading Auxiliary enzyme	aryl-alcohol oxidase	LE01Gene04820	8.7088	8.88625	8.81991	12.475	13.0655	13.6476	4.33715	3.03e-48	2.08e-45	LE01Gene04820	DTXS3_METRA^DTXS3_METRA^Q:2343-3371,H:20-369^54.3%ID^E:5.9e-102^RecName: Full=Aldo-keto reductase dtxS3 {ECO:0000305}	PF00732.18^GMC_oxred_N^GMC oxidoreductase^43-356^E:1.3e-55`PF05199.12^GMC_oxred_C^GMC oxidoreductase^464-604^E:4.4e-29`PF00248.20^Aldo_ket_red^Aldo/keto reductase family^642-952^E:7.4e-68	.	KEGG:maj:MAA_10045	GO:0016491^molecular_function^oxidoreductase activity	GO:0016614^molecular_function^oxidoreductase activity, acting on CH-OH group of donors`GO:0050660^molecular_function^flavin adenine dinucleotide binding`GO:0055114^biological_process^oxidation-reduction process
CBM67	#N/A	#N/A	LE01Gene08448	9.90848	10.4603	9.34124	14.069	14.288	13.4273	3.9986	3.09e-20	1.03e-18	LE01Gene08448	.	.	.	.	.	.
CE4	#N/A	#N/A	LE01Gene06517	7.75825	8.12666	8.37449	11.7244	12.3828	11.9797	3.95144	3.52e-26	2.56e-24	LE01Gene06517	PGDAE_HELPG^PGDAE_HELPG^Q:264-1118,H:2-285^60.7%ID^E:1.9e-104^RecName: Full=Peptidoglycan deacetylase	PF01522.20^Polysacc_deac_1^Polysaccharide deacetylase^43-147^E:1.3e-14	.	KEGG:hpg:HPG27_289`KO:K22278	GO:0046555^molecular_function^acetylxylan esterase activity`GO:0016810^molecular_function^hydrolase activity, acting on carbon-nitrogen (but not peptide) bonds`GO:0046872^molecular_function^metal ion binding`GO:0071555^biological_process^cell wall organization`GO:0045493^biological_process^xylan catabolic process	GO:0016810^molecular_function^hydrolase activity, acting on carbon-nitrogen (but not peptide) bonds`GO:0005975^biological_process^carbohydrate metabolic process
AA3_4	Lignin Degrading Auxiliary enzyme	Pyranose oxidase	LE01Gene02678	11.0832	9.77476	11.3203	15.5079	14.2399	14.2549	3.93236	1.39e-13	1.73e-12	LE01Gene02678	P2OX_TRIMT^P2OX_TRIMT^Q:551-2125,H:33-548^57.9%ID^E:1.1e-173^RecName: Full=Pyranose 2-oxidase	PF00732.18^GMC_oxred_N^GMC oxidoreductase^297-373^E:3.7e-06`PF05199.12^GMC_oxred_C^GMC oxidoreductase^501-608^E:1.7e-10	.	.	GO:0050660^molecular_function^flavin adenine dinucleotide binding`GO:0050233^molecular_function^pyranose oxidase activity	GO:0016614^molecular_function^oxidoreductase activity, acting on CH-OH group of donors`GO:0050660^molecular_function^flavin adenine dinucleotide binding`GO:0055114^biological_process^oxidation-reduction process
GH13; GH152	#N/A	#N/A	LE01Gene12203	3.28342	5.23336	5.18216	9.32427	8.52074	7.24608	3.84315	1.17e-07	5.6e-07	LE01Gene12203	AMYB_ASPAW^AMYB_ASPAW^Q:1205-2719,H:3-498^44.5%ID^E:1.3e-116^RecName: Full=Alpha-amylase B	.	.	.	.	.
CBM67	#N/A	#N/A	LE01Gene11861	12.0986	12.4429	11.5556	15.9372	16.5128	14.6242	3.80776	7.62e-18	1.79e-16	LE01Gene11861	.	.	.	.	.	.
GH18	#N/A	#N/A	LE01Gene09736	9.69867	8.3938	9.31177	13.6693	12.5075	11.6697	3.61849	6.38e-16	1.15e-14	LE01Gene09736	.	PF00704.27^Glyco_hydro_18^Glycosyl hydrolases family 18^174-412^E:2.1e-13	.	.	.	GO:0005975^biological_process^carbohydrate metabolic process
GH20	#N/A	#N/A	LE01Gene10240	8.6119	8.66779	9.05968	12.5588	12.4957	11.7266	3.51576	7.86e-16	1.4e-14	LE01Gene10240	HEXO2_ARATH^HEXO2_ARATH^Q:285-1994,H:8-571^34.7%ID^E:1.7e-83^RecName: Full=Beta-hexosaminidase 2	.	.	.	.	.
AA3	#N/A	#N/A	LE01Gene13764	7.96295	8.48587	8.35684	11.7418	11.9093	11.5868	3.47106	5.52e-21	1.99e-19	LE01Gene13764	BETA_PSE14^BETA_PSE14^Q:1352-3019,H:7-535^32.5%ID^E:5e-67^RecName: Full=Oxygen-dependent choline dehydrogenase {ECO:0000255|HAMAP-Rule:MF_00750}	.	.	.	.	.
AA6	Lignin Degrading Auxiliary enzyme	Benzoquinone reductase	LE01Gene05328	8.15206	8.23214	8.07323	10.8613	12.4765	10.8444	3.46384	1.18e-10	9.12e-10	LE01Gene05328	PST2_YEAST^PST2_YEAST^Q:126-716,H:2-197^62.9%ID^E:1.4e-70^RecName: Full=Protoplast secreted protein 2	PF03358.14^FMN_red^NADPH-dependent FMN reductase^56-183^E:1.4e-09`PF02525.16^Flavodoxin_2^Flavodoxin-like fold^56-173^E:8.7e-07	.	KEGG:sce:YDR032C	GO:0005576^cellular_component^extracellular region`GO:0010181^molecular_function^FMN binding`GO:0042802^molecular_function^identical protein binding`GO:0003955^molecular_function^NAD(P)H dehydrogenase (quinone) activity	GO:0016491^molecular_function^oxidoreductase activity
GH18	#N/A	#N/A	LE01Gene10302	8.0126	7.46256	8.63826	12.6272	10.0865	10.1328	3.36201	1.56e-08	8.61e-08	LE01Gene10302	CHI2_RHIOL^CHI2_RHIOL^Q:842-1675,H:58-304^46.8%ID^E:4.1e-62^RecName: Full=Chitinase 2	.	.	.	.	.
GH152	#N/A	#N/A	LE01Gene02946	7.6227	7.84161	8.30256	10.1427	11.1138	11.751	3.19951	1.2e-13	1.51e-12	LE01Gene02946	PR5_ARATH^PR5_ARATH^Q:644-1357,H:23-239^40.1%ID^E:2.9e-32^RecName: Full=Pathogenesis-related protein 5	.	.	.	.	.
GH92	#N/A	#N/A	LE01Gene04001	7.8762	8.46635	8.84228	11.6465	12.2702	10.4624	3.19312	2.97e-08	1.55e-07	LE01Gene04001	A7629_ARTBC^A7629_ARTBC^Q:873-3197,H:29-761^31.8%ID^E:5.7e-102^RecName: Full=Uncharacterized secreted glycosidase ARB_07629 {ECO:0000305}	PF07971.11^Glyco_hydro_92^Glycosyl hydrolase family 92^283-796^E:4.2e-127	COG3537^Alpha-1,2-mannosidase	KEGG:abe:ARB_07629	GO:0005576^cellular_component^extracellular region`GO:0030246^molecular_function^carbohydrate binding`GO:0016798^molecular_function^hydrolase activity, acting on glycosyl bonds`GO:0008152^biological_process^metabolic process	.
GH28	#N/A	#N/A	LE01Gene12986	8.25191	9.3666	8.63093	11.4125	12.5171	11.7751	3.15364	1.07e-14	1.61e-13	LE01Gene12986	RGXB_ASPNC^RGXB_ASPNC^Q:396-1595,H:33-417^51%ID^E:7.6e-110^RecName: Full=Alpha-L-rhamnosidase rgxB	PF00295.16^Glyco_hydro_28^Glycosyl hydrolases family 28^95-406^E:1.5e-38	.	KEGG:ang:ANI_1_1122034	GO:0005576^cellular_component^extracellular region`GO:0030596^molecular_function^alpha-L-rhamnosidase activity`GO:0004650^molecular_function^polygalacturonase activity`GO:0071555^biological_process^cell wall organization`GO:0000272^biological_process^polysaccharide catabolic process	GO:0004650^molecular_function^polygalacturonase activity`GO:0005975^biological_process^carbohydrate metabolic process
GH16	#N/A	#N/A	LE01Gene05084	4.76606	5.75489	4.25985	9.26626	7.32609	6.23592	3.12313	5.28e-06	1.92e-05	LE01Gene05084	YHZ7_SCHPO^YHZ7_SCHPO^Q:319-1197,H:128-417^39.7%ID^E:1e-60^RecName: Full=Probable glycosidase C21B10.07	.	.	.	.	.
AA7	#N/A	#N/A	LE01Gene05597	7.51963	8.05005	6.75393	9.62538	10.3269	11.4103	3.1141	3.99e-07	1.75e-06	LE01Gene05597	CHG5_CHAGB^CHG5_CHAGB^Q:602-2266,H:49-608^34.9%ID^E:4e-84^RecName: Full=FAD-linked oxidoreductase CHGG_01242-2 {ECO:0000303|PubMed:23611317}	PF01565.22^FAD_binding_4^FAD binding domain^121-263^E:1.7e-19`PF08031.11^BBE^Berberine and berberine like^509-542^E:5.6e-07	ENOG4110F4M^FAD binding domain-containing protein	KEGG:abe:ARB_07056	GO:0005576^cellular_component^extracellular region`GO:0071949^molecular_function^FAD binding`GO:0016491^molecular_function^oxidoreductase activity	GO:0016491^molecular_function^oxidoreductase activity`GO:0050660^molecular_function^flavin adenine dinucleotide binding`GO:0055114^biological_process^oxidation-reduction process
GH28	#N/A	#N/A	LE01Gene06973	7.57209	8.36879	8.48828	11.6566	11.1412	10.3332	2.94945	0.00228022	0.00499772	LE01Gene06973	PGLRA_ASPKW^PGLRA_ASPKW^Q:60-1187,H:10-367^36.3%ID^E:3.1e-46^RecName: Full=Probable endopolygalacturonase A	PF00295.16^Glyco_hydro_28^Glycosyl hydrolases family 28^73-383^E:2.9e-60	.	.	GO:0005576^cellular_component^extracellular region`GO:0004650^molecular_function^polygalacturonase activity`GO:0005975^biological_process^carbohydrate metabolic process`GO:0071555^biological_process^cell wall organization	GO:0004650^molecular_function^polygalacturonase activity`GO:0005975^biological_process^carbohydrate metabolic process
CBM12	#N/A	#N/A	LE01Gene01726	12.38	12.8055	13.2918	16.2803	15.5771	15.4145	2.93471	4.39e-12	4.25e-11	LE01Gene01726	DEAA_VIBAL^DEAA_VIBAL^Q:324-536,H:305-375^36.6%ID^E:9.6e-06^RecName: Full=Chitin disaccharide deacetylase	.	.	.	.	.
GT8	#N/A	#N/A	LE01Gene07316	8.20996	8.02891	8.67076	11.4214	11.5806	10.5515	2.92493	1.24e-15	2.16e-14	LE01Gene07316	Y258_HAEIN^Y258_HAEIN^Q:917-1591,H:46-274^25.2%ID^E:1.4e-12^RecName: Full=Putative glycosyltransferase HI_0258	PF13578.5^Methyltransf_24^Methyltransferase domain^67-224^E:5.1e-14`PF01501.19^Glyco_transf_8^Glycosyl transferase family 8^300-532^E:3.1e-27	.	.	.	GO:0016757^molecular_function^transferase activity, transferring glycosyl groups
GH16	#N/A	#N/A	LE01Gene07068	9.51945	9.85801	10.2208	11.866	11.8441	13.7193	2.87282	1.39e-09	9.05e-09	LE01Gene07068	YHZ7_SCHPO^YHZ7_SCHPO^Q:346-1248,H:126-417^36.4%ID^E:1.7e-48^RecName: Full=Probable glycosidase C21B10.07	.	.	KEGG:ang:ANI_1_2196024	GO:0031225^cellular_component^anchored component of membrane`GO:0005886^cellular_component^plasma membrane`GO:0052861^molecular_function^glucan endo-1,3-beta-glucanase activity, C-3 substituted reducing group`GO:0052862^molecular_function^glucan endo-1,4-beta-glucanase activity, C-3 substituted reducing group`GO:0030245^biological_process^cellulose catabolic process	.
AA3	Lignin Degrading Auxiliary enzyme	alcohol oxidase	LE01Gene10868	14.0497	14.6554	14.9285	16.726	18.0692	17.254	2.8677	6.19e-08	3.08e-07	LE01Gene10868	ALOX1_KOMPC^ALOX1_KOMPC^Q:38-1963,H:1-637^49.4%ID^E:1.1e-176^RecName: Full=Alcohol oxidase 1	.	.	.	.	.
GH18	#N/A	#N/A	LE01Gene04647	8.88798	9.50122	9.11847	12.1506	12.4434	11.3408	2.85916	0.000168541	0.000461671	LE01Gene04647	.	PF00704.27^Glyco_hydro_18^Glycosyl hydrolases family 18^64-301^E:9.8e-15	.	.	.	GO:0005975^biological_process^carbohydrate metabolic process
AA3	Lignin Degrading Auxiliary enzyme	aryl-alcohol oxidase	LE01Gene04836	6.18655	6.60531	6.75393	8.91558	9.76779	9.1785	2.81158	1.03e-15	1.81e-14	LE01Gene04836	PDH1_AGABI^PDH1_AGABI^Q:934-2631,H:76-594^36%ID^E:1.5e-87^RecName: Full=Pyranose dehydrogenase {ECO:0000303|PubMed:11086703}	PF00732.18^GMC_oxred_N^GMC oxidoreductase^135-263^E:6.1e-24`PF05199.12^GMC_oxred_C^GMC oxidoreductase^363-504^E:2.3e-37	.	.	GO:0005576^cellular_component^extracellular region`GO:0050660^molecular_function^flavin adenine dinucleotide binding`GO:0033718^molecular_function^pyranose dehydrogenase (acceptor) activity`GO:0005975^biological_process^carbohydrate metabolic process	GO:0016614^molecular_function^oxidoreductase activity, acting on CH-OH group of donors`GO:0050660^molecular_function^flavin adenine dinucleotide binding`GO:0055114^biological_process^oxidation-reduction process
GH30_3	#N/A	#N/A	LE01Gene06426	10.0513	10.5994	10.4038	13.4923	12.9493	12.5866	2.68997	8.81e-24	4.66e-22	LE01Gene06426	NEG1_NEUCR^NEG1_NEUCR^Q:483-1625,H:46-416^33.5%ID^E:3.5e-39^RecName: Full=Endo-1,6-beta-D-glucanase	PF02055.15^Glyco_hydro_30^Glycosyl hydrolase family 30 TIM-barrel domain^68-365^E:1.5e-27`PF02057.14^Glyco_hydro_59^Glycosyl hydrolase family 59^96-331^E:2e-06	.	.	GO:0005576^cellular_component^extracellular region`GO:0005615^cellular_component^extracellular space`GO:0046557^molecular_function^glucan endo-1,6-beta-glucosidase activity`GO:0004348^molecular_function^glucosylceramidase activity`GO:0016798^molecular_function^hydrolase activity, acting on glycosyl bonds`GO:0005976^biological_process^polysaccharide metabolic process`GO:0006665^biological_process^…	GO:0004336^molecular_function^galactosylceramidase activity`GO:0006683^biological_process^galactosylceramide catabolic process
GH5	#N/A	#N/A	LE01Gene04612	9.74511	8.32177	9.16231	13.0178	10.6223	9.73667	2.61649	2.49e-05	8.04e-05	LE01Gene04612	EXGB_EMENI^EXGB_EMENI^Q:424-1770,H:37-409^30.5%ID^E:7.1e-44^RecName: Full=Glucan endo-1,6-beta-glucosidase B	PF00150.17^Cellulase^Cellulase (glycosyl hydrolase family 5)^101-440^E:9.8e-11	.	KEGG:ani:AN3777.2`KO:K22277	GO:0009986^cellular_component^cell surface`GO:0005576^cellular_component^extracellular region`GO:0046557^molecular_function^glucan endo-1,6-beta-glucosidase activity`GO:0071555^biological_process^cell wall organization`GO:0006073^biological_process^cellular glucan metabolic process`GO:0009251^biological_process^glucan catabolic process	GO:0004553^molecular_function^hydrolase activity, hydrolyzing O-glycosyl compounds`GO:0005975^biological_process^carbohydrate metabolic process
GH78	#N/A	#N/A	LE01Gene11720	6.99091	7.76059	8.11057	9.77925	10.5348	10.3731	2.57774	4.66e-14	6.38e-13	LE01Gene11720	.	PF17389.1^Bac_rhamnosid6H^Bacterial alpha-L-rhamnosidase 6 hairpin glycosidase domain^248-468^E:4.5e-17`PF01204.17^Trehalase^Trehalase^382-460^E:3.5e-07	.	.	.	GO:0004555^molecular_function^alpha,alpha-trehalase activity`GO:0005991^biological_process^trehalose metabolic process
GH71	#N/A	#N/A	LE01Gene04265	6.60145	8.14642	6.84536	10.0941	10.0182	9.45817	2.52274	1.53e-08	8.44e-08	LE01Gene04265	AGN1_SCHPO^AGN1_SCHPO^Q:354-1562,H:24-422^35.6%ID^E:7e-59^RecName: Full=Glucan endo-1,3-alpha-glucosidase agn1	.	.	.	.	.
CBM1; GH10	Hemicellulase	Endo-1,4-beta-xylanase	LE01Gene02639	7.53481	7.79229	8.15209	10.7019	9.83803	10.1669	2.43676	6.89e-10	4.75e-09	LE01Gene02639	XYNA_PHACH^XYNA_PHACH^Q:177-1091,H:95-400^63.8%ID^E:5.4e-116^RecName: Full=Endo-1,4-beta-xylanase A	PF00331.19^Glyco_hydro_10^Glycosyl hydrolase family 10^45-347^E:1.6e-96	COG3693^hydrolase family 10	.	GO:0005576^cellular_component^extracellular region`GO:0030248^molecular_function^cellulose binding`GO:0031176^molecular_function^endo-1,4-beta-xylanase activity`GO:0045493^biological_process^xylan catabolic process	GO:0004553^molecular_function^hydrolase activity, hydrolyzing O-glycosyl compounds`GO:0005975^biological_process^carbohydrate metabolic process
GH27	#N/A	#N/A	LE01Gene01844	11.5529	11.6779	11.7494	13.354	13.9466	14.6108	2.39911	7.29e-11	5.83e-10	LE01Gene01844	AGALB_NEOFI^AGALB_NEOFI^Q:1117-2337,H:3-443^41.5%ID^E:8.5e-90^RecName: Full=Probable alpha-galactosidase B	.	.	.	GO:0005576^cellular_component^extracellular region`GO:0052692^molecular_function^raffinose alpha-galactosidase activity`GO:0005975^biological_process^carbohydrate metabolic process	.
AA2	Lignin Oxidase	Manganese peroxidase	LE01Gene09060	7.45724	7.72817	7.84542	9.50792	10.6872	9.74537	2.39446	1.93e-05	6.34e-05	LE01Gene09060	PEM2_PHLRA^PEM2_PHLRA^Q:1-1191,H:1-374^62.3%ID^E:8.5e-133^RecName: Full=Manganese peroxidase 2	PF00141.22^peroxidase^Peroxidase^55-307^E:3.5e-27`PF11895.7^Peroxidase_ext^Fungal peroxidase extension region^313-389^E:1.9e-30	.	KEGG:ag:CAC85963`KO:K20205	GO:0005576^cellular_component^extracellular region`GO:0020037^molecular_function^heme binding`GO:0016689^molecular_function^manganese peroxidase activity`GO:0046872^molecular_function^metal ion binding`GO:0042744^biological_process^hydrogen peroxide catabolic process`GO:0046274^biological_process^lignin catabolic process`GO:0006979^biological_process^response to oxidative stress	GO:0004601^molecular_function^peroxidase activity`GO:0020037^molecular_function^heme binding`GO:0006979^biological_process^response to oxidative stress`GO:0055114^biological_process^oxidation-reduction process
GH79	#N/A	#N/A	LE01Gene00946	7.44925	8.27316	8.32088	10.7481	10.0749	10.2946	2.33887	1.91e-06	7.53e-06	LE01Gene00946	GUS79_ASPNC^GUS79_ASPNC^Q:175-1743,H:31-541^26%ID^E:7e-26^RecName: Full=Beta-glucuronidase {ECO:0000303|PubMed:18377882}	.	.	.	.	.
GH79	#N/A	#N/A	LE01Gene09636	8.61547	8.68478	8.48422	11.0704	10.9731	10.7076	2.3308	1.19e-13	1.51e-12	LE01Gene09636	GUS79_ASPNC^GUS79_ASPNC^Q:1289-1939,H:317-540^30.6%ID^E:8e-17^RecName: Full=Beta-glucuronidase {ECO:0000303|PubMed:18377882}	.	.	.	.	.
AA1	Lignin Oxidase	multicopper oxidase	LE01Gene08330	7.04494	7.0865	6.47187	9.42982	9.45465	8.31336	2.2702	9.19e-12	8.44e-11	LE01Gene08330	LAC1_PHLRA^LAC1_PHLRA^Q:13-1587,H:8-515^65.9%ID^E:3.2e-199^RecName: Full=Laccase	.	.	.	.	.
CE1	#N/A	#N/A	LE01Gene00476	10.1605	10.134	10.4357	12.5523	12.6208	12.3607	2.26645	1.31e-23	6.75e-22	LE01Gene00476	ESTD_PIG^ESTD_PIG^Q:47-907,H:3-282^49.1%ID^E:1.3e-69^RecName: Full=S-formylglutathione hydrolase	PF00756.19^Esterase^Putative esterase^33-284^E:2.4e-41	COG0627^esterase	KEGG:ssc:397127`KO:K01070	GO:0031410^cellular_component^cytoplasmic vesicle`GO:0052689^molecular_function^carboxylic ester hydrolase activity`GO:0042802^molecular_function^identical protein binding`GO:0018738^molecular_function^S-formylglutathione hydrolase activity`GO:0046294^biological_process^formaldehyde catabolic process	.
GH76	#N/A	#N/A	LE01Gene07201	4.04717	5.67551	5.74026	7.17159	7.65835	7.65382	2.2055	0.000261749	0.000694058	LE01Gene07201	YHG7_SCHPO^YHG7_SCHPO^Q:484-1116,H:134-353^29%ID^E:4.3e-15^RecName: Full=Putative mannan endo-1,6-alpha-mannosidase C1198.07c	.	.	.	.	.
CBM51; GH35	#N/A	#N/A	LE01Gene05202	6.69903	7.24153	6.47187	9.67577	9.05937	7.74694	2.19677	3.54e-06	1.33e-05	LE01Gene05202	BGALA_NEOFI^BGALA_NEOFI^Q:1-3021,H:1-979^34.4%ID^E:2.6e-152^RecName: Full=Probable beta-galactosidase A	PF01301.18^Glyco_hydro_35^Glycosyl hydrolases family 35^43-368^E:3.8e-78`PF10435.8^BetaGal_dom2^Beta-galactosidase, domain 2^407-533^E:1.1e-30`PF13363.5^BetaGal_dom3^Beta-galactosidase, domain 3^574-660^E:4.9e-18`PF13364.5^BetaGal_dom4_5^Beta-galactosidase jelly roll domain^697-786^E:5.7e-13`PF13364.5^BetaGal_dom4_5^Beta-galactosidase jelly roll domain^885-995^E:4e-31	.	KEGG:nfi:NFIA_011250	GO:0005576^cellular_component^extracellular region`GO:0004565^molecular_function^beta-galactosidase activity`GO:0000272^biological_process^polysaccharide catabolic process	.
GH93	#N/A	#N/A	LE01Gene03844	5.93512	6.675	7.22195	9.37395	8.39798	8.6428	2.17455	0.000187578	0.000510589	LE01Gene03844	.	.	.	.	.	.
GH53	#N/A	#N/A	LE01Gene05090	5.95783	7.36473	8.28866	10.1319	8.83655	9.61272	2.13645	0.00017121	0.000468872	LE01Gene05090	GANA_EMENI^GANA_EMENI^Q:635-1579,H:7-322^47.2%ID^E:2.5e-75^RecName: Full=Arabinogalactan endo-beta-1,4-galactanase A	.	.	.	.	.
GH55	#N/A	#N/A	LE01Gene05622	7.73214	8.58694	9.10795	11.239	10.6241	9.81816	2.09501	8.82e-06	3.08e-05	LE01Gene05622	EXG1_COCCA^EXG1_COCCA^Q:56-2344,H:15-781^41.6%ID^E:1.4e-159^RecName: Full=Glucan 1,3-beta-glucosidase	PF12708.6^Pectate_lyase_3^Pectate lyase superfamily protein^75-302^E:1.5e-85`PF12708.6^Pectate_lyase_3^Pectate lyase superfamily protein^431-543^E:1.4e-14	ENOG410XTFG^glycoside hydrolase family 55 protein	KEGG:abe:ARB_02077	GO:0005576^cellular_component^extracellular region`GO:0042973^molecular_function^glucan endo-1,3-beta-D-glucosidase activity`GO:0008152^biological_process^metabolic process	.
CBM12; CBM5; GH18	#N/A	#N/A	LE01Gene08044	8.62615	7.79229	8.5243	11.3631	9.90936	9.08556	2.07464	0.000234286	0.000626926	LE01Gene08044	CHI1_RHIOL^CHI1_RHIOL^Q:198-1136,H:19-316^47.3%ID^E:8.2e-69^RecName: Full=Chitinase 1	.	.	.	.	.
GH18	#N/A	#N/A	LE01Gene05686	11.007	10.0964	10.4177	13.3696	12.2685	11.6387	2.0497	4.33e-05	0.000133296	LE01Gene05686	CHIA1_BACCI^CHIA1_BACCI^Q:672-1961,H:133-464^23%ID^E:1.2e-20^RecName: Full=Chitinase A1	PF00787.23^PX^PX domain^30-131^E:1.7e-14`PF00704.27^Glyco_hydro_18^Glycosyl hydrolases family 18^186-606^E:8.1e-56	COG3325^chitinase	KEGG:hsa:1118`KO:K01183	GO:0005576^cellular_component^extracellular region`GO:0005615^cellular_component^extracellular space`GO:0005764^cellular_component^lysosome`GO:0035580^cellular_component^specific granule lumen`GO:1904724^cellular_component^tertiary granule lumen`GO:0008061^molecular_function^chitin binding`GO:0004568^molecular_function^chitinase activity`GO:0008843^molecular_function^endochitinase activity`GO:000…	GO:0035091^molecular_function^phosphatidylinositol binding`GO:0005975^biological_process^carbohydrate metabolic process
PL14; PL36_2	#N/A	#N/A	LE01Gene02213	6.60145	6.42291	6.26034	7.48964	9.00613	8.53041	2.04701	2.05e-09	1.29e-08	LE01Gene02213	.	.	.	.	.	.
GH16_2	#N/A	#N/A	LE01Gene00492	10.3037	10.5031	10.4934	12.1765	12.7313	12.3907	2.01566	5.4e-22	2.26e-20	LE01Gene00492	SKN1_CANAX^SKN1_CANAX^Q:922-2463,H:246-736^41%ID^E:3.2e-103^RecName: Full=Beta-glucan synthesis-associated protein SKN1	.	.	.	.	.
PL14; PL36_2	#N/A	#N/A	LE01Gene03031	7.28834	7.32193	7.43036	9.49301	9.37289	9.16818	2.00984	2.44e-21	9.36e-20	LE01Gene03031	.	.	.	.	.	.
GH16_2	#N/A	#N/A	LE01Gene04938	9.04204	9.32385	9.24378	11.029	11.0632	11.3882	1.96311	2.99e-26	2.24e-24	LE01Gene04938	KRE6_YEAST^KRE6_YEAST^Q:285-1847,H:211-711^40.4%ID^E:5.3e-100^RecName: Full=Beta-glucan synthesis-associated protein KRE6	.	.	.	.	.
AA7	#N/A	#N/A	LE01Gene06745	7.34973	5.94741	8.31175	9.049	9.71899	9.39759	1.92196	5.89e-05	0.000176748	LE01Gene06745	PATO_ASPCL^PATO_ASPCL^Q:1087-2694,H:29-565^42%ID^E:5.9e-124^RecName: Full=FAD-linked oxidoreductase patO {ECO:0000303|PubMed:19383676}	PF01565.22^FAD_binding_4^FAD binding domain^127-267^E:4e-20`PF08031.11^BBE^Berberine and berberine like^512-548^E:5.6e-09	.	KEGG:act:ACLA_093700	GO:0071949^molecular_function^FAD binding`GO:0016491^molecular_function^oxidoreductase activity	GO:0016491^molecular_function^oxidoreductase activity`GO:0050660^molecular_function^flavin adenine dinucleotide binding`GO:0055114^biological_process^oxidation-reduction process
GH105	#N/A	#N/A	LE01Gene01413	6.52747	7.24153	6.48817	8.91279	8.79635	8.3412	1.91727	2.16e-05	7.05e-05	LE01Gene01413	URHG2_BACSU^URHG2_BACSU^Q:456-1487,H:41-367^31.1%ID^E:1.7e-43^RecName: Full=Unsaturated rhamnogalacturonyl hydrolase YteR	PF07470.12^Glyco_hydro_88^Glycosyl Hydrolase Family 88^49-392^E:2.1e-59	COG4225^Glycosyl Hydrolase Family 88	KEGG:atu:Atu3128	GO:0016787^molecular_function^hydrolase activity	.
GH2	#N/A	#N/A	LE01Gene01448	8.17647	8.23676	7.39621	10.1076	9.76779	9.78476	1.91532	1.04e-14	1.56e-13	LE01Gene01448	MANBB_THIHE^MANBB_THIHE^Q:803-2902,H:171-853^39.9%ID^E:2.1e-143^RecName: Full=Beta-mannosidase B	.	.	.	.	.
GH43	#N/A	#N/A	LE01Gene11715	9.01523	8.95229	8.98122	10.6757	11.2275	10.7174	1.9151	9.61e-23	4.36e-21	LE01Gene11715	ABNC_ASPNC^ABNC_ASPNC^Q:512-784,H:30-121^37.9%ID^E:0.00064^RecName: Full=Probable arabinan endo-1,5-alpha-L-arabinosidase C	PF04616.13^Glyco_hydro_43^Glycosyl hydrolases family 43^14-109^E:2.2e-07	.	.	.	GO:0004553^molecular_function^hydrolase activity, hydrolyzing O-glycosyl compounds`GO:0005975^biological_process^carbohydrate metabolic process
GH18	#N/A	#N/A	LE01Gene11646	9.97261	10.7369	10.944	12.4549	12.4421	12.6577	1.91462	6.43e-09	3.77e-08	LE01Gene11646	LACP_KLULA^LACP_KLULA^Q:210-1679,H:65-551^31.9%ID^E:9.4e-67^RecName: Full=Lactose permease	.	.	.	.	.
GH1	Cellulase	beta-glucosidase	LE01Gene06300	9.37296	9.7604	9.47609	11.745	11.6702	10.7575	1.91055	7.72e-08	3.79e-07	LE01Gene06300	BGL06_ORYSJ^BGL06_ORYSJ^Q:496-1890,H:50-511^34%ID^E:2.1e-71^RecName: Full=Beta-glucosidase 6 {ECO:0000305}	PF00232.17^Glyco_hydro_1^Glycosyl hydrolase family 1^165-640^E:3.6e-103	COG2723^beta-glucosidase	KEGG:osa:4332041`KO:K01188	GO:0005576^cellular_component^extracellular region`GO:0033907^molecular_function^beta-D-fucosidase activity`GO:0004565^molecular_function^beta-galactosidase activity`GO:0080083^molecular_function^beta-gentiobiose beta-glucosidase activity`GO:0008422^molecular_function^beta-glucosidase activity`GO:0080079^molecular_function^cellobiose glucosidase activity`GO:0042973^molecular_function^glucan endo-…	GO:0004553^molecular_function^hydrolase activity, hydrolyzing O-glycosyl compounds`GO:0005975^biological_process^carbohydrate metabolic process
GT1	#N/A	#N/A	LE01Gene13733	7.72554	8.0605	7.52031	9.57848	10.2281	8.92927	1.89306	3.48e-08	1.81e-07	LE01Gene13733	U72B3_ARATH^U72B3_ARATH^Q:1000-1743,H:205-439^27.6%ID^E:3.3e-14^RecName: Full=UDP-glycosyltransferase 72B3	PF00201.17^UDPGT^UDP-glucoronosyl and UDP-glucosyl transferase^310-436^E:2.5e-18	COG1819^Transferase	KEGG:ath:AT1G22370	GO:0043231^cellular_component^intracellular membrane-bounded organelle`GO:0015020^molecular_function^glucuronosyltransferase activity`GO:0080043^molecular_function^quercetin 3-O-glucosyltransferase activity`GO:0080044^molecular_function^quercetin 7-O-glucosyltransferase activity`GO:0008152^biological_process^metabolic process	GO:0016758^molecular_function^transferase activity, transferring hexosyl groups
PL7	#N/A	#N/A	LE01Gene04142	7.84608	7.9524	8.32995	9.22625	9.59647	10.6137	1.88234	6.17e-08	3.07e-07	LE01Gene04142	ALYA_KLEPN^ALYA_KLEPN^Q:359-634,H:15-99^39.4%ID^E:3.1e-05^RecName: Full=Alginate lyase	PF08787.10^Alginate_lyase2^Alginate lyase^41-253^E:2.1e-42	.	.	.	.
GH5	#N/A	#N/A	LE01Gene07850	7.94601	8.77957	8.51637	9.39415	10.9808	10.1913	1.87923	1.77e-06	7.03e-06	LE01Gene07850	EXG3_SCHPO^EXG3_SCHPO^Q:109-1578,H:4-448^30%ID^E:1.6e-58^RecName: Full=Glucan 1,3-beta-glucosidase 3	PF00150.17^Cellulase^Cellulase (glycosyl hydrolase family 5)^111-391^E:3.3e-17	.	KEGG:spo:SPBC2D10.05	GO:1990819^cellular_component^actin fusion focus`GO:0009986^cellular_component^cell surface`GO:0005737^cellular_component^cytoplasm`GO:0005829^cellular_component^cytosol`GO:0005576^cellular_component^extracellular region`GO:0005634^cellular_component^nucleus`GO:0046557^molecular_function^glucan endo-1,6-beta-glucosidase activity`GO:0004338^molecular_function^glucan exo-1,3-beta-glucosidase activi…	GO:0004553^molecular_function^hydrolase activity, hydrolyzing O-glycosyl compounds`GO:0005975^biological_process^carbohydrate metabolic process
GH28	#N/A	#N/A	LE01Gene13684	7.95732	8.02358	8.24136	10.11	10.0369	9.64472	1.86936	1.05e-07	5.06e-07	LE01Gene13684	RGXB_ASPNC^RGXB_ASPNC^Q:38-1276,H:1-416^43.2%ID^E:2.1e-95^RecName: Full=Alpha-L-rhamnosidase rgxB	PF00295.16^Glyco_hydro_28^Glycosyl hydrolases family 28^133-418^E:2.2e-39	.	KEGG:ang:ANI_1_1122034	GO:0005576^cellular_component^extracellular region`GO:0030596^molecular_function^alpha-L-rhamnosidase activity`GO:0004650^molecular_function^polygalacturonase activity`GO:0071555^biological_process^cell wall organization`GO:0000272^biological_process^polysaccharide catabolic process	GO:0004650^molecular_function^polygalacturonase activity`GO:0005975^biological_process^carbohydrate metabolic process
CBM50	#N/A	#N/A	LE01Gene13151	3.76761	4.03722	4.71254	5.83653	6.39427	5.80076	1.86767	0.000155015	0.000427627	LE01Gene13151	.	PF01476.19^LysM^LysM domain^132-171^E:9.9e-08`PF01476.19^LysM^LysM domain^181-226^E:4.5e-07	.	.	.	.
AA3	#N/A	#N/A	LE01Gene07753	9.21932	9.42642	9.6779	10.9147	11.0047	11.8149	1.85257	5.53e-05	0.000166935	LE01Gene07753	XPTC_EMENI^XPTC_EMENI^Q:103-1944,H:25-613^29.3%ID^E:1.5e-47^RecName: Full=Dehydrogenase xptC {ECO:0000303|PubMed:21351751}	PF05199.12^GMC_oxred_C^GMC oxidoreductase^63-204^E:3.9e-25	.	KEGG:ani:AN7998.2	GO:0050660^molecular_function^flavin adenine dinucleotide binding`GO:0016614^molecular_function^oxidoreductase activity, acting on CH-OH group of donors`GO:1900793^biological_process^shamixanthone biosynthetic process	GO:0016614^molecular_function^oxidoreductase activity, acting on CH-OH group of donors`GO:0055114^biological_process^oxidation-reduction process
GH105	#N/A	#N/A	LE01Gene10169	9.21932	9.13895	9.54394	11.2424	11.3182	10.6986	1.80172	3.21e-08	1.68e-07	LE01Gene10169	URHG1_BACSU^URHG1_BACSU^Q:513-1124,H:77-266^27.1%ID^E:1e-06^RecName: Full=Unsaturated rhamnogalacturonyl hydrolase YesR	PF07470.12^Glyco_hydro_88^Glycosyl Hydrolase Family 88^133-337^E:4.1e-14	.	.	.	.
GH17	#N/A	#N/A	LE01Gene05973	7.54984	7.26883	8.084	9.78079	9.46652	8.97441	1.77512	6.64e-05	0.000197188	LE01Gene05973	.	.	.	.	.	.
GH78	#N/A	#N/A	LE01Gene07596	7.31497	7.98019	8.84228	10.1977	9.20822	10.1888	1.75582	0.000597493	0.00148182	LE01Gene07596	.	PF17389.1^Bac_rhamnosid6H^Bacterial alpha-L-rhamnosidase 6 hairpin glycosidase domain^250-461^E:3.8e-15	.	.	.	.
GH79	#N/A	#N/A	LE01Gene06732	8.87611	8.84452	8.40915	10.4598	10.6417	10.2241	1.72914	3.75e-06	1.41e-05	LE01Gene06732	GUS79_ASPNC^GUS79_ASPNC^Q:195-1805,H:43-541^30.6%ID^E:1e-48^RecName: Full=Beta-glucuronidase {ECO:0000303|PubMed:18377882}	PF16862.4^Glyco_hydro_79C^Glycosyl hydrolase family 79 C-terminal beta domain^298-418^E:3.9e-22	.	.	.	.
AA3; AA8	Lignin Degrading Auxiliary enzyme	aryl-alcohol oxidase	LE01Gene04010	7.64387	8.57969	8.08935	9.275	10.3644	9.712	1.70274	2.6e-06	1.01e-05	LE01Gene04010	PDH3_LEUMG^PDH3_LEUMG^Q:151-1818,H:41-599^40.5%ID^E:2e-110^RecName: Full=Pyranose dehydrogenase 3 {ECO:0000303|PubMed:18097667}	PF00732.18^GMC_oxred_N^GMC oxidoreductase^33-342^E:2.9e-66`PF05199.12^GMC_oxred_C^GMC oxidoreductase^445-580^E:2.4e-35	.	.	GO:0005576^cellular_component^extracellular region`GO:0050660^molecular_function^flavin adenine dinucleotide binding`GO:0033718^molecular_function^pyranose dehydrogenase (acceptor) activity`GO:0005975^biological_process^carbohydrate metabolic process	GO:0016614^molecular_function^oxidoreductase activity, acting on CH-OH group of donors`GO:0050660^molecular_function^flavin adenine dinucleotide binding`GO:0055114^biological_process^oxidation-reduction process
GH18	#N/A	#N/A	LE01Gene07656	9.2814	9.85351	9.4822	11.2863	11.7609	10.3573	1.68728	5.04e-06	1.84e-05	LE01Gene07656	CHIA1_BACCI^CHIA1_BACCI^Q:2346-3308,H:154-451^27.9%ID^E:1.3e-27^RecName: Full=Chitinase A1	PF01062.20^Bestrophin^Bestrophin, RFP-TM, chloride channel^40-210^E:1.7e-14`PF01062.20^Bestrophin^Bestrophin, RFP-TM, chloride channel^385-509^E:3.2e-21`PF00704.27^Glyco_hydro_18^Glycosyl hydrolases family 18^589-957^E:2.1e-57	COG3781^UPF0187 protein	KEGG:ana:alr2987`KO:K08994	GO:0016021^cellular_component^integral component of membrane`GO:0005886^cellular_component^plasma membrane	GO:0005975^biological_process^carbohydrate metabolic process
GT1	#N/A	#N/A	LE01Gene13736	7.9057	7.50909	7.2509	9.25083	9.08012	9.32277	1.64578	9.3e-05	0.000267931	LE01Gene13736	UFOG1_FRAAN^UFOG1_FRAAN^Q:772-1242,H:235-392^37.6%ID^E:8.2e-17^RecName: Full=Anthocyanidin 3-O-glucosyltransferase 1	PF00201.17^UDPGT^UDP-glucoronosyl and UDP-glucosyl transferase^297-426^E:4.1e-19	COG1819^Transferase	KEGG:ath:AT1G22340	GO:0043231^cellular_component^intracellular membrane-bounded organelle`GO:0015020^molecular_function^glucuronosyltransferase activity`GO:0080043^molecular_function^quercetin 3-O-glucosyltransferase activity`GO:0080044^molecular_function^quercetin 7-O-glucosyltransferase activity`GO:0008152^biological_process^metabolic process	GO:0016758^molecular_function^transferase activity, transferring hexosyl groups
CE8	#N/A	#N/A	LE01Gene04913	7.29727	8.84149	8.8643	10.3104	9.85167	10.1913	1.63879	0.000557531	0.00139068	LE01Gene04913	URIC_EMENI^URIC_EMENI^Q:34-624,H:66-241^43.5%ID^E:6.1e-31^RecName: Full=Uricase	PF01014.17^Uricase^Uricase^27-81^E:5.6e-07`PF01014.17^Uricase^Uricase^102-215^E:5.4e-21`PF01095.18^Pectinesterase^Pectinesterase^451-669^E:2.5e-31	.	KEGG:ani:AN9470.2`KO:K00365	GO:0005576^cellular_component^extracellular region`GO:0005777^cellular_component^peroxisome`GO:0004846^molecular_function^urate oxidase activity`GO:0006145^biological_process^purine nucleobase catabolic process`GO:0019628^biological_process^urate catabolic process	GO:0030599^molecular_function^pectinesterase activity`GO:0042545^biological_process^cell wall modification`GO:0005618^cellular_component^cell wall
CE16	#N/A	#N/A	LE01Gene03376	9.77259	9.50122	10.125	11.7216	11.2568	11.2482	1.60524	2.23e-07	1.02e-06	LE01Gene03376	AES1_THIHE^AES1_THIHE^Q:232-936,H:63-293^30.8%ID^E:1.7e-26^RecName: Full=Acetylesterase {ECO:0000303|PubMed:24140638}	.	.	.	.	.
GH115	#N/A	#N/A	LE01Gene05655	9.53653	10.2227	10.3424	11.6978	11.3739	11.9039	1.6007	0.000202638	0.000548885	LE01Gene05655	.	.	.	.	.	.
AA7	#N/A	#N/A	LE01Gene00015	6.6158	7.20431	6.35228	8.43971	8.76785	7.56217	1.57952	0.000969021	0.0022998	LE01Gene00015	A2372_ARTBC^A2372_ARTBC^Q:326-1540,H:63-462^29.5%ID^E:3.7e-34^RecName: Full=Uncharacterized FAD-linked oxidoreductase ARB_02372 {ECO:0000305}	PF01565.22^FAD_binding_4^FAD binding domain^86-220^E:1.1e-20	COG0277^FAD linked oxidase domain protein	KEGG:abe:ARB_02372	GO:0005576^cellular_component^extracellular region`GO:0071949^molecular_function^FAD binding`GO:0016491^molecular_function^oxidoreductase activity	GO:0016491^molecular_function^oxidoreductase activity`GO:0050660^molecular_function^flavin adenine dinucleotide binding`GO:0055114^biological_process^oxidation-reduction process
GT1	#N/A	#N/A	LE01Gene00561	9.93161	10.404	10.6726	11.5535	12.1325	12.0705	1.57426	8.29e-13	9.08e-12	LE01Gene00561	U80A2_ARATH^U80A2_ARATH^Q:317-1612,H:191-611^47.1%ID^E:3.3e-116^RecName: Full=Sterol 3-beta-glucosyltransferase UGT80A2	PF03033.19^Glyco_transf_28^Glycosyltransferase family 28 N-terminal domain^110-258^E:2e-20`PF00201.17^UDPGT^UDP-glucoronosyl and UDP-glucosyl transferase^373-482^E:4.3e-05	COG1819^Transferase	KEGG:ath:AT3G07020`KO:K05841	GO:0043231^cellular_component^intracellular membrane-bounded organelle`GO:0016020^cellular_component^membrane`GO:0005886^cellular_component^plasma membrane`GO:0051507^molecular_function^beta-sitosterol UDP-glucosyltransferase activity`GO:0102203^molecular_function^brassicasterol glucosyltransferase activity`GO:0102205^molecular_function^cholesterol allpha-glucosyltransferase activity`GO:0080043^m…	GO:0016758^molecular_function^transferase activity, transferring hexosyl groups`GO:0005975^biological_process^carbohydrate metabolic process`GO:0030259^biological_process^lipid glycosylation
GT20	#N/A	#N/A	LE01Gene13404	12.3273	12.4526	13.0927	14.7196	14.1368	13.5844	1.55608	0.000913649	0.00218123	LE01Gene13404	TPS2_YEAST^TPS2_YEAST^Q:279-3200,H:26-848^32.7%ID^E:7.3e-129^RecName: Full=Trehalose-phosphatase	PF00982.20^Glyco_transf_20^Glycosyltransferase family 20^51-479^E:2e-123`PF00982.20^Glyco_transf_20^Glycosyltransferase family 20^592-646^E:5.8e-11`PF02358.15^Trehalose_PPase^Trehalose-phosphatase^711-930^E:6e-63	.	KEGG:sce:YDR074W`KO:K16055	GO:0005946^cellular_component^alpha,alpha-trehalose-phosphate synthase complex (UDP-forming)`GO:0004805^molecular_function^trehalose-phosphatase activity`GO:0034605^biological_process^cellular response to heat`GO:0005992^biological_process^trehalose biosynthetic process`GO:0070413^biological_process^trehalose metabolism in response to stress	GO:0003824^molecular_function^catalytic activity`GO:0005992^biological_process^trehalose biosynthetic process
GH128	#N/A	#N/A	LE01Gene02985	8.3453	9.40607	8.18246	10.3951	10.7107	9.57218	1.54991	0.0039322	0.00816252	LE01Gene02985	ASL1_SCHPO^ASL1_SCHPO^Q:195-884,H:296-529^35.1%ID^E:1.3e-25^RecName: Full=Alkali-sensitive linkage protein 1	PF11790.7^Glyco_hydro_cc^Glycosyl hydrolase catalytic core^67-293^E:3.4e-65	.	.	.	.
GT4	#N/A	#N/A	LE01Gene00638	13.3172	13.5191	13.419	15.0713	15.0557	14.7591	1.54826	2.23e-09	1.4e-08	LE01Gene00638	TREPH_PLEPU^TREPH_PLEPU^Q:33-2240,H:1-739^76.8%ID^E:0^RecName: Full=Trehalose phosphorylase {ECO:0000312|EMBL:ABR88135.1}	.	.	.	.	.
GH51	#N/A	#N/A	LE01Gene09692	7.57209	8.74435	9.21957	10.2836	9.79943	10.381	1.51643	0.00403108	0.00834998	LE01Gene09692	ABFA_ASPTN^ABFA_ASPTN^Q:362-2269,H:14-626^36.8%ID^E:9.8e-109^RecName: Full=Probable alpha-L-arabinofuranosidase A	.	.	.	.	.
CBM67	#N/A	#N/A	LE01Gene03573	8.6715	9.13153	8.22199	10.4939	10.1566	9.95657	1.49918	1.38e-08	7.72e-08	LE01Gene03573	.	.	.	.	.	.
CBM1; CE15	#N/A	#N/A	LE01Gene11487	8.49643	7.9524	8.06238	9.77618	9.78844	9.40201	1.47948	0.000447132	0.00113467	LE01Gene11487	GCE1_PHACR^GCE1_PHACR^Q:329-1732,H:1-472^66.7%ID^E:1e-169^RecName: Full=4-O-methyl-glucuronoyl methylesterase 1 {ECO:0000305}	PF00734.17^CBM_1^Fungal cellulose binding domain^24-52^E:2e-11	.	.	GO:0005576^cellular_component^extracellular region`GO:0052689^molecular_function^carboxylic ester hydrolase activity`GO:0030248^molecular_function^cellulose binding`GO:0005975^biological_process^carbohydrate metabolic process`GO:0046274^biological_process^lignin catabolic process	GO:0030248^molecular_function^cellulose binding`GO:0005975^biological_process^carbohydrate metabolic process`GO:0005576^cellular_component^extracellular region
GH106	#N/A	#N/A	LE01Gene12252	9.71709	10.3227	9.67256	11.394	11.8013	10.907	1.47807	0.000384879	0.000990451	LE01Gene12252	.	PF17132.3^Glyco_hydro_106^alpha-L-rhamnosidase^208-715^E:4e-24	.	.	.	.
GH3	Cellulase	beta-glucosidase	LE01Gene06170	8.95159	9.01813	9.08133	10.4463	10.7057	10.2116	1.45251	1.46e-07	6.9e-07	LE01Gene06170	BGLX_ECOLI^BGLX_ECOLI^Q:2529-4733,H:38-734^30.3%ID^E:7.6e-84^RecName: Full=Periplasmic beta-glucosidase	PF00933.20^Glyco_hydro_3^Glycosyl hydrolase family 3 N terminal domain^60-395^E:3.7e-51`PF01915.21^Glyco_hydro_3_C^Glycosyl hydrolase family 3 C-terminal domain^433-685^E:8.9e-48`PF14310.5^Fn3-like^Fibronectin type III-like domain^722-750^E:2.5e-07	COG1472^hydrolase family 3	KEGG:stm:STM2166`KO:K05349	GO:0042597^cellular_component^periplasmic space`GO:0005886^cellular_component^plasma membrane`GO:0008422^molecular_function^beta-glucosidase activity`GO:0102483^molecular_function^scopolin beta-glucosidase activity`GO:0009251^biological_process^glucan catabolic process	GO:0004553^molecular_function^hydrolase activity, hydrolyzing O-glycosyl compounds`GO:0005975^biological_process^carbohydrate metabolic process
GH5	#N/A	#N/A	LE01Gene07762	10.4074	10.3075	10.1825	11.7176	12.1182	11.2803	1.44422	8.58e-10	5.79e-09	LE01Gene07762	MANF_ASPFC^MANF_ASPFC^Q:73-996,H:114-433^24.8%ID^E:7e-08^RecName: Full=Probable mannan endo-1,4-beta-mannosidase F	PF00150.17^Cellulase^Cellulase (glycosyl hydrolase family 5)^40-303^E:3.6e-08`PF12937.6^F-box-like^F-box-like^426-480^E:2.7e-07	.	.	GO:0005576^cellular_component^extracellular region`GO:0030248^molecular_function^cellulose binding`GO:0016985^molecular_function^mannan endo-1,4-beta-mannosidase activity`GO:0005975^biological_process^carbohydrate metabolic process	GO:0004553^molecular_function^hydrolase activity, hydrolyzing O-glycosyl compounds`GO:0005975^biological_process^carbohydrate metabolic process`GO:0005515^molecular_function^protein binding
GH16	#N/A	#N/A	LE01Gene09459	5.71285	4.53379	6.24123	6.91616	7.02794	7.20627	1.41844	0.00141812	0.00325104	LE01Gene09459	GUB_PAEPO^GUB_PAEPO^Q:889-1413,H:60-209^22.8%ID^E:2.7e-05^RecName: Full=Beta-glucanase	.	.	.	.	.
GH5	#N/A	#N/A	LE01Gene11039	11.6476	11.2606	11.7078	12.5433	12.8966	13.3115	1.39975	0.000158703	0.000436666	LE01Gene11039	EXG_BLUGR^EXG_BLUGR^Q:344-1597,H:7-417^44.8%ID^E:1.1e-93^RecName: Full=Glucan 1,3-beta-glucosidase	PF00150.17^Cellulase^Cellulase (glycosyl hydrolase family 5)^85-219^E:2e-11	.	.	GO:0005576^cellular_component^extracellular region`GO:0004338^molecular_function^glucan exo-1,3-beta-glucosidase activity`GO:0005975^biological_process^carbohydrate metabolic process`GO:0071555^biological_process^cell wall organization	GO:0004553^molecular_function^hydrolase activity, hydrolyzing O-glycosyl compounds`GO:0005975^biological_process^carbohydrate metabolic process
GH106	#N/A	#N/A	LE01Gene12253	10.0696	9.82314	10.195	11.6098	11.5101	11.1421	1.39796	4.48e-13	5.12e-12	LE01Gene12253	.	PF17132.3^Glyco_hydro_106^alpha-L-rhamnosidase^204-729^E:2e-24	.	.	.	.
GH27	#N/A	#N/A	LE01Gene09625	8.64025	9.04732	9.38107	10.3461	10.3149	10.6466	1.39127	0.00355171	0.00744616	LE01Gene09625	AGALB_TALEM^AGALB_TALEM^Q:733-1890,H:21-449^42.2%ID^E:1.7e-94^RecName: Full=Probable alpha-galactosidase B	PF16499.4^Melibiase_2^Alpha galactosidase A^69-341^E:2e-55	.	.	GO:0005576^cellular_component^extracellular region`GO:0052692^molecular_function^raffinose alpha-galactosidase activity`GO:0005975^biological_process^carbohydrate metabolic process	GO:0004553^molecular_function^hydrolase activity, hydrolyzing O-glycosyl compounds`GO:0005975^biological_process^carbohydrate metabolic process
CBM20; CBM25; GH13	#N/A	#N/A	LE01Gene09188	9.23567	8.60133	9.1263	10.3606	10.489	10.3425	1.38744	0.00021019	0.000567775	LE01Gene09188	AMY_STRLM^AMY_STRLM^Q:429-2096,H:29-565^45.6%ID^E:1.1e-129^RecName: Full=Alpha-amylase	.	.	.	.	.
GH13; GT5	#N/A	#N/A	LE01Gene04657	11.7613	12.0204	12.107	13.3559	13.6458	12.9769	1.38183	3.04e-07	1.36e-06	LE01Gene04657	AGS1_SCHPO^AGS1_SCHPO^Q:129-7226,H:14-2410^41.6%ID^E:0^RecName: Full=Cell wall alpha-1,3-glucan synthase ags1	PF00128.23^Alpha-amylase^Alpha amylase, catalytic domain^103-358^E:5.3e-12`PF08323.10^Glyco_transf_5^Starch synthase catalytic domain^1183-1388^E:9.8e-14`PF00534.19^Glycos_transf_1^Glycosyl transferases group 1^1472-1574^E:3.1e-07	.	KEGG:spo:SPCC1281.01`KO:K00749	GO:0005619^cellular_component^ascospore wall`GO:0032153^cellular_component^cell division site`GO:0051286^cellular_component^cell tip`GO:0000935^cellular_component^division septum`GO:0009897^cellular_component^external side of plasma membrane`GO:0005887^cellular_component^integral component of plasma membrane`GO:0035841^cellular_component^new growing cell tip`GO:0035840^cellular_component^old grow…	GO:0003824^molecular_function^catalytic activity`GO:0005975^biological_process^carbohydrate metabolic process
CBM51; GH35	#N/A	#N/A	LE01Gene04812	10.1691	10.1475	10.5498	11.788	11.7198	11.5169	1.37919	0.00054746	0.0013673	LE01Gene04812	BGALB_ASPNC^BGALB_ASPNC^Q:1131-4082,H:42-1012^36.4%ID^E:5.1e-164^RecName: Full=Probable beta-galactosidase B	.	.	.	.	.
AA1	Lignin Oxidase	multicopper oxidase	LE01Gene01361	7.31497	6.53209	6.61236	8.45132	8.48616	7.60872	1.37828	7.43e-06	2.62e-05	LE01Gene01361	LAC2_AGABI^LAC2_AGABI^Q:757-2268,H:21-520^46.1%ID^E:2.4e-126^RecName: Full=Laccase-2	PF07732.14^Cu-oxidase_3^Multicopper oxidase^40-154^E:2.7e-27`PF00394.21^Cu-oxidase^Multicopper oxidase^167-318^E:1.2e-39`PF07731.13^Cu-oxidase_2^Multicopper oxidase^379-498^E:2.3e-32	.	.	GO:0005576^cellular_component^extracellular region`GO:0005507^molecular_function^copper ion binding`GO:0052716^molecular_function^hydroquinone:oxygen oxidoreductase activity`GO:0046274^biological_process^lignin catabolic process	GO:0005507^molecular_function^copper ion binding`GO:0055114^biological_process^oxidation-reduction process`GO:0016491^molecular_function^oxidoreductase activity
GH31	#N/A	#N/A	LE01Gene02438	9.72539	10.7968	11.4367	12.5108	11.5291	12.3	1.35842	0.00328754	0.00695523	LE01Gene02438	XYLS_ECOLI^XYLS_ECOLI^Q:64-2370,H:1-729^46%ID^E:3.1e-206^RecName: Full=Alpha-xylosidase	PF13802.5^Gal_mutarotas_2^Galactose mutarotase-like^187-245^E:1.9e-16`PF01055.25^Glyco_hydro_31^Glycosyl hydrolases family 31^267-699^E:2e-119	COG1501^hydrolase, family 31	KEGG:ecj:JW3631`KEGG:eco:b3656`KO:K01811	GO:0061634^molecular_function^alpha-D-xyloside xylohydrolase`GO:0030246^molecular_function^carbohydrate binding`GO:0042802^molecular_function^identical protein binding`GO:0080176^molecular_function^xyloglucan 1,6-alpha-xylosidase activity`GO:0005975^biological_process^carbohydrate metabolic process	GO:0004553^molecular_function^hydrolase activity, hydrolyzing O-glycosyl compounds`GO:0005975^biological_process^carbohydrate metabolic process
GH55	#N/A	#N/A	LE01Gene12491	8.21468	8.42245	8.2652	9.82462	9.6702	9.4282	1.3497	1.31e-16	2.57e-15	LE01Gene12491	EXG1_COCCA^EXG1_COCCA^Q:45-2321,H:26-781^40.1%ID^E:2e-157^RecName: Full=Glucan 1,3-beta-glucosidase	PF12708.6^Pectate_lyase_3^Pectate lyase superfamily protein^60-287^E:7.3e-79`PF12708.6^Pectate_lyase_3^Pectate lyase superfamily protein^419-487^E:5.6e-12	.	.	GO:0004338^molecular_function^glucan exo-1,3-beta-glucosidase activity`GO:0071555^biological_process^cell wall organization`GO:0008152^biological_process^metabolic process	.
GH85	#N/A	#N/A	LE01Gene01164	10.466	10.5604	11.0467	12.1474	12.1169	11.8468	1.32968	5.61e-11	4.56e-10	LE01Gene01164	ENAS1_ARATH^ENAS1_ARATH^Q:64-1101,H:14-329^32.6%ID^E:8e-43^RecName: Full=Cytosolic endo-beta-N-acetylglucosaminidase 1 {ECO:0000305}	.	.	.	.	.
GH3	Hemicellulase	beta-xylosidase	LE01Gene06168	8.77423	9.10148	9.72337	10.7645	10.1952	10.7085	1.32483	8.7e-07	3.62e-06	LE01Gene06168	BGLX_ECOLI^BGLX_ECOLI^Q:235-2982,H:24-750^25.1%ID^E:8.3e-63^RecName: Full=Periplasmic beta-glucosidase	PF00933.20^Glyco_hydro_3^Glycosyl hydrolase family 3 N terminal domain^110-382^E:1.2e-39`PF01915.21^Glyco_hydro_3_C^Glycosyl hydrolase family 3 C-terminal domain^433-843^E:5.6e-42`PF07691.11^PA14^PA14 domain^537-675^E:4.8e-10`PF14310.5^Fn3-like^Fibronectin type III-like domain^885-953^E:8.4e-13	.	.	GO:0005576^cellular_component^extracellular region`GO:0008422^molecular_function^beta-glucosidase activity`GO:0102483^molecular_function^scopolin beta-glucosidase activity`GO:0030245^biological_process^cellulose catabolic process	GO:0004553^molecular_function^hydrolase activity, hydrolyzing O-glycosyl compounds`GO:0005975^biological_process^carbohydrate metabolic process
GH16_1	#N/A	#N/A	LE01Gene11400	8.41671	8.77005	8.31632	9.81266	10.3917	8.83126	1.30077	0.00202238	0.00448521	LE01Gene11400	YHZ7_SCHPO^YHZ7_SCHPO^Q:183-1094,H:126-417^33.4%ID^E:3.5e-42^RecName: Full=Probable glycosidase C21B10.07	.	.	KEGG:spo:SPBC21B10.07	GO:0009277^cellular_component^fungal-type cell wall`GO:0016021^cellular_component^integral component of membrane`GO:0004553^molecular_function^hydrolase activity, hydrolyzing O-glycosyl compounds`GO:0071966^biological_process^fungal-type cell wall polysaccharide metabolic process	.
GT15	#N/A	#N/A	LE01Gene02724	9.02601	8.91534	9.26522	10.2717	10.7107	10.0565	1.29804	9.23e-11	7.29e-10	LE01Gene02724	MNT2_CANAL^MNT2_CANAL^Q:1047-1922,H:137-429^53.9%ID^E:2.1e-99^RecName: Full=Glycolipid 2-alpha-mannosyltransferase 2	PF01793.15^Glyco_transf_15^Glycolipid 2-alpha-mannosyltransferase^45-266^E:6.1e-91	.	KEGG:cal:CAALFM_C301830CA`KO:K10967	GO:0000139^cellular_component^Golgi membrane`GO:0016021^cellular_component^integral component of membrane`GO:0000026^molecular_function^alpha-1,2-mannosyltransferase activity`GO:0043710^biological_process^cell adhesion involved in multi-species biofilm formation`GO:0098609^biological_process^cell-cell adhesion`GO:0007160^biological_process^cell-matrix adhesion`GO:0051834^biological_process^evasio…	GO:0000030^molecular_function^mannosyltransferase activity`GO:0006486^biological_process^protein glycosylation`GO:0016020^cellular_component^membrane
GH15	#N/A	#N/A	LE01Gene13979	8.44109	8.38135	8.8549	9.78232	10.0396	9.75575	1.29273	3.86e-10	2.77e-09	LE01Gene13979	YAY3_SCHPO^YAY3_SCHPO^Q:122-589,H:417-572^55.8%ID^E:1.9e-47^RecName: Full=Uncharacterized protein C4H3.03c	PF00723.20^Glyco_hydro_15^Glycosyl hydrolases family 15^20-172^E:5.5e-18	.	KEGG:spo:SPAC4H3.03c	GO:0005829^cellular_component^cytosol`GO:0016021^cellular_component^integral component of membrane`GO:0005634^cellular_component^nucleus`GO:0004553^molecular_function^hydrolase activity, hydrolyzing O-glycosyl compounds`GO:0016052^biological_process^carbohydrate catabolic process`GO:0044264^biological_process^cellular polysaccharide metabolic process	.
GH92	#N/A	#N/A	LE01Gene07926	9.99611	10.5306	10.4944	11.9252	11.4406	11.4766	1.27209	0.000152809	0.000421839	LE01Gene07926	A7629_ARTBC^A7629_ARTBC^Q:380-2779,H:7-761^34.8%ID^E:1.5e-127^RecName: Full=Uncharacterized secreted glycosidase ARB_07629 {ECO:0000305}	.	.	.	.	.
AA2	Lignin Oxidase	Other peroxidase	LE01Gene03530	6.88825	6.59096	6.50429	8.1285	7.60205	8.00074	1.2646	2e-06	7.87e-06	LE01Gene03530	WSCD2_ARTBC^WSCD2_ARTBC^Q:358-1404,H:56-403^35.1%ID^E:5.1e-45^RecName: Full=WSC domain-containing protein ARB_07870 {ECO:0000305}	PF00141.22^peroxidase^Peroxidase^13-207^E:7e-22	COG0376^Bifunctional enzyme with both catalase and broad- spectrum peroxidase activity (By similarity)	KEGG:ath:AT4G32320`KO:K00434	GO:0005829^cellular_component^cytosol`GO:0004130^molecular_function^cytochrome-c peroxidase activity`GO:0020037^molecular_function^heme binding`GO:0016688^molecular_function^L-ascorbate peroxidase activity`GO:0046872^molecular_function^metal ion binding`GO:0004601^molecular_function^peroxidase activity`GO:0034599^biological_process^cellular response to oxidative stress`GO:0042744^biological_proce…	GO:0004601^molecular_function^peroxidase activity`GO:0020037^molecular_function^heme binding`GO:0006979^biological_process^response to oxidative stress`GO:0055114^biological_process^oxidation-reduction process
AA3	Lignin Degrading Auxiliary enzyme	alcohol oxidase	LE01Gene08342	6.38392	5.67551	6.33435	7.15274	7.25485	7.71892	1.2432	4.24e-05	0.000130843	LE01Gene08342	ALOX_CANBO^ALOX_CANBO^Q:1-1671,H:1-563^35.2%ID^E:7.5e-90^RecName: Full=Alcohol oxidase	.	.	.	.	.
GT15	#N/A	#N/A	LE01Gene02420	10.6808	10.3485	10.5312	11.4312	12.3401	11.1805	1.21483	8.55e-05	0.000248629	LE01Gene02420	MNT2_CANAL^MNT2_CANAL^Q:358-1353,H:133-440^30.5%ID^E:5.8e-46^RecName: Full=Glycolipid 2-alpha-mannosyltransferase 2	.	.	.	.	.
CBM51; GH35	#N/A	#N/A	LE01Gene08777	9.48859	9.19695	9.277	10.5244	10.4938	10.5936	1.21299	0.000127462	0.000357696	LE01Gene08777	BGALC_ASPNC^BGALC_ASPNC^Q:562-3456,H:23-976^38.7%ID^E:1.6e-182^RecName: Full=Probable beta-galactosidase C	PF05871.11^ESCRT-II^ESCRT-II complex subunit^1-53^E:2.9e-11`PF01301.18^Glyco_hydro_35^Glycosyl hydrolases family 35^141-472^E:4.4e-75`PF10435.8^BetaGal_dom2^Beta-galactosidase, domain 2^490-664^E:2.6e-42`PF13363.5^BetaGal_dom3^Beta-galactosidase, domain 3^686-748^E:3.4e-21`PF13364.5^BetaGal_dom4_5^Beta-galactosidase jelly roll domain^780-895^E:1.1e-18`PF13364.5^BetaGal_dom4_5^Beta-galactosidase j…	.	.	GO:0005576^cellular_component^extracellular region`GO:0004565^molecular_function^beta-galactosidase activity`GO:0000272^biological_process^polysaccharide catabolic process	GO:0071985^biological_process^multivesicular body sorting pathway`GO:0000814^cellular_component^ESCRT II complex
GT90	#N/A	#N/A	LE01Gene12108	8.77423	9.2865	9.84546	9.91549	10.7444	10.7515	1.15326	0.00056944	0.00141736	LE01Gene12108	CXT1_CRYNJ^CXT1_CRYNJ^Q:111-809,H:429-661^38.4%ID^E:4e-43^RecName: Full=Beta-1,2-xylosyltransferase 1	.	ENOG4111KZD^Glycosyltransferase family 90 protein	KEGG:cne:CNL04750`KO:K11702	GO:0012505^cellular_component^endomembrane system`GO:0016021^cellular_component^integral component of membrane`GO:0046527^molecular_function^glucosyltransferase activity`GO:0035252^molecular_function^UDP-xylosyltransferase activity`GO:0045227^biological_process^capsule polysaccharide biosynthetic process`GO:0006688^biological_process^glycosphingolipid biosynthetic process`GO:0009405^biological_pr…	.
GH5	#N/A	#N/A	LE01Gene08669	11.1703	11.6435	11.6008	12.5313	12.8582	12.4326	1.13256	1.14e-08	6.44e-08	LE01Gene08669	XYL5_PHACH^XYL5_PHACH^Q:26-1453,H:1-473^62.7%ID^E:1.1e-183^RecName: Full=Beta-xylosidase {ECO:0000303|PubMed:25300189}	PF00150.17^Cellulase^Cellulase (glycosyl hydrolase family 5)^81-349^E:4.8e-29`PF02627.19^CMD^Carboxymuconolactone decarboxylase family^528-587^E:1.6e-09`PF12697.6^Abhydrolase_6^Alpha/beta hydrolase family^776-1050^E:1.7e-09	.	.	GO:0005576^cellular_component^extracellular region`GO:0009044^molecular_function^xylan 1,4-beta-xylosidase activity`GO:0005975^biological_process^carbohydrate metabolic process	GO:0004553^molecular_function^hydrolase activity, hydrolyzing O-glycosyl compounds`GO:0005975^biological_process^carbohydrate metabolic process`GO:0051920^molecular_function^peroxiredoxin activity`GO:0055114^biological_process^oxidation-reduction process
GH154	#N/A	#N/A	LE01Gene11296	9.59383	9.74428	10.2569	10.9493	10.7678	11.2988	1.12942	6.96e-06	2.47e-05	LE01Gene11296	.	.	.	.	.	.
AA7	#N/A	#N/A	LE01Gene00047	11.6042	11.7862	11.6636	12.6538	12.4936	13.1729	1.11705	0.0027475	0.00592093	LE01Gene00047	A2372_ARTBC^A2372_ARTBC^Q:584-1669,H:43-394^29.8%ID^E:1.7e-33^RecName: Full=Uncharacterized FAD-linked oxidoreductase ARB_02372 {ECO:0000305}	PF01565.22^FAD_binding_4^FAD binding domain^84-218^E:6.9e-18	COG0277^FAD linked oxidase domain protein	KEGG:abe:ARB_02372	GO:0005576^cellular_component^extracellular region`GO:0071949^molecular_function^FAD binding`GO:0016491^molecular_function^oxidoreductase activity	GO:0016491^molecular_function^oxidoreductase activity`GO:0050660^molecular_function^flavin adenine dinucleotide binding`GO:0055114^biological_process^oxidation-reduction process
AA3	#N/A	#N/A	LE01Gene12448	10.1679	10.3634	10.6346	11.4621	11.389	11.6382	1.09953	8.46e-12	7.84e-11	LE01Gene12448	CITC_MONPU^CITC_MONPU^Q:1372-3138,H:9-609^34.4%ID^E:1.2e-80^RecName: Full=Dehydrogenase mpl7 {ECO:0000303|PubMed:27913218}	.	.	.	.	.
GH145	#N/A	#N/A	LE01Gene01268	9.12214	9.48191	9.73537	10.589	10.4446	10.5265	1.05438	1.94e-06	7.64e-06	LE01Gene01268	.	PF15892.4^BNR_4^BNR repeat-containing family member^68-374^E:2.4e-59	.	.	.	.
GH16	#N/A	#N/A	LE01Gene02697	11.5626	11.4464	11.2202	12.3207	12.4396	12.6075	1.04433	3.79e-05	0.000118027	LE01Gene02697	BGBP_PENMO^BGBP_PENMO^Q:842-2017,H:31-360^34.1%ID^E:5.9e-55^RecName: Full=Beta-1,3-glucan-binding protein {ECO:0000312|EMBL:AAM21213.1}	.	.	.	.	.
GH95	#N/A	#N/A	LE01Gene04279	10.5478	10.8338	11.2758	12.1294	11.8204	11.9082	1.04173	0.00457927	0.00939398	LE01Gene04279	AFCA_ASPNC^AFCA_ASPNC^Q:324-2636,H:5-760^38.4%ID^E:3.9e-148^RecName: Full=Probable alpha-fucosidase A	PF14498.5^Glyco_hyd_65N_2^Glycosyl hydrolase family 65, N-terminal domain^68-319^E:4.1e-47	.	.	GO:0005576^cellular_component^extracellular region`GO:0004560^molecular_function^alpha-L-fucosidase activity`GO:0000272^biological_process^polysaccharide catabolic process	.
GH16	#N/A	#N/A	LE01Gene06326	6.63001	6.86588	6.59741	7.30563	7.8817	7.9474	1.04164	3.77e-06	1.41e-05	LE01Gene06326	.	PF00722.20^Glyco_hydro_16^Glycosyl hydrolases family 16^159-306^E:5.9e-10	.	.	.	GO:0004553^molecular_function^hydrolase activity, hydrolyzing O-glycosyl compounds`GO:0005975^biological_process^carbohydrate metabolic process
GH79	#N/A	#N/A	LE01Gene05168	10.5974	10.5325	10.6264	11.5381	11.748	11.5654	1.03477	1.19e-12	1.27e-11	LE01Gene05168	GUS79_ASPNC^GUS79_ASPNC^Q:973-2427,H:53-541^25.2%ID^E:9.9e-15^RecName: Full=Beta-glucuronidase {ECO:0000303|PubMed:18377882}	.	.	.	.	.
AA1	Lignin Oxidase	multicopper oxidase	LE01Gene06108	9.79641	9.54282	10.3026	10.8445	10.9669	11.0118	1.02777	5.81e-06	2.1e-05	LE01Gene06108	LAC1_CRYNB^LAC1_CRYNB^Q:198-1814,H:43-560^30.4%ID^E:4.7e-61^RecName: Full=Laccase-1 {ECO:0000305}	.	.	.	.	.
GH16_1	#N/A	#N/A	LE01Gene07047	9.68852	9.8384	10.348	10.7784	11.1024	11.1322	1.02708	2.01e-08	1.08e-07	LE01Gene07047	EGLX_NEOFI^EGLX_NEOFI^Q:125-853,H:95-344^31.9%ID^E:6.2e-28^RecName: Full=Probable endo-1,3(4)-beta-glucanase NFIA_089530	.	.	.	.	.
AA3	#N/A	#N/A	LE01Gene14012	10.7062	10.2953	10.5014	11.4169	11.7943	11.3152	1.01373	4.68e-06	1.72e-05	LE01Gene14012	BETA_VIBVU^BETA_VIBVU^Q:142-1794,H:5-539^28%ID^E:3e-38^RecName: Full=Oxygen-dependent choline dehydrogenase {ECO:0000255|HAMAP-Rule:MF_00750}	PF00732.18^GMC_oxred_N^GMC oxidoreductase^48-345^E:6.1e-30`PF05199.12^GMC_oxred_C^GMC oxidoreductase^445-585^E:3.9e-25	COG2303^oxidoreductase	KEGG:mmu:218865`KO:K00108	GO:0005743^cellular_component^mitochondrial inner membrane`GO:0005739^cellular_component^mitochondrion`GO:0008812^molecular_function^choline dehydrogenase activity`GO:0050660^molecular_function^flavin adenine dinucleotide binding`GO:0019285^biological_process^glycine betaine biosynthetic process from choline	GO:0016614^molecular_function^oxidoreductase activity, acting on CH-OH group of donors`GO:0050660^molecular_function^flavin adenine dinucleotide binding`GO:0055114^biological_process^oxidation-reduction process
AA9	Cellulase	Endo-beta-1,4-glucanase	LE01Gene03338	11.3371	11.5169	11.2232	10.2057	10.6408	10.2015	-1.00019	3.12e-06	1.19e-05	LE01Gene03338	CEL1_AGABI^CEL1_AGABI^Q:387-1118,H:16-253^33.5%ID^E:2.9e-24^RecName: Full=Cellulose-growth-specific protein	PF03443.13^Glyco_hydro_61^Glycosyl hydrolase family 61^23-240^E:1.6e-50	.	KEGG:tre:TRIREDRAFT_120961	GO:0005576^cellular_component^extracellular region`GO:0008810^molecular_function^cellulase activity`GO:0046872^molecular_function^metal ion binding`GO:0030245^biological_process^cellulose catabolic process	.
GH76	#N/A	#N/A	LE01Gene10275	10.668	11.1826	10.765	9.70518	10.176	9.58582	-1.04486	0.00185708	0.00415126	LE01Gene10275	.	.	.	.	.	.
GT59	#N/A	#N/A	LE01Gene00093	11.5426	11.6388	11.2641	10.4798	10.2772	10.5345	-1.05633	1.6e-08	8.79e-08	LE01Gene00093	ALG10_ARATH^ALG10_ARATH^Q:55-1341,H:21-495^33.7%ID^E:9.2e-58^RecName: Full=Dol-P-Glc:Glc(2)Man(9)GlcNAc(2)-PP-Dol alpha-1,2-glucosyltransferase {ECO:0000305}	.	.	.	.	.
GT22	#N/A	#N/A	LE01Gene00318	11.5213	11.5026	11.2611	10.417	10.3247	10.3436	-1.07136	2.23e-05	7.26e-05	LE01Gene00318	ALG9_SCHPO^ALG9_SCHPO^Q:247-2178,H:11-565^35.8%ID^E:3.5e-98^RecName: Full=Alpha-1,2-mannosyltransferase alg9	PF03901.16^Glyco_transf_22^Alg9-like mannosyltransferase family^53-530^E:9.1e-76	.	KEGG:spo:SPAC1834.05`KO:K03846	GO:0005783^cellular_component^endoplasmic reticulum`GO:0030176^cellular_component^integral component of endoplasmic reticulum membrane`GO:0052926^molecular_function^dol-P-Man:Man(6)GlcNAc(2)-PP-Dol alpha-1,2-mannosyltransferase activity`GO:0052918^molecular_function^dol-P-Man:Man(8)GlcNAc(2)-PP-Dol alpha-1,2-mannosyltransferase activity`GO:0000030^molecular_function^mannosyltransferase activity`G…	GO:0016757^molecular_function^transferase activity, transferring glycosyl groups
CE17	#N/A	#N/A	LE01Gene05798	12.8333	12.8652	12.8657	11.7544	11.7492	11.844	-1.07187	1.47e-08	8.17e-08	LE01Gene05798	RWD2B_HUMAN^RWD2B_HUMAN^Q:414-653,H:194-271^40%ID^E:5.2e-11^RecName: Full=RWD domain-containing protein 2B	.	.	.	.	.
GT90	#N/A	#N/A	LE01Gene12784	12.3957	12.516	12.3632	11.1739	11.0954	11.5965	-1.12096	1.56e-05	5.21e-05	LE01Gene12784	CXT1_CRYNJ^CXT1_CRYNJ^Q:191-2332,H:116-661^23%ID^E:7.2e-29^RecName: Full=Beta-1,2-xylosyltransferase 1	.	.	.	.	.
GT39	#N/A	#N/A	LE01Gene08458	13.3524	13.4694	13.491	12.2683	11.9931	12.5604	-1.14654	1.61e-08	8.87e-08	LE01Gene08458	PMT1_CANAL^PMT1_CANAL^Q:202-2313,H:60-760^46.9%ID^E:3.7e-174^RecName: Full=Dolichyl-phosphate-mannose--protein mannosyltransferase 1	PF02366.17^PMT^Dolichyl-phosphate-mannose-protein mannosyltransferase^81-322^E:4.7e-81`PF13231.5^PMT_2^Dolichyl-phosphate-mannose-protein mannosyltransferase^158-309^E:1.6e-06`PF02815.18^MIR^MIR domain^369-542^E:3.5e-38`PF16192.4^PMT_4TMC^C-terminal four TMM region of protein-O-mannosyltransferase^565-756^E:8.7e-65	.	KEGG:cal:CAALFM_C702890CA`KO:K00728	GO:0005789^cellular_component^endoplasmic reticulum membrane`GO:0016021^cellular_component^integral component of membrane`GO:0005886^cellular_component^plasma membrane`GO:0004169^molecular_function^dolichyl-phosphate-mannose-protein mannosyltransferase activity`GO:0000030^molecular_function^mannosyltransferase activity`GO:0031589^biological_process^cell-substrate adhesion`GO:0035690^biological_pr…	GO:0000030^molecular_function^mannosyltransferase activity`GO:0006493^biological_process^protein O-linked glycosylation`GO:0016020^cellular_component^membrane
CBM43; GH72	#N/A	#N/A	LE01Gene08573	14.2144	14.2652	14.2084	12.8872	13.1538	12.8466	-1.26056	1.05e-13	1.35e-12	LE01Gene08573	GEL4_ASPFC^GEL4_ASPFC^Q:40-1509,H:11-481^38.4%ID^E:1.1e-81^RecName: Full=1,3-beta-glucanosyltransferase gel4	PF03198.13^Glyco_hydro_72^Glucanosyltransferase^51-361^E:2.3e-85`PF07983.12^X8^X8 domain^411-490^E:4.2e-17	.	KEGG:spo:SPAC19B12.02c	GO:0031362^cellular_component^anchored component of external side of plasma membrane`GO:0032153^cellular_component^cell division site`GO:0071944^cellular_component^cell periphery`GO:0043188^cellular_component^cell septum edging`GO:0005576^cellular_component^extracellular region`GO:0009277^cellular_component^fungal-type cell wall`GO:0035841^cellular_component^new growing cell tip`GO:0035840^cellul…	.
GH5	#N/A	#N/A	LE01Gene00614	7.35829	7.23231	7.32538	5.63395	6.29122	6.11213	-1.28228	2.09e-05	6.81e-05	LE01Gene00614	EXG3_SCHPO^EXG3_SCHPO^Q:180-1226,H:5-351^32.8%ID^E:1.4e-46^RecName: Full=Glucan 1,3-beta-glucosidase 3	.	.	.	.	.
GH13; GT4; GT5	#N/A	#N/A	LE01Gene03470	14.5693	14.5469	14.36	13.1797	13.2341	13.1815	-1.29653	9.21e-15	1.4e-13	LE01Gene03470	AGS1_SCHPO^AGS1_SCHPO^Q:108-7061,H:17-2410^44%ID^E:0^RecName: Full=Cell wall alpha-1,3-glucan synthase ags1	.	.	.	.	.
GT69	#N/A	#N/A	LE01Gene05799	12.6353	12.504	12.4913	11.1185	11.1535	11.3652	-1.32887	8.4e-11	6.67e-10	LE01Gene05799	CMT1_CRYNJ^CMT1_CRYNJ^Q:438-1373,H:76-399^33.1%ID^E:8.8e-37^RecName: Full=Alpha-1,3-mannosyltransferase CMT1	.	.	.	.	.
GH31	#N/A	#N/A	LE01Gene04444	12.8853	13.0042	13.0105	11.6025	11.2811	11.878	-1.36048	1.92e-07	8.87e-07	LE01Gene04444	GLU2A_SCHPO^GLU2A_SCHPO^Q:319-2832,H:31-850^43.9%ID^E:4.9e-210^RecName: Full=Glucosidase 2 subunit alpha {ECO:0000250|UniProtKB:P38138}	.	.	.	.	.
GH9	Cellulase	Endo-beta-1,4-glucanase	LE01Gene08227	11.3834	11.327	11.2753	10.0141	9.83039	9.94452	-1.39851	2.82e-22	1.2e-20	LE01Gene08227	GUN4_THEFU^GUN4_THEFU^Q:106-1608,H:36-485^37.1%ID^E:5.9e-72^RecName: Full=Endoglucanase E-4	PF00759.18^Glyco_hydro_9^Glycosyl hydrolase family 9^53-532^E:5e-108	ENOG410XPC9^hydrolase family	.	GO:0008810^molecular_function^cellulase activity`GO:0030248^molecular_function^cellulose binding`GO:0030245^biological_process^cellulose catabolic process	GO:0004553^molecular_function^hydrolase activity, hydrolyzing O-glycosyl compounds`GO:0005975^biological_process^carbohydrate metabolic process
CE17	#N/A	#N/A	LE01Gene12023	12.616	12.5207	12.6474	11.2284	10.9072	11.3709	-1.41457	6.62e-10	4.58e-09	LE01Gene12023	.	.	.	.	.	.
GT39	#N/A	#N/A	LE01Gene10924	13.4208	13.4315	13.3872	11.7703	11.9086	12.1647	-1.45638	1.02e-13	1.31e-12	LE01Gene10924	PMT4_YEAST^PMT4_YEAST^Q:248-2329,H:56-748^44.7%ID^E:1.5e-176^RecName: Full=Dolichyl-phosphate-mannose--protein mannosyltransferase 4	PF02366.17^PMT^Dolichyl-phosphate-mannose-protein mannosyltransferase^59-304^E:2.5e-83`PF13231.5^PMT_2^Dolichyl-phosphate-mannose-protein mannosyltransferase^141-292^E:1.7e-06`PF02815.18^MIR^MIR domain^351-513^E:2.8e-17`PF16192.4^PMT_4TMC^C-terminal four TMM region of protein-O-mannosyltransferase^544-759^E:1.9e-60	.	KEGG:sce:YJR143C`KO:K00728	GO:0097582^cellular_component^dolichyl-phosphate-mannose-protein mannosyltransferase Pmt1p-Pmt2p dimer complex`GO:0097586^cellular_component^dolichyl-phosphate-mannose-protein mannosyltransferase Pmt4p homodimer complex`GO:0016021^cellular_component^integral component of membrane`GO:0004169^molecular_function^dolichyl-phosphate-mannose-protein mannosyltransferase activity`GO:0042802^molecular_fun…	GO:0000030^molecular_function^mannosyltransferase activity`GO:0006493^biological_process^protein O-linked glycosylation`GO:0016020^cellular_component^membrane
CE4	#N/A	#N/A	LE01Gene11812	15.2256	15.2698	15.253	13.7534	13.6161	13.7864	-1.52915	2.75e-13	3.26e-12	LE01Gene11812	CDA_AMYRO^CDA_AMYRO^Q:503-1291,H:67-352^34.1%ID^E:5.7e-38^RecName: Full=Chitin deacetylase	PF01522.20^Polysacc_deac_1^Polysaccharide deacetylase^251-361^E:9.5e-28	.	.	GO:0004099^molecular_function^chitin deacetylase activity`GO:0006032^biological_process^chitin catabolic process`GO:0000272^biological_process^polysaccharide catabolic process	GO:0016810^molecular_function^hydrolase activity, acting on carbon-nitrogen (but not peptide) bonds`GO:0005975^biological_process^carbohydrate metabolic process
AA5	Lignin Degrading Auxiliary enzyme	Galactose oxidase	LE01Gene12661	13.3477	13.6967	13.6233	12.1873	11.9876	11.8149	-1.55913	7.01e-11	5.61e-10	LE01Gene12661	GLOX_PHACH^GLOX_PHACH^Q:180-1985,H:3-553^31%ID^E:8.6e-66^RecName: Full=Aldehyde oxidase GLOX {ECO:0000305}	PF07250.10^Glyoxal_oxid_N^Glyoxal oxidase N-terminus^206-308^E:2e-14`PF09118.10^DUF1929^Domain of unknown function (DUF1929)^488-596^E:1.8e-24	.	.	GO:0005618^cellular_component^cell wall`GO:0005615^cellular_component^extracellular space`GO:0004031^molecular_function^aldehyde oxidase activity`GO:0102797^molecular_function^geranial:oxygen oxidoreductase activity`GO:0102798^molecular_function^heptaldehyde:oxygen oxidoreductase activity`GO:0050832^biological_process^defense response to fungus	.
GT66	#N/A	#N/A	LE01Gene01107	14.3482	14.4192	14.253	12.6139	12.5199	13.0726	-1.58562	1.24e-10	9.54e-10	LE01Gene01107	STT3_SCHPO^STT3_SCHPO^Q:279-2516,H:24-742^59%ID^E:4.6e-256^RecName: Full=Dolichyl-diphosphooligosaccharide--protein glycosyltransferase subunit stt3	PF02516.13^STT3^Oligosaccharyl transferase STT3 subunit^23-535^E:1.2e-138	.	KEGG:spo:SPBC1271.02`KO:K07151	GO:0005783^cellular_component^endoplasmic reticulum`GO:0016021^cellular_component^integral component of membrane`GO:0008250^cellular_component^oligosaccharyltransferase complex`GO:0004576^molecular_function^oligosaccharyl transferase activity`GO:0043687^biological_process^post-translational protein modification`GO:0006487^biological_process^protein N-linked glycosylation`GO:0018279^biological_pro…	GO:0004576^molecular_function^oligosaccharyl transferase activity`GO:0006486^biological_process^protein glycosylation`GO:0016020^cellular_component^membrane
GH37	#N/A	#N/A	LE01Gene01228	13.9393	13.7276	13.5235	12.173	12.2046	12.0781	-1.58744	3.78e-10	2.72e-09	LE01Gene01228	TREB_EMENI^TREB_EMENI^Q:99-2294,H:29-748^54.9%ID^E:9e-236^RecName: Full=Neutral trehalase	PF07492.10^Trehalase_Ca-bi^Neutral trehalase Ca2+ binding domain^100-129^E:6.4e-15`PF01204.17^Trehalase^Trehalase^159-734^E:1.1e-167	.	KEGG:ani:AN5635.2`KO:K01194	GO:0005737^cellular_component^cytoplasm`GO:0004555^molecular_function^alpha,alpha-trehalase activity`GO:0005509^molecular_function^calcium ion binding`GO:0015927^molecular_function^trehalase activity`GO:0030437^biological_process^ascospore formation`GO:0034605^biological_process^cellular response to heat`GO:0009267^biological_process^cellular response to starvation`GO:1903134^biological_process^t…	GO:0004555^molecular_function^alpha,alpha-trehalase activity`GO:0005509^molecular_function^calcium ion binding`GO:0005993^biological_process^trehalose catabolic process`GO:0005737^cellular_component^cytoplasm`GO:0005991^biological_process^trehalose metabolic process
GH71	#N/A	#N/A	LE01Gene04239	12.2578	12.209	11.853	10.3901	10.0115	10.8532	-1.65897	5.9e-11	4.79e-10	LE01Gene04239	AGN1_SCHPO^AGN1_SCHPO^Q:384-1940,H:21-420^34%ID^E:4.9e-59^RecName: Full=Glucan endo-1,3-alpha-glucosidase agn1	.	.	.	.	.
GH13	#N/A	#N/A	LE01Gene01055	10.5599	10.6357	10.3289	8.74987	8.57659	9.15778	-1.66786	2.01e-20	6.81e-19	LE01Gene01055	AMY_GEOSE^AMY_GEOSE^Q:153-1580,H:39-515^42.1%ID^E:2.3e-104^RecName: Full=Alpha-amylase	PF00128.23^Alpha-amylase^Alpha amylase, catalytic domain^54-390^E:1.7e-20	.	.	GO:0005576^cellular_component^extracellular region`GO:0004556^molecular_function^alpha-amylase activity`GO:0103025^molecular_function^alpha-amylase activity (releasing maltohexaose)`GO:0005509^molecular_function^calcium ion binding`GO:0005975^biological_process^carbohydrate metabolic process	GO:0003824^molecular_function^catalytic activity`GO:0005975^biological_process^carbohydrate metabolic process
GT21	#N/A	#N/A	LE01Gene00486	12.374	12.1597	12.1076	10.6253	10.3697	10.3675	-1.75973	4.68e-18	1.15e-16	LE01Gene00486	CEGT_CRYNH^CEGT_CRYNH^Q:174-1385,H:16-442^43.1%ID^E:3.2e-88^RecName: Full=Ceramide glucosyltransferase {ECO:0000250|UniProtKB:Q16739}	PF00535.25^Glycos_transf_2^Glycosyl transferase family 2^75-238^E:7.4e-05`PF13641.5^Glyco_tranf_2_3^Glycosyltransferase like family 2^76-315^E:2.2e-16`PF13506.5^Glyco_transf_21^Glycosyl transferase family 21^116-243^E:2.2e-21`PF13632.5^Glyco_trans_2_3^Glycosyl transferase family group 2^152-368^E:2e-06	.	.	GO:0000139^cellular_component^Golgi membrane`GO:0016021^cellular_component^integral component of membrane`GO:0008120^molecular_function^ceramide glucosyltransferase activity`GO:0102769^molecular_function^dihydroceramide glucosyltransferase activity`GO:0006665^biological_process^sphingolipid metabolic process	GO:0016757^molecular_function^transferase activity, transferring glycosyl groups
AA14	#N/A	#N/A	LE01Gene02669	12.2836	12.3091	12.0974	10.7164	9.99519	10.4009	-1.83317	7.83e-19	2.15e-17	LE01Gene02669	.	.	.	.	.	.
GH26	#N/A	#N/A	LE01Gene13721	10.61	11.0746	10.876	9.44152	9.11323	8.30867	-1.83956	1.28e-06	5.2e-06	LE01Gene13721	.	PF02156.14^Glyco_hydro_26^Glycosyl hydrolase family 26^152-276^E:2.8e-06	.	.	.	GO:0004553^molecular_function^hydrolase activity, hydrolyzing O-glycosyl compounds
AA9	Cellulase	Endo-beta-1,4-glucanase	LE01Gene14047	13.7881	13.7965	13.8093	12.017	11.6	12.1831	-1.84471	2.7e-19	7.93e-18	LE01Gene14047	GUN4_HYPJE^GUN4_HYPJE^Q:313-1047,H:5-252^34.9%ID^E:2.8e-25^RecName: Full=Endoglucanase-4	.	.	.	.	.
PL1	Pectinase	pectate lyase	LE01Gene12359	7.87022	8.01823	7.64914	5.90571	6.3264	5.63073	-1.88724	0.00305656	0.00651729	LE01Gene12359	PLYC_ASPFC^PLYC_ASPFC^Q:34-1089,H:10-365^36.8%ID^E:1.5e-43^RecName: Full=Probable pectate lyase C	.	.	KEGG:afv:AFLA_002010	GO:0005576^cellular_component^extracellular region`GO:0046872^molecular_function^metal ion binding`GO:0030570^molecular_function^pectate lyase activity`GO:0071555^biological_process^cell wall organization`GO:0000272^biological_process^polysaccharide catabolic process	.
GT69	#N/A	#N/A	LE01Gene09778	12.9499	12.7112	12.6806	10.9007	10.659	11.0945	-1.89065	1.99e-13	2.42e-12	LE01Gene09778	.	.	.	.	.	.
GH16	#N/A	#N/A	LE01Gene11628	11.5829	11.5254	11.1263	9.13555	10.0475	9.12078	-1.92329	1.94e-11	1.7e-10	LE01Gene11628	BGBP_PENMO^BGBP_PENMO^Q:721-1767,H:31-361^39.2%ID^E:1.7e-55^RecName: Full=Beta-1,3-glucan-binding protein {ECO:0000312|EMBL:AAM21213.1}	.	.	.	.	.
GH13	#N/A	#N/A	LE01Gene13578	13.1236	12.9985	12.976	10.9105	11.2046	10.9551	-2.00537	1.39e-19	4.25e-18	LE01Gene13578	AMY1_SCHOC^AMY1_SCHOC^Q:172-1581,H:36-511^45.1%ID^E:5e-114^RecName: Full=Alpha-amylase 1	PF00128.23^Alpha-amylase^Alpha amylase, catalytic domain^98-396^E:9.1e-48`PF09260.10^DUF1966^Domain of unknown function (DUF1966)^450-526^E:2.6e-18	.	.	GO:0005576^cellular_component^extracellular region`GO:0004556^molecular_function^alpha-amylase activity`GO:0103025^molecular_function^alpha-amylase activity (releasing maltohexaose)`GO:0005509^molecular_function^calcium ion binding`GO:0016052^biological_process^carbohydrate catabolic process	GO:0003824^molecular_function^catalytic activity`GO:0005975^biological_process^carbohydrate metabolic process`GO:0004556^molecular_function^alpha-amylase activity`GO:0005509^molecular_function^calcium ion binding`GO:0016052^biological_process^carbohydrate catabolic process
CBM18; GH16	#N/A	#N/A	LE01Gene11302	12.7026	12.8204	12.891	10.6347	10.6914	10.5545	-2.17949	3.07e-18	7.72e-17	LE01Gene11302	CRF2_ASPFU^CRF2_ASPFU^Q:52-1098,H:6-346^43.2%ID^E:4.9e-73^RecName: Full=Probable glycosidase crf2	PF00722.20^Glyco_hydro_16^Glycosyl hydrolases family 16^112-290^E:3.2e-40	.	KEGG:afm:AFUA_2G03120	GO:0031225^cellular_component^anchored component of membrane`GO:0009277^cellular_component^fungal-type cell wall`GO:0005886^cellular_component^plasma membrane`GO:0004553^molecular_function^hydrolase activity, hydrolyzing O-glycosyl compounds`GO:0005975^biological_process^carbohydrate metabolic process`GO:0071555^biological_process^cell wall organization	GO:0004553^molecular_function^hydrolase activity, hydrolyzing O-glycosyl compounds`GO:0005975^biological_process^carbohydrate metabolic process
CE17	#N/A	#N/A	LE01Gene12021	11.6723	12.0234	12.2498	10.1722	9.22928	9.74537	-2.23607	1.55e-14	2.28e-13	LE01Gene12021	.	.	.	.	.	.
GT90	#N/A	#N/A	LE01Gene00533	9.49249	9.25499	9.05148	7.61888	6.58061	6.66097	-2.25	2.78e-10	2.03e-09	LE01Gene00533	CXT1_CRYNJ^CXT1_CRYNJ^Q:328-1965,H:140-661^31.8%ID^E:1.6e-75^RecName: Full=Beta-1,2-xylosyltransferase 1	PF05686.11^Glyco_transf_90^Glycosyl transferase family 90^529-653^E:4.1e-19	ENOG4111KZD^Glycosyltransferase family 90 protein	KEGG:cne:CNL04750`KO:K11702	GO:0012505^cellular_component^endomembrane system`GO:0016021^cellular_component^integral component of membrane`GO:0046527^molecular_function^glucosyltransferase activity`GO:0035252^molecular_function^UDP-xylosyltransferase activity`GO:0045227^biological_process^capsule polysaccharide biosynthetic process`GO:0006688^biological_process^glycosphingolipid biosynthetic process`GO:0009405^biological_pr…	.
GH13	#N/A	#N/A	LE01Gene12213	13.9344	13.9122	13.9523	12.0166	11.3807	11.464	-2.28424	1.97e-22	8.62e-21	LE01Gene12213	AMYB_ASPAW^AMYB_ASPAW^Q:192-1664,H:15-498^46.6%ID^E:6.8e-118^RecName: Full=Alpha-amylase B	.	.	.	.	.
GH128	#N/A	#N/A	LE01Gene13878	16.5979	16.4656	16.2726	14.0995	14.1237	14.2081	-2.30703	5.19e-33	9.45e-31	LE01Gene13878	ASL1_SCHPO^ASL1_SCHPO^Q:490-1191,H:299-529^30.8%ID^E:1.3e-21^RecName: Full=Alkali-sensitive linkage protein 1	.	.	.	.	.
GH5	#N/A	#N/A	LE01Gene11040	13.6479	13.2276	13.0631	10.9369	11.1742	10.8914	-2.32869	6.81e-07	2.88e-06	LE01Gene11040	EXG_BLUGR^EXG_BLUGR^Q:152-1402,H:4-416^45.3%ID^E:1.9e-95^RecName: Full=Glucan 1,3-beta-glucosidase	PF00150.17^Cellulase^Cellulase (glycosyl hydrolase family 5)^78-212^E:8.3e-14	.	.	GO:0005576^cellular_component^extracellular region`GO:0004338^molecular_function^glucan exo-1,3-beta-glucosidase activity`GO:0005975^biological_process^carbohydrate metabolic process`GO:0071555^biological_process^cell wall organization	GO:0004553^molecular_function^hydrolase activity, hydrolyzing O-glycosyl compounds`GO:0005975^biological_process^carbohydrate metabolic process
GH23	#N/A	#N/A	LE01Gene01933	14.0783	13.988	14.2095	11.8084	12.0707	11.2173	-2.35402	1.97e-11	1.72e-10	LE01Gene01933	YJBJ_BACSU^YJBJ_BACSU^Q:944-1324,H:24-150^28.3%ID^E:3.3e-07^RecName: Full=Putative murein lytic transglycosylase YjbJ	PF01464.19^SLT^Transglycosylase SLT domain^184-269^E:2.3e-12	.	.	.	.
CE4	#N/A	#N/A	LE01Gene03495	11.183	12.4185	11.6041	8.39629	9.79316	9.52037	-2.48007	5.5e-08	2.76e-07	LE01Gene03495	CDA_AMYRO^CDA_AMYRO^Q:391-1293,H:52-358^43.4%ID^E:2.4e-70^RecName: Full=Chitin deacetylase	PF01522.20^Polysacc_deac_1^Polysaccharide deacetylase^142-256^E:1.7e-25	.	.	GO:0004099^molecular_function^chitin deacetylase activity`GO:0006032^biological_process^chitin catabolic process`GO:0000272^biological_process^polysaccharide catabolic process	GO:0016810^molecular_function^hydrolase activity, acting on carbon-nitrogen (but not peptide) bonds`GO:0005975^biological_process^carbohydrate metabolic process
AA14	#N/A	#N/A	LE01Gene07498	14.0165	14.2452	14.2645	11.6283	11.3078	11.7907	-2.59088	5.28e-31	7.62e-29	LE01Gene07498	.	.	.	.	.	.
AA3	Lignin Degrading Auxiliary enzyme	alcohol oxidase	LE01Gene09192	12.7276	12.2308	11.8596	9.66749	10.0632	9.11542	-2.6519	0.000342721	0.000890388	LE01Gene09192	ALOX_CANBO^ALOX_CANBO^Q:78-1772,H:4-604^40%ID^E:6.1e-119^RecName: Full=Alcohol oxidase	.	.	.	.	.
AA7	#N/A	#N/A	LE01Gene02931	13.6517	12.9422	12.5945	10.3104	10.341	10.0537	-2.89202	5.25e-14	7.11e-13	LE01Gene02931	CHG5_CHAGB^CHG5_CHAGB^Q:125-1756,H:60-608^39.7%ID^E:2.5e-107^RecName: Full=FAD-linked oxidoreductase CHGG_01242-2 {ECO:0000303|PubMed:23611317}	.	.	.	.	.
AA2	Lignin Oxidase	Other peroxidase	LE01Gene03920	15.4364	15.0455	14.946	12.1962	11.894	11.6892	-3.21726	1.05e-13	1.36e-12	LE01Gene03920	CCPR_CRYNB^CCPR_CRYNB^Q:116-1207,H:3-377^57.6%ID^E:2.9e-119^RecName: Full=Cytochrome c peroxidase, mitochondrial	PF00141.22^peroxidase^Peroxidase^110-332^E:3.1e-47	COG0376^Bifunctional enzyme with both catalase and broad- spectrum peroxidase activity (By similarity)	KEGG:cnb:CNBD3710`KO:K00428	GO:0005759^cellular_component^mitochondrial matrix`GO:0004130^molecular_function^cytochrome-c peroxidase activity`GO:0020037^molecular_function^heme binding`GO:0046872^molecular_function^metal ion binding`GO:0006979^biological_process^response to oxidative stress	GO:0004601^molecular_function^peroxidase activity`GO:0020037^molecular_function^heme binding`GO:0006979^biological_process^response to oxidative stress`GO:0055114^biological_process^oxidation-reduction process
AA3; AA8	Lignin Degrading Auxiliary enzyme	aryl-alcohol oxidase	LE01Gene09156	12.5666	11.7337	11.9161	8.6988	9.01154	8.63157	-3.33062	2e-25	1.32e-23	LE01Gene09156	PDH1_AGACM^PDH1_AGACM^Q:146-1852,H:29-593^36.6%ID^E:2.7e-91^RecName: Full=Pyranose dehydrogenase {ECO:0000303|PubMed:24970179}	PF00732.18^GMC_oxred_N^GMC oxidoreductase^36-339^E:4.7e-64`PF05199.12^GMC_oxred_C^GMC oxidoreductase^444-588^E:8.3e-30	.	.	GO:0005576^cellular_component^extracellular region`GO:0050660^molecular_function^flavin adenine dinucleotide binding`GO:0033718^molecular_function^pyranose dehydrogenase (acceptor) activity`GO:0005975^biological_process^carbohydrate metabolic process	GO:0016614^molecular_function^oxidoreductase activity, acting on CH-OH group of donors`GO:0050660^molecular_function^flavin adenine dinucleotide binding`GO:0055114^biological_process^oxidation-reduction process
CE4	#N/A	#N/A	LE01Gene01633	14.5919	14.5538	14.6406	11.6966	11.262	10.5575	-3.35118	9.61e-28	9.28e-26	LE01Gene01633	CDA_CRYNH^CDA_CRYNH^Q:147-1112,H:25-337^46.2%ID^E:8.4e-73^RecName: Full=Chitin deacetylase	.	.	.	.	.
CBM50	#N/A	#N/A	LE01Gene04605	12.3235	13.538	13.0034	9.02846	10.2234	9.04945	-3.49045	1.38e-19	4.23e-18	LE01Gene04605	.	PF01476.19^LysM^LysM domain^32-77^E:5.8e-12`PF01476.19^LysM^LysM domain^82-122^E:1.4e-07	.	.	.	.
[truncated: 4 more rows]

## Sheet: ow_3-VS-ow_1
CAZyme_family	Class	Gene name	Gene_id	ow_1_a	ow_1_b	ow_1_c	ow_3_a	ow_3_b	ow_3_c	log2FoldChange	pvalue	padj	id	sprot_Top_BLASTX_hit	Pfam	eggnog	Kegg	gene_ontology_blast	gene_ontology_pfam
[truncated: 241 more rows]

## Sheet: ow_3-VS-ow_2
CAZyme_family	Class	Gene name	Gene_id	ow_2_a	ow_2_b	ow_2_c	ow_3_a	ow_3_b	ow_3_c	log2FoldChange	pvalue	padj	id	sprot_Top_BLASTX_hit	Pfam	eggnog	Kegg	gene_ontology_blast	gene_ontology_pfam
[truncated: 20 more rows]
